# Supplementary material for: Global sea-to-air flux climatology for bromoform, dibromomethane and methyl iodide
Source: Copernicus journal article supplement (doi:10.5194/acp-13-8915-2013), 2013-09-06
Supplement: Supplementary file 1 [file acp-13-8915-2013-supplement.zip]

## Supplement: Oceanic Concentration Data

In the following are listed all used oceanic concentration data (Table S6) of bromoform, dibromomethane and methyl iodide from the HalOcAt database project (<https://halocat.geomar.de/>). The data is uniquely marked with an identifier. Based on the identifier the corresponding metadata information is presented in Table S7.

**Table S6:** Oceanic concentration of  $\text{CHBr}_3$ ,  $\text{CH}_2\text{Br}_2$  and  $\text{CH}_3\text{I}$  data in  $\text{pmol L}^{-1}$  from the HalOcAt database project including sample depth in meter, latitude in  $^{\circ}\text{N}$ , longitude in  $^{\circ}\text{E}$  and an identifier. Based on the identifier metadata information to the corresponding dataset is available (Table S7).

| Identifier | Latitude<br>[ $^{\circ}\text{N}$ ] | Longitude<br>[ $^{\circ}\text{E}$ ] | $\text{CHBr}_3$<br>[ $\text{pmol L}^{-1}$ ] | $\text{CH}_2\text{Br}_2$<br>[ $\text{pmol L}^{-1}$ ] | $\text{CH}_3\text{I}$<br>[ $\text{pmol L}^{-1}$ ] | Sample Depth<br>[m] |
|------------|------------------------------------|-------------------------------------|---------------------------------------------|------------------------------------------------------|---------------------------------------------------|---------------------|
| 1          | -62.77                             | 3.63                                | 1.70                                        | 4.65                                                 | 1.57                                              | 4.00                |
| 1          | -62.50                             | 3.86                                | 2.80                                        | 4.11                                                 | 2.17                                              | 4.00                |
| 1          | -62.25                             | 4.09                                | 2.70                                        | 4.50                                                 | 1.93                                              | 4.00                |
| 1          | -62.02                             | 4.26                                | 3.60                                        | 4.59                                                 | 1.22                                              | 4.00                |
| 1          | -61.76                             | 4.43                                | 7.20                                        | 5.69                                                 | 0.79                                              | 4.00                |
| 1          | -61.51                             | 4.64                                | 6.50                                        | 5.74                                                 | 1.02                                              | 4.00                |
| 1          | -61.26                             | 4.77                                | 4.40                                        | 5.44                                                 | 0.90                                              | 4.00                |
| 1          | -61.02                             | 4.87                                | 3.20                                        | 5.66                                                 | 1.09                                              | 4.00                |
| 1          | -60.77                             | 4.96                                | 3.30                                        | 5.53                                                 | 1.10                                              | 4.00                |
| 1          | -60.53                             | 4.99                                | 3.00                                        | 5.09                                                 | 2.33                                              | 4.00                |
| 1          | -60.27                             | 5.00                                | 2.20                                        | 5.19                                                 | 2.00                                              | 4.00                |
| 1          | -60.02                             | 5.00                                | 2.80                                        | 5.41                                                 | 1.76                                              | 4.00                |
| 1          | -59.77                             | 5.00                                | 2.80                                        | 5.56                                                 | 1.99                                              | 4.00                |
| 1          | -59.51                             | 4.99                                | 2.60                                        | 5.28                                                 | 2.08                                              | 4.00                |
| 1          | -59.26                             | 5.00                                | 2.20                                        | 5.31                                                 | 2.00                                              | 4.00                |
| 1          | -59.01                             | 5.00                                | 2.90                                        | 5.40                                                 | 1.92                                              | 4.00                |
| 1          | -58.76                             | 5.03                                | 2.50                                        | 5.02                                                 | 1.89                                              | 4.00                |
| 1          | -58.52                             | 5.08                                | 4.50                                        | 5.27                                                 | 2.00                                              | 4.00                |
| 1          | -58.26                             | 4.99                                | 2.30                                        | 4.96                                                 | 2.04                                              | 4.00                |
| 1          | -58.03                             | 4.99                                | 3.10                                        | 5.06                                                 | 1.59                                              | 4.00                |
| 1          | -57.76                             | 5.00                                | 2.40                                        | 4.41                                                 | 1.30                                              | 4.00                |
| 1          | -57.52                             | 5.00                                | 1.90                                        | 4.56                                                 | 1.39                                              | 4.00                |
| 1          | -57.26                             | 5.01                                | 1.90                                        | 4.51                                                 | 1.39                                              | 4.00                |
| 1          | -57.01                             | 5.00                                | 2.40                                        | 4.71                                                 | 0.98                                              | 4.00                |
| 1          | -56.77                             | 5.01                                | 3.20                                        | 4.86                                                 | 1.30                                              | 4.00                |
| 1          | -56.51                             | 5.02                                | 3.00                                        | 4.97                                                 | 1.03                                              | 4.00                |
| 1          | -56.27                             | 5.02                                | 2.20                                        | 0.78                                                 | 0.91                                              | 4.00                |
| 1          | -56.03                             | 5.01                                | 2.90                                        | 5.01                                                 | 1.34                                              | 4.00                |
| 1          | -55.76                             | 5.00                                | 11.60                                       | 6.12                                                 | 0.85                                              | 4.00                |
| 1          | -55.52                             | 5.00                                | 10.10                                       | 5.56                                                 | 0.80                                              | 4.00                |
| 1          | -55.26                             | 5.00                                | 12.30                                       | 5.90                                                 | 0.80                                              | 4.00                |
| 1          | -55.02                             | 5.00                                | 11.60                                       | 5.45                                                 | 1.04                                              | 4.00                |
| 1          | -54.77                             | 5.00                                | 12.80                                       | 5.59                                                 | 0.80                                              | 4.00                |
| 1          | -54.51                             | 5.00                                | 10.40                                       | 5.41                                                 | 1.88                                              | 4.00                |

|   |        |       |       |      |      |      |
|---|--------|-------|-------|------|------|------|
| 1 | -54.26 | 5.00  | 11.30 | 5.80 | 0.82 | 4.00 |
| 1 | -54.02 | 5.00  | 11.20 | 6.08 | 1.07 | 4.00 |
| 1 | -53.77 | 5.00  | 13.60 | 5.49 | 1.06 | 4.00 |
| 1 | -53.52 | 5.00  | 10.10 | 5.40 | 0.92 | 4.00 |
| 1 | -53.27 | 4.99  | 9.10  | 5.67 | 1.11 | 4.00 |
| 1 | -53.01 | 5.00  | 9.00  | 5.51 | 1.49 | 4.00 |
| 1 | -52.76 | 5.00  | 3.20  | 5.17 | 1.57 | 4.00 |
| 1 | -52.52 | 5.11  | 3.60  | 5.10 | 1.48 | 4.00 |
| 1 | -52.27 | 5.32  | 3.30  | 5.10 | 1.57 | 4.00 |
| 1 | -52.01 | 5.55  | 3.70  | 4.60 | 1.57 | 4.00 |
| 1 | -51.85 | 5.68  | 3.60  | 4.64 | 1.48 | 4.00 |
| 1 | -51.52 | 5.94  | 0.60  | 4.53 | 1.54 | 4.00 |
| 1 | -51.27 | 6.14  | 1.00  | 4.31 | 1.56 | 4.00 |
| 1 | -51.01 | 6.36  | 0.80  | 4.16 | 1.42 | 4.00 |
| 1 | -50.77 | 6.56  | 1.30  | 4.28 | 1.56 | 4.00 |
| 1 | -50.54 | 6.76  | 1.20  | 3.93 | 1.50 | 4.00 |
| 1 | -50.26 | 6.97  | 0.40  | 4.21 | 1.91 | 4.00 |
| 1 | -50.02 | 7.16  | 0.80  | 3.99 | 1.74 | 4.00 |
| 1 | -49.77 | 7.37  | 0.80  | 4.27 | 1.88 | 4.00 |
| 1 | -49.53 | 7.56  | 1.00  | 4.21 | 1.82 | 4.00 |
| 1 | -49.28 | 7.75  | -999  | 4.05 | 1.72 | 4.00 |
| 1 | -49.03 | 7.95  | 2.00  | 4.39 | 1.74 | 4.00 |
| 1 | -48.78 | 8.16  | 0.90  | 5.18 | 2.72 | 4.00 |
| 1 | -48.52 | 8.35  | -999  | -999 | -999 | 4.00 |
| 1 | -48.26 | 8.56  | -999  | -999 | -999 | 4.00 |
| 1 | -48.02 | 8.74  | -999  | 3.14 | 1.78 | 4.00 |
| 1 | -47.77 | 8.92  | 4.50  | 4.19 | 1.72 | 4.00 |
| 1 | -47.53 | 9.10  | 3.20  | 3.70 | 1.50 | 4.00 |
| 1 | -47.27 | 9.29  | 1.90  | 2.36 | 1.63 | 4.00 |
| 1 | -47.03 | 9.49  | 0.30  | 4.09 | 1.82 | 4.00 |
| 1 | -46.76 | 9.70  | 0.80  | 4.35 | 1.62 | 4.00 |
| 1 | -46.52 | 9.89  | 1.80  | 4.28 | 1.82 | 4.00 |
| 1 | -46.26 | 10.08 | 1.20  | 3.48 | 1.87 | 4.00 |
| 1 | -46.02 | 10.25 | 0.60  | 3.68 | 1.70 | 4.00 |
| 1 | -45.77 | 10.43 | 0.60  | 3.95 | 1.84 | 4.00 |
| 1 | -45.52 | 10.60 | 1.40  | 3.82 | 2.04 | 4.00 |
| 1 | -45.26 | 10.78 | 1.50  | 3.44 | 2.07 | 4.00 |
| 1 | -45.03 | 10.94 | 1.30  | 2.97 | 2.41 | 4.00 |
| 1 | -44.76 | 11.14 | 1.80  | 4.42 | 2.29 | 4.00 |
| 1 | -44.52 | 11.32 | 2.00  | 4.01 | 2.49 | 4.00 |
| 1 | -44.26 | 11.50 | 6.20  | 5.49 | 1.93 | 4.00 |
| 1 | -44.03 | 11.67 | 6.80  | 4.44 | 2.10 | 4.00 |
| 1 | -43.89 | 11.78 | 6.50  | 5.19 | 2.49 | 4.00 |
| 1 | -43.52 | 12.05 | 12.30 | 5.80 | 3.09 | 4.00 |
| 1 | -43.26 | 12.22 | 4.00  | 4.28 | 6.61 | 4.00 |
| 1 | -43.01 | 12.39 | 2.80  | 4.58 | 7.48 | 4.00 |
| 1 | -43.10 | 12.00 | 2.83  | -999 | -999 | 4.00 |

|   |        |       |       |      |      |      |
|---|--------|-------|-------|------|------|------|
| 1 | -43.30 | 11.60 | 4.06  | -999 | -999 | 4.00 |
| 1 | -43.60 | 11.20 | 12.20 | -999 | -999 | 4.00 |
| 1 | -44.30 | 10.80 | 6.15  | -999 | -999 | 4.00 |
| 1 | -44.50 | 10.40 | 1.98  | -999 | -999 | 4.00 |
| 1 | -45.00 | 10.00 | 1.26  | -999 | -999 | 4.00 |
| 1 | -45.50 | 9.60  | 1.35  | -999 | -999 | 4.00 |
| 1 | -46.00 | 9.20  | 0.59  | -999 | -999 | 4.00 |
| 1 | -46.30 | 8.80  | 1.17  | -999 | -999 | 4.00 |
| 1 | -46.50 | 8.40  | 1.79  | -999 | -999 | 4.00 |
| 1 | -46.80 | 8.00  | 0.76  | -999 | -999 | 4.00 |
| 1 | -47.10 | 7.60  | 0.35  | -999 | -999 | 4.00 |
| 1 | -47.50 | 7.20  | 3.18  | -999 | -999 | 4.00 |
| 1 | -47.80 | 6.80  | 4.49  | -999 | -999 | 4.00 |
| 1 | -49.10 | 6.40  | 1.95  | -999 | -999 | 4.00 |
| 1 | -48.80 | 6.00  | 0.87  | -999 | -999 | 4.00 |
| 1 | -49.60 | 5.60  | 0.96  | -999 | -999 | 4.00 |
| 1 | -50.30 | 5.20  | 0.37  | -999 | -999 | 4.00 |
| 1 | -50.60 | 4.80  | 1.21  | -999 | -999 | 4.00 |
| 1 | -51.50 | 4.40  | 0.62  | -999 | -999 | 4.00 |
| 1 | -51.90 | 4.00  | 3.53  | -999 | -999 | 4.00 |
| 1 | -52.30 | 4.00  | 3.31  | -999 | -999 | 4.00 |
| 1 | -53.10 | 4.00  | 8.95  | -999 | -999 | 4.00 |
| 1 | -53.80 | 4.00  | 13.50 | -999 | -999 | 4.00 |
| 1 | -53.50 | 4.00  | 10.00 | -999 | -999 | 4.00 |
| 1 | -54.10 | 4.00  | 11.20 | -999 | -999 | 4.00 |
| 1 | -54.50 | 4.00  | 10.40 | -999 | -999 | 4.00 |
| 1 | -54.80 | 4.00  | 12.80 | -999 | -999 | 4.00 |
| 1 | -55.10 | 4.00  | 11.50 | -999 | -999 | 4.00 |
| 1 | -55.30 | 4.00  | 12.30 | -999 | -999 | 4.00 |
| 1 | -55.60 | 4.00  | 10.00 | -999 | -999 | 4.00 |
| 1 | -55.80 | 4.00  | 11.60 | -999 | -999 | 4.00 |
| 1 | -56.10 | 4.00  | 2.92  | -999 | -999 | 4.00 |
| 1 | -56.30 | 4.00  | 2.27  | -999 | -999 | 4.00 |
| 1 | -56.50 | 4.00  | 3.00  | -999 | -999 | 4.00 |
| 1 | -56.80 | 4.00  | 3.24  | -999 | -999 | 4.00 |
| 1 | -57.00 | 4.00  | 2.36  | -999 | -999 | 4.00 |
| 1 | -57.30 | 4.00  | 1.91  | -999 | -999 | 4.00 |
| 1 | -57.50 | 4.00  | 1.91  | -999 | -999 | 4.00 |
| 1 | -57.80 | 4.00  | 2.34  | -999 | -999 | 4.00 |
| 1 | -58.60 | 4.00  | 4.46  | -999 | -999 | 4.00 |
| 1 | -58.30 | 4.00  | 2.35  | -999 | -999 | 4.00 |
| 1 | -59.00 | 4.00  | 2.86  | -999 | -999 | 4.00 |
| 1 | -60.20 | 4.00  | 2.23  | -999 | -999 | 4.00 |
| 1 | -61.00 | 4.00  | 3.16  | -999 | -999 | 4.00 |
| 1 | -61.80 | 3.70  | 7.23  | -999 | -999 | 4.00 |
| 1 | -61.30 | 3.40  | 4.43  | -999 | -999 | 4.00 |
| 1 | -62.00 | 3.10  | 3.56  | -999 | -999 | 4.00 |

|   |        |       |      |      |       |       |
|---|--------|-------|------|------|-------|-------|
| 1 | -62.30 | 2.80  | 2.73 | -999 | -999  | 4.00  |
| 1 | -62.80 | -4.00 | 1.67 | -999 | -999  | 4.00  |
| 2 | 50.25  | -4.22 | -999 | -999 | 7.70  | 1.00  |
| 2 | 50.25  | -4.22 | -999 | -999 | 9.50  | 10.00 |
| 2 | 50.25  | -4.22 | -999 | -999 | 10.90 | 1.00  |
| 2 | 50.25  | -4.22 | -999 | -999 | 9.90  | 10.00 |
| 2 | 50.25  | -4.22 | -999 | -999 | 9.80  | 1.00  |
| 2 | 50.25  | -4.22 | -999 | -999 | 9.30  | 10.00 |
| 2 | 50.25  | -4.22 | -999 | -999 | 14.40 | 0.25  |
| 2 | 50.25  | -4.22 | -999 | -999 | 11.40 | 1.00  |
| 2 | 50.25  | -4.22 | -999 | -999 | 10.60 | 10.00 |
| 2 | 50.25  | -4.22 | -999 | -999 | 8.00  | 1.00  |
| 2 | 50.25  | -4.22 | -999 | -999 | 9.60  | 10.00 |
| 2 | 50.25  | -4.22 | -999 | -999 | 19.50 | 0.25  |
| 2 | 50.25  | -4.22 | -999 | -999 | 14.60 | 1.00  |
| 2 | 50.25  | -4.22 | -999 | -999 | 16.50 | 10.00 |
| 2 | 50.25  | -4.22 | -999 | -999 | 9.50  | 1.00  |
| 2 | 50.25  | -4.22 | -999 | -999 | 11.10 | 10.00 |
| 2 | 50.25  | -4.22 | -999 | -999 | 8.60  | 1.00  |
| 2 | 50.25  | -4.22 | -999 | -999 | 9.30  | 10.00 |
| 2 | 50.25  | -4.22 | -999 | -999 | 7.40  | 0.25  |
| 2 | 50.25  | -4.22 | -999 | -999 | 8.00  | 1.00  |
| 2 | 50.25  | -4.22 | -999 | -999 | 7.20  | 10.00 |
| 2 | 50.25  | -4.22 | -999 | -999 | 9.80  | 1.00  |
| 2 | 50.25  | -4.22 | -999 | -999 | 8.90  | 10.00 |
| 2 | 50.25  | -4.22 | -999 | -999 | 10.90 | 1.00  |
| 2 | 50.25  | -4.22 | -999 | -999 | 6.60  | 10.00 |
| 2 | 50.25  | -4.22 | -999 | -999 | 10.60 | 1.00  |
| 2 | 50.25  | -4.22 | -999 | -999 | 6.90  | 10.00 |
| 2 | 50.25  | -4.22 | -999 | -999 | 4.00  | 0.25  |
| 2 | 50.25  | -4.22 | -999 | -999 | 4.60  | 1.00  |
| 2 | 50.25  | -4.22 | -999 | -999 | 5.00  | 10.00 |
| 2 | 50.25  | -4.22 | -999 | -999 | 5.30  | 1.00  |
| 2 | 50.25  | -4.22 | -999 | -999 | 4.90  | 1.00  |
| 2 | 50.25  | -4.22 | -999 | -999 | 4.90  | 1.00  |
| 2 | 50.25  | -4.22 | -999 | -999 | 2.70  | 1.00  |
| 2 | 50.25  | -4.22 | -999 | -999 | 1.30  | 1.00  |
| 2 | 50.25  | -4.22 | -999 | -999 | 1.50  | 1.00  |
| 2 | 50.25  | -4.22 | -999 | -999 | 0.70  | 10.00 |
| 2 | 50.25  | -4.22 | -999 | -999 | 1.80  | 1.00  |
| 2 | 50.25  | -4.22 | -999 | -999 | 2.10  | 10.00 |
| 2 | 50.25  | -4.22 | -999 | -999 | 1.00  | 1.00  |
| 2 | 50.25  | -4.22 | -999 | -999 | 2.80  | 10.00 |
| 2 | 50.25  | -4.22 | -999 | -999 | 2.00  | 1.00  |
| 2 | 50.25  | -4.22 | -999 | -999 | 1.70  | 1.00  |
| 2 | 50.25  | -4.22 | -999 | -999 | 2.70  | 10.00 |
| 2 | 50.25  | -4.22 | -999 | -999 | 8.00  | 1.00  |

|   |       |       |      |      |       |       |
|---|-------|-------|------|------|-------|-------|
| 2 | 50.25 | -4.22 | -999 | -999 | 2.70  | 10.00 |
| 2 | 50.25 | -4.22 | -999 | -999 | 3.50  | 1.00  |
| 2 | 50.25 | -4.22 | -999 | -999 | 3.10  | 1.00  |
| 2 | 50.25 | -4.22 | -999 | -999 | 1.80  | 1.00  |
| 2 | 50.25 | -4.22 | -999 | -999 | 4.10  | 10.00 |
| 2 | 50.25 | -4.22 | -999 | -999 | 4.50  | 1.00  |
| 2 | 50.25 | -4.22 | -999 | -999 | 4.10  | 10.00 |
| 2 | 50.25 | -4.22 | -999 | -999 | 4.30  | 1.00  |
| 2 | 50.25 | -4.22 | -999 | -999 | 4.30  | 10.00 |
| 2 | 50.25 | -4.22 | -999 | -999 | 4.40  | 1.00  |
| 2 | 50.25 | -4.22 | -999 | -999 | 4.90  | 10.00 |
| 2 | 50.25 | -4.22 | -999 | -999 | 5.70  | 10.00 |
| 2 | 50.25 | -4.22 | -999 | -999 | 5.90  | 1.00  |
| 2 | 50.25 | -4.22 | -999 | -999 | 5.50  | 10.00 |
| 2 | 50.25 | -4.22 | -999 | -999 | 8.10  | 1.00  |
| 2 | 50.25 | -4.22 | -999 | -999 | 5.10  | 10.00 |
| 2 | 50.25 | -4.22 | -999 | -999 | 11.80 | 1.00  |
| 2 | 50.25 | -4.22 | -999 | -999 | 7.50  | 10.00 |
| 2 | 50.25 | -4.22 | -999 | -999 | 10.80 | 1.00  |
| 2 | 50.25 | -4.22 | -999 | -999 | 7.90  | 10.00 |
| 2 | 50.25 | -4.22 | -999 | -999 | 7.80  | 1.00  |
| 2 | 50.25 | -4.22 | -999 | -999 | 7.20  | 10.00 |
| 2 | 50.25 | -4.22 | -999 | -999 | 7.10  | 1.00  |
| 2 | 50.25 | -4.22 | -999 | -999 | 10.50 | 10.00 |
| 2 | 50.25 | -4.22 | -999 | -999 | 10.90 | 1.00  |
| 2 | 50.25 | -4.22 | -999 | -999 | 7.60  | 10.00 |
| 2 | 50.25 | -4.22 | -999 | -999 | 8.40  | 1.00  |
| 2 | 50.25 | -4.22 | -999 | -999 | 10.50 | 10.00 |
| 2 | 50.25 | -4.22 | -999 | -999 | 7.60  | 1.00  |
| 2 | 50.25 | -4.22 | -999 | -999 | 4.20  | 10.00 |
| 2 | 50.25 | -4.22 | -999 | -999 | 5.80  | 1.00  |
| 2 | 50.25 | -4.22 | -999 | -999 | 4.60  | 10.00 |
| 2 | 50.25 | -4.22 | -999 | -999 | 6.20  | 1.00  |
| 2 | 50.25 | -4.22 | -999 | -999 | 11.30 | 10.00 |
| 2 | 50.25 | -4.22 | -999 | -999 | 8.10  | 1.00  |
| 2 | 50.25 | -4.22 | -999 | -999 | 7.00  | 10.00 |
| 2 | 50.25 | -4.22 | -999 | -999 | 7.50  | 1.00  |
| 2 | 50.25 | -4.22 | -999 | -999 | 9.30  | 10.00 |
| 2 | 50.25 | -4.22 | -999 | -999 | 8.00  | 1.00  |
| 2 | 50.25 | -4.22 | -999 | -999 | 9.20  | 10.00 |
| 2 | 50.25 | -4.22 | -999 | -999 | 7.40  | 1.00  |
| 2 | 50.25 | -4.22 | -999 | -999 | 11.70 | 10.00 |
| 2 | 50.25 | -4.22 | -999 | -999 | 7.10  | 1.00  |
| 2 | 50.25 | -4.22 | -999 | -999 | 57.80 | 10.00 |
| 2 | 50.25 | -4.22 | -999 | -999 | 12.80 | 1.00  |
| 2 | 50.25 | -4.22 | -999 | -999 | 11.40 | 10.00 |
| 2 | 50.25 | -4.22 | -999 | -999 | 11.60 | 1.00  |

|   |       |       |       |      |       |       |
|---|-------|-------|-------|------|-------|-------|
| 2 | 50.25 | -4.22 | -999  | -999 | 12.80 | 10.00 |
| 2 | 50.25 | -4.22 | -999  | -999 | 12.90 | 1.00  |
| 2 | 50.25 | -4.22 | -999  | -999 | 9.80  | 10.00 |
| 2 | 50.25 | -4.22 | -999  | -999 | 9.10  | 1.00  |
| 2 | 50.25 | -4.22 | -999  | -999 | 5.80  | 10.00 |
| 2 | 50.25 | -4.22 | -999  | -999 | 7.00  | 1.00  |
| 2 | 50.25 | -4.22 | -999  | -999 | 6.10  | 10.00 |
| 2 | 50.25 | -4.22 | -999  | -999 | 5.60  | 1.00  |
| 2 | 50.25 | -4.22 | -999  | -999 | 3.80  | 10.00 |
| 2 | 50.25 | -4.22 | -999  | -999 | 3.80  | 1.00  |
| 2 | 50.25 | -4.22 | -999  | -999 | 2.30  | 10.00 |
| 2 | 50.25 | -4.22 | -999  | -999 | 2.50  | 1.00  |
| 2 | 50.25 | -4.22 | -999  | -999 | 3.10  | 10.00 |
| 2 | 50.25 | -4.22 | -999  | -999 | 6.40  | 1.00  |
| 2 | 50.25 | -4.22 | -999  | -999 | 2.20  | 10.00 |
| 2 | 50.25 | -4.22 | -999  | -999 | 2.40  | 1.00  |
| 2 | 50.25 | -4.22 | -999  | -999 | 0.60  | 10.00 |
| 2 | 50.25 | -4.22 | -999  | -999 | 3.40  | 2.00  |
| 2 | 50.25 | -4.22 | -999  | -999 | 0.70  | 10.00 |
| 2 | 50.25 | -4.22 | -999  | -999 | 2.30  | 1.00  |
| 2 | 50.25 | -4.22 | -999  | -999 | 2.20  | 10.00 |
| 2 | 50.25 | -4.22 | -999  | -999 | 2.20  | 2.00  |
| 2 | 50.25 | -4.22 | -999  | -999 | 2.40  | 10.00 |
| 2 | 50.25 | -4.22 | -999  | -999 | 3.50  | 1.00  |
| 2 | 50.25 | -4.22 | -999  | -999 | 2.70  | 2.00  |
| 2 | 50.25 | -4.22 | -999  | -999 | 3.00  | 10.00 |
| 2 | 50.25 | -4.22 | -999  | -999 | 2.50  | 2.00  |
| 2 | 50.25 | -4.22 | -999  | -999 | 4.00  | 10.00 |
| 2 | 50.25 | -4.22 | -999  | -999 | 6.80  | 2.00  |
| 3 | 58.88 | 3.05  | 13.60 | -999 | 29.00 | 9.40  |
| 3 | 58.85 | 3.25  | 9.90  | 4.10 | 23.60 | 8.70  |
| 3 | 58.83 | 3.21  | 9.20  | -999 | 19.60 | 4.20  |
| 3 | 58.83 | 3.21  | 11.00 | 2.30 | 14.40 | 9.30  |
| 3 | 58.78 | 3.30  | 5.80  | 4.80 | 22.50 | 4.30  |
| 3 | 58.78 | 3.30  | 7.40  | 5.40 | 19.40 | 9.10  |
| 3 | 58.71 | 3.41  | 8.60  | -999 | 22.00 | 4.10  |
| 3 | 58.71 | 3.41  | 12.00 | 4.50 | 20.40 | 8.90  |
| 3 | 58.61 | 3.51  | 7.80  | 3.80 | 24.30 | 4.30  |
| 3 | 58.61 | 3.51  | 10.10 | 5.20 | 17.20 | 9.20  |
| 3 | 58.55 | 3.45  | 8.50  | 3.90 | 30.40 | 5.00  |
| 3 | 58.55 | 3.45  | 8.10  | 3.70 | 27.50 | 10.00 |
| 3 | 58.51 | 3.51  | 8.20  | -999 | 21.10 | 4.10  |
| 3 | 58.51 | 3.51  | 6.60  | 1.80 | 15.10 | 9.00  |
| 3 | 58.43 | 3.50  | 7.20  | -999 | 25.60 | 2.90  |
| 3 | 58.43 | 3.50  | 9.50  | 2.80 | 21.30 | 7.90  |
| 3 | 58.41 | 3.41  | 5.80  | 0.00 | 18.70 | 3.80  |
| 3 | 58.41 | 3.41  | 8.20  | 0.00 | 13.30 | 8.90  |

|   |       |         |       |      |       |      |
|---|-------|---------|-------|------|-------|------|
| 3 | 58.34 | 3.48    | 7.50  | 0.00 | 18.90 | 4.30 |
| 3 | 58.34 | 3.48    | 8.00  | 2.60 | 15.70 | 7.50 |
| 3 | 58.29 | 3.52    | 6.30  | 0.00 | 12.90 | 4.40 |
| 3 | 58.29 | 3.52    | 7.40  | 0.00 | 27.40 | 9.20 |
| 3 | 58.26 | 3.49    | 8.40  | 0.00 | 17.80 | 1.20 |
| 3 | 58.26 | 3.49    | 8.30  | 2.20 | 13.00 | 5.70 |
| 4 | 45.09 | -128.78 | -999  | -999 | -999  | -999 |
| 4 | 44.21 | -129.72 | -999  | -999 | -999  | -999 |
| 4 | 44.20 | -129.75 | -999  | -999 | 5.28  | -999 |
| 4 | 44.16 | -129.75 | -999  | -999 | -999  | -999 |
| 4 | 44.21 | -129.63 | -999  | -999 | 4.07  | -999 |
| 4 | 44.24 | -129.61 | -999  | -999 | 3.95  | -999 |
| 4 | 44.30 | -129.59 | 4.58  | 0.91 | 3.93  | -999 |
| 4 | 44.03 | -129.32 | 4.46  | 1.15 | 2.88  | -999 |
| 4 | 43.61 | -128.93 | 4.39  | 1.47 | 4.01  | -999 |
| 4 | 43.17 | -128.54 | 4.20  | 1.76 | 3.51  | -999 |
| 4 | 42.75 | -128.15 | 3.94  | 1.75 | 2.34  | -999 |
| 4 | 42.33 | -127.76 | 4.50  | 1.27 | 2.93  | -999 |
| 4 | 41.92 | -127.38 | 4.16  | 2.90 | 3.07  | -999 |
| 4 | 41.49 | -127.02 | 4.96  | 1.94 | 2.99  | -999 |
| 4 | 41.08 | -126.64 | 4.80  | 1.35 | 2.84  | -999 |
| 4 | 40.57 | -126.17 | 4.08  | 1.17 | 3.71  | -999 |
| 4 | 40.28 | -125.93 | 3.44  | 1.14 | 4.23  | -999 |
| 4 | 39.85 | -125.55 | 3.36  | 0.46 | 4.45  | -999 |
| 4 | 39.57 | -125.29 | 3.06  | 0.68 | 4.39  | -999 |
| 4 | 39.12 | -125.00 | 2.93  | -999 | -999  | -999 |
| 4 | 38.84 | -124.74 | 3.62  | 1.65 | 4.44  | -999 |
| 4 | 38.49 | -124.26 | 5.47  | 0.94 | 3.27  | -999 |
| 4 | 38.31 | -123.89 | 8.96  | 2.08 | 4.14  | -999 |
| 4 | 38.06 | -123.33 | 10.30 | 2.35 | 4.10  | -999 |
| 4 | 37.89 | -122.97 | 12.83 | 1.24 | 3.89  | -999 |
| 4 | 37.22 | -123.11 | 15.68 | 0.83 | 3.60  | -999 |
| 4 | 36.88 | -123.19 | 12.08 | 1.21 | 3.58  | -999 |
| 4 | 36.38 | -123.33 | 7.55  | 1.22 | 6.32  | -999 |
| 4 | 36.38 | -123.33 | 7.55  | 1.41 | 6.32  | -999 |
| 4 | 36.03 | -123.39 | 6.63  | 2.09 | 5.55  | -999 |
| 4 | 35.52 | -123.30 | 5.70  | 2.89 | 5.87  | -999 |
| 4 | 35.17 | -123.22 | 5.36  | 2.58 | 4.72  | -999 |
| 4 | 34.65 | -123.13 | 3.66  | 2.31 | 6.85  | -999 |
| 4 | 34.32 | -123.07 | 3.24  | 2.47 | 6.98  | -999 |
| 4 | 33.81 | -122.97 | 3.16  | 2.24 | 6.66  | -999 |
| 4 | 33.38 | -122.88 | 4.85  | 2.31 | 7.79  | -999 |
| 4 | 32.86 | -122.77 | 3.51  | 2.59 | 6.85  | -999 |
| 4 | 31.08 | -122.45 | 3.57  | 2.36 | 7.79  | -999 |
| 4 | 30.71 | -122.38 | 3.58  | 2.23 | 8.39  | -999 |
| 4 | 30.25 | -122.30 | 3.46  | 1.99 | 7.25  | -999 |
| 4 | 29.94 | -122.23 | 3.76  | 2.07 | 5.67  | -999 |

|   |       |         |      |      |       |      |
|---|-------|---------|------|------|-------|------|
| 4 | 29.51 | -122.15 | 2.92 | 1.75 | 7.86  | -999 |
| 4 | 29.20 | -122.10 | 2.62 | 1.88 | 8.06  | -999 |
| 4 | 28.77 | -121.95 | 2.88 | 1.90 | 10.32 | -999 |
| 4 | 28.47 | -121.84 | 2.65 | 2.12 | 10.98 | -999 |
| 4 | 28.03 | -121.70 | 2.83 | 2.07 | 10.90 | -999 |
| 4 | 27.73 | -121.59 | 2.92 | 1.96 | 10.86 | -999 |
| 4 | 27.29 | -121.44 | 2.63 | 2.03 | 11.17 | -999 |
| 4 | 26.99 | -121.32 | 2.36 | 1.78 | 7.38  | -999 |
| 4 | 26.55 | -121.18 | 2.53 | 1.93 | 7.75  | -999 |
| 4 | 26.12 | -121.03 | 2.94 | 2.09 | 8.11  | -999 |
| 4 | 25.68 | -120.88 | 2.41 | 1.82 | 7.47  | -999 |
| 4 | 25.38 | -120.78 | 2.73 | 1.91 | 7.08  | -999 |
| 4 | 24.95 | -120.63 | 2.61 | 1.95 | 7.46  | -999 |
| 4 | 24.63 | -120.51 | 2.49 | 1.78 | 5.10  | -999 |
| 4 | 24.19 | -120.37 | 3.13 | 1.59 | 4.80  | -999 |
| 4 | 23.86 | -120.27 | 2.93 | 1.99 | 4.99  | -999 |
| 4 | 23.41 | -120.12 | 3.22 | 1.94 | 4.62  | -999 |
| 4 | 23.09 | -120.01 | 3.20 | 1.89 | 6.39  | -999 |
| 4 | 22.64 | -119.86 | 3.07 | 1.81 | 6.21  | -999 |
| 4 | 22.32 | -119.76 | 2.93 | 1.81 | 5.36  | -999 |
| 4 | 21.88 | -119.62 | 3.07 | 1.83 | 5.09  | -999 |
| 4 | 21.57 | -119.51 | 2.77 | 1.57 | 5.53  | -999 |
| 4 | 21.13 | -119.37 | 2.20 | 1.72 | 5.16  | -999 |
| 4 | 20.82 | -119.27 | 2.10 | 1.43 | 5.02  | -999 |
| 4 | 19.04 | -118.68 | 2.19 | 1.60 | 4.58  | -999 |
| 4 | 18.72 | -118.58 | 2.34 | 1.42 | 4.53  | -999 |
| 4 | 18.28 | -118.44 | 2.73 | 1.63 | 4.15  | -999 |
| 4 | 17.97 | -118.34 | 2.31 | 1.34 | 4.91  | -999 |
| 4 | 17.53 | -118.20 | 2.40 | 1.60 | 3.33  | -999 |
| 4 | 17.21 | -118.13 | 2.50 | 1.49 | 3.16  | -999 |
| 4 | 16.80 | -117.97 | 2.44 | 1.51 | 3.40  | -999 |
| 4 | 16.49 | -117.88 | 2.11 | 1.24 | 3.76  | -999 |
| 4 | 16.05 | -117.75 | 2.52 | 1.35 | 3.30  | -999 |
| 4 | 15.79 | -117.60 | 3.96 | 2.00 | 4.02  | -999 |
| 4 | 15.39 | -117.40 | 4.91 | 2.85 | 3.88  | -999 |
| 4 | 15.10 | -117.27 | 5.12 | 2.32 | 3.86  | -999 |
| 4 | 14.71 | -117.08 | 5.11 | 2.07 | 4.73  | -999 |
| 4 | 14.30 | -116.86 | 4.03 | 1.75 | 5.82  | -999 |
| 4 | 13.89 | -116.66 | 5.87 | 1.80 | 5.93  | -999 |
| 4 | 13.60 | -116.52 | 5.15 | 2.18 | 4.81  | -999 |
| 4 | 12.67 | -116.08 | 5.98 | 2.16 | 3.07  | -999 |
| 4 | 12.38 | -115.93 | 5.07 | 2.25 | 2.70  | -999 |
| 4 | 11.97 | -115.73 | 4.61 | 2.08 | 3.29  | -999 |
| 4 | 11.68 | -115.59 | 4.48 | 2.12 | 2.72  | -999 |
| 4 | 11.27 | -115.39 | 5.27 | 2.72 | 2.36  | -999 |
| 4 | 10.97 | -115.25 | 4.03 | 2.25 | 2.15  | -999 |
| 4 | 10.55 | -115.05 | 5.23 | 2.56 | 2.35  | -999 |



|   |       |         |       |      |      |      |
|---|-------|---------|-------|------|------|------|
| 4 | 10.26 | -114.91 | 5.18  | 2.78 | 3.37 | -999 |
| 4 | 9.85  | -114.71 | 6.47  | 3.21 | 3.06 | -999 |
| 4 | 9.14  | -114.36 | 3.69  | 2.36 | 3.29 | -999 |
| 4 | 8.62  | -114.11 | 3.20  | 1.77 | 3.12 | -999 |
| 4 | 8.33  | -113.97 | 2.95  | 1.52 | 3.19 | -999 |
| 4 | 7.92  | -113.78 | 3.15  | 1.66 | 3.80 | -999 |
| 4 | 7.63  | -113.63 | 2.83  | 1.54 | 3.49 | -999 |
| 4 | 7.20  | -113.43 | 2.77  | 1.45 | 3.57 | -999 |
| 4 | 6.90  | -113.32 | 2.82  | 1.43 | 3.72 | -999 |
| 4 | 6.46  | -113.11 | 2.91  | 1.38 | 4.20 | -999 |
| 4 | 6.14  | -112.97 | 3.40  | 1.53 | 4.62 | -999 |
| 4 | 5.71  | -112.74 | 5.79  | 2.09 | 5.01 | -999 |
| 4 | 5.40  | -112.59 | 9.24  | 3.07 | 3.98 | -999 |
| 4 | 5.05  | -112.45 | 8.72  | 2.78 | 3.96 | -999 |
| 4 | 4.75  | -112.30 | 9.42  | 3.03 | 3.86 | -999 |
| 4 | 4.33  | -112.10 | 8.89  | 2.85 | 4.03 | -999 |
| 4 | 4.03  | -111.95 | 9.96  | 3.18 | 4.40 | -999 |
| 4 | 3.62  | -111.76 | 10.95 | 3.63 | 4.77 | -999 |
| 4 | 3.34  | -111.61 | 8.24  | 3.37 | 4.43 | -999 |
| 4 | 2.87  | -111.39 | 8.18  | 2.97 | 4.31 | -999 |
| 4 | 2.58  | -111.25 | 8.48  | 2.76 | 3.92 | -999 |
| 4 | 2.17  | -111.07 | 8.37  | 2.50 | 3.45 | -999 |
| 4 | 1.89  | -110.92 | 7.04  | 2.23 | 3.87 | -999 |
| 4 | 1.48  | -110.73 | 7.47  | 2.56 | 4.07 | -999 |
| 4 | 1.19  | -110.58 | 7.40  | 2.52 | 4.27 | -999 |
| 4 | 0.80  | -110.39 | 5.69  | 2.27 | 3.99 | -999 |
| 4 | 0.52  | -110.25 | 7.64  | 2.87 | 3.98 | -999 |
| 4 | 0.12  | -110.05 | 9.42  | 3.60 | 3.86 | -999 |
| 4 | -0.15 | -109.91 | 13.67 | 4.69 | 3.64 | -999 |
| 4 | -0.44 | -109.73 | -999  | 4.94 | 3.59 | -999 |
| 4 | -0.46 | -109.75 | 16.59 | 5.14 | 3.60 | -999 |
| 4 | -0.67 | -109.65 | 15.69 | 5.25 | 3.62 | -999 |
| 4 | -0.97 | -109.46 | 15.88 | 5.13 | 3.57 | -999 |
| 4 | -1.37 | -109.19 | 14.97 | 5.21 | 3.34 | -999 |
| 4 | -2.18 | -108.65 | -999  | 3.97 | 2.29 | -999 |
| 4 | -2.45 | -108.49 | -999  | 3.91 | 2.17 | -999 |
| 4 | -2.82 | -108.24 | 12.74 | 3.37 | 1.86 | -999 |
| 4 | -3.08 | -108.08 | 9.37  | 2.82 | 1.84 | -999 |
| 4 | -3.45 | -107.84 | 8.29  | 2.31 | 2.02 | -999 |
| 4 | -3.71 | -107.68 | 8.10  | 2.63 | 1.95 | -999 |
| 4 | -4.07 | -107.45 | 8.20  | 2.26 | 2.14 | -999 |
| 4 | -4.33 | -107.28 | 8.18  | 2.47 | 2.22 | -999 |
| 4 | -4.69 | -107.03 | 9.09  | 2.34 | 2.67 | -999 |
| 4 | -4.95 | -106.86 | 8.72  | 2.04 | 2.63 | -999 |
| 4 | -5.33 | -106.62 | 7.97  | 2.12 | 2.66 | -999 |
| 4 | -5.59 | -106.45 | 7.77  | 2.10 | 2.63 | -999 |
| 4 | -5.96 | -106.20 | 8.30  | 1.94 | 2.96 | -999 |

|   |        |         |      |      |      |      |
|---|--------|---------|------|------|------|------|
| 4 | -6.24  | -106.02 | 9.32 | 1.91 | 2.85 | -999 |
| 4 | -7.25  | -105.35 | 8.85 | 1.51 | 2.57 | -999 |
| 4 | -7.52  | -105.18 | 6.99 | 1.48 | 2.44 | -999 |
| 4 | -7.89  | -104.94 | 6.77 | 1.61 | 2.46 | -999 |
| 4 | -8.17  | -104.76 | 5.72 | 1.42 | 2.69 | -999 |
| 4 | -8.55  | -104.51 | 6.64 | 1.40 | 2.61 | -999 |
| 4 | -8.83  | -104.32 | 6.56 | 1.57 | 2.67 | -999 |
| 4 | -9.21  | -104.06 | 6.29 | 1.42 | 2.60 | -999 |
| 4 | -9.50  | -103.89 | 5.53 | 1.34 | 2.73 | -999 |
| 4 | -9.89  | -103.64 | 4.73 | 1.20 | 3.66 | -999 |
| 4 | -10.16 | -103.45 | 5.22 | 1.24 | 3.52 | -999 |
| 4 | -10.55 | -103.21 | 4.31 | 1.09 | 3.24 | -999 |
| 4 | -10.82 | -103.03 | 5.21 | 1.18 | 3.29 | -999 |
| 4 | -11.20 | -102.78 | 5.01 | 1.20 | 3.46 | -999 |
| 4 | -11.47 | -102.59 | 4.56 | 1.04 | 3.71 | -999 |
| 4 | -12.49 | -101.92 | 4.01 | 1.05 | 3.84 | -999 |
| 4 | -12.77 | -101.74 | 5.30 | 1.25 | 5.23 | -999 |
| 4 | -13.14 | -101.49 | 6.75 | 1.54 | 5.06 | -999 |
| 4 | -13.41 | -101.31 | 7.48 | 1.98 | 5.70 | -999 |
| 4 | -13.78 | -101.07 | 5.98 | 1.53 | 4.09 | -999 |
| 4 | -14.05 | -100.90 | 4.81 | 1.33 | 4.13 | -999 |
| 4 | -14.41 | -100.64 | 3.88 | 1.11 | 4.19 | -999 |
| 4 | -14.67 | -100.46 | 2.15 | 0.85 | 4.68 | -999 |
| 4 | -15.04 | -100.22 | 3.15 | 1.12 | 5.10 | -999 |
| 4 | -15.31 | -100.04 | 1.93 | 0.89 | 7.56 | -999 |
| 4 | -15.68 | -99.79  | 1.79 | 0.98 | 6.78 | -999 |
| 4 | -15.94 | -99.62  | 2.08 | 1.07 | 6.76 | -999 |
| 4 | -16.51 | -99.24  | 1.42 | 0.94 | 6.27 | -999 |
| 4 | -16.76 | -99.06  | 1.81 | 0.91 | 5.57 | -999 |
| 4 | -17.13 | -98.80  | 1.61 | 0.78 | 6.62 | -999 |
| 4 | -17.40 | -98.62  | 1.63 | 0.85 | 6.78 | -999 |
| 4 | -17.77 | -98.37  | 1.39 | 0.85 | 6.77 | -999 |
| 4 | -18.03 | -98.19  | 1.42 | 0.81 | 6.89 | -999 |
| 4 | -18.40 | -97.94  | 1.76 | 0.97 | 6.23 | -999 |
| 4 | -18.66 | -97.76  | 1.68 | 0.68 | 6.37 | -999 |
| 4 | -19.04 | -97.52  | 1.44 | 0.71 | 7.06 | -999 |
| 4 | -19.31 | -97.33  | 1.44 | 0.82 | 7.91 | -999 |
| 4 | -19.66 | -97.09  | 1.42 | 0.77 | 8.80 | -999 |
| 4 | -19.92 | -96.91  | 1.26 | 0.84 | 7.27 | -999 |
| 4 | -20.30 | -96.65  | 1.31 | 0.88 | 8.39 | -999 |
| 4 | -20.57 | -96.47  | 1.17 | 0.81 | 8.14 | -999 |
| 4 | -20.94 | -96.21  | 1.14 | 0.89 | 7.85 | -999 |
| 4 | -21.21 | -96.03  | 1.08 | 0.84 | 7.55 | -999 |
| 4 | -21.66 | -95.70  | 1.09 | 0.76 | 7.82 | -999 |
| 4 | -21.93 | -95.53  | 1.21 | 0.78 | 7.72 | -999 |
| 4 | -22.31 | -95.27  | 1.28 | 0.75 | 6.03 | -999 |
| 4 | -22.58 | -95.08  | 1.66 | 0.78 | 7.31 | -999 |

|   |        |        |       |      |       |      |
|---|--------|--------|-------|------|-------|------|
| 4 | -22.96 | -94.82 | 1.25  | 0.95 | 6.92  | -999 |
| 4 | -23.23 | -94.63 | 1.27  | 0.81 | 7.02  | -999 |
| 4 | -23.61 | -94.36 | 1.23  | 0.94 | 6.70  | -999 |
| 4 | -23.87 | -94.17 | 1.08  | 0.72 | 6.68  | -999 |
| 4 | -24.25 | -93.89 | 1.13  | 1.02 | 8.13  | -999 |
| 4 | -24.52 | -93.69 | 1.07  | 0.82 | 5.26  | -999 |
| 4 | -24.90 | -93.42 | 0.99  | 0.89 | 6.25  | -999 |
| 4 | -25.17 | -93.23 | 1.13  | 0.81 | 6.50  | -999 |
| 4 | -25.60 | -92.94 | 0.94  | 0.74 | 8.08  | -999 |
| 4 | -25.86 | -92.75 | 1.22  | 0.94 | 9.84  | -999 |
| 4 | -26.24 | -92.47 | 1.20  | 1.12 | 6.57  | -999 |
| 4 | -26.54 | -92.26 | 1.05  | 0.84 | 6.46  | -999 |
| 4 | -26.81 | -92.06 | 1.14  | 0.84 | 6.94  | -999 |
| 4 | -26.97 | -91.94 | 1.15  | 0.89 | 7.71  | -999 |
| 4 | -27.25 | -91.74 | 1.31  | 0.81 | 8.03  | -999 |
| 4 | -27.63 | -91.47 | 1.36  | 0.80 | 10.19 | -999 |
| 4 | -27.90 | -91.28 | 1.57  | 0.82 | 7.23  | -999 |
| 4 | -28.28 | -91.00 | 1.67  | 1.05 | 7.72  | -999 |
| 4 | -28.55 | -90.80 | 1.15  | 0.88 | 8.24  | -999 |
| 4 | -28.93 | -90.52 | 1.44  | 1.02 | 8.79  | -999 |
| 4 | -29.21 | -90.31 | 1.47  | 0.86 | 8.34  | -999 |
| 4 | -29.61 | -90.02 | 1.23  | 0.99 | 7.96  | -999 |
| 4 | -29.89 | -89.81 | 1.17  | 0.85 | 8.60  | -999 |
| 4 | -30.25 | -89.43 | 1.11  | 0.95 | 9.97  | -999 |
| 4 | -31.41 | -87.95 | 1.42  | 0.82 | 7.83  | -999 |
| 4 | -31.64 | -87.67 | 1.78  | 0.93 | 6.58  | -999 |
| 4 | -31.95 | -87.25 | 1.82  | 1.11 | 9.70  | -999 |
| 4 | -32.18 | -86.96 | 1.80  | 0.94 | -999  | -999 |
| 4 | -32.51 | -86.55 | 13.07 | 1.68 | 10.13 | -999 |
| 4 | -33.06 | -85.82 | 3.72  | 1.18 | 7.35  | -999 |
| 4 | -33.29 | -85.51 | 7.03  | 1.32 | 7.66  | -999 |
| 4 | -33.50 | -85.22 | 3.33  | 1.49 | 9.74  | -999 |
| 4 | -33.73 | -84.93 | 4.09  | 1.41 | 8.71  | -999 |
| 4 | -34.06 | -84.51 | 3.64  | 1.22 | 5.96  | -999 |
| 4 | -34.29 | -84.20 | 3.89  | 1.37 | 6.26  | -999 |
| 4 | -34.60 | -83.76 | 6.70  | 2.17 | 14.01 | -999 |
| 4 | -34.84 | -83.47 | 6.80  | 1.78 | 12.56 | -999 |
| 4 | -35.16 | -83.04 | 3.97  | 1.35 | 7.73  | -999 |
| 4 | -35.39 | -82.74 | 3.74  | 1.29 | 7.46  | -999 |
| 4 | -35.80 | -82.18 | 5.37  | 1.29 | 5.89  | -999 |
| 4 | -36.02 | -81.87 | 4.59  | 1.38 | 6.18  | -999 |
| 4 | -36.59 | -81.13 | 2.30  | 1.21 | 8.00  | -999 |
| 4 | -36.91 | -80.69 | 2.57  | 1.69 | 5.78  | -999 |
| 4 | -37.14 | -80.36 | 2.71  | 1.38 | 4.99  | -999 |
| 4 | -37.48 | -79.90 | 2.35  | 1.28 | 4.26  | -999 |
| 4 | -37.70 | -79.60 | 2.55  | 1.41 | 3.85  | -999 |
| 4 | -38.03 | -79.14 | 3.22  | 1.97 | 5.40  | -999 |

|   |        |        |       |       |       |      |
|---|--------|--------|-------|-------|-------|------|
| 4 | -38.59 | -78.36 | 10.06 | 1.68  | 9.96  | -999 |
| 4 | -39.19 | -77.53 | 4.02  | 1.75  | 9.16  | -999 |
| 4 | -39.42 | -77.20 | 4.03  | 1.63  | 11.02 | -999 |
| 4 | -39.74 | -76.75 | 3.24  | 1.79  | 9.69  | -999 |
| 4 | -39.98 | -76.40 | 2.79  | 1.41  | 15.29 | -999 |
| 4 | -40.34 | -75.88 | 3.91  | 2.04  | 15.98 | -999 |
| 4 | -40.57 | -75.55 | 3.77  | 1.90  | 21.69 | -999 |
| 4 | -40.90 | -75.09 | 5.08  | 2.12  | 10.77 | -999 |
| 4 | -41.14 | -74.79 | 16.36 | 4.75  | 9.52  | -999 |
| 4 | -41.45 | -74.31 | 34.24 | 9.03  | 7.58  | -999 |
| 4 | -42.24 | -73.32 | 54.15 | 24.47 | 9.16  | -999 |
| 4 | -42.58 | -73.19 | 67.74 | 25.85 | 8.74  | -999 |
| 4 | -43.05 | -73.25 | 46.90 | 15.44 | 6.52  | -999 |
| 4 | -43.40 | -73.29 | -999  | -999  | -999  | -999 |
| 4 | -43.74 | -73.34 | 25.45 | 9.86  | 7.93  | -999 |
| 4 | -44.09 | -73.40 | 28.66 | 15.45 | 6.00  | -999 |
| 4 | -44.66 | -73.49 | 24.54 | 13.41 | 3.31  | -999 |
| 4 | -45.44 | -73.82 | 31.56 | 20.07 | 3.33  | -999 |
| 4 | -45.44 | -74.28 | -999  | 22.36 | 5.69  | 4.00 |
| 4 | -45.51 | -74.88 | -999  | 13.78 | 7.36  | -999 |
| 4 | -45.89 | -75.24 | 20.65 | 7.45  | 8.42  | -999 |
| 4 | -46.15 | -75.49 | 16.40 | 6.16  | 8.62  | -999 |
| 4 | -46.55 | -75.77 | 18.01 | 7.89  | 5.41  | -999 |
| 4 | -46.88 | -75.80 | -999  | 2.44  | 5.39  | -999 |
| 4 | -47.83 | -74.74 | 34.36 | 15.20 | 3.29  | -999 |
| 4 | -48.16 | -74.60 | 28.99 | 11.68 | 2.41  | -999 |
| 4 | -48.64 | -74.41 | 22.63 | 7.35  | 1.90  | -999 |
| 4 | -48.99 | -74.42 | 42.36 | 12.12 | 2.74  | -999 |
| 4 | -49.50 | -74.45 | 89.97 | 18.12 | 4.18  | -999 |
| 4 | -49.85 | -74.36 | 60.76 | 12.05 | 3.29  | -999 |
| 4 | -51.09 | -74.20 | 57.84 | 10.31 | 3.55  | -999 |
| 4 | -51.46 | -74.05 | 63.86 | 9.99  | 2.31  | -999 |
| 4 | -51.90 | -73.67 | 55.93 | 9.85  | 2.19  | -999 |
| 4 | -52.23 | -73.62 | 65.28 | 12.23 | 2.66  | -999 |
| 4 | -52.64 | -73.70 | 91.14 | 17.50 | 4.32  | -999 |
| 4 | -52.94 | -73.90 | 64.48 | 14.72 | 5.80  | -999 |
| 4 | -53.26 | -73.24 | 61.28 | 15.83 | 5.16  | -999 |
| 4 | -53.49 | -72.72 | 61.61 | 15.41 | 4.84  | -999 |
| 4 | -53.78 | -71.92 | 58.62 | 19.25 | 3.46  | -999 |
| 4 | -53.91 | -71.32 | 61.24 | 19.85 | 3.86  | -999 |
| 4 | -53.54 | -70.85 | 48.04 | 15.57 | 4.33  | -999 |
| 4 | -53.19 | -70.85 | 49.90 | 15.23 | 3.43  | -999 |
| 5 | 48.70  | -9.00  | 2.08  | 2.66  | 2.07  | -999 |
| 5 | 48.59  | -9.41  | 2.00  | 2.73  | 2.37  | -999 |
| 5 | 48.48  | -9.83  | 1.98  | 2.74  | 2.07  | -999 |
| 5 | 48.24  | -10.17 | 1.90  | 2.75  | 2.37  | -999 |
| 5 | 48.00  | -10.51 | 1.83  | 2.55  | 2.48  | -999 |

|   |       |        |      |      |      |      |
|---|-------|--------|------|------|------|------|
| 5 | 47.76 | -10.87 | 1.82 | 2.46 | 2.34 | -999 |
| 5 | 47.53 | -11.24 | 1.77 | 2.61 | 2.48 | -999 |
| 5 | 47.29 | -11.59 | 1.74 | 2.39 | 2.48 | -999 |
| 5 | 47.07 | -11.96 | 1.69 | 2.10 | 2.05 | -999 |
| 5 | 46.83 | -12.31 | 1.60 | 2.25 | 2.16 | -999 |
| 5 | 46.62 | -12.63 | 1.63 | 2.21 | 2.55 | -999 |
| 5 | 46.42 | -12.93 | 1.61 | 1.89 | 1.84 | -999 |
| 5 | 46.19 | -13.28 | 1.54 | 1.68 | 2.30 | -999 |
| 5 | 45.98 | -13.61 | 1.40 | 2.00 | 2.17 | -999 |
| 5 | 45.75 | -13.92 | 1.55 | 1.87 | 2.28 | -999 |
| 5 | 45.39 | -14.43 | -999 | -999 | 2.85 | -999 |
| 5 | 45.22 | -14.69 | 1.42 | 1.79 | 2.98 | -999 |
| 5 | 45.13 | -14.82 | 1.44 | 1.54 | 5.39 | -999 |
| 5 | 45.01 | -14.97 | 1.60 | 2.02 | 2.29 | -999 |
| 5 | 44.91 | -15.15 | 1.59 | 2.14 | 2.40 | -999 |
| 5 | 44.84 | -15.32 | 1.67 | 1.86 | 2.72 | -999 |
| 5 | 44.75 | -15.52 | 1.60 | 1.99 | 2.39 | -999 |
| 5 | 44.81 | -15.68 | 1.54 | 1.79 | 2.65 | -999 |
| 5 | 44.80 | -15.87 | 1.56 | 2.44 | 2.83 | -999 |
| 5 | 44.78 | -16.07 | 1.55 | 2.07 | 3.60 | -999 |
| 5 | 44.78 | -16.29 | 1.43 | 2.26 | 2.85 | -999 |
| 5 | 44.60 | -16.56 | 1.50 | 2.11 | 3.57 | -999 |
| 5 | 44.46 | -16.89 | 1.41 | 2.27 | 3.26 | -999 |
| 5 | 44.30 | -17.21 | 1.30 | 1.87 | 3.10 | -999 |
| 5 | 44.13 | -17.54 | 1.32 | 2.05 | 3.13 | -999 |
| 5 | 43.95 | -17.78 | 1.48 | 2.04 | 3.13 | -999 |
| 5 | 43.65 | -18.10 | -999 | -999 | 3.10 | -999 |
| 5 | 43.33 | -18.36 | 1.24 | 1.89 | 3.14 | -999 |
| 5 | 43.06 | -18.64 | 1.30 | 1.78 | 3.45 | -999 |
| 5 | 42.78 | -18.91 | 1.30 | 1.80 | 4.43 | -999 |
| 5 | 42.50 | -19.17 | 1.28 | 1.83 | 4.11 | -999 |
| 5 | 42.22 | -19.43 | 1.28 | 1.60 | 4.01 | -999 |
| 5 | 42.00 | -19.63 | 1.26 | 1.98 | 3.52 | -999 |
| 5 | 41.71 | -19.88 | 1.19 | 1.94 | 3.99 | -999 |
| 5 | 41.43 | -20.14 | 1.18 | 1.86 | 3.57 | -999 |
| 5 | 41.19 | -20.26 | 1.10 | 1.69 | 3.60 | -999 |
| 5 | 41.24 | -20.23 | 1.19 | 1.88 | 4.60 | -999 |
| 5 | 41.18 | -20.22 | 1.82 | 1.87 | 4.25 | -999 |
| 5 | 41.18 | -20.24 | 1.37 | 1.72 | 4.39 | -999 |
| 5 | 40.96 | -20.55 | 1.35 | 1.67 | 4.74 | -999 |
| 5 | 40.73 | -20.88 | 1.31 | 1.86 | 4.69 | -999 |
| 5 | 40.50 | -21.22 | 1.41 | 2.50 | 4.27 | -999 |
| 5 | 40.10 | -21.79 | 1.29 | 2.32 | 3.53 | -999 |
| 5 | 39.86 | -22.15 | 1.24 | 1.85 | 2.91 | -999 |
| 5 | 39.61 | -22.48 | 1.28 | 2.04 | 3.19 | -999 |
| 5 | 39.36 | -22.83 | 1.13 | 1.88 | 3.92 | -999 |
| 5 | 39.13 | -23.17 | 1.33 | 2.26 | 4.34 | -999 |

|   |       |        |      |      |      |      |
|---|-------|--------|------|------|------|------|
| 5 | 38.88 | -23.51 | 1.46 | 3.36 | 3.78 | -999 |
| 5 | 38.63 | -23.88 | 1.99 | 4.24 | 2.59 | -999 |
| 5 | 38.40 | -24.19 | 1.43 | 2.73 | 2.95 | -999 |
| 5 | 38.16 | -24.53 | 1.76 | 3.22 | 3.06 | -999 |
| 5 | 37.92 | -24.87 | 1.36 | 2.69 | 2.91 | -999 |
| 5 | 37.69 | -25.22 | 4.78 | 8.05 | 2.67 | -999 |
| 5 | 37.72 | -25.63 | 2.49 | 3.80 | 2.47 | -999 |
| 5 | 37.73 | -25.66 | 3.62 | 6.51 | 2.89 | -999 |
| 5 | 37.40 | -25.72 | 2.41 | 3.42 | 2.78 | -999 |
| 5 | 37.14 | -25.75 | -999 | -999 | 3.01 | -999 |
| 5 | 37.05 | -25.77 | 2.29 | 4.35 | 2.14 | -999 |
| 5 | 36.05 | -25.99 | 1.37 | 2.34 | -999 | -999 |
| 5 | 35.69 | -26.05 | 1.38 | 2.72 | 2.87 | -999 |
| 5 | 35.33 | -26.13 | 0.93 | 1.22 | 3.24 | -999 |
| 5 | 34.97 | -26.20 | 0.83 | 1.29 | 3.41 | -999 |
| 5 | 34.62 | -26.27 | 0.91 | 1.39 | 2.46 | -999 |
| 5 | 34.30 | -26.35 | 0.82 | 1.25 | 3.01 | -999 |
| 5 | 33.94 | -26.41 | 0.82 | 1.42 | 2.74 | -999 |
| 5 | 33.58 | -26.48 | -999 | 1.29 | 3.34 | -999 |
| 5 | 33.22 | -26.53 | 0.81 | 1.26 | 3.55 | -999 |
| 5 | 32.86 | -26.60 | 0.83 | 1.13 | 3.00 | -999 |
| 5 | 32.51 | -26.68 | 0.81 | 1.09 | 4.43 | -999 |
| 5 | 32.22 | -26.75 | 0.91 | 1.14 | 3.96 | -999 |
| 5 | 31.87 | -26.81 | 0.88 | 1.24 | 3.99 | -999 |
| 5 | 31.52 | -26.85 | -999 | 0.86 | 4.19 | -999 |
| 5 | 31.17 | -26.93 | 0.88 | 0.95 | 3.99 | -999 |
| 5 | 30.81 | -27.00 | 0.94 | 0.82 | 4.30 | -999 |
| 5 | 30.25 | -27.11 | 0.96 | 1.09 | 4.84 | -999 |
| 5 | 29.89 | -27.17 | 0.97 | 1.15 | 5.77 | -999 |
| 5 | 29.52 | -27.24 | 0.93 | 1.13 | 5.90 | -999 |
| 5 | 29.16 | -27.31 | 0.98 | 0.56 | 6.15 | -999 |
| 5 | 28.80 | -27.38 | 0.97 | 0.92 | 5.98 | -999 |
| 5 | 28.44 | -27.44 | 0.95 | 1.24 | 6.20 | -999 |
| 5 | 28.11 | -27.50 | 0.92 | 1.14 | 5.19 | -999 |
| 5 | 27.76 | -27.56 | 0.97 | 1.25 | 5.42 | -999 |
| 5 | 27.39 | -27.62 | 0.97 | 0.78 | 5.83 | -999 |
| 5 | 27.04 | -27.70 | 1.08 | 0.92 | 5.63 | -999 |
| 5 | 26.69 | -27.75 | 1.03 | 0.97 | 5.34 | -999 |
| 5 | 26.41 | -27.81 | 0.97 | 1.10 | 5.58 | -999 |
| 5 | 26.05 | -27.88 | 0.93 | 0.83 | 5.35 | -999 |
| 5 | 25.68 | -27.94 | 0.80 | 0.88 | 4.13 | -999 |
| 5 | 25.34 | -28.00 | 0.83 | 0.94 | 4.31 | -999 |
| 5 | 25.33 | -28.00 | 0.87 | 0.94 | 5.50 | -999 |
| 5 | 24.62 | -28.00 | 0.71 | 0.95 | 4.86 | -999 |
| 5 | 24.26 | -28.00 | 0.72 | 0.99 | 4.85 | -999 |
| 5 | 23.89 | -28.00 | 0.68 | 0.85 | 5.93 | -999 |
| 5 | 23.53 | -28.01 | 0.78 | 0.93 | 6.56 | -999 |

|   |       |        |      |      |      |      |
|---|-------|--------|------|------|------|------|
| 5 | 23.16 | -28.00 | 0.78 | 0.83 | 6.21 | -999 |
| 5 | 22.84 | -28.00 | 0.78 | 0.82 | 6.70 | -999 |
| 5 | 22.48 | -28.00 | 0.76 | 1.07 | 6.85 | -999 |
| 5 | 22.12 | -28.00 | 0.77 | 0.93 | 7.66 | -999 |
| 5 | 21.75 | -28.00 | 0.77 | 0.88 | 5.90 | -999 |
| 5 | 21.39 | -28.00 | 0.75 | 0.97 | 6.69 | -999 |
| 5 | 21.02 | -28.01 | 0.76 | 0.98 | 6.70 | -999 |
| 5 | 20.68 | -28.04 | 0.79 | 1.00 | 4.61 | -999 |
| 5 | 20.32 | -28.14 | 0.77 | 0.96 | -999 | -999 |
| 5 | 19.97 | -28.23 | 0.78 | 0.97 | 4.94 | -999 |
| 5 | 19.26 | -28.41 | 0.76 | 1.03 | 4.91 | -999 |
| 5 | 18.90 | -28.51 | 0.76 | 0.91 | 4.64 | -999 |
| 5 | 18.55 | -28.60 | 0.72 | 0.90 | 4.87 | -999 |
| 5 | 18.20 | -28.69 | 0.75 | 1.03 | 4.46 | -999 |
| 5 | 17.84 | -28.79 | 0.77 | 1.03 | 4.11 | -999 |
| 5 | 17.51 | -28.86 | 0.79 | 1.16 | 4.65 | -999 |
| 5 | 17.18 | -28.95 | 0.77 | 1.18 | 4.85 | -999 |
| 5 | 16.83 | -28.96 | 0.75 | 1.05 | 4.92 | -999 |
| 5 | 16.48 | -28.90 | 0.83 | 1.12 | 4.83 | -999 |
| 5 | 16.14 | -28.82 | 0.85 | 1.05 | 4.80 | -999 |
| 5 | 15.43 | -28.67 | 0.74 | 1.10 | 5.63 | -999 |
| 5 | 15.08 | -28.60 | 0.90 | 0.83 | 6.31 | -999 |
| 5 | 14.74 | -28.53 | 0.95 | 1.05 | 5.60 | -999 |
| 5 | 14.39 | -28.46 | 0.96 | 1.33 | 5.77 | -999 |
| 5 | 13.62 | -28.30 | 0.97 | 1.30 | 6.41 | -999 |
| 5 | 13.27 | -28.23 | 0.88 | 1.14 | 6.82 | -999 |
| 5 | 12.93 | -28.16 | 0.83 | 1.14 | 6.17 | -999 |
| 5 | 12.58 | -28.09 | 0.96 | 1.26 | 5.64 | -999 |
| 5 | 12.23 | -28.02 | 1.00 | 1.21 | 5.23 | -999 |
| 5 | 12.17 | -28.01 | 1.05 | 1.25 | 5.14 | -999 |
| 5 | 12.17 | -28.01 | 1.22 | 1.22 | 3.86 | -999 |
| 5 | 12.01 | -28.01 | 1.06 | 1.21 | 4.61 | -999 |
| 5 | 11.66 | -28.00 | 0.91 | 0.90 | 4.63 | -999 |
| 5 | 11.30 | -28.00 | 0.78 | 0.96 | 4.75 | -999 |
| 5 | 10.96 | -28.00 | 0.78 | 0.93 | 3.84 | -999 |
| 5 | 10.67 | -28.00 | 0.74 | 0.84 | 4.29 | -999 |
| 5 | 10.32 | -28.00 | 0.69 | 0.92 | 4.95 | -999 |
| 5 | 9.87  | -28.00 | 0.73 | 0.92 | 5.40 | -999 |
| 5 | 9.50  | -28.00 | 0.75 | 0.81 | 5.62 | -999 |
| 5 | 8.96  | -28.00 | 0.51 | 0.86 | 4.79 | -999 |
| 5 | 8.61  | -28.00 | 0.69 | 1.03 | 5.75 | -999 |
| 5 | 8.27  | -28.00 | 0.70 | 0.99 | 5.23 | -999 |
| 5 | 7.91  | -28.00 | 0.78 | 1.00 | 4.64 | -999 |
| 5 | 7.56  | -28.00 | 0.75 | 0.85 | 4.84 | -999 |
| 5 | 7.21  | -28.00 | 0.80 | 1.01 | 4.70 | -999 |
| 5 | 7.00  | -28.00 | 0.90 | 1.13 | 5.45 | -999 |
| 5 | 7.06  | -27.84 | 0.81 | 1.04 | 5.86 | -999 |

|   |       |        |      |      |      |      |
|---|-------|--------|------|------|------|------|
| 5 | 7.25  | -27.76 | 0.73 | 0.87 | 5.92 | -999 |
| 5 | 7.17  | -27.88 | 0.80 | 1.07 | 5.86 | -999 |
| 5 | 7.12  | -27.77 | 0.74 | 1.00 | 4.47 | -999 |
| 5 | 7.08  | -27.87 | 0.78 | 1.08 | 6.00 | -999 |
| 5 | 7.04  | -27.67 | 0.76 | 0.99 | 5.21 | -999 |
| 5 | 6.91  | -27.43 | 0.76 | 0.99 | 6.08 | -999 |
| 5 | 6.78  | -27.22 | 0.77 | 0.94 | 5.43 | -999 |
| 5 | 6.82  | -27.07 | 0.76 | 0.89 | 5.61 | -999 |
| 5 | 6.91  | -26.83 | 0.80 | 1.00 | 4.48 | -999 |
| 5 | 6.78  | -26.64 | 0.75 | 0.77 | 4.30 | -999 |
| 5 | 6.75  | -26.40 | 0.81 | 1.03 | 4.63 | -999 |
| 5 | 6.74  | -26.25 | 0.78 | 0.94 | 4.05 | -999 |
| 5 | 6.74  | -26.10 | 0.76 | 0.94 | 4.04 | -999 |
| 5 | 6.74  | -26.00 | 0.73 | 0.92 | 4.44 | -999 |
| 5 | 6.46  | -25.93 | 0.79 | 1.01 | 4.22 | -999 |
| 5 | 6.15  | -25.87 | 0.78 | 0.87 | 4.83 | -999 |
| 5 | 5.84  | -25.80 | 0.78 | 0.78 | 5.08 | -999 |
| 5 | 5.57  | -25.89 | 0.80 | 0.61 | 5.34 | -999 |
| 5 | 5.30  | -25.79 | 0.80 | 0.67 | 3.82 | -999 |
| 5 | 4.97  | -25.63 | 0.67 | 0.79 | 3.65 | -999 |
| 5 | 4.83  | -25.41 | 0.70 | 0.83 | 3.86 | -999 |
| 5 | 4.50  | -25.40 | 0.83 | 0.87 | 3.30 | -999 |
| 5 | 4.18  | -25.35 | 0.91 | 0.85 | 3.39 | -999 |
| 5 | 3.86  | -25.28 | 0.87 | 0.94 | 3.96 | -999 |
| 5 | 3.31  | -25.21 | 0.77 | 0.83 | 4.76 | -999 |
| 5 | 2.97  | -25.15 | 0.81 | 0.98 | 5.31 | -999 |
| 5 | 2.63  | -25.10 | 1.00 | 1.02 | 4.76 | -999 |
| 5 | 2.29  | -25.05 | 0.86 | 1.09 | 4.52 | -999 |
| 5 | 2.01  | -25.00 | 0.93 | 1.35 | 4.35 | -999 |
| 5 | 2.01  | -25.01 | 1.40 | 1.27 | 4.33 | -999 |
| 5 | 2.00  | -25.00 | 1.07 | 1.16 | 4.46 | -999 |
| 5 | 1.78  | -25.00 | 0.96 | 1.45 | 4.68 | -999 |
| 5 | 1.53  | -25.00 | 0.79 | 1.15 | 4.14 | -999 |
| 5 | 1.30  | -25.00 | 0.62 | 1.10 | 4.17 | -999 |
| 5 | 1.03  | -25.00 | 0.94 | 1.35 | 3.99 | -999 |
| 5 | 0.83  | -25.00 | 0.98 | 1.46 | 4.75 | -999 |
| 5 | 0.55  | -25.00 | 2.02 | 1.38 | 5.30 | -999 |
| 5 | 0.35  | -25.00 | 1.36 | 1.54 | 4.93 | -999 |
| 5 | 0.07  | -25.00 | 1.37 | 1.81 | 4.67 | -999 |
| 5 | -0.01 | -25.00 | 1.48 | 1.87 | 5.16 | -999 |
| 5 | -0.40 | -25.00 | 1.66 | 2.26 | 4.65 | -999 |
| 5 | -0.62 | -25.00 | 1.75 | 2.37 | 4.43 | -999 |
| 5 | -0.90 | -25.00 | 1.42 | 2.54 | 6.08 | -999 |
| 5 | -1.11 | -25.00 | 1.43 | 2.19 | 5.94 | -999 |
| 5 | -1.39 | -25.00 | 1.32 | 1.92 | 4.45 | -999 |
| 5 | -1.64 | -25.00 | 1.40 | 2.05 | 4.24 | -999 |
| 5 | -1.94 | -25.00 | 1.23 | 1.90 | 4.94 | -999 |



|   |        |        |      |      |      |      |
|---|--------|--------|------|------|------|------|
| 5 | -2.00  | -25.00 | 1.18 | 1.88 | 3.88 | -999 |
| 5 | -2.11  | -25.05 | 0.83 | 1.67 | 4.11 | -999 |
| 5 | -2.39  | -25.19 | -999 | -999 | 4.27 | -999 |
| 5 | -2.68  | -25.32 | 0.84 | 1.47 | 3.65 | -999 |
| 5 | -2.96  | -25.46 | 0.87 | 1.35 | 5.10 | -999 |
| 5 | -3.20  | -25.57 | 0.83 | 1.33 | 5.07 | -999 |
| 5 | -3.46  | -25.71 | 0.85 | 1.13 | 5.22 | -999 |
| 5 | -4.00  | -25.95 | 0.95 | 1.37 | 5.55 | -999 |
| 5 | -4.00  | -25.96 | 0.94 | 1.38 | 4.24 | -999 |
| 5 | -4.25  | -26.07 | 0.93 | 1.35 | 4.63 | -999 |
| 5 | -4.53  | -26.21 | 1.02 | 1.28 | 4.57 | -999 |
| 5 | -4.80  | -26.35 | 1.05 | 1.38 | 4.80 | -999 |
| 5 | -5.03  | -26.45 | 1.00 | 1.45 | 3.02 | -999 |
| 5 | -5.29  | -26.58 | 1.00 | 1.26 | 3.40 | -999 |
| 5 | -5.56  | -26.71 | 0.88 | 1.22 | 3.11 | -999 |
| 5 | -5.83  | -26.84 | 0.83 | 1.35 | 3.80 | -999 |
| 5 | -6.00  | -26.92 | 0.92 | 1.29 | 3.77 | -999 |
| 5 | -6.05  | -26.95 | 0.93 | 1.15 | 4.08 | -999 |
| 5 | -6.32  | -27.08 | 0.91 | 1.20 | 4.12 | -999 |
| 5 | -6.60  | -27.21 | 0.86 | 1.07 | 3.99 | -999 |
| 5 | -6.88  | -27.35 | 0.93 | 1.00 | 3.47 | -999 |
| 5 | -7.11  | -27.46 | 0.92 | 1.04 | 4.39 | -999 |
| 5 | -7.40  | -27.60 | 0.92 | 0.95 | 4.13 | -999 |
| 5 | -7.83  | -27.81 | 0.98 | 0.91 | 4.50 | -999 |
| 5 | -8.00  | -27.89 | 0.99 | 1.09 | 4.09 | -999 |
| 5 | -8.02  | -27.90 | 0.99 | 1.08 | 4.83 | -999 |
| 5 | -8.30  | -28.03 | 1.04 | 1.01 | 5.08 | -999 |
| 5 | -8.58  | -28.17 | 1.02 | 0.91 | 5.13 | -999 |
| 5 | -8.86  | -28.30 | 1.00 | 0.87 | 5.42 | -999 |
| 5 | -9.15  | -28.44 | 1.05 | 0.97 | 5.43 | -999 |
| 5 | -9.38  | -28.60 | 1.02 | 0.88 | 4.91 | -999 |
| 5 | -9.50  | -28.64 | 0.99 | 0.90 | 5.46 | -999 |
| 5 | -9.51  | -28.50 | 0.71 | 0.91 | 5.09 | -999 |
| 5 | -9.50  | -28.49 | 0.67 | 0.78 | 4.99 | -999 |
| 5 | -9.55  | -28.31 | 1.19 | 0.93 | 4.81 | -999 |
| 5 | -9.74  | -28.51 | 1.10 | 0.80 | 4.84 | -999 |
| 5 | -10.00 | -28.64 | 0.97 | 0.84 | 5.45 | -999 |
| 5 | -10.27 | -28.80 | 0.89 | 0.75 | 5.47 | -999 |
| 5 | -10.69 | -29.04 | 0.95 | 0.89 | 5.06 | -999 |
| 5 | -10.97 | -29.21 | 0.67 | 0.73 | 3.85 | -999 |
| 5 | -11.01 | -29.23 | 0.90 | 0.87 | 4.84 | -999 |
| 5 | -11.15 | -29.30 | 0.77 | 0.84 | 4.47 | -999 |
| 5 | -11.43 | -29.48 | 0.77 | 0.81 | 4.56 | -999 |
| 5 | -11.72 | -29.65 | 0.75 | 0.87 | 4.66 | -999 |
| 5 | -12.00 | -29.81 | 0.72 | 0.79 | 4.34 | -999 |
| 5 | -12.24 | -29.96 | 0.67 | 0.84 | 5.27 | -999 |
| 5 | -12.51 | -30.11 | 0.70 | 0.83 | 5.77 | -999 |

|   |        |        |      |      |      |      |
|---|--------|--------|------|------|------|------|
| 5 | -12.76 | -30.26 | 0.66 | 0.77 | 4.90 | -999 |
| 5 | -13.00 | -30.40 | 0.58 | 0.71 | 4.83 | -999 |
| 5 | -13.01 | -30.39 | 0.60 | 0.75 | 5.35 | -999 |
| 5 | -13.23 | -30.53 | 0.64 | 0.82 | 4.13 | -999 |
| 5 | -13.48 | -30.68 | 0.63 | 0.91 | 4.55 | -999 |
| 5 | -13.74 | -30.83 | 0.69 | 0.79 | 4.87 | -999 |
| 5 | -14.00 | -30.99 | 0.67 | 0.85 | 4.82 | -999 |
| 5 | -14.18 | -31.16 | 0.65 | 0.71 | 4.41 | -999 |
| 5 | -14.25 | -31.08 | 0.65 | 0.89 | 5.26 | -999 |
| 5 | -14.25 | -31.00 | 0.76 | 0.81 | 5.69 | -999 |
| 5 | -14.25 | -30.96 | 0.67 | 0.93 | 5.57 | -999 |
| 5 | -14.29 | -30.81 | 0.70 | 0.87 | 5.31 | -999 |
| 5 | -14.48 | -31.00 | 0.71 | 0.94 | 5.22 | -999 |
| 5 | -14.72 | -31.09 | 0.70 | 0.84 | 5.75 | -999 |
| 5 | -14.97 | -31.19 | 0.72 | 0.79 | 5.85 | -999 |
| 5 | -15.20 | -31.28 | 0.70 | 0.79 | 4.75 | -999 |
| 5 | -15.47 | -31.38 | 0.70 | 0.74 | 3.50 | -999 |
| 5 | -15.74 | -31.48 | 0.71 | 0.65 | 4.42 | -999 |
| 5 | -16.00 | -31.60 | 0.70 | 0.80 | 3.86 | -999 |
| 5 | -16.00 | -31.59 | 0.70 | 0.74 | 4.20 | -999 |
| 5 | -16.21 | -31.68 | 0.66 | 0.78 | 4.09 | -999 |
| 5 | -16.49 | -31.79 | 0.65 | 0.77 | 4.10 | -999 |
| 5 | -16.90 | -31.95 | 0.71 | 0.78 | 4.57 | -999 |
| 5 | -17.10 | -32.03 | 0.65 | 0.68 | 4.52 | -999 |
| 5 | -17.37 | -32.14 | 0.67 | 0.77 | 4.55 | -999 |
| 5 | -17.64 | -32.25 | 0.64 | 0.74 | 3.90 | -999 |
| 5 | -17.91 | -32.36 | 0.60 | 0.84 | 4.17 | -999 |
| 5 | -18.01 | -32.40 | 0.65 | 0.82 | 4.18 | -999 |
| 5 | -18.01 | -32.40 | 0.64 | 0.82 | 4.76 | -999 |
| 5 | -18.23 | -32.49 | 0.60 | 0.87 | 5.50 | -999 |
| 5 | -18.42 | -32.66 | -999 | 0.99 | 5.43 | -999 |
| 5 | -18.50 | -32.56 | 0.83 | 0.92 | 5.02 | -999 |
| 5 | -18.50 | -32.50 | 0.89 | 1.03 | 5.30 | -999 |
| 5 | -18.50 | -32.39 | 0.55 | 0.83 | 4.92 | -999 |
| 5 | -18.60 | -32.36 | 0.63 | 0.87 | 6.07 | -999 |
| 5 | -18.77 | -32.51 | 0.62 | 0.97 | 4.72 | -999 |
| 5 | -19.04 | -32.60 | 0.65 | 0.86 | 4.32 | -999 |
| 5 | -19.32 | -32.69 | 0.64 | 0.90 | 5.37 | -999 |
| 5 | -19.74 | -32.81 | 0.67 | 0.94 | 5.59 | -999 |
| 5 | -20.00 | -32.89 | 0.65 | 0.97 | 4.72 | -999 |
| 5 | -19.99 | -32.89 | 0.70 | 0.98 | 4.70 | -999 |
| 5 | -20.23 | -32.96 | 0.71 | 0.96 | 5.47 | -999 |
| 5 | -20.52 | -32.98 | 0.78 | 1.00 | 5.78 | -999 |
| 5 | -20.80 | -32.95 | 0.74 | 0.97 | 5.41 | -999 |
| 5 | -21.00 | -32.93 | 0.86 | 0.97 | 5.32 | -999 |
| 5 | -20.99 | -32.93 | 0.76 | 0.86 | 5.86 | -999 |
| 5 | -20.99 | -32.94 | 0.79 | 0.94 | 6.10 | -999 |

|   |        |        |      |      |      |      |
|---|--------|--------|------|------|------|------|
| 5 | -21.17 | -32.92 | 0.74 | 0.99 | 5.37 | -999 |
| 5 | -21.46 | -32.87 | 0.71 | 1.07 | 5.38 | -999 |
| 5 | -21.75 | -32.84 | 0.77 | 1.04 | 5.53 | -999 |
| 5 | -22.00 | -32.81 | 0.70 | 0.97 | 5.29 | -999 |
| 5 | -21.99 | -32.81 | 0.73 | 1.04 | 5.39 | -999 |
| 5 | -22.26 | -32.83 | 0.69 | 1.11 | 5.36 | -999 |
| 5 | -22.46 | -33.03 | 0.74 | 1.08 | 6.37 | -999 |
| 5 | -22.50 | -32.84 | 0.70 | 0.97 | 5.94 | -999 |
| 5 | -22.50 | -32.83 | 0.75 | 1.05 | 5.97 | -999 |
| 5 | -22.50 | -32.59 | 0.72 | 1.02 | 6.34 | -999 |
| 5 | -22.70 | -32.80 | 0.72 | 1.09 | 5.98 | -999 |
| 5 | -22.92 | -32.92 | 0.74 | 0.94 | 5.57 | -999 |
| 5 | -23.00 | -32.95 | 0.80 | 1.00 | 5.73 | -999 |
| 5 | -23.16 | -33.02 | 0.69 | 0.98 | 6.06 | -999 |
| 5 | -23.44 | -33.15 | 0.72 | 0.95 | 6.25 | -999 |
| 5 | -23.71 | -33.28 | 0.76 | 1.01 | 5.73 | -999 |
| 5 | -23.98 | -33.40 | 0.72 | 1.09 | 6.65 | -999 |
| 5 | -24.00 | -33.41 | 0.86 | 1.04 | 6.69 | -999 |
| 5 | -24.00 | -33.41 | -999 | -999 | 6.58 | -999 |
| 5 | -24.00 | -33.41 | -999 | -999 | 6.65 | -999 |
| 5 | -24.08 | -33.45 | 1.03 | 1.27 | -999 | -999 |
| 5 | -24.35 | -33.59 | 0.78 | 1.07 | -999 | -999 |
| 5 | -24.62 | -33.70 | 0.73 | 0.99 | 6.33 | -999 |
| 5 | -25.38 | -34.07 | 0.77 | 0.94 | 6.38 | -999 |
| 5 | -25.66 | -34.20 | 0.72 | 0.88 | 5.95 | -999 |
| 5 | -25.94 | -34.34 | 0.74 | 1.01 | 5.99 | -999 |
| 5 | -26.00 | -34.36 | 0.79 | 0.94 | 5.93 | -999 |
| 5 | -26.18 | -34.44 | 0.81 | 1.04 | 6.35 | -999 |
| 5 | -26.45 | -34.56 | 0.76 | 1.02 | 6.81 | -999 |
| 5 | -26.73 | -34.67 | 0.79 | 0.89 | 6.71 | -999 |
| 5 | -27.00 | -34.79 | 0.79 | 0.96 | 5.95 | -999 |
| 5 | -27.00 | -34.80 | 0.89 | 0.83 | 5.43 | -999 |
| 5 | -27.00 | -34.81 | 0.94 | 1.09 | 5.58 | -999 |
| 5 | -27.06 | -34.88 | 0.75 | 1.07 | 5.32 | -999 |
| 5 | -27.29 | -35.12 | 0.76 | 1.03 | 5.42 | -999 |
| 5 | -27.49 | -35.36 | 0.78 | 1.16 | 5.60 | -999 |
| 5 | -27.71 | -35.60 | 0.75 | 1.00 | 5.15 | -999 |
| 5 | -27.91 | -35.85 | 0.76 | 1.07 | 5.70 | -999 |
| 5 | -28.00 | -35.95 | 0.83 | 1.05 | 4.91 | -999 |
| 5 | -28.10 | -36.03 | 0.87 | 1.08 | 4.50 | -999 |
| 5 | -28.31 | -36.27 | 0.82 | 1.19 | 4.40 | -999 |
| 5 | -28.53 | -36.50 | 0.82 | 1.07 | 4.66 | -999 |
| 5 | -28.97 | -36.96 | 0.72 | 0.87 | 4.57 | -999 |
| 5 | -29.01 | -37.01 | 0.98 | 1.17 | 4.56 | -999 |
| 5 | -29.18 | -37.20 | 0.84 | 1.06 | 3.58 | -999 |
| 5 | -29.42 | -37.44 | 0.87 | 1.18 | 4.65 | -999 |
| 5 | -29.91 | -37.95 | 1.11 | 1.61 | 3.50 | -999 |

|   |        |        |      |      |      |      |
|---|--------|--------|------|------|------|------|
| 5 | -30.01 | -38.05 | 0.83 | 1.15 | 3.49 | -999 |
| 5 | -30.11 | -38.14 | 0.80 | 1.18 | 5.43 | -999 |
| 5 | -30.30 | -38.37 | 0.95 | 1.36 | 4.21 | -999 |
| 5 | -30.51 | -38.60 | 1.01 | 1.68 | 4.36 | -999 |
| 5 | -30.73 | -38.84 | 0.99 | 1.62 | 4.42 | -999 |
| 5 | -31.03 | -39.15 | -999 | -999 | 7.07 | -999 |
| 5 | -31.21 | -39.35 | 1.02 | 1.67 | 7.01 | -999 |
| 5 | -31.21 | -39.36 | 1.05 | 1.89 | -999 | -999 |
| 5 | -31.21 | -39.36 | 1.06 | 1.76 | 5.22 | -999 |
| 5 | -31.25 | -39.41 | 0.97 | 1.70 | 5.14 | -999 |
| 5 | -31.45 | -39.64 | 0.91 | 1.51 | 5.26 | -999 |
| 5 | -31.65 | -39.87 | 0.98 | 1.71 | 4.56 | -999 |
| 5 | -31.85 | -40.09 | 0.98 | 1.73 | 3.18 | -999 |
| 5 | -32.00 | -40.27 | 0.96 | 1.57 | 3.38 | -999 |
| 5 | -32.01 | -40.27 | 0.98 | 1.59 | 3.41 | -999 |
| 5 | -32.22 | -40.52 | 1.05 | 1.70 | 3.22 | -999 |
| 5 | -32.44 | -40.78 | 1.00 | 1.70 | 3.15 | -999 |
| 5 | -32.66 | -41.04 | 1.09 | 1.98 | 3.30 | -999 |
| 5 | -32.87 | -41.29 | 1.07 | 1.82 | 5.69 | -999 |
| 5 | -33.00 | -41.44 | 0.98 | 1.72 | 4.45 | -999 |
| 5 | -33.08 | -41.55 | 1.02 | 1.62 | 5.08 | -999 |
| 5 | -33.33 | -41.84 | 1.05 | 1.73 | 4.97 | -999 |
| 5 | -33.56 | -42.11 | 1.00 | 1.82 | 4.55 | -999 |
| 5 | -33.78 | -42.38 | 1.07 | 1.75 | 4.11 | -999 |
| 5 | -34.00 | -42.64 | 1.08 | 1.70 | 3.63 | -999 |
| 5 | -34.00 | -42.64 | 1.28 | 2.02 | 4.78 | -999 |
| 5 | -34.19 | -42.87 | 1.04 | 1.71 | 5.09 | -999 |
| 5 | -34.41 | -43.13 | 1.03 | 1.60 | 6.38 | -999 |
| 5 | -34.62 | -43.39 | 1.13 | 1.71 | 3.74 | -999 |
| 5 | -34.84 | -43.65 | 1.17 | 1.73 | 2.92 | -999 |
| 5 | -35.01 | -43.85 | 1.30 | 1.87 | 3.29 | -999 |
| 5 | -35.02 | -43.84 | 1.30 | 1.78 | 3.24 | -999 |
| 5 | -35.14 | -43.99 | 1.35 | 1.76 | 4.26 | -999 |
| 5 | -35.34 | -44.27 | 1.25 | 1.78 | 4.58 | -999 |
| 5 | -35.56 | -44.53 | 1.50 | 1.97 | 3.53 | -999 |
| 5 | -35.77 | -44.80 | 1.22 | 1.86 | 2.93 | -999 |
| 5 | -35.97 | -45.04 | 1.19 | 1.67 | 2.70 | -999 |
| 5 | -36.00 | -45.10 | 1.36 | 2.05 | 2.38 | -999 |
| 5 | -36.03 | -45.14 | 1.33 | 1.98 | 2.66 | -999 |
| 5 | -36.23 | -45.37 | 1.19 | 1.76 | 3.17 | -999 |
| 5 | -36.43 | -45.60 | 1.21 | 1.96 | 3.02 | -999 |
| 5 | -36.63 | -45.84 | 1.20 | 1.84 | 2.72 | -999 |
| 5 | -36.82 | -46.08 | 1.20 | 1.81 | 2.70 | -999 |
| 5 | -37.00 | -46.32 | 1.21 | 1.80 | 2.26 | -999 |
| 5 | -37.00 | -46.33 | 1.30 | 1.86 | 3.78 | -999 |
| 5 | -37.13 | -46.51 | 1.19 | 1.77 | 3.23 | -999 |
| 5 | -37.31 | -46.74 | 1.23 | 1.94 | 3.13 | -999 |

|   |        |        |      |      |      |      |
|---|--------|--------|------|------|------|------|
| 5 | -37.51 | -46.96 | 0.74 | 1.94 | 3.29 | -999 |
| 5 | -37.87 | -47.41 | 1.28 | 2.19 | 3.30 | -999 |
| 5 | -38.01 | -47.57 | 1.87 | 2.22 | 3.42 | -999 |
| 5 | -38.05 | -47.61 | 1.57 | 2.01 | 4.53 | -999 |
| 5 | -38.21 | -47.84 | 1.74 | 2.18 | 5.22 | -999 |
| 5 | -38.68 | -48.43 | 1.14 | 2.88 | 5.16 | -999 |
| 5 | -38.86 | -48.65 | 1.23 | 2.74 | 5.78 | -999 |
| 5 | -39.01 | -48.86 | 1.48 | 3.03 | 4.69 | -999 |
| 5 | -39.01 | -48.86 | 1.47 | 3.29 | 5.16 | -999 |
| 5 | -39.17 | -49.06 | 0.55 | 1.41 | 5.52 | -999 |
| 5 | -39.35 | -49.30 | 0.76 | 1.45 | 4.62 | -999 |
| 5 | -39.54 | -49.54 | 1.01 | 1.54 | 6.54 | -999 |
| 5 | -39.73 | -49.78 | 1.28 | 2.02 | 7.26 | -999 |
| 5 | -39.91 | -50.03 | 1.55 | 1.47 | 5.34 | -999 |
| 5 | -40.02 | -50.13 | 1.64 | 1.34 | 5.26 | -999 |
| 5 | -40.06 | -50.15 | 1.65 | 1.76 | 4.26 | -999 |
| 5 | -40.17 | -50.36 | 1.65 | 2.27 | 3.38 | -999 |
| 5 | -40.34 | -50.60 | 1.57 | 2.01 | 3.92 | -999 |
| 5 | -40.52 | -50.83 | 1.57 | 2.30 | 3.69 | -999 |
| 5 | -40.76 | -51.15 | 1.62 | 2.55 | 9.90 | -999 |
| 5 | -40.94 | -51.39 | 1.68 | 2.43 | 3.75 | -999 |
| 5 | -41.01 | -51.49 | 1.90 | 3.06 | 6.02 | -999 |
| 5 | -41.03 | -51.52 | 1.75 | 2.72 | 7.38 | -999 |
| 5 | -41.04 | -51.55 | 1.70 | 2.74 | 9.24 | -999 |
| 5 | -41.17 | -51.72 | 1.55 | 2.31 | 7.96 | -999 |
| 5 | -41.36 | -51.95 | 1.30 | 2.47 | 7.27 | -999 |
| 5 | -41.55 | -52.18 | 1.88 | 3.24 | 7.11 | -999 |
| 5 | -41.70 | -52.41 | 2.17 | 2.64 | 5.79 | -999 |
| 5 | -41.86 | -52.63 | 2.36 | 2.75 | 8.06 | -999 |
| 5 | -42.01 | -52.82 | 1.57 | 2.33 | 6.90 | -999 |
| 5 | -42.15 | -53.02 | 1.59 | 2.40 | 9.76 | -999 |
| 5 | -42.24 | -53.16 | 1.61 | 2.47 | 2.94 | -999 |
| 5 | -42.37 | -53.33 | 1.56 | 2.77 | 2.53 | -999 |
| 5 | -42.48 | -53.47 | 1.59 | 2.45 | 2.30 | -999 |
| 5 | -42.59 | -53.61 | 1.47 | 2.46 | 2.61 | -999 |
| 5 | -42.76 | -53.84 | 1.62 | 3.16 | 2.68 | -999 |
| 5 | -42.91 | -54.03 | 1.81 | 4.27 | 2.75 | -999 |
| 5 | -43.07 | -54.24 | 2.23 | 4.90 | 4.81 | -999 |
| 5 | -43.26 | -54.46 | 2.34 | 4.06 | 4.58 | -999 |
| 5 | -43.48 | -54.70 | 2.12 | 3.16 | 3.84 | -999 |
| 5 | -43.68 | -54.94 | 2.93 | 2.56 | 2.75 | -999 |
| 5 | -43.86 | -55.19 | 2.94 | 2.35 | 4.99 | -999 |
| 5 | -44.06 | -55.45 | 2.74 | 2.71 | 1.57 | -999 |
| 5 | -44.27 | -55.72 | 3.17 | 3.05 | 5.33 | -999 |
| 5 | -44.42 | -55.93 | 3.24 | 2.51 | 5.03 | -999 |
| 5 | -44.46 | -56.00 | 3.22 | 2.65 | 6.70 | -999 |
| 5 | -44.56 | -56.14 | 3.16 | 2.78 | 9.00 | -999 |

|       |        |         |      |      |       |      |
|-------|--------|---------|------|------|-------|------|
| 5     | -44.76 | -56.45  | 3.11 | 2.54 | 10.35 | -999 |
| 5     | -44.95 | -56.76  | 2.82 | 2.63 | 13.86 | -999 |
| 5     | -45.08 | -56.94  | 2.78 | 2.50 | 7.92  | -999 |
| 5     | -45.24 | -57.17  | 2.87 | 2.75 | 5.09  | -999 |
| 5     | -45.38 | -57.37  | 2.71 | 2.75 | 5.86  | -999 |
| 5     | -45.47 | -57.49  | 2.88 | 3.00 | 7.11  | -999 |
| 5     | -45.53 | -57.59  | 2.82 | 2.34 | 5.87  | -999 |
| 5     | -45.60 | -57.69  | 3.03 | 2.26 | 3.70  | -999 |
| 5     | -45.66 | -57.78  | 2.90 | 2.38 | 3.28  | -999 |
| 5     | -45.73 | -57.88  | 3.27 | 2.65 | 2.74  | -999 |
| 5     | -45.75 | -57.92  | 3.40 | 2.59 | 2.30  | -999 |
| 5     | -45.89 | -58.14  | 2.93 | 2.61 | 2.73  | -999 |
| 5     | -46.09 | -58.42  | 3.21 | 2.66 | 2.57  | -999 |
| 5     | -46.25 | -58.67  | 3.04 | 2.66 | 3.49  | -999 |
| 5     | -46.41 | -58.91  | 3.00 | 2.56 | 1.04  | -999 |
| 5     | -46.48 | -59.02  | 3.12 | 2.65 | 0.90  | -999 |
| 5     | -46.67 | -59.26  | 3.00 | 2.68 | 0.86  | -999 |
| 5     | -46.85 | -59.52  | 2.91 | 2.29 | 1.81  | -999 |
| 5     | -47.04 | -59.78  | 2.86 | 2.40 | 1.07  | -999 |
| 5     | -47.27 | -60.09  | 3.16 | 2.86 | 0.98  | -999 |
| <hr/> |        |         |      |      |       |      |
| 6     | -71.65 | 175.59  | -999 | -999 | 0.66  | -999 |
| 6     | -71.53 | 175.61  | -999 | 4.02 | 0.57  | -999 |
| 6     | -71.34 | 175.64  | -999 | 2.92 | 0.69  | -999 |
| 6     | -71.11 | 175.67  | -999 | -999 | -999  | -999 |
| 6     | -69.82 | 175.88  | -999 | -999 | 0.36  | -999 |
| 6     | -69.60 | 175.91  | -999 | -999 | 0.61  | -999 |
| 6     | -69.39 | 175.94  | -999 | -999 | 0.91  | -999 |
| 6     | -69.17 | 175.98  | -999 | -999 | 0.99  | -999 |
| 6     | -69.01 | 176.10  | -999 | -999 | 1.04  | -999 |
| 6     | -69.09 | 176.54  | -999 | -999 | 1.24  | -999 |
| 6     | -69.17 | 176.99  | -999 | 2.24 | 0.90  | -999 |
| 6     | -69.25 | 177.46  | -999 | 2.24 | 0.76  | -999 |
| 6     | -69.33 | 177.94  | -999 | 2.41 | 1.05  | -999 |
| 6     | -69.54 | 179.01  | -999 | -999 | 0.71  | -999 |
| 6     | -69.61 | 179.43  | -999 | 0.84 | 0.54  | -999 |
| 6     | -69.71 | 179.54  | -999 | 2.06 | 0.71  | -999 |
| 6     | -69.78 | 179.78  | -999 | -999 | 0.59  | -999 |
| 6     | -69.80 | -179.81 | -999 | 1.35 | 0.59  | -999 |
| 6     | -69.88 | -179.26 | -999 | 4.37 | 0.61  | -999 |
| 6     | -69.91 | -178.99 | -999 | 1.06 | 0.55  | -999 |
| 6     | -69.95 | -178.56 | -999 | 2.16 | 0.63  | -999 |
| 6     | -69.99 | -178.14 | -999 | 1.33 | 0.61  | -999 |
| 6     | -70.03 | -177.74 | -999 | 2.00 | 0.58  | -999 |
| 6     | -70.08 | -177.33 | -999 | 1.35 | 0.68  | -999 |
| 6     | -70.14 | -177.00 | -999 | 1.78 | 0.69  | -999 |
| 6     | -70.28 | -177.00 | -999 | 0.56 | 0.41  | -999 |
| 6     | -70.52 | -177.00 | -999 | 2.06 | 0.52  | -999 |

|   |        |         |      |       |      |      |
|---|--------|---------|------|-------|------|------|
| 6 | -70.62 | -177.00 | -999 | 0.30  | 0.35 | -999 |
| 6 | -70.82 | -177.01 | -999 | 2.31  | 0.85 | -999 |
| 6 | -70.97 | -177.00 | -999 | 1.75  | 0.59 | -999 |
| 6 | -70.92 | -176.58 | -999 | 1.82  | 1.00 | -999 |
| 6 | -70.77 | -176.82 | -999 | -999  | -999 | -999 |
| 6 | -70.62 | -176.84 | -999 | 2.46  | 0.42 | -999 |
| 6 | -70.49 | -176.68 | -999 | 2.90  | 1.41 | -999 |
| 6 | -70.37 | -176.51 | -999 | 6.38  | 2.96 | -999 |
| 6 | -70.35 | -176.89 | -999 | 2.07  | 1.03 | -999 |
| 6 | -70.31 | -177.31 | -999 | 2.78  | 0.78 | -999 |
| 6 | -70.27 | -177.70 | -999 | 3.18  | 1.55 | -999 |
| 6 | -70.06 | -179.53 | -999 | 1.82  | 1.26 | -999 |
| 6 | -69.92 | 179.54  | -999 | -999  | -999 | -999 |
| 6 | -69.86 | 179.15  | -999 | 4.31  | 1.30 | -999 |
| 6 | -69.80 | 178.76  | -999 | 4.49  | 1.15 | -999 |
| 6 | -69.73 | 178.38  | -999 | 3.53  | 1.16 | -999 |
| 6 | -69.67 | 178.02  | -999 | 3.53  | 1.16 | -999 |
| 6 | -69.61 | 177.66  | -999 | 2.55  | 0.99 | -999 |
| 6 | -69.55 | 177.31  | -999 | 3.63  | 1.05 | -999 |
| 6 | -69.49 | 176.94  | -999 | 3.26  | 1.09 | -999 |
| 6 | -69.43 | 176.58  | -999 | 4.34  | 0.82 | -999 |
| 6 | -69.37 | 176.21  | -999 | 5.39  | 0.78 | -999 |
| 6 | -69.27 | 176.05  | -999 | 4.47  | 0.89 | -999 |
| 6 | -69.14 | 176.15  | -999 | 9.16  | 0.79 | -999 |
| 6 | -69.01 | 176.25  | -999 | 10.53 | 0.73 | -999 |
| 6 | -68.88 | 176.36  | -999 | 7.21  | 0.95 | -999 |
| 6 | -68.76 | 176.44  | -999 | 6.39  | 1.64 | -999 |
| 6 | -68.69 | 176.51  | -999 | 4.91  | 1.03 | -999 |
| 6 | -68.58 | 176.59  | -999 | -999  | -999 | -999 |
| 6 | -68.50 | 176.65  | -999 | 0.63  | 0.52 | -999 |
| 6 | -68.61 | 177.62  | -999 | 5.58  | 1.00 | -999 |
| 6 | -68.68 | 178.04  | -999 | 4.99  | 0.93 | -999 |
| 6 | -68.74 | 178.48  | -999 | 3.05  | 1.04 | -999 |
| 6 | -68.80 | 178.91  | -999 | 5.31  | 1.49 | -999 |
| 6 | -68.87 | 179.37  | -999 | 0.92  | 0.35 | -999 |
| 6 | -68.93 | 179.82  | -999 | 4.42  | 1.07 | -999 |
| 6 | -68.99 | -179.74 | -999 | -999  | 1.33 | -999 |
| 6 | -69.05 | -179.29 | -999 | -999  | 1.51 | -999 |
| 6 | -69.11 | -178.84 | -999 | -999  | 1.92 | -999 |
| 6 | -69.25 | -177.84 | -999 | -999  | 2.56 | -999 |
| 6 | -68.96 | -173.70 | -999 | -999  | 1.12 | -999 |
| 6 | -69.13 | -173.78 | -999 | -999  | 0.89 | -999 |
| 6 | -69.24 | -173.66 | -999 | 6.53  | 0.74 | -999 |
| 6 | -69.20 | -173.79 | -999 | 4.48  | 0.62 | -999 |
| 6 | -69.39 | -173.89 | -999 | 4.26  | 0.72 | -999 |
| 6 | -69.54 | -173.90 | -999 | 4.12  | 0.80 | -999 |
| 6 | -69.82 | -174.04 | -999 | 3.05  | 0.60 | -999 |

|   |        |         |      |      |      |      |
|---|--------|---------|------|------|------|------|
| 6 | -69.95 | -174.15 | -999 | 4.68 | 0.83 | -999 |
| 6 | -70.07 | -174.22 | -999 | 2.79 | 0.74 | -999 |
| 6 | -70.19 | -174.29 | -999 | 2.24 | 0.97 | -999 |
| 6 | -70.32 | -174.36 | -999 | 4.30 | 2.40 | -999 |
| 6 | -70.44 | -174.43 | -999 | 5.66 | 2.96 | -999 |
| 6 | -70.55 | -174.48 | -999 | 4.24 | 3.08 | -999 |
| 6 | -70.66 | -174.52 | -999 | 4.73 | 2.15 | -999 |
| 6 | -70.79 | -174.60 | -999 | 4.91 | 2.82 | -999 |
| 6 | -70.90 | -174.66 | -999 | 4.09 | 2.59 | -999 |
| 6 | -71.02 | -174.71 | -999 | 4.27 | 2.36 | -999 |
| 6 | -71.16 | -174.78 | -999 | 3.23 | 1.80 | -999 |
| 6 | -71.29 | -174.87 | -999 | 4.13 | 1.14 | -999 |
| 6 | -71.41 | -174.93 | -999 | 3.39 | 0.86 | -999 |
| 6 | -71.54 | -174.77 | -999 | 4.05 | 0.94 | -999 |
| 6 | -71.54 | -173.81 | -999 | 3.83 | 1.35 | -999 |
| 6 | -71.53 | -173.35 | -999 | 3.62 | 1.74 | -999 |
| 6 | -71.48 | -173.06 | -999 | 2.91 | 2.01 | -999 |
| 6 | -70.82 | -172.77 | -999 | 3.53 | 1.05 | -999 |
| 6 | -70.70 | -172.71 | -999 | 2.66 | 0.56 | -999 |
| 6 | -70.57 | -172.64 | -999 | 2.95 | 0.87 | -999 |
| 6 | -70.41 | -172.58 | -999 | 3.96 | 0.82 | -999 |
| 6 | -70.24 | -172.52 | -999 | 3.43 | 0.61 | -999 |
| 6 | -70.17 | -172.04 | -999 | 3.52 | 0.71 | -999 |
| 6 | -70.17 | -171.36 | -999 | 2.61 | 0.83 | -999 |
| 6 | -70.17 | -170.69 | -999 | 2.99 | 1.28 | -999 |
| 6 | -70.28 | -170.00 | -999 | 0.99 | 0.77 | -999 |
| 6 | -70.97 | -170.00 | -999 | 3.14 | 1.27 | -999 |
| 6 | -71.08 | -170.00 | -999 | 3.18 | 1.41 | -999 |
| 6 | -71.21 | -170.00 | -999 | 3.01 | 1.41 | -999 |
| 6 | -71.34 | -170.00 | -999 | 3.31 | 1.14 | -999 |
| 6 | -71.48 | -169.97 | -999 | 3.49 | 1.10 | -999 |
| 6 | -71.61 | -169.84 | -999 | 3.26 | 0.97 | -999 |
| 6 | -71.75 | -169.83 | -999 | 4.01 | 1.24 | -999 |
| 6 | -71.89 | -169.84 | -999 | 3.12 | 1.11 | -999 |
| 6 | -72.04 | -169.85 | -999 | 3.05 | 0.98 | -999 |
| 6 | -72.18 | -169.85 | -999 | 3.80 | 1.08 | -999 |
| 6 | -72.30 | -168.18 | -999 | -999 | -999 | -999 |
| 6 | -72.31 | -167.43 | -999 | -999 | 0.87 | -999 |
| 6 | -72.31 | -166.68 | -999 | 3.64 | 0.86 | -999 |
| 6 | -72.32 | -165.92 | -999 | 4.51 | 0.88 | -999 |
| 6 | -72.29 | -165.14 | -999 | 3.60 | 0.91 | -999 |
| 6 | -72.34 | -163.54 | -999 | 4.01 | 0.95 | -999 |
| 6 | -72.35 | -162.73 | -999 | 5.37 | 1.32 | -999 |
| 6 | -72.35 | -161.93 | -999 | 2.94 | 0.92 | -999 |
| 6 | -72.36 | -161.14 | -999 | 3.85 | 0.91 | -999 |
| 6 | -72.36 | -160.36 | -999 | 2.65 | 1.11 | -999 |
| 6 | -72.28 | -159.99 | -999 | 3.56 | 1.26 | -999 |



|   |        |         |       |      |      |      |
|---|--------|---------|-------|------|------|------|
| 6 | -72.12 | -160.02 | -999  | 3.33 | 0.90 | -999 |
| 6 | -71.86 | -160.00 | -999  | 2.83 | 0.82 | -999 |
| 6 | -71.81 | -159.71 | -999  | 4.03 | 0.88 | -999 |
| 6 | -71.80 | -159.23 | -999  | 2.91 | 0.87 | -999 |
| 6 | -71.81 | -158.75 | -999  | 2.86 | 1.01 | -999 |
| 6 | -71.80 | -158.27 | -999  | 3.47 | 0.87 | -999 |
| 6 | -71.86 | -157.99 | -999  | 2.80 | 0.91 | -999 |
| 6 | -72.01 | -158.00 | -999  | 2.79 | 1.26 | -999 |
| 6 | -72.17 | -158.00 | -999  | 3.04 | 1.31 | -999 |
| 6 | -72.63 | -158.41 | -999  | -999 | 1.68 | -999 |
| 6 | -72.61 | -158.89 | -999  | 2.44 | 1.82 | -999 |
| 6 | -72.58 | -159.39 | -999  | 3.04 | 1.53 | -999 |
| 6 | -72.56 | -159.87 | -999  | 2.83 | 1.12 | -999 |
| 6 | -72.43 | -160.00 | -999  | 3.40 | 1.32 | -999 |
| 6 | -72.37 | -159.71 | -999  | 5.38 | 1.53 | -999 |
| 6 | -72.37 | -159.22 | -999  | 4.60 | 1.28 | -999 |
| 6 | -72.39 | -157.88 | 8.29  | 6.05 | 1.30 | -999 |
| 6 | -72.39 | -156.89 | 9.48  | 5.85 | 1.69 | -999 |
| 6 | -72.40 | -156.40 | 10.21 | 6.78 | 2.16 | -999 |
| 6 | -72.40 | -155.90 | 10.10 | 8.85 | 5.12 | -999 |
| 6 | -72.41 | -155.40 | 11.35 | 7.41 | 2.53 | -999 |
| 6 | -72.41 | -154.90 | 12.12 | 8.19 | 1.15 | -999 |
| 6 | -72.41 | -154.39 | 4.60  | 4.52 | 1.61 | -999 |
| 6 | -72.42 | -153.88 | 9.70  | 8.24 | 3.68 | -999 |
| 6 | -72.42 | -153.41 | 7.05  | 4.93 | 4.09 | -999 |
| 6 | -72.42 | -152.97 | 7.28  | 4.93 | 3.78 | -999 |
| 6 | -72.42 | -152.53 | 4.39  | 4.37 | 2.40 | -999 |
| 6 | -72.52 | -152.50 | 4.24  | 3.45 | 2.25 | -999 |
| 6 | -72.66 | -152.50 | 5.17  | 3.80 | 2.86 | -999 |
| 6 | -72.89 | -152.50 | 4.80  | 3.55 | 1.97 | -999 |
| 6 | -73.03 | -152.50 | 4.63  | 4.11 | 1.68 | -999 |
| 6 | -73.16 | -152.51 | 3.92  | 3.24 | 1.75 | -999 |
| 6 | -73.29 | -152.50 | 4.33  | -999 | -999 | -999 |
| 6 | -73.29 | -151.59 | 4.41  | 3.90 | 1.82 | -999 |
| 6 | -73.29 | -151.18 | 3.54  | 4.77 | 1.67 | -999 |
| 6 | -73.29 | -150.75 | 4.40  | 3.64 | 1.64 | -999 |
| 6 | -73.30 | -150.31 | 4.39  | 3.71 | 1.81 | -999 |
| 6 | -73.34 | -150.01 | 5.43  | 4.52 | 1.41 | -999 |
| 6 | -73.47 | -150.04 | 5.56  | 3.54 | 1.50 | -999 |
| 6 | -73.60 | -150.02 | 5.50  | 4.07 | 1.62 | -999 |
| 6 | -73.86 | -150.04 | 6.13  | 4.77 | 1.65 | -999 |
| 6 | -73.95 | -150.22 | 6.84  | 4.12 | 1.48 | -999 |
| 6 | -74.01 | -150.74 | 6.13  | 3.50 | 1.66 | -999 |
| 6 | -73.88 | -151.00 | 7.38  | 3.28 | 1.68 | -999 |
| 6 | -73.73 | -150.99 | 6.68  | 3.24 | 1.47 | -999 |
| 6 | -73.61 | -151.05 | 7.00  | 3.33 | 1.51 | -999 |
| 6 | -73.58 | -151.49 | 6.05  | 3.28 | 2.05 | -999 |

|   |        |         |      |      |      |      |
|---|--------|---------|------|------|------|------|
| 6 | -73.59 | -151.95 | 6.13 | 3.68 | 1.61 | -999 |
| 6 | -73.70 | -151.95 | 5.97 | 3.81 | 1.54 | -999 |
| 6 | -73.81 | -152.01 | 6.29 | 4.47 | 1.53 | -999 |
| 6 | -73.99 | -152.06 | -999 | -999 | -999 | -999 |
| 6 | -74.02 | -152.10 | 5.71 | 4.01 | 1.31 | -999 |
| 6 | -74.04 | -152.50 | 6.36 | 4.55 | 1.50 | -999 |
| 6 | -73.91 | -152.47 | 6.29 | 5.08 | 1.36 | -999 |
| 6 | -73.77 | -152.53 | 6.53 | 3.42 | 1.50 | -999 |
| 6 | -73.65 | -152.46 | 6.94 | 4.35 | 1.56 | -999 |
| 6 | -73.54 | -152.54 | 7.01 | 4.25 | 1.66 | -999 |
| 6 | -73.49 | -152.29 | 6.53 | 5.08 | 1.74 | -999 |
| 6 | -73.48 | -151.92 | 5.98 | 4.51 | 1.67 | -999 |
| 6 | -73.49 | -151.54 | 7.07 | 3.68 | 1.95 | -999 |
| 6 | -73.49 | -151.16 | 6.99 | 3.94 | 2.00 | -999 |
| 6 | -73.42 | -151.00 | 7.38 | 3.46 | 1.53 | -999 |
| 6 | -73.29 | -150.99 | 8.01 | 3.76 | 1.64 | -999 |
| 6 | -72.82 | -151.09 | 7.78 | 4.51 | 1.51 | -999 |
| 6 | -72.81 | -151.52 | 6.37 | 4.99 | 1.98 | -999 |
| 6 | -72.72 | -151.43 | 6.45 | 3.07 | 1.99 | -999 |
| 6 | -72.72 | -150.99 | 7.08 | 4.16 | 1.65 | -999 |
| 6 | -72.72 | -150.57 | 5.90 | 4.08 | 1.38 | -999 |
| 6 | -72.72 | -150.13 | 7.24 | 4.56 | 1.39 | -999 |
| 6 | -72.62 | -149.99 | 6.69 | 3.81 | 1.45 | -999 |
| 6 | -72.49 | -150.00 | 6.77 | 3.86 | 1.49 | -999 |
| 6 | -72.35 | -150.00 | 6.62 | 3.86 | 1.65 | -999 |
| 6 | -72.19 | -149.98 | 7.08 | 4.82 | 1.38 | -999 |
| 6 | -72.06 | -149.94 | 7.08 | 3.46 | 1.61 | -999 |
| 6 | -71.94 | -149.74 | 7.32 | 3.38 | 1.60 | -999 |
| 6 | -71.82 | -149.72 | 7.14 | 3.15 | 1.08 | -999 |
| 6 | -71.66 | -149.36 | 7.08 | 3.68 | 1.33 | -999 |
| 6 | -71.50 | -149.02 | 7.08 | 2.76 | 1.14 | -999 |
| 6 | -71.29 | -148.58 | 6.65 | 3.36 | 0.82 | -999 |
| 6 | -71.11 | -148.22 | 5.74 | 3.50 | 0.91 | -999 |
| 6 | -70.95 | -147.75 | 5.82 | 3.64 | 0.92 | -999 |
| 6 | -70.84 | -147.16 | 5.19 | 3.55 | 0.84 | -999 |
| 6 | -70.62 | -146.00 | 5.75 | 3.46 | 0.76 | -999 |
| 6 | -70.51 | -145.44 | 5.44 | 3.42 | 0.72 | -999 |
| 6 | -70.40 | -144.87 | 5.22 | 3.48 | 0.78 | -999 |
| 6 | -70.28 | -144.31 | 5.31 | 3.35 | 0.78 | -999 |
| 6 | -70.18 | -143.76 | 5.58 | 4.38 | 0.79 | -999 |
| 6 | -70.07 | -143.22 | 5.58 | 3.28 | 0.76 | -999 |
| 6 | -69.96 | -142.68 | 5.27 | 4.12 | 0.76 | -999 |
| 6 | -69.92 | -142.34 | 5.49 | 3.98 | 0.76 | -999 |
| 6 | -69.80 | -142.18 | 5.51 | 3.99 | 0.85 | -999 |
| 6 | -69.59 | -141.28 | 5.98 | 4.07 | 0.63 | -999 |
| 6 | -69.53 | -140.73 | -999 | -999 | -999 | -999 |
| 6 | -69.40 | -139.90 | 4.55 | 3.14 | 0.06 | -999 |

|   |        |         |       |      |      |      |
|---|--------|---------|-------|------|------|------|
| 6 | -69.36 | -139.71 | 5.72  | 4.05 | 0.55 | -999 |
| 6 | -69.26 | -139.24 | 6.14  | 3.56 | 0.59 | -999 |
| 6 | -69.15 | -138.72 | 6.12  | 5.00 | 0.62 | -999 |
| 6 | -69.04 | -138.21 | 6.15  | 4.42 | 0.62 | -999 |
| 6 | -69.14 | -137.87 | 5.53  | 4.33 | 0.68 | -999 |
| 6 | -69.35 | -137.66 | 5.64  | 3.70 | 0.63 | -999 |
| 6 | -69.56 | -137.46 | 6.01  | 3.23 | 0.66 | -999 |
| 6 | -69.77 | -137.25 | 5.92  | 3.44 | 0.63 | -999 |
| 6 | -69.97 | -137.05 | 5.99  | 3.90 | 0.66 | -999 |
| 6 | -70.18 | -136.84 | 7.74  | 4.05 | 0.93 | -999 |
| 6 | -70.38 | -136.64 | 7.76  | 4.06 | 0.88 | -999 |
| 6 | -70.56 | -136.45 | 7.63  | 3.65 | 0.90 | -999 |
| 6 | -70.76 | -136.26 | 10.12 | 3.69 | 0.82 | -999 |
| 6 | -70.95 | -136.05 | 10.22 | 3.52 | 0.87 | -999 |
| 6 | -71.10 | -135.89 | 10.53 | 3.98 | 1.03 | -999 |
| 6 | -71.25 | -135.45 | 8.97  | 2.94 | 0.97 | -999 |
| 6 | -71.25 | -135.06 | 10.23 | 2.89 | 1.03 | -999 |
| 6 | -71.24 | -134.67 | 9.99  | 3.78 | 0.98 | -999 |
| 6 | -71.25 | -134.28 | 8.65  | 4.42 | 0.91 | -999 |
| 6 | -71.25 | -133.81 | 9.83  | 3.50 | 0.93 | -999 |
| 6 | -71.34 | -133.48 | 9.46  | 2.92 | 0.72 | -999 |
| 6 | -71.41 | -133.18 | 8.36  | 3.35 | 0.74 | -999 |
| 6 | -71.49 | -132.90 | 7.95  | 5.00 | 0.74 | -999 |
| 6 | -71.58 | -132.53 | 8.42  | 3.52 | 0.77 | -999 |
| 6 | -71.69 | -132.14 | 8.60  | 3.53 | 0.88 | -999 |
| 6 | -71.82 | -131.66 | 8.97  | 3.78 | 0.94 | -999 |
| 6 | -71.96 | -131.17 | 7.11  | 3.40 | 1.08 | -999 |
| 6 | -72.10 | -130.64 | 7.19  | 4.66 | 0.98 | -999 |
| 6 | -72.11 | -130.26 | 7.04  | 3.57 | 1.12 | -999 |
| 6 | -71.97 | -130.78 | 7.32  | 3.99 | 0.80 | -999 |
| 6 | -71.84 | -131.26 | 7.72  | 4.17 | 0.85 | -999 |
| 6 | -71.66 | -131.94 | 7.87  | 3.82 | 0.82 | -999 |
| 6 | -71.52 | -132.31 | 10.77 | 3.52 | 0.88 | -999 |
| 6 | -71.33 | -132.25 | 7.98  | 4.20 | 0.58 | -999 |
| 6 | -71.17 | -132.04 | 8.15  | 4.07 | 0.66 | -999 |
| 6 | -71.01 | -131.76 | -999  | -999 | 0.71 | -999 |
| 6 | -70.69 | -131.21 | 11.35 | 4.49 | 0.84 | -999 |
| 6 | -69.69 | -129.43 | 4.97  | 3.03 | 0.77 | -999 |
| 6 | -69.75 | -129.10 | 5.93  | 4.30 | 0.87 | -999 |
| 6 | -69.85 | -129.29 | 5.45  | 3.82 | 0.92 | -999 |
| 6 | -69.85 | -129.75 | 6.34  | 4.88 | 0.71 | -999 |
| 6 | -69.69 | -129.75 | 5.44  | 4.23 | 0.76 | -999 |
| 6 | -69.59 | -129.75 | 5.74  | 3.12 | 0.68 | -999 |
| 6 | -69.46 | -129.75 | 6.65  | 4.23 | 0.67 | -999 |
| 6 | -69.35 | -129.75 | 6.25  | 4.17 | 0.77 | -999 |
| 6 | -69.22 | -129.75 | 5.75  | 3.68 | 0.59 | -999 |
| 6 | -69.09 | -129.75 | 5.99  | 3.61 | 0.59 | -999 |

|   |        |         |       |      |      |      |
|---|--------|---------|-------|------|------|------|
| 6 | -68.97 | -129.80 | 6.45  | 5.34 | 0.52 | -999 |
| 6 | -68.86 | -129.98 | 6.96  | 5.66 | 0.63 | -999 |
| 6 | -68.75 | -130.17 | 7.41  | 4.19 | 0.67 | -999 |
| 6 | -68.64 | -130.36 | 7.11  | 4.99 | 0.67 | -999 |
| 6 | -68.53 | -130.56 | 7.66  | 4.24 | 0.73 | -999 |
| 6 | -68.42 | -130.74 | 8.66  | 4.42 | 0.71 | -999 |
| 6 | -68.31 | -130.93 | 8.12  | 3.75 | 0.67 | -999 |
| 6 | -68.20 | -131.11 | 10.14 | 3.45 | 0.84 | -999 |
| 6 | -68.09 | -131.28 | 9.65  | 4.40 | 0.88 | -999 |
| 6 | -67.99 | -131.45 | 10.06 | 3.34 | 0.74 | -999 |
| 6 | -67.88 | -131.63 | 10.22 | 3.55 | 0.76 | -999 |
| 6 | -67.78 | -131.80 | 10.14 | 4.01 | 0.79 | -999 |
| 6 | -67.67 | -131.98 | 10.37 | 3.80 | 0.90 | -999 |
| 6 | -67.55 | -132.16 | 10.97 | 4.06 | 0.86 | -999 |
| 6 | -67.42 | -132.39 | 10.67 | 5.63 | 0.78 | -999 |
| 6 | -67.30 | -132.58 | 11.08 | 5.45 | 0.83 | -999 |
| 6 | -67.21 | -132.46 | 10.66 | 4.85 | 0.90 | -999 |
| 6 | -67.12 | -132.04 | 8.98  | 4.88 | 0.68 | -999 |
| 6 | -67.14 | -131.81 | 9.42  | 4.27 | 0.70 | -999 |
| 6 | -67.25 | -131.61 | 8.20  | 4.00 | 0.68 | -999 |
| 6 | -67.35 | -131.42 | 8.63  | 4.17 | 0.78 | -999 |
| 6 | -67.45 | -131.22 | 9.17  | 4.15 | 0.82 | -999 |
| 6 | -67.56 | -131.02 | 8.88  | 4.71 | 0.83 | -999 |
| 6 | -67.66 | -130.82 | 9.63  | 4.01 | 0.78 | -999 |
| 6 | -67.76 | -130.63 | 8.08  | 4.49 | 0.68 | -999 |
| 6 | -67.86 | -130.43 | 8.38  | 4.07 | 0.74 | -999 |
| 6 | -67.97 | -130.23 | 8.89  | 4.65 | 0.71 | -999 |
| 6 | -68.07 | -130.04 | 7.68  | 4.18 | 0.60 | -999 |
| 6 | -68.17 | -129.84 | 8.50  | 4.81 | 0.61 | -999 |
| 6 | -68.27 | -129.65 | 7.55  | 5.69 | 0.59 | -999 |
| 6 | -68.37 | -129.45 | 7.12  | 4.36 | 0.56 | -999 |
| 6 | -68.54 | -129.11 | 7.12  | 4.24 | 0.56 | -999 |
| 6 | -68.65 | -128.89 | 7.28  | 4.16 | 0.56 | -999 |
| 6 | -68.76 | -128.68 | -999  | -999 | 0.64 | -999 |
| 6 | -68.87 | -128.46 | 7.25  | 3.76 | 0.70 | -999 |
| 6 | -68.98 | -128.25 | 6.91  | 4.63 | 0.66 | -999 |
| 6 | -69.08 | -128.03 | 7.80  | 3.85 | 0.69 | -999 |
| 6 | -69.19 | -127.82 | 7.45  | 3.99 | 0.73 | -999 |
| 6 | -69.16 | -127.48 | 8.85  | 4.87 | 0.69 | -999 |
| 6 | -69.12 | -127.13 | 7.76  | 4.17 | 0.69 | -999 |
| 6 | -69.08 | -126.77 | 7.97  | 4.37 | 0.83 | -999 |
| 6 | -69.04 | -126.41 | 7.77  | 5.73 | 0.72 | -999 |
| 6 | -69.00 | -126.06 | 8.97  | 4.41 | 0.71 | -999 |
| 6 | -68.96 | -125.69 | 8.81  | 3.78 | 0.67 | -999 |
| 6 | -68.92 | -125.35 | 8.16  | 3.45 | 0.83 | -999 |
| 6 | -68.88 | -125.01 | 8.93  | 3.85 | 0.77 | -999 |
| 6 | -68.85 | -124.67 | 9.17  | 4.39 | 0.69 | -999 |

|   |        |         |       |      |      |      |
|---|--------|---------|-------|------|------|------|
| 6 | -68.77 | -124.66 | 10.13 | 4.77 | 0.65 | -999 |
| 6 | -68.66 | -124.89 | 10.00 | 4.61 | 0.61 | -999 |
| 6 | -68.55 | -125.12 | 10.06 | 4.48 | 0.62 | -999 |
| 6 | -68.45 | -125.33 | 10.19 | 4.93 | 0.61 | -999 |
| 6 | -68.35 | -125.54 | 9.17  | 3.40 | 0.61 | -999 |
| 6 | -68.26 | -125.75 | 9.97  | 3.89 | 0.59 | -999 |
| 6 | -68.16 | -125.96 | 10.01 | 4.05 | 0.63 | -999 |
| 6 | -68.05 | -126.17 | 10.07 | 3.67 | 0.69 | -999 |
| 6 | -67.95 | -126.39 | 10.03 | 4.73 | 0.63 | -999 |
| 6 | -67.85 | -126.60 | 9.40  | 4.37 | 0.68 | -999 |
| 6 | -67.74 | -126.81 | 9.34  | 3.92 | 0.61 | -999 |
| 6 | -67.64 | -127.01 | 9.50  | 3.80 | 0.69 | -999 |
| 6 | -67.54 | -127.21 | 8.98  | 3.88 | 0.73 | -999 |
| 6 | -67.45 | -127.41 | 9.93  | 3.30 | 0.78 | -999 |
| 6 | -67.35 | -127.62 | 11.06 | 3.60 | 0.76 | -999 |
| 6 | -67.24 | -127.82 | 11.38 | 3.95 | 0.72 | -999 |
| 6 | -67.14 | -128.02 | 12.39 | 4.31 | 0.79 | -999 |
| 6 | -67.05 | -128.22 | 12.15 | 3.58 | 0.72 | -999 |
| 6 | -66.94 | -128.43 | 11.58 | 4.25 | 0.74 | -999 |
| 6 | -66.84 | -128.63 | 11.47 | 4.74 | 0.75 | -999 |
| 6 | -66.74 | -128.84 | 11.62 | 4.56 | 0.73 | -999 |
| 6 | -66.63 | -129.05 | 11.89 | 5.25 | 0.75 | -999 |
| 6 | -66.53 | -129.27 | 12.13 | 4.90 | 0.72 | -999 |
| 6 | -66.42 | -129.47 | 12.71 | 4.96 | 0.73 | -999 |
| 6 | -66.34 | -129.26 | 11.53 | 3.60 | 0.75 | -999 |
| 6 | -66.27 | -129.01 | 12.13 | 4.44 | 0.78 | -999 |
| 6 | -66.19 | -128.75 | 12.12 | 3.71 | 0.74 | -999 |
| 6 | -66.10 | -128.49 | 11.58 | 4.48 | 0.72 | -999 |
| 6 | -66.03 | -128.22 | 11.88 | 4.26 | 0.80 | -999 |
| 6 | -65.95 | -127.97 | 12.68 | 4.76 | 0.78 | -999 |
| 6 | -65.94 | -127.75 | 13.20 | 5.19 | 0.81 | -999 |
| 6 | -66.05 | -127.57 | 12.39 | 5.04 | 0.77 | -999 |
| 6 | -66.14 | -127.39 | 13.09 | 5.18 | 0.83 | -999 |
| 6 | -66.25 | -127.19 | 12.10 | 3.98 | 0.83 | -999 |
| 6 | -66.35 | -127.00 | 12.34 | 4.59 | 0.81 | -999 |
| 6 | -66.46 | -126.81 | 14.38 | 5.85 | 0.97 | -999 |
| 6 | -66.57 | -126.59 | 10.29 | 5.46 | 0.84 | -999 |
| 6 | -66.67 | -126.41 | 9.57  | 3.76 | 0.73 | -999 |
| 6 | -66.77 | -126.22 | 10.09 | 3.90 | 0.77 | -999 |
| 6 | -66.87 | -126.02 | 10.37 | 3.93 | 0.73 | -999 |
| 6 | -66.98 | -125.82 | 10.93 | 4.19 | 0.71 | -999 |
| 6 | -67.08 | -125.62 | -999  | -999 | -999 | -999 |
| 6 | -67.19 | -125.42 | 10.70 | 4.33 | 0.69 | -999 |
| 6 | -67.30 | -125.21 | 10.63 | 4.01 | 0.71 | -999 |
| 6 | -67.41 | -125.00 | 8.85  | 3.23 | 0.63 | -999 |
| 6 | -67.52 | -124.80 | 9.77  | 4.04 | 0.63 | -999 |
| 6 | -67.62 | -124.59 | 9.90  | 3.60 | 0.63 | -999 |

|   |        |         |       |      |      |      |
|---|--------|---------|-------|------|------|------|
| 6 | -67.73 | -124.38 | 10.29 | 4.12 | 0.59 | -999 |
| 6 | -67.83 | -124.18 | 10.00 | 4.62 | 0.64 | -999 |
| 6 | -67.94 | -123.98 | 10.18 | 3.95 | 0.61 | -999 |
| 6 | -68.04 | -123.77 | -999  | -999 | 0.60 | -999 |
| 6 | -68.14 | -123.57 | 10.32 | 4.37 | 0.60 | -999 |
| 6 | -68.25 | -123.36 | 10.37 | 4.35 | 0.64 | -999 |
| 6 | -68.35 | -123.14 | 10.60 | 4.64 | 0.63 | -999 |
| 6 | -68.46 | -122.93 | 11.05 | 4.57 | 0.58 | -999 |
| 6 | -68.57 | -122.71 | 10.71 | 4.47 | 0.61 | -999 |
| 6 | -68.63 | -122.43 | 12.39 | 4.54 | 0.60 | -999 |
| 6 | -68.66 | -122.13 | 11.10 | 5.12 | 0.63 | -999 |
| 6 | -68.70 | -121.64 | 10.50 | 3.95 | 0.61 | -999 |
| 6 | -68.75 | -121.12 | 11.00 | 4.03 | 0.61 | -999 |
| 6 | -68.88 | -120.77 | 10.42 | 4.20 | 0.63 | -999 |
| 6 | -69.06 | -120.53 | 9.62  | 4.17 | 0.67 | -999 |
| 6 | -69.23 | -120.30 | 10.36 | 3.63 | 0.63 | -999 |
| 6 | -69.41 | -120.06 | 8.83  | 3.98 | 0.59 | -999 |
| 6 | -69.59 | -119.82 | 7.57  | 3.78 | 0.51 | -999 |
| 6 | -69.77 | -119.58 | 8.13  | 4.34 | 0.51 | -999 |
| 6 | -69.94 | -119.33 | 8.13  | 4.01 | 0.50 | -999 |
| 6 | -70.13 | -119.10 | 8.15  | 4.21 | 0.48 | -999 |
| 6 | -70.32 | -118.81 | 8.33  | 3.97 | 0.63 | -999 |
| 6 | -70.40 | -119.27 | 8.35  | 4.36 | 0.62 | -999 |
| 6 | -70.44 | -119.95 | 8.05  | 3.96 | 0.76 | -999 |
| 6 | -70.48 | -120.61 | 7.99  | 4.28 | 0.74 | -999 |
| 6 | -70.51 | -121.14 | 8.56  | 3.19 | 0.99 | -999 |
| 6 | -70.51 | -121.51 | 8.50  | 3.48 | 0.80 | -999 |
| 6 | -70.37 | -121.61 | 7.58  | 3.88 | 0.69 | -999 |
| 6 | -70.14 | -121.83 | 8.26  | 4.05 | 0.70 | -999 |
| 6 | -69.95 | -121.99 | 7.07  | 2.93 | 0.66 | -999 |
| 6 | -69.86 | -122.06 | 6.91  | 2.80 | 0.59 | -999 |
| 6 | -69.65 | -122.23 | 7.53  | 3.37 | 0.58 | -999 |
| 6 | -69.45 | -122.40 | 7.06  | 4.08 | 0.59 | -999 |
| 6 | -69.23 | -122.57 | 7.42  | 4.24 | 0.48 | -999 |
| 6 | -69.03 | -122.73 | 7.65  | 3.99 | 0.48 | -999 |
| 6 | -68.88 | -122.94 | 9.81  | 4.34 | 0.53 | -999 |
| 6 | -69.06 | -123.02 | 8.71  | 4.03 | 0.54 | -999 |
| 6 | -69.07 | -123.61 | 9.81  | 4.78 | 0.58 | -999 |
| 6 | -69.10 | -124.09 | 9.40  | 5.52 | 0.56 | -999 |
| 6 | -69.18 | -123.73 | 9.70  | 4.96 | 0.58 | -999 |
| 6 | -69.18 | -123.13 | 8.45  | 4.48 | 0.55 | -999 |
| 6 | -69.13 | -122.91 | 8.35  | 3.16 | 0.54 | -999 |
| 6 | -69.10 | -123.51 | 9.19  | 3.37 | 0.68 | -999 |
| 6 | -69.13 | -123.33 | 7.41  | 2.67 | 0.56 | -999 |
| 6 | -68.97 | -123.31 | 8.87  | 2.82 | 0.68 | -999 |
| 6 | -68.98 | -123.86 | 9.22  | 3.39 | 0.67 | -999 |
| 6 | -69.07 | -124.24 | 9.86  | 4.23 | 0.67 | -999 |

|   |        |         |       |      |      |      |
|---|--------|---------|-------|------|------|------|
| 6 | -69.27 | -124.21 | -999  | 2.74 | 0.69 | -999 |
| 6 | -69.46 | -124.20 | 8.00  | 3.68 | 0.77 | -999 |
| 6 | -69.60 | -124.17 | 8.13  | 2.66 | 0.73 | -999 |
| 6 | -69.71 | -124.24 | 8.07  | 2.53 | 0.77 | -999 |
| 6 | -69.67 | -124.61 | 8.10  | 3.15 | 1.03 | -999 |
| 6 | -69.64 | -124.96 | 8.33  | 2.76 | 0.97 | -999 |
| 6 | -69.60 | -125.33 | 8.65  | 2.80 | 1.05 | -999 |
| 6 | -69.50 | -125.63 | 8.56  | 3.15 | 0.77 | -999 |
| 6 | -69.41 | -125.98 | 9.09  | 3.36 | 0.71 | -999 |
| 6 | -69.29 | -126.29 | 8.50  | 3.39 | 0.67 | -999 |
| 6 | -69.19 | -126.62 | 9.00  | 3.45 | 0.74 | -999 |
| 6 | -69.09 | -126.95 | 8.33  | 3.68 | 0.71 | -999 |
| 6 | -69.00 | -127.30 | 8.46  | 3.32 | 0.71 | -999 |
| 6 | -68.99 | -127.65 | 7.63  | 2.73 | 0.59 | -999 |
| 6 | -69.17 | -127.75 | 7.52  | 3.14 | 0.73 | -999 |
| 6 | -69.30 | -127.73 | 7.87  | 2.94 | 1.10 | -999 |
| 6 | -69.43 | -127.72 | 7.55  | 2.54 | 0.95 | -999 |
| 6 | -69.55 | -127.65 | 7.29  | 2.23 | 1.05 | -999 |
| 6 | -69.66 | -127.58 | 6.97  | 2.95 | 1.41 | -999 |
| 6 | -69.66 | -127.93 | 13.02 | 3.23 | 1.37 | -999 |
| 6 | -69.55 | -128.10 | 6.95  | 4.39 | 0.92 | -999 |
| 6 | -69.42 | -128.32 | 6.67  | 2.75 | 0.94 | -999 |
| 6 | -69.30 | -128.51 | 5.82  | 4.03 | 0.98 | -999 |
| 6 | -69.18 | -128.73 | 5.82  | 4.34 | 0.80 | -999 |
| 6 | -69.06 | -128.89 | 4.88  | 3.90 | 0.65 | -999 |
| 6 | -68.94 | -129.10 | 5.33  | 3.40 | 0.58 | -999 |
| 6 | -68.80 | -129.37 | 5.78  | 3.31 | 0.51 | -999 |
| 6 | -68.67 | -129.61 | 5.82  | 3.94 | 0.48 | -999 |
| 6 | -68.32 | -130.25 | 6.59  | 3.39 | 0.50 | -999 |
| 6 | -68.19 | -130.34 | 7.01  | 3.58 | 0.57 | -999 |
| 6 | -68.14 | -130.13 | 7.48  | 3.20 | 0.63 | -999 |
| 6 | -68.06 | -129.89 | 6.92  | 3.92 | 0.63 | -999 |
| 6 | -67.99 | -129.64 | 7.09  | 3.97 | 0.76 | -999 |
| 6 | -67.92 | -129.38 | 7.07  | 3.79 | 0.76 | -999 |
| 6 | -67.84 | -129.11 | 6.70  | 3.96 | 0.71 | -999 |
| 6 | -67.77 | -128.82 | 5.83  | 3.97 | 0.73 | -999 |
| 6 | -67.69 | -128.56 | 5.49  | 3.75 | 0.61 | -999 |
| 6 | -67.62 | -128.29 | 4.81  | 3.91 | 0.61 | -999 |
| 6 | -67.54 | -128.03 | 5.03  | 4.12 | 0.68 | -999 |
| 6 | -67.63 | -127.82 | 4.79  | 4.36 | 0.65 | -999 |
| 6 | -67.73 | -127.62 | 5.01  | 3.94 | 0.60 | -999 |
| 6 | -67.83 | -127.41 | 5.47  | 3.78 | 0.56 | -999 |
| 6 | -67.93 | -127.19 | 5.09  | 3.56 | 0.59 | -999 |
| 6 | -68.04 | -126.98 | 6.29  | 4.27 | 0.56 | -999 |
| 6 | -68.14 | -126.76 | 6.92  | 3.71 | 0.56 | -999 |
| 6 | -68.25 | -126.56 | 6.87  | 3.80 | 0.55 | -999 |
| 6 | -68.35 | -126.35 | 7.72  | 3.56 | 0.53 | -999 |

|   |        |         |       |      |      |      |
|---|--------|---------|-------|------|------|------|
| 6 | -68.41 | -126.40 | 7.89  | 4.58 | 0.56 | -999 |
| 6 | -68.40 | -126.73 | 8.80  | 3.90 | 0.64 | -999 |
| 6 | -68.40 | -127.06 | 8.86  | 3.90 | 0.60 | -999 |
| 6 | -68.39 | -127.34 | 8.40  | 3.93 | 0.63 | -999 |
| 6 | -68.39 | -127.61 | 8.56  | 3.77 | 0.56 | -999 |
| 6 | -68.38 | -127.86 | 6.19  | 4.01 | 0.52 | -999 |
| 6 | -68.26 | -128.00 | 7.12  | 3.34 | 0.52 | -999 |
| 6 | -68.15 | -128.12 | 6.49  | 3.67 | 0.52 | -999 |
| 6 | -68.07 | -128.31 | 6.27  | 3.93 | 0.52 | -999 |
| 6 | -67.99 | -128.53 | 5.52  | 3.72 | 0.53 | -999 |
| 6 | -67.91 | -128.75 | 5.53  | 4.06 | 0.47 | -999 |
| 6 | -67.82 | -128.96 | 6.00  | 4.37 | 0.64 | -999 |
| 6 | -67.73 | -129.17 | 6.59  | 4.44 | 0.66 | -999 |
| 6 | -67.65 | -129.09 | 6.11  | 4.01 | 0.71 | -999 |
| 6 | -67.56 | -128.84 | 5.61  | 4.11 | 0.68 | -999 |
| 6 | -67.47 | -128.58 | 6.45  | 4.11 | 0.67 | -999 |
| 6 | -67.39 | -128.33 | 6.41  | 3.84 | 0.68 | -999 |
| 6 | -67.30 | -128.08 | 8.35  | 4.20 | 0.74 | -999 |
| 6 | -67.17 | -127.68 | 8.14  | 4.20 | 0.70 | -999 |
| 6 | -67.08 | -127.44 | 8.98  | 3.57 | 0.68 | -999 |
| 6 | -67.00 | -127.20 | 8.34  | 3.88 | 0.63 | -999 |
| 6 | -66.92 | -126.97 | 9.96  | 5.69 | 0.76 | -999 |
| 6 | -66.84 | -126.73 | 9.86  | 5.35 | 0.75 | -999 |
| 6 | -66.76 | -126.49 | 8.89  | 3.97 | 0.81 | -999 |
| 6 | -66.68 | -126.26 | 13.23 | 4.13 | 0.67 | -999 |
| 6 | -66.76 | -126.32 | -999  | 4.48 | 0.70 | -999 |
| 6 | -67.10 | -125.92 | 8.13  | 4.76 | 0.70 | -999 |
| 6 | -67.16 | -125.67 | 9.42  | 4.51 | 0.68 | -999 |
| 6 | -67.00 | -125.80 | 12.14 | 4.64 | 0.67 | -999 |
| 6 | -67.00 | -125.81 | 19.75 | 4.23 | 0.73 | -999 |
| 6 | -67.00 | -125.87 | 19.34 | 4.12 | 0.68 | -999 |
| 6 | -67.00 | -125.87 | 30.23 | 3.79 | 0.76 | -999 |
| 6 | -66.89 | -125.56 | 8.54  | 4.17 | 0.66 | -999 |
| 6 | -66.75 | -125.15 | 9.24  | 4.17 | 0.70 | -999 |
| 6 | -66.48 | -124.22 | -999  | -999 | -999 | -999 |
| 6 | -66.65 | -123.87 | 8.83  | 5.00 | 0.65 | -999 |
| 6 | -66.81 | -123.52 | 8.34  | 3.02 | 0.60 | -999 |
| 6 | -66.99 | -123.16 | 8.72  | 3.49 | 0.62 | -999 |
| 6 | -67.15 | -122.81 | 8.47  | 3.61 | 0.62 | -999 |
| 6 | -67.32 | -122.46 | 8.58  | 4.86 | 0.59 | -999 |
| 6 | -67.49 | -122.10 | 8.72  | 3.88 | 0.55 | -999 |
| 6 | -67.66 | -121.73 | 8.50  | 4.24 | 0.48 | -999 |
| 6 | -67.83 | -121.36 | 8.78  | 3.86 | 0.53 | -999 |
| 6 | -68.01 | -120.99 | 8.73  | 4.33 | 0.57 | -999 |
| 6 | -68.20 | -120.74 | 8.92  | 4.50 | 0.58 | -999 |
| 6 | -68.37 | -119.90 | 8.08  | 4.15 | 0.53 | -999 |
| 6 | -68.36 | -119.33 | 7.51  | 4.04 | 0.46 | -999 |



|   |        |         |       |      |      |      |
|---|--------|---------|-------|------|------|------|
| 6 | -68.34 | -118.72 | 8.30  | 4.24 | 0.53 | -999 |
| 6 | -68.33 | -118.08 | 8.22  | 3.90 | 0.51 | -999 |
| 6 | -68.31 | -117.44 | 7.67  | 4.59 | 0.56 | -999 |
| 6 | -68.38 | -116.91 | 8.74  | 4.33 | 0.50 | -999 |
| 6 | -68.62 | -116.74 | 7.77  | 3.49 | 0.41 | -999 |
| 6 | -68.85 | -116.55 | 7.31  | 4.43 | 0.46 | -999 |
| 6 | -69.07 | -116.35 | 7.45  | 4.38 | 0.48 | -999 |
| 6 | -68.99 | -115.77 | 7.99  | 4.35 | 0.51 | -999 |
| 6 | -68.92 | -115.14 | 8.36  | 4.56 | 0.42 | -999 |
| 6 | -68.84 | -114.51 | 8.82  | 4.33 | 0.44 | -999 |
| 6 | -68.76 | -113.88 | 8.60  | 4.21 | 0.47 | -999 |
| 6 | -68.68 | -113.25 | 9.25  | 4.34 | 0.48 | -999 |
| 6 | -68.53 | -112.81 | 9.04  | 4.11 | 0.61 | -999 |
| 6 | -68.33 | -112.50 | 8.66  | 4.26 | 0.54 | -999 |
| 6 | -68.13 | -112.19 | 8.89  | 3.94 | 0.50 | -999 |
| 6 | -67.98 | -111.76 | 9.54  | 4.75 | 0.52 | -999 |
| 6 | -67.93 | -111.13 | 8.52  | 4.37 | 0.51 | -999 |
| 6 | -67.87 | -110.51 | 8.77  | 4.15 | 0.69 | -999 |
| 6 | -67.82 | -109.88 | 7.52  | 4.03 | 0.56 | -999 |
| 6 | -67.77 | -109.26 | 7.54  | 4.04 | 0.59 | -999 |
| 6 | -67.71 | -108.64 | 7.15  | 4.30 | 0.55 | -999 |
| 6 | -67.66 | -108.02 | 6.78  | 4.74 | 0.57 | -999 |
| 6 | -67.65 | -107.45 | 7.87  | 4.14 | 0.73 | -999 |
| 6 | -67.87 | -107.15 | 8.22  | 4.34 | 0.69 | -999 |
| 6 | -68.01 | -106.80 | 7.75  | 4.08 | 0.65 | -999 |
| 6 | -67.87 | -106.27 | 7.77  | 4.30 | 0.56 | -999 |
| 6 | -67.87 | -105.80 | 9.00  | 4.38 | 0.56 | -999 |
| 6 | -68.09 | -105.50 | -999  | -999 | -999 | -999 |
| 6 | -68.30 | -105.18 | 8.33  | 3.54 | 0.56 | -999 |
| 6 | -68.51 | -104.90 | 8.35  | 3.74 | 0.58 | -999 |
| 6 | -68.60 | -104.46 | 8.00  | 3.98 | 0.54 | -999 |
| 6 | -68.51 | -103.84 | 8.29  | 3.94 | 0.50 | -999 |
| 6 | -68.43 | -103.25 | 7.76  | 3.65 | 0.57 | -999 |
| 6 | -68.34 | -102.64 | 8.26  | 3.73 | 0.54 | -999 |
| 6 | -68.26 | -102.03 | 7.83  | 3.57 | 0.65 | -999 |
| 6 | -68.07 | -102.05 | 9.61  | 3.88 | 0.59 | -999 |
| 6 | -67.85 | -102.30 | 10.34 | 3.77 | 0.57 | -999 |
| 6 | -67.63 | -102.54 | 9.51  | 3.93 | 0.60 | -999 |
| 6 | -67.31 | -102.92 | 9.97  | 4.02 | 0.59 | -999 |
| 6 | -67.11 | -102.98 | 10.52 | 4.28 | 0.57 | -999 |
| 6 | -67.00 | -102.46 | 11.48 | 4.27 | 0.71 | -999 |
| 6 | -66.83 | -102.42 | 9.62  | 3.77 | 0.66 | -999 |
| 6 | -66.61 | -102.70 | 9.94  | 4.03 | 0.64 | -999 |
| 6 | -66.40 | -103.00 | 11.41 | 4.50 | 0.62 | -999 |
| 6 | -66.26 | -102.70 | 9.05  | 4.11 | 0.57 | -999 |
| 6 | -66.14 | -102.25 | 8.12  | 3.23 | 0.54 | -999 |
| 6 | -66.02 | -101.80 | 7.32  | 2.61 | 0.55 | -999 |

|   |        |         |       |      |      |      |
|---|--------|---------|-------|------|------|------|
| 6 | -65.90 | -101.37 | 9.07  | 1.90 | 0.49 | -999 |
| 6 | -65.77 | -100.95 | 9.69  | 1.44 | 0.62 | -999 |
| 6 | -65.64 | -100.54 | 9.33  | 1.56 | 0.65 | -999 |
| 6 | -65.51 | -100.12 | 9.14  | 2.02 | 0.69 | -999 |
| 6 | -65.39 | -99.72  | 10.17 | 2.28 | 0.59 | -999 |
| 6 | -65.26 | -99.31  | 10.12 | 2.83 | 0.58 | -999 |
| 6 | -65.13 | -98.91  | 9.67  | 3.90 | 0.59 | -999 |
| 6 | -65.00 | -98.51  | 10.02 | 3.42 | 0.61 | -999 |
| 6 | -64.75 | -97.71  | 9.56  | 3.80 | 0.56 | -999 |
| 6 | -64.62 | -97.32  | 8.92  | 3.28 | 0.56 | -999 |
| 6 | -64.49 | -96.91  | 8.34  | 3.37 | 0.54 | -999 |
| 6 | -64.36 | -96.52  | 7.59  | 2.78 | 0.59 | -999 |
| 6 | -64.23 | -96.13  | 6.07  | 2.39 | 0.60 | -999 |
| 6 | -64.10 | -95.73  | 6.69  | 3.03 | 0.58 | -999 |
| 6 | -63.97 | -95.33  | 6.96  | 2.91 | 0.65 | -999 |
| 6 | -63.84 | -94.94  | 6.55  | 3.06 | 0.64 | -999 |
| 6 | -63.58 | -94.54  | 6.05  | 3.40 | 0.65 | -999 |
| 6 | -63.42 | -94.91  | 5.81  | 3.60 | 0.58 | -999 |
| 6 | -63.26 | -95.29  | 5.89  | 3.16 | 0.60 | -999 |
| 6 | -63.09 | -95.66  | 8.93  | 4.59 | 0.78 | -999 |
| 6 | -62.93 | -96.03  | 9.12  | 4.51 | 0.86 | -999 |
| 6 | -62.77 | -96.40  | 7.34  | 4.49 | 0.94 | -999 |
| 6 | -62.61 | -96.76  | 6.55  | 4.04 | 1.03 | -999 |
| 6 | -62.45 | -97.12  | 5.43  | 3.68 | 1.09 | -999 |
| 6 | -62.29 | -97.48  | 5.30  | 3.45 | 1.09 | -999 |
| 6 | -62.12 | -97.84  | 5.13  | 4.08 | 1.09 | -999 |
| 6 | -61.96 | -98.20  | 4.75  | 3.61 | 0.97 | -999 |
| 6 | -61.80 | -98.56  | 5.24  | 3.73 | 1.03 | -999 |
| 6 | -61.64 | -98.91  | 5.23  | 3.57 | 0.96 | -999 |
| 6 | -61.47 | -99.27  | 5.30  | 3.76 | 0.96 | -999 |
| 6 | -61.32 | -99.61  | 6.32  | 3.97 | 1.07 | -999 |
| 6 | -61.16 | -99.94  | 6.40  | 3.44 | 0.99 | -999 |
| 6 | -61.03 | -99.55  | 6.86  | 3.96 | 1.07 | -999 |
| 6 | -60.90 | -99.12  | 6.42  | 4.03 | 1.03 | -999 |
| 6 | -60.77 | -98.69  | 6.02  | 3.68 | 1.23 | -999 |
| 6 | -60.64 | -98.26  | 5.39  | 3.68 | 1.26 | -999 |
| 6 | -60.52 | -97.85  | 5.41  | 3.57 | 1.27 | -999 |
| 6 | -60.40 | -97.43  | 3.86  | 2.93 | 1.39 | -999 |
| 6 | -60.28 | -97.04  | 3.66  | 3.10 | 1.26 | -999 |
| 6 | -60.18 | -96.63  | 3.66  | 2.93 | 1.26 | -999 |
| 6 | -60.32 | -96.27  | 3.15  | 2.80 | 1.25 | -999 |
| 6 | -60.47 | -95.90  | 3.73  | 3.16 | 1.24 | -999 |
| 6 | -60.62 | -95.55  | 4.30  | 3.53 | 1.11 | -999 |
| 6 | -60.77 | -95.19  | 4.86  | 3.91 | 1.04 | -999 |
| 6 | -60.92 | -94.82  | 5.45  | 4.09 | 0.96 | -999 |
| 6 | -61.08 | -94.43  | 5.50  | 3.97 | 1.01 | -999 |
| 6 | -61.23 | -94.04  | -999  | -999 | -999 | -999 |

|   |        |        |       |      |      |      |
|---|--------|--------|-------|------|------|------|
| 6 | -61.35 | -93.59 | 5.85  | 3.79 | 1.08 | -999 |
| 6 | -61.47 | -93.14 | 6.28  | 4.14 | 0.93 | -999 |
| 6 | -61.58 | -92.69 | 5.95  | 3.85 | 0.96 | -999 |
| 6 | -61.70 | -92.25 | 7.49  | 4.19 | 0.91 | -999 |
| 6 | -61.77 | -91.78 | 7.92  | 3.93 | 0.80 | -999 |
| 6 | -61.77 | -91.28 | 6.59  | 3.85 | 0.72 | -999 |
| 6 | -61.77 | -90.78 | 7.46  | 3.95 | 0.62 | -999 |
| 6 | -61.86 | -90.34 | 9.39  | 4.29 | 0.71 | -999 |
| 6 | -61.99 | -89.91 | 9.11  | 4.16 | 0.97 | -999 |
| 6 | -62.12 | -89.47 | 8.45  | 3.73 | 0.80 | -999 |
| 6 | -62.25 | -89.04 | 8.64  | 3.89 | 0.94 | -999 |
| 6 | -62.38 | -88.60 | 7.98  | 3.87 | 0.95 | -999 |
| 6 | -62.51 | -88.15 | 8.31  | 3.55 | 0.93 | -999 |
| 6 | -62.65 | -87.68 | 8.50  | 3.83 | 0.73 | -999 |
| 6 | -62.80 | -87.16 | 8.42  | 3.79 | 0.90 | -999 |
| 6 | -62.93 | -86.69 | 8.69  | 3.88 | 0.96 | -999 |
| 6 | -63.07 | -86.21 | 8.93  | 3.74 | 0.90 | -999 |
| 6 | -63.01 | -85.82 | 8.18  | 3.67 | 0.70 | -999 |
| 6 | -62.83 | -85.56 | 10.36 | 3.68 | 0.80 | -999 |
| 6 | -62.65 | -85.30 | 8.77  | 4.15 | 0.94 | -999 |
| 6 | -62.50 | -85.03 | 9.00  | 4.52 | 0.88 | -999 |
| 6 | -62.38 | -84.65 | 8.22  | 3.42 | 0.81 | -999 |
| 6 | -62.25 | -84.25 | 8.83  | 3.63 | 0.95 | -999 |
| 6 | -62.12 | -83.83 | 8.21  | 3.73 | 0.88 | -999 |
| 6 | -61.98 | -83.40 | 8.30  | 4.34 | 0.92 | -999 |
| 6 | -61.85 | -82.96 | 7.56  | 3.45 | 0.87 | -999 |
| 6 | -61.71 | -82.54 | 7.99  | 3.42 | 0.93 | -999 |
| 6 | -61.58 | -82.11 | 7.49  | 4.34 | 0.91 | -999 |
| 6 | -61.45 | -81.69 | 7.00  | 4.03 | 0.90 | -999 |
| 6 | -61.31 | -81.28 | 6.60  | 4.23 | 1.09 | -999 |
| 6 | -61.18 | -80.87 | 7.19  | 2.15 | 0.93 | -999 |
| 6 | -60.97 | -80.22 | 7.36  | 2.17 | 1.05 | -999 |
| 6 | -60.84 | -79.82 | 7.31  | 2.66 | 1.05 | -999 |
| 6 | -60.70 | -79.40 | 7.71  | -999 | 1.29 | -999 |
| 6 | -60.57 | -78.98 | 6.81  | 2.07 | 1.44 | -999 |
| 6 | -60.43 | -78.57 | 6.62  | 2.27 | 1.49 | -999 |
| 6 | -60.29 | -78.16 | 5.75  | 3.66 | 1.55 | -999 |
| 6 | -60.15 | -77.74 | 5.09  | 3.27 | 1.54 | -999 |
| 6 | -60.02 | -77.33 | 6.08  | 3.37 | 1.40 | -999 |
| 6 | -59.88 | -76.93 | 5.93  | 3.35 | 1.34 | -999 |
| 6 | -59.75 | -76.54 | 6.65  | 3.54 | 1.50 | -999 |
| 6 | -59.61 | -76.14 | 6.53  | 3.15 | 1.53 | -999 |
| 6 | -59.48 | -75.74 | 7.00  | 3.41 | 1.32 | -999 |
| 6 | -59.34 | -75.35 | 5.81  | 3.46 | 1.31 | -999 |
| 6 | -59.22 | -74.98 | 5.26  | 3.46 | 1.24 | -999 |
| 6 | -59.09 | -74.64 | 7.57  | 3.60 | 1.35 | -999 |
| 6 | -58.98 | -74.31 | 5.41  | 3.40 | 1.73 | -999 |

|   |        |        |       |       |      |      |
|---|--------|--------|-------|-------|------|------|
| 6 | -58.85 | -73.91 | 5.13  | 3.80  | 1.63 | -999 |
| 6 | -58.71 | -73.51 | 4.83  | 3.37  | 1.51 | -999 |
| 6 | -58.57 | -73.12 | 5.31  | 2.75  | 1.46 | -999 |
| 6 | -58.43 | -72.70 | 3.84  | 3.17  | 1.67 | -999 |
| 6 | -58.29 | -72.30 | 7.16  | 3.65  | 0.62 | -999 |
| 6 | -58.15 | -71.91 | 3.60  | 2.56  | 2.05 | -999 |
| 6 | -58.01 | -71.51 | 3.98  | 3.07  | 2.26 | -999 |
| 6 | -57.87 | -71.13 | -999  | -999  | 2.04 | -999 |
| 6 | -57.73 | -70.76 | 2.95  | 2.40  | 2.01 | -999 |
| 6 | -57.58 | -70.39 | 2.91  | 2.87  | 1.73 | -999 |
| 6 | -57.43 | -70.02 | 2.99  | 2.57  | 1.51 | -999 |
| 6 | -57.28 | -69.65 | 2.65  | 2.01  | 1.68 | -999 |
| 6 | -57.14 | -69.28 | 2.61  | 2.08  | 1.62 | -999 |
| 6 | -56.99 | -68.91 | 2.66  | 2.60  | 1.69 | -999 |
| 6 | -56.84 | -68.54 | 2.82  | 2.10  | 1.92 | -999 |
| 6 | -56.70 | -68.17 | 5.65  | 4.00  | 1.99 | -999 |
| 6 | -56.55 | -67.80 | 3.30  | 2.74  | 1.67 | -999 |
| 6 | -56.40 | -67.45 | 4.51  | 3.48  | 1.97 | -999 |
| 6 | -56.23 | -67.16 | 5.92  | 3.72  | 1.96 | -999 |
| 6 | -56.06 | -66.84 | 6.98  | 4.47  | 2.12 | -999 |
| 6 | -55.84 | -66.45 | 4.04  | 2.68  | 1.79 | -999 |
| 6 | -55.63 | -66.08 | 4.78  | 3.12  | 1.99 | -999 |
| 6 | -55.42 | -65.70 | 3.82  | 2.97  | 1.92 | -999 |
| 6 | -55.04 | -65.04 | 5.34  | 3.13  | 1.92 | -999 |
| 6 | -54.81 | -64.97 | 21.38 | 6.91  | 2.50 | -999 |
| 6 | -54.65 | -64.96 | 23.37 | 7.74  | 3.10 | -999 |
| 6 | -54.48 | -65.09 | 27.85 | 10.49 | 3.47 | -999 |
| 6 | -54.14 | -65.68 | 18.93 | 7.54  | 2.94 | -999 |
| 6 | -53.95 | -66.01 | 15.64 | 4.59  | 2.51 | -999 |
| 6 | -53.55 | -66.68 | 18.70 | 3.21  | 2.33 | -999 |
| 6 | -53.38 | -66.97 | 14.54 | 3.24  | 4.57 | -999 |
| 6 | -53.25 | -67.18 | 12.80 | 3.13  | 4.58 | -999 |
| 6 | -53.13 | -67.39 | 12.59 | 2.80  | 3.96 | -999 |
| 7 | -46.90 | 141.96 | 5.44  | 3.02  | 2.30 | -999 |
| 7 | -46.79 | 142.05 | 5.53  | 3.68  | 2.49 | -999 |
| 7 | -46.82 | 141.93 | 5.54  | 3.35  | 2.76 | -999 |
| 7 | -46.79 | 141.58 | 3.17  | 2.84  | 2.58 | -999 |
| 7 | -46.70 | 141.09 | 2.60  | 2.76  | 2.21 | -999 |
| 7 | -46.91 | 142.04 | 9.93  | 4.73  | 3.62 | -999 |
| 7 | -46.90 | 142.03 | 10.11 | 4.89  | 3.63 | -999 |
| 7 | -46.88 | 142.00 | 10.01 | 4.60  | 3.81 | -999 |
| 7 | -46.87 | 141.99 | 10.75 | 4.74  | 4.17 | -999 |
| 7 | -47.44 | 144.88 | 2.56  | 3.03  | 2.81 | -999 |
| 7 | -47.79 | 144.73 | 7.31  | 2.96  | 2.14 | -999 |
| 7 | -49.27 | 144.12 | 4.01  | 3.20  | 3.64 | -999 |
| 7 | -50.41 | 143.44 | 3.17  | 3.02  | 3.43 | -999 |
| 7 | -51.00 | 143.42 | 3.16  | 3.00  | 3.45 | -999 |

|   |        |         |       |      |      |      |
|---|--------|---------|-------|------|------|------|
| 7 | -52.09 | 142.72  | 4.03  | 3.42 | 2.50 | -999 |
| 7 | -53.13 | 142.16  | 4.37  | 3.64 | 2.42 | -999 |
| 7 | -53.74 | 141.85  | 8.94  | 4.00 | 2.70 | -999 |
| 7 | -53.78 | 141.95  | 6.93  | 3.98 | 2.53 | -999 |
| 7 | -54.54 | 141.35  | 6.00  | 4.35 | 3.32 | -999 |
| 7 | -55.91 | 140.42  | 4.00  | 3.72 | 1.75 | -999 |
| 7 | -57.85 | 139.84  | 5.70  | 4.56 | 2.03 | -999 |
| 7 | -59.35 | 139.86  | 6.09  | 4.06 | 1.86 | -999 |
| 7 | -60.84 | 139.87  | 6.83  | 4.36 | 1.41 | -999 |
| 7 | -61.31 | 139.88  | 5.53  | 4.70 | 1.69 | -999 |
| 7 | -62.83 | 139.86  | 27.53 | 4.33 | 1.57 | -999 |
| 7 | -63.85 | 140.01  | 10.70 | 4.66 | 1.25 | -999 |
| 7 | -64.17 | 140.43  | 9.66  | 4.58 | 1.30 | -999 |
| 7 | -65.02 | 142.44  | 11.23 | 4.42 | 1.28 | -999 |
| 7 | -65.54 | 143.18  | 9.68  | 4.35 | 1.26 | -999 |
| 7 | -65.77 | 142.97  | 6.48  | 4.21 | 1.00 | -999 |
| 7 | -66.00 | 143.17  | 7.87  | 4.95 | 0.93 | -999 |
| 7 | -66.59 | 144.25  | 6.09  | 4.63 | 1.33 | -999 |
| 7 | -66.38 | 144.30  | 6.81  | 4.57 | 1.18 | -999 |
| 7 | -65.92 | 144.50  | 6.76  | 4.46 | 1.12 | -999 |
| 7 | -66.34 | 141.76  | 10.26 | 6.11 | 0.75 | -999 |
| 7 | -66.56 | 141.47  | 14.19 | 7.10 | 1.41 | -999 |
| 7 | -66.56 | 141.47  | 12.92 | 7.43 | 1.12 | -999 |
| 7 | -65.67 | 141.20  | 8.43  | 5.01 | 1.90 | -999 |
| 7 | -65.32 | 141.29  | 7.59  | 5.13 | 1.57 | -999 |
| 7 | -64.87 | 139.86  | 8.35  | 5.56 | 1.25 | -999 |
| 7 | -63.91 | 139.84  | 9.78  | 4.45 | 1.25 | -999 |
| 7 | -60.83 | 139.93  | 9.73  | 4.74 | 1.33 | -999 |
| 7 | -51.00 | 143.32  | 5.46  | 3.09 | 4.03 | -999 |
| 8 | 10.79  | 173.08  | 1.21  | 0.72 | 0.56 | -999 |
| 8 | 10.88  | 173.32  | 1.45  | 0.84 | 0.73 | -999 |
| 8 | 11.05  | 173.80  | 1.62  | 0.67 | 0.66 | -999 |
| 8 | 11.14  | 174.03  | 1.48  | 0.72 | 0.79 | -999 |
| 8 | 11.32  | 174.51  | 1.02  | 0.49 | 0.68 | -999 |
| 8 | 11.41  | 174.75  | 1.14  | 0.61 | 0.76 | -999 |
| 8 | 11.58  | 175.21  | 0.97  | 0.50 | 0.72 | -999 |
| 8 | 11.67  | 175.45  | 1.14  | 0.63 | 0.77 | -999 |
| 8 | 13.61  | -179.25 | -999  | -999 | -999 | -999 |
| 8 | 13.73  | -178.93 | -999  | -999 | -999 | -999 |
| 8 | 13.90  | -178.45 | -999  | -999 | -999 | -999 |
| 8 | 14.02  | -178.13 | -999  | -999 | -999 | -999 |
| 8 | 14.20  | -177.64 | -999  | -999 | -999 | -999 |
| 8 | 14.32  | -177.31 | -999  | -999 | -999 | -999 |
| 8 | 14.50  | -176.81 | -999  | -999 | -999 | -999 |
| 8 | 14.62  | -176.48 | -999  | -999 | -999 | -999 |
| 8 | 14.81  | -175.97 | -999  | -999 | -999 | -999 |
| 8 | 14.93  | -175.64 | -999  | -999 | -999 | -999 |

|   |       |         |      |      |      |      |
|---|-------|---------|------|------|------|------|
| 8 | 15.11 | -175.14 | -999 | -999 | -999 | -999 |
| 8 | 15.22 | -174.84 | -999 | -999 | -999 | -999 |
| 8 | 15.38 | -174.39 | -999 | -999 | -999 | -999 |
| 8 | 15.49 | -174.09 | -999 | -999 | -999 | -999 |
| 8 | 15.65 | -173.65 | -999 | -999 | -999 | -999 |
| 8 | 15.77 | -173.35 | -999 | -999 | -999 | -999 |
| 8 | 15.93 | -172.89 | -999 | -999 | -999 | -999 |
| 8 | 16.04 | -172.58 | -999 | -999 | -999 | -999 |
| 8 | 16.21 | -172.12 | -999 | -999 | -999 | -999 |
| 8 | 16.32 | -171.81 | -999 | -999 | -999 | -999 |
| 8 | 16.49 | -171.35 | -999 | -999 | -999 | -999 |
| 8 | 16.60 | -171.04 | -999 | -999 | -999 | -999 |
| 8 | 16.77 | -170.56 | -999 | -999 | -999 | -999 |
| 8 | 16.89 | -170.24 | -999 | -999 | -999 | -999 |
| 8 | 17.04 | -169.81 | -999 | -999 | -999 | -999 |
| 8 | 17.14 | -169.53 | -999 | -999 | -999 | -999 |
| 8 | 17.29 | -169.12 | -999 | -999 | -999 | -999 |
| 8 | 17.54 | -168.42 | -999 | -999 | -999 | -999 |
| 8 | 17.64 | -168.14 | -999 | -999 | -999 | -999 |
| 8 | 17.79 | -167.72 | -999 | -999 | -999 | -999 |
| 8 | 17.90 | -167.43 | -999 | -999 | -999 | -999 |
| 8 | 18.05 | -167.00 | -999 | -999 | -999 | -999 |
| 8 | 18.16 | -166.71 | -999 | -999 | -999 | -999 |
| 8 | 18.31 | -166.27 | -999 | -999 | -999 | -999 |
| 8 | 18.41 | -165.98 | -999 | -999 | -999 | -999 |
| 8 | 18.57 | -165.55 | -999 | -999 | -999 | -999 |
| 8 | 18.66 | -165.30 | -999 | -999 | -999 | -999 |
| 8 | 18.80 | -164.92 | -999 | -999 | -999 | -999 |
| 8 | 18.89 | -164.66 | -999 | -999 | -999 | -999 |
| 8 | 19.02 | -164.28 | -999 | -999 | -999 | -999 |
| 8 | 19.11 | -164.04 | -999 | -999 | -999 | -999 |
| 8 | 19.23 | -163.70 | 3.49 | 0.54 | 1.06 | -999 |
| 8 | 19.29 | -163.52 | 4.04 | 0.74 | 0.92 | -999 |
| 8 | 19.42 | -163.17 | 3.17 | 0.72 | 1.02 | -999 |
| 8 | 19.48 | -163.00 | 3.57 | 0.66 | 0.97 | -999 |
| 8 | 19.60 | -162.66 | 1.38 | 0.78 | 0.92 | -999 |
| 8 | 19.66 | -162.49 | 1.22 | 0.70 | 1.00 | -999 |
| 8 | 19.79 | -162.12 | 1.13 | 0.68 | 0.92 | -999 |
| 8 | 19.86 | -161.93 | 1.19 | 0.79 | 1.36 | -999 |
| 8 | 19.98 | -161.58 | 1.33 | 0.73 | 0.97 | -999 |
| 8 | 20.04 | -161.41 | 1.35 | 0.75 | 1.19 | -999 |
| 8 | 20.17 | -161.04 | 3.20 | 0.94 | 1.50 | -999 |
| 8 | 20.24 | -160.86 | 3.05 | 0.89 | 1.20 | -999 |
| 8 | 20.37 | -160.50 | 2.21 | 0.67 | 0.79 | -999 |
| 8 | 20.43 | -160.32 | 1.89 | 0.76 | 1.10 | -999 |
| 8 | 20.55 | -159.97 | 1.11 | 0.73 | 1.02 | -999 |
| 8 | 20.62 | -159.79 | 1.23 | 0.78 | 1.53 | -999 |

|   |       |         |      |      |      |      |
|---|-------|---------|------|------|------|------|
| 8 | 20.74 | -159.44 | 0.94 | 0.71 | 1.37 | -999 |
| 8 | 20.80 | -159.27 | 1.00 | 0.70 | 1.41 | -999 |
| 8 | 20.92 | -158.92 | 1.03 | 0.69 | 1.10 | -999 |
| 8 | 20.98 | -158.75 | 1.37 | 0.74 | 1.58 | -999 |
| 8 | 21.10 | -158.41 | 0.96 | 0.54 | 1.27 | -999 |
| 8 | 21.16 | -158.23 | 1.15 | 0.75 | 1.57 | -999 |
| 8 | 21.24 | -158.01 | 4.92 | 1.78 | 1.51 | -999 |
| 8 | 21.62 | -158.39 | 3.69 | 0.85 | 2.49 | -999 |
| 8 | 21.85 | -158.50 | 3.70 | 1.03 | 1.89 | -999 |
| 8 | 22.29 | -158.70 | 4.33 | 1.43 | 2.05 | -999 |
| 8 | 22.51 | -158.80 | 2.67 | 1.07 | 1.88 | -999 |
| 8 | 22.94 | -159.01 | 2.11 | 1.04 | 2.83 | -999 |
| 8 | 23.16 | -159.11 | 2.44 | 1.09 | 2.61 | -999 |
| 8 | 23.60 | -159.32 | 1.66 | 0.89 | 2.78 | -999 |
| 8 | 23.83 | -159.43 | 1.68 | 0.98 | 2.66 | -999 |
| 8 | 24.27 | -159.64 | 1.66 | 0.86 | 2.69 | -999 |
| 8 | 24.48 | -159.74 | 1.72 | 0.89 | 2.76 | -999 |
| 8 | 24.92 | -159.95 | 1.61 | 0.86 | 2.84 | -999 |
| 8 | 25.14 | -160.05 | 1.38 | 0.84 | 2.82 | -999 |
| 8 | 25.56 | -160.25 | 1.50 | 0.86 | 2.98 | -999 |
| 8 | 25.77 | -160.36 | 1.50 | 0.87 | 2.86 | -999 |
| 8 | 26.22 | -160.57 | 1.53 | 0.88 | 3.04 | -999 |
| 8 | 26.44 | -160.68 | 1.67 | 0.91 | 3.01 | -999 |
| 8 | 26.87 | -160.89 | 1.66 | 0.95 | 3.02 | -999 |
| 8 | 27.09 | -160.99 | 1.65 | 0.92 | 2.85 | -999 |
| 8 | 27.52 | -161.20 | 1.61 | 0.96 | 2.69 | -999 |
| 8 | 27.73 | -161.31 | 1.36 | 0.85 | 2.59 | -999 |
| 8 | 28.16 | -161.52 | 1.34 | 0.84 | 2.66 | -999 |
| 8 | 28.37 | -161.62 | 1.49 | 0.83 | 2.78 | -999 |
| 8 | 28.79 | -161.83 | 1.52 | 0.84 | 3.15 | -999 |
| 8 | 29.01 | -161.94 | 1.46 | 0.88 | 2.97 | -999 |
| 8 | 29.45 | -162.15 | 1.49 | 0.85 | 2.54 | -999 |
| 8 | 29.66 | -162.26 | 1.54 | 0.88 | 2.73 | -999 |
| 8 | 30.08 | -162.47 | 1.86 | 0.89 | 2.64 | -999 |
| 8 | 30.30 | -162.58 | 1.62 | 0.88 | 2.45 | -999 |
| 8 | 30.74 | -162.80 | 1.32 | 0.85 | 1.82 | -999 |
| 8 | 30.96 | -162.91 | 1.36 | 0.82 | 1.93 | -999 |
| 8 | 31.38 | -163.12 | 1.44 | 0.83 | 2.20 | -999 |
| 8 | 31.59 | -163.24 | 1.52 | 0.86 | 2.28 | -999 |
| 8 | 32.01 | -163.45 | 1.64 | 0.87 | 2.18 | -999 |
| 8 | 32.21 | -163.55 | -999 | -999 | -999 | -999 |
| 8 | 32.83 | -163.87 | 1.60 | 0.85 | 2.22 | -999 |
| 8 | 33.05 | -163.98 | 1.64 | 0.89 | 2.30 | -999 |
| 8 | 33.46 | -164.19 | 1.32 | 0.85 | 1.98 | -999 |
| 8 | 33.66 | -164.30 | 1.34 | 0.88 | 2.04 | -999 |
| 8 | 34.06 | -164.51 | 1.28 | 0.89 | 1.78 | -999 |
| 8 | 34.26 | -164.61 | -999 | -999 | -999 | -999 |

|   |       |         |      |      |      |      |
|---|-------|---------|------|------|------|------|
| 8 | 34.66 | -164.82 | 1.48 | 1.00 | 1.96 | -999 |
| 8 | 34.86 | -164.92 | 1.56 | 1.07 | 1.90 | -999 |
| 8 | 34.90 | -164.92 | 1.42 | 1.05 | 1.69 | -999 |
| 8 | 34.93 | -164.92 | 1.39 | 1.01 | 1.69 | -999 |
| 8 | 34.99 | -164.91 | 1.40 | 1.04 | 1.63 | -999 |
| 8 | 34.94 | -164.96 | 1.35 | 1.04 | 1.67 | -999 |
| 8 | 34.94 | -164.90 | 1.42 | 0.98 | 1.67 | -999 |
| 8 | 34.94 | -164.90 | 1.44 | 0.99 | 1.58 | -999 |
| 8 | 34.94 | -164.90 | 1.44 | 1.02 | 1.61 | -999 |
| 8 | 34.97 | -164.94 | 1.42 | 1.00 | 1.72 | -999 |
| 8 | 35.39 | -165.00 | 1.74 | 1.15 | 1.86 | -999 |
| 8 | 35.61 | -165.00 | 1.63 | 1.14 | 1.89 | -999 |
| 8 | 36.07 | -165.00 | 1.57 | 1.18 | 1.80 | -999 |
| 8 | 36.30 | -165.00 | 2.55 | 1.37 | 1.88 | -999 |
| 8 | 36.75 | -165.00 | 1.14 | 1.16 | 1.79 | -999 |
| 8 | 36.98 | -165.00 | 1.17 | 1.25 | 1.95 | -999 |
| 8 | 37.42 | -165.00 | 1.23 | 1.37 | 1.62 | -999 |
| 8 | 37.65 | -165.00 | 1.23 | 1.54 | 1.58 | -999 |
| 8 | 38.11 | -165.00 | 1.21 | 1.51 | 1.68 | -999 |
| 8 | 38.34 | -165.00 | 1.27 | 1.47 | 1.78 | -999 |
| 8 | 38.80 | -165.00 | 1.43 | 1.70 | 2.20 | -999 |
| 8 | 39.03 | -165.00 | 1.39 | 1.66 | 2.48 | -999 |
| 8 | 39.50 | -165.00 | 1.33 | 1.62 | 2.30 | -999 |
| 8 | 39.73 | -165.00 | 1.33 | 1.57 | 2.17 | -999 |
| 8 | 40.18 | -165.00 | 1.35 | 1.68 | 2.88 | -999 |
| 8 | 40.41 | -165.00 | 1.50 | 1.93 | 3.26 | -999 |
| 8 | 40.89 | -165.00 | 1.25 | 1.94 | 2.89 | -999 |
| 8 | 41.12 | -165.00 | 1.20 | 1.94 | 2.32 | -999 |
| 8 | 41.58 | -165.00 | 1.24 | 1.86 | 2.31 | -999 |
| 8 | 41.81 | -165.00 | 1.23 | 1.98 | 2.52 | -999 |
| 8 | 42.24 | -165.00 | 1.30 | 1.87 | 2.09 | -999 |
| 8 | 42.47 | -165.00 | 1.24 | 1.85 | 2.02 | -999 |
| 8 | 42.94 | -165.00 | 1.68 | 1.88 | 2.12 | -999 |
| 8 | 43.17 | -165.00 | 1.26 | 1.88 | 1.97 | -999 |
| 8 | 43.66 | -165.00 | 1.26 | 1.91 | 2.24 | -999 |
| 8 | 43.90 | -165.00 | 1.21 | 2.02 | 2.47 | -999 |
| 8 | 44.38 | -165.00 | 1.27 | 2.27 | 2.67 | -999 |
| 8 | 44.60 | -165.00 | 1.28 | 2.27 | 2.73 | -999 |
| 8 | 45.02 | -165.00 | 1.42 | 2.49 | 3.42 | -999 |
| 8 | 45.23 | -165.00 | -999 | -999 | 3.98 | -999 |
| 8 | 45.68 | -165.00 | 1.89 | 2.95 | 4.21 | -999 |
| 8 | 45.91 | -165.00 | 1.82 | 2.93 | 3.99 | -999 |
| 8 | 46.37 | -165.00 | 1.58 | 2.56 | 2.76 | -999 |
| 8 | 46.59 | -165.00 | 1.51 | 2.45 | 2.91 | -999 |
| 8 | 47.02 | -165.00 | 1.34 | 2.34 | 3.00 | -999 |
| 8 | 47.24 | -165.00 | 1.36 | 2.52 | 2.64 | -999 |
| 8 | 47.71 | -165.00 | 1.26 | 2.69 | 3.28 | -999 |



|   |       |         |       |       |      |      |
|---|-------|---------|-------|-------|------|------|
| 8 | 47.93 | -165.00 | 1.34  | 2.62  | 3.38 | -999 |
| 8 | 48.38 | -165.00 | 1.28  | 2.59  | 2.80 | -999 |
| 8 | 48.61 | -165.00 | 1.30  | 2.59  | 2.96 | -999 |
| 8 | 49.07 | -165.00 | 1.26  | 2.51  | 2.96 | -999 |
| 8 | 49.29 | -165.00 | 1.25  | 2.63  | 2.86 | -999 |
| 8 | 49.75 | -165.00 | 1.54  | 2.84  | 2.80 | -999 |
| 8 | 49.98 | -165.00 | 1.78  | 2.87  | 2.74 | -999 |
| 8 | 50.16 | -165.03 | 1.80  | 3.02  | 2.77 | -999 |
| 8 | 50.38 | -165.11 | 1.56  | 2.74  | 2.97 | -999 |
| 8 | 50.50 | -165.13 | 1.57  | 2.66  | 2.87 | -999 |
| 8 | 50.57 | -164.87 | 1.59  | 2.67  | 3.28 | -999 |
| 8 | 50.51 | -164.88 | 1.52  | 2.68  | 2.79 | -999 |
| 8 | 50.53 | -164.87 | 1.53  | 2.75  | 2.89 | -999 |
| 8 | 50.53 | -164.94 | 1.54  | 2.80  | 2.72 | -999 |
| 8 | 50.54 | -164.95 | 1.56  | 2.81  | 2.71 | -999 |
| 8 | 50.53 | -164.93 | 1.54  | 2.78  | 2.91 | -999 |
| 8 | 50.51 | -164.94 | 1.51  | 2.63  | 2.94 | -999 |
| 8 | 50.89 | -165.11 | 1.63  | 2.84  | 2.71 | -999 |
| 8 | 51.13 | -165.18 | 1.63  | 2.87  | 2.72 | -999 |
| 8 | 51.58 | -165.31 | 1.74  | 2.66  | 2.51 | -999 |
| 8 | 51.81 | -165.38 | 1.58  | 2.75  | 2.76 | -999 |
| 8 | 52.28 | -165.52 | 1.69  | 3.09  | 3.17 | -999 |
| 8 | 52.51 | -165.58 | 1.81  | 3.08  | 2.80 | -999 |
| 8 | 52.94 | -165.72 | 1.91  | 2.98  | 3.25 | -999 |
| 8 | 53.16 | -165.78 | 2.53  | 3.29  | 3.12 | -999 |
| 8 | 53.58 | -165.91 | 5.55  | 6.54  | 2.15 | -999 |
| 8 | 53.78 | -165.97 | 10.27 | 10.02 | 3.94 | -999 |
| 8 | 54.33 | -165.74 | 9.75  | 10.19 | 4.01 | -999 |
| 8 | 54.29 | -165.39 | 7.60  | 7.41  | 3.26 | -999 |
| 8 | 54.09 | -164.66 | 11.30 | 12.33 | 4.01 | -999 |
| 8 | 54.03 | -164.28 | 10.28 | 8.89  | 2.41 | -999 |
| 8 | 53.88 | -163.55 | 5.31  | 5.99  | 1.51 | -999 |
| 8 | 53.80 | -163.19 | 5.47  | 6.92  | 2.61 | -999 |
| 8 | 53.63 | -162.51 | 3.82  | 4.60  | 3.23 | -999 |
| 8 | 53.57 | -162.16 | 3.09  | 4.11  | 3.33 | -999 |
| 8 | 53.42 | -161.44 | 2.39  | 3.56  | 2.94 | -999 |
| 8 | 53.34 | -161.06 | 2.36  | 3.58  | 2.93 | -999 |
| 8 | 53.17 | -160.30 | 2.24  | 3.23  | 3.84 | -999 |
| 8 | 53.10 | -159.98 | 2.06  | 2.94  | 2.67 | -999 |
| 8 | 52.86 | -158.88 | 2.15  | 2.94  | 3.03 | -999 |
| 8 | 52.71 | -158.18 | 2.19  | 2.91  | 3.31 | -999 |
| 8 | 52.63 | -157.83 | 1.80  | 2.97  | 2.97 | -999 |
| 8 | 52.64 | -157.30 | 1.66  | 2.86  | 2.65 | -999 |
| 8 | 52.63 | -157.36 | 1.70  | 2.85  | 2.83 | -999 |
| 8 | 52.63 | -157.42 | 1.75  | 2.94  | 2.83 | -999 |
| 8 | 52.64 | -157.21 | 1.75  | 3.05  | 2.77 | -999 |
| 8 | 52.66 | -156.90 | 1.66  | 3.06  | 2.76 | -999 |

|   |       |         |      |      |      |      |
|---|-------|---------|------|------|------|------|
| 8 | 52.67 | -156.89 | 1.76 | 2.98 | 2.81 | -999 |
| 8 | 52.66 | -156.94 | 1.82 | 3.02 | 2.68 | -999 |
| 8 | 52.64 | -156.97 | 1.70 | 3.02 | 2.68 | -999 |
| 8 | 52.60 | -157.03 | 1.53 | 3.21 | 2.65 | -999 |
| 8 | 52.60 | -157.06 | 1.43 | 3.03 | 2.62 | -999 |
| 8 | 52.63 | -157.11 | 1.56 | 2.63 | 2.55 | -999 |
| 8 | 52.63 | -157.13 | 1.70 | 3.08 | 2.66 | -999 |
| 8 | 52.67 | -156.88 | 1.67 | 3.02 | 2.64 | -999 |
| 8 | 52.67 | -156.88 | 1.60 | 2.99 | 2.63 | -999 |
| 8 | 52.66 | -156.91 | 1.57 | 3.04 | 2.54 | -999 |
| 8 | 52.65 | -156.95 | 1.52 | 2.92 | 2.49 | -999 |
| 8 | 52.65 | -156.89 | 1.57 | 2.77 | 2.46 | -999 |
| 8 | 52.65 | -156.92 | 1.57 | 2.81 | 2.50 | -999 |
| 8 | 52.56 | -156.83 | 1.55 | 2.86 | 2.54 | -999 |
| 8 | 52.44 | -156.61 | 1.54 | 2.86 | 2.60 | -999 |
| 8 | 52.16 | -156.24 | 1.59 | 2.81 | 2.74 | -999 |
| 8 | 52.12 | -156.34 | 1.62 | 2.78 | 2.38 | -999 |
| 8 | 52.06 | -156.60 | 1.67 | 2.82 | 2.53 | -999 |
| 8 | 52.07 | -156.71 | 1.66 | 2.92 | 2.39 | -999 |
| 8 | 52.15 | -156.92 | 1.62 | 2.92 | 2.62 | -999 |
| 8 | 52.09 | -156.75 | 1.61 | 3.01 | 2.58 | -999 |
| 8 | 52.10 | -156.79 | 1.53 | 2.91 | 2.71 | -999 |
| 8 | 52.10 | -156.80 | 1.65 | 2.91 | 2.74 | -999 |
| 8 | 52.08 | -156.75 | 1.61 | 2.86 | 2.61 | -999 |
| 8 | 52.09 | -156.73 | 1.65 | 2.87 | 2.29 | -999 |
| 8 | 52.09 | -156.64 | 1.67 | 2.78 | 2.23 | -999 |
| 8 | 52.09 | -156.65 | 1.60 | 2.75 | 2.15 | -999 |
| 8 | 52.10 | -156.67 | 1.55 | 2.85 | 2.13 | -999 |
| 8 | 52.09 | -156.66 | 1.61 | 2.83 | 2.10 | -999 |
| 8 | 52.08 | -156.69 | 1.50 | 2.81 | 2.42 | -999 |
| 8 | 52.08 | -156.69 | 1.48 | 2.92 | 2.55 | -999 |
| 8 | 52.08 | -156.69 | 1.50 | 2.83 | 2.56 | -999 |
| 8 | 52.08 | -156.69 | 1.47 | 2.92 | 2.56 | -999 |
| 8 | 52.08 | -156.69 | 1.52 | 2.78 | 2.30 | -999 |
| 8 | 52.08 | -156.67 | 1.48 | 2.72 | 2.21 | -999 |
| 8 | 52.08 | -156.65 | 1.45 | 2.90 | 2.31 | -999 |
| 8 | 52.08 | -156.65 | 1.46 | 2.97 | 2.38 | -999 |
| 8 | 51.96 | -155.95 | 1.53 | 2.91 | 2.30 | -999 |
| 8 | 51.89 | -155.55 | 1.53 | 2.93 | 2.15 | -999 |
| 8 | 51.75 | -154.77 | 1.59 | 2.88 | 2.28 | -999 |
| 8 | 51.69 | -154.39 | 1.52 | 2.96 | 2.31 | -999 |
| 8 | 51.55 | -153.60 | 1.41 | 2.89 | 2.39 | -999 |
| 8 | 51.48 | -153.21 | 1.41 | 2.85 | 2.26 | -999 |
| 8 | 51.34 | -152.43 | 1.44 | 2.84 | 2.23 | -999 |
| 8 | 51.27 | -152.04 | 1.57 | 2.74 | 2.64 | -999 |
| 8 | 51.13 | -151.28 | 1.70 | 2.80 | 2.33 | -999 |
| 8 | 51.07 | -150.90 | 1.54 | 2.71 | 2.22 | -999 |

|   |       |         |      |      |      |      |
|---|-------|---------|------|------|------|------|
| 8 | 50.93 | -150.14 | 1.58 | 2.76 | 2.14 | -999 |
| 8 | 50.86 | -149.76 | 1.54 | 2.79 | 2.00 | -999 |
| 8 | 50.73 | -149.03 | 1.52 | 2.71 | 2.16 | -999 |
| 8 | 50.73 | -148.99 | 1.50 | 2.67 | 2.07 | -999 |
| 8 | 50.75 | -149.06 | 1.61 | 2.62 | 2.10 | -999 |
| 8 | 50.75 | -149.04 | 1.60 | 2.61 | 2.17 | -999 |
| 8 | 50.62 | -148.42 | 1.43 | 2.55 | 2.82 | -999 |
| 8 | 50.55 | -148.03 | 1.34 | 2.58 | 2.68 | -999 |
| 8 | 50.41 | -147.26 | 1.30 | 2.56 | 2.75 | -999 |
| 8 | 50.34 | -146.89 | 1.30 | 2.58 | 2.84 | -999 |
| 8 | 50.21 | -146.14 | 1.25 | 2.62 | 2.72 | -999 |
| 8 | 50.14 | -145.76 | 1.25 | 2.55 | 2.71 | -999 |
| 8 | 50.00 | -145.02 | 1.22 | 2.52 | 2.51 | -999 |
| 8 | 50.00 | -145.00 | 1.31 | 2.52 | 2.48 | -999 |
| 8 | 50.00 | -145.00 | 1.29 | 2.45 | 2.50 | -999 |
| 8 | 50.00 | -145.00 | 1.29 | 2.47 | 2.50 | -999 |
| 8 | 50.01 | -144.94 | 1.30 | 2.52 | 2.44 | -999 |
| 8 | 50.04 | -144.83 | 1.30 | 2.66 | 2.46 | -999 |
| 8 | 50.03 | -144.89 | 1.32 | 2.65 | 2.55 | -999 |
| 8 | 49.99 | -144.99 | 1.30 | 2.67 | 2.61 | -999 |
| 8 | 49.98 | -145.05 | 1.27 | 2.63 | 2.54 | -999 |
| 8 | 50.01 | -144.97 | 1.27 | 2.64 | 2.44 | -999 |
| 8 | 50.01 | -144.91 | 1.28 | 2.56 | 2.41 | -999 |
| 8 | 50.11 | -144.88 | 1.27 | 2.55 | 2.52 | -999 |
| 8 | 50.12 | -144.94 | 1.28 | 2.51 | 2.36 | -999 |
| 8 | 50.04 | -145.09 | 1.25 | 2.60 | 2.26 | -999 |
| 8 | 50.00 | -145.30 | 1.19 | 2.59 | 2.48 | -999 |
| 8 | 50.00 | -145.33 | 1.15 | 2.68 | 2.57 | -999 |
| 8 | 50.00 | -145.51 | 1.13 | 2.50 | 2.70 | -999 |
| 8 | 49.99 | -145.64 | 1.15 | 2.52 | 2.64 | -999 |
| 8 | 50.00 | -145.93 | 1.34 | 2.60 | 2.71 | -999 |
| 8 | 50.00 | -145.93 | 1.39 | 2.78 | 2.80 | -999 |
| 8 | 50.00 | -146.25 | 1.42 | 2.23 | 2.77 | -999 |
| 8 | 50.00 | -146.25 | 1.32 | 2.41 | 2.67 | -999 |
| 8 | 50.00 | -146.57 | 1.29 | 3.09 | 2.65 | -999 |
| 8 | 50.03 | -146.52 | 1.27 | 2.91 | 2.65 | -999 |
| 8 | 50.36 | -146.02 | 1.28 | 2.70 | 2.43 | -999 |
| 8 | 50.52 | -145.76 | 1.40 | 2.76 | 2.53 | -999 |
| 8 | 50.85 | -145.24 | 1.40 | 2.76 | 2.33 | -999 |
| 8 | 51.00 | -145.00 | 1.30 | 2.72 | 2.25 | -999 |
| 8 | 50.81 | -145.00 | 1.32 | 2.66 | 2.26 | -999 |
| 8 | 50.79 | -145.00 | 1.35 | 2.68 | 2.26 | -999 |
| 8 | 50.58 | -145.00 | 1.27 | 2.62 | 2.39 | -999 |
| 8 | 50.44 | -145.00 | 1.24 | 2.71 | 2.46 | -999 |
| 8 | 50.30 | -145.00 | 1.31 | 2.67 | 2.39 | -999 |
| 8 | 50.22 | -145.00 | 1.32 | 2.68 | 2.35 | -999 |
| 8 | 50.10 | -145.00 | 1.30 | 2.53 | 2.28 | -999 |

|   |       |         |      |      |      |      |
|---|-------|---------|------|------|------|------|
| 8 | 50.04 | -144.96 | 1.32 | 2.55 | 2.37 | -999 |
| 8 | 50.03 | -144.88 | 1.28 | 2.56 | 2.31 | -999 |
| 8 | 50.01 | -144.91 | 1.28 | 2.59 | 2.38 | -999 |
| 8 | 50.53 | -148.92 | 1.63 | 2.70 | 1.13 | -999 |
| 8 | 50.58 | -149.15 | 1.59 | 2.64 | 0.75 | -999 |
| 8 | 50.68 | -149.65 | 1.52 | 2.57 | 0.69 | -999 |
| 8 | 50.74 | -149.94 | 1.45 | 2.60 | 0.65 | -999 |
| 8 | 50.87 | -150.59 | 1.49 | 2.58 | 0.71 | -999 |
| 8 | 50.94 | -150.92 | 1.59 | 2.45 | 0.64 | -999 |
| 8 | 51.07 | -151.57 | 1.56 | 2.57 | 0.94 | -999 |
| 8 | 51.14 | -151.89 | 1.48 | 2.64 | 0.74 | -999 |
| 8 | 51.27 | -152.55 | 1.39 | 2.57 | 0.41 | -999 |
| 8 | 51.34 | -152.90 | 1.49 | 2.53 | 0.42 | -999 |
| 8 | 51.48 | -153.61 | 1.57 | 2.55 | 0.38 | -999 |
| 8 | 51.55 | -153.94 | 1.58 | 2.48 | 0.42 | -999 |
| 8 | 51.69 | -154.67 | 1.87 | 2.44 | 0.31 | -999 |
| 8 | 51.76 | -155.02 | 1.96 | 2.48 | 0.31 | -999 |
| 8 | 51.90 | -155.73 | 1.59 | 2.26 | 0.34 | -999 |
| 8 | 51.94 | -155.92 | 1.55 | 2.44 | 0.31 | -999 |
| 8 | 52.09 | -156.67 | 1.63 | 2.68 | 0.96 | -999 |
| 8 | 52.10 | -156.64 | 1.71 | 2.85 | 1.14 | -999 |
| 8 | 54.28 | -154.82 | 1.47 | 2.69 | 1.12 | -999 |
| 8 | 54.47 | -154.67 | 1.58 | 2.76 | 1.19 | -999 |
| 8 | 54.84 | -154.36 | 1.54 | 2.69 | 1.03 | -999 |
| 8 | 55.02 | -154.20 | -999 | -999 | -999 | -999 |
| 8 | 55.38 | -153.89 | 1.57 | 2.56 | 0.74 | -999 |
| 8 | 55.56 | -153.74 | 1.56 | 2.64 | 0.71 | -999 |
| 8 | 55.90 | -153.43 | 1.61 | 2.88 | 0.76 | -999 |
| 8 | 56.07 | -153.28 | 1.65 | 3.01 | 0.79 | -999 |
| 8 | 56.42 | -152.97 | 2.68 | 4.29 | 0.91 | -999 |
| 8 | 56.58 | -152.83 | 2.30 | 3.55 | 0.80 | -999 |
| 8 | 56.92 | -152.53 | 2.44 | 3.45 | 0.89 | -999 |
| 8 | 57.08 | -152.38 | 3.05 | 4.58 | 1.57 | -999 |
| 8 | 57.43 | -152.07 | -999 | -999 | -999 | -999 |
| 8 | 57.59 | -152.02 | -999 | -999 | -999 | -999 |
| 8 | 57.65 | -151.93 | 5.36 | 5.67 | 1.54 | -999 |
| 8 | 57.36 | -151.31 | 3.67 | 4.34 | 1.05 | -999 |
| 8 | 57.21 | -151.00 | 3.16 | 4.22 | 1.06 | -999 |
| 8 | 56.89 | -150.33 | 1.95 | 2.80 | 0.55 | -999 |
| 8 | 56.74 | -150.02 | 4.35 | 2.81 | 0.48 | -999 |
| 8 | 56.43 | -149.39 | 1.76 | 2.71 | 0.48 | -999 |
| 8 | 56.29 | -149.09 | 1.62 | 2.60 | 0.51 | -999 |
| 8 | 56.00 | -148.50 | 1.54 | 2.59 | 0.57 | -999 |
| 8 | 55.85 | -148.20 | 1.67 | 2.72 | 0.95 | -999 |
| 8 | 55.57 | -147.63 | 1.41 | 2.74 | 1.84 | -999 |
| 8 | 55.42 | -147.34 | 1.45 | 2.70 | 1.67 | -999 |
| 8 | 55.14 | -146.77 | 2.38 | 2.77 | 1.67 | -999 |

|   |       |         |      |      |      |      |
|---|-------|---------|------|------|------|------|
| 8 | 55.02 | -146.51 | 1.57 | 2.87 | 1.36 | -999 |
| 8 | 54.92 | -146.48 | 1.56 | 2.80 | 1.46 | -999 |
| 8 | 54.71 | -146.41 | 1.45 | 2.73 | 1.20 | -999 |
| 8 | 54.30 | -146.29 | 1.46 | 2.90 | 1.52 | -999 |
| 8 | 54.09 | -146.23 | 1.41 | 2.85 | 1.48 | -999 |
| 8 | 53.68 | -146.11 | 1.38 | 2.78 | 1.54 | -999 |
| 8 | 53.46 | -146.05 | 1.51 | 2.88 | 1.70 | -999 |
| 8 | 53.05 | -145.93 | 1.84 | 2.81 | 1.86 | -999 |
| 8 | 52.85 | -145.87 | 1.62 | 2.79 | 1.81 | -999 |
| 8 | 52.46 | -145.76 | 1.35 | 2.84 | 1.48 | -999 |
| 8 | 52.28 | -145.70 | 1.48 | 2.82 | 1.47 | -999 |
| 8 | 51.90 | -145.58 | 1.44 | 2.82 | 1.70 | -999 |
| 8 | 51.71 | -145.51 | 1.45 | 2.68 | 1.59 | -999 |
| 8 | 51.33 | -145.38 | 1.44 | 2.74 | 2.04 | -999 |
| 8 | 51.13 | -145.33 | 1.41 | 2.77 | 2.10 | -999 |
| 8 | 50.75 | -145.22 | -999 | 2.74 | 1.98 | -999 |
| 8 | 50.55 | -145.16 | 1.44 | 2.65 | 2.01 | -999 |
| 8 | 50.14 | -145.04 | 1.26 | 2.60 | 1.97 | -999 |
| 8 | 50.00 | -145.00 | 1.25 | 2.67 | 1.93 | -999 |
| 8 | 49.90 | -145.00 | 1.21 | 2.62 | 2.02 | -999 |
| 8 | 49.80 | -145.00 | 1.18 | 2.61 | 2.06 | -999 |
| 8 | 49.70 | -145.00 | 1.21 | 2.48 | 2.11 | -999 |
| 8 | 49.60 | -145.00 | 1.23 | 2.47 | 2.16 | -999 |
| 8 | 49.94 | -144.87 | 1.38 | 2.53 | 1.86 | -999 |
| 8 | 50.00 | -144.84 | 1.35 | 2.62 | 1.89 | -999 |
| 8 | 50.00 | -144.53 | 1.28 | 2.53 | 1.84 | -999 |
| 8 | 50.00 | -144.43 | 1.21 | 2.49 | 1.96 | -999 |
| 8 | 50.00 | -144.06 | 1.12 | 2.47 | 2.09 | -999 |
| 8 | 50.00 | -143.89 | 1.08 | 2.46 | 2.05 | -999 |
| 8 | 50.00 | -143.43 | 1.14 | 2.47 | 1.91 | -999 |
| 8 | 50.00 | -143.44 | 1.21 | 2.50 | 1.85 | -999 |
| 8 | 50.21 | -143.09 | 1.23 | 2.45 | 2.09 | -999 |
| 8 | 50.37 | -142.81 | 1.28 | 2.45 | 2.01 | -999 |
| 8 | 50.70 | -142.25 | 1.21 | 2.46 | 1.89 | -999 |
| 8 | 50.87 | -141.97 | 1.17 | 2.46 | 1.81 | -999 |
| 8 | 51.19 | -141.40 | 1.22 | 2.61 | 1.90 | -999 |
| 8 | 51.36 | -141.12 | 1.23 | 2.65 | 1.75 | -999 |
| 8 | 51.67 | -140.57 | 1.22 | 2.60 | 1.85 | -999 |
| 8 | 51.83 | -140.30 | 1.23 | 2.45 | 1.95 | -999 |
| 8 | 51.95 | -140.09 | 1.22 | 2.49 | 1.92 | -999 |
| 8 | 51.85 | -139.82 | 1.21 | 2.45 | 1.74 | -999 |
| 8 | 51.63 | -139.19 | 1.14 | 2.46 | 1.85 | -999 |
| 8 | 51.53 | -138.88 | 1.14 | 2.54 | 1.90 | -999 |
| 8 | 51.32 | -138.27 | 1.12 | 2.54 | 1.87 | -999 |
| 8 | 51.20 | -137.98 | 1.11 | 2.49 | 1.96 | -999 |
| 8 | 50.61 | -136.51 | 1.09 | 2.39 | 2.30 | -999 |
| 8 | 50.49 | -136.20 | 1.04 | 2.41 | 2.73 | -999 |

|       |       |         |      |      |      |      |
|-------|-------|---------|------|------|------|------|
| 8     | 50.24 | -135.59 | 1.10 | 2.35 | 2.18 | -999 |
| 8     | 50.12 | -135.29 | 1.14 | 2.43 | 2.00 | -999 |
| 8     | 50.04 | -134.99 | 1.13 | 2.33 | 1.91 | -999 |
| 8     | 50.02 | -134.97 | 1.14 | 2.51 | 2.06 | -999 |
| 8     | 49.96 | -134.75 | 1.12 | 2.45 | 1.96 | -999 |
| 8     | 49.87 | -134.42 | 1.17 | 2.39 | 2.18 | -999 |
| 8     | 49.68 | -133.77 | 1.28 | 2.46 | 2.24 | -999 |
| 8     | 49.59 | -133.43 | 1.36 | 2.42 | 2.39 | -999 |
| 8     | 49.41 | -132.77 | 1.40 | 2.45 | 2.18 | -999 |
| 8     | 49.33 | -132.45 | 1.41 | 2.50 | 2.33 | -999 |
| 8     | 49.16 | -131.81 | 1.10 | 2.39 | 2.21 | -999 |
| 8     | 49.07 | -131.49 | 1.08 | 2.35 | 2.97 | -999 |
| 8     | 48.94 | -130.81 | 1.13 | 2.34 | 3.90 | -999 |
| 8     | 48.87 | -130.46 | 1.18 | 2.39 | 3.45 | -999 |
| 8     | 48.77 | -129.80 | 2.00 | 3.01 | 1.93 | -999 |
| 8     | 48.69 | -129.46 | 1.22 | 2.13 | 3.24 | -999 |
| 8     | 48.58 | -129.37 | 1.28 | 2.09 | 2.70 | -999 |
| 8     | 48.68 | -129.68 | 1.18 | 2.11 | 3.24 | -999 |
| 8     | 48.68 | -130.14 | 1.39 | 2.38 | 2.82 | -999 |
| 8     | 48.51 | -130.00 | 1.19 | 2.04 | 3.25 | -999 |
| 8     | 48.29 | -129.39 | 1.44 | 2.53 | 2.49 | -999 |
| 8     | 48.36 | -129.16 | 1.24 | 2.14 | 3.05 | -999 |
| 8     | 48.61 | -128.71 | 2.54 | 3.77 | 2.14 | -999 |
| 8     | 48.59 | -128.36 | 2.26 | 3.45 | 1.96 | -999 |
| 8     | 48.56 | -127.66 | -999 | -999 | -999 | -999 |
| 8     | 48.54 | -127.32 | 3.46 | 4.38 | 3.14 | -999 |
| 8     | 48.55 | -126.62 | 3.82 | 4.99 | 4.44 | -999 |
| 8     | 48.55 | -126.27 | 4.24 | 5.68 | 3.86 | -999 |
| 8     | 48.52 | -125.57 | -999 | -999 | -999 | -999 |
| 8     | 48.50 | -125.24 | -999 | -999 | -999 | -999 |
| <hr/> |       |         |      |      |      |      |
| 9     | 12.29 | 147.09  | 0.68 | 0.64 | 1.23 | -999 |
| 9     | 12.24 | 147.26  | 0.70 | 0.64 | 1.01 | -999 |
| 9     | 12.12 | 147.60  | 0.69 | 0.68 | 0.95 | -999 |
| 9     | 12.06 | 147.76  | 0.67 | 0.69 | 0.97 | -999 |
| 9     | 11.95 | 148.08  | 0.63 | 0.73 | 1.42 | -999 |
| 9     | 11.90 | 148.24  | 0.65 | 0.72 | 1.22 | -999 |
| 9     | 11.78 | 148.56  | 0.66 | 0.63 | -999 | -999 |
| 9     | 11.38 | 149.71  | 0.56 | 0.73 | 1.39 | -999 |
| 9     | 11.32 | 149.88  | 0.60 | 0.72 | 1.43 | -999 |
| 9     | 11.21 | 150.19  | 0.67 | 0.83 | 1.38 | -999 |
| 9     | 11.22 | 150.19  | 0.59 | 0.82 | 1.32 | -999 |
| 9     | 11.11 | 150.48  | 0.60 | 0.82 | 1.42 | -999 |
| 9     | 10.99 | 150.84  | 0.67 | 0.76 | -999 | -999 |
| 9     | 10.88 | 151.15  | 0.68 | 0.72 | 1.27 | -999 |
| 9     | 10.82 | 151.31  | 0.62 | 0.82 | 1.25 | -999 |
| 9     | 10.72 | 151.61  | 0.63 | 1.06 | 1.61 | -999 |
| 9     | 10.67 | 151.76  | 0.60 | 1.20 | 1.99 | -999 |

|   |       |        |      |      |      |      |
|---|-------|--------|------|------|------|------|
| 9 | 10.56 | 152.06 | 0.57 | 0.91 | 1.78 | -999 |
| 9 | 10.51 | 152.20 | 0.64 | 0.85 | 1.61 | -999 |
| 9 | 10.40 | 152.53 | 0.50 | 0.74 | 1.73 | -999 |
| 9 | 10.34 | 152.68 | 0.58 | 0.92 | 2.07 | -999 |
| 9 | 10.24 | 152.98 | 0.52 | 1.04 | 2.24 | -999 |
| 9 | 10.18 | 153.14 | 0.61 | 0.78 | 2.00 | -999 |
| 9 | 10.07 | 153.45 | 0.59 | 0.85 | 2.35 | -999 |
| 9 | 10.02 | 153.60 | 0.61 | 0.80 | 2.24 | -999 |
| 9 | 9.91  | 153.93 | 0.61 | 1.04 | 2.23 | -999 |
| 9 | 9.88  | 154.01 | 0.59 | 1.18 | 1.95 | -999 |
| 9 | 9.80  | 154.22 | 0.62 | 1.05 | 1.83 | -999 |
| 9 | 9.75  | 154.37 | 0.62 | 1.07 | 1.79 | -999 |
| 9 | 9.62  | 154.74 | 0.67 | 0.96 | 1.61 | -999 |
| 9 | 9.57  | 154.87 | 0.70 | 0.82 | 1.82 | -999 |
| 9 | 9.50  | 155.07 | 0.70 | 0.80 | 1.67 | -999 |
| 9 | 9.47  | 155.18 | 0.68 | 0.77 | 1.56 | -999 |
| 9 | 9.39  | 155.38 | 0.61 | 0.85 | 1.87 | -999 |
| 9 | 9.36  | 155.48 | 0.58 | 0.86 | 1.80 | -999 |
| 9 | 9.29  | 155.69 | 0.56 | 0.91 | 1.89 | -999 |
| 9 | 9.23  | 155.86 | 0.57 | 0.98 | 2.13 | -999 |
| 9 | 9.18  | 156.00 | 0.50 | 0.96 | 1.72 | -999 |
| 9 | 9.16  | 156.06 | 0.56 | 0.75 | 1.71 | -999 |
| 9 | 9.11  | 156.19 | 0.51 | 1.01 | 1.69 | -999 |
| 9 | 9.08  | 156.26 | 0.54 | 1.08 | 1.84 | -999 |
| 9 | 9.04  | 156.38 | 0.65 | 1.00 | 2.03 | -999 |
| 9 | 9.04  | 156.39 | 0.55 | 1.03 | 2.02 | -999 |
| 9 | 8.99  | 156.54 | 0.56 | 0.96 | 1.99 | -999 |
| 9 | 8.95  | 156.64 | 0.58 | 0.89 | 1.93 | -999 |
| 9 | 8.83  | 156.98 | 0.66 | 0.98 | 1.82 | -999 |
| 9 | 8.78  | 157.14 | 0.59 | 0.82 | 1.79 | -999 |
| 9 | 8.66  | 157.47 | 0.62 | 1.00 | 1.87 | -999 |
| 9 | 8.61  | 157.62 | 0.60 | 0.83 | 1.85 | -999 |
| 9 | 8.49  | 157.94 | 0.62 | 0.87 | 1.82 | -999 |
| 9 | 8.44  | 158.10 | 0.58 | 0.83 | 1.41 | -999 |
| 9 | 8.33  | 158.41 | 0.56 | 0.89 | 1.69 | -999 |
| 9 | 8.28  | 158.56 | -999 | -999 | -999 | -999 |
| 9 | 8.17  | 158.85 | 0.56 | 0.90 | 1.81 | -999 |
| 9 | 8.12  | 159.01 | 0.55 | 0.92 | 1.76 | -999 |
| 9 | 8.01  | 159.32 | 0.56 | 0.89 | 1.54 | -999 |
| 9 | 7.96  | 159.47 | 0.59 | 0.92 | 1.56 | -999 |
| 9 | 7.85  | 159.78 | 0.63 | 0.96 | 1.74 | -999 |
| 9 | 7.79  | 159.93 | 0.56 | 0.81 | 1.84 | -999 |
| 9 | 7.75  | 160.06 | 0.56 | 0.82 | 1.86 | -999 |
| 9 | 7.69  | 160.21 | 0.56 | 0.77 | 1.87 | -999 |
| 9 | 7.60  | 160.48 | 0.57 | 0.84 | 1.73 | -999 |
| 9 | 7.56  | 160.60 | 0.55 | 0.74 | 1.55 | -999 |
| 9 | 7.46  | 160.86 | 0.60 | 0.77 | 1.51 | -999 |

|   |      |        |      |      |      |      |
|---|------|--------|------|------|------|------|
| 9 | 7.42 | 160.98 | 0.60 | 0.80 | 1.71 | -999 |
| 9 | 7.34 | 161.21 | 0.63 | 0.72 | 1.54 | -999 |
| 9 | 7.30 | 161.33 | 0.60 | 0.83 | 1.68 | -999 |
| 9 | 7.21 | 161.58 | 0.63 | 0.87 | 1.85 | -999 |
| 9 | 7.17 | 161.70 | 0.63 | 0.84 | 1.87 | -999 |
| 9 | 7.08 | 161.95 | 0.60 | 0.89 | 1.57 | -999 |
| 9 | 7.04 | 162.08 | 0.61 | 0.92 | 1.84 | -999 |
| 9 | 6.95 | 162.33 | 0.53 | 1.08 | 1.86 | -999 |
| 9 | 6.90 | 162.46 | 0.54 | 1.18 | 1.64 | -999 |
| 9 | 6.81 | 162.71 | 0.53 | 1.15 | 1.56 | -999 |
| 9 | 6.77 | 162.83 | 0.53 | 0.98 | 1.63 | -999 |
| 9 | 6.68 | 163.09 | 0.57 | 0.92 | 1.66 | -999 |
| 9 | 6.66 | 163.13 | 0.55 | 1.01 | 1.68 | -999 |
| 9 | 6.60 | 163.31 | 0.55 | 0.94 | 1.66 | -999 |
| 9 | 6.56 | 163.42 | 0.57 | 0.97 | 1.62 | -999 |
| 9 | 6.46 | 163.71 | 0.66 | 1.12 | 2.05 | -999 |
| 9 | 6.42 | 163.83 | 0.64 | 0.92 | 2.18 | -999 |
| 9 | 6.34 | 164.06 | 0.59 | 1.03 | 2.13 | -999 |
| 9 | 6.29 | 164.18 | 0.60 | 1.04 | 1.87 | -999 |
| 9 | 6.21 | 164.41 | 0.59 | 0.94 | 1.88 | -999 |
| 9 | 6.17 | 164.53 | 0.51 | 1.10 | 2.26 | -999 |
| 9 | 6.09 | 164.76 | 0.58 | 1.08 | 2.17 | -999 |
| 9 | 6.04 | 164.88 | 0.61 | 1.00 | 2.03 | -999 |
| 9 | 5.95 | 165.11 | 0.57 | 1.25 | 2.20 | -999 |
| 9 | 5.91 | 165.23 | 0.58 | 1.17 | 1.99 | -999 |
| 9 | 5.82 | 165.46 | 0.60 | 1.09 | 2.11 | -999 |
| 9 | 5.77 | 165.58 | 0.54 | 1.11 | 2.32 | -999 |
| 9 | 5.67 | 165.82 | 0.62 | 1.03 | 2.16 | -999 |
| 9 | 5.63 | 165.94 | 0.61 | 1.19 | 2.29 | -999 |
| 9 | 5.25 | 166.89 | 0.66 | 1.09 | 2.22 | -999 |
| 9 | 5.20 | 167.01 | 0.57 | 1.13 | 2.21 | -999 |
| 9 | 5.11 | 167.23 | 0.61 | 1.21 | 2.01 | -999 |
| 9 | 5.06 | 167.35 | 0.59 | 1.16 | 2.08 | -999 |
| 9 | 4.97 | 167.58 | 0.61 | 1.38 | 1.85 | -999 |
| 9 | 4.92 | 167.71 | 0.65 | 1.15 | 1.99 | -999 |
| 9 | 4.41 | 168.99 | 0.68 | 1.47 | 3.21 | -999 |
| 9 | 4.36 | 169.10 | 0.65 | 1.43 | 2.48 | -999 |
| 9 | 4.27 | 169.34 | 0.65 | 1.09 | 1.82 | -999 |
| 9 | 4.22 | 169.45 | 0.65 | 0.95 | 1.80 | -999 |
| 9 | 4.10 | 169.76 | 0.66 | 1.05 | 1.81 | -999 |
| 9 | 4.05 | 169.88 | 0.69 | 1.09 | 1.93 | -999 |
| 9 | 3.96 | 170.10 | 0.60 | 1.58 | 2.24 | -999 |
| 9 | 3.92 | 170.22 | 0.65 | 1.70 | 2.24 | -999 |
| 9 | 3.82 | 170.46 | 0.73 | 1.36 | 2.18 | -999 |
| 9 | 3.77 | 170.57 | 0.69 | 1.34 | 2.20 | -999 |
| 9 | 3.68 | 170.81 | 0.66 | 1.35 | 2.52 | -999 |
| 9 | 3.63 | 170.93 | 0.59 | 1.19 | 2.39 | -999 |



|   |      |        |      |      |      |      |
|---|------|--------|------|------|------|------|
| 9 | 3.54 | 171.17 | 0.72 | 1.50 | 2.46 | -999 |
| 9 | 3.49 | 171.28 | 0.72 | 1.43 | 2.31 | -999 |
| 9 | 3.40 | 171.51 | 0.73 | 1.52 | 2.05 | -999 |
| 9 | 3.35 | 171.63 | 0.64 | 1.43 | 2.38 | -999 |
| 9 | 3.30 | 171.76 | 0.68 | 1.52 | 2.28 | -999 |
| 9 | 3.27 | 171.84 | 0.73 | 1.58 | 2.23 | -999 |
| 9 | 3.17 | 172.07 | 0.73 | 1.49 | 2.14 | -999 |
| 9 | 3.13 | 172.19 | 0.74 | 1.24 | 1.83 | -999 |
| 9 | 3.02 | 172.46 | 0.84 | 1.68 | 2.24 | -999 |
| 9 | 2.97 | 172.57 | 0.92 | 1.82 | 1.84 | -999 |
| 9 | 2.88 | 172.80 | 1.01 | 1.88 | 1.71 | -999 |
| 9 | 2.84 | 172.91 | 1.01 | 1.62 | 1.51 | -999 |
| 9 | 2.75 | 173.13 | 1.15 | 2.03 | 1.47 | -999 |
| 9 | 2.70 | 173.24 | 0.98 | 1.78 | 1.55 | -999 |
| 9 | 2.61 | 173.48 | 0.98 | 1.89 | 1.68 | -999 |
| 9 | 2.57 | 173.59 | 0.99 | 1.90 | 1.72 | -999 |
| 9 | 2.47 | 173.82 | 1.12 | 2.14 | 1.61 | -999 |
| 9 | 2.42 | 173.94 | 1.08 | 2.23 | 1.46 | -999 |
| 9 | 2.33 | 174.18 | 1.11 | 2.55 | 1.41 | -999 |
| 9 | 2.28 | 174.29 | 1.07 | 2.41 | 1.43 | -999 |
| 9 | 2.19 | 174.54 | 1.02 | 2.11 | 1.40 | -999 |
| 9 | 2.16 | 174.61 | 0.97 | 2.03 | 1.56 | -999 |
| 9 | 2.10 | 174.75 | 1.01 | 1.90 | 1.61 | -999 |
| 9 | 2.06 | 174.86 | 1.06 | 2.06 | 1.51 | -999 |
| 9 | 1.97 | 175.10 | 1.00 | 2.20 | 1.55 | -999 |
| 9 | 1.92 | 175.22 | 1.02 | 2.20 | 1.54 | -999 |
| 9 | 1.82 | 175.47 | 1.04 | 2.37 | 1.53 | -999 |
| 9 | 1.77 | 175.58 | 1.03 | 2.44 | 1.38 | -999 |
| 9 | 1.68 | 175.81 | 0.93 | 2.44 | 1.30 | -999 |
| 9 | 1.63 | 175.93 | 0.97 | 2.40 | 1.40 | -999 |
| 9 | 1.54 | 176.16 | 0.96 | 2.66 | 1.40 | -999 |
| 9 | 1.49 | 176.28 | 0.98 | 2.77 | 1.47 | -999 |
| 9 | 1.39 | 176.52 | 0.92 | 2.81 | 1.42 | -999 |
| 9 | 1.35 | 176.63 | 0.85 | 2.76 | 1.49 | -999 |
| 9 | 1.25 | 176.87 | 0.93 | 2.67 | 1.59 | -999 |
| 9 | 1.20 | 176.99 | 0.92 | 2.76 | 1.74 | -999 |
| 9 | 1.10 | 177.24 | 0.86 | 3.21 | 1.73 | -999 |
| 9 | 1.05 | 177.37 | 0.93 | 3.07 | 1.69 | -999 |
| 9 | 0.97 | 177.57 | 0.91 | 3.10 | 1.77 | -999 |
| 9 | 0.96 | 177.58 | 0.87 | 2.89 | 1.66 | -999 |
| 9 | 0.87 | 177.81 | -999 | -999 | -999 | -999 |
| 9 | 0.82 | 177.93 | -999 | -999 | -999 | -999 |
| 9 | 0.73 | 178.15 | 0.95 | 2.15 | 0.91 | -999 |
| 9 | 0.68 | 178.28 | 0.93 | 2.03 | 0.95 | -999 |
| 9 | 0.59 | 178.51 | 0.94 | 2.32 | 1.21 | -999 |
| 9 | 0.55 | 178.62 | 0.89 | 2.49 | 1.47 | -999 |
| 9 | 0.46 | 178.85 | 0.84 | 2.99 | 1.67 | -999 |

|   |      |         |      |      |      |      |
|---|------|---------|------|------|------|------|
| 9 | 0.41 | 178.96  | 0.82 | 2.84 | 1.55 | -999 |
| 9 | 0.33 | 179.18  | 0.90 | 2.94 | 1.36 | -999 |
| 9 | 0.28 | 179.30  | 0.93 | 2.70 | 1.52 | -999 |
| 9 | 0.19 | 179.53  | 0.89 | 3.19 | 1.47 | -999 |
| 9 | 0.14 | 179.65  | 0.91 | 3.11 | 1.40 | -999 |
| 9 | 0.04 | 179.90  | 0.84 | 3.35 | 1.35 | -999 |
| 9 | 0.00 | -179.99 | 0.85 | 3.42 | 1.37 | -999 |
| 9 | 0.00 | -179.73 | 0.84 | 3.39 | 1.50 | -999 |
| 9 | 0.00 | -179.60 | 0.82 | 3.57 | 1.46 | -999 |
| 9 | 0.00 | -179.36 | 0.79 | 2.91 | 1.48 | -999 |
| 9 | 0.00 | -179.23 | 0.85 | 2.79 | 1.56 | -999 |
| 9 | 0.00 | -178.98 | 0.81 | 2.95 | 1.87 | -999 |
| 9 | 0.00 | -178.84 | 0.89 | 2.72 | 1.97 | -999 |
| 9 | 0.01 | -178.59 | 0.98 | 2.74 | 1.77 | -999 |
| 9 | 0.10 | -178.50 | 0.99 | 2.65 | 1.52 | -999 |
| 9 | 0.28 | -178.33 | 0.86 | 2.72 | 1.22 | -999 |
| 9 | 0.36 | -178.24 | 0.86 | 2.79 | 1.16 | -999 |
| 9 | 0.55 | -178.06 | 0.77 | 2.85 | 1.46 | -999 |
| 9 | 0.65 | -177.97 | 0.76 | 2.80 | 1.14 | -999 |
| 9 | 0.83 | -177.78 | 0.69 | 3.12 | 1.11 | -999 |
| 9 | 0.92 | -177.69 | 0.73 | 2.80 | 1.28 | -999 |
| 9 | 1.11 | -177.51 | 0.73 | 3.24 | 1.22 | -999 |
| 9 | 1.20 | -177.42 | 0.70 | 3.06 | 1.20 | -999 |
| 9 | 1.38 | -177.24 | 0.77 | 2.84 | 1.33 | -999 |
| 9 | 1.48 | -177.15 | 0.76 | 2.86 | 1.39 | -999 |
| 9 | 1.59 | -177.03 | 0.67 | 2.56 | 1.22 | -999 |
| 9 | 1.65 | -176.98 | 0.65 | 2.43 | 1.20 | -999 |
| 9 | 1.83 | -176.79 | 0.66 | 2.14 | 1.30 | -999 |
| 9 | 1.92 | -176.70 | 0.67 | 2.27 | 1.45 | -999 |
| 9 | 2.12 | -176.51 | 0.67 | 2.85 | 1.39 | -999 |
| 9 | 2.21 | -176.41 | 0.67 | 2.86 | 1.26 | -999 |
| 9 | 2.39 | -176.23 | 0.77 | 2.88 | 1.24 | -999 |
| 9 | 2.47 | -176.14 | 0.84 | 2.76 | 1.23 | -999 |
| 9 | 2.65 | -175.96 | 0.86 | 2.56 | 1.02 | -999 |
| 9 | 2.74 | -175.87 | 0.78 | 2.35 | 1.06 | -999 |
| 9 | 2.92 | -175.68 | 0.88 | 2.29 | 0.88 | -999 |
| 9 | 3.00 | -175.59 | 0.85 | 2.76 | 1.01 | -999 |
| 9 | 3.17 | -175.41 | 0.74 | 3.08 | 1.24 | -999 |
| 9 | 3.26 | -175.32 | 0.81 | 2.71 | 1.43 | -999 |
| 9 | 3.43 | -175.14 | 0.93 | 2.63 | 1.19 | -999 |
| 9 | 3.51 | -175.05 | 0.98 | 2.37 | 1.25 | -999 |
| 9 | 3.70 | -174.87 | 1.01 | 2.50 | 1.29 | -999 |
| 9 | 3.78 | -174.79 | 0.94 | 2.74 | 1.37 | -999 |
| 9 | 3.86 | -174.71 | 0.99 | 2.43 | 1.21 | -999 |
| 9 | 3.95 | -174.62 | 0.99 | 2.06 | 1.17 | -999 |
| 9 | 4.12 | -174.45 | 0.90 | 2.45 | 1.26 | -999 |
| 9 | 4.21 | -174.35 | 0.88 | 2.25 | 1.16 | -999 |

|   |      |         |      |      |      |      |
|---|------|---------|------|------|------|------|
| 9 | 4.41 | -174.13 | 0.80 | 2.38 | 1.08 | -999 |
| 9 | 4.51 | -174.03 | 0.76 | 2.26 | 1.17 | -999 |
| 9 | 4.71 | -173.83 | 0.79 | 2.46 | 1.10 | -999 |
| 9 | 4.80 | -173.74 | 0.81 | 2.14 | 1.17 | -999 |
| 9 | 5.00 | -173.56 | 0.87 | 2.31 | 1.47 | -999 |
| 9 | 5.10 | -173.46 | 0.87 | 2.06 | 2.59 | -999 |
| 9 | 5.29 | -173.26 | 0.89 | 1.81 | 2.96 | -999 |
| 9 | 5.39 | -173.16 | 0.89 | 1.86 | 3.04 | -999 |
| 9 | 5.59 | -172.96 | 0.83 | 1.42 | 2.86 | -999 |
| 9 | 5.69 | -172.86 | 0.84 | 1.34 | 2.64 | -999 |
| 9 | 5.90 | -172.65 | 0.81 | 1.45 | 2.47 | -999 |
| 9 | 5.91 | -172.65 | 0.77 | 1.48 | 2.58 | -999 |
| 9 | 5.92 | -172.47 | 0.86 | 1.45 | 2.40 | -999 |
| 9 | 5.82 | -172.37 | 0.86 | 1.45 | 2.73 | -999 |
| 9 | 5.63 | -172.18 | 0.87 | 1.55 | 2.73 | -999 |
| 9 | 5.52 | -172.05 | 0.84 | 1.62 | 2.67 | -999 |
| 9 | 5.33 | -171.86 | 0.84 | 1.79 | 1.54 | -999 |
| 9 | 5.23 | -171.77 | 0.87 | 1.85 | 0.98 | -999 |
| 9 | 5.03 | -171.58 | 0.90 | 2.36 | 0.69 | -999 |
| 9 | 4.93 | -171.47 | 0.90 | 2.44 | 0.91 | -999 |
| 9 | 4.74 | -171.28 | 0.80 | 2.22 | 1.13 | -999 |
| 9 | 4.64 | -171.18 | 0.76 | 2.42 | 1.39 | -999 |
| 9 | 4.45 | -170.99 | 0.85 | 2.55 | 1.47 | -999 |
| 9 | 4.36 | -170.90 | 0.94 | 2.52 | 1.40 | -999 |
| 9 | 4.16 | -170.70 | 0.91 | 2.38 | 1.47 | -999 |
| 9 | 4.06 | -170.60 | 0.95 | 2.27 | 1.43 | -999 |
| 9 | 3.89 | -170.43 | 0.90 | 2.22 | 1.83 | -999 |
| 9 | 3.87 | -170.41 | 0.92 | 2.16 | 1.72 | -999 |
| 9 | 3.67 | -170.21 | 0.89 | 2.17 | 1.72 | -999 |
| 9 | 3.58 | -170.12 | 0.93 | 2.12 | 1.57 | -999 |
| 9 | 3.38 | -169.92 | 0.88 | 2.11 | 1.36 | -999 |
| 9 | 3.28 | -169.82 | 0.97 | 2.11 | 1.49 | -999 |
| 9 | 3.09 | -169.62 | 1.01 | 2.05 | 1.18 | -999 |
| 9 | 2.99 | -169.53 | 0.91 | 2.14 | 1.24 | -999 |
| 9 | 2.80 | -169.33 | 0.93 | 2.27 | 1.60 | -999 |
| 9 | 2.70 | -169.23 | 0.87 | 2.15 | 1.84 | -999 |
| 9 | 2.50 | -169.04 | 0.86 | 2.23 | 1.84 | -999 |
| 9 | 2.40 | -168.94 | 0.87 | 2.46 | 2.12 | -999 |
| 9 | 2.20 | -168.74 | 0.82 | 3.19 | 1.76 | -999 |
| 9 | 2.11 | -168.65 | 0.82 | 3.11 | 1.70 | -999 |
| 9 | 1.92 | -168.46 | 0.83 | 3.08 | 1.49 | -999 |
| 9 | 1.83 | -168.36 | 0.75 | 3.16 | 1.57 | -999 |
| 9 | 1.63 | -168.17 | 0.71 | 3.22 | 1.50 | -999 |
| 9 | 1.53 | -168.07 | 0.64 | 3.13 | 1.41 | -999 |
| 9 | 1.33 | -167.87 | 0.66 | 3.25 | 1.46 | -999 |
| 9 | 1.24 | -167.77 | 0.73 | 3.55 | 1.40 | -999 |
| 9 | 1.04 | -167.58 | 0.86 | 3.58 | 1.72 | -999 |

|   |      |         |      |      |      |      |
|---|------|---------|------|------|------|------|
| 9 | 0.87 | -167.40 | 0.79 | 2.55 | 1.69 | -999 |
| 9 | 0.77 | -167.31 | 0.79 | 2.77 | 1.67 | -999 |
| 9 | 0.57 | -167.11 | 0.72 | 3.26 | 1.34 | -999 |
| 9 | 0.47 | -167.01 | 0.71 | 3.44 | 1.26 | -999 |
| 9 | 0.28 | -166.81 | 0.71 | 3.52 | 1.78 | -999 |
| 9 | 0.18 | -166.71 | 0.73 | 3.59 | 1.81 | -999 |
| 9 | 0.03 | -166.56 | 0.77 | 3.31 | 1.71 | -999 |
| 9 | 0.00 | -166.53 | 0.75 | 3.22 | 1.62 | -999 |
| 9 | 0.19 | -166.34 | 0.73 | 3.11 | 1.64 | -999 |
| 9 | 0.29 | -166.24 | 0.71 | 3.29 | 1.59 | -999 |
| 9 | 0.49 | -166.04 | 0.66 | 3.69 | 1.54 | -999 |
| 9 | 0.59 | -165.94 | 0.66 | 3.66 | 1.88 | -999 |
| 9 | 0.78 | -165.75 | 0.78 | 3.03 | 2.49 | -999 |
| 9 | 0.88 | -165.65 | 0.70 | 2.82 | 2.19 | -999 |
| 9 | 1.09 | -165.44 | 0.79 | 2.71 | 2.22 | -999 |
| 9 | 1.18 | -165.35 | 0.76 | 2.84 | 1.90 | -999 |
| 9 | 1.37 | -165.16 | 0.82 | 2.47 | 1.69 | -999 |
| 9 | 1.46 | -165.07 | 0.83 | 2.26 | 1.66 | -999 |
| 9 | 1.65 | -164.88 | 0.86 | 2.13 | 1.83 | -999 |
| 9 | 1.74 | -164.78 | 0.94 | 2.30 | 1.62 | -999 |
| 9 | 1.93 | -164.60 | 0.97 | 2.23 | 1.39 | -999 |
| 9 | 2.03 | -164.50 | 0.95 | 2.22 | 1.35 | -999 |
| 9 | 2.22 | -164.31 | 0.90 | 2.00 | 1.43 | -999 |
| 9 | 2.31 | -164.21 | 0.89 | 1.92 | 1.53 | -999 |
| 9 | 2.51 | -164.02 | 0.95 | 2.09 | 1.64 | -999 |
| 9 | 2.60 | -163.92 | 0.95 | 2.23 | 1.60 | -999 |
| 9 | 2.70 | -163.82 | 0.99 | 2.07 | 1.55 | -999 |
| 9 | 2.80 | -163.73 | 1.02 | 1.98 | 1.54 | -999 |
| 9 | 2.99 | -163.53 | 0.94 | 1.80 | 1.40 | -999 |
| 9 | 3.09 | -163.43 | 1.00 | 1.82 | 1.28 | -999 |
| 9 | 3.30 | -163.22 | 1.02 | 1.99 | 1.44 | -999 |
| 9 | 3.40 | -163.12 | 0.97 | 2.17 | 1.46 | -999 |
| 9 | 3.60 | -162.92 | 1.00 | 2.31 | 1.49 | -999 |
| 9 | 3.69 | -162.82 | 0.95 | 2.08 | 1.57 | -999 |
| 9 | 3.88 | -162.63 | 1.00 | 2.27 | 1.43 | -999 |
| 9 | 3.98 | -162.54 | 0.98 | 2.17 | 1.47 | -999 |
| 9 | 4.17 | -162.35 | 0.99 | 2.01 | 1.67 | -999 |
| 9 | 4.26 | -162.25 | 1.02 | 1.98 | 1.59 | -999 |
| 9 | 4.45 | -162.06 | 1.02 | 1.97 | 1.63 | -999 |
| 9 | 4.55 | -161.96 | 0.95 | 1.87 | 1.86 | -999 |
| 9 | 4.74 | -161.77 | 1.03 | 2.08 | 1.83 | -999 |
| 9 | 4.84 | -161.67 | 1.00 | 2.01 | 1.65 | -999 |
| 9 | 4.92 | -161.59 | 1.02 | 2.15 | 1.59 | -999 |
| 9 | 5.02 | -161.49 | 0.92 | 2.05 | 1.62 | -999 |
| 9 | 5.21 | -161.30 | 0.93 | 2.13 | 1.58 | -999 |
| 9 | 5.30 | -161.20 | 0.92 | 1.94 | 1.69 | -999 |
| 9 | 5.53 | -160.97 | 0.94 | 1.85 | 1.57 | -999 |

|   |      |         |      |      |      |      |
|---|------|---------|------|------|------|------|
| 9 | 5.63 | -160.88 | 0.91 | 2.06 | 1.63 | -999 |
| 9 | 5.82 | -160.69 | 0.96 | 1.71 | 1.56 | -999 |
| 9 | 5.91 | -160.59 | 0.97 | 1.52 | 1.50 | -999 |
| 9 | 5.89 | -160.42 | 0.97 | 1.63 | 1.46 | -999 |
| 9 | 5.79 | -160.35 | 1.01 | 1.58 | 1.57 | -999 |
| 9 | 5.57 | -160.19 | 1.02 | 1.70 | 1.43 | -999 |
| 9 | 5.46 | -160.12 | 0.92 | 1.75 | 1.46 | -999 |
| 9 | 5.24 | -159.96 | 0.94 | 1.79 | 1.42 | -999 |
| 9 | 5.13 | -159.88 | 0.96 | 1.86 | 1.44 | -999 |
| 9 | 4.91 | -159.72 | 0.90 | 1.91 | 1.49 | -999 |
| 9 | 4.83 | -159.67 | 0.90 | 2.28 | 1.54 | -999 |
| 9 | 4.68 | -159.57 | 0.89 | 2.17 | 1.46 | -999 |
| 9 | 4.57 | -159.49 | 0.93 | 2.05 | 1.60 | -999 |
| 9 | 4.36 | -159.34 | 0.96 | 2.11 | 1.51 | -999 |
| 9 | 4.27 | -159.24 | 0.90 | 2.09 | 1.59 | -999 |
| 9 | 4.07 | -159.01 | 0.85 | 2.09 | 1.61 | -999 |
| 9 | 3.98 | -158.92 | 0.84 | 2.52 | 1.44 | -999 |
| 9 | 3.83 | -158.70 | 0.85 | 2.39 | 1.71 | -999 |
| 9 | 3.75 | -158.61 | 0.93 | 2.36 | 1.43 | -999 |
| 9 | 3.57 | -158.40 | 0.87 | 2.56 | 1.24 | -999 |
| 9 | 3.48 | -158.30 | 0.86 | 2.47 | 1.20 | -999 |
| 9 | 3.27 | -158.12 | 0.84 | 2.61 | 1.34 | -999 |
| 9 | 3.16 | -158.03 | 0.76 | 2.60 | 1.34 | -999 |
| 9 | 3.06 | -157.88 | 0.85 | 2.79 | 1.42 | -999 |
| 9 | 3.20 | -157.88 | 0.80 | 2.55 | 1.49 | -999 |
| 9 | 3.40 | -157.88 | 0.75 | 2.41 | 1.43 | -999 |
| 9 | 3.48 | -157.88 | 0.80 | 2.27 | 1.49 | -999 |
| 9 | 3.72 | -157.75 | 0.82 | 2.47 | 1.50 | -999 |
| 9 | 3.85 | -157.76 | 0.75 | 2.25 | 1.38 | -999 |
| 9 | 4.10 | -157.86 | 0.85 | 2.24 | 1.09 | -999 |
| 9 | 4.22 | -157.92 | 0.86 | 2.15 | 1.17 | -999 |
| 9 | 4.52 | -158.05 | 0.79 | 1.96 | 1.13 | -999 |
| 9 | 4.65 | -158.11 | 0.89 | 2.05 | 1.11 | -999 |
| 9 | 4.91 | -158.22 | 0.92 | 1.95 | 1.25 | -999 |
| 9 | 5.04 | -158.28 | 0.91 | 1.96 | 1.34 | -999 |
| 9 | 5.29 | -158.39 | 0.90 | 1.94 | 1.38 | -999 |
| 9 | 5.42 | -158.44 | 0.87 | 1.87 | 1.34 | -999 |
| 9 | 5.68 | -158.54 | 0.93 | 1.61 | 2.12 | -999 |
| 9 | 5.81 | -158.58 | 0.97 | 1.41 | 2.12 | -999 |
| 9 | 6.07 | -158.67 | 0.94 | 1.52 | 1.79 | -999 |
| 9 | 6.20 | -158.72 | 0.89 | 1.61 | 1.64 | -999 |
| 9 | 6.36 | -158.78 | 0.89 | 1.79 | 1.36 | -999 |
| 9 | 6.44 | -158.76 | 0.98 | 1.89 | 1.35 | -999 |
| 9 | 6.70 | -158.67 | 0.91 | 1.91 | 1.30 | -999 |
| 9 | 6.84 | -158.66 | 0.94 | 1.63 | 1.27 | -999 |
| 9 | 7.07 | -158.57 | 0.95 | 1.61 | 1.18 | -999 |
| 9 | 7.20 | -158.55 | 0.96 | 1.67 | 1.22 | -999 |

|   |       |         |      |      |      |      |
|---|-------|---------|------|------|------|------|
| 9 | 7.48  | -158.51 | 0.95 | 1.20 | 1.78 | -999 |
| 9 | 7.61  | -158.48 | 0.94 | 1.47 | 1.92 | -999 |
| 9 | 7.85  | -158.38 | 0.97 | 1.57 | 1.50 | -999 |
| 9 | 7.99  | -158.38 | 0.92 | 1.51 | 1.67 | -999 |
| 9 | 8.26  | -158.38 | 1.03 | 1.12 | 2.47 | -999 |
| 9 | 8.39  | -158.38 | 1.00 | 1.10 | 2.51 | -999 |
| 9 | 8.67  | -158.37 | 0.89 | 1.11 | 2.37 | -999 |
| 9 | 8.80  | -158.37 | 0.91 | 0.98 | 2.58 | -999 |
| 9 | 9.07  | -158.36 | 0.96 | 1.21 | 2.83 | -999 |
| 9 | 9.21  | -158.35 | 0.90 | 1.10 | 2.79 | -999 |
| 9 | 9.35  | -158.34 | 0.95 | 1.03 | 2.66 | -999 |
| 9 | 9.44  | -158.26 | 0.96 | 1.07 | 2.49 | -999 |
| 9 | 9.68  | -158.20 | 0.97 | 1.05 | 2.50 | -999 |
| 9 | 9.81  | -158.19 | 0.90 | 0.98 | 2.46 | -999 |
| 9 | 9.98  | -158.03 | 0.92 | 0.95 | 2.12 | -999 |
| 9 | 9.97  | -158.11 | 0.95 | 1.12 | 2.04 | -999 |
| 9 | 10.23 | -158.00 | 0.90 | 0.98 | 2.10 | -999 |
| 9 | 10.36 | -157.95 | 0.85 | 1.15 | 2.02 | -999 |
| 9 | 10.62 | -157.88 | 0.84 | 0.90 | 2.03 | -999 |
| 9 | 10.76 | -157.88 | 0.83 | 0.92 | 1.97 | -999 |
| 9 | 11.03 | -157.88 | 0.76 | 0.80 | 2.24 | -999 |
| 9 | 11.17 | -157.88 | 0.78 | 0.69 | 2.42 | -999 |
| 9 | 11.45 | -157.88 | 0.74 | 0.93 | 2.38 | -999 |
| 9 | 11.59 | -157.88 | 0.78 | 0.93 | 2.58 | -999 |
| 9 | 11.86 | -157.88 | 0.74 | 1.01 | 2.52 | -999 |
| 9 | 11.99 | -157.88 | 0.76 | 0.98 | 2.35 | -999 |
| 9 | 12.13 | -157.88 | 0.78 | 1.07 | 2.29 | -999 |
| 9 | 12.24 | -157.83 | 0.79 | 0.84 | 2.43 | -999 |
| 9 | 13.23 | -157.76 | 0.86 | 0.96 | 2.38 | -999 |
| 9 | 13.36 | -157.77 | 0.80 | 0.95 | 2.02 | -999 |
| 9 | 13.62 | -157.78 | 0.79 | 1.11 | 2.05 | -999 |
| 9 | 13.77 | -157.78 | 0.86 | 0.93 | 2.24 | -999 |
| 9 | 14.04 | -157.80 | 0.85 | 1.04 | 2.22 | -999 |
| 9 | 14.17 | -157.81 | 0.85 | 0.91 | 2.24 | -999 |
| 9 | 14.44 | -157.81 | 0.78 | 1.01 | 2.44 | -999 |
| 9 | 14.58 | -157.82 | 0.81 | 1.01 | 2.39 | -999 |
| 9 | 14.84 | -157.81 | 0.83 | 1.21 | 2.44 | -999 |
| 9 | 14.97 | -157.81 | 0.85 | 1.04 | 2.02 | -999 |
| 9 | 15.10 | -157.81 | 0.82 | 1.09 | 2.12 | -999 |
| 9 | 15.24 | -157.81 | 0.80 | 1.06 | 2.22 | -999 |
| 9 | 15.49 | -157.85 | 0.81 | 1.09 | 2.57 | -999 |
| 9 | 15.62 | -157.87 | 0.82 | 0.94 | 2.59 | -999 |
| 9 | 15.87 | -157.88 | 0.86 | 1.00 | 2.02 | -999 |
| 9 | 16.04 | -157.88 | 0.85 | 0.94 | 1.98 | -999 |
| 9 | 16.30 | -157.88 | 0.91 | 0.96 | 1.85 | -999 |
| 9 | 16.43 | -157.88 | 0.86 | 0.86 | 2.04 | -999 |
| 9 | 16.67 | -157.88 | 0.87 | 0.85 | 2.24 | -999 |

|   |       |         |      |      |      |      |
|---|-------|---------|------|------|------|------|
| 9 | 16.80 | -157.88 | 0.89 | 0.89 | 2.40 | -999 |
| 9 | 17.06 | -157.89 | 0.94 | 0.93 | 2.36 | -999 |
| 9 | 17.19 | -157.89 | 0.94 | 0.88 | 2.58 | -999 |
| 9 | 17.46 | -157.88 | 0.99 | 1.07 | 2.59 | -999 |
| 9 | 17.60 | -157.88 | 0.95 | 0.97 | 2.68 | -999 |
| 9 | 17.87 | -157.88 | 0.89 | 1.09 | 2.58 | -999 |
| 9 | 18.01 | -157.88 | 0.89 | 1.03 | 2.80 | -999 |
| 9 | 18.14 | -157.88 | 1.00 | 0.96 | 2.72 | -999 |
| 9 | 18.28 | -157.88 | 0.99 | 0.97 | 2.65 | -999 |
| 9 | 18.54 | -157.88 | 0.96 | 1.13 | 2.81 | -999 |
| 9 | 18.67 | -157.87 | 1.02 | 1.15 | 2.38 | -999 |
| 9 | 18.92 | -157.88 | 0.91 | 1.05 | 2.30 | -999 |
| 9 | 19.08 | -157.88 | 0.92 | 0.97 | 2.58 | -999 |
| 9 | 19.34 | -157.88 | 0.98 | 0.93 | 2.67 | -999 |
| 9 | 19.48 | -157.88 | 0.95 | 0.85 | 2.71 | -999 |
| 9 | 19.75 | -157.88 | 0.98 | 0.99 | 2.58 | -999 |
| 9 | 19.88 | -157.88 | 1.03 | 1.15 | 2.48 | -999 |
| 9 | 20.14 | -157.89 | 0.93 | 0.94 | 2.91 | -999 |
| 9 | 20.27 | -157.88 | 0.91 | 0.82 | 2.74 | -999 |
| 9 | 21.57 | -157.38 | 1.11 | 1.36 | 4.13 | -999 |
| 9 | 21.76 | -157.29 | 1.07 | 1.17 | 3.15 | -999 |
| 9 | 22.04 | -157.16 | 1.11 | 1.14 | 3.22 | -999 |
| 9 | 22.18 | -157.09 | 1.09 | 1.08 | 3.25 | -999 |
| 9 | 22.48 | -156.96 | 1.14 | 1.07 | 2.78 | -999 |
| 9 | 22.63 | -156.88 | 1.15 | 1.05 | 2.85 | -999 |
| 9 | 22.92 | -156.74 | 1.13 | 0.94 | 2.49 | -999 |
| 9 | 23.08 | -156.67 | 1.13 | 0.94 | 2.67 | -999 |
| 9 | 23.38 | -156.53 | 1.12 | 1.03 | 3.07 | -999 |
| 9 | 23.53 | -156.46 | 1.15 | 1.04 | 2.84 | -999 |
| 9 | 23.83 | -156.31 | 1.14 | 1.11 | 2.84 | -999 |
| 9 | 23.86 | -156.30 | 1.14 | 1.05 | 2.83 | -999 |
| 9 | 24.12 | -156.17 | 1.13 | 0.99 | 3.36 | -999 |
| 9 | 24.27 | -156.10 | 1.12 | 0.99 | 3.26 | -999 |
| 9 | 24.57 | -155.96 | 1.09 | 0.90 | 2.48 | -999 |
| 9 | 24.72 | -155.88 | 1.20 | 0.97 | 2.45 | -999 |
| 9 | 25.02 | -155.74 | 1.15 | 1.08 | 2.26 | -999 |
| 9 | 25.17 | -155.67 | 1.13 | 1.06 | 2.64 | -999 |
| 9 | 25.48 | -155.52 | 1.16 | 1.10 | 2.63 | -999 |
| 9 | 25.62 | -155.45 | 1.15 | 1.09 | 2.52 | -999 |
| 9 | 25.96 | -155.29 | 1.12 | 1.09 | 2.43 | -999 |
| 9 | 26.14 | -155.20 | 1.14 | 1.03 | 3.10 | -999 |
| 9 | 26.50 | -155.03 | 1.11 | 1.10 | 3.20 | -999 |
| 9 | 26.67 | -154.94 | 1.12 | 1.07 | 2.91 | -999 |
| 9 | 27.03 | -154.77 | 1.20 | 1.10 | 1.89 | -999 |
| 9 | 27.21 | -154.68 | 1.15 | 0.97 | 2.15 | -999 |
| 9 | 27.56 | -154.51 | 1.13 | 1.14 | 2.65 | -999 |
| 9 | 27.59 | -154.49 | 1.13 | 1.12 | 2.76 | -999 |

|   |       |         |      |      |      |      |
|---|-------|---------|------|------|------|------|
| 9 | 27.81 | -154.38 | 1.09 | 1.14 | 2.65 | -999 |
| 9 | 27.97 | -154.30 | 1.12 | 1.04 | 2.64 | -999 |
| 9 | 28.39 | -154.10 | 1.16 | 1.02 | 2.26 | -999 |
| 9 | 28.56 | -154.01 | 1.36 | 1.00 | 1.99 | -999 |
| 9 | 28.91 | -153.84 | 1.33 | 1.13 | 3.08 | -999 |
| 9 | 29.09 | -153.75 | 1.37 | 1.20 | 3.50 | -999 |
| 9 | 29.43 | -153.58 | 1.33 | 1.17 | 3.49 | -999 |
| 9 | 29.61 | -153.49 | 1.32 | 1.10 | 3.49 | -999 |
| 9 | 29.98 | -153.31 | 1.41 | 1.32 | 3.11 | -999 |
| 9 | 30.36 | -153.11 | 1.54 | 1.27 | 3.91 | -999 |
| 9 | 30.73 | -152.93 | 1.52 | 1.34 | 4.27 | -999 |
| 9 | 30.91 | -152.83 | 1.52 | 1.34 | 4.40 | -999 |
| 9 | 31.27 | -152.65 | 1.70 | 1.44 | 5.43 | -999 |
| 9 | 31.45 | -152.56 | 1.79 | 1.34 | 4.33 | -999 |
| 9 | 31.63 | -152.47 | 1.74 | 1.31 | 3.89 | -999 |
| 9 | 31.80 | -152.38 | 1.82 | 1.35 | 2.85 | -999 |
| 9 | 32.17 | -152.19 | 1.82 | 1.44 | 2.57 | -999 |
| 9 | 32.35 | -152.10 | 1.82 | 1.42 | 3.14 | -999 |
| 9 | 32.73 | -151.90 | 1.85 | 1.49 | 3.89 | -999 |
| 9 | 33.32 | -151.59 | 1.73 | 1.42 | 3.90 | -999 |
| 9 | 33.50 | -151.50 | 1.84 | 1.42 | 4.89 | -999 |
| 9 | 33.80 | -151.34 | 1.83 | 1.47 | 4.51 | -999 |
| 9 | 33.98 | -151.25 | 1.85 | 1.52 | 4.36 | -999 |
| 9 | 34.34 | -151.06 | 1.94 | 1.71 | 3.06 | -999 |
| 9 | 34.52 | -150.96 | 1.94 | 1.49 | 3.05 | -999 |
| 9 | 34.89 | -150.77 | 1.93 | 1.60 | 3.23 | -999 |
| 9 | 35.07 | -150.67 | 1.89 | 1.61 | 3.51 | -999 |
| 9 | 35.44 | -150.47 | 1.94 | 1.74 | 3.61 | -999 |
| 9 | 35.62 | -150.38 | 1.96 | 1.71 | 3.47 | -999 |
| 9 | 35.79 | -150.29 | 2.00 | 1.84 | 3.59 | -999 |
| 9 | 36.47 | -149.92 | 2.09 | 1.72 | 3.80 | -999 |
| 9 | 36.65 | -149.82 | 2.14 | 1.60 | 3.92 | -999 |
| 9 | 37.01 | -149.63 | 2.24 | 1.81 | 4.65 | -999 |
| 9 | 37.18 | -149.53 | 2.10 | 1.79 | 4.02 | -999 |
| 9 | 37.55 | -149.33 | 2.80 | 2.11 | 4.66 | -999 |
| 9 | 37.72 | -149.24 | 2.99 | 2.05 | 5.16 | -999 |
| 9 | 38.09 | -149.03 | 2.58 | 2.10 | 5.23 | -999 |
| 9 | 38.28 | -148.94 | 2.56 | 2.04 | 4.94 | -999 |
| 9 | 38.69 | -148.94 | 2.53 | 2.07 | 3.61 | -999 |
| 9 | 38.88 | -148.94 | 2.81 | 2.31 | 4.65 | -999 |
| 9 | 39.29 | -148.94 | 3.09 | 2.24 | 4.22 | -999 |
| 9 | 39.49 | -148.94 | 2.76 | 2.21 | 5.02 | -999 |
| 9 | 39.88 | -148.94 | 2.78 | 2.33 | 5.29 | -999 |
| 9 | 39.99 | -148.94 | 3.16 | 2.55 | 4.94 | -999 |
| 9 | 40.28 | -148.94 | 3.32 | 2.78 | 3.49 | -999 |
| 9 | 40.48 | -148.94 | 3.35 | 2.82 | 5.19 | -999 |
| 9 | 40.88 | -148.94 | 3.25 | 3.86 | 5.27 | -999 |



|   |       |         |      |      |      |      |
|---|-------|---------|------|------|------|------|
| 9 | 41.08 | -148.94 | 3.46 | 3.50 | 3.89 | -999 |
| 9 | 41.48 | -148.94 | 3.37 | 3.96 | 4.51 | -999 |
| 9 | 41.68 | -148.94 | 3.24 | 3.76 | 4.01 | -999 |
| 9 | 42.09 | -148.94 | 2.91 | 3.00 | 3.29 | -999 |
| 9 | 42.28 | -148.95 | 2.86 | 2.72 | 4.10 | -999 |
| 9 | 42.66 | -148.94 | 3.03 | 3.86 | 5.18 | -999 |
| 9 | 42.86 | -148.94 | 3.02 | 3.35 | 5.10 | -999 |
| 9 | 43.25 | -148.94 | 2.68 | 2.51 | 3.80 | -999 |
| 9 | 43.45 | -148.94 | 2.65 | 2.42 | 3.37 | -999 |
| 9 | 43.85 | -148.94 | 2.78 | 2.48 | 3.81 | -999 |
| 9 | 44.06 | -148.94 | 2.88 | 2.49 | 3.90 | -999 |
| 9 | 44.45 | -148.94 | 2.90 | 2.58 | 4.10 | -999 |
| 9 | 44.57 | -148.94 | 2.80 | 2.55 | 4.41 | -999 |
| 9 | 44.57 | -148.94 | 2.84 | 2.58 | 4.42 | -999 |
| 9 | 44.57 | -148.94 | 2.91 | 2.52 | 4.36 | -999 |
| 9 | 44.57 | -148.74 | 2.96 | 2.38 | 4.17 | -999 |
| 9 | 44.57 | -148.54 | 2.96 | 2.20 | 3.82 | -999 |
| 9 | 44.57 | -148.10 | 2.92 | 2.41 | 3.68 | -999 |
| 9 | 44.57 | -147.90 | 2.79 | 2.32 | 3.41 | -999 |
| 9 | 44.57 | -147.53 | 2.77 | 2.44 | 3.60 | -999 |
| 9 | 44.57 | -147.48 | 2.78 | 2.42 | 3.73 | -999 |
| 9 | 44.57 | -147.41 | 2.85 | 2.61 | 3.67 | -999 |
| 9 | 44.57 | -147.16 | 2.82 | 2.42 | 3.46 | -999 |
| 9 | 44.57 | -146.68 | 2.67 | 2.56 | 3.42 | -999 |
| 9 | 44.57 | -146.43 | 2.91 | 2.49 | 3.45 | -999 |
| 9 | 44.57 | -145.95 | 2.79 | 2.49 | 4.75 | -999 |
| 9 | 44.58 | -145.70 | 2.90 | 2.30 | 4.17 | -999 |
| 9 | 44.58 | -145.21 | 3.75 | 2.32 | 3.62 | -999 |
| 9 | 44.58 | -145.00 | 3.56 | 2.29 | 3.75 | -999 |
| 9 | 44.58 | -144.74 | 3.41 | 2.37 | 3.70 | -999 |
| 9 | 44.58 | -144.49 | 3.15 | 2.41 | 3.24 | -999 |
| 9 | 44.58 | -144.00 | 2.93 | 2.27 | 3.01 | -999 |
| 9 | 44.58 | -143.75 | 2.85 | 2.42 | 3.04 | -999 |
| 9 | 44.58 | -143.25 | 2.77 | 2.22 | 3.29 | -999 |
| 9 | 44.58 | -143.00 | 2.99 | 2.25 | 3.49 | -999 |
| 9 | 44.58 | -142.50 | 2.82 | 2.26 | 2.22 | -999 |
| 9 | 44.58 | -142.43 | 2.87 | 2.17 | 2.51 | -999 |
| 9 | 44.58 | -142.44 | 2.97 | 2.33 | 2.62 | -999 |
| 9 | 44.58 | -142.44 | 2.99 | 2.29 | 2.76 | -999 |
| 9 | 44.58 | -142.13 | 2.96 | 2.21 | 3.05 | -999 |
| 9 | 44.58 | -141.89 | 2.86 | 2.16 | 2.80 | -999 |
| 9 | 44.58 | -141.40 | 2.87 | 2.09 | 2.62 | -999 |
| 9 | 44.58 | -141.15 | 2.82 | 2.08 | 2.72 | -999 |
| 9 | 44.58 | -140.84 | 2.95 | 2.14 | 2.41 | -999 |
| 9 | 44.58 | -140.64 | 2.98 | 2.15 | 2.44 | -999 |
| 9 | 44.58 | -140.15 | 3.87 | 2.50 | 2.94 | -999 |
| 9 | 44.58 | -139.90 | 3.24 | 2.04 | 2.23 | -999 |

|    |       |         |      |      |      |      |
|----|-------|---------|------|------|------|------|
| 9  | 44.58 | -139.42 | 3.08 | 2.10 | 2.59 | -999 |
| 9  | 44.58 | -138.31 | 3.14 | 2.31 | 3.74 | -999 |
| 9  | 44.58 | -138.09 | 3.01 | 2.15 | 2.52 | -999 |
| 9  | 44.58 | -137.60 | 2.99 | 2.18 | 2.32 | -999 |
| 9  | 44.59 | -137.36 | 3.18 | 1.95 | 2.56 | -999 |
| 9  | 44.59 | -136.87 | 3.47 | 2.44 | 5.83 | -999 |
| 9  | 44.59 | -136.62 | 3.32 | 2.19 | 4.50 | -999 |
| 9  | 44.59 | -136.41 | 2.89 | 2.10 | 2.78 | -999 |
| 9  | 44.59 | -136.41 | 2.87 | 2.02 | 3.04 | -999 |
| 9  | 44.59 | -136.41 | 2.91 | 2.02 | 3.08 | -999 |
| 9  | 44.59 | -136.33 | 2.93 | 2.05 | 2.97 | -999 |
| 9  | 44.59 | -135.84 | 3.05 | 2.14 | 3.96 | -999 |
| 9  | 44.59 | -135.60 | 3.00 | 1.90 | 2.30 | -999 |
| 9  | 44.59 | -135.11 | 2.89 | 1.92 | 2.15 | -999 |
| 9  | 44.59 | -134.86 | 2.93 | 1.94 | 2.27 | -999 |
| 9  | 44.59 | -134.36 | 2.94 | 2.18 | 3.51 | -999 |
| 9  | 44.59 | -134.11 | 2.80 | 2.23 | 4.44 | -999 |
| 9  | 44.59 | -133.62 | 2.62 | 2.01 | 3.49 | -999 |
| 9  | 44.59 | -133.39 | 2.81 | 1.97 | 3.90 | -999 |
| 9  | 44.59 | -132.90 | 2.61 | 2.04 | 3.67 | -999 |
| 9  | 44.59 | -132.66 | 2.66 | 2.11 | 3.47 | -999 |
| 9  | 44.59 | -132.17 | 2.49 | 2.05 | 3.53 | -999 |
| 9  | 44.59 | -131.93 | 2.49 | 1.88 | 3.80 | -999 |
| 9  | 44.59 | -131.44 | 2.46 | 1.83 | 3.42 | -999 |
| 9  | 44.59 | -131.19 | 2.62 | 1.79 | 4.00 | -999 |
| 9  | 44.59 | -130.99 | 2.55 | 1.90 | 3.23 | -999 |
| 9  | 44.59 | -130.99 | 2.57 | 1.92 | 3.41 | -999 |
| 9  | 44.59 | -130.98 | 2.59 | 2.01 | 3.40 | -999 |
| 9  | 44.59 | -130.98 | 2.59 | 1.94 | 3.60 | -999 |
| 9  | 44.59 | -130.68 | 2.46 | 1.84 | 3.53 | -999 |
| 9  | 44.59 | -130.39 | 2.40 | 1.93 | 3.59 | -999 |
| 9  | 44.59 | -129.81 | 2.39 | 1.99 | 3.52 | -999 |
| 9  | 44.59 | -129.51 | 2.49 | 1.73 | 3.35 | -999 |
| 9  | 44.60 | -128.92 | 2.42 | 1.81 | 2.27 | -999 |
| 9  | 44.60 | -128.62 | 2.49 | 1.74 | 3.42 | -999 |
| 9  | 44.60 | -128.03 | 2.54 | 1.87 | 3.58 | -999 |
| 9  | 44.60 | -127.74 | 2.51 | 1.77 | 3.41 | -999 |
| 9  | 44.60 | -127.14 | 2.29 | 1.69 | 2.98 | -999 |
| 9  | 44.60 | -126.84 | 2.39 | 1.78 | 3.08 | -999 |
| 9  | 44.60 | -126.24 | 2.66 | 1.78 | 4.35 | -999 |
| 9  | 44.60 | -125.93 | 2.59 | 2.05 | 2.96 | -999 |
| 9  | 44.59 | -125.34 | 3.09 | 2.80 | 2.99 | -999 |
| 9  | 44.57 | -125.06 | 3.10 | 3.38 | 2.88 | -999 |
| 9  | 44.58 | -124.77 | 3.53 | 4.42 | 3.92 | -999 |
| 9  | 44.57 | -124.50 | 4.20 | 7.92 | 4.54 | -999 |
| 10 | 10.79 | 173.08  | 1.38 | 0.72 | 0.56 | -999 |
| 10 | 10.88 | 173.32  | 1.65 | 0.84 | 0.73 | -999 |

|    |       |         |      |      |      |      |
|----|-------|---------|------|------|------|------|
| 10 | 11.05 | 173.80  | 1.84 | 0.67 | 0.66 | -999 |
| 10 | 11.14 | 174.03  | 1.71 | 0.72 | 0.79 | -999 |
| 10 | 11.32 | 174.51  | 1.18 | 0.49 | 0.68 | -999 |
| 10 | 11.41 | 174.75  | 1.31 | 0.61 | 0.76 | -999 |
| 10 | 11.58 | 175.21  | 1.11 | 0.50 | 0.72 | -999 |
| 10 | 11.67 | 175.45  | 1.30 | 0.63 | 0.77 | -999 |
| 10 | 13.61 | -179.25 | -999 | -999 | -999 | -999 |
| 10 | 13.73 | -178.93 | -999 | -999 | -999 | -999 |
| 10 | 13.90 | -178.45 | -999 | -999 | -999 | -999 |
| 10 | 14.02 | -178.13 | -999 | -999 | -999 | -999 |
| 10 | 14.20 | -177.64 | -999 | -999 | -999 | -999 |
| 10 | 14.32 | -177.31 | -999 | -999 | -999 | -999 |
| 10 | 14.50 | -176.81 | -999 | -999 | -999 | -999 |
| 10 | 14.62 | -176.48 | -999 | -999 | -999 | -999 |
| 10 | 14.81 | -175.97 | -999 | -999 | -999 | -999 |
| 10 | 14.93 | -175.64 | -999 | -999 | -999 | -999 |
| 10 | 15.11 | -175.14 | -999 | -999 | -999 | -999 |
| 10 | 15.22 | -174.84 | -999 | -999 | -999 | -999 |
| 10 | 15.38 | -174.39 | -999 | -999 | -999 | -999 |
| 10 | 15.49 | -174.09 | -999 | -999 | -999 | -999 |
| 10 | 15.65 | -173.65 | -999 | -999 | -999 | -999 |
| 10 | 15.77 | -173.35 | -999 | -999 | -999 | -999 |
| 10 | 15.93 | -172.89 | -999 | -999 | -999 | -999 |
| 10 | 16.04 | -172.58 | -999 | -999 | -999 | -999 |
| 10 | 16.21 | -172.12 | -999 | -999 | -999 | -999 |
| 10 | 16.32 | -171.81 | -999 | -999 | -999 | -999 |
| 10 | 16.49 | -171.35 | -999 | -999 | -999 | -999 |
| 10 | 16.60 | -171.04 | -999 | -999 | -999 | -999 |
| 10 | 16.77 | -170.56 | -999 | -999 | -999 | -999 |
| 10 | 16.89 | -170.24 | -999 | -999 | -999 | -999 |
| 10 | 17.04 | -169.81 | -999 | -999 | -999 | -999 |
| 10 | 17.14 | -169.53 | -999 | -999 | -999 | -999 |
| 10 | 17.29 | -169.12 | -999 | -999 | -999 | -999 |
| 10 | 17.54 | -168.42 | -999 | -999 | -999 | -999 |
| 10 | 17.64 | -168.14 | -999 | -999 | -999 | -999 |
| 10 | 17.79 | -167.72 | -999 | -999 | -999 | -999 |
| 10 | 17.90 | -167.43 | -999 | -999 | -999 | -999 |
| 10 | 18.05 | -167.00 | -999 | -999 | -999 | -999 |
| 10 | 18.16 | -166.71 | -999 | -999 | -999 | -999 |
| 10 | 18.31 | -166.27 | -999 | -999 | -999 | -999 |
| 10 | 18.41 | -165.98 | -999 | -999 | -999 | -999 |
| 10 | 18.57 | -165.55 | -999 | -999 | -999 | -999 |
| 10 | 18.66 | -165.30 | -999 | -999 | -999 | -999 |
| 10 | 18.80 | -164.92 | -999 | -999 | -999 | -999 |
| 10 | 18.89 | -164.66 | -999 | -999 | -999 | -999 |
| 10 | 19.02 | -164.28 | -999 | -999 | -999 | -999 |
| 10 | 19.11 | -164.04 | -999 | -999 | -999 | -999 |

|    |       |         |      |      |      |      |
|----|-------|---------|------|------|------|------|
| 10 | 19.23 | -163.70 | 4.28 | 0.54 | 1.06 | -999 |
| 10 | 19.29 | -163.52 | 4.90 | 0.74 | 0.92 | -999 |
| 10 | 19.42 | -163.17 | 3.84 | 0.72 | 1.02 | -999 |
| 10 | 19.48 | -163.00 | 4.37 | 0.66 | 0.97 | -999 |
| 10 | 19.60 | -162.66 | 1.70 | 0.78 | 0.92 | -999 |
| 10 | 19.66 | -162.49 | 1.50 | 0.70 | 1.00 | -999 |
| 10 | 19.79 | -162.12 | 1.39 | 0.68 | 0.92 | -999 |
| 10 | 19.86 | -161.93 | 1.47 | 0.79 | 1.36 | -999 |
| 10 | 19.98 | -161.58 | 1.66 | 0.73 | 0.97 | -999 |
| 10 | 20.04 | -161.41 | 1.73 | 0.75 | 1.19 | -999 |
| 10 | 20.17 | -161.04 | 4.05 | 0.94 | 1.50 | -999 |
| 10 | 20.24 | -160.86 | 3.85 | 0.89 | 1.20 | -999 |
| 10 | 20.37 | -160.50 | 2.75 | 0.67 | 0.79 | -999 |
| 10 | 20.43 | -160.32 | 2.32 | 0.76 | 1.10 | -999 |
| 10 | 20.55 | -159.97 | 1.39 | 0.73 | 1.02 | -999 |
| 10 | 20.62 | -159.79 | 1.54 | 0.78 | 1.53 | -999 |
| 10 | 20.74 | -159.44 | 1.17 | 0.71 | 1.37 | -999 |
| 10 | 20.80 | -159.27 | 1.24 | 0.70 | 1.41 | -999 |
| 10 | 20.92 | -158.92 | 1.29 | 0.69 | 1.10 | -999 |
| 10 | 20.98 | -158.75 | 1.71 | 0.74 | 1.58 | -999 |
| 10 | 21.10 | -158.41 | 1.20 | 0.54 | 1.27 | -999 |
| 10 | 21.16 | -158.23 | 1.45 | 0.75 | 1.57 | -999 |
| 10 | 21.24 | -158.01 | 6.16 | 1.78 | 1.51 | -999 |
| 10 | 21.62 | -158.39 | 4.59 | 0.85 | 2.49 | -999 |
| 10 | 21.85 | -158.50 | 4.68 | 1.03 | 1.89 | -999 |
| 10 | 22.29 | -158.70 | 5.52 | 1.43 | 2.05 | -999 |
| 10 | 22.51 | -158.80 | 3.41 | 1.07 | 1.88 | -999 |
| 10 | 22.94 | -159.01 | 2.73 | 1.04 | 2.83 | -999 |
| 10 | 23.16 | -159.11 | 3.17 | 1.09 | 2.61 | -999 |
| 10 | 23.60 | -159.32 | 2.17 | 0.89 | 2.78 | -999 |
| 10 | 23.83 | -159.43 | 2.20 | 0.98 | 2.66 | -999 |
| 10 | 24.27 | -159.64 | 2.18 | 0.86 | 2.69 | -999 |
| 10 | 24.48 | -159.74 | 2.25 | 0.89 | 2.76 | -999 |
| 10 | 24.92 | -159.95 | 2.10 | 0.86 | 2.84 | -999 |
| 10 | 25.14 | -160.05 | 1.81 | 0.84 | 2.82 | -999 |
| 10 | 25.56 | -160.25 | 1.96 | 0.86 | 2.98 | -999 |
| 10 | 25.77 | -160.36 | 1.96 | 0.87 | 2.86 | -999 |
| 10 | 26.22 | -160.57 | 1.97 | 0.88 | 3.04 | -999 |
| 10 | 26.44 | -160.68 | 2.15 | 0.91 | 3.01 | -999 |
| 10 | 26.87 | -160.89 | 2.13 | 0.95 | 3.02 | -999 |
| 10 | 27.09 | -160.99 | 2.11 | 0.92 | 2.85 | -999 |
| 10 | 27.52 | -161.20 | 2.06 | 0.96 | 2.69 | -999 |
| 10 | 27.73 | -161.31 | 1.78 | 0.85 | 2.59 | -999 |
| 10 | 28.16 | -161.52 | 1.74 | 0.84 | 2.66 | -999 |
| 10 | 28.37 | -161.62 | 1.94 | 0.83 | 2.78 | -999 |
| 10 | 28.79 | -161.83 | 1.99 | 0.84 | 3.15 | -999 |
| 10 | 29.01 | -161.94 | 1.92 | 0.88 | 2.97 | -999 |

|    |       |         |      |      |      |      |
|----|-------|---------|------|------|------|------|
| 10 | 29.45 | -162.15 | 1.97 | 0.85 | 2.54 | -999 |
| 10 | 29.66 | -162.26 | 2.03 | 0.88 | 2.73 | -999 |
| 10 | 30.08 | -162.47 | 2.42 | 0.89 | 2.64 | -999 |
| 10 | 30.30 | -162.58 | 2.11 | 0.88 | 2.45 | -999 |
| 10 | 30.74 | -162.80 | 1.76 | 0.85 | 1.82 | -999 |
| 10 | 30.96 | -162.91 | 1.81 | 0.82 | 1.93 | -999 |
| 10 | 31.38 | -163.12 | 1.91 | 0.83 | 2.20 | -999 |
| 10 | 31.59 | -163.24 | 1.99 | 0.86 | 2.28 | -999 |
| 10 | 32.01 | -163.45 | 2.15 | 0.87 | 2.18 | -999 |
| 10 | 32.21 | -163.55 | -999 | -999 | -999 | -999 |
| 10 | 32.83 | -163.87 | 2.11 | 0.85 | 2.22 | -999 |
| 10 | 33.05 | -163.98 | 2.19 | 0.89 | 2.30 | -999 |
| 10 | 33.46 | -164.19 | 1.79 | 0.85 | 1.98 | -999 |
| 10 | 33.66 | -164.30 | 1.82 | 0.88 | 2.04 | -999 |
| 10 | 34.06 | -164.51 | 1.78 | 0.89 | 1.78 | -999 |
| 10 | 34.26 | -164.61 | -999 | -999 | -999 | -999 |
| 10 | 34.66 | -164.82 | 2.07 | 1.00 | 1.96 | -999 |
| 10 | 34.86 | -164.92 | 2.23 | 1.07 | 1.90 | -999 |
| 10 | 34.90 | -164.92 | 2.06 | 1.05 | 1.69 | -999 |
| 10 | 34.93 | -164.92 | 2.03 | 1.01 | 1.69 | -999 |
| 10 | 34.99 | -164.91 | 2.05 | 1.04 | 1.63 | -999 |
| 10 | 34.94 | -164.96 | 1.97 | 1.04 | 1.67 | -999 |
| 10 | 34.94 | -164.90 | 2.04 | 0.98 | 1.67 | -999 |
| 10 | 34.94 | -164.90 | 2.07 | 0.99 | 1.58 | -999 |
| 10 | 34.94 | -164.90 | 2.09 | 1.02 | 1.61 | -999 |
| 10 | 34.97 | -164.94 | 2.06 | 1.00 | 1.72 | -999 |
| 10 | 35.39 | -165.00 | 2.56 | 1.15 | 1.86 | -999 |
| 10 | 35.61 | -165.00 | 2.49 | 1.14 | 1.89 | -999 |
| 10 | 36.07 | -165.00 | 2.47 | 1.18 | 1.80 | -999 |
| 10 | 36.30 | -165.00 | 4.21 | 1.37 | 1.88 | -999 |
| 10 | 36.75 | -165.00 | 1.89 | 1.16 | 1.79 | -999 |
| 10 | 36.98 | -165.00 | 1.96 | 1.25 | 1.95 | -999 |
| 10 | 37.42 | -165.00 | 2.11 | 1.37 | 1.62 | -999 |
| 10 | 37.65 | -165.00 | 2.14 | 1.54 | 1.58 | -999 |
| 10 | 38.11 | -165.00 | 2.16 | 1.51 | 1.68 | -999 |
| 10 | 38.34 | -165.00 | 2.28 | 1.47 | 1.78 | -999 |
| 10 | 38.80 | -165.00 | 2.64 | 1.70 | 2.20 | -999 |
| 10 | 39.03 | -165.00 | 2.60 | 1.66 | 2.48 | -999 |
| 10 | 39.50 | -165.00 | 2.53 | 1.62 | 2.30 | -999 |
| 10 | 39.73 | -165.00 | 2.53 | 1.57 | 2.17 | -999 |
| 10 | 40.18 | -165.00 | 2.74 | 1.68 | 2.88 | -999 |
| 10 | 40.41 | -165.00 | 3.42 | 1.93 | 3.26 | -999 |
| 10 | 40.89 | -165.00 | 3.03 | 1.94 | 2.89 | -999 |
| 10 | 41.12 | -165.00 | 2.91 | 1.94 | 2.32 | -999 |
| 10 | 41.58 | -165.00 | 3.06 | 1.86 | 2.31 | -999 |
| 10 | 41.81 | -165.00 | 3.08 | 1.98 | 2.52 | -999 |
| 10 | 42.24 | -165.00 | 3.24 | 1.87 | 2.09 | -999 |

|    |       |         |       |       |      |      |
|----|-------|---------|-------|-------|------|------|
| 10 | 42.47 | -165.00 | 3.09  | 1.85  | 2.02 | -999 |
| 10 | 42.94 | -165.00 | 4.15  | 1.88  | 2.12 | -999 |
| 10 | 43.17 | -165.00 | 3.27  | 1.88  | 1.97 | -999 |
| 10 | 43.66 | -165.00 | 3.44  | 1.91  | 2.24 | -999 |
| 10 | 43.90 | -165.00 | 3.39  | 2.02  | 2.47 | -999 |
| 10 | 44.38 | -165.00 | 3.66  | 2.27  | 2.67 | -999 |
| 10 | 44.60 | -165.00 | 3.83  | 2.27  | 2.73 | -999 |
| 10 | 45.02 | -165.00 | 4.36  | 2.49  | 3.42 | -999 |
| 10 | 45.23 | -165.00 | -999  | -999  | 3.98 | -999 |
| 10 | 45.68 | -165.00 | 5.84  | 2.95  | 4.21 | -999 |
| 10 | 45.91 | -165.00 | 5.64  | 2.93  | 3.99 | -999 |
| 10 | 46.37 | -165.00 | 5.14  | 2.56  | 2.76 | -999 |
| 10 | 46.59 | -165.00 | 4.96  | 2.45  | 2.91 | -999 |
| 10 | 47.02 | -165.00 | 4.26  | 2.34  | 3.00 | -999 |
| 10 | 47.24 | -165.00 | 4.37  | 2.52  | 2.64 | -999 |
| 10 | 47.71 | -165.00 | 4.25  | 2.69  | 3.28 | -999 |
| 10 | 47.93 | -165.00 | 4.57  | 2.62  | 3.38 | -999 |
| 10 | 48.38 | -165.00 | 4.44  | 2.59  | 2.80 | -999 |
| 10 | 48.61 | -165.00 | 4.51  | 2.59  | 2.96 | -999 |
| 10 | 49.07 | -165.00 | 4.33  | 2.51  | 2.96 | -999 |
| 10 | 49.29 | -165.00 | 4.33  | 2.63  | 2.86 | -999 |
| 10 | 49.75 | -165.00 | 5.34  | 2.84  | 2.80 | -999 |
| 10 | 49.98 | -165.00 | 6.20  | 2.87  | 2.74 | -999 |
| 10 | 50.16 | -165.03 | 6.26  | 3.02  | 2.77 | -999 |
| 10 | 50.38 | -165.11 | 5.45  | 2.74  | 2.97 | -999 |
| 10 | 50.50 | -165.13 | 5.46  | 2.66  | 2.87 | -999 |
| 10 | 50.57 | -164.87 | 5.60  | 2.67  | 3.28 | -999 |
| 10 | 50.51 | -164.88 | 5.33  | 2.68  | 2.79 | -999 |
| 10 | 50.53 | -164.87 | 5.37  | 2.75  | 2.89 | -999 |
| 10 | 50.53 | -164.94 | 5.38  | 2.80  | 2.72 | -999 |
| 10 | 50.54 | -164.95 | 5.43  | 2.81  | 2.71 | -999 |
| 10 | 50.53 | -164.93 | 5.38  | 2.78  | 2.91 | -999 |
| 10 | 50.51 | -164.94 | 5.27  | 2.63  | 2.94 | -999 |
| 10 | 50.89 | -165.11 | 5.74  | 2.84  | 2.71 | -999 |
| 10 | 51.13 | -165.18 | 5.76  | 2.87  | 2.72 | -999 |
| 10 | 51.58 | -165.31 | 6.10  | 2.66  | 2.51 | -999 |
| 10 | 51.81 | -165.38 | 5.60  | 2.75  | 2.76 | -999 |
| 10 | 52.28 | -165.52 | 6.13  | 3.09  | 3.17 | -999 |
| 10 | 52.51 | -165.58 | 6.44  | 3.08  | 2.80 | -999 |
| 10 | 52.94 | -165.72 | 6.64  | 2.98  | 3.25 | -999 |
| 10 | 53.16 | -165.78 | 8.79  | 3.29  | 3.12 | -999 |
| 10 | 53.58 | -165.91 | 21.18 | 6.54  | 2.15 | -999 |
| 10 | 53.78 | -165.97 | 43.61 | 10.02 | 3.94 | -999 |
| 10 | 54.33 | -165.74 | 41.70 | 10.19 | 4.01 | -999 |
| 10 | 54.29 | -165.39 | 30.93 | 7.41  | 3.26 | -999 |
| 10 | 54.09 | -164.66 | 46.34 | 12.33 | 4.01 | -999 |
| 10 | 54.03 | -164.28 | 38.95 | 8.89  | 2.41 | -999 |

|    |       |         |       |      |      |      |
|----|-------|---------|-------|------|------|------|
| 10 | 53.88 | -163.55 | 19.84 | 5.99 | 1.51 | -999 |
| 10 | 53.80 | -163.19 | 20.99 | 6.92 | 2.61 | -999 |
| 10 | 53.63 | -162.51 | 14.15 | 4.60 | 3.23 | -999 |
| 10 | 53.57 | -162.16 | 11.43 | 4.11 | 3.33 | -999 |
| 10 | 53.42 | -161.44 | 8.87  | 3.56 | 2.94 | -999 |
| 10 | 53.34 | -161.06 | 8.52  | 3.58 | 2.93 | -999 |
| 10 | 53.17 | -160.30 | 7.85  | 3.23 | 3.84 | -999 |
| 10 | 53.10 | -159.98 | 7.22  | 2.94 | 2.67 | -999 |
| 10 | 52.86 | -158.88 | 7.48  | 2.94 | 3.03 | -999 |
| 10 | 52.71 | -158.18 | 7.53  | 2.91 | 3.31 | -999 |
| 10 | 52.63 | -157.83 | 6.35  | 2.97 | 2.97 | -999 |
| 10 | 52.64 | -157.30 | 5.94  | 2.86 | 2.65 | -999 |
| 10 | 52.63 | -157.36 | 6.06  | 2.85 | 2.83 | -999 |
| 10 | 52.63 | -157.42 | 6.16  | 2.94 | 2.83 | -999 |
| 10 | 52.64 | -157.21 | 6.25  | 3.05 | 2.77 | -999 |
| 10 | 52.66 | -156.90 | 6.04  | 3.06 | 2.76 | -999 |
| 10 | 52.67 | -156.89 | 6.38  | 2.98 | 2.81 | -999 |
| 10 | 52.66 | -156.94 | 6.59  | 3.02 | 2.68 | -999 |
| 10 | 52.64 | -156.97 | 6.15  | 3.02 | 2.68 | -999 |
| 10 | 52.60 | -157.03 | 5.57  | 3.21 | 2.65 | -999 |
| 10 | 52.60 | -157.06 | 5.20  | 3.03 | 2.62 | -999 |
| 10 | 52.63 | -157.11 | 5.65  | 2.63 | 2.55 | -999 |
| 10 | 52.63 | -157.13 | 6.19  | 3.08 | 2.66 | -999 |
| 10 | 52.67 | -156.88 | 6.04  | 3.02 | 2.64 | -999 |
| 10 | 52.67 | -156.88 | 5.76  | 2.99 | 2.63 | -999 |
| 10 | 52.66 | -156.91 | 5.68  | 3.04 | 2.54 | -999 |
| 10 | 52.65 | -156.95 | 5.52  | 2.92 | 2.49 | -999 |
| 10 | 52.65 | -156.89 | 5.62  | 2.77 | 2.46 | -999 |
| 10 | 52.65 | -156.92 | 5.65  | 2.81 | 2.50 | -999 |
| 10 | 52.56 | -156.83 | 5.61  | 2.86 | 2.54 | -999 |
| 10 | 52.44 | -156.61 | 5.55  | 2.86 | 2.60 | -999 |
| 10 | 52.16 | -156.24 | 5.67  | 2.81 | 2.74 | -999 |
| 10 | 52.12 | -156.34 | 5.76  | 2.78 | 2.38 | -999 |
| 10 | 52.06 | -156.60 | 5.99  | 2.82 | 2.53 | -999 |
| 10 | 52.07 | -156.71 | 6.02  | 2.92 | 2.39 | -999 |
| 10 | 52.15 | -156.92 | 5.88  | 2.92 | 2.62 | -999 |
| 10 | 52.09 | -156.75 | 5.84  | 3.01 | 2.58 | -999 |
| 10 | 52.10 | -156.79 | 5.54  | 2.91 | 2.71 | -999 |
| 10 | 52.10 | -156.80 | 5.97  | 2.91 | 2.74 | -999 |
| 10 | 52.08 | -156.75 | 5.82  | 2.86 | 2.61 | -999 |
| 10 | 52.09 | -156.73 | 5.98  | 2.87 | 2.29 | -999 |
| 10 | 52.09 | -156.64 | 5.98  | 2.78 | 2.23 | -999 |
| 10 | 52.09 | -156.65 | 5.78  | 2.75 | 2.15 | -999 |
| 10 | 52.10 | -156.67 | 5.62  | 2.85 | 2.13 | -999 |
| 10 | 52.09 | -156.66 | 5.85  | 2.83 | 2.10 | -999 |
| 10 | 52.08 | -156.69 | 5.44  | 2.81 | 2.42 | -999 |
| 10 | 52.08 | -156.69 | 5.37  | 2.92 | 2.55 | -999 |

|    |       |         |      |      |      |      |
|----|-------|---------|------|------|------|------|
| 10 | 52.08 | -156.69 | 5.45 | 2.83 | 2.56 | -999 |
| 10 | 52.08 | -156.69 | 5.35 | 2.92 | 2.56 | -999 |
| 10 | 52.08 | -156.69 | 5.55 | 2.78 | 2.30 | -999 |
| 10 | 52.08 | -156.67 | 5.41 | 2.72 | 2.21 | -999 |
| 10 | 52.08 | -156.65 | 5.31 | 2.90 | 2.31 | -999 |
| 10 | 52.08 | -156.65 | 5.35 | 2.97 | 2.38 | -999 |
| 10 | 51.96 | -155.95 | 5.58 | 2.91 | 2.30 | -999 |
| 10 | 51.89 | -155.55 | 5.82 | 2.93 | 2.15 | -999 |
| 10 | 51.75 | -154.77 | 5.93 | 2.88 | 2.28 | -999 |
| 10 | 51.69 | -154.39 | 5.65 | 2.96 | 2.31 | -999 |
| 10 | 51.55 | -153.60 | 5.38 | 2.89 | 2.39 | -999 |
| 10 | 51.48 | -153.21 | 5.38 | 2.85 | 2.26 | -999 |
| 10 | 51.34 | -152.43 | 5.43 | 2.84 | 2.23 | -999 |
| 10 | 51.27 | -152.04 | 5.59 | 2.74 | 2.64 | -999 |
| 10 | 51.13 | -151.28 | 6.10 | 2.80 | 2.33 | -999 |
| 10 | 51.07 | -150.90 | 5.57 | 2.71 | 2.22 | -999 |
| 10 | 50.93 | -150.14 | 5.58 | 2.76 | 2.14 | -999 |
| 10 | 50.86 | -149.76 | 5.41 | 2.79 | 2.00 | -999 |
| 10 | 50.73 | -149.03 | 5.35 | 2.71 | 2.16 | -999 |
| 10 | 50.73 | -148.99 | 5.27 | 2.67 | 2.07 | -999 |
| 10 | 50.75 | -149.06 | 5.66 | 2.62 | 2.10 | -999 |
| 10 | 50.75 | -149.04 | 5.63 | 2.61 | 2.17 | -999 |
| 10 | 50.62 | -148.42 | 4.88 | 2.55 | 2.82 | -999 |
| 10 | 50.55 | -148.03 | 4.54 | 2.58 | 2.68 | -999 |
| 10 | 50.41 | -147.26 | 4.36 | 2.56 | 2.75 | -999 |
| 10 | 50.34 | -146.89 | 4.37 | 2.58 | 2.84 | -999 |
| 10 | 50.21 | -146.14 | 4.20 | 2.62 | 2.72 | -999 |
| 10 | 50.14 | -145.76 | 4.19 | 2.55 | 2.71 | -999 |
| 10 | 50.00 | -145.02 | 4.10 | 2.52 | 2.51 | -999 |
| 10 | 50.00 | -145.00 | 4.40 | 2.52 | 2.48 | -999 |
| 10 | 50.00 | -145.00 | 4.33 | 2.45 | 2.50 | -999 |
| 10 | 50.00 | -145.00 | 4.33 | 2.47 | 2.50 | -999 |
| 10 | 50.01 | -144.94 | 4.36 | 2.52 | 2.44 | -999 |
| 10 | 50.04 | -144.83 | 4.40 | 2.66 | 2.46 | -999 |
| 10 | 50.03 | -144.89 | 4.46 | 2.65 | 2.55 | -999 |
| 10 | 49.99 | -144.99 | 4.39 | 2.67 | 2.61 | -999 |
| 10 | 49.98 | -145.05 | 4.27 | 2.63 | 2.54 | -999 |
| 10 | 50.01 | -144.97 | 4.26 | 2.64 | 2.44 | -999 |
| 10 | 50.01 | -144.91 | 4.30 | 2.56 | 2.41 | -999 |
| 10 | 50.11 | -144.88 | 4.29 | 2.55 | 2.52 | -999 |
| 10 | 50.12 | -144.94 | 4.32 | 2.51 | 2.36 | -999 |
| 10 | 50.04 | -145.09 | 4.20 | 2.60 | 2.26 | -999 |
| 10 | 50.00 | -145.30 | 3.95 | 2.59 | 2.48 | -999 |
| 10 | 50.00 | -145.33 | 3.82 | 2.68 | 2.57 | -999 |
| 10 | 50.00 | -145.51 | 3.76 | 2.50 | 2.70 | -999 |
| 10 | 49.99 | -145.64 | 3.83 | 2.52 | 2.64 | -999 |
| 10 | 50.00 | -145.93 | 4.54 | 2.60 | 2.71 | -999 |



|    |       |         |       |      |      |      |
|----|-------|---------|-------|------|------|------|
| 10 | 50.00 | -145.93 | 4.70  | 2.78 | 2.80 | -999 |
| 10 | 50.00 | -146.25 | 4.81  | 2.23 | 2.77 | -999 |
| 10 | 50.00 | -146.25 | 4.46  | 2.41 | 2.67 | -999 |
| 10 | 50.00 | -146.57 | 4.37  | 3.09 | 2.65 | -999 |
| 10 | 50.03 | -146.52 | 4.30  | 2.91 | 2.65 | -999 |
| 10 | 50.36 | -146.02 | 4.33  | 2.70 | 2.43 | -999 |
| 10 | 50.52 | -145.76 | 4.81  | 2.76 | 2.53 | -999 |
| 10 | 50.85 | -145.24 | 4.78  | 2.76 | 2.33 | -999 |
| 10 | 51.00 | -145.00 | 4.48  | 2.72 | 2.25 | -999 |
| 10 | 50.81 | -145.00 | 4.51  | 2.66 | 2.26 | -999 |
| 10 | 50.79 | -145.00 | 4.61  | 2.68 | 2.26 | -999 |
| 10 | 50.58 | -145.00 | 4.35  | 2.62 | 2.39 | -999 |
| 10 | 50.44 | -145.00 | 4.25  | 2.71 | 2.46 | -999 |
| 10 | 50.30 | -145.00 | 4.49  | 2.67 | 2.39 | -999 |
| 10 | 50.22 | -145.00 | 4.50  | 2.68 | 2.35 | -999 |
| 10 | 50.10 | -145.00 | 4.40  | 2.53 | 2.28 | -999 |
| 10 | 50.04 | -144.96 | 4.47  | 2.55 | 2.37 | -999 |
| 10 | 50.03 | -144.88 | 4.35  | 2.56 | 2.31 | -999 |
| 10 | 50.01 | -144.91 | 4.35  | 2.59 | 2.38 | -999 |
| 10 | 50.53 | -148.92 | 5.80  | 2.70 | 1.13 | -999 |
| 10 | 50.58 | -149.15 | 5.74  | 2.64 | 0.75 | -999 |
| 10 | 50.68 | -149.65 | 5.54  | 2.57 | 0.69 | -999 |
| 10 | 50.74 | -149.94 | 5.25  | 2.60 | 0.65 | -999 |
| 10 | 50.87 | -150.59 | 5.59  | 2.58 | 0.71 | -999 |
| 10 | 50.94 | -150.92 | 5.93  | 2.45 | 0.64 | -999 |
| 10 | 51.07 | -151.57 | 5.84  | 2.57 | 0.94 | -999 |
| 10 | 51.14 | -151.89 | 5.55  | 2.64 | 0.74 | -999 |
| 10 | 51.27 | -152.55 | 5.35  | 2.57 | 0.41 | -999 |
| 10 | 51.34 | -152.90 | 5.87  | 2.53 | 0.42 | -999 |
| 10 | 51.48 | -153.61 | 6.12  | 2.55 | 0.38 | -999 |
| 10 | 51.55 | -153.94 | 6.11  | 2.48 | 0.42 | -999 |
| 10 | 51.69 | -154.67 | 7.17  | 2.44 | 0.31 | -999 |
| 10 | 51.76 | -155.02 | 7.65  | 2.48 | 0.31 | -999 |
| 10 | 51.90 | -155.73 | 6.04  | 2.26 | 0.34 | -999 |
| 10 | 51.94 | -155.92 | 5.88  | 2.44 | 0.31 | -999 |
| 10 | 52.09 | -156.67 | 6.26  | 2.68 | 0.96 | -999 |
| 10 | 52.10 | -156.64 | 6.61  | 2.85 | 1.14 | -999 |
| 10 | 54.28 | -154.82 | 5.73  | 2.69 | 1.12 | -999 |
| 10 | 54.47 | -154.67 | 6.17  | 2.76 | 1.19 | -999 |
| 10 | 54.84 | -154.36 | 5.90  | 2.69 | 1.03 | -999 |
| 10 | 55.02 | -154.20 | -999  | -999 | -999 | -999 |
| 10 | 55.38 | -153.89 | 5.90  | 2.56 | 0.74 | -999 |
| 10 | 55.56 | -153.74 | 5.89  | 2.64 | 0.71 | -999 |
| 10 | 55.90 | -153.43 | 6.17  | 2.88 | 0.76 | -999 |
| 10 | 56.07 | -153.28 | 6.36  | 3.01 | 0.79 | -999 |
| 10 | 56.42 | -152.97 | 11.00 | 4.29 | 0.91 | -999 |
| 10 | 56.58 | -152.83 | 9.38  | 3.55 | 0.80 | -999 |

|    |       |         |       |      |      |      |
|----|-------|---------|-------|------|------|------|
| 10 | 56.92 | -152.53 | 9.78  | 3.45 | 0.89 | -999 |
| 10 | 57.08 | -152.38 | 12.22 | 4.58 | 1.57 | -999 |
| 10 | 57.43 | -152.07 | -999  | -999 | -999 | -999 |
| 10 | 57.59 | -152.02 | -999  | -999 | -999 | -999 |
| 10 | 57.65 | -151.93 | 21.64 | 5.67 | 1.54 | -999 |
| 10 | 57.36 | -151.31 | 14.43 | 4.34 | 1.05 | -999 |
| 10 | 57.21 | -151.00 | 12.58 | 4.22 | 1.06 | -999 |
| 10 | 56.89 | -150.33 | 7.50  | 2.80 | 0.55 | -999 |
| 10 | 56.74 | -150.02 | 16.84 | 2.81 | 0.48 | -999 |
| 10 | 56.43 | -149.39 | 6.67  | 2.71 | 0.48 | -999 |
| 10 | 56.29 | -149.09 | 6.15  | 2.60 | 0.51 | -999 |
| 10 | 56.00 | -148.50 | 5.80  | 2.59 | 0.57 | -999 |
| 10 | 55.85 | -148.20 | 6.34  | 2.72 | 0.95 | -999 |
| 10 | 55.57 | -147.63 | 5.35  | 2.74 | 1.84 | -999 |
| 10 | 55.42 | -147.34 | 5.52  | 2.70 | 1.67 | -999 |
| 10 | 55.14 | -146.77 | 9.06  | 2.77 | 1.67 | -999 |
| 10 | 55.02 | -146.51 | 5.94  | 2.87 | 1.36 | -999 |
| 10 | 54.92 | -146.48 | 5.89  | 2.80 | 1.46 | -999 |
| 10 | 54.71 | -146.41 | 5.58  | 2.73 | 1.20 | -999 |
| 10 | 54.30 | -146.29 | 5.63  | 2.90 | 1.52 | -999 |
| 10 | 54.09 | -146.23 | 5.44  | 2.85 | 1.48 | -999 |
| 10 | 53.68 | -146.11 | 5.28  | 2.78 | 1.54 | -999 |
| 10 | 53.46 | -146.05 | 5.73  | 2.88 | 1.70 | -999 |
| 10 | 53.05 | -145.93 | 6.80  | 2.81 | 1.86 | -999 |
| 10 | 52.85 | -145.87 | 5.93  | 2.79 | 1.81 | -999 |
| 10 | 52.46 | -145.76 | 4.93  | 2.84 | 1.48 | -999 |
| 10 | 52.28 | -145.70 | 5.36  | 2.82 | 1.47 | -999 |
| 10 | 51.90 | -145.58 | 5.21  | 2.82 | 1.70 | -999 |
| 10 | 51.71 | -145.51 | 5.21  | 2.68 | 1.59 | -999 |
| 10 | 51.33 | -145.38 | 5.18  | 2.74 | 2.04 | -999 |
| 10 | 51.13 | -145.33 | 4.96  | 2.77 | 2.10 | -999 |
| 10 | 50.75 | -145.22 | -999  | 2.74 | 1.98 | -999 |
| 10 | 50.55 | -145.16 | 4.99  | 2.65 | 2.01 | -999 |
| 10 | 50.14 | -145.04 | 4.34  | 2.60 | 1.97 | -999 |
| 10 | 50.00 | -145.00 | 4.29  | 2.67 | 1.93 | -999 |
| 10 | 49.90 | -145.00 | 4.14  | 2.62 | 2.02 | -999 |
| 10 | 49.80 | -145.00 | 3.98  | 2.61 | 2.06 | -999 |
| 10 | 49.70 | -145.00 | 4.07  | 2.48 | 2.11 | -999 |
| 10 | 49.60 | -145.00 | 4.12  | 2.47 | 2.16 | -999 |
| 10 | 49.94 | -144.87 | 4.70  | 2.53 | 1.86 | -999 |
| 10 | 50.00 | -144.84 | 4.61  | 2.62 | 1.89 | -999 |
| 10 | 50.00 | -144.53 | 4.40  | 2.53 | 1.84 | -999 |
| 10 | 50.00 | -144.43 | 4.16  | 2.49 | 1.96 | -999 |
| 10 | 50.00 | -144.06 | 3.85  | 2.47 | 2.09 | -999 |
| 10 | 50.00 | -143.89 | 3.64  | 2.46 | 2.05 | -999 |
| 10 | 50.00 | -143.43 | 3.85  | 2.47 | 1.91 | -999 |
| 10 | 50.00 | -143.44 | 4.11  | 2.50 | 1.85 | -999 |

|    |       |         |       |      |      |      |
|----|-------|---------|-------|------|------|------|
| 10 | 50.21 | -143.09 | 4.15  | 2.45 | 2.09 | -999 |
| 10 | 50.37 | -142.81 | 4.28  | 2.45 | 2.01 | -999 |
| 10 | 50.70 | -142.25 | 4.06  | 2.46 | 1.89 | -999 |
| 10 | 50.87 | -141.97 | 4.02  | 2.46 | 1.81 | -999 |
| 10 | 51.19 | -141.40 | 4.26  | 2.61 | 1.90 | -999 |
| 10 | 51.36 | -141.12 | 4.34  | 2.65 | 1.75 | -999 |
| 10 | 51.67 | -140.57 | 4.14  | 2.60 | 1.85 | -999 |
| 10 | 51.83 | -140.30 | 4.12  | 2.45 | 1.95 | -999 |
| 10 | 51.95 | -140.09 | 4.08  | 2.49 | 1.92 | -999 |
| 10 | 51.85 | -139.82 | 4.06  | 2.45 | 1.74 | -999 |
| 10 | 51.63 | -139.19 | 3.80  | 2.46 | 1.85 | -999 |
| 10 | 51.53 | -138.88 | 3.76  | 2.54 | 1.90 | -999 |
| 10 | 51.32 | -138.27 | 3.63  | 2.54 | 1.87 | -999 |
| 10 | 51.20 | -137.98 | 3.61  | 2.49 | 1.96 | -999 |
| 10 | 50.61 | -136.51 | 3.51  | 2.39 | 2.30 | -999 |
| 10 | 50.49 | -136.20 | 3.33  | 2.41 | 2.73 | -999 |
| 10 | 50.24 | -135.59 | 3.39  | 2.35 | 2.18 | -999 |
| 10 | 50.12 | -135.29 | 3.55  | 2.43 | 2.00 | -999 |
| 10 | 50.04 | -134.99 | 3.51  | 2.33 | 1.91 | -999 |
| 10 | 50.02 | -134.97 | 3.55  | 2.51 | 2.06 | -999 |
| 10 | 49.96 | -134.75 | 3.47  | 2.45 | 1.96 | -999 |
| 10 | 49.87 | -134.42 | 3.55  | 2.39 | 2.18 | -999 |
| 10 | 49.68 | -133.77 | 3.83  | 2.46 | 2.24 | -999 |
| 10 | 49.59 | -133.43 | 4.05  | 2.42 | 2.39 | -999 |
| 10 | 49.41 | -132.77 | 4.18  | 2.45 | 2.18 | -999 |
| 10 | 49.33 | -132.45 | 4.24  | 2.50 | 2.33 | -999 |
| 10 | 49.16 | -131.81 | 3.25  | 2.39 | 2.21 | -999 |
| 10 | 49.07 | -131.49 | 3.15  | 2.35 | 2.97 | -999 |
| 10 | 48.94 | -130.81 | 3.26  | 2.34 | 3.90 | -999 |
| 10 | 48.87 | -130.46 | 3.37  | 2.39 | 3.45 | -999 |
| 10 | 48.77 | -129.80 | 5.80  | 3.01 | 1.93 | -999 |
| 10 | 48.69 | -129.46 | 3.34  | 2.13 | 3.24 | -999 |
| 10 | 48.58 | -129.37 | 3.46  | 2.09 | 2.70 | -999 |
| 10 | 48.68 | -129.68 | 3.23  | 2.11 | 3.24 | -999 |
| 10 | 48.68 | -130.14 | 3.94  | 2.38 | 2.82 | -999 |
| 10 | 48.51 | -130.00 | 3.21  | 2.04 | 3.25 | -999 |
| 10 | 48.29 | -129.39 | 3.93  | 2.53 | 2.49 | -999 |
| 10 | 48.36 | -129.16 | 3.38  | 2.14 | 3.05 | -999 |
| 10 | 48.61 | -128.71 | 7.44  | 3.77 | 2.14 | -999 |
| 10 | 48.59 | -128.36 | 6.89  | 3.45 | 1.96 | -999 |
| 10 | 48.56 | -127.66 | -999  | -999 | -999 | -999 |
| 10 | 48.54 | -127.32 | 10.41 | 4.38 | 3.14 | -999 |
| 10 | 48.55 | -126.62 | 11.83 | 4.99 | 4.44 | -999 |
| 10 | 48.55 | -126.27 | 13.09 | 5.68 | 3.86 | -999 |
| 10 | 48.52 | -125.57 | -999  | -999 | -999 | -999 |
| 10 | 48.50 | -125.24 | -999  | -999 | -999 | -999 |
| 11 | 54.90 | -9.24   | 10.08 | -999 | -999 | 2.00 |

|    |       |        |        |       |       |      |
|----|-------|--------|--------|-------|-------|------|
| 11 | 55.11 | -9.52  | 5.59   | -999  | 8.67  | 2.00 |
| 11 | 55.31 | -9.78  | 4.05   | -999  | 10.94 | 2.00 |
| 11 | 55.97 | -10.86 | 2.86   | -999  | 7.41  | 2.00 |
| 11 | 56.22 | -10.84 | 3.88   | -999  | 6.63  | 2.00 |
| 11 | 56.47 | -10.79 | 3.65   | 0.77  | -999  | 2.00 |
| 11 | 56.66 | -10.49 | 3.71   | 0.53  | 6.71  | 2.00 |
| 11 | 56.81 | -10.25 | 3.57   | 0.59  | -999  | 2.00 |
| 11 | 57.11 | -10.51 | 3.64   | -999  | 7.31  | 2.00 |
| 11 | 56.92 | -11.49 | 2.80   | 1.07  | -999  | 2.00 |
| 11 | 56.65 | -11.93 | 6.75   | 2.20  | 21.37 | 2.00 |
| 11 | 56.54 | -12.07 | 6.31   | 1.71  | 24.74 | 2.00 |
| 11 | 56.44 | -12.27 | 6.24   | -999  | 17.65 | 2.00 |
| 11 | 56.50 | -12.17 | 5.90   | 1.87  | 14.26 | 2.00 |
| 11 | 55.81 | -12.32 | 6.72   | 2.66  | 12.63 | 2.00 |
| 11 | 55.68 | -12.31 | 6.23   | 2.48  | 20.88 | 2.00 |
| 11 | 55.58 | -12.44 | 6.76   | 3.11  | 20.21 | 2.00 |
| 11 | 55.69 | -11.91 | 7.15   | 3.46  | 22.34 | 2.00 |
| 11 | 56.39 | -8.81  | 7.10   | 3.92  | 15.86 | 2.00 |
| 11 | 56.26 | -8.77  | 5.91   | -999  | 20.53 | 2.00 |
| 11 | 56.15 | -8.78  | 6.42   | -999  | 19.81 | 2.00 |
| 11 | 56.05 | -8.87  | 6.21   | -999  | 29.79 | 2.00 |
| 11 | 55.99 | -9.00  | 5.76   | -999  | 15.40 | 2.00 |
| 11 | 55.83 | -9.22  | 7.08   | 2.84  | 30.07 | 2.00 |
| 11 | 56.27 | -8.79  | 7.44   | 3.37  | -999  | 2.00 |
| 11 | 56.70 | -8.34  | 17.23  | -999  | 17.11 | 2.00 |
| 11 | 56.89 | -8.32  | 6.09   | -999  | -999  | 2.00 |
| 11 | 56.76 | -8.32  | 22.68  | 6.47  | -999  | 2.00 |
| 11 | 56.63 | -8.36  | 18.36  | 4.68  | 15.87 | 2.00 |
| 11 | 56.53 | -8.50  | 8.26   | -999  | 10.82 | 2.00 |
| 11 | 56.42 | -8.67  | 8.15   | 3.88  | 30.64 | 2.00 |
| 11 | 56.81 | -7.91  | 21.19  | 6.14  | 26.60 | 2.00 |
| 11 | 57.24 | -7.54  | 160.64 | 26.13 | 21.94 | 2.00 |
| 11 | 57.12 | -7.55  | 84.36  | 18.33 | 16.06 | 2.00 |
| 11 | 57.02 | -7.65  | 98.10  | 20.37 | 21.29 | 2.00 |
| 11 | 56.88 | -7.83  | 36.52  | 1.83  | 31.86 | 2.00 |
| 11 | 56.75 | -8.20  | 15.40  | 2.89  | -999  | 2.00 |
| 11 | 56.67 | -8.39  | 11.74  | 1.40  | -999  | 2.00 |
| 11 | 56.54 | -8.51  | 11.78  | 0.63  | -999  | 2.00 |
| 11 | 56.50 | -8.79  | 5.82   | 0.56  | -999  | 2.00 |
| 11 | 56.86 | -8.56  | 6.04   | 2.13  | 14.40 | 2.00 |
| 11 | 56.59 | -8.24  | 11.19  | 0.64  | 16.44 | 2.00 |
| 11 | 56.59 | -8.27  | 10.21  | 2.13  | 23.56 | 2.00 |
| 11 | 56.60 | -8.29  | 12.13  | 3.34  | 22.98 | 2.00 |
| 11 | 56.68 | -8.45  | 11.74  | 1.29  | -999  | 2.00 |
| 11 | 56.76 | -8.59  | 7.00   | 3.47  | -999  | 2.00 |
| 11 | 56.90 | -8.77  | 6.10   | 1.99  | 22.75 | 2.00 |
| 11 | 57.01 | -8.93  | 5.61   | 1.36  | 13.75 | 2.00 |

|       |       |        |       |      |       |      |
|-------|-------|--------|-------|------|-------|------|
| 11    | 56.90 | -8.57  | 6.47  | 2.67 | 18.12 | 2.00 |
| 11    | 56.81 | -8.30  | 12.25 | 1.66 | 8.20  | 2.00 |
| 11    | 56.89 | -8.40  | 4.67  | -999 | 10.85 | 2.00 |
| 11    | 56.99 | -8.52  | 5.33  | -999 | 9.07  | 2.00 |
| 11    | 57.09 | -8.67  | 4.47  | 1.25 | -999  | 2.00 |
| 11    | 56.87 | -9.29  | 4.24  | 1.16 | -999  | 2.00 |
| 11    | 56.07 | -11.47 | 2.91  | -999 | -999  | 2.00 |
| 11    | 55.47 | -12.94 | 3.52  | -999 | -999  | 2.00 |
| 11    | 55.17 | -12.46 | 4.56  | 1.51 | 8.74  | 2.00 |
| 11    | 55.04 | -12.25 | 2.70  | 0.80 | 7.49  | 2.00 |
| 11    | 54.85 | -12.04 | 3.73  | 1.04 | 10.67 | 2.00 |
| <hr/> |       |        |       |      |       |      |
| 12    | 26.02 | -17.94 | 6.04  | 2.42 | 14.05 | 6.00 |
| 12    | 25.65 | -18.24 | 4.47  | 1.57 | 8.17  | 6.00 |
| 12    | 25.15 | -18.64 | 3.04  | 0.97 | 7.74  | 6.00 |
| 12    | 23.85 | -19.67 | 14.98 | 5.01 | 19.68 | 6.00 |
| 12    | 22.61 | -20.65 | 8.34  | 2.77 | 6.57  | 6.00 |
| 12    | 21.85 | -21.24 | 15.00 | 4.80 | 23.97 | 6.00 |
| 12    | 20.98 | -21.91 | 12.03 | 3.56 | 15.72 | 6.00 |
| 12    | 20.22 | -22.50 | 9.35  | 2.30 | 13.42 | 6.00 |
| 12    | 18.13 | -24.11 | 12.17 | 3.82 | 29.95 | 6.00 |
| 12    | 17.16 | -22.57 | 9.72  | 4.57 | 26.32 | 6.00 |
| 12    | 17.23 | -21.52 | 12.24 | 5.16 | 16.78 | 6.00 |
| 12    | 17.28 | -20.75 | 18.38 | 8.31 | 36.49 | 6.00 |
| 12    | 17.29 | -20.30 | 10.84 | 4.10 | 15.95 | 6.00 |
| 12    | 17.24 | -19.89 | 8.02  | 2.81 | 9.02  | 6.00 |
| 12    | 17.16 | -19.32 | 11.78 | 3.38 | 13.30 | 6.00 |
| 12    | 17.28 | -20.24 | 12.12 | 3.88 | 13.67 | 6.00 |
| 12    | 17.22 | -19.77 | 22.99 | 7.35 | -999  | 6.00 |
| 12    | 17.17 | -19.34 | 10.31 | 2.41 | -999  | 6.00 |
| 12    | 17.12 | -18.70 | 25.17 | 6.55 | -999  | 6.00 |
| 12    | 17.13 | -18.17 | 12.24 | 3.94 | -999  | 6.00 |
| 12    | 17.14 | -17.80 | 43.55 | 8.74 | 30.94 | 6.00 |
| 12    | 17.15 | -17.44 | 16.71 | 4.21 | -999  | 6.00 |
| 12    | 17.57 | -18.50 | 12.21 | 2.80 | -999  | 6.00 |
| 12    | 17.72 | -17.95 | 25.38 | 5.86 | -999  | 6.00 |
| 12    | 17.84 | -17.60 | 18.65 | 5.59 | 17.59 | 6.00 |
| 12    | 17.93 | -18.24 | 12.53 | 4.55 | 17.25 | 6.00 |
| 12    | 17.06 | -19.11 | 9.31  | 3.92 | -999  | 6.00 |
| 12    | 16.62 | -19.64 | 9.00  | 3.40 | 13.52 | 6.00 |
| 12    | 16.57 | -20.28 | 7.26  | 2.77 | -999  | 6.00 |
| 12    | 16.52 | -20.82 | 8.34  | 3.29 | -999  | 6.00 |
| 12    | 16.50 | -20.98 | 6.89  | 2.17 | -999  | 6.00 |
| 12    | 16.34 | -19.98 | 3.71  | 1.36 | -999  | 6.00 |
| 12    | 16.36 | -19.32 | 5.93  | 2.20 | 5.05  | 6.00 |
| 12    | 16.40 | -18.89 | 11.37 | 4.00 | 11.48 | 6.00 |
| 12    | 16.48 | -18.01 | 2.60  | 3.00 | 9.87  | 6.00 |
| 12    | 16.54 | -17.35 | 13.37 | 3.85 | -999  | 6.00 |

|    |       |        |       |      |       |      |
|----|-------|--------|-------|------|-------|------|
| 12 | 16.64 | -16.74 | 21.77 | 6.79 | 14.53 | 6.00 |
| 12 | 17.01 | -16.52 | 24.17 | 5.99 | 13.43 | 6.00 |
| 12 | 17.32 | -17.42 | 18.54 | 4.35 | -999  | 6.00 |
| 12 | 17.44 | -17.80 | 30.62 | 5.98 | 21.92 | 6.00 |
| 12 | 17.56 | -16.93 | 29.80 | 5.93 | 6.85  | 6.00 |
| 12 | 17.59 | -16.57 | 42.10 | 6.53 | 7.70  | 6.00 |
| 12 | 18.12 | -16.71 | 37.79 | 7.69 | 19.27 | 6.00 |
| 12 | 18.12 | -17.90 | 9.94  | 2.24 | -999  | 6.00 |
| 12 | 18.13 | -18.28 | 14.57 | 3.93 | -999  | 6.00 |
| 12 | 18.42 | -17.32 | 24.09 | 5.04 | -999  | 6.00 |
| 12 | 18.56 | -16.93 | 23.22 | 5.19 | 19.39 | 6.00 |
| 12 | 18.76 | -16.69 | 14.24 | 4.63 | 15.23 | 6.00 |
| 12 | 19.22 | -16.77 | 16.76 | 5.43 | 16.35 | 6.00 |
| 12 | 19.71 | -17.22 | 40.21 | 5.49 | 10.47 | 6.00 |
| 12 | 20.44 | -17.84 | 18.34 | 4.39 | 7.24  | 6.00 |
| 12 | 20.75 | -18.11 | 14.51 | 3.59 | -999  | 6.00 |
| 12 | 21.05 | -18.39 | 4.99  | 1.54 | 2.63  | 6.00 |
| 12 | 21.47 | -18.31 | 8.51  | 1.83 | -999  | 6.00 |
| 12 | 21.72 | -17.99 | 14.38 | 3.82 | -999  | 6.00 |
| 12 | 21.94 | -17.71 | 8.96  | 2.44 | -999  | 6.00 |
| 12 | 22.26 | -17.24 | 14.39 | 4.59 | 11.97 | 6.00 |
| 12 | 22.72 | -17.30 | 12.14 | 3.72 | -999  | 6.00 |
| 12 | 23.08 | -17.48 | 11.43 | 3.19 | 13.44 | 6.00 |
| 12 | 23.42 | -17.66 | 4.53  | 1.77 | 17.91 | 6.00 |
| 12 | 24.41 | -18.06 | 6.24  | 1.76 | 9.36  | 6.00 |
| 12 | 24.70 | -17.75 | 5.20  | 1.73 | -999  | 6.00 |
| 12 | 24.94 | -17.48 | 5.66  | 1.58 | 12.02 | 6.00 |
| 12 | 25.44 | -17.12 | 4.39  | 1.39 | -999  | 6.00 |
| 12 | 26.27 | -17.36 | 9.89  | 2.42 | -999  | 6.00 |
| 12 | 27.35 | -17.12 | 6.20  | 1.82 | -999  | 6.00 |
| 12 | 27.71 | -16.63 | 18.51 | 3.61 | 16.79 | 6.00 |
| 12 | 27.97 | -16.28 | 22.76 | 3.78 | -999  | 6.00 |
| 12 | 28.42 | -15.85 | 6.97  | 1.69 | 6.61  | 6.00 |
| 12 | 29.00 | -15.55 | 6.17  | 1.36 | 7.42  | 6.00 |
| 12 | 30.25 | -15.14 | 6.27  | 1.63 | 9.90  | 6.00 |
| 12 | 31.10 | -14.86 | 4.17  | 1.03 | -999  | 6.00 |
| 12 | 32.02 | -14.55 | 5.52  | 1.12 | 9.13  | 6.00 |
| 12 | 33.99 | -13.88 | 2.37  | 0.80 | 12.76 | 6.00 |
| 12 | 34.89 | -13.57 | 2.11  | 0.68 | 7.44  | 6.00 |
| 12 | 35.93 | -13.20 | 2.67  | 0.86 | 4.00  | 6.00 |
| 12 | 40.04 | -11.71 | 2.73  | 1.63 | 10.50 | 6.00 |
| 13 | 17.60 | -24.30 | 1.63  | 1.20 | 3.31  | -999 |
| 13 | 17.59 | -24.31 | 1.49  | 1.34 | 3.70  | -999 |
| 13 | 17.60 | -24.30 | 1.33  | 1.23 | 3.42  | -999 |
| 13 | 17.60 | -24.30 | 1.18  | 1.18 | 1.79  | -999 |
| 13 | 17.60 | -24.30 | 1.32  | 1.24 | 3.05  | -999 |
| 13 | 17.60 | -24.30 | 1.09  | 1.15 | 2.26  | -999 |

|    |       |        |       |      |      |      |
|----|-------|--------|-------|------|------|------|
| 13 | 17.60 | -24.30 | 1.20  | 1.22 | 5.40 | -999 |
| 13 | 17.60 | -24.30 | 1.12  | 1.23 | 3.34 | -999 |
| 13 | 17.60 | -24.30 | 1.09  | 1.17 | 2.84 | -999 |
| 13 | 17.60 | -24.30 | 1.04  | 1.03 | 2.78 | -999 |
| 13 | 17.60 | -24.30 | 1.04  | 1.06 | 1.71 | -999 |
| 13 | 17.60 | -24.30 | 1.09  | 1.09 | 2.16 | -999 |
| 13 | 17.60 | -24.30 | 1.06  | 1.10 | 2.42 | -999 |
| 13 | 17.60 | -24.30 | 1.01  | 1.06 | 3.83 | -999 |
| 13 | 17.60 | -24.30 | 1.10  | 1.06 | 3.25 | -999 |
| 13 | 17.60 | -24.31 | 1.14  | 1.13 | 3.51 | -999 |
| 13 | 17.60 | -24.30 | 1.16  | 1.13 | 2.24 | -999 |
| 13 | 17.60 | -24.30 | 1.18  | 1.09 | 3.54 | -999 |
| 13 | 18.00 | -21.00 | 1.86  | 1.48 | 1.96 | -999 |
| 13 | 18.01 | -21.01 | 2.51  | 1.81 | 0.40 | -999 |
| 13 | 18.00 | -21.00 | 1.91  | 1.50 | 0.50 | -999 |
| 13 | 18.00 | -21.00 | 2.26  | 1.59 | 0.99 | -999 |
| 13 | 18.00 | -21.00 | 2.56  | 1.78 | 0.78 | -999 |
| 13 | 18.00 | -21.00 | 3.02  | 1.88 | 0.71 | -999 |
| 13 | 18.00 | -21.00 | 2.87  | 1.97 | 0.66 | -999 |
| 13 | 18.00 | -21.00 | 2.92  | 1.88 | 0.73 | -999 |
| 13 | 18.00 | -21.00 | 2.86  | 1.86 | 1.02 | -999 |
| 13 | 18.00 | -21.00 | 2.72  | 1.86 | 2.00 | -999 |
| 13 | 18.00 | -21.00 | 3.11  | 1.90 | 2.67 | -999 |
| 13 | 18.01 | -21.02 | 2.91  | 1.80 | 0.96 | -999 |
| 13 | 18.00 | -21.00 | 3.25  | 1.93 | 3.06 | -999 |
| 13 | 18.00 | -21.00 | 3.32  | 1.90 | 3.80 | -999 |
| 13 | 18.00 | -21.00 | 3.47  | 1.96 | 2.51 | -999 |
| 13 | 18.00 | -21.00 | 3.26  | 1.91 | 1.88 | -999 |
| 13 | 18.00 | -21.00 | 3.66  | 1.98 | 3.87 | -999 |
| 13 | 18.00 | -21.00 | 3.56  | 2.04 | 2.20 | -999 |
| 13 | 18.00 | -21.00 | 3.79  | 2.07 | 3.02 | -999 |
| 13 | 18.00 | -21.00 | 3.77  | 2.17 | 1.68 | -999 |
| 13 | 18.00 | -18.35 | 7.71  | 3.86 | 2.77 | -999 |
| 13 | 18.00 | -18.00 | 11.26 | 3.77 | 0.18 | -999 |
| 13 | 18.00 | -18.00 | 25.54 | 4.93 | 0.48 | -999 |
| 13 | 18.00 | -18.00 | 23.41 | 4.55 | 1.75 | -999 |
| 13 | 18.00 | -18.00 | 20.27 | 4.07 | 0.98 | -999 |
| 13 | 18.00 | -18.00 | 16.90 | 3.99 | 0.71 | -999 |
| 13 | 18.00 | -18.00 | 17.68 | 4.05 | 1.37 | -999 |
| 13 | 18.00 | -18.00 | 15.56 | 3.90 | 0.46 | -999 |
| 13 | 18.00 | -18.00 | 15.59 | 3.89 | 2.12 | -999 |
| 13 | 18.00 | -18.00 | 15.23 | 3.88 | 1.53 | -999 |
| 13 | 18.00 | -18.00 | 15.00 | 3.92 | 1.17 | -999 |
| 13 | 18.00 | -18.00 | 14.05 | 3.81 | 1.73 | -999 |
| 13 | 18.00 | -18.00 | 14.10 | 3.95 | 1.12 | -999 |
| 13 | 18.00 | -18.00 | 13.70 | 3.87 | 1.86 | -999 |
| 13 | 18.00 | -18.00 | 15.88 | 3.78 | 0.74 | -999 |

|    |       |        |       |      |      |      |
|----|-------|--------|-------|------|------|------|
| 13 | 18.00 | -18.00 | 14.13 | 4.06 | 1.87 | -999 |
| 13 | 18.00 | -18.01 | 14.08 | 3.87 | 1.06 | -999 |
| 13 | 18.00 | -18.00 | 12.52 | 3.06 | 1.17 | -999 |
| 13 | 18.00 | -16.79 | 4.52  | 1.71 | 1.08 | -999 |
| 13 | 18.00 | -16.70 | 4.60  | 2.11 | 4.12 | -999 |
| 13 | 18.00 | -16.53 | 9.31  | 4.52 | 0.43 | -999 |
| 13 | 18.50 | -16.50 | 10.12 | 5.07 | 1.58 | -999 |
| 13 | 18.50 | -16.53 | 8.11  | 4.14 | 1.05 | -999 |
| 13 | 18.50 | -16.50 | 10.78 | 5.14 | 1.02 | -999 |
| 13 | 18.50 | -16.50 | 10.32 | 5.04 | 1.09 | -999 |
| 13 | 18.50 | -16.50 | 10.52 | 5.06 | 2.41 | -999 |
| 13 | 18.50 | -16.51 | 9.68  | 4.93 | 1.07 | -999 |
| 13 | 18.50 | -16.51 | 9.30  | 4.97 | 1.36 | -999 |
| 13 | 18.50 | -16.50 | 11.08 | 5.33 | 0.71 | -999 |
| 13 | 18.50 | -16.50 | 14.06 | 6.10 | 0.76 | -999 |
| 13 | 18.50 | -16.50 | 12.33 | 5.66 | 0.97 | -999 |
| 13 | 18.50 | -16.50 | 11.93 | 5.56 | 1.75 | -999 |
| 13 | 18.50 | -16.50 | 12.48 | 5.55 | 0.58 | -999 |
| 13 | 18.50 | -16.50 | 14.66 | 6.06 | 0.67 | -999 |
| 13 | 18.50 | -16.50 | 14.06 | 5.90 | 2.20 | -999 |
| 13 | 18.50 | -16.50 | 14.15 | 5.88 | 3.35 | -999 |
| 13 | 18.51 | -16.50 | 14.41 | 5.84 | 3.42 | -999 |
| 13 | 18.57 | -16.50 | 14.10 | 5.81 | 2.98 | -999 |
| 13 | 18.83 | -16.50 | 29.57 | 8.63 | 1.18 | -999 |
| 13 | 18.98 | -16.55 | 27.84 | 8.13 | 4.22 | -999 |
| 13 | 19.00 | -16.57 | 29.05 | 8.51 | 2.05 | -999 |
| 13 | 19.00 | -16.57 | 28.31 | 8.61 | 1.26 | -999 |
| 13 | 19.00 | -16.57 | 29.07 | 9.06 | 3.59 | -999 |
| 13 | 19.01 | -16.57 | 27.44 | 8.61 | 0.14 | -999 |
| 13 | 19.01 | -16.57 | 27.80 | 8.80 | 1.70 | -999 |
| 13 | 19.00 | -16.57 | 26.12 | 8.67 | 0.31 | -999 |
| 13 | 19.00 | -16.57 | 26.37 | 8.27 | 0.51 | -999 |
| 13 | 19.00 | -16.57 | 16.89 | 5.62 | 2.39 | -999 |
| 13 | 19.00 | -16.57 | 26.95 | 8.66 | 1.61 | -999 |
| 13 | 19.00 | -16.57 | 42.39 | 9.32 | 2.69 | -999 |
| 13 | 19.00 | -16.57 | 39.97 | 9.09 | 1.35 | -999 |
| 13 | 19.00 | -16.57 | 31.93 | 8.59 | 1.42 | -999 |
| 13 | 19.00 | -16.57 | 34.92 | 9.42 | 4.49 | -999 |
| 13 | 19.00 | -16.57 | 32.07 | 9.01 | 3.66 | -999 |
| 13 | 19.01 | -16.58 | 31.17 | 8.83 | 1.39 | -999 |
| 13 | 19.00 | -16.57 | 29.55 | 8.88 | 3.00 | -999 |
| 13 | 19.00 | -16.57 | 29.65 | 9.00 | 3.16 | -999 |
| 13 | 19.00 | -16.57 | 28.70 | 8.08 | 2.91 | -999 |
| 13 | 19.02 | -16.59 | 29.04 | 9.04 | 3.76 | -999 |
| 13 | 20.00 | -17.25 | 17.49 | 5.81 | 1.14 | -999 |
| 13 | 20.00 | -17.25 | 16.71 | 5.36 | 1.51 | -999 |
| 13 | 20.00 | -17.25 | 16.54 | 5.30 | 0.79 | -999 |



|    |       |        |       |      |       |       |
|----|-------|--------|-------|------|-------|-------|
| 13 | 20.00 | -17.25 | 16.30 | 5.12 | 1.58  | -999  |
| 13 | 20.00 | -17.25 | 16.28 | 5.27 | 3.10  | -999  |
| 13 | 20.00 | -17.25 | 14.02 | 5.32 | 1.93  | -999  |
| 13 | 20.00 | -17.25 | 12.91 | 5.38 | 2.36  | -999  |
| 13 | 20.00 | -17.25 | 12.77 | 5.16 | 1.83  | -999  |
| 13 | 20.00 | -17.25 | 13.47 | 5.19 | 2.39  | -999  |
| 13 | 20.00 | -17.25 | 13.48 | 4.99 | 1.49  | -999  |
| 13 | 20.00 | -17.25 | 15.16 | 5.16 | 1.73  | -999  |
| 13 | 20.00 | -17.25 | 15.77 | 4.99 | 3.45  | -999  |
| 13 | 20.00 | -17.25 | 16.98 | 5.30 | 2.64  | -999  |
| 13 | 20.00 | -17.25 | 16.44 | 4.85 | 2.13  | -999  |
| 13 | 20.00 | -17.25 | 16.93 | 5.03 | 2.95  | -999  |
| 13 | 20.00 | -17.25 | 17.45 | 5.05 | 1.19  | -999  |
| 13 | 20.00 | -17.25 | 13.27 | 4.56 | 1.59  | -999  |
| 13 | 20.00 | -17.25 | 14.07 | 4.77 | 2.18  | -999  |
| 13 | 20.00 | -17.25 | 15.76 | 5.08 | 3.39  | -999  |
| 13 | 20.00 | -17.25 | 14.64 | 4.79 | 1.40  | -999  |
| 13 | 19.00 | -16.57 | 0.18  | 0.05 | 0.01  | 8.00  |
| 13 | 20.00 | -17.25 | 0.10  | 0.03 | 0.01  | 6.20  |
| 14 | -4.00 | -15.00 | 3.16  | 1.58 | 2.20  | 10.00 |
| 14 | -2.02 | -15.01 | 34.66 | 6.55 | 0.39  | 10.00 |
| 14 | 0.00  | -15.00 | 6.12  | 3.58 | 9.36  | 10.00 |
| 14 | 2.00  | -15.00 | 5.79  | 3.74 | 7.06  | 10.00 |
| 14 | -5.01 | -10.00 | 13.68 | 3.90 | 0.13  | 10.00 |
| 14 | -3.01 | -10.00 | 12.66 | 3.63 | 13.45 | 10.00 |
| 14 | 0.00  | -9.88  | 13.66 | 4.57 | 4.87  | 10.00 |
| 14 | -5.04 | -5.01  | 4.73  | 1.40 | 0.32  | 10.00 |
| 14 | -3.01 | -5.01  | 4.53  | 2.02 | 4.28  | 10.00 |
| 14 | -0.98 | -5.05  | 5.08  | 2.86 | 5.78  | 10.00 |
| 14 | -5.01 | 0.00   | 7.98  | 3.16 | 4.42  | 10.00 |
| 14 | -3.01 | 0.00   | 19.93 | 5.49 | 7.39  | 10.00 |
| 14 | -2.04 | -0.09  | 16.35 | 4.49 | 6.00  | 10.00 |
| 14 | 2.83  | -21.08 | 2.80  | 1.58 | 3.92  | -999  |
| 14 | 2.72  | -20.92 | 2.41  | 1.28 | 4.65  | -999  |
| 14 | 2.60  | -20.73 | 2.53  | 1.45 | 5.00  | -999  |
| 14 | 1.76  | -19.38 | 1.72  | 1.17 | 3.70  | -999  |
| 14 | 1.67  | -19.20 | 1.94  | 1.42 | 4.58  | -999  |
| 14 | 1.52  | -19.02 | 3.13  | 2.25 | 4.19  | -999  |
| 14 | 1.12  | -18.73 | 4.01  | 2.62 | 4.38  | -999  |
| 14 | 0.95  | -18.60 | 4.33  | 2.42 | 4.19  | -999  |
| 14 | 0.79  | -18.49 | 5.12  | 2.69 | 3.88  | -999  |
| 14 | 0.60  | -18.35 | 5.65  | 2.72 | 0.32  | -999  |
| 14 | 0.12  | -18.01 | 3.91  | 1.77 | 2.37  | -999  |
| 14 | -0.06 | -17.88 | 1.95  | 1.53 | 2.86  | -999  |
| 14 | -0.21 | -17.76 | 4.15  | 2.09 | 0.76  | -999  |
| 14 | -0.42 | -17.61 | 4.32  | 2.22 | 0.20  | -999  |
| 14 | -0.63 | -17.46 | 4.15  | 2.11 | 4.54  | -999  |

|    |       |        |       |      |       |      |
|----|-------|--------|-------|------|-------|------|
| 14 | -1.62 | -16.74 | 6.09  | 2.24 | 0.05  | -999 |
| 14 | -2.04 | -16.43 | 28.43 | 5.84 | 3.77  | -999 |
| 14 | -2.47 | -16.12 | 33.54 | 5.82 | 5.25  | -999 |
| 14 | -2.83 | -15.85 | 27.92 | 5.38 | 2.66  | -999 |
| 14 | -3.69 | -15.23 | 8.18  | 1.90 | 3.05  | -999 |
| 14 | -3.69 | -15.00 | 7.59  | 2.39 | 3.51  | -999 |
| 14 | -3.00 | -15.00 | 24.55 | 4.67 | 4.14  | -999 |
| 14 | -2.78 | -15.00 | 27.91 | 4.64 | 4.31  | -999 |
| 14 | -2.02 | -15.01 | 34.66 | 6.55 | 0.39  | -999 |
| 14 | -1.99 | -14.97 | 31.33 | 6.07 | 0.13  | -999 |
| 14 | -1.15 | -15.00 | 12.81 | 1.43 | 0.07  | -999 |
| 14 | -1.05 | -14.99 | 6.33  | 2.29 | 3.31  | -999 |
| 14 | -1.09 | -14.99 | 4.36  | 2.11 | 4.20  | -999 |
| 14 | -1.12 | -14.97 | 12.79 | 4.55 | 5.43  | -999 |
| 14 | -1.16 | -14.94 | 5.97  | 3.09 | 5.36  | -999 |
| 14 | -0.27 | -14.93 | 4.13  | 3.31 | 6.77  | -999 |
| 14 | 0.42  | -14.99 | 8.11  | 3.10 | 6.84  | -999 |
| 14 | 1.00  | -15.00 | 6.15  | 2.02 | 4.51  | -999 |
| 14 | 1.22  | -15.00 | 12.22 | 3.68 | 7.72  | -999 |
| 14 | 1.87  | -14.90 | 7.04  | 3.99 | 6.83  | -999 |
| 14 | 1.45  | -14.60 | 7.57  | 3.82 | 4.23  | -999 |
| 14 | 0.94  | -14.24 | 9.69  | 3.30 | 0.15  | -999 |
| 14 | 0.57  | -13.98 | 11.10 | 3.81 | 5.72  | -999 |
| 14 | -0.98 | -12.87 | 7.31  | 2.48 | 3.90  | -999 |
| 14 | -2.53 | -11.77 | 34.90 | 7.43 | 6.68  | -999 |
| 14 | -2.85 | -11.53 | 35.83 | 6.10 | 3.97  | -999 |
| 14 | -3.68 | -10.94 | 7.28  | 3.17 | 4.73  | -999 |
| 14 | -4.28 | -10.52 | 9.89  | 3.24 | 4.13  | -999 |
| 14 | -4.61 | -10.28 | 12.55 | 3.58 | 5.81  | -999 |
| 14 | -4.82 | -10.13 | 12.17 | 3.52 | 5.81  | -999 |
| 14 | -5.00 | -10.00 | 13.45 | 3.59 | 4.91  | -999 |
| 14 | -4.75 | -10.00 | 14.42 | 4.13 | 6.10  | -999 |
| 14 | -3.99 | -9.99  | 14.38 | 4.70 | 7.71  | -999 |
| 14 | -3.01 | -10.00 | 12.66 | 3.63 | 13.45 | -999 |
| 14 | -2.99 | -10.04 | 15.79 | 4.78 | 12.54 | -999 |
| 14 | -2.53 | -10.04 | 29.08 | 6.41 | 9.94  | -999 |
| 14 | -2.08 | -10.01 | 37.04 | 5.56 | 8.37  | -999 |
| 14 | -2.01 | -10.03 | 41.61 | 7.18 | 8.72  | -999 |
| 14 | -1.74 | -10.07 | 34.35 | 7.81 | 10.34 | -999 |
| 14 | -1.00 | -10.00 | 19.73 | 5.34 | 8.98  | -999 |
| 14 | -0.97 | -10.00 | 17.46 | 4.77 | 8.08  | -999 |
| 14 | 0.64  | -9.76  | 17.03 | 5.30 | 6.30  | -999 |
| 14 | 1.26  | -9.81  | 17.20 | 5.35 | 5.89  | -999 |
| 14 | 1.24  | -9.81  | 18.34 | 4.84 | 7.39  | -999 |
| 14 | 0.37  | -9.15  | 10.29 | 4.34 | 6.13  | -999 |
| 14 | 0.09  | -8.93  | 12.18 | 4.08 | 5.78  | -999 |
| 14 | -0.12 | -8.76  | 13.53 | 4.41 | 6.96  | -999 |

|    |       |        |       |      |       |      |
|----|-------|--------|-------|------|-------|------|
| 14 | -0.35 | -8.59  | 16.13 | 4.85 | 6.12  | -999 |
| 14 | -0.54 | -8.44  | 18.71 | 5.33 | 6.18  | -999 |
| 14 | -0.73 | -8.30  | 20.98 | 5.59 | 6.62  | -999 |
| 14 | -0.92 | -8.15  | 16.52 | 3.60 | 5.29  | -999 |
| 14 | -1.27 | -7.88  | 8.84  | 0.91 | 0.14  | -999 |
| 14 | -1.57 | -7.65  | 24.52 | 6.02 | 7.13  | -999 |
| 14 | -2.61 | -6.85  | 8.21  | 2.65 | 7.14  | -999 |
| 14 | -2.98 | -6.56  | 7.37  | 3.20 | 8.93  | -999 |
| 14 | -3.38 | -6.25  | 6.31  | 1.54 | 2.85  | -999 |
| 14 | -3.76 | -5.96  | 13.56 | 3.35 | 5.36  | -999 |
| 14 | -4.09 | -5.70  | 5.86  | 1.91 | 4.33  | -999 |
| 14 | -4.49 | -5.39  | 9.62  | 2.83 | 3.79  | -999 |
| 14 | -4.87 | -5.10  | 8.48  | 2.75 | 3.48  | -999 |
| 14 | -4.21 | -5.00  | 9.64  | 3.13 | 5.14  | -999 |
| 14 | -4.00 | -4.99  | 5.76  | 3.06 | 3.08  | -999 |
| 14 | -3.07 | -5.00  | 8.45  | 2.85 | 5.18  | -999 |
| 14 | -2.78 | -4.99  | 5.40  | 1.75 | 7.40  | -999 |
| 14 | -2.00 | -5.00  | 6.52  | 3.15 | 8.28  | -999 |
| 14 | -1.74 | -4.99  | 5.52  | 2.75 | 6.40  | -999 |
| 14 | -1.10 | -5.00  | 5.46  | 2.67 | 5.39  | -999 |
| 14 | -1.01 | -5.01  | 4.62  | 2.67 | 4.93  | -999 |
| 14 | -0.97 | -5.10  | 4.69  | 2.15 | 4.84  | -999 |
| 14 | -0.96 | -5.15  | 4.80  | 1.97 | 5.66  | -999 |
| 14 | -0.94 | -5.19  | 5.12  | 2.88 | 11.06 | -999 |
| 14 | -0.94 | -5.21  | 3.45  | 1.95 | 6.26  | -999 |
| 14 | -0.62 | -5.14  | 6.59  | 3.19 | 5.82  | -999 |
| 14 | 0.02  | -4.99  | 4.19  | 1.77 | 5.30  | -999 |
| 14 | 1.01  | -5.00  | 1.91  | 1.46 | 2.97  | -999 |
| 14 | 0.38  | -4.48  | 7.02  | 3.07 | 8.81  | -999 |
| 14 | -0.30 | -3.92  | 3.31  | 1.00 | 3.71  | -999 |
| 14 | -2.15 | -2.38  | 7.13  | 1.66 | 4.21  | -999 |
| 14 | -2.47 | -2.11  | 6.18  | 1.47 | 1.77  | -999 |
| 14 | -2.66 | -1.95  | 11.66 | 3.40 | 3.70  | -999 |
| 14 | -2.88 | -1.77  | 13.22 | 3.99 | 3.93  | -999 |
| 14 | -3.28 | -1.44  | 13.39 | 4.29 | 5.49  | -999 |
| 14 | -4.27 | -0.61  | 13.61 | 4.31 | 5.70  | -999 |
| 14 | -4.98 | 0.00   | 9.09  | 3.16 | 3.89  | -999 |
| 14 | -4.31 | 0.00   | 13.23 | 3.66 | 4.48  | -999 |
| 14 | -3.82 | 0.01   | 14.91 | 4.19 | 4.81  | -999 |
| 14 | -3.28 | 0.00   | 16.79 | 5.11 | 7.16  | -999 |
| 14 | -3.01 | 0.00   | 19.93 | 5.49 | 7.39  | -999 |
| 14 | -2.53 | 0.00   | 23.37 | 5.48 | 7.35  | -999 |
| 14 | -1.18 | -0.04  | 5.24  | 2.27 | 5.00  | -999 |
| 14 | -1.01 | 0.01   | 6.44  | 1.50 | 4.42  | -999 |
| 14 | -0.65 | -0.06  | 6.22  | 2.06 | 4.37  | -999 |
| 15 | 42.00 | -10.58 | 11.44 | 4.37 | 3.52  | 0.30 |
| 15 | 36.33 | -12.60 | 14.21 | 3.74 | 1.34  | 0.30 |

|    |          |          |       |       |      |      |
|----|----------|----------|-------|-------|------|------|
| 15 | 33.50    | -13.87   | 9.62  | 2.01  | 0.78 | 0.30 |
| 15 | 27.95    | -22.66   | 8.03  | 1.84  | 0.63 | 0.30 |
| 15 | 23.75    | -27.08   | 5.38  | 1.27  | 2.68 | 0.30 |
| 15 | 18.02    | -27.08   | 3.24  | 1.04  | 1.97 | 0.30 |
| 15 | 12.42    | -28.51   | 5.90  | 1.67  | 2.82 | 0.30 |
| 15 | 9.33     | -29.90   | 3.84  | 1.32  | 1.97 | 0.30 |
| 15 | 3.86     | -29.25   | 5.30  | 1.09  | 3.38 | 0.30 |
| 15 | -1.95    | -29.95   | 3.96  | -999  | -999 | 0.30 |
| 15 | -7.24    | -28.75   | 2.33  | 0.75  | 2.04 | 0.30 |
| 15 | -15.36   | -31.51   | 2.65  | 0.98  | 2.68 | 0.30 |
| 15 | -20.90   | -34.40   | 3.96  | 2.24  | 4.16 | 0.30 |
| 15 | -25.87   | -36.95   | 1.66  | 1.21  | 5.14 | 0.30 |
| 15 | -30.20   | -39.28   | 1.62  | -999  | 3.81 | 0.30 |
| 15 | -34.07   | -43.15   | 3.21  | 1.32  | 5.07 | 0.30 |
| 15 | - 39, 65 | -51.30   | 23.66 | 5.47  | 9.73 | 0.30 |
| 15 | -46.00   | -60.45   | 9.58  | 2.59  | 1.27 | 0.30 |
| 15 | -60.10   | -63.25   | 7.87  | 1.90  | 7.40 | 0.30 |
| 15 | -62.27   | -58.75   | 22.71 | 3.11  | 1.13 | 0.30 |
| 15 | -62.33   | - 57, 68 | 5.94  | 2.01  | 0.42 | 0.30 |
| 15 | -62.20   | -58.92   | 59.32 | 5.18  | 1.06 | 0.30 |
| 15 | -62.13   | -58.43   | 14.60 | 3.74  | 0.78 | 0.30 |
| 15 | -63.29   | -57.97   | 12.94 | 3.62  | 2.18 | 0.30 |
| 15 | -62.98   | -57.15   | 12.98 | 3.91  | 1.41 | 0.30 |
| 15 | -62.28   | -54.50   | 42.58 | 3.86  | 0.42 | 0.30 |
| 15 | -62.28   | -58.68   | 41.99 | 6.21  | 1.13 | 0.30 |
| 15 | -63.66   | -51.33   | 7.60  | 10.13 | -999 | 0.30 |
| 15 | -70.50   | -7.92    | 4.35  | -999  | -999 | 0.30 |
| 15 | -70.37   | -3.62    | -999  | 3.62  | 0.70 | 0.30 |
| 15 | -69.22   | 0.92     | 4.23  | 0.81  | -999 | 0.30 |
| 15 | -70.42   | 12.80    | 1.39  | 1.15  | -999 | 0.30 |
| 15 | -68.67   | 10.45    | 0.79  | 0.46  | 0.56 | 0.30 |
| 15 | -72.50   | 19.72    | -999  | 5.47  | 8.74 | 0.30 |
| 15 | -65.93   | 1.66     | 9.89  | 4.55  | 3.38 | 0.30 |
| 15 | -69.53   | 3.88     | 17.02 | 5.35  | 8.88 | 0.30 |
| 15 | -68.66   | 10.43    | -999  | 0.63  | 1.62 | 0.30 |
| 15 | -68.66   | 10.42    | -999  | -999  | 1.76 | 0.30 |
| 15 | -69.22   | 0.90     | 2.18  | 1.15  | 3.03 | 0.30 |
| 16 | 67.27    | 3.53     | 3.75  | 0.84  | 0.69 | -999 |
| 16 | 67.27    | 3.53     | 4.02  | 0.76  | 0.65 | -999 |
| 16 | 67.18    | 7.50     | 3.18  | 0.64  | 0.70 | -999 |
| 16 | 67.18    | 7.50     | 2.51  | 0.63  | 0.63 | -999 |
| 16 | 67.22    | 6.10     | 3.58  | 0.48  | 0.44 | -999 |
| 16 | 67.22    | 6.10     | 2.98  | 0.50  | 0.36 | -999 |
| 16 | 67.91    | 6.36     | 1.40  | 0.48  | 0.46 | -999 |
| 16 | 70.36    | 6.90     | 1.39  | 0.31  | 0.49 | -999 |
| 16 | 70.36    | 6.90     | 1.38  | 0.41  | 0.47 | -999 |
| 16 | 71.49    | 7.23     | 1.15  | 0.40  | 0.17 | -999 |

|    |       |       |        |      |      |      |
|----|-------|-------|--------|------|------|------|
| 16 | 71.49 | 7.23  | 1.56   | 0.47 | 0.22 | -999 |
| 16 | 73.42 | 7.70  | 1.49   | 0.78 | 0.15 | -999 |
| 16 | 73.42 | 7.70  | 1.28   | 0.52 | 0.17 | -999 |
| 16 | 75.57 | 8.54  | 1.84   | 0.49 | 0.24 | -999 |
| 16 | 76.83 | 9.04  | 2.26   | 0.66 | 0.20 | -999 |
| 16 | 76.83 | 9.04  | 1.77   | 0.48 | 0.20 | -999 |
| 16 | 78.05 | 9.56  | 5.54   | 0.64 | 0.34 | -999 |
| 16 | 78.05 | 9.56  | 3.28   | 0.63 | 0.34 | -999 |
| 16 | 79.06 | 11.30 | 26.80  | 1.29 | 0.81 | -999 |
| 16 | 79.05 | 11.36 | 23.39  | 1.82 | 0.87 | -999 |
| 16 | 79.05 | 11.36 | 33.25  | 1.78 | 1.10 | -999 |
| 16 | 78.96 | 11.90 | 49.28  | 2.83 | 1.00 | -999 |
| 16 | 78.96 | 11.90 | 43.67  | 2.65 | 0.89 | -999 |
| 16 | 79.00 | 10.17 | 32.46  | 2.25 | 0.75 | -999 |
| 16 | 79.00 | 10.17 | 35.77  | 2.54 | 0.75 | -999 |
| 16 | 79.00 | 6.99  | 5.73   | 2.03 | 0.40 | -999 |
| 16 | 79.00 | 6.99  | 5.07   | 1.53 | 0.48 | -999 |
| 16 | 78.97 | 6.71  | 6.70   | 0.60 | 0.28 | -999 |
| 16 | 78.97 | 6.71  | 5.37   | 0.57 | 0.27 | -999 |
| 16 | 78.95 | 5.29  | 2.49   | 0.56 | 0.42 | -999 |
| 16 | 78.98 | 5.29  | 1.97   | 0.36 | 0.31 | -999 |
| 16 | 78.98 | 5.29  | 2.39   | 0.57 | 0.30 | -999 |
| 16 | 78.98 | 4.91  | 2.03   | 0.39 | 0.71 | -999 |
| 16 | 78.98 | 4.91  | 3.16   | 0.56 | 0.61 | -999 |
| 16 | 79.20 | 2.95  | 2.61   | 0.60 | 0.79 | -999 |
| 16 | 79.20 | 2.95  | 2.98   | 1.06 | 0.59 | -999 |
| 16 | 79.84 | 8.05  | 1.95   | 0.64 | 0.35 | -999 |
| 16 | 79.84 | 8.05  | 2.23   | 0.60 | 0.33 | -999 |
| 16 | 80.35 | 7.72  | 1.88   | 0.47 | 0.39 | -999 |
| 16 | 79.02 | 10.58 | 1.63   | 0.49 | 0.66 | -999 |
| 16 | 79.02 | 10.58 | 14.86  | 1.07 | 0.56 | -999 |
| 16 | 79.02 | 10.69 | 19.18  | 1.24 | 0.65 | -999 |
| 16 | 78.98 | 11.77 | 278.32 | 3.31 | 1.54 | -999 |
| 16 | 78.98 | 11.77 | 282.56 | 3.62 | 1.27 | -999 |
| 16 | 78.30 | 7.64  | 43.03  | 2.73 | 0.26 | -999 |
| 16 | 78.30 | 7.64  | 37.88  | 2.35 | 0.21 | -999 |
| 16 | 77.02 | 9.28  | 6.70   | 0.52 | 0.16 | -999 |
| 16 | 77.02 | 9.28  | 6.71   | 0.51 | 0.14 | -999 |
| 16 | 75.82 | 10.91 | 3.36   | 0.62 | 0.17 | -999 |
| 16 | 75.82 | 10.91 | 1.57   | 0.45 | 0.14 | -999 |
| 16 | 73.64 | 13.84 | 1.20   | 0.49 | 0.89 | -999 |
| 16 | 73.64 | 13.84 | 1.98   | 0.37 | 0.69 | -999 |
| 16 | 73.66 | 13.78 | 4.68   | 0.57 | 0.76 | -999 |
| 16 | 73.66 | 13.78 | 4.73   | 0.48 | 0.63 | -999 |
| 16 | 71.78 | 12.40 | 2.32   | 0.69 | 0.78 | -999 |
| 16 | 71.78 | 12.40 | 2.42   | 0.45 | 0.78 | -999 |
| 16 | 70.14 | 11.23 | 4.47   | 0.62 | 0.95 | -999 |

|    |        |        |       |      |       |      |
|----|--------|--------|-------|------|-------|------|
| 16 | 63.99  | 7.34   | 5.69  | 0.60 | 0.83  | -999 |
| 17 | -53.71 | -36.80 | 18.45 | -999 | 0.78  | 6.00 |
| 17 | -53.58 | -36.86 | 16.01 | -999 | 0.91  | 6.00 |
| 17 | -53.45 | -36.93 | 31.77 | -999 | 1.34  | 6.00 |
| 17 | -53.32 | -37.00 | 46.70 | -999 | 1.70  | 6.00 |
| 17 | -53.19 | -37.06 | 51.95 | -999 | 3.13  | 6.00 |
| 17 | -53.07 | -37.11 | 28.59 | -999 | 3.07  | 6.00 |
| 17 | -52.94 | -37.17 | 27.11 | -999 | 3.55  | 6.00 |
| 17 | -52.80 | -37.10 | 24.57 | -999 | 1.94  | 6.00 |
| 17 | -52.68 | -37.20 | 25.85 | -999 | 1.56  | 6.00 |
| 17 | -52.55 | -37.30 | 28.26 | -999 | 1.48  | 6.00 |
| 17 | -52.42 | -37.43 | 25.34 | -999 | 1.44  | 6.00 |
| 17 | -52.29 | -37.47 | 28.45 | -999 | 2.09  | 6.00 |
| 17 | -52.17 | -37.55 | 18.90 | -999 | 1.57  | 6.00 |
| 17 | -52.03 | -37.61 | 15.28 | -999 | 1.56  | 6.00 |
| 17 | -51.92 | -37.67 | 14.09 | -999 | 1.35  | 6.00 |
| 17 | -51.78 | -37.73 | 28.71 | -999 | 2.48  | 6.00 |
| 17 | -51.65 | -37.80 | 34.42 | -999 | 2.44  | 6.00 |
| 17 | -53.07 | -51.03 | 10.16 | -999 | 1.44  | 6.00 |
| 17 | -53.05 | -51.17 | 8.79  | -999 | 1.08  | 6.00 |
| 17 | -52.07 | -55.63 | 13.88 | -999 | 0.63  | 6.00 |
| 17 | -51.89 | -56.50 | 7.17  | -999 | 0.96  | 6.00 |
| 17 | -52.57 | -57.90 | 15.78 | -999 | 0.93  | 6.00 |
| 17 | -52.57 | -57.90 | 12.42 | -999 | 1.09  | 6.00 |
| 17 | -52.78 | -57.96 | 11.60 | -999 | 1.73  | 6.00 |
| 17 | -52.93 | -58.01 | 11.95 | -999 | 0.80  | 6.00 |
| 17 | -53.16 | -58.08 | 9.72  | -999 | 1.02  | 6.00 |
| 17 | -53.30 | -58.12 | 8.71  | -999 | 0.72  | 6.00 |
| 17 | -55.12 | -58.26 | 9.57  | -999 | 2.02  | 6.00 |
| 17 | -55.54 | -57.95 | 9.40  | -999 | 0.91  | 6.00 |
| 17 | -55.84 | -57.78 | 8.72  | -999 | 0.46  | 6.00 |
| 17 | -55.98 | -57.72 | 8.41  | -999 | 1.11  | 6.00 |
| 17 | -56.37 | -57.49 | 5.02  | -999 | 0.62  | 6.00 |
| 17 | -56.48 | -57.43 | 4.97  | -999 | -0.01 | 6.00 |
| 17 | -57.11 | -56.97 | 5.18  | -999 | 1.31  | 6.00 |
| 17 | -57.80 | -56.60 | 11.08 | -999 | 1.23  | 6.00 |
| 17 | -57.90 | -56.54 | 16.22 | -999 | 0.42  | 6.00 |
| 17 | -58.25 | -56.31 | 6.11  | -999 | 0.68  | 6.00 |
| 17 | -58.34 | -56.25 | 6.84  | -999 | 1.25  | 6.00 |
| 17 | -58.76 | -56.02 | 10.61 | -999 | 3.33  | 6.00 |
| 17 | -59.03 | -55.84 | 15.33 | -999 | 2.24  | 6.00 |
| 17 | -59.17 | -55.75 | 12.88 | -999 | 2.92  | 6.00 |
| 17 | -59.35 | -55.64 | 9.80  | -999 | 2.08  | 6.00 |
| 17 | -59.59 | -55.49 | 14.43 | -999 | 2.94  | 6.00 |
| 17 | -59.74 | -55.40 | 9.83  | -999 | 0.62  | 6.00 |
| 17 | -59.89 | -55.31 | 9.44  | -999 | 2.76  | 6.00 |
| 17 | -62.29 | -58.10 | 27.34 | -999 | 3.21  | 6.00 |

|    |        |        |       |      |      |      |
|----|--------|--------|-------|------|------|------|
| 17 | -62.32 | -58.24 | 11.34 | -999 | 1.61 | 6.00 |
| 17 | -62.39 | -58.49 | 9.99  | -999 | 1.62 | 6.00 |
| 17 | -62.49 | -58.90 | 16.07 | -999 | 0.73 | 6.00 |
| 17 | -62.59 | -59.27 | 11.13 | -999 | 1.99 | 6.00 |
| 17 | -62.86 | -60.35 | 12.28 | -999 | 2.38 | 6.00 |
| 17 | -63.00 | -60.45 | 10.30 | -999 | 1.78 | 6.00 |
| 17 | -63.06 | -60.54 | 11.05 | -999 | 1.75 | 6.00 |
| 17 | -63.20 | -60.66 | 10.41 | -999 | 1.57 | 6.00 |
| 17 | -64.78 | -63.40 | 31.97 | -999 | 1.87 | 6.00 |
| 17 | -64.82 | -63.52 | 39.46 | -999 | 2.24 | 6.00 |
| 17 | -64.82 | -63.52 | 41.14 | -999 | 1.99 | 6.00 |
| 17 | -64.82 | -63.52 | 43.55 | -999 | 2.64 | 6.00 |
| 17 | -64.85 | -64.02 | 60.77 | -999 | 2.76 | 6.00 |
| 18 | 55.60  | 2.22   | 2.47  | -999 | -999 | -999 |
| 18 | 55.27  | 2.53   | 2.16  | -999 | -999 | -999 |
| 18 | 55.27  | 2.53   | 2.38  | -999 | -999 | -999 |
| 18 | 55.27  | 2.53   | 2.33  | -999 | -999 | 7.00 |
| 18 | 55.45  | 2.45   | 2.33  | -999 | -999 | -999 |
| 18 | 55.53  | 2.17   | 2.76  | -999 | -999 | -999 |
| 18 | 55.37  | 2.36   | 2.41  | -999 | -999 | -999 |
| 18 | 55.37  | 2.36   | 2.85  | -999 | -999 | 8.00 |
| 18 | 55.29  | 8.00   | 2.92  | -999 | -999 | -999 |
| 18 | 55.18  | 9.00   | 2.61  | -999 | -999 | -999 |
| 18 | 55.00  | 2.62   | 1.82  | -999 | -999 | -999 |
| 18 | 55.12  | 2.58   | 3.23  | -999 | -999 | -999 |
| 18 | 55.09  | 2.45   | 2.98  | -999 | -999 | -999 |
| 18 | 55.13  | 2.80   | 2.58  | -999 | -999 | 2.00 |
| 18 | 55.23  | 2.10   | 2.82  | -999 | -999 | -999 |
| 18 | 54.84  | 3.61   | 1.91  | -999 | -999 | -999 |
| 18 | 54.28  | 7.19   | 2.07  | -999 | -999 | -999 |
| 18 | 54.23  | 7.55   | 2.36  | -999 | -999 | -999 |
| 19 | 56.19  | 18.65  | 20.62 | -999 | -999 | 7.00 |
| 19 | 57.11  | 19.27  | 19.07 | -999 | -999 | 7.00 |
| 19 | 59.04  | 19.50  | 19.83 | -999 | -999 | 7.00 |
| 19 | 54.47  | 11.83  | 40.96 | -999 | -999 | 7.00 |
| 19 | 54.61  | 11.09  | 62.84 | -999 | -999 | 7.00 |
| 19 | 54.64  | 10.73  | 46.77 | -999 | -999 | 7.00 |
| 19 | 55.75  | 10.82  | 74.16 | -999 | -999 | 7.00 |
| 19 | 57.69  | 1.48   | 87.46 | -999 | -999 | 7.00 |
| 19 | 55.56  | 4.11   | 35.58 | -999 | -999 | 7.00 |
| 19 | 54.89  | 5.87   | 25.64 | -999 | -999 | 7.00 |
| 19 | 54.29  | 7.42   | 42.74 | -999 | -999 | 7.00 |
| 19 | 53.98  | 8.10   | 67.67 | -999 | -999 | 7.00 |
| 19 | 53.88  | 8.71   | 51.05 | -999 | -999 | 7.00 |
| 19 | 53.85  | 8.92   | 40.01 | -999 | -999 | 7.00 |
| 19 | 53.89  | 9.15   | 65.77 | -999 | -999 | 7.00 |
| 20 | -48.37 | 17.87  | 3.56  | 0.37 | 2.05 | 5.00 |

|    |        |       |      |      |      |      |
|----|--------|-------|------|------|------|------|
| 20 | -48.71 | 17.74 | 4.66 | 0.33 | 2.07 | 5.00 |
| 20 | -49.08 | 17.73 | 6.29 | 0.43 | 2.03 | 5.00 |
| 20 | -49.44 | 17.70 | 4.31 | 0.44 | 1.82 | 5.00 |
| 20 | -51.20 | 17.54 | 6.12 | 0.42 | 1.39 | 5.00 |
| 20 | -51.42 | 17.51 | -999 | -999 | -999 | 5.00 |
| 20 | -51.61 | 17.48 | 3.45 | 0.42 | 1.86 | 5.00 |
| 20 | -52.00 | 17.51 | 2.75 | 0.38 | 1.83 | 5.00 |
| 20 | -52.20 | 17.65 | 3.65 | 0.47 | 1.95 | 5.00 |
| 20 | -52.59 | 17.90 | 4.14 | 0.44 | 1.79 | 5.00 |
| 20 | -54.01 | 18.97 | 4.04 | 0.49 | 2.15 | 5.00 |
| 20 | -54.47 | 19.30 | 3.36 | 0.38 | 2.87 | 5.00 |
| 20 | -54.82 | 19.72 | 4.29 | 0.49 | 2.65 | 5.00 |
| 20 | -55.15 | 20.12 | 3.98 | 0.47 | 3.97 | 5.00 |
| 20 | -56.16 | 21.00 | 3.76 | 0.46 | 1.09 | 5.00 |
| 20 | -56.44 | 21.30 | 6.68 | 0.49 | 1.28 | 5.00 |
| 20 | -56.82 | 21.66 | 6.44 | 0.63 | 1.25 | 5.00 |
| 20 | -57.17 | 22.06 | 5.77 | 0.51 | 1.02 | 5.00 |
| 20 | -58.03 | 23.06 | 4.11 | 0.53 | 1.24 | 5.00 |
| 20 | -58.25 | 23.28 | 4.88 | 0.46 | 1.09 | 5.00 |
| 20 | -58.59 | 23.64 | 4.87 | 0.54 | 1.22 | 5.00 |
| 20 | -58.97 | 24.03 | 4.85 | 0.46 | 1.42 | 5.00 |
| 20 | -59.33 | 24.50 | 5.12 | 0.47 | 1.18 | 5.00 |
| 20 | -59.67 | 24.95 | 4.50 | 0.50 | 1.16 | 5.00 |
| 20 | -60.52 | 26.09 | 5.97 | 0.49 | 1.14 | 5.00 |
| 20 | -60.88 | 26.30 | 4.08 | 0.44 | 1.87 | 5.00 |
| 20 | -61.39 | 27.13 | 4.78 | 0.35 | 1.40 | 5.00 |
| 20 | -61.60 | 27.49 | 5.30 | 0.35 | 1.00 | 5.00 |
| 20 | -61.94 | 27.98 | 5.20 | 0.35 | 1.26 | 5.00 |
| 20 | -62.50 | 28.86 | 4.55 | 0.29 | 1.76 | 5.00 |
| 20 | -62.75 | 29.44 | 4.47 | 0.25 | 1.82 | 5.00 |
| 20 | -63.07 | 29.97 | 4.31 | 0.22 | 2.22 | 5.00 |
| 20 | -63.52 | 30.66 | 4.98 | 0.41 | 1.98 | 5.00 |
| 20 | -63.79 | 31.15 | 4.81 | 0.42 | 1.86 | 5.00 |
| 20 | -64.45 | 32.87 | 4.01 | 0.55 | 1.68 | 5.00 |
| 20 | -64.39 | 34.26 | 4.27 | 0.55 | 2.18 | 5.00 |
| 20 | -64.32 | 35.84 | 4.55 | 0.57 | 2.51 | 5.00 |
| 20 | -64.31 | 37.03 | 4.70 | 0.57 | 2.21 | 5.00 |
| 20 | -64.25 | 37.94 | -999 | -999 | -999 | 5.00 |
| 20 | -64.13 | 40.41 | -999 | -999 | -999 | 5.00 |
| 20 | -64.10 | 41.90 | 4.27 | 0.52 | 1.65 | 5.00 |
| 20 | -64.02 | 42.62 | 4.11 | 0.58 | 1.90 | 5.00 |
| 20 | -63.94 | 44.59 | 4.39 | 0.55 | 1.71 | 5.00 |
| 20 | -63.91 | 45.32 | 3.71 | 0.57 | 1.63 | 5.00 |
| 20 | -63.80 | 48.00 | 4.73 | 0.50 | 1.15 | 5.00 |
| 20 | -63.74 | 49.81 | 5.73 | 0.66 | 1.86 | 5.00 |
| 20 | -63.63 | 51.31 | 4.80 | 0.58 | 1.57 | 5.00 |
| 20 | -63.59 | 52.73 | 4.58 | 0.52 | 1.26 | 5.00 |



|    |        |       |       |      |      |      |
|----|--------|-------|-------|------|------|------|
| 20 | -63.79 | 53.91 | 4.78  | 0.58 | 1.35 | 5.00 |
| 20 | -64.19 | 55.85 | 4.64  | 0.51 | 1.22 | 5.00 |
| 20 | -64.67 | 58.16 | -999  | -999 | -999 | 5.00 |
| 20 | -64.52 | 59.94 | -999  | -999 | -999 | 5.00 |
| 20 | -64.35 | 61.36 | -999  | -999 | -999 | 5.00 |
| 20 | -64.33 | 61.77 | -999  | -999 | -999 | 5.00 |
| 20 | -64.27 | 63.44 | -999  | -999 | -999 | 5.00 |
| 20 | -64.06 | 65.30 | -999  | -999 | -999 | 5.00 |
| 20 | -63.86 | 66.93 | -999  | -999 | -999 | 5.00 |
| 20 | -63.65 | 68.79 | -999  | -999 | -999 | 5.00 |
| 20 | -63.49 | 70.63 | 8.76  | 0.79 | -999 | 5.00 |
| 20 | -63.35 | 72.31 | 8.33  | 0.81 | 1.22 | 5.00 |
| 20 | -63.18 | 73.86 | 8.37  | 0.91 | 1.73 | 5.00 |
| 20 | -63.00 | 75.73 | 8.70  | 0.95 | 1.75 | 5.00 |
| 20 | -62.81 | 77.40 | 12.18 | 1.01 | 1.80 | 5.00 |
| 20 | -62.17 | 83.26 | 12.04 | 0.88 | 1.85 | 5.00 |
| 20 | -62.62 | 83.44 | 11.75 | 1.02 | 2.02 | 5.00 |
| 20 | -63.06 | 83.72 | 9.47  | 1.02 | 1.60 | 5.00 |
| 20 | -63.67 | 84.10 | 14.94 | 0.87 | 4.40 | 5.00 |
| 20 | -63.99 | 84.39 | 4.95  | 0.31 | 1.86 | 5.00 |
| 20 | -64.17 | 84.57 | -999  | 0.83 | 1.66 | 5.00 |
| 20 | -65.09 | 85.32 | -999  | -999 | -999 | 5.00 |
| 20 | -59.15 | 78.93 | 10.18 | 0.98 | 1.30 | 5.00 |
| 20 | -58.63 | 78.38 | 7.39  | 0.54 | 1.35 | 5.00 |
| 20 | -56.68 | 76.37 | -999  | 1.02 | 1.59 | 5.00 |
| 20 | -56.08 | 75.75 | 14.91 | 1.15 | 2.20 | 5.00 |
| 20 | -55.52 | 75.21 | 25.83 | 1.63 | 4.08 | 5.00 |
| 20 | -55.25 | 75.05 | 17.63 | 1.37 | 2.24 | 5.00 |
| 20 | -54.46 | 74.29 | 27.78 | 1.51 | 5.37 | 5.00 |
| 20 | -53.50 | 73.37 | 18.58 | 1.26 | 2.18 | 5.00 |
| 20 | -53.03 | 72.42 | 13.73 | 1.15 | 2.07 | 5.00 |
| 20 | -52.69 | 71.68 | 16.77 | 1.24 | 2.81 | 5.00 |
| 20 | -52.06 | 69.83 | 15.67 | 1.09 | 1.85 | 5.00 |
| 20 | -51.55 | 68.75 | 15.06 | 0.76 | 1.63 | 5.00 |
| 20 | -51.23 | 67.89 | 18.35 | 0.86 | 2.19 | 5.00 |
| 20 | -50.73 | 66.63 | 17.82 | 1.17 | 2.35 | 5.00 |
| 20 | -50.30 | 65.58 | 24.75 | 1.35 | 2.75 | 5.00 |
| 20 | -49.95 | 64.61 | 17.18 | 0.59 | 3.06 | 5.00 |
| 20 | -49.59 | 63.75 | 19.03 | 0.65 | 3.20 | 5.00 |
| 20 | -49.25 | 62.90 | 30.67 | 1.05 | 3.97 | 5.00 |
| 20 | -48.58 | 61.34 | -999  | -999 | -999 | 5.00 |
| 20 | -48.47 | 60.97 | 17.07 | 1.09 | 3.70 | 5.00 |
| 20 | -48.33 | 60.20 | 16.46 | 0.50 | 3.77 | 5.00 |
| 20 | -47.99 | 58.44 | 11.60 | 0.23 | 4.43 | 5.00 |
| 20 | -47.70 | 57.00 | 12.82 | 0.23 | 8.53 | 5.00 |
| 20 | -47.64 | 56.86 | 15.52 | 1.00 | 5.18 | 5.00 |
| 20 | -47.41 | 55.41 | -999  | -999 | -999 | 5.00 |

|       |        |        |       |      |       |      |
|-------|--------|--------|-------|------|-------|------|
| 20    | -47.01 | 54.04  | 8.63  | 0.74 | 4.50  | 5.00 |
| 20    | -46.86 | 53.50  | 9.21  | 0.95 | 4.23  | 5.00 |
| 20    | -46.85 | 53.35  | -999  | -999 | -999  | 5.00 |
| 20    | -46.14 | 49.41  | 8.88  | 0.78 | 5.88  | 5.00 |
| 20    | -46.07 | 49.27  | -999  | -999 | -999  | 5.00 |
| 20    | -45.63 | 48.39  | 8.24  | 0.83 | 4.95  | 5.00 |
| 20    | -45.00 | 46.69  | -999  | -999 | -999  | 5.00 |
| 20    | -44.65 | 45.76  | 10.42 | 0.79 | 7.88  | 5.00 |
| 20    | -44.27 | 44.38  | 6.74  | 0.50 | 8.71  | 5.00 |
| 20    | -44.01 | 43.59  | 6.67  | 0.46 | 8.31  | 5.00 |
| 20    | -43.54 | 42.59  | 8.47  | 0.57 | 8.97  | 5.00 |
| 20    | -43.14 | 41.58  | 6.36  | 0.37 | 7.15  | 5.00 |
| 20    | -42.85 | 40.65  | 7.19  | 0.41 | 14.18 | 5.00 |
| 20    | -42.32 | 38.87  | 7.49  | 0.37 | 14.88 | 5.00 |
| 20    | -41.94 | 38.00  | 5.04  | 0.16 | 14.67 | 5.00 |
| 20    | -41.61 | 37.25  | 5.99  | 0.36 | 13.64 | 5.00 |
| 20    | -41.23 | 36.37  | 6.58  | 0.53 | 12.80 | 5.00 |
| 20    | -40.89 | 35.27  | 3.07  | 0.43 | 18.68 | 5.00 |
| <hr/> |        |        |       |      |       |      |
| 21    | 42.54  | -50.54 | -999  | 2.46 | -999  | 5.00 |
| 21    | 42.12  | -51.29 | -999  | -999 | -999  | 5.00 |
| 21    | 41.20  | -52.11 | -999  | -999 | -999  | 5.00 |
| 21    | 41.20  | -52.11 | -999  | -999 | -999  | 5.00 |
| 21    | 39.53  | -52.22 | -999  | -999 | -999  | 5.00 |
| 21    | 39.53  | -52.22 | -999  | -999 | -999  | 5.00 |
| 21    | 38.36  | -52.21 | -999  | -999 | -999  | 5.00 |
| 21    | 36.55  | -52.21 | -999  | -999 | -999  | 5.00 |
| 21    | 36.55  | -52.21 | -999  | -999 | -999  | 5.00 |
| 21    | 34.13  | -52.21 | -999  | -999 | -999  | 5.00 |
| 21    | 34.13  | -52.21 | -999  | -999 | -999  | 5.00 |
| 21    | 32.12  | -52.21 | -999  | -999 | -999  | 5.00 |
| 21    | 32.12  | -52.21 | -999  | -999 | -999  | 5.00 |
| 21    | 29.32  | -52.21 | -999  | -999 | -999  | 0.00 |
| 21    | 29.32  | -52.21 | -999  | -999 | -999  | 0.00 |
| 21    | 29.32  | -52.21 | -999  | -999 | -999  | 0.00 |
| 21    | 29.32  | -52.21 | -999  | -999 | -999  | 5.00 |
| 21    | 29.32  | -52.21 | -999  | -999 | -999  | 5.00 |
| 21    | 27.32  | -52.21 | -999  | -999 | -999  | 5.00 |
| 21    | 27.32  | -52.21 | -999  | -999 | -999  | 5.00 |
| 21    | 25.31  | -52.21 | -999  | -999 | -999  | 5.00 |
| 21    | 25.31  | -52.21 | -999  | -999 | -999  | 5.00 |
| 21    | 23.31  | -52.21 | -999  | -999 | -999  | 5.00 |
| 21    | 23.31  | -52.21 | -999  | -999 | -999  | 5.00 |
| 21    | 23.31  | -52.21 | -999  | -999 | -999  | 5.00 |
| 21    | 23.31  | -52.21 | -999  | -999 | -999  | 5.00 |
| 21    | 20.50  | -52.20 | -999  | -999 | -999  | 5.00 |
| 21    | 20.50  | -52.20 | -999  | -999 | -999  | 5.00 |
| 21    | 18.50  | -52.20 | -999  | -999 | -999  | 5.00 |

|    |       |        |      |      |       |       |
|----|-------|--------|------|------|-------|-------|
| 21 | 18.50 | -52.20 | -999 | -999 | -999  | 5.00  |
| 21 | 13.34 | -52.20 | -999 | -999 | -999  | 5.00  |
| 21 | 13.34 | -52.20 | -999 | -999 | -999  | 5.00  |
| 21 | 11.31 | -52.20 | -999 | -999 | -999  | 5.00  |
| 21 | 11.31 | -52.20 | -999 | -999 | -999  | 5.00  |
| 21 | 9.38  | -52.21 | -999 | -999 | -999  | 5.00  |
| 21 | 9.38  | -52.21 | -999 | -999 | -999  | 5.00  |
| 21 | 8.38  | -52.44 | -999 | -999 | -999  | 0.00  |
| 21 | 8.38  | -52.44 | -999 | -999 | -999  | 0.00  |
| 21 | 8.38  | -52.44 | -999 | -999 | -999  | 5.00  |
| 21 | 7.42  | -53.12 | -999 | 1.47 | -999  | 2.00  |
| 21 | 7.42  | -53.12 | -999 | 1.47 | -999  | 2.00  |
| 21 | 7.42  | -53.12 | -999 | 0.91 | -999  | 10.00 |
| 22 | 42.03 | -14.85 | -999 | -999 | 10.73 | 4.00  |
| 22 | 42.03 | -14.85 | -999 | -999 | 10.69 | 10.00 |
| 22 | 44.77 | -19.37 | -999 | -999 | 5.74  | 5.00  |
| 22 | 44.77 | -19.37 | -999 | -999 | 5.85  | 5.00  |
| 22 | 44.77 | -19.37 | -999 | -999 | 6.02  | 10.00 |
| 22 | 46.10 | -21.55 | -999 | -999 | -999  | 0.00  |
| 22 | 46.10 | -21.55 | -999 | -999 | -999  | 4.00  |
| 22 | 46.10 | -21.55 | -999 | -999 | -999  | 4.00  |
| 22 | 46.10 | -21.55 | -999 | -999 | -999  | 10.00 |
| 22 | 46.10 | -21.55 | -999 | 1.85 | 7.51  | 0.00  |
| 22 | 46.10 | -21.55 | -999 | 1.91 | 7.60  | 4.00  |
| 22 | 46.10 | -21.55 | -999 | 1.98 | 7.69  | 4.00  |
| 22 | 46.10 | -21.55 | -999 | 1.95 | 7.72  | 10.00 |
| 22 | 46.05 | -21.55 | -999 | 1.38 | 13.27 | 4.00  |
| 22 | 46.05 | -21.55 | -999 | 1.17 | 13.52 | 4.00  |
| 22 | 46.05 | -21.55 | -999 | 1.17 | 12.96 | 10.00 |
| 22 | 46.14 | -21.52 | -999 | 1.44 | 9.99  | 0.00  |
| 22 | 46.14 | -21.52 | -999 | 1.35 | 9.37  | 0.00  |
| 22 | 46.14 | -21.52 | -999 | 1.47 | 9.71  | 4.00  |
| 22 | 46.14 | -21.52 | -999 | 1.42 | 9.89  | 4.00  |
| 22 | 46.14 | -21.52 | -999 | 1.46 | 9.97  | 10.00 |
| 22 | 46.23 | -21.45 | -999 | -999 | 9.44  | 0.00  |
| 22 | 46.23 | -21.45 | -999 | -999 | 9.56  | 5.00  |
| 22 | 46.23 | -21.45 | -999 | -999 | 9.78  | 7.00  |
| 22 | 46.23 | -21.45 | -999 | -999 | 9.71  | 10.00 |
| 22 | 46.26 | -21.35 | -999 | 1.49 | 9.45  | 0.00  |
| 22 | 46.26 | -21.35 | -999 | 2.04 | 9.43  | 0.00  |
| 22 | 46.26 | -21.35 | -999 | 1.47 | 9.67  | 5.00  |
| 22 | 46.26 | -21.35 | -999 | 1.51 | 9.87  | 10.00 |
| 22 | 46.29 | -21.07 | -999 | 1.39 | 10.12 | 0.00  |
| 22 | 46.29 | -21.07 | -999 | 1.52 | 10.26 | 0.00  |
| 22 | 46.29 | -21.07 | -999 | 1.43 | 10.44 | 5.00  |
| 22 | 46.29 | -21.07 | -999 | 1.51 | 10.09 | 5.00  |
| 22 | 46.29 | -21.07 | -999 | 1.55 | 10.57 | 10.00 |

|    |       |        |      |      |       |       |
|----|-------|--------|------|------|-------|-------|
| 22 | 46.21 | -20.89 | -999 | 1.47 | 9.11  | 0.00  |
| 22 | 46.21 | -20.89 | -999 | 1.52 | 9.24  | 0.00  |
| 22 | 46.21 | -20.89 | -999 | 1.66 | 9.73  | 5.00  |
| 22 | 46.21 | -20.89 | -999 | 1.74 | 9.39  | 5.00  |
| 22 | 46.21 | -20.89 | -999 | 1.54 | 9.46  | 10.00 |
| 22 | 999   | 999    | -999 | 1.26 | 11.14 | 0.00  |
| 22 | 999   | 999    | -999 | 1.39 | 11.31 | 0.00  |
| 22 | 999   | 999    | -999 | 2.00 | 11.33 | 5.00  |
| 22 | 999   | 999    | -999 | 1.39 | 11.61 | 10.00 |
| 22 | 46.00 | -21.00 | -999 | 1.54 | 10.08 | 0.00  |
| 22 | 46.00 | -21.00 | -999 | 1.55 | 9.49  | 0.00  |
| 22 | 46.00 | -21.00 | -999 | 1.60 | 9.52  | 5.00  |
| 22 | 46.00 | -21.00 | -999 | 1.60 | 9.97  | 10.00 |
| 22 | 46.01 | -21.01 | -999 | 1.56 | 9.47  | 0.00  |
| 22 | 46.01 | -21.01 | -999 | 1.57 | 9.18  | 0.00  |
| 22 | 46.01 | -21.01 | -999 | 1.54 | 9.65  | 5.00  |
| 22 | 46.01 | -21.01 | -999 | 2.26 | 9.62  | 5.00  |
| 22 | 46.01 | -21.01 | -999 | 1.72 | 10.11 | 10.00 |
| 22 | 46.00 | -21.06 | -999 | 0.60 | 8.90  | 0.00  |
| 22 | 46.00 | -21.06 | -999 | 0.64 | 9.04  | 0.00  |
| 22 | 46.00 | -21.06 | -999 | 0.67 | 9.40  | 5.00  |
| 22 | 46.11 | -20.99 | -999 | 1.44 | 7.20  | 0.00  |
| 22 | 46.11 | -20.99 | -999 | 1.52 | 7.59  | 0.00  |
| 22 | 46.11 | -20.99 | -999 | 1.57 | 7.92  | 6.00  |
| 22 | 46.11 | -20.99 | -999 | 1.58 | 7.81  | 10.00 |
| 22 | 46.06 | -20.98 | -999 | 1.41 | 7.43  | 0.00  |
| 22 | 46.06 | -20.98 | -999 | 1.50 | 7.67  | 0.00  |
| 22 | 46.06 | -20.98 | -999 | 1.54 | 7.69  | 6.00  |
| 22 | 46.06 | -20.98 | -999 | 1.51 | 7.73  | 10.00 |
| 22 | 46.23 | -21.04 | -999 | 1.37 | 8.49  | 0.00  |
| 22 | 46.23 | -21.04 | -999 | 1.38 | 8.53  | 0.00  |
| 22 | 46.23 | -21.04 | -999 | 1.36 | 8.88  | 5.00  |
| 22 | 46.23 | -21.04 | -999 | 1.37 | 9.01  | 10.00 |
| 22 | 46.16 | -20.41 | -999 | -999 | 10.27 | 0.00  |
| 22 | 46.16 | -20.41 | -999 | -999 | 11.15 | 5.00  |
| 22 | 46.16 | -20.41 | -999 | -999 | 10.95 | 10.00 |
| 22 | 46.12 | -20.44 | -999 | -999 | 9.54  | 5.00  |
| 22 | 46.12 | -20.44 | -999 | -999 | 9.47  | 10.00 |
| 22 | 46.04 | -20.69 | -999 | 1.39 | 20.62 | 0.00  |
| 22 | 46.04 | -20.69 | -999 | 1.51 | 20.60 | 0.00  |
| 22 | 46.04 | -20.69 | -999 | 1.49 | 21.80 | 5.00  |
| 22 | 46.04 | -20.69 | -999 | 1.57 | 22.09 | 10.00 |
| 23 | 42.32 | -61.23 | -999 | 5.88 | -999  | 0.00  |
| 23 | 42.32 | -61.23 | -999 | 5.77 | -999  | 10.00 |
| 23 | 44.49 | -60.28 | -999 | -999 | 0.43  | 0.00  |
| 23 | 44.49 | -60.28 | -999 | -999 | 0.47  | 10.00 |
| 23 | 49.51 | -58.27 | -999 | -999 | -999  | 0.00  |

|    |       |        |       |      |       |       |
|----|-------|--------|-------|------|-------|-------|
| 23 | 49.51 | -58.27 | -999  | -999 | -999  | 0.00  |
| 23 | 49.51 | -58.27 | -999  | -999 | -999  | 10.00 |
| 23 | 54.30 | -54.46 | -999  | -999 | -999  | 2.00  |
| 23 | 54.30 | -54.46 | -999  | -999 | -999  | 2.00  |
| 23 | 54.30 | -54.46 | -999  | -999 | -999  | 2.00  |
| 23 | 54.30 | -54.46 | -999  | -999 | -999  | 10.00 |
| 23 | 54.13 | -55.01 | -999  | -999 | -999  | 10.00 |
| 23 | 54.13 | -55.01 | -999  | -999 | -999  | 10.00 |
| 23 | 55.25 | -53.49 | -999  | 6.42 | -999  | 2.00  |
| 23 | 56.32 | -52.42 | -999  | 5.17 | -999  | 2.00  |
| 23 | 60.34 | -48.15 | -999  | -999 | -999  | 2.00  |
| 23 | 59.04 | -49.57 | -999  | 6.10 | -999  | 2.00  |
| 23 | 56.07 | -53.07 | -999  | 3.66 | -999  | 2.00  |
| 23 | 56.07 | -53.07 | -999  | 3.74 | -999  | 10.00 |
| 24 | 54.14 | 11.84  | 8.86  | 8.92 | 1.41  | 3.00  |
| 24 | 54.14 | 11.84  | 6.31  | 5.43 | 0.92  | 3.00  |
| 24 | 54.14 | 11.84  | 6.36  | 5.42 | -999  | 3.00  |
| 24 | 54.14 | 11.84  | 8.71  | 5.96 | 1.20  | 3.00  |
| 24 | 54.14 | 11.84  | 13.26 | 6.47 | 1.09  | 3.00  |
| 24 | 54.14 | 11.84  | 9.27  | 5.20 | 1.17  | 3.00  |
| 24 | 54.14 | 11.84  | 9.90  | 4.64 | -999  | 3.00  |
| 24 | 54.14 | 11.84  | 12.52 | 9.15 | 3.52  | 3.00  |
| 24 | 54.14 | 11.84  | 12.77 | 6.24 | 1.27  | 3.00  |
| 24 | 54.14 | 11.84  | 8.39  | 8.22 | 1.72  | 3.00  |
| 24 | 54.14 | 11.84  | 5.61  | 4.33 | 1.74  | 3.00  |
| 24 | 54.14 | 11.84  | 12.50 | 3.29 | 1.29  | 3.00  |
| 24 | 54.14 | 11.84  | 30.96 | 3.91 | 1.88  | 3.00  |
| 24 | 54.14 | 11.84  | 11.23 | 3.44 | 1.34  | 3.00  |
| 24 | 54.14 | 11.84  | 5.96  | 2.17 | 1.30  | 3.00  |
| 24 | 54.14 | 11.84  | 23.04 | 5.82 | 2.28  | 3.00  |
| 24 | 54.14 | 11.84  | 13.37 | 5.68 | 1.80  | 3.00  |
| 24 | 54.14 | 11.84  | 21.40 | 8.01 | 1.57  | 3.00  |
| 24 | 54.14 | 11.84  | 32.22 | 5.55 | 2.11  | 3.00  |
| 24 | 54.14 | 11.84  | 13.97 | 6.99 | 4.46  | 3.00  |
| 24 | 54.14 | 11.84  | 13.98 | 4.76 | 4.09  | 3.00  |
| 24 | 54.14 | 11.84  | 16.42 | 5.48 | 3.51  | 3.00  |
| 24 | 54.14 | 11.84  | 10.69 | 2.16 | 4.10  | 3.00  |
| 24 | 54.14 | 11.84  | 33.83 | 4.67 | 3.63  | 3.00  |
| 24 | 54.14 | 11.84  | 14.71 | 4.44 | 7.51  | 3.00  |
| 24 | 54.14 | 11.84  | 26.24 | 3.21 | 6.16  | 3.00  |
| 24 | 54.14 | 11.84  | 28.48 | 4.08 | 4.96  | 3.00  |
| 24 | 54.14 | 11.84  | 40.65 | 6.91 | 15.28 | 3.00  |
| 24 | 54.14 | 11.84  | -999  | -999 | -999  | 3.00  |
| 24 | 54.14 | 11.84  | 19.00 | 3.50 | 2.83  | 3.00  |
| 24 | 54.14 | 11.84  | 25.15 | 5.17 | 5.57  | 3.00  |
| 24 | 54.14 | 11.84  | 19.65 | 5.39 | 4.69  | 3.00  |
| 24 | 54.14 | 11.84  | 11.56 | 3.97 | 5.02  | 3.00  |

|    |       |        |       |         |      |         |
|----|-------|--------|-------|---------|------|---------|
| 24 | 54.14 | 11.84  | 8.42  | 2.15    | 4.02 | 3.00    |
| 24 | 54.14 | 11.84  | 17.02 | 6.86    | 7.42 | 3.00    |
| 24 | 54.14 | 11.84  | 28.33 | 6.85    | 5.25 | 3.00    |
| 24 | 54.14 | 11.84  | 11.36 | 3.43    | 4.39 | 3.00    |
| 24 | 54.14 | 11.84  | 10.81 | 3.68    | 3.87 | 3.00    |
| 24 | 54.14 | 11.84  | 26.39 | 5.80    | 7.50 | 3.00    |
| 24 | 54.14 | 11.84  | 10.19 | 4.03    | 2.27 | 3.00    |
| 24 | 54.14 | 11.84  | 13.42 | 3.74    | 2.86 | 3.00    |
| 24 | 54.14 | 11.84  | 11.28 | 3.71    | 4.83 | 3.00    |
| 24 | 54.14 | 11.84  | 6.79  | 2.33    | 1.47 | 3.00    |
| 25 | 10.55 | -53.73 | 0.00  | -999    | -999 | 6.00    |
| 25 | 10.00 | -51.41 | 5.25  | -999    | -999 | 5.00    |
| 25 | 10.00 | -48.06 | 2.59  | 0.21    | -999 | 5.00    |
| 25 | 10.00 | -44.93 | 2.34  | 1.43    | -999 | 6.00    |
| 25 | 10.00 | -41.73 | 6.16  | 0.87    | -999 | 5.00    |
| 25 | 10.00 | -39.00 | 5.97  | 2.33    | -999 | 10.00   |
| 25 | 10.00 | -36.23 | 3.23  | 1.60    | -999 | 7.00    |
| 25 | 0.00  | -26.00 | 12.75 | 5.25    | -999 | 7.00    |
| 25 | 0.00  | -23.50 | 8.47  | 3.36    | -999 | 8.00    |
| 25 | 0.00  | -23.50 | 8.27  | 2.72    | -999 | 7.00    |
| 25 | 0.00  | -23.50 | 8.36  | 3.74    | -999 | 10.00   |
| 25 | 1.95  | -23.50 | 2.50  | 1.91    | -999 | 7.00    |
| 25 | 5.29  | -24.03 | 4.26  | 1.23    | -999 | 7.00    |
| 25 | 8.22  | -24.57 | 10.07 | 4.12    | -999 | 7.00    |
| 25 | 8.22  | -24.57 | 5.79  | 0.63    | -999 | 7.00    |
| 25 | 10.50 | -25.00 | 4.45  | -999.00 | -999 | 8.00    |
| 25 | 11.00 | -23.52 | 4.24  | 3.23    | -999 | -999.00 |
| 25 | 11.00 | -23.52 | 4.25  | 2.24    | -999 | 6.00    |
| 25 | 11.00 | -20.33 | 3.71  | 0.20    | -999 | 6.00    |
| 25 | 11.50 | -18.73 | 5.88  | 1.66    | -999 | 7.00    |
| 25 | 11.65 | -17.50 | 6.26  | 4.35    | -999 | 7.00    |
| 25 | 10.42 | -16.83 | 5.14  | 1.18    | -999 | 6.00    |
| 25 | 11.03 | -17.70 | 4.31  | 1.32    | -999 | 9.00    |
| 25 | 11.00 | -18.83 | 5.04  | 2.73    | -999 | 7.00    |
| 26 | 28.20 | -53.81 | -999  | 1.28    | -999 | 5.41    |
| 26 | 32.93 | -50.13 | 2.25  | 0.55    | 3    | 4.81    |
| 26 | 37.62 | -45.38 | -999  | 1.58    | -999 | 9.75    |
| 26 | 39.00 | -44.00 | -999  | 1.64    | -999 | 6.31    |
| 26 | 42.00 | -42.00 | -999  | 1.55    | -999 | 9.84    |
| 26 | 42.00 | -42.00 | 1.62  | 1.36    | 0.88 | 4.85    |
| 26 | 33.96 | -30.63 | 2.22  | 1.52    | 2.02 | 9.93    |
| 26 | 32.58 | -28.59 | 2.10  | 1.57    | 3.30 | 4.35    |
| 26 | 31.96 | -26.23 | 2.24  | 1.48    | 5.54 | 9.08    |
| 26 | 35.53 | -23.98 | 1.86  | 1.52    | 2.25 | 5.67    |
| 26 | 38.00 | -20.00 | 3.28  | 2.25    | 7.67 | 9.87    |
| 26 | 40.70 | -42.88 | 2.25  | 1.60    | 1.71 | 5.00    |
| 26 | 41.83 | -42.12 | 1.98  | 1.73    | -999 | 5.00    |

|    |       |        |       |      |      |      |
|----|-------|--------|-------|------|------|------|
| 26 | 41.94 | -42.00 | 1.92  | 1.88 | -999 | 5.00 |
| 26 | 40.20 | -42.68 | 1.26  | 1.33 | 1.26 | 5.00 |
| 26 | 39.18 | -43.05 | 1.44  | 1.29 | 1.65 | 5.00 |
| 26 | 38.28 | -43.38 | 1.60  | 1.35 | 4.06 | 5.00 |
| 26 | 36.54 | -44.00 | 3.00  | 1.44 | 1.60 | 5.00 |
| 26 | 35.66 | -44.31 | 1.58  | 1.06 | 0.35 | 5.00 |
| 26 | 34.71 | -44.64 | 1.84  | 1.36 | -999 | 5.00 |
| 26 | 32.90 | -45.25 | 2.57  | 1.39 | 5.52 | 5.00 |
| 26 | 32.37 | -44.62 | 1.57  | 1.26 | 4.38 | 5.00 |
| 26 | 32.69 | -43.13 | 1.52  | 1.13 | 3.34 | 5.00 |
| 26 | 33.03 | -41.28 | 2.14  | 1.26 | 4.03 | 5.00 |
| 26 | 33.19 | -39.84 | 1.48  | 1.35 | 3.18 | 5.00 |
| 26 | 33.31 | -38.72 | 1.72  | 1.51 | 3.46 | 5.00 |
| 26 | 33.54 | -35.82 | 2.34  | 1.55 | 2.41 | 5.00 |
| 26 | 33.53 | -35.44 | 2.26  | 1.53 | 2.57 | 5.00 |
| 26 | 33.43 | -34.43 | 2.46  | 1.65 | 2.51 | 5.00 |
| 26 | 33.71 | -32.33 | 2.04  | 1.63 | 1.79 | 5.00 |
| 26 | 33.85 | -31.67 | 2.13  | 1.49 | 1.65 | 5.00 |
| 26 | 33.59 | -29.74 | 2.72  | 1.82 | 3.34 | 5.00 |
| 26 | 32.78 | -28.80 | 1.89  | 1.54 | 2.99 | 5.00 |
| 26 | 31.10 | -27.03 | 1.67  | 1.64 | 2.80 | 5.00 |
| 26 | 30.82 | -26.75 | 1.63  | 1.51 | 2.47 | 5.00 |
| 26 | 32.77 | -25.74 | 2.23  | 1.36 | 3.28 | 5.00 |
| 26 | 33.76 | -25.13 | 2.48  | 1.77 | 4.11 | 5.00 |
| 26 | 35.33 | -23.76 | 2.21  | 1.67 | 2.55 | 5.00 |
| 26 | 35.94 | -24.34 | 1.63  | 1.53 | 2.35 | 5.00 |
| 26 | 37.62 | -22.52 | 2.33  | 1.97 | 8.53 | 5.00 |
| 26 | 37.78 | -21.42 | 1.55  | 1.81 | 0.78 | 5.00 |
| 26 | 37.93 | -20.45 | 1.81  | 1.80 | 3.61 | 5.00 |
| 26 | 37.94 | -18.89 | 1.62  | 2.02 | 1.22 | 5.00 |
| 26 | 37.88 | -17.61 | 2.59  | 2.17 | 7.81 | 5.00 |
| 26 | 37.74 | -15.28 | 2.81  | 1.84 | 4.40 | 5.00 |
| 26 | 37.65 | -14.25 | 3.70  | 2.33 | 2.63 | 5.00 |
| 26 | 37.59 | -13.48 | 4.53  | 2.38 | 4.86 | 5.00 |
| 26 | 37.61 | -11.83 | 5.82  | 2.94 | 9.30 | 5.00 |
| 27 | 20.00 | -18.00 | 23.84 | 3.50 | -999 | 3.57 |
| 27 | 20.50 | -17.22 | 10.34 | 5.21 | -999 | 6.87 |
| 27 | 20.50 | -17.22 | 12.63 | 6.00 | -999 | 6.73 |
| 27 | 20.00 | -17.22 | 12.08 | 3.54 | -999 | 6.93 |
| 27 | 20.00 | -17.22 | 12.12 | 4.65 | -999 | 7.41 |
| 27 | 19.82 | -17.50 | 12.95 | 3.92 | -999 | 3.19 |
| 27 | 19.50 | -18.00 | 6.24  | 3.14 | -999 | 3.60 |
| 27 | 19.50 | -16.84 | 5.22  | 4.42 | -999 | 6.64 |
| 27 | 19.50 | -16.84 | 7.63  | 6.77 | -999 | 4.83 |
| 27 | 17.00 | -18.00 | 14.89 | 4.11 | -999 | 4.52 |
| 27 | 17.00 | -17.50 | 14.16 | 6.30 | -999 | 2.96 |
| 27 | 17.00 | -17.00 | 11.09 | 6.18 | -999 | 3.43 |

|       |       |        |       |      |      |      |
|-------|-------|--------|-------|------|------|------|
| 27    | 17.00 | -16.60 | 7.54  | 5.53 | -999 | 9.08 |
| 27    | 17.50 | -16.50 | 5.18  | 4.09 | -999 | 1.34 |
| 27    | 17.50 | -17.00 | 1.26  | 7.87 | -999 | 6.42 |
| 27    | 18.00 | -17.50 | 16.62 | 6.05 | -999 | 4.36 |
| 27    | 18.00 | -17.01 | 14.65 | 4.87 | -999 | 3.68 |
| 27    | 18.00 | -16.50 | 9.32  | 5.81 | -999 | 9.83 |
| 27    | 18.50 | -16.50 | 8.80  | 5.19 | -999 | 3.60 |
| 27    | 19.00 | -18.00 | 9.79  | 0.00 | -999 | 3.54 |
| 27    | 18.00 | -19.00 | 1.97  | 0.55 | -999 | 6.00 |
| 27    | 18.00 | -18.50 | 9.97  | 3.22 | -999 | 5.34 |
| 27    | 20.00 | -18.00 | 23.84 | 3.50 | -999 | 4.00 |
| 27    | 20.00 | -18.00 | 23.84 | 3.50 | -999 | 4.00 |
| 27    | 20.08 | -17.88 | 16.37 | 7.06 | -999 | 4.00 |
| 27    | 20.50 | -17.22 | 12.62 | 6.00 | -999 | 4.00 |
| 27    | 20.33 | -17.22 | 15.47 | 5.95 | -999 | 4.00 |
| 27    | 20.00 | -17.22 | 12.08 | 3.54 | -999 | 4.00 |
| 27    | 19.99 | -17.15 | 13.72 | 4.19 | -999 | 4.00 |
| 27    | 19.82 | -17.50 | 12.95 | 3.92 | -999 | 4.00 |
| 27    | 19.81 | -17.50 | 30.28 | 3.47 | -999 | 4.00 |
| 27    | 19.50 | -18.00 | 6.24  | 3.14 | -999 | 4.00 |
| 27    | 19.50 | -17.68 | 32.74 | 3.92 | -999 | 4.00 |
| 27    | 19.50 | -17.25 | 3.92  | 3.43 | -999 | 4.00 |
| 27    | 19.50 | -16.84 | 7.63  | 6.77 | -999 | 4.00 |
| 27    | 17.00 | -18.00 | 14.89 | 4.11 | -999 | 4.00 |
| 27    | 17.00 | -17.50 | 14.16 | 6.29 | -999 | 4.00 |
| 27    | 17.01 | -16.99 | 11.09 | 6.18 | -999 | 4.00 |
| 27    | 17.00 | -16.83 | 7.47  | 6.26 | -999 | 4.00 |
| 27    | 17.52 | -16.43 | 6.40  | 4.67 | -999 | 4.00 |
| 27    | 17.50 | -16.50 | 5.18  | 4.09 | -999 | 4.00 |
| 27    | 17.50 | -17.00 | 1.26  | 7.87 | -999 | 4.00 |
| 27    | 18.00 | -17.50 | 16.62 | 6.05 | -999 | 4.00 |
| 27    | 18.01 | -17.00 | 14.65 | 4.87 | -999 | 4.00 |
| 27    | 18.46 | -16.31 | 5.82  | 3.36 | -999 | 4.00 |
| 27    | 18.50 | -16.50 | 8.79  | 5.19 | -999 | 4.00 |
| 27    | 19.00 | -18.00 | 9.79  | -999 | -999 | 4.00 |
| 27    | 18.01 | -18.50 | 9.97  | 3.22 | -999 | 4.00 |
| <hr/> |       |        |       |      |      |      |
| 28    | 32.62 | 144.58 | 1.11  | -999 | 0.75 | 5.00 |
| 28    | 32.53 | 144.61 | 0.88  | 0.28 | 0.44 | 5.00 |
| 28    | 32.06 | 144.74 | 0.73  | 0.50 | 0.59 | 5.00 |
| 28    | 31.94 | 144.77 | 0.50  | 0.25 | 0.64 | 5.00 |
| 28    | 31.64 | 144.86 | 0.77  | 0.28 | 1.05 | 5.00 |
| 28    | 31.37 | 144.93 | 0.26  | 0.35 | 0.85 | 5.00 |
| 28    | 31.00 | 145.03 | 0.25  | 0.27 | 0.88 | 5.00 |
| 28    | 30.77 | 145.09 | 0.64  | 0.12 | 0.99 | 5.00 |
| 28    | 30.41 | 145.19 | 0.68  | -999 | 1.17 | 5.00 |
| 28    | 30.21 | 145.25 | 0.40  | 0.14 | 1.01 | 5.00 |
| 28    | 28.00 | 145.36 | 0.36  | 0.71 | 1.49 | 5.00 |



|    |       |        |       |      |      |      |
|----|-------|--------|-------|------|------|------|
| 28 | 27.72 | 145.36 | 0.63  | 0.64 | 1.59 | 5.00 |
| 28 | 27.49 | 145.36 | 0.60  | 0.60 | 1.10 | 5.00 |
| 28 | 27.25 | 145.36 | 0.61  | 0.65 | 1.91 | 5.00 |
| 28 | 27.00 | 145.36 | 0.58  | 0.71 | 1.17 | 5.00 |
| 28 | 25.80 | 145.36 | 0.36  | 0.61 | 1.87 | 5.00 |
| 28 | 25.61 | 145.36 | 0.58  | 0.60 | -999 | 5.00 |
| 28 | 24.02 | 145.83 | 2.56  | 0.59 | 1.31 | 5.00 |
| 28 | 23.48 | 146.00 | 0.49  | 0.24 | 0.99 | 5.00 |
| 28 | 23.21 | 146.09 | 0.67  | 0.15 | -999 | 5.00 |
| 28 | 22.93 | 146.18 | 0.94  | 0.21 | 0.77 | 5.00 |
| 28 | 22.40 | 146.35 | 0.24  | 0.29 | 1.11 | 5.00 |
| 28 | 22.15 | 146.43 | 0.25  | 0.31 | 1.12 | 5.00 |
| 28 | 21.93 | 146.50 | 0.24  | 0.27 | 1.36 | 5.00 |
| 28 | 21.84 | 146.53 | 0.19  | 0.41 | 1.30 | 5.00 |
| 28 | 20.30 | 147.03 | 1.93  | 0.93 | 3.29 | 5.00 |
| 28 | 19.73 | 147.21 | 0.97  | 0.64 | 2.57 | 5.00 |
| 28 | 19.18 | 147.39 | 0.62  | 0.49 | 1.25 | 5.00 |
| 28 | 18.62 | 147.56 | 0.61  | 0.72 | 1.78 | 5.00 |
| 28 | 18.06 | 147.74 | 0.97  | 0.53 | 1.87 | 5.00 |
| 28 | 17.52 | 147.91 | 0.63  | -999 | -999 | 5.00 |
| 28 | 17.01 | 148.07 | 0.82  | 0.54 | 1.49 | 5.00 |
| 28 | 16.68 | 148.18 | 0.95  | 0.74 | 1.38 | 5.00 |
| 28 | 16.53 | 148.22 | 0.57  | 0.57 | 1.97 | 5.00 |
| 28 | 16.07 | 148.37 | 0.37  | 0.44 | 1.87 | 5.00 |
| 28 | 15.62 | 148.51 | 1.64  | 0.69 | 2.56 | 5.00 |
| 28 | 15.16 | 148.65 | 1.45  | 0.69 | 2.08 | 5.00 |
| 28 | 14.67 | 148.79 | 0.87  | 0.52 | 2.28 | 5.00 |
| 28 | 14.19 | 148.95 | 0.64  | 0.44 | 1.63 | 5.00 |
| 28 | 13.64 | 149.12 | 0.65  | 0.53 | 1.65 | 5.00 |
| 28 | 13.09 | 149.29 | 1.28  | 0.88 | 2.69 | 5.00 |
| 28 | 12.55 | 149.46 | 0.98  | 0.65 | 2.22 | 5.00 |
| 28 | 12.02 | 149.62 | 1.11  | 0.39 | 0.94 | 5.00 |
| 28 | 11.47 | 149.79 | 0.99  | 0.71 | 2.28 | 5.00 |
| 28 | 10.92 | 149.96 | 1.63  | 0.65 | 1.52 | 5.00 |
| 28 | 10.34 | 150.14 | 0.64  | 0.38 | 1.02 | 5.00 |
| 28 | 9.17  | 150.49 | 11.62 | 0.56 | 0.83 | 5.00 |
| 28 | 8.58  | 150.67 | 4.92  | 1.34 | 0.90 | 5.00 |
| 28 | 7.98  | 150.85 | 3.49  | 1.16 | 0.77 | 5.00 |
| 28 | 7.64  | 150.96 | 2.92  | 0.46 | 1.26 | 5.00 |
| 28 | 7.39  | 151.03 | 4.05  | 1.22 | 0.49 | 5.00 |
| 28 | 6.80  | 151.21 | 2.69  | 0.79 | 0.95 | 5.00 |
| 28 | 6.21  | 151.40 | 0.80  | 0.60 | 1.26 | 5.00 |
| 28 | 5.61  | 151.58 | 1.30  | 0.64 | 3.54 | 5.00 |
| 28 | 3.84  | 152.12 | 0.85  | 0.54 | 1.34 | 5.00 |
| 28 | 3.27  | 152.30 | 1.51  | 0.61 | 0.85 | 5.00 |
| 28 | 2.70  | 152.47 | 1.37  | 0.64 | 2.88 | 5.00 |
| 28 | 2.11  | 152.65 | 1.42  | 0.83 | 1.93 | 5.00 |

|    |        |        |       |      |      |      |
|----|--------|--------|-------|------|------|------|
| 28 | 1.52   | 152.83 | 1.50  | 0.99 | -999 | 5.00 |
| 28 | 0.91   | 153.02 | 1.76  | 1.07 | 2.00 | 5.00 |
| 28 | 0.31   | 153.20 | 1.30  | 1.08 | 1.52 | 5.00 |
| 28 | -0.28  | 153.38 | 1.23  | 0.68 | 1.52 | 5.00 |
| 28 | -0.86  | 153.56 | 1.17  | 0.85 | 1.49 | 5.00 |
| 28 | -1.44  | 153.74 | 1.76  | 0.96 | 1.36 | 5.00 |
| 28 | -2.03  | 153.85 | 3.52  | 1.60 | 1.54 | 5.00 |
| 28 | -2.62  | 153.90 | 2.10  | 1.26 | 2.13 | 5.00 |
| 28 | -3.21  | 153.94 | 27.10 | 0.81 | 2.75 | 5.00 |
| 28 | -3.80  | 153.99 | 6.92  | 0.85 | 1.51 | 5.00 |
| 28 | -4.33  | 153.85 | 5.58  | 1.17 | 1.72 | 5.00 |
| 28 | -4.87  | 153.89 | 9.59  | 1.11 | 1.82 | 5.00 |
| 28 | -5.41  | 153.95 | 10.35 | 0.91 | -999 | 5.00 |
| 28 | -5.95  | 154.01 | 10.33 | 1.26 | 3.22 | 5.00 |
| 28 | -6.51  | 154.08 | 8.58  | 0.69 | 2.90 | 5.00 |
| 28 | -7.02  | 154.14 | 7.16  | 1.01 | 1.59 | 5.00 |
| 28 | -7.48  | 154.19 | 5.96  | 1.14 | 1.54 | 5.00 |
| 28 | -7.93  | 154.24 | 2.65  | 1.44 | 1.77 | 5.00 |
| 28 | -8.40  | 154.30 | 6.69  | 1.83 | 3.37 | 5.00 |
| 28 | -8.88  | 154.35 | 2.26  | 0.61 | 0.60 | 5.00 |
| 28 | -9.36  | 154.41 | 4.16  | 1.07 | 0.90 | 5.00 |
| 28 | -9.85  | 154.46 | 4.43  | 1.36 | 1.70 | 5.00 |
| 28 | -10.40 | 154.53 | 6.70  | 1.45 | 1.22 | 5.00 |
| 28 | -10.93 | 154.59 | 6.34  | 0.57 | 1.40 | 5.00 |
| 28 | -11.44 | 154.65 | 2.87  | 1.07 | 1.16 | 5.00 |
| 28 | -11.84 | 154.26 | 2.63  | 1.01 | 1.81 | 5.00 |
| 28 | -12.20 | 153.70 | 3.56  | 1.38 | 0.78 | 5.00 |
| 28 | -12.53 | 153.18 | 6.30  | 2.17 | 1.91 | 5.00 |
| 28 | -12.87 | 152.64 | 9.44  | 2.91 | -999 | 5.00 |
| 28 | -13.23 | 152.08 | 2.05  | 0.71 | -999 | 5.00 |
| 28 | -13.54 | 151.58 | 2.45  | 0.94 | 1.16 | 5.00 |
| 28 | -13.86 | 151.08 | 3.02  | 1.14 | 0.88 | 5.00 |
| 28 | -14.17 | 150.58 | 1.62  | 0.98 | 1.93 | 5.00 |
| 28 | -14.48 | 150.08 | 1.70  | 0.83 | 1.42 | 5.00 |
| 28 | -14.78 | 149.62 | 1.57  | 0.93 | 2.25 | 5.00 |
| 28 | -15.10 | 149.11 | 1.65  | 1.02 | 1.86 | 5.00 |
| 28 | -15.73 | 148.10 | 2.45  | 1.02 | -999 | 5.00 |
| 28 | -16.51 | 147.37 | 4.53  | 1.34 | 1.19 | 5.00 |
| 28 | -17.03 | 147.33 | 2.09  | 0.78 | 1.84 | 5.00 |
| 28 | -17.51 | 147.30 | 2.50  | 1.21 | 0.93 | 5.00 |
| 28 | -17.83 | 147.25 | 2.22  | 0.96 | 1.37 | 5.00 |
| 28 | -17.98 | 147.21 | 3.16  | 1.70 | 1.59 | 5.00 |
| 28 | -18.13 | 147.18 | 13.53 | 3.21 | 1.37 | 5.00 |
| 28 | -18.25 | 147.09 | 20.38 | 4.47 | 1.42 | 5.00 |
| 28 | -18.37 | 146.98 | 7.76  | 2.00 | 0.75 | 5.00 |
| 28 | -18.51 | 146.93 | 15.11 | 4.29 | 1.46 | 5.00 |
| 28 | -18.66 | 146.92 | 16.43 | 4.98 | -999 | 5.00 |

---

|    |       |        |        |       |      |       |
|----|-------|--------|--------|-------|------|-------|
| 29 | 42.79 | -9.37  | 38.79  | 15.96 | -999 | 4.00  |
| 29 | 42.47 | -9.21  | 36.25  | 4.20  | -999 | 3.00  |
| 29 | 42.38 | -9.15  | 39.49  | 14.54 | -999 | 4.00  |
| 29 | 42.08 | -9.14  | 43.69  | 15.27 | -999 | 4.00  |
| 29 | 41.93 | -9.15  | 74.35  | 22.76 | -999 | 3.00  |
| 29 | 41.64 | -9.13  | 119.72 | 28.98 | -999 | 3.00  |
| 29 | 41.64 | -9.13  | 74.43  | 15.69 | -999 | 10.00 |
| 29 | 41.35 | -8.92  | 30.19  | 9.33  | -999 | 4.00  |
| 29 | 41.20 | -8.94  | 36.85  | 12.98 | -999 | 4.00  |
| 29 | 40.91 | -9.01  | 34.21  | 12.65 | -999 | 3.00  |
| 29 | 40.91 | -9.01  | 52.04  | 17.13 | -999 | 7.00  |
| 29 | 40.76 | -9.04  | 34.47  | 12.11 | -999 | 3.00  |
| 29 | 40.61 | -9.08  | -999   | -999  | -999 | 5.00  |
| 29 | 40.46 | -9.03  | -999   | -999  | -999 | 5.00  |
| 29 | 40.46 | -9.03  | -999   | -999  | -999 | 10.00 |
| 29 | 40.26 | -9.08  | 15.52  | 10.86 | -999 | 5.00  |
| 29 | 40.26 | -9.08  | 14.99  | 9.04  | -999 | 10.00 |
| 29 | 40.07 | -9.14  | 11.62  | 7.27  | -999 | 3.00  |
| 29 | 40.02 | -9.15  | 11.79  | 9.20  | -999 | 3.00  |
| 29 | 39.90 | -9.18  | 10.51  | 6.89  | -999 | 3.00  |
| 29 | 39.76 | -9.22  | -999   | -999  | -999 | 3.00  |
| 29 | 39.76 | -9.22  | 9.38   | 5.54  | -999 | 10.00 |
| 29 | 39.62 | -9.30  | -999   | -999  | -999 | 3.00  |
| 29 | 39.49 | -9.41  | 10.70  | 8.32  | -999 | 3.00  |
| 29 | 39.06 | -9.57  | 185.15 | 60.40 | -999 | 4.00  |
| 29 | 39.06 | -9.57  | 172.80 | 54.32 | -999 | 10.00 |
| 29 | 40.00 | -9.08  | 1.32   | -999  | -999 | 3.00  |
| 29 | 40.00 | -9.08  | 2.19   | 0.78  | -999 | 10.00 |
| 29 | 40.00 | -9.08  | 13.75  | 4.48  | -999 | 10.00 |
| 29 | 40.00 | -9.08  | 13.53  | 5.37  | -999 | 3.00  |
| 29 | 40.00 | -9.08  | 13.07  | 8.71  | -999 | 10.00 |
| 29 | 40.00 | -9.08  | 13.93  | 8.68  | -999 | 3.00  |
| 29 | 40.00 | -9.08  | 14.51  | 8.97  | -999 | 10.00 |
| 29 | 40.00 | -9.08  | 12.86  | 9.07  | -999 | 3.00  |
| 29 | 40.00 | -9.08  | -999   | -999  | -999 | 10.00 |
| 29 | 40.00 | -9.08  | 13.00  | 10.14 | -999 | 3.00  |
| 29 | 41.00 | -9.00  | 29.01  | 11.33 | -999 | 5.00  |
| 29 | 41.00 | -9.00  | 20.68  | 10.00 | -999 | 4.00  |
| 29 | 41.00 | -9.00  | 15.44  | 8.61  | -999 | 2.00  |
| 29 | 41.00 | -9.00  | 26.22  | 10.74 | -999 | 3.00  |
| 29 | 41.00 | -9.00  | 24.80  | 10.67 | -999 | 10.00 |
| 29 | 41.00 | -9.00  | 25.82  | 9.80  | -999 | 3.00  |
| 29 | 41.00 | -10.50 | 5.01   | 3.25  | -999 | 7.00  |
| 29 | 41.00 | -10.50 | 3.77   | 2.71  | -999 | 6.00  |
| 29 | 41.00 | -10.50 | -999   | 3.33  | -999 | 3.00  |
| 29 | 41.00 | -10.50 | 5.03   | 2.35  | -999 | 7.00  |
| 29 | 41.00 | -10.50 | 5.03   | 3.93  | -999 | 4.00  |

|    |        |        |       |      |      |       |
|----|--------|--------|-------|------|------|-------|
| 29 | 41.00  | -10.50 | 4.59  | 3.91 | -999 | 4.00  |
| 29 | 40.00  | -9.91  | 13.58 | 7.17 | -999 | 4.00  |
| 29 | 40.00  | -9.74  | 15.56 | 7.58 | -999 | 3.00  |
| 29 | 40.00  | -9.48  | 14.73 | 6.79 | -999 | 3.00  |
| 29 | 40.00  | -9.31  | 10.59 | 8.47 | -999 | 3.00  |
| 29 | 40.00  | -9.09  | 11.35 | 8.19 | -999 | 5.00  |
| 29 | 40.00  | -9.00  | 19.46 | 8.25 | -999 | 3.00  |
| 29 | 40.33  | -9.17  | 12.25 | 4.73 | -999 | 4.00  |
| 29 | 40.33  | -9.17  | -999  | -999 | -999 | 10.00 |
| 29 | 40.33  | -9.17  | 11.53 | 1.95 | -999 | 3.00  |
| 29 | 40.33  | -9.17  | 9.25  | 4.68 | -999 | 3.00  |
| 29 | 40.33  | -9.17  | -999  | -999 | -999 | 10.00 |
| 29 | 40.33  | -9.17  | 13.55 | 5.13 | -999 | 3.00  |
| 29 | 40.33  | -9.17  | -999  | -999 | -999 | 10.00 |
| 29 | 40.33  | -9.17  | 12.84 | 5.38 | -999 | 3.00  |
| 29 | 40.33  | -9.17  | 11.79 | 4.63 | -999 | 3.00  |
| 29 | 40.33  | -9.17  | -999  | -999 | -999 | 10.00 |
| 29 | 40.38  | -9.12  | 10.33 | 4.50 | -999 | 5.00  |
| 29 | 40.33  | -9.39  | 12.45 | 5.63 | -999 | 3.00  |
| 29 | 40.33  | -9.51  | 14.81 | 5.43 | -999 | 3.00  |
| 29 | 40.33  | -10.08 | 13.88 | 5.06 | -999 | 4.00  |
| 29 | 40.32  | -10.60 | 12.81 | 4.36 | -999 | 3.00  |
| 29 | 40.31  | -11.12 | 7.44  | 3.90 | -999 | 3.00  |
| 29 | 40.12  | -10.79 | 15.08 | 4.91 | -999 | 3.00  |
| 29 | 40.53  | -10.52 | 9.72  | 4.23 | -999 | 3.00  |
| 29 | 40.66  | -9.88  | 6.86  | 2.75 | -999 | 5.00  |
| 29 | 40.42  | -9.51  | 16.24 | 7.86 | -999 | 5.00  |
| 30 | 59.50  | -21.13 | 1.10  | -999 | -999 | 2.90  |
| 30 | 59.50  | -21.13 | 1.80  | -999 | -999 | 1.70  |
| 30 | 59.57  | -21.12 | 1.90  | -999 | -999 | 1.00  |
| 30 | 59.57  | -21.05 | 1.60  | -999 | -999 | 1.60  |
| 30 | 59.57  | -21.05 | 1.20  | -999 | -999 | 4.90  |
| 30 | 59.89  | -21.25 | 0.90  | -999 | -999 | 2.00  |
| 30 | 59.89  | -21.25 | 0.90  | -999 | -999 | 9.20  |
| 30 | 59.91  | -20.74 | 0.80  | -999 | -999 | 5.20  |
| 30 | 59.89  | -20.68 | 0.80  | -999 | -999 | 1.50  |
| 30 | 59.89  | -20.68 | 0.80  | -999 | -999 | 4.70  |
| 30 | 59.85  | -20.66 | 5.00  | -999 | -999 | 1.60  |
| 30 | 59.85  | -20.66 | 3.40  | -999 | -999 | 9.20  |
| 30 | 61.20  | -20.52 | 0.40  | -999 | -999 | 1.10  |
| 30 | 61.20  | -20.52 | 1.30  | -999 | -999 | 6.20  |
| 30 | 60.43  | -20.66 | 0.40  | -999 | -999 | 2.20  |
| 30 | 60.43  | -20.66 | 0.50  | -999 | -999 | 4.10  |
| 30 | 59.76  | -20.99 | 0.30  | -999 | -999 | 2.00  |
| 30 | 59.81  | -20.96 | 0.40  | -999 | -999 | 1.80  |
| 30 | 59.81  | -20.96 | 0.30  | -999 | -999 | 9.00  |
| 31 | -60.21 | -56.14 | 2.10  | 2.90 | -999 | 9.00  |

|    |        |        |       |       |      |      |
|----|--------|--------|-------|-------|------|------|
| 31 | -61.13 | -55.51 | 5.90  | 1.10  | -999 | 9.00 |
| 31 | -61.09 | -55.57 | 1.30  | 0.40  | -999 | 9.00 |
| 31 | -63.81 | -54.15 | -999  | 1.20  | -999 | 9.00 |
| 31 | -62.58 | -54.23 | 2.20  | 2.30  | -999 | 9.00 |
| 31 | -61.26 | -54.17 | -999  | 3.20  | -999 | 9.00 |
| 31 | -61.14 | -54.21 | 1.90  | -999  | -999 | 9.00 |
| 31 | -62.29 | -55.56 | 3.50  | -999  | -999 | 9.00 |
| 31 | -62.36 | -56.01 | 4.10  | -999  | 3.20 | 9.00 |
| 31 | -62.42 | -56.01 | 6.80  | 3.10  | -999 | 9.00 |
| 31 | -61.44 | -57.54 | 6.20  | 3.00  | -999 | 9.00 |
| 31 | -61.29 | -58.05 | 6.50  | 5.00  | -999 | 9.00 |
| 31 | -61.15 | -58.16 | 2.20  | 4.70  | -999 | 9.00 |
| 31 | -61.24 | -58.08 | 10.60 | 1.90  | -999 | 9.00 |
| 31 | -61.36 | -58.00 | 3.50  | 7.20  | -999 | 9.00 |
| 31 | -63.00 | -56.58 | 22.70 | 1.50  | 1.50 | 9.00 |
| 31 | -61.45 | -57.51 | 5.20  | 18.60 | -999 | 9.00 |
| 31 | -61.43 | -57.53 | 37.40 | 4.50  | -999 | 9.00 |
| 31 | -60.20 | -58.52 | 7.80  | 7.00  | -999 | 9.00 |
| 31 | -60.59 | -58.27 | 3.80  | 8.60  | -999 | 9.00 |
| 31 | -61.17 | -58.10 | 4.80  | 4.20  | -999 | 9.00 |
| 31 | -61.07 | -58.21 | 4.20  | 2.50  | -999 | 9.00 |
| 31 | -61.33 | -58.00 | 3.90  | 4.50  | -999 | 9.00 |
| 31 | -62.14 | -57.34 | 13.00 | 5.40  | -999 | 9.00 |
| 31 | -62.13 | -57.43 | 10.70 | 6.50  | -999 | 9.00 |
| 31 | -63.22 | -56.57 | 10.90 | 1.40  | -999 | 9.00 |
| 31 | -62.46 | -59.06 | 9.60  | 6.60  | -999 | 9.00 |
| 31 | -62.56 | -59.00 | 7.70  | 2.90  | -999 | 9.00 |
| 31 | -63.26 | -59.55 | 3.20  | 3.60  | -999 | 9.00 |
| 31 | -61.13 | -60.00 | -999  | 3.60  | -999 | 9.00 |
| 31 | -62.58 | -60.13 | 3.70  | 2.90  | -999 | 9.00 |
| 31 | -62.49 | -60.19 | 5.80  | 2.40  | -999 | 9.00 |
| 31 | -61.30 | -63.10 | -999  | 2.00  | -999 | 9.00 |
| 31 | -61.44 | -63.32 | 2.10  | 1.30  | -999 | 9.00 |
| 31 | -63.10 | -61.49 | 10.20 | 1.50  | -999 | 9.00 |
| 31 | -63.18 | -61.33 | 4.20  | 2.40  | 2.00 | 9.00 |
| 31 | -63.24 | -61.25 | 9.40  | 1.40  | -999 | 9.00 |
| 31 | -64.45 | -65.16 | 23.80 | 5.70  | -999 | 9.00 |
| 31 | -64.24 | -65.59 | 5.30  | 2.80  | -999 | 9.00 |
| 31 | -63.12 | -67.38 | 5.40  | 4.10  | -999 | 9.00 |
| 31 | -62.05 | -65.06 | 5.10  | -999  | 2.00 | 9.00 |
| 31 | -61.51 | -64.33 | -999  | 3.30  | -999 | 9.00 |
| 31 | -61.57 | -64.14 | 5.80  | 3.00  | 1.90 | 9.00 |
| 31 | -66.49 | -63.10 | 2.90  | 7.50  | -999 | 9.00 |
| 31 | -64.58 | -63.25 | 4.70  | 5.00  | 2.40 | 9.00 |
| 31 | -65.00 | -63.51 | 4.70  | 3.90  | -999 | 9.00 |
| 31 | -65.03 | -63.50 | 1.00  | 3.50  | -999 | 9.00 |
| 31 | -66.49 | -69.09 | 2.70  | 2.40  | 1.20 | 9.00 |

|    |        |        |         |      |      |       |
|----|--------|--------|---------|------|------|-------|
| 31 | -66.47 | -69.16 | -999    | 6.90 | 7.90 | 9.00  |
| 31 | -63.30 | -66.58 | -999    | 1.80 | -999 | 9.00  |
| 31 | -64.28 | -64.47 | 8.50    | 3.20 | 1.70 | 9.00  |
| 31 | -64.42 | -65.18 | -999    | 4.20 | 2.30 | 9.00  |
| 31 | -64.27 | -68.17 | 4.40    | 4.10 | 2.90 | 9.00  |
| 31 | -61.24 | -68.25 | -999    | 6.50 | 0.60 | 9.00  |
| 31 | -66.16 | -69.11 | 3.90    | 4.40 | -999 | 9.00  |
| 31 | -63.40 | -63.38 | 2.90    | 3.90 | 2.80 | 9.00  |
| 31 | -62.50 | -60.24 | -999.00 | 4.20 | 2.80 | 9.00  |
| 31 | 62.54  | -61.02 | -999    | -999 | 1.00 | 9.00  |
| 31 | -62.35 | -59.13 | 1.30    | 2.90 | -999 | 9.00  |
| 31 | -62.51 | -59.57 | 1.00    | 2.90 | -999 | 9.00  |
| 31 | -62.18 | -58.39 | 4.60    | 0.90 | -999 | 9.00  |
| 31 | -63.28 | -56.35 | 3.80    | 1.40 | 2.60 | 9.00  |
| 31 | -62.38 | -56.35 | 4.10    | 4.40 | -999 | 9.00  |
| 31 | -62.52 | -56.55 | 15.90   | 5.40 | 3.60 | 9.00  |
| 31 | -62.26 | -56.28 | 3.40    | 4.10 | 2.00 | 9.00  |
| 31 | -62.00 | -56.00 | -999    | 3.50 | -999 | 9.00  |
| 31 | -61.14 | -54.54 | 4.20    | 6.20 | 3.30 | 9.00  |
| 31 | -60.50 | -55.34 | 3.90    | 4.20 | 1.30 | 9.00  |
| 31 | -60.51 | -55.46 | 1.40    | 0.30 | -999 | 9.00  |
| 31 | -60.57 | -55.10 | 2.20    | 1.90 | 1.50 | 9.00  |
| 32 | 42.00  | 29.20  | 31.63   | 3.24 | -999 | 5.00  |
| 32 | 41.30  | 29.50  | -999    | 1.32 | -999 | 10.00 |
| 33 | 57.19  | 11.67  | 13.85   | 1.96 | -999 | 0.00  |
| 33 | 57.19  | 11.67  | 17.80   | 2.07 | -999 | 5.00  |
| 33 | 57.19  | 11.67  | 16.62   | 1.90 | -999 | 10.00 |
| 33 | 56.67  | 12.12  | 17.41   | 2.93 | -999 | 0.00  |
| 33 | 56.67  | 12.12  | 11.47   | 2.19 | -999 | 5.00  |
| 33 | 56.67  | 12.12  | 15.03   | 2.01 | -999 | 10.00 |
| 33 | 55.25  | 15.98  | 7.68    | 2.36 | -999 | 0.00  |
| 33 | 55.25  | 15.98  | 7.91    | 1.32 | -999 | 5.00  |
| 33 | 55.25  | 15.98  | 7.87    | 1.27 | -999 | 10.00 |
| 33 | 56.63  | 19.58  | 6.73    | 1.90 | -999 | 0.00  |
| 33 | 56.63  | 19.58  | 8.31    | 2.07 | -999 | 10.00 |
| 33 | 57.07  | 19.83  | 7.91    | 1.21 | -999 | 0.00  |
| 33 | 57.33  | 20.05  | 7.91    | 1.55 | -999 | 0.00  |
| 33 | 57.33  | 20.05  | 7.91    | 1.67 | -999 | 5.00  |
| 33 | 57.33  | 20.05  | 7.91    | 1.73 | -999 | 10.00 |
| 33 | 57.62  | 20.17  | 15.03   | 2.13 | -999 | 0.00  |
| 33 | 58.44  | 20.33  | 10.68   | 1.90 | -999 | 0.00  |
| 33 | 58.44  | 20.33  | 8.70    | 1.55 | -999 | 5.00  |
| 33 | 58.44  | 20.33  | 8.31    | 1.55 | -999 | 10.00 |
| 33 | 58.88  | 20.32  | 10.68   | 1.67 | -999 | 0.00  |
| 33 | 58.88  | 20.32  | 8.70    | 1.61 | -999 | 5.00  |
| 33 | 58.88  | 20.32  | 35.61   | 1.96 | -999 | 10.00 |
| 34 | 19.28  | 19.28  | 10.88   | 1.96 | -999 | 0.00  |

|    |       |       |        |      |      |       |
|----|-------|-------|--------|------|------|-------|
| 34 | 19.28 | 19.28 | 10.05  | 1.98 | -999 | 10.00 |
| 34 | 19.58 | 19.58 | 8.63   | 2.18 | -999 | 0.00  |
| 34 | 19.83 | 19.83 | 7.99   | 1.89 | -999 | 0.00  |
| 34 | 20.05 | 20.05 | 10.01  | 2.46 | -999 | 0.00  |
| 34 | 20.05 | 20.05 | 9.61   | 2.24 | -999 | 5.00  |
| 34 | 20.05 | 20.05 | 10.45  | 2.44 | -999 | 10.00 |
| 34 | -999  | -999  | 11.99  | 2.20 | -999 | 0.00  |
| 34 | 19.95 | 19.95 | 11.28  | 1.94 | -999 | 5.00  |
| 34 | 19.95 | 19.95 | 10.84  | 2.17 | -999 | 10.00 |
| 34 | 20.33 | 20.33 | 13.25  | 2.94 | -999 | 0.00  |
| 34 | 20.33 | 20.33 | 14.01  | 2.25 | -999 | 5.00  |
| 34 | 20.33 | 20.33 | 12.38  | 2.13 | -999 | 10.00 |
| 34 | -999  | -999  | 9.93   | 2.59 | -999 | 0.00  |
| 34 | 20.32 | 20.32 | 13.85  | 1.96 | -999 | 5.00  |
| 34 | 20.32 | 20.32 | 14.28  | 2.50 | -999 | 10.00 |
| 35 | 52.61 | 4.00  | 380.90 | 0.60 | 3.03 | 1.80  |
| 35 | 52.61 | 4.33  | 280.90 | 0.60 | 1.69 | 1.80  |
| 35 | 52.47 | 3.70  | 287.60 | 0.60 | -999 | 1.80  |
| 35 | 52.36 | 3.27  | 169.50 | -999 | 2.25 | 1.80  |
| 35 | 52.25 | 2.84  | 119.80 | -999 | 1.69 | 1.80  |
| 35 | 52.16 | 2.33  | 164.00 | 3.30 | 4.09 | 1.80  |
| 35 | 52.08 | 1.83  | 249.80 | 5.50 | -999 | 1.80  |
| 35 | 51.79 | 1.78  | 218.70 | 6.40 | 2.89 | 1.80  |
| 35 | 51.50 | 1.75  | 217.80 | 8.60 | -999 | 1.80  |
| 35 | 51.75 | 3.00  | 153.20 | 0.60 | -999 | 1.80  |
| 35 | 51.83 | 3.36  | 369.30 | 3.70 | 3.80 | 1.80  |
| 35 | 52.13 | 3.50  | 125.90 | 1.10 | 6.48 | 1.80  |
| 35 | 52.22 | 3.87  | 114.00 | 3.10 | 5.00 | 1.80  |
| 35 | 52.35 | 4.00  | 51.20  | -999 | 8.03 | 1.80  |
| 35 | 52.62 | 3.76  | 153.20 | 3.10 | 4.23 | 1.80  |
| 35 | 53.00 | 3.43  | 168.60 | 9.30 | -999 | 1.80  |
| 35 | 53.19 | 3.27  | 174.50 | 4.80 | 2.33 | 1.80  |
| 35 | 53.51 | 2.99  | 198.00 | 4.30 | 2.33 | 1.80  |
| 35 | 53.41 | 3.45  | 157.90 | 8.20 | 4.72 | 1.80  |
| 35 | 53.30 | 4.00  | 164.90 | 5.50 | 4.09 | 1.80  |
| 35 | 53.23 | 4.33  | 36.40  | 2.30 | 4.09 | 1.80  |
| 35 | 53.17 | 4.59  | 56.70  | 1.20 | -999 | 1.80  |
| 35 | 53.65 | 4.83  | 105.00 | 3.10 | 2.33 | 1.80  |
| 35 | 53.92 | 4.83  | 184.60 | 6.50 | 2.33 | 1.80  |
| 35 | 54.25 | 4.83  | 135.20 | 5.30 | 2.11 | 1.80  |
| 35 | 54.32 | 5.25  | 102.90 | 3.80 | 2.04 | 1.80  |
| 35 | 54.05 | 5.67  | 73.90  | 3.00 | 2.18 | 1.80  |
| 35 | 53.83 | 6.00  | 91.00  | 3.60 | 2.25 | 1.80  |
| 35 | 53.65 | 6.17  | 45.70  | 1.10 | 3.52 | 1.80  |
| 35 | 53.72 | 6.50  | 61.10  | 1.30 | 4.51 | 1.80  |
| 35 | 53.92 | 6.42  | 71.50  | 2.10 | 3.31 | 1.80  |
| 35 | 54.10 | 6.42  | 55.80  | 2.40 | 2.54 | 1.80  |

|    |       |       |         |       |      |      |
|----|-------|-------|---------|-------|------|------|
| 35 | 54.34 | 6.42  | 69.20   | 3.00  | 2.68 | 1.80 |
| 35 | 54.41 | 6.71  | 76.80   | 2.30  | 2.61 | 1.80 |
| 35 | 54.25 | 6.99  | 67.20   | 3.00  | 2.40 | 1.80 |
| 35 | 54.01 | 7.24  | 84.90   | 3.50  | 2.89 | 1.80 |
| 35 | 53.82 | 7.34  | 38.40   | 1.30  | 2.47 | 1.80 |
| 35 | 54.19 | 7.47  | 88.70   | 3.10  | 2.89 | 1.80 |
| 35 | 54.41 | 7.66  | 140.40  | 6.80  | 3.45 | 1.80 |
| 35 | 54.67 | 7.67  | 70.70   | 3.80  | 3.24 | 1.80 |
| 35 | 55.16 | 7.67  | 96.50   | 3.00  | 3.59 | 1.80 |
| 35 | 55.45 | 7.66  | 66.60   | 3.50  | 2.89 | 1.80 |
| 35 | 55.50 | 6.50  | 116.90  | 5.10  | 2.61 | 1.80 |
| 35 | 55.50 | 5.50  | 117.50  | 3.80  | 2.68 | 1.80 |
| 35 | 55.50 | -0.06 | 601.80  | 20.40 | 2.11 | 1.80 |
| 35 | 55.50 | -0.53 | 63.40   | 3.50  | 2.82 | 1.80 |
| 35 | 55.51 | -0.86 | -999.00 | 3.00  | 3.31 | 1.80 |
| 35 | 55.50 | -1.20 | 66.60   | 3.80  | 2.40 | 1.80 |
| 35 | 55.49 | -1.55 | 72.70   | 4.50  | 2.82 | 1.80 |
| 35 | 55.33 | -1.50 | 46.20   | 2.10  | 2.75 | 1.80 |
| 35 | 55.17 | -1.45 | 105.60  | 2.90  | 3.59 | 1.80 |
| 35 | 55.00 | -1.30 | 34.90   | 0.60  | 3.03 | 1.80 |
| 35 | 55.00 | -0.95 | 53.50   | 3.20  | 3.24 | 1.80 |
| 35 | 54.86 | -0.55 | 106.40  | 4.70  | 2.40 | 1.80 |
| 35 | 54.73 | -0.85 | 72.70   | 4.70  | 3.03 | 1.80 |
| 35 | 54.65 | -0.89 | 71.50   | 4.40  | 2.54 | 1.80 |
| 35 | 54.58 | -0.62 | 31.70   | 2.60  | 1.97 | 1.80 |
| 35 | 54.44 | 0.00  | 50.30   | 2.60  | 1.90 | 1.80 |
| 35 | 54.33 | 1.14  | 290.80  | 7.80  | 2.75 | 1.80 |
| 35 | 54.34 | 0.77  | 74.70   | 3.90  | 2.33 | 1.80 |
| 35 | 54.33 | 0.39  | 52.00   | 2.70  | 2.47 | 1.80 |
| 35 | 54.16 | 0.40  | 69.20   | 3.30  | 1.97 | 1.80 |
| 35 | 53.91 | 0.40  | 42.70   | 2.20  | 1.97 | 1.80 |
| 35 | 53.66 | 0.40  | 27.70   | 1.50  | 3.10 | 1.80 |
| 35 | 53.50 | 0.40  | 30.80   | 2.00  | 2.68 | 1.80 |
| 35 | 53.52 | 0.69  | 40.10   | 2.00  | 2.40 | 1.80 |
| 35 | 53.59 | 1.08  | 30.00   | 1.40  | 2.61 | 1.80 |
| 35 | 53.60 | 1.56  | 41.30   | 2.00  | 2.04 | 1.80 |
| 35 | 53.58 | 2.59  | 34.60   | 1.00  | 4.51 | 1.80 |
| 35 | 53.74 | 2.75  | 49.70   | 2.80  | 4.09 | 1.80 |
| 35 | 54.08 | 2.38  | 61.10   | 2.70  | 2.89 | 1.80 |
| 35 | 54.00 | 1.06  | 82.00   | -999  | 2.47 | 1.80 |
| 35 | 53.72 | 0.71  | 30.00   | 2.10  | 4.16 | 1.80 |
| 35 | 53.33 | 0.50  | 38.10   | 2.40  | 2.47 | 1.80 |
| 35 | 53.17 | 0.51  | 20.60   | -999  | 2.54 | 1.80 |
| 35 | 52.69 | 2.41  | 64.90   | 8.10  | 4.86 | 1.80 |
| 35 | 52.36 | 3.26  | 65.30   | -999  | 3.95 | 1.80 |
| 35 | 52.25 | 2.83  | 116.30  | 6.60  | 4.65 | 1.80 |
| 35 | 52.09 | 1.84  | 78.30   | 9.50  | -999 | 1.80 |



|    |       |      |        |      |      |      |
|----|-------|------|--------|------|------|------|
| 35 | 51.78 | 1.77 | 65.70  | 5.30 | 3.95 | 1.80 |
| 35 | 51.05 | 1.84 | 163.80 | 6.90 | 3.66 | 1.80 |
| 35 | 51.46 | 2.67 | 104.90 | 5.80 | 4.44 | 1.80 |
| 35 | 51.75 | 3.00 | 62.90  | 4.60 | 3.45 | 1.80 |
| 35 | 51.84 | 3.37 | 48.30  | 4.60 | 3.17 | 1.80 |
| 35 | 52.13 | 3.50 | 65.30  | 5.20 | 3.45 | 1.80 |
| 35 | 52.22 | 3.87 | 63.70  | 5.00 | 4.44 | 1.80 |
| 35 | 52.62 | 3.76 | 91.00  | 6.30 | 3.66 | 1.80 |
| 35 | 52.78 | 3.61 | 60.10  | 5.30 | 3.17 | 1.80 |
| 35 | 53.00 | 3.43 | 44.70  | 5.30 | 2.33 | 1.80 |
| 35 | 53.20 | 3.26 | 35.00  | 5.20 | 3.52 | 1.80 |
| 35 | 53.50 | 3.01 | 55.80  | 3.80 | 2.18 | 1.80 |
| 35 | 53.41 | 3.45 | 65.30  | 6.40 | 4.65 | 1.80 |
| 35 | 53.31 | 4.00 | 69.20  | 5.50 | 2.96 | 1.80 |
| 35 | 53.24 | 4.34 | 45.10  | 4.40 | 3.38 | 1.80 |
| 35 | 53.16 | 4.62 | 37.00  | 3.90 | 5.28 | 1.80 |
| 35 | 53.65 | 4.83 | 68.80  | 5.90 | 2.82 | 1.80 |
| 35 | 53.92 | 4.84 | 41.50  | 5.70 | 2.25 | 1.80 |
| 35 | 54.25 | 4.84 | 43.90  | 4.70 | 3.24 | 1.80 |
| 35 | 54.59 | 4.83 | 37.10  | 4.70 | 2.82 | 1.80 |
| 35 | 54.32 | 5.25 | 41.50  | 4.50 | 3.59 | 1.80 |
| 35 | 54.05 | 5.67 | 47.50  | 5.10 | 3.24 | 1.80 |
| 35 | 53.83 | 6.00 | 46.30  | 4.00 | 8.17 | 1.80 |
| 35 | 53.65 | 6.17 | 31.10  | 3.00 | 6.06 | 1.80 |
| 35 | 53.71 | 6.51 | 23.30  | 2.90 | 4.30 | 1.80 |
| 35 | 53.92 | 6.42 | 21.00  | 3.20 | 6.76 | 1.80 |
| 35 | 54.10 | 6.42 | 21.00  | 4.30 | 2.40 | 1.80 |
| 35 | 54.33 | 6.41 | 35.40  | 4.20 | 2.33 | 1.80 |
| 35 | 54.59 | 6.42 | 31.40  | 4.90 | 3.31 | 1.80 |
| 35 | 54.42 | 6.70 | 24.60  | 4.20 | 2.54 | 1.80 |
| 35 | 54.10 | 7.00 | 37.50  | 4.30 | 3.24 | 1.80 |
| 35 | 53.82 | 7.34 | 12.90  | -999 | 4.30 | 1.80 |
| 35 | 54.19 | 7.47 | 29.60  | 3.40 | 5.50 | 1.80 |
| 35 | 54.26 | 7.74 | 25.80  | 2.80 | 3.52 | 1.80 |
| 35 | 54.67 | 7.67 | 22.00  | 3.30 | 2.96 | 1.80 |
| 35 | 54.92 | 7.67 | 31.80  | 5.00 | 3.38 | 1.80 |
| 35 | 55.17 | 7.67 | 26.10  | 4.30 | 4.37 | 1.80 |
| 35 | 55.45 | 7.66 | 57.80  | 6.20 | 3.88 | 1.80 |
| 35 | 55.50 | 7.00 | 53.00  | 5.80 | 3.17 | 1.80 |
| 35 | 55.50 | 6.50 | 48.30  | 6.60 | 2.68 | 1.80 |
| 35 | 55.50 | 6.01 | 26.50  | 4.90 | 3.10 | 1.80 |
| 35 | 55.50 | 5.50 | 45.90  | 4.70 | 4.30 | 1.80 |
| 35 | 55.49 | 4.99 | 19.50  | 4.10 | 4.86 | 1.80 |
| 35 | 55.50 | 4.52 | 31.00  | -999 | 4.30 | 1.80 |
| 35 | 55.50 | 3.79 | 31.20  | 4.20 | 3.24 | 1.80 |
| 35 | 55.50 | 3.17 | 33.40  | 5.10 | 3.03 | 1.80 |
| 35 | 55.50 | 2.58 | 53.40  | 5.90 | 3.38 | 1.80 |

|    |       |       |       |         |       |      |
|----|-------|-------|-------|---------|-------|------|
| 35 | 55.50 | 2.03  | 42.70 | 5.00    | 2.68  | 1.80 |
| 35 | 55.50 | 1.42  | 45.90 | 4.90    | 2.75  | 1.80 |
| 35 | 55.49 | 0.90  | 24.50 | 4.00    | 2.47  | 1.80 |
| 35 | 55.10 | 0.73  | -999  | -999    | 2.82  | 1.80 |
| 35 | 54.68 | 0.55  | 26.90 | 3.60    | 2.68  | 1.80 |
| 35 | 54.33 | 0.40  | 25.50 | 4.70    | 2.82  | 1.80 |
| 35 | 54.44 | -0.01 | 26.00 | 4.90    | 2.75  | 1.80 |
| 35 | 54.58 | -0.62 | 47.90 | 6.10    | 5.14  | 1.80 |
| 35 | 54.65 | -1.05 | 96.20 | -999    | 4.23  | 1.80 |
| 35 | 54.87 | -0.55 | 42.30 | 4.60    | 3.24  | 1.80 |
| 35 | 55.00 | -0.25 | 23.60 | 4.90    | 3.24  | 1.80 |
| 35 | 55.00 | -0.60 | 23.60 | 4.80    | 3.03  | 1.80 |
| 35 | 55.00 | -0.95 | 41.50 | 6.30    | 3.59  | 1.80 |
| 35 | 55.00 | -1.30 | 59.70 | 4.90    | 3.45  | 1.80 |
| 35 | 55.33 | -1.50 | -999  | -999    | 3.80  | 1.80 |
| 35 | 55.50 | -1.20 | 28.50 | 3.70    | 2.61  | 1.80 |
| 35 | 55.50 | -0.87 | 25.50 | 4.10    | 3.10  | 1.80 |
| 35 | 55.50 | -0.54 | 18.00 | 1.70    | 4.09  | 1.80 |
| 35 | 55.50 | -0.07 | 17.70 | 1.40    | 4.23  | 1.80 |
| 35 | 55.50 | 0.40  | 13.60 | 3.10    | 3.24  | 1.80 |
| 35 | 55.25 | 1.17  | -999  | -999    | 3.66  | 1.80 |
| 35 | 54.33 | 1.50  | 23.30 | 3.70    | 4.09  | 1.80 |
| 35 | 53.92 | 0.40  | -999  | -999    | 11.55 | 1.80 |
| 35 | 53.52 | 0.69  | 40.40 | -999    | 5.28  | 1.80 |
| 35 | 53.57 | 1.08  | 26.80 | 3.60    | 4.02  | 1.80 |
| 35 | 53.57 | 1.56  | 26.40 | 3.90    | 5.00  | 1.80 |
| 35 | 53.57 | 2.17  | 21.70 | 3.70    | 4.37  | 1.80 |
| 35 | 53.58 | 2.58  | 26.50 | -999    | 5.43  | 1.80 |
| 35 | 53.75 | 2.74  | 26.40 | 0.70    | 5.99  | 1.80 |
| 35 | 54.08 | 2.38  | 39.50 | 4.70    | 4.37  | 1.80 |
| 35 | 54.33 | 2.14  | 23.50 | 4.00    | 4.16  | 1.80 |
| 35 | 54.17 | 1.28  | 27.70 | -999    | 4.51  | 1.80 |
| 35 | 54.00 | 1.04  | 27.50 | -999    | 3.66  | 1.80 |
| 35 | 53.72 | 0.71  | 25.40 | 4.30    | 4.16  | 1.80 |
| 35 | 53.50 | 0.40  | 29.40 | 4.30    | 5.57  | 1.80 |
| 35 | 53.16 | 0.52  | 21.30 | 4.50    | 3.59  | 1.80 |
| 35 | 53.22 | 0.79  | 41.20 | 5.10    | 5.71  | 1.80 |
| 35 | 53.02 | 1.07  | 32.70 | 4.30    | 5.99  | 1.80 |
| 35 | 53.02 | 1.45  | 39.10 | -999.00 | 4.86  | 1.80 |
| 35 | 52.72 | 1.93  | 22.10 | 4.60    | 4.51  | 1.80 |
| 35 | 52.69 | 2.42  | 49.10 | 7.00    | -999  | 1.80 |
| 35 | 52.58 | 4.15  | 64.90 | 8.50    | 4.72  | 1.80 |
| 35 | 52.47 | 3.70  | 24.30 | 4.70    | 3.17  | 1.80 |
| 35 | 52.35 | 3.26  | 21.10 | 4.10    | -999  | 1.80 |
| 35 | 52.25 | 2.84  | 18.90 | 3.40    | 5.07  | 1.80 |
| 35 | 52.17 | 2.33  | 24.90 | 4.10    | 3.03  | 1.80 |
| 35 | 52.08 | 1.83  | 33.90 | 11.40   | 3.45  | 1.80 |

|    |       |       |        |       |       |      |
|----|-------|-------|--------|-------|-------|------|
| 35 | 51.78 | 1.79  | 30.00  | 6.30  | 4.72  | 1.80 |
| 35 | 51.49 | 1.75  | 21.30  | 5.40  | 5.43  | 1.80 |
| 35 | 51.18 | 1.56  | 26.60  | 5.80  | 5.00  | 1.80 |
| 35 | 51.46 | 2.67  | 39.60  | 5.80  | 12.33 | 1.80 |
| 35 | 51.75 | 3.00  | 36.00  | 5.50  | -999  | 1.80 |
| 35 | 51.84 | 3.37  | 30.90  | 6.20  | 11.98 | 1.80 |
| 35 | 52.14 | 3.51  | 22.10  | 4.40  | 11.98 | 1.80 |
| 35 | 52.22 | 3.87  | 19.70  | 4.30  | 8.24  | 1.80 |
| 35 | 52.35 | 4.00  | 18.10  | 5.30  | 5.71  | 1.80 |
| 35 | 52.61 | 3.76  | 288.40 | 5.90  | 5.92  | 1.80 |
| 35 | 52.78 | 3.62  | 19.90  | 4.50  | 5.07  | 1.80 |
| 35 | 53.00 | 3.44  | 23.30  | 5.20  | 6.34  | 1.80 |
| 35 | 53.21 | 3.27  | 19.40  | 5.00  | 5.07  | 1.80 |
| 35 | 53.50 | 3.00  | 38.40  | 5.90  | 6.62  | 1.80 |
| 35 | 53.30 | 4.00  | 29.00  | 5.30  | 6.13  | 1.80 |
| 35 | 53.22 | 4.34  | 27.10  | 5.50  | 7.96  | 1.80 |
| 35 | 53.16 | 4.61  | 26.70  | 5.40  | 6.76  | 1.80 |
| 35 | 53.65 | 4.83  | 39.80  | 5.70  | 7.26  | 1.80 |
| 35 | 53.92 | 4.84  | 28.10  | 5.60  | 7.19  | 1.80 |
| 35 | 54.25 | 4.83  | 25.20  | 4.60  | 4.30  | 1.80 |
| 35 | 54.32 | 5.25  | 25.00  | 4.80  | 5.14  | 1.80 |
| 35 | 54.05 | 5.67  | 25.20  | 5.00  | 6.06  | 1.80 |
| 35 | 53.94 | 5.84  | 18.80  | 4.40  | 4.72  | 1.80 |
| 35 | 53.83 | 6.00  | 18.40  | 4.70  | 7.19  | 1.80 |
| 35 | 53.65 | 6.16  | 19.20  | 4.40  | 8.31  | 1.80 |
| 35 | 53.72 | 6.50  | 12.70  | 3.20  | 5.50  | 1.80 |
| 35 | 53.92 | 6.42  | 17.10  | 4.40  | 6.34  | 1.80 |
| 35 | 54.10 | 6.42  | 13.80  | 3.90  | 5.21  | 1.80 |
| 35 | 54.33 | 6.42  | 17.70  | 4.60  | 3.17  | 1.80 |
| 35 | 54.42 | 6.71  | 15.00  | 4.10  | 7.68  | 1.80 |
| 35 | 55.51 | 0.90  | 24.30  | 4.60  | 6.27  | 1.80 |
| 35 | 55.51 | 0.40  | 15.30  | 4.00  | -999  | 1.80 |
| 35 | 55.50 | -0.06 | 33.20  | 5.40  | -999  | 1.80 |
| 35 | 55.51 | -1.55 | 45.10  | 8.50  | -999  | 1.80 |
| 35 | 55.02 | -1.31 | 51.00  | 7.20  | -999  | 1.80 |
| 35 | 55.00 | -0.95 | 25.70  | 5.70  | -999  | 1.80 |
| 35 | 54.99 | -0.58 | 26.40  | 6.20  | -999  | 1.80 |
| 35 | 55.00 | -0.24 | 22.00  | 5.10  | -999  | 1.80 |
| 35 | 54.86 | -0.55 | 16.90  | 4.90  | 5.21  | 1.80 |
| 35 | 54.73 | -0.85 | 18.30  | 5.20  | 3.59  | 1.80 |
| 35 | 54.65 | -1.05 | 37.70  | 6.80  | 3.10  | 1.80 |
| 35 | 54.58 | -0.62 | 24.10  | 5.20  | 5.28  | 1.80 |
| 35 | 54.51 | -0.35 | 14.00  | 4.60  | 7.47  | 1.80 |
| 35 | 54.42 | 0.02  | 14.40  | 4.40  | 3.17  | 1.80 |
| 35 | 54.33 | 0.40  | 30.00  | 4.80  | -999  | 1.80 |
| 35 | 54.65 | 0.51  | 34.70  | 5.50  | 10.57 | 1.80 |
| 35 | 54.32 | 1.15  | 148.40 | 12.80 | -999  | 1.80 |

|    |       |      |        |       |       |      |
|----|-------|------|--------|-------|-------|------|
| 35 | 53.92 | 0.40 | 29.00  | 4.80  | 3.10  | 1.80 |
| 35 | 53.67 | 0.40 | 35.60  | 5.70  | 3.10  | 1.80 |
| 35 | 53.49 | 0.41 | 24.80  | 5.20  | 4.93  | 1.80 |
| 35 | 53.32 | 0.49 | 17.10  | 5.50  | 5.78  | 1.80 |
| 35 | 53.09 | 0.50 | 19.50  | 5.00  | 4.09  | 1.80 |
| 35 | 53.22 | 0.78 | 26.00  | 5.30  | 2.68  | 1.80 |
| 35 | 53.02 | 1.45 | 33.70  | 5.80  | 5.00  | 1.80 |
| 35 | 52.61 | 4.00 | 38.10  | 4.10  | 13.74 | 1.80 |
| 35 | 52.61 | 4.33 | 37.50  | 7.20  | 33.32 | 1.80 |
| 35 | 52.57 | 4.15 | 44.70  | 6.70  | 36.35 | 1.80 |
| 35 | 52.47 | 3.70 | 23.40  | 5.80  | 42.20 | 1.80 |
| 35 | 52.36 | 3.27 | 12.70  | 4.30  | 13.74 | 1.80 |
| 35 | 52.25 | 2.84 | 17.90  | 4.90  | 13.18 | 1.80 |
| 35 | 52.08 | 1.83 | 22.80  | 9.20  | 3.95  | 1.80 |
| 35 | 51.79 | 1.79 | 19.20  | 6.30  | 5.14  | 1.80 |
| 35 | 51.50 | 1.75 | 23.20  | 6.60  | 6.48  | 1.80 |
| 35 | 51.17 | 1.56 | 20.00  | 6.10  | 13.81 | 1.80 |
| 35 | 51.05 | 1.83 | 230.40 | 26.40 | 24.52 | 1.80 |
| 35 | 51.47 | 2.68 | 30.20  | 5.60  | 29.03 | 1.80 |
| 35 | 51.76 | 3.00 | 27.30  | 4.80  | 30.44 | 1.80 |
| 35 | 52.13 | 3.49 | 14.70  | 4.60  | 30.65 | 1.80 |
| 35 | 52.21 | 3.87 | 12.90  | 4.40  | 23.39 | 1.80 |
| 35 | 52.79 | 3.62 | 18.10  | 3.90  | 22.40 | 1.80 |
| 35 | 53.00 | 3.45 | 18.10  | 4.80  | 19.80 | 1.80 |
| 35 | 53.20 | 3.27 | 26.40  | 4.30  | 5.07  | 1.80 |
| 35 | 53.50 | 3.00 | 10.20  | 4.10  | 10.99 | 1.80 |
| 35 | 53.41 | 3.45 | 12.00  | 3.60  | 3.59  | 1.80 |
| 35 | 53.30 | 4.00 | 15.50  | 4.10  | 17.40 | 1.80 |
| 35 | 53.22 | 4.35 | 11.70  | 4.50  | 52.42 | 1.80 |
| 35 | 53.16 | 4.62 | 13.10  | 6.20  | 88.07 | 1.80 |
| 35 | 53.65 | 4.83 | 10.70  | 4.10  | 22.97 | 1.80 |
| 35 | 54.05 | 5.67 | 5.30   | 3.10  | 11.20 | 1.80 |
| 35 | 53.83 | 6.00 | 6.80   | 3.40  | 15.71 | 1.80 |
| 35 | 53.65 | 6.17 | 11.70  | 4.70  | 22.69 | 1.80 |
| 35 | 53.72 | 6.50 | 8.30   | 4.40  | 16.63 | 1.80 |
| 35 | 53.91 | 6.42 | 10.10  | 4.20  | 18.46 | 1.80 |
| 35 | 54.10 | 6.41 | 9.80   | 3.90  | 10.99 | 1.80 |
| 35 | 54.33 | 6.41 | 7.10   | 3.80  | 4.79  | 1.80 |
| 35 | 54.58 | 6.42 | 17.40  | 3.70  | 4.65  | 1.80 |
| 35 | 54.42 | 6.71 | 8.00   | 4.10  | 5.50  | 1.80 |
| 35 | 54.25 | 7.00 | 9.30   | 3.90  | 6.06  | 1.80 |
| 35 | 54.10 | 6.99 | 12.90  | 4.20  | 17.12 | 1.80 |
| 35 | 54.02 | 7.23 | 8.80   | 3.90  | 11.13 | 1.80 |
| 35 | 53.82 | 7.39 | 11.00  | 4.40  | 15.92 | 1.80 |
| 35 | 54.18 | 7.47 | 12.70  | 3.90  | 7.40  | 1.80 |
| 35 | 54.27 | 7.74 | 20.20  | 4.50  | 4.23  | 1.80 |
| 35 | 54.42 | 7.66 | 29.20  | 5.10  | 3.66  | 1.80 |

|    |       |       |        |       |       |      |
|----|-------|-------|--------|-------|-------|------|
| 35 | 54.91 | 7.67  | 18.10  | 3.80  | 4.09  | 1.80 |
| 35 | 55.16 | 7.67  | 22.10  | 6.30  | 11.34 | 1.80 |
| 35 | 55.45 | 7.67  | 14.40  | 5.60  | 13.46 | 1.80 |
| 35 | 55.50 | 7.33  | 17.10  | 4.90  | 9.72  | 1.80 |
| 35 | 55.50 | 7.00  | 14.00  | 4.80  | 13.25 | 1.80 |
| 35 | 55.50 | 6.50  | 8.00   | 3.50  | 7.33  | 1.80 |
| 35 | 55.50 | 6.00  | 9.90   | 4.80  | 6.69  | 1.80 |
| 35 | 55.50 | 5.49  | 13.70  | 5.60  | 12.47 | 1.80 |
| 35 | 55.50 | 4.98  | 11.90  | 4.30  | 9.44  | 1.80 |
| 35 | 55.50 | 4.52  | 6.70   | 4.30  | 9.86  | 1.80 |
| 35 | 55.50 | 3.75  | 9.10   | 4.10  | 15.36 | 1.80 |
| 35 | 55.50 | 3.16  | 19.40  | 4.60  | 19.37 | 1.80 |
| 35 | 55.50 | 2.58  | 11.00  | 3.70  | 12.68 | 1.80 |
| 35 | 55.50 | 2.03  | 11.30  | 3.30  | 10.36 | 1.80 |
| 35 | 55.50 | 0.90  | 27.50  | 3.60  | 8.67  | 1.80 |
| 35 | 55.50 | 0.40  | 15.80  | 3.50  | 8.74  | 1.80 |
| 35 | 55.50 | -0.07 | 27.90  | 4.40  | 10.57 | 1.80 |
| 35 | 55.50 | -0.53 | 19.80  | 4.20  | 14.94 | 1.80 |
| 35 | 55.51 | -0.88 | 34.50  | 5.90  | 11.98 | 1.80 |
| 35 | 55.50 | -1.20 | 30.90  | 5.20  | 9.23  | 1.80 |
| 35 | 55.50 | -1.55 | 95.60  | 15.30 | 13.74 | 1.80 |
| 35 | 55.33 | -1.50 | 126.10 | 16.60 | 13.03 | 1.80 |
| 35 | 55.16 | -1.44 | 164.90 | 13.50 | 8.67  | 1.80 |
| 35 | 55.00 | -1.30 | 76.00  | 8.50  | 5.21  | 1.80 |
| 35 | 55.01 | -0.95 | 43.50  | 6.30  | 10.50 | 1.80 |
| 35 | 55.00 | -0.60 | 35.30  | 5.20  | 12.05 | 1.80 |
| 35 | 55.00 | -0.25 | 25.10  | 4.00  | 19.52 | 1.80 |
| 35 | 54.86 | -0.55 | 26.90  | 4.70  | 9.51  | 1.80 |
| 35 | 54.73 | -0.85 | 37.90  | 6.50  | 7.40  | 1.80 |
| 35 | 54.59 | -0.62 | 37.00  | 6.20  | 7.68  | 1.80 |
| 35 | 54.52 | -0.35 | 35.60  | 6.30  | 9.30  | 1.80 |
| 35 | 54.44 | 0.00  | 16.50  | 4.40  | 8.45  | 1.80 |
| 35 | 54.33 | 0.40  | 18.70  | 4.50  | 8.03  | 1.80 |
| 35 | 54.16 | 0.40  | 18.70  | 4.50  | 4.02  | 1.80 |
| 35 | 53.91 | 0.40  | 15.20  | 4.70  | 3.80  | 1.80 |
| 35 | 53.67 | 0.40  | 49.40  | 6.60  | 6.34  | 1.80 |
| 35 | 53.50 | 0.40  | 62.40  | 10.60 | 4.93  | 1.80 |
| 35 | 53.33 | 0.50  | 30.70  | 7.20  | 4.72  | 1.80 |
| 35 | 53.16 | 0.51  | 48.40  | 7.40  | 4.79  | 1.80 |
| 35 | 53.51 | 0.68  | 90.70  | 10.20 | 10.22 | 1.80 |
| 35 | 53.59 | 1.08  | 43.40  | 6.80  | 8.67  | 1.80 |
| 35 | 53.72 | 0.72  | 45.80  | 6.70  | 11.48 | 1.80 |
| 35 | 54.00 | 1.06  | 15.00  | 4.10  | 8.67  | 1.80 |
| 35 | 54.16 | 1.30  | 8.80   | 3.60  | 8.53  | 1.80 |
| 35 | 54.33 | 0.77  | 10.70  | 3.90  | 22.19 | 1.80 |
| 35 | 54.34 | 1.14  | 11.40  | 4.00  | -999  | 1.80 |
| 35 | 54.34 | 1.49  | 8.90   | 2.80  | 9.09  | 1.80 |

|    |       |      |        |       |       |      |
|----|-------|------|--------|-------|-------|------|
| 35 | 54.33 | 2.12 | 5.40   | 2.60  | 2.33  | 1.80 |
| 35 | 54.08 | 2.38 | 5.30   | 3.30  | 4.30  | 1.80 |
| 35 | 53.75 | 2.74 | -999   | 4.00  | 6.62  | 1.80 |
| 35 | 53.57 | 2.59 | 9.40   | 3.90  | 10.64 | 1.80 |
| 35 | 53.58 | 2.16 | 9.10   | 4.00  | 9.72  | 1.80 |
| 35 | 53.59 | 1.57 | 10.90  | 3.50  | 11.06 | 1.80 |
| 35 | 53.01 | 1.07 | -999   | 7.70  | 5.57  | 1.80 |
| 35 | 52.58 | 4.15 | 79.20  | 6.50  | 30.93 | 1.80 |
| 35 | 52.46 | 3.70 | 17.80  | 3.20  | 15.50 | 1.80 |
| 35 | 52.36 | 3.26 | 15.90  | 4.30  | 25.57 | 1.80 |
| 35 | 52.25 | 2.84 | 22.00  | 9.50  | 23.46 | 1.80 |
| 35 | 52.17 | 2.34 | 14.80  | 6.90  | 18.81 | 1.80 |
| 35 | 52.09 | 1.84 | 31.60  | 11.70 | 8.95  | 1.80 |
| 35 | 51.50 | 1.75 | 33.60  | 6.80  | 16.63 | 1.80 |
| 35 | 51.20 | 1.57 | 21.80  | 7.70  | 18.74 | 1.80 |
| 35 | 51.05 | 1.84 | 217.10 | 41.70 | 18.74 | 1.80 |
| 35 | 51.47 | 2.66 | 32.90  | 6.60  | 18.25 | 1.80 |
| 35 | 51.84 | 3.37 | 38.70  | 3.10  | 11.55 | 1.80 |
| 35 | 52.22 | 3.87 | 11.90  | 3.20  | 13.32 | 1.80 |
| 35 | 52.35 | 4.00 | 18.60  | 5.10  | 12.47 | 1.80 |
| 35 | 52.62 | 3.76 | 11.20  | 4.20  | 13.81 | 1.80 |
| 35 | 52.78 | 3.62 | 6.40   | 3.20  | 19.30 | 1.80 |
| 35 | 53.00 | 3.43 | 8.70   | 3.60  | 15.43 | 1.80 |
| 35 | 53.21 | 3.27 | 9.60   | 3.60  | 26.91 | 1.80 |
| 35 | 53.50 | 3.00 | 12.50  | 4.80  | 19.45 | 1.80 |
| 35 | 53.41 | 3.45 | 20.60  | 5.20  | 19.94 | 1.80 |
| 35 | 53.30 | 4.00 | 17.40  | 4.40  | 14.65 | 1.80 |
| 35 | 53.23 | 4.33 | 11.70  | 4.30  | 19.73 | 1.80 |
| 35 | 53.17 | 4.62 | 16.10  | 5.50  | 22.33 | 1.80 |
| 35 | 53.65 | 4.83 | 9.60   | 3.70  | 16.20 | 1.80 |
| 35 | 53.91 | 4.83 | 7.20   | 2.90  | 19.30 | 1.80 |
| 35 | 54.25 | 4.83 | 25.90  | 5.30  | 6.41  | 1.80 |
| 35 | 54.32 | 5.25 | 9.60   | 2.60  | 10.43 | 1.80 |
| 35 | 54.05 | 5.67 | 10.40  | -999  | 13.95 | 1.80 |
| 35 | 53.94 | 5.84 | 4.60   | 3.20  | 17.05 | 1.80 |
| 35 | 53.65 | 6.16 | 9.30   | 3.70  | 14.44 | 1.80 |
| 35 | 53.73 | 6.49 | 13.20  | 3.50  | 21.21 | 1.80 |
| 35 | 53.94 | 6.41 | 16.60  | 3.70  | 15.15 | 1.80 |
| 35 | 54.10 | 6.42 | 10.10  | 4.40  | 10.92 | 1.80 |
| 35 | 54.33 | 6.42 | 8.30   | 3.90  | 5.92  | 1.80 |
| 35 | 54.42 | 6.70 | 16.10  | 4.40  | 7.12  | 1.80 |
| 35 | 54.25 | 6.99 | 20.50  | 4.10  | 11.06 | 1.80 |
| 35 | 54.10 | 6.99 | 12.10  | 4.10  | 13.03 | 1.80 |
| 35 | 54.01 | 7.22 | 5.30   | 3.30  | 15.50 | 1.80 |
| 35 | 53.82 | 7.33 | 13.10  | 5.50  | 12.12 | 1.80 |
| 35 | 54.20 | 7.48 | 17.60  | 5.50  | 7.05  | 1.80 |
| 35 | 54.27 | 7.75 | 19.10  | 6.00  | 7.05  | 1.80 |

|    |       |       |        |       |       |      |
|----|-------|-------|--------|-------|-------|------|
| 35 | 54.42 | 7.67  | 37.00  | 6.70  | 8.95  | 1.80 |
| 35 | 54.67 | 7.66  | 24.60  | 6.20  | 8.95  | 1.80 |
| 35 | 54.92 | 7.66  | 19.50  | 4.70  | 6.27  | 1.80 |
| 35 | 55.17 | 7.67  | 10.30  | 4.00  | 6.62  | 1.80 |
| 35 | 55.45 | 7.67  | 8.30   | 3.60  | 7.12  | 1.80 |
| 35 | 55.50 | 7.34  | 10.40  | 3.30  | 7.47  | 1.80 |
| 35 | 55.50 | 7.00  | 5.10   | 3.30  | 6.62  | 1.80 |
| 35 | 55.50 | 6.50  | 6.90   | 3.40  | 9.30  | 1.80 |
| 35 | 55.50 | 6.00  | 11.50  | 2.90  | 7.89  | 1.80 |
| 35 | 55.50 | 5.50  | 12.00  | 3.20  | 11.34 | 1.80 |
| 35 | 55.50 | 4.98  | 8.00   | 3.50  | 9.58  | 1.80 |
| 35 | 55.50 | 4.51  | 9.70   | 4.10  | 7.33  | 1.80 |
| 35 | 55.49 | 3.75  | 8.70   | 3.20  | 8.53  | 1.80 |
| 35 | 55.50 | 3.17  | 7.80   | 2.80  | 9.09  | 1.80 |
| 35 | 55.50 | 2.58  | 6.10   | 2.60  | 8.31  | 1.80 |
| 35 | 55.50 | 2.03  | 4.40   | 3.00  | 8.95  | 1.80 |
| 35 | 55.49 | 1.41  | 8.20   | 3.00  | 12.19 | 1.80 |
| 35 | 55.50 | 0.90  | 10.40  | 2.70  | 11.98 | 1.80 |
| 35 | 55.50 | 0.40  | 4.00   | 2.80  | 10.85 | 1.80 |
| 35 | 55.50 | -0.07 | 11.20  | 3.90  | 12.12 | 1.80 |
| 35 | 55.50 | -0.53 | 12.70  | 3.20  | 7.75  | 1.80 |
| 35 | 55.50 | -0.86 | 11.80  | 3.50  | 6.62  | 1.80 |
| 35 | 55.50 | -1.20 | 11.50  | 3.00  | 8.31  | 1.80 |
| 35 | 55.50 | -1.55 | 94.10  | 15.50 | 25.01 | 1.80 |
| 35 | 55.34 | -1.50 | 84.50  | 14.30 | 20.92 | 1.80 |
| 35 | 55.17 | -1.45 | 162.50 | 14.20 | 14.58 | 1.80 |
| 35 | 55.00 | -1.30 | 275.00 | 20.40 | 15.29 | 1.80 |
| 35 | 55.00 | -0.95 | 36.80  | 5.00  | 8.17  | 1.80 |
| 35 | 55.00 | -0.60 | 19.30  | 4.30  | 11.55 | 1.80 |
| 35 | 55.00 | -0.25 | 13.10  | 2.80  | 15.36 | 1.80 |
| 35 | 54.87 | -0.55 | 12.90  | 3.20  | 9.65  | 1.80 |
| 35 | 54.73 | -0.85 | 27.40  | 5.60  | 7.89  | 1.80 |
| 35 | 54.65 | -0.90 | 61.90  | 8.60  | 9.72  | 1.80 |
| 35 | 54.58 | -0.62 | 60.00  | 9.10  | 9.16  | 1.80 |
| 35 | 54.52 | -0.35 | 30.80  | 6.20  | 7.33  | 1.80 |
| 35 | 54.43 | 0.00  | 27.00  | 4.80  | 8.67  | 1.80 |
| 35 | 54.33 | 0.40  | 13.90  | 3.90  | 16.98 | 1.80 |
| 35 | 54.68 | 0.55  | 5.20   | 2.80  | 22.62 | 1.80 |
| 35 | 55.10 | 0.73  | 7.50   | 2.90  | 12.26 | 1.80 |
| 35 | 55.25 | 1.17  | 7.20   | 3.90  | 14.65 | 1.80 |
| 35 | 55.08 | 1.33  | 6.20   | 3.60  | 8.88  | 1.80 |
| 35 | 54.93 | 1.50  | 6.20   | 2.90  | 7.61  | 1.80 |
| 35 | 54.66 | 1.48  | 6.10   | 3.10  | 6.34  | 1.80 |
| 35 | 54.33 | 1.50  | 7.30   | 3.20  | 6.41  | 1.80 |
| 35 | 54.33 | 1.13  | 7.30   | 3.20  | 11.84 | 1.80 |
| 35 | 54.33 | 0.77  | 13.70  | 3.90  | 13.81 | 1.80 |
| 35 | 54.17 | 0.40  | 22.50  | 5.30  | 9.58  | 1.80 |

|    |       |      |        |       |       |      |
|----|-------|------|--------|-------|-------|------|
| 35 | 53.92 | 0.40 | 42.90  | 7.00  | 7.68  | 1.80 |
| 35 | 53.74 | 0.71 | 33.80  | 6.10  | 12.82 | 1.80 |
| 35 | 53.58 | 1.08 | 35.10  | 5.80  | 11.63 | 1.80 |
| 35 | 53.66 | 0.40 | 44.90  | 7.10  | 9.16  | 1.80 |
| 35 | 53.50 | 0.40 | 69.00  | 11.10 | 8.03  | 1.80 |
| 35 | 53.51 | 0.68 | 83.40  | 10.00 | 11.98 | 1.80 |
| 35 | 53.34 | 0.50 | 51.70  | 10.40 | 21.98 | 1.80 |
| 35 | 53.17 | 0.52 | 58.30  | 10.50 | 16.49 | 1.80 |
| 35 | 53.21 | 0.77 | 81.30  | 12.60 | 22.05 | 1.80 |
| 35 | 53.02 | 1.06 | 67.20  | 11.30 | 12.05 | 1.80 |
| 35 | 52.67 | 2.83 | -999   | -999  | 23.11 | 1.80 |
| 35 | 52.61 | 4.00 | -999   | -999  | 29.38 | 1.80 |
| 35 | 52.62 | 4.33 | -999   | -999  | 15.29 | 1.80 |
| 35 | 52.62 | 3.77 | -999   | -999  | 30.44 | 1.80 |
| 35 | 52.46 | 3.70 | -999   | -999  | 15.36 | 1.80 |
| 35 | 52.35 | 3.26 | -999   | -999  | 11.34 | 1.80 |
| 35 | 52.24 | 2.83 | -999   | -999  | 10.29 | 1.80 |
| 35 | 52.17 | 2.33 | -999   | -999  | 9.65  | 1.80 |
| 35 | 52.09 | 1.84 | -999   | -999  | 12.68 | 1.80 |
| 35 | 51.78 | 1.78 | -999   | -999  | 15.99 | 1.80 |
| 35 | 51.50 | 1.74 | 190.70 | 20.70 | 13.46 | 1.80 |
| 35 | 51.18 | 1.57 | 129.50 | 23.80 | 15.64 | 1.80 |
| 35 | 51.05 | 1.84 | 71.20  | 24.50 | 19.37 | 1.80 |
| 35 | 51.46 | 2.67 | -999   | 3.70  | 25.50 | 1.80 |
| 35 | 51.74 | 2.99 | 12.60  | 3.30  | 21.49 | 1.80 |
| 35 | 51.83 | 3.36 | 18.70  | -999  | 20.71 | 1.80 |
| 35 | 52.15 | 3.51 | 10.80  | 3.70  | 10.36 | 1.80 |
| 35 | 52.22 | 3.87 | 37.90  | 3.70  | 9.72  | 1.80 |
| 35 | 52.35 | 4.01 | 32.00  | 3.70  | 15.99 | 1.80 |
| 35 | 52.62 | 3.76 | 8.50   | 2.50  | 21.42 | 1.80 |
| 35 | 52.78 | 3.62 | 11.00  | 5.70  | 13.10 | 1.80 |
| 35 | 53.00 | 3.43 | 8.30   | 3.20  | 15.99 | 1.80 |
| 35 | 53.20 | 3.26 | 7.40   | 2.90  | 19.37 | 1.80 |
| 35 | 53.50 | 3.01 | 5.90   | 2.70  | 20.01 | 1.80 |
| 35 | 53.41 | 3.46 | 6.10   | 2.60  | -999  | 1.80 |
| 35 | 53.30 | 4.00 | 5.20   | 2.80  | 14.44 | 1.80 |
| 35 | 53.22 | 4.33 | 4.60   | 1.60  | 15.99 | 1.80 |
| 35 | 53.65 | 4.84 | 4.60   | 4.70  | 11.20 | 1.80 |
| 35 | 53.92 | 4.83 | 7.60   | 2.10  | 7.40  | 1.80 |
| 35 | 54.25 | 4.84 | 7.30   | 4.80  | 16.63 | 1.80 |
| 35 | 54.58 | 4.83 | 5.50   | 2.20  | 7.68  | 1.80 |
| 35 | 54.31 | 5.24 | 5.60   | 2.20  | 8.31  | 1.80 |
| 35 | 54.05 | 5.67 | 3.60   | 1.80  | 8.24  | 1.80 |
| 35 | 53.94 | 5.84 | 7.10   | 2.40  | 9.51  | 1.80 |
| 35 | 53.65 | 6.17 | 10.00  | 4.70  | 13.32 | 1.80 |
| 35 | 53.72 | 6.50 | 13.00  | 3.90  | 12.82 | 1.80 |
| 35 | 53.91 | 6.42 | 6.30   | 2.50  | 12.54 | 1.80 |



|    |       |       |        |       |       |      |
|----|-------|-------|--------|-------|-------|------|
| 35 | 54.10 | 6.42  | 7.00   | 2.80  | 17.97 | 1.80 |
| 35 | 54.33 | 6.42  | 10.00  | 3.60  | 15.08 | 1.80 |
| 35 | 54.58 | 6.42  | 7.90   | 3.20  | 9.09  | 1.80 |
| 35 | 54.41 | 6.71  | 14.40  | 3.80  | 9.58  | 1.80 |
| 35 | 54.25 | 7.00  | 8.80   | 4.90  | 16.49 | 1.80 |
| 35 | 54.10 | 7.00  | 5.40   | 4.60  | 24.52 | 1.80 |
| 35 | 53.82 | 7.33  | 3.60   | 4.40  | 29.03 | 1.80 |
| 35 | 54.19 | 7.47  | 22.20  | 8.60  | 10.22 | 1.80 |
| 35 | 54.27 | 7.75  | 8.80   | 4.90  | 16.49 | 1.80 |
| 35 | 54.41 | 7.67  | 252.10 | 47.90 | 12.40 | 1.80 |
| 35 | 54.67 | 7.67  | 47.30  | 14.30 | 10.36 | 1.80 |
| 35 | 54.92 | 7.66  | 12.50  | 5.50  | 10.22 | 1.80 |
| 35 | 55.50 | 7.33  | 13.20  | 4.40  | 25.50 | 1.80 |
| 35 | 55.50 | 7.00  | 7.60   | 3.30  | 16.63 | 1.80 |
| 35 | 55.50 | 6.00  | 7.10   | 2.30  | 9.58  | 1.80 |
| 35 | 55.49 | 5.51  | 6.90   | 2.00  | 11.84 | 1.80 |
| 35 | 55.50 | 4.99  | 8.00   | 2.40  | 12.33 | 1.80 |
| 35 | 55.50 | 4.53  | 6.30   | 2.20  | 4.30  | 1.80 |
| 35 | 55.83 | 4.00  | 8.00   | 2.40  | 13.10 | 1.80 |
| 35 | 55.50 | 3.17  | -999   | -999  | 14.73 | 1.80 |
| 35 | 55.50 | 2.59  | 4.20   | 1.60  | 13.32 | 1.80 |
| 35 | 55.50 | 2.04  | 4.20   | 1.10  | 13.46 | 1.80 |
| 35 | 55.50 | 1.41  | 5.60   | 1.50  | -999  | 1.80 |
| 35 | 55.50 | 0.90  | 6.60   | 2.50  | 10.29 | 1.80 |
| 35 | 55.50 | 0.40  | 3.50   | 1.20  | 12.68 | 1.80 |
| 35 | 55.50 | -0.07 | 3.80   | 1.60  | 14.73 | 1.80 |
| 35 | 55.50 | -0.54 | 5.90   | 1.60  | 9.44  | 1.80 |
| 35 | 55.50 | -0.87 | 6.10   | 1.80  | 11.70 | 1.80 |
| 35 | 55.50 | -1.20 | 9.10   | 2.50  | 10.64 | 1.80 |
| 35 | 55.50 | -1.55 | 89.70  | 15.10 | 15.92 | 1.80 |
| 35 | 55.34 | -1.50 | 98.60  | 17.40 | 14.80 | 1.80 |
| 35 | 55.17 | -1.45 | 66.20  | 12.20 | 14.23 | 1.80 |
| 35 | 55.00 | -1.30 | 69.40  | 11.90 | 15.36 | 1.80 |
| 35 | 55.01 | -0.96 | 15.90  | 2.90  | -999  | 1.80 |
| 35 | 55.00 | -0.60 | 8.90   | 2.50  | -999  | 1.80 |
| 35 | 55.00 | -0.25 | 7.40   | 2.10  | -999  | 1.80 |
| 35 | 54.86 | -0.55 | 10.40  | 3.00  | 13.88 | 1.80 |
| 35 | 54.73 | -0.85 | 82.30  | 10.30 | 13.03 | 1.80 |
| 35 | 54.65 | -1.05 | 104.20 | 15.00 | -999  | 1.80 |
| 35 | 54.59 | -0.63 | 29.00  | 5.10  | 10.57 | 1.80 |
| 35 | 54.52 | -0.35 | 23.90  | 4.90  | 11.98 | 1.80 |
| 35 | 54.43 | 0.01  | 16.40  | 3.70  | 10.85 | 1.80 |
| 35 | 54.33 | 0.40  | 19.20  | 4.80  | 13.53 | 1.80 |
| 35 | 54.69 | 0.55  | 6.90   | 1.70  | 20.85 | 1.80 |
| 35 | 55.11 | 0.72  | 5.00   | 1.30  | 15.64 | 1.80 |
| 35 | 55.25 | 1.17  | 6.40   | 2.20  | 9.86  | 1.80 |
| 35 | 55.00 | 2.00  | 7.00   | 1.70  | 11.55 | 1.80 |

|    |       |      |        |       |       |      |
|----|-------|------|--------|-------|-------|------|
| 35 | 54.92 | 1.50 | 5.00   | 3.00  | 8.67  | 1.80 |
| 35 | 54.65 | 1.50 | 4.30   | 1.60  | 11.13 | 1.80 |
| 35 | 54.33 | 2.13 | 6.60   | 2.80  | 16.56 | 1.80 |
| 35 | 54.09 | 2.38 | 5.40   | 4.30  | 11.48 | 1.80 |
| 35 | 53.75 | 2.74 | 9.80   | 3.40  | -999  | 1.80 |
| 35 | 53.59 | 2.58 | 6.60   | 2.00  | 9.86  | 1.80 |
| 35 | 53.58 | 2.17 | 10.00  | 2.90  | 10.92 | 1.80 |
| 35 | 53.58 | 1.57 | 13.00  | 2.50  | 9.09  | 1.80 |
| 35 | 53.73 | 0.71 | 34.50  | 7.10  | 10.08 | 1.80 |
| 35 | 53.99 | 1.05 | 13.70  | 3.50  | 7.05  | 1.80 |
| 35 | 54.17 | 1.28 | 8.60   | 3.30  | 6.90  | 1.80 |
| 35 | 54.33 | 1.50 | 5.50   | 2.00  | 9.93  | 1.80 |
| 35 | 54.33 | 1.14 | 9.10   | 3.00  | 9.72  | 1.80 |
| 35 | 54.33 | 0.76 | 15.60  | 4.70  | 9.86  | 1.80 |
| 35 | 53.92 | 0.40 | 36.80  | 8.40  | -999  | 1.80 |
| 35 | 53.67 | 0.39 | 87.00  | 14.70 | 15.43 | 1.80 |
| 35 | 53.50 | 0.40 | 101.40 | 14.60 | 12.75 | 1.80 |
| 35 | 53.51 | 0.68 | 73.50  | 12.40 | 8.53  | 1.80 |
| 35 | 53.33 | 0.50 | 49.20  | 10.20 | 7.47  | 1.80 |
| 35 | 53.17 | 0.52 | 52.80  | 12.20 | 11.41 | 1.80 |
| 35 | 53.21 | 0.79 | 52.20  | 11.20 | 8.60  | 1.80 |
| 35 | 53.02 | 1.06 | 43.90  | 8.60  | 9.58  | 1.80 |
| 35 | 53.03 | 1.44 | 96.70  | 15.00 | 8.45  | 1.80 |
| 35 | 52.72 | 1.93 | 49.80  | 11.70 | 9.16  | 1.80 |
| 35 | 52.72 | 1.93 | 70.70  | 11.30 | 11.55 | 1.80 |
| 35 | 52.70 | 2.41 | 33.90  | 9.00  | 7.19  | 1.80 |
| 35 | 52.62 | 4.34 | 28.50  | 7.30  | 11.77 | 1.80 |
| 35 | 52.58 | 4.15 | 13.50  | 4.70  | 8.03  | 1.80 |
| 35 | 52.46 | 3.69 | 12.90  | 3.10  | 10.92 | 1.80 |
| 35 | 52.36 | 3.26 | 10.60  | 3.00  | 12.68 | 1.80 |
| 35 | 52.25 | 2.83 | 15.00  | 3.40  | 7.54  | 1.80 |
| 35 | 52.17 | 2.34 | 18.30  | 7.70  | 15.22 | 1.80 |
| 35 | 52.08 | 1.84 | 34.90  | 10.40 | 8.53  | 1.80 |
| 35 | 51.05 | 1.82 | 49.60  | 10.20 | 14.58 | 1.80 |
| 35 | 51.46 | 2.66 | 30.50  | 13.20 | 10.50 | 1.80 |
| 35 | 51.84 | 3.37 | 18.70  | 9.30  | 10.29 | 1.80 |
| 35 | 52.78 | 3.62 | 12.50  | 1.80  | 17.40 | 1.80 |
| 35 | 53.00 | 3.43 | 7.90   | 3.10  | 12.19 | 1.80 |
| 35 | 53.20 | 3.27 | 12.30  | 3.30  | 8.95  | 1.80 |
| 35 | 53.50 | 3.00 | 12.70  | 2.50  | 9.23  | 1.80 |
| 35 | 53.41 | 3.45 | 10.10  | 3.20  | 8.95  | 1.80 |
| 35 | 53.30 | 4.00 | 9.70   | 2.60  | 9.93  | 1.80 |
| 35 | 53.92 | 4.83 | 15.90  | 3.70  | 4.02  | 1.80 |
| 35 | 54.25 | 4.83 | 7.30   | 3.70  | 5.43  | 1.80 |
| 35 | 54.58 | 4.83 | 4.80   | 2.20  | 7.75  | 1.80 |
| 35 | 54.32 | 5.25 | 5.80   | 3.60  | 5.28  | 1.80 |
| 35 | 54.05 | 5.67 | 17.60  | 4.90  | 5.50  | 1.80 |

|    |       |       |       |       |       |      |
|----|-------|-------|-------|-------|-------|------|
| 35 | 53.94 | 5.83  | 21.90 | 5.90  | 8.95  | 1.80 |
| 35 | 53.83 | 6.00  | 16.70 | 6.50  | 10.85 | 1.80 |
| 35 | 54.58 | 6.42  | 9.20  | 3.50  | 10.08 | 1.80 |
| 35 | 54.42 | 6.71  | 8.50  | 4.80  | 5.28  | 1.80 |
| 35 | 54.25 | 7.00  | 11.00 | 10.60 | 2.75  | 1.80 |
| 35 | 54.10 | 7.00  | 13.50 | 11.10 | 3.66  | 1.80 |
| 35 | 54.01 | 7.23  | 15.20 | 8.10  | 7.05  | 1.80 |
| 35 | 53.83 | 7.34  | 15.70 | 7.30  | 7.89  | 1.80 |
| 35 | 54.19 | 7.47  | 13.80 | 10.10 | 3.10  | 1.80 |
| 35 | 54.27 | 7.75  | 34.70 | 15.90 | 6.13  | 1.80 |
| 35 | 55.50 | 7.34  | 8.10  | 4.10  | 6.98  | 1.80 |
| 35 | 55.50 | 7.00  | 4.20  | 3.30  | 5.92  | 1.80 |
| 35 | 55.50 | 6.50  | 8.70  | 3.20  | 8.31  | 1.80 |
| 35 | 55.50 | 6.00  | 9.10  | 2.50  | 5.14  | 1.80 |
| 35 | 55.50 | 5.51  | 5.40  | 1.90  | 10.00 | 1.80 |
| 35 | 55.01 | -1.30 | -999  | -999  | 9.30  | 1.80 |
| 35 | 55.00 | -0.95 | 31.70 | 7.30  | 22.40 | 1.80 |
| 35 | 55.00 | -0.60 | 10.30 | 2.20  | 22.40 | 1.80 |
| 35 | 54.86 | -0.55 | 7.10  | 2.50  | 19.30 | 1.80 |
| 35 | 54.73 | -0.85 | 11.20 | 4.90  | 19.73 | 1.80 |
| 35 | 54.65 | -1.05 | 82.70 | 22.80 | 11.34 | 1.80 |
| 35 | 54.59 | -0.62 | 13.50 | 5.00  | 17.90 | 1.80 |
| 35 | 55.00 | -0.25 | -999  | 1.30  | 18.46 | 1.80 |
| 35 | 55.50 | -1.55 | 70.90 | 17.20 | 13.53 | 1.80 |
| 35 | 55.49 | -1.19 | 47.50 | 7.00  | 10.92 | 1.80 |
| 35 | 55.50 | -0.87 | 11.60 | 2.20  | 13.18 | 1.80 |
| 35 | 55.50 | -0.53 | 6.80  | 1.60  | 13.39 | 1.80 |
| 35 | 55.50 | -0.07 | 5.50  | 1.40  | 9.86  | 1.80 |
| 35 | 55.50 | 1.42  | -999  | 1.60  | 11.84 | 1.80 |
| 35 | 55.25 | 1.17  | 14.20 | 2.50  | 13.39 | 1.80 |
| 35 | 55.09 | 1.33  | 10.20 | 2.50  | 15.64 | 1.80 |
| 35 | 54.93 | 1.50  | 10.90 | 1.90  | 7.54  | 1.80 |
| 35 | 54.65 | 1.50  | 11.40 | 2.30  | 3.95  | 1.80 |
| 35 | 54.33 | 2.12  | 9.80  | 3.60  | 6.13  | 1.80 |
| 35 | 54.33 | 1.51  | 10.00 | 4.20  | 5.14  | 1.80 |
| 35 | 53.92 | 0.39  | 17.80 | 4.80  | 26.21 | 1.80 |
| 35 | 53.67 | 0.40  | 40.40 | 9.70  | 11.06 | 1.80 |
| 35 | 53.50 | 0.40  | 69.00 | 10.00 | 9.65  | 1.80 |
| 35 | 53.33 | 0.50  | 27.90 | 9.10  | 3.95  | 1.80 |
| 35 | 53.17 | 0.52  | 52.80 | 11.20 | 5.85  | 1.80 |
| 35 | 53.21 | 0.78  | 55.40 | 12.10 | 5.78  | 1.80 |
| 35 | 53.01 | 1.45  | 67.90 | 12.80 | 5.78  | 1.80 |
| 35 | 52.72 | 1.93  | 22.20 | 6.00  | 5.43  | 1.80 |
| 35 | 52.69 | 2.41  | 18.10 | 8.10  | 6.06  | 1.80 |
| 35 | 52.67 | 2.83  | 21.10 | 5.30  | 13.03 | 1.80 |
| 35 | 52.62 | 3.75  | 8.60  | 2.60  | 9.02  | 1.80 |
| 35 | 52.61 | 4.00  | 7.70  | 2.40  | 10.57 | 1.80 |

|    |       |      |       |       |       |      |
|----|-------|------|-------|-------|-------|------|
| 35 | 52.62 | 4.33 | 9.00  | 4.60  | 7.96  | 1.80 |
| 35 | 52.47 | 3.70 | 7.50  | 3.00  | 11.48 | 1.80 |
| 35 | 52.36 | 3.27 | 12.00 | 3.90  | 11.34 | 1.80 |
| 35 | 52.25 | 2.83 | 19.00 | 6.00  | 10.22 | 1.80 |
| 35 | 52.17 | 2.33 | 15.90 | 6.60  | 5.85  | 1.80 |
| 35 | 52.09 | 1.84 | 36.60 | 21.80 | 3.31  | 1.80 |
| 35 | 51.78 | 1.78 | 23.20 | 10.20 | 4.79  | 1.80 |
| 35 | 51.50 | 1.75 | 29.80 | 8.20  | 5.28  | 1.80 |
| 35 | 51.18 | 1.57 | 28.10 | 5.20  | 5.35  | 1.80 |
| 35 | 51.47 | 2.67 | 36.90 | 27.20 | 10.92 | 1.80 |
| 35 | 51.76 | 3.00 | 25.40 | 10.30 | 9.44  | 1.80 |
| 35 | 51.83 | 3.37 | 16.50 | 6.20  | 8.60  | 1.80 |
| 35 | 52.13 | 3.50 | 8.70  | 4.40  | 8.74  | 1.80 |
| 35 | 52.22 | 3.87 | 15.20 | 6.30  | 6.90  | 1.80 |
| 35 | 52.35 | 4.00 | 21.30 | 7.90  | 7.82  | 1.80 |
| 35 | 52.62 | 3.77 | 4.60  | 2.40  | 9.30  | 1.80 |
| 35 | 52.78 | 3.62 | 7.10  | 2.20  | 10.22 | 1.80 |
| 35 | 53.00 | 3.43 | 6.00  | 1.40  | 8.88  | 1.80 |
| 35 | 53.49 | 3.01 | 7.30  | 1.90  | 7.40  | 1.80 |
| 35 | 53.41 | 3.45 | 12.80 | 2.40  | 6.76  | 1.80 |
| 35 | 53.30 | 4.00 | 9.50  | 2.10  | 11.41 | 1.80 |
| 35 | 53.22 | 4.33 | 11.50 | 2.40  | 7.89  | 1.80 |
| 35 | 53.16 | 4.62 | 10.90 | 4.30  | 8.24  | 1.80 |
| 35 | 53.65 | 4.83 | 12.90 | 2.40  | 8.88  | 1.80 |
| 35 | 53.92 | 4.83 | 5.40  | 2.90  | 5.71  | 1.80 |
| 35 | 54.25 | 4.83 | 9.10  | 3.50  | 5.57  | 1.80 |
| 35 | 54.58 | 4.83 | 4.40  | 2.80  | 17.47 | 1.80 |
| 35 | 54.32 | 5.25 | 4.70  | 2.70  | 7.26  | 1.80 |
| 35 | 54.05 | 5.66 | 10.30 | 3.10  | 8.45  | 1.80 |
| 35 | 53.94 | 5.83 | 10.90 | 4.10  | 3.59  | 1.80 |
| 35 | 53.83 | 6.00 | 8.50  | 4.00  | 4.23  | 1.80 |
| 35 | 53.65 | 6.17 | 9.40  | 5.40  | 5.50  | 1.80 |
| 35 | 53.72 | 6.50 | 8.20  | 3.60  | 17.40 | 1.80 |
| 35 | 53.92 | 6.41 | 8.10  | 3.90  | 9.16  | 1.80 |
| 35 | 54.10 | 6.41 | 10.10 | 3.90  | 8.03  | 1.80 |
| 35 | 54.33 | 6.41 | 11.40 | 4.10  | 5.57  | 1.80 |
| 35 | 54.25 | 7.00 | 7.90  | 5.60  | 5.92  | 1.80 |
| 35 | 54.10 | 7.00 | 9.50  | 4.80  | 7.61  | 1.80 |
| 35 | 53.83 | 7.33 | 19.40 | 10.20 | 10.08 | 1.80 |
| 35 | 54.01 | 7.23 | 12.40 | 6.60  | 8.53  | 1.80 |
| 35 | 54.18 | 7.46 | 15.50 | 7.80  | 7.33  | 1.80 |
| 35 | 54.27 | 7.75 | 18.20 | 14.70 | 4.44  | 1.80 |
| 35 | 54.42 | 7.67 | 9.30  | 17.80 | 5.50  | 1.80 |
| 35 | 54.67 | 7.67 | 7.20  | 7.80  | 3.88  | 1.80 |
| 35 | 54.91 | 7.67 | 9.20  | 6.70  | 3.95  | 1.80 |
| 35 | 55.17 | 7.66 | 7.20  | 8.80  | 2.89  | 1.80 |
| 35 | 55.45 | 7.67 | 4.40  | 6.80  | 3.17  | 1.80 |

|    |       |       |       |       |       |      |
|----|-------|-------|-------|-------|-------|------|
| 35 | 55.50 | 7.34  | 7.90  | 12.40 | 4.79  | 1.80 |
| 35 | 55.50 | 7.00  | 4.90  | 6.60  | 6.13  | 1.80 |
| 35 | 55.50 | 6.00  | 3.80  | 2.10  | 13.95 | 1.80 |
| 35 | 55.50 | 5.50  | 4.70  | 2.20  | 15.92 | 1.80 |
| 35 | 55.50 | 4.99  | 5.10  | 2.30  | 27.05 | 1.80 |
| 35 | 55.50 | 4.51  | 4.10  | 1.80  | 14.65 | 1.80 |
| 35 | 55.50 | 3.73  | 4.80  | 1.60  | 11.91 | 1.80 |
| 35 | 55.50 | 3.17  | 4.30  | 2.60  | 9.02  | 1.80 |
| 35 | 55.50 | 2.03  | 5.30  | 1.70  | 14.44 | 1.80 |
| 35 | 55.50 | 1.42  | 4.60  | 2.10  | 7.89  | 1.80 |
| 35 | 55.50 | 0.92  | 4.40  | 3.00  | 12.47 | 1.80 |
| 35 | 55.50 | 0.40  | 4.00  | -999  | 10.36 | 1.80 |
| 35 | 55.50 | -0.07 | 5.10  | 2.00  | 10.43 | 1.80 |
| 35 | 55.50 | -0.53 | 5.50  | 2.40  | 10.85 | 1.80 |
| 35 | 55.50 | -0.87 | 6.30  | 2.60  | 10.99 | 1.80 |
| 35 | 55.50 | -1.20 | 6.80  | 3.20  | 11.48 | 1.80 |
| 35 | 55.50 | -1.55 | 42.60 | 11.00 | 12.05 | 1.80 |
| 35 | 55.35 | -1.49 | 58.20 | 11.70 | 9.86  | 1.80 |
| 35 | 55.00 | -1.30 | 63.10 | 11.30 | 10.36 | 1.80 |
| 35 | 55.00 | -0.95 | 15.40 | 5.80  | 10.85 | 1.80 |
| 35 | 55.00 | -0.60 | 7.60  | 3.20  | 13.67 | 1.80 |
| 35 | 55.00 | -0.25 | 5.30  | 3.00  | 13.18 | 1.80 |
| 35 | 54.86 | -0.55 | 9.70  | 4.70  | 14.58 | 1.80 |
| 35 | 54.73 | -0.85 | 12.10 | 6.70  | 8.24  | 1.80 |
| 35 | 54.65 | -1.05 | 59.50 | 10.60 | 7.40  | 1.80 |
| 35 | 54.57 | -0.62 | 22.60 | 8.70  | 7.61  | 1.80 |
| 35 | 54.52 | -0.35 | 16.30 | 8.10  | 7.26  | 1.80 |
| 35 | 54.43 | 0.00  | 9.10  | 4.80  | 10.22 | 1.80 |
| 35 | 54.33 | 0.41  | 5.90  | 3.60  | 5.50  | 1.80 |
| 35 | 54.69 | 0.55  | 6.30  | 3.10  | 13.39 | 1.80 |
| 35 | 55.10 | 0.73  | 3.60  | 2.50  | 9.16  | 1.80 |
| 35 | 55.25 | 1.17  | 4.70  | 2.40  | 11.55 | 1.80 |
| 35 | 55.08 | 1.33  | 2.10  | 2.90  | 10.22 | 1.80 |
| 35 | 54.93 | 1.50  | 3.80  | 2.20  | 14.37 | 1.80 |
| 35 | 54.65 | 1.50  | 4.30  | 2.50  | 12.47 | 1.80 |
| 35 | 54.33 | 1.50  | 6.40  | 3.10  | 6.20  | 1.80 |
| 35 | 54.33 | 1.13  | 3.90  | 3.00  | 5.28  | 1.80 |
| 35 | 54.17 | 1.29  | 3.40  | 2.50  | 4.93  | 1.80 |
| 35 | 54.00 | 1.06  | 3.40  | 3.00  | 5.21  | 1.80 |
| 35 | 54.34 | 0.76  | 4.20  | 2.80  | 7.05  | 1.80 |
| 35 | 54.17 | 0.40  | 6.80  | 4.30  | 8.17  | 1.80 |
| 35 | 53.92 | 0.40  | 8.20  | 4.70  | 7.40  | 1.80 |
| 35 | 53.73 | 0.72  | 13.40 | 4.50  | 7.05  | 1.80 |
| 35 | 53.58 | 1.08  | 7.60  | 3.60  | 6.41  | 1.80 |
| 35 | 53.67 | 0.40  | 8.90  | 3.70  | 6.62  | 1.80 |
| 35 | 53.52 | 0.41  | 23.30 | 6.90  | 5.78  | 1.80 |
| 35 | 53.33 | 0.50  | 14.80 | 4.30  | 7.61  | 1.80 |

|    |       |      |       |       |       |      |
|----|-------|------|-------|-------|-------|------|
| 35 | 53.17 | 0.52 | 16.70 | 5.60  | 4.44  | 1.80 |
| 35 | 53.22 | 0.78 | 24.30 | 5.90  | 6.34  | 1.80 |
| 35 | 53.02 | 1.07 | 24.30 | 6.20  | 5.35  | 1.80 |
| 35 | 53.02 | 1.45 | 31.90 | 7.40  | 6.98  | 1.80 |
| 35 | 52.67 | 2.83 | 16.60 | 5.90  | 8.95  | 1.80 |
| 35 | 52.62 | 4.00 | 10.70 | 3.30  | -999  | 1.80 |
| 35 | 52.62 | 4.33 | 19.60 | 5.80  | 16.63 | 1.80 |
| 35 | 52.58 | 4.15 | 10.70 | 3.00  | 12.40 | 1.80 |
| 35 | 52.62 | 3.77 | 9.40  | 3.00  | 12.40 | 1.80 |
| 35 | 52.47 | 3.70 | 7.70  | 3.20  | 12.33 | 1.80 |
| 35 | 52.36 | 3.27 | 16.00 | 4.20  | 13.95 | 1.80 |
| 35 | 52.25 | 2.83 | 11.30 | 4.50  | 11.41 | 1.80 |
| 35 | 52.09 | 1.84 | 22.60 | 9.30  | 5.21  | 1.80 |
| 35 | 51.79 | 1.79 | 24.70 | 10.90 | 8.95  | 1.80 |
| 35 | 51.50 | 1.75 | 7.90  | 5.40  | 8.60  | 1.80 |
| 35 | 51.18 | 1.56 | 10.70 | 4.40  | 8.31  | 1.80 |
| 35 | 51.05 | 1.83 | 8.50  | 5.30  | 9.02  | 1.80 |
| 35 | 51.47 | 2.67 | 18.80 | 7.50  | 14.58 | 1.80 |
| 35 | 51.75 | 3.00 | 15.10 | 6.40  | 13.81 | 1.80 |
| 35 | 51.83 | 3.37 | 11.20 | 5.50  | 12.26 | 1.80 |
| 35 | 52.13 | 3.50 | 10.60 | 4.10  | 11.91 | 1.80 |
| 35 | 52.22 | 3.87 | 5.30  | 3.20  | 15.22 | 1.80 |
| 35 | 52.35 | 4.00 | 9.10  | 3.80  | 15.01 | 1.80 |
| 35 | 52.62 | 3.77 | 12.70 | 2.80  | 16.91 | 1.80 |
| 35 | 52.78 | 3.62 | 4.00  | 2.60  | 8.67  | 1.80 |
| 35 | 53.00 | 3.43 | 5.20  | 2.60  | 9.09  | 1.80 |
| 35 | 53.20 | 3.27 | 5.40  | 2.50  | 12.54 | 1.80 |
| 35 | 53.50 | 3.00 | 3.80  | 2.30  | 11.41 | 1.80 |
| 35 | 53.41 | 3.45 | 10.70 | 3.40  | 6.76  | 1.80 |
| 35 | 53.30 | 4.00 | 8.30  | 1.90  | 6.76  | 1.80 |
| 35 | 53.23 | 4.34 | 4.40  | 1.50  | 10.43 | 1.80 |
| 35 | 53.17 | 4.61 | 7.30  | 4.10  | 12.47 | 1.80 |
| 35 | 53.92 | 4.83 | 8.90  | 3.70  | 8.17  | 1.80 |
| 35 | 54.32 | 5.24 | 9.90  | 5.20  | 6.13  | 1.80 |
| 35 | 54.05 | 5.67 | 8.50  | 3.20  | 8.95  | 1.80 |
| 35 | 53.83 | 6.01 | 15.40 | 4.40  | 14.51 | 1.80 |
| 35 | 53.65 | 6.17 | 14.80 | 5.60  | 12.40 | 1.80 |
| 35 | 53.72 | 6.50 | 12.20 | 4.70  | 13.32 | 1.80 |
| 35 | 53.92 | 6.41 | 9.90  | 3.50  | 13.25 | 1.80 |
| 35 | 54.10 | 6.42 | 7.20  | 3.30  | 10.71 | 1.80 |
| 35 | 54.58 | 6.42 | 3.20  | 5.80  | 7.12  | 1.80 |
| 35 | 54.42 | 6.71 | 6.70  | 4.50  | 10.64 | 1.80 |
| 35 | 54.25 | 7.00 | 9.20  | 5.30  | 12.26 | 1.80 |
| 35 | 54.10 | 7.00 | 6.40  | 5.60  | 10.15 | 1.80 |
| 35 | 53.82 | 7.33 | 10.50 | 8.10  | 9.44  | 1.80 |
| 35 | 54.19 | 7.47 | 14.60 | 4.90  | 8.10  | 1.80 |
| 35 | 54.27 | 7.75 | 11.80 | 6.10  | 7.96  | 1.80 |

|    |       |       |        |       |       |      |
|----|-------|-------|--------|-------|-------|------|
| 35 | 54.42 | 7.67  | 15.20  | 7.40  | 15.64 | 1.80 |
| 35 | 54.67 | 7.67  | 19.80  | 7.90  | 9.93  | 1.80 |
| 35 | 54.92 | 7.67  | 11.40  | 6.00  | 9.23  | 1.80 |
| 35 | 55.17 | 7.67  | 9.30   | 4.30  | 8.60  | 1.80 |
| 35 | 55.45 | 7.67  | 23.20  | 7.50  | 14.58 | 1.80 |
| 35 | 55.50 | 7.33  | 9.10   | 3.70  | 12.89 | 1.80 |
| 35 | 55.50 | 6.50  | 7.00   | 3.80  | 7.47  | 1.80 |
| 35 | 55.50 | 6.00  | 4.80   | 2.10  | 5.92  | 1.80 |
| 35 | 55.54 | 5.45  | 5.20   | 1.80  | 7.19  | 1.80 |
| 35 | 55.50 | 4.99  | 5.30   | 2.20  | 9.30  | 1.80 |
| 35 | 55.50 | 4.51  | 4.90   | 2.30  | 7.47  | 1.80 |
| 35 | 55.50 | 3.75  | 3.60   | 1.80  | 9.23  | 1.80 |
| 35 | 55.50 | 3.17  | 4.10   | 2.10  | 6.55  | 1.80 |
| 35 | 55.50 | 2.59  | 4.80   | 2.10  | 6.98  | 1.80 |
| 35 | 55.50 | 2.03  | 4.40   | 2.10  | 6.98  | 1.80 |
| 35 | 55.50 | 1.41  | 3.90   | 2.00  | 5.78  | 1.80 |
| 35 | 55.50 | 0.90  | 4.40   | 2.10  | 6.48  | 1.80 |
| 35 | 55.50 | 0.40  | 5.30   | 2.40  | 7.61  | 1.80 |
| 35 | 55.50 | -0.07 | 5.50   | 3.00  | 10.15 | 1.80 |
| 35 | 55.50 | -0.53 | 4.90   | 2.60  | 9.86  | 1.80 |
| 35 | 55.50 | -0.87 | 5.90   | 2.90  | 5.28  | 1.80 |
| 35 | 55.50 | -1.20 | 4.50   | 2.50  | 7.89  | 1.80 |
| 35 | 55.50 | -1.55 | 58.20  | 13.60 | 8.17  | 1.80 |
| 35 | 55.34 | -1.50 | 60.50  | 13.30 | 9.30  | 1.80 |
| 35 | 55.17 | -1.45 | 110.40 | 13.10 | 7.75  | 1.80 |
| 35 | 55.00 | -1.30 | 82.50  | 14.30 | 7.89  | 1.80 |
| 35 | 55.00 | -0.95 | 32.60  | 7.90  | 5.21  | 1.80 |
| 35 | 55.00 | -0.60 | 17.40  | 5.30  | 5.35  | 1.80 |
| 35 | 55.00 | -0.25 | 6.80   | 3.10  | 9.23  | 1.80 |
| 35 | 54.87 | -0.55 | 8.70   | 4.30  | 6.48  | 1.80 |
| 35 | 54.73 | -0.85 | 19.00  | 7.10  | 7.33  | 1.80 |
| 35 | 54.65 | -1.06 | 95.40  | 16.60 | 14.44 | 1.80 |
| 35 | 54.65 | -0.89 | 28.10  | 7.80  | 7.82  | 1.80 |
| 35 | 54.58 | -0.62 | 34.30  | 10.10 | 6.98  | 1.80 |
| 35 | 54.52 | -0.35 | 23.70  | 10.00 | 7.96  | 1.80 |
| 35 | 54.43 | 0.00  | 13.80  | 7.40  | 6.34  | 1.80 |
| 35 | 54.34 | 0.40  | 15.30  | 7.70  | 5.21  | 1.80 |
| 35 | 54.68 | 0.54  | 11.60  | 5.30  | 5.50  | 1.80 |
| 35 | 55.10 | 0.73  | 5.50   | 2.70  | 4.79  | 1.80 |
| 35 | 55.25 | 1.17  | 5.10   | 2.50  | 5.28  | 1.80 |
| 35 | 55.08 | 1.33  | 4.30   | 2.30  | 4.93  | 1.80 |
| 35 | 54.92 | 1.50  | 5.30   | 2.60  | 6.76  | 1.80 |
| 35 | 54.65 | 1.50  | 5.20   | 2.60  | 5.35  | 1.80 |
| 35 | 54.33 | 2.13  | 4.50   | 2.00  | 4.72  | 1.80 |
| 35 | 54.33 | 1.50  | 11.90  | 3.30  | 5.64  | 1.80 |
| 35 | 54.33 | 1.13  | 7.40   | 3.20  | 4.58  | 1.80 |
| 35 | 54.17 | 1.28  | 6.70   | 2.80  | 4.30  | 1.80 |

|    |       |        |        |      |       |      |
|----|-------|--------|--------|------|-------|------|
| 35 | 54.00 | 1.06   | 4.60   | 2.80 | 4.30  | 1.80 |
| 35 | 54.33 | 0.76   | 9.00   | 3.70 | 5.07  | 1.80 |
| 35 | 54.17 | 0.39   | 11.80  | 6.10 | 5.21  | 1.80 |
| 35 | 53.92 | 0.40   | 10.50  | 3.60 | 3.80  | 1.80 |
| 35 | 53.73 | 0.72   | 103.30 | 3.60 | 5.85  | 1.80 |
| 35 | 53.58 | 1.09   | 17.80  | 4.50 | 5.00  | 1.80 |
| 35 | 53.67 | 0.40   | 22.80  | 5.20 | 6.83  | 1.80 |
| 35 | 53.50 | 0.40   | 24.90  | 5.50 | 5.85  | 1.80 |
| 35 | 53.52 | 0.69   | 34.10  | 8.30 | 4.79  | 1.80 |
| 35 | 53.33 | 0.50   | 17.40  | 3.70 | -999  | 1.80 |
| 35 | 53.16 | 0.51   | 21.50  | 4.50 | 72.07 | 1.80 |
| 35 | 53.22 | 0.79   | 15.00  | 4.80 | 2.75  | 1.80 |
| 35 | 53.02 | 1.07   | 13.80  | 4.70 | 3.31  | 1.80 |
| 35 | 53.02 | 1.45   | 19.20  | 5.10 | 1.69  | 1.80 |
| 36 | 28.15 | -15.35 | 28.68  | -999 | 2.72  | 8.00 |
| 36 | 27.84 | -15.30 | 25.33  | -999 | 3.40  | 8.00 |
| 36 | 27.53 | -15.59 | 9.64   | -999 | 4.60  | 8.00 |
| 36 | 24.83 | -17.83 | 3.12   | -999 | 1.75  | 8.00 |
| 36 | 24.37 | -18.20 | 2.91   | -999 | 2.33  | 8.00 |
| 36 | 23.90 | -18.59 | 3.29   | -999 | 1.88  | 8.00 |
| 36 | 23.42 | -18.99 | 2.21   | -999 | 1.91  | 8.00 |
| 36 | 22.77 | -19.52 | 2.60   | -999 | 3.10  | 8.00 |
| 36 | 21.28 | -20.72 | 1.27   | -999 | 1.80  | 8.00 |
| 36 | 20.91 | -20.65 | 4.17   | -999 | 3.27  | 8.00 |
| 36 | 20.21 | -20.52 | 5.12   | -999 | 2.84  | 8.00 |
| 36 | 16.76 | -19.90 | 3.60   | -999 | 3.80  | 8.00 |
| 36 | 16.12 | -19.79 | 2.77   | -999 | 5.52  | 8.00 |
| 36 | 15.39 | -19.66 | 2.30   | -999 | 6.37  | 8.00 |
| 36 | 14.67 | -19.54 | 2.69   | -999 | 4.59  | 8.00 |
| 36 | 13.98 | -19.41 | 1.60   | -999 | 5.07  | 8.00 |
| 36 | 11.25 | -18.79 | 2.02   | -999 | 6.97  | 8.00 |
| 36 | 10.61 | -18.64 | 2.49   | -999 | 6.75  | 8.00 |
| 36 | 9.95  | -18.46 | 2.10   | -999 | 9.48  | 8.00 |
| 36 | 6.57  | -15.73 | 4.25   | -999 | 5.85  | 8.00 |
| 36 | 6.25  | -15.47 | 1.97   | -999 | 7.27  | 8.00 |
| 36 | 5.50  | -14.87 | 1.85   | -999 | 10.35 | 8.00 |
| 36 | 5.12  | -14.57 | 2.04   | -999 | 10.50 | 8.00 |
| 36 | 4.93  | -14.42 | 2.14   | -999 | 6.06  | 8.00 |
| 36 | 4.17  | -13.81 | 1.95   | -999 | 10.33 | 8.00 |
| 36 | 2.06  | -12.12 | 2.17   | -999 | 7.32  | 8.00 |
| 36 | 1.57  | -11.72 | 2.85   | -999 | 7.85  | 8.00 |
| 36 | 1.00  | -11.27 | 2.56   | -999 | 4.40  | 8.00 |
| 36 | 0.45  | -10.83 | 4.11   | -999 | 4.67  | 8.00 |
| 36 | -0.30 | -10.23 | 6.44   | -999 | 4.23  | 8.00 |
| 36 | -2.16 | -8.74  | 6.08   | -999 | 4.27  | 8.00 |
| 36 | -2.28 | -8.65  | 5.54   | -999 | 2.86  | 8.00 |
| 36 | -2.78 | -8.25  | 2.04   | -999 | 3.16  | 8.00 |



|       |        |       |      |      |      |      |
|-------|--------|-------|------|------|------|------|
| 36    | -3.30  | -7.83 | 3.79 | -999 | 3.84 | 8.00 |
| 36    | -4.18  | -7.13 | 5.90 | -999 | 4.49 | 8.00 |
| 36    | -6.51  | -5.26 | 4.72 | -999 | 4.32 | 8.00 |
| 36    | -7.01  | -4.86 | 4.78 | -999 | 2.78 | 8.00 |
| 36    | -10.85 | -1.75 | 1.92 | -999 | 3.42 | 8.00 |
| 36    | -11.38 | -1.32 | 1.99 | -999 | 5.16 | 8.00 |
| 36    | -11.88 | -0.93 | 3.03 | -999 | 5.61 | 8.00 |
| 36    | -12.41 | -0.48 | 1.40 | -999 | 3.57 | 8.00 |
| 36    | -12.94 | -0.04 | 1.66 | -999 | 3.04 | 8.00 |
| 36    | -15.09 | 1.72  | 2.76 | -999 | 3.36 | 8.00 |
| 36    | -15.57 | 2.12  | 2.44 | -999 | 5.22 | 8.00 |
| 36    | -16.08 | 2.54  | 2.57 | -999 | 4.84 | 8.00 |
| 36    | -16.60 | 2.98  | 2.53 | -999 | 3.65 | 8.00 |
| 36    | -16.94 | 3.26  | 2.90 | -999 | 4.47 | 8.00 |
| 36    | -19.11 | 5.09  | 2.87 | -999 | 3.70 | 8.00 |
| 36    | -19.54 | 5.45  | 2.77 | -999 | 3.86 | 8.00 |
| 36    | -20.02 | 5.85  | 1.60 | -999 | 4.28 | 8.00 |
| 36    | -20.48 | 6.25  | 2.67 | -999 | 3.51 | 8.00 |
| 36    | -20.95 | 6.65  | 2.84 | -999 | 3.40 | 8.00 |
| 36    | -22.79 | 8.23  | 1.46 | -999 | 4.52 | 8.00 |
| 36    | -23.19 | 8.58  | 2.36 | -999 | 4.20 | 8.00 |
| 36    | -23.96 | 9.25  | 2.21 | -999 | 3.25 | 8.00 |
| <hr/> |        |       |      |      |      |      |
| 37    | -36.03 | 19.24 | 4.24 | -999 | 3.50 | 8.00 |
| 37    | -36.59 | 19.57 | 2.47 | -999 | 4.81 | 8.00 |
| 37    | -38.98 | 21.34 | 3.20 | -999 | 3.25 | 8.00 |
| 37    | -39.45 | 21.34 | 1.71 | -999 | 2.80 | 8.00 |
| 37    | -39.96 | 21.31 | 2.11 | -999 | 2.71 | 8.00 |
| 37    | -40.54 | 21.17 | 2.28 | -999 | 3.33 | 8.00 |
| 37    | -41.01 | 21.05 | 2.56 | -999 | 4.08 | 8.00 |
| 37    | -43.49 | 20.40 | 2.26 | -999 | 2.16 | 8.00 |
| 37    | -44.02 | 20.26 | 1.53 | -999 | 1.27 | 8.00 |
| 37    | -44.75 | 20.07 | 2.08 | -999 | 0.25 | 8.00 |
| 37    | -45.00 | 20.00 | 2.42 | -999 | 0.90 | 8.00 |
| 37    | -45.96 | 20.00 | 1.54 | -999 | 0.98 | 8.00 |
| 37    | -46.05 | 20.00 | 2.17 | -999 | 0.71 | 8.00 |
| 37    | -46.31 | 20.00 | 2.82 | -999 | 1.38 | 8.00 |
| 37    | -47.02 | 20.00 | 3.05 | -999 | 1.02 | 8.00 |
| 37    | -47.51 | 20.00 | 3.89 | -999 | 1.20 | 8.00 |
| 37    | -47.95 | 20.00 | 4.68 | -999 | 0.91 | 8.00 |
| 37    | -48.42 | 20.00 | 3.83 | -999 | 1.15 | 8.00 |
| 37    | -48.88 | 20.00 | 3.79 | -999 | 0.98 | 8.00 |
| 37    | -49.29 | 20.01 | 2.99 | -999 | 1.30 | 8.00 |
| 37    | -49.35 | 20.00 | 4.37 | -999 | 0.74 | 8.00 |
| 37    | -49.82 | 20.00 | 3.20 | -999 | 0.62 | 8.00 |
| 37    | -52.00 | 20.00 | 3.31 | -999 | 0.51 | 8.00 |
| 37    | -50.54 | 20.00 | 3.84 | -999 | 0.74 | 8.00 |
| 37    | -50.05 | 20.00 | 3.00 | -999 | 0.93 | 8.00 |

|    |        |        |      |      |      |         |
|----|--------|--------|------|------|------|---------|
| 37 | -49.61 | 20.00  | 2.85 | -999 | 1.06 | 8.00    |
| 38 | 43.41  | -57.48 | -999 | -999 | 1.51 | 10.00   |
| 38 | 43.41  | -57.48 | -999 | -999 | 1.40 | 5.00    |
| 38 | 43.41  | -57.48 | -999 | -999 | 1.58 | 5.00    |
| 38 | 43.50  | -57.45 | -999 | -999 | 1.47 | 10.00   |
| 38 | 43.50  | -57.45 | -999 | -999 | 1.36 | 5.00    |
| 38 | 43.60  | -57.44 | -999 | -999 | 1.09 | 10.00   |
| 38 | 43.60  | -57.44 | -999 | -999 | 1.01 | 5.00    |
| 38 | 43.60  | -57.44 | -999 | -999 | 1.25 | 5.00    |
| 38 | 43.68  | -57.46 | -999 | -999 | 1.20 | 10.00   |
| 38 | 43.68  | -57.46 | -999 | -999 | 1.15 | 5.00    |
| 38 | 43.78  | -57.70 | -999 | -999 | 1.57 | 10.00   |
| 38 | 43.78  | -57.70 | -999 | -999 | 1.59 | 5.00    |
| 38 | 43.78  | -57.70 | -999 | -999 | 1.60 | 5.00    |
| 38 | 39.00  | -57.46 | -999 | -999 | 2.63 | 10.00   |
| 38 | 36.84  | -54.38 | -999 | -999 | 3.54 | 10.00   |
| 38 | 36.84  | -54.38 | -999 | -999 | 3.58 | 5.00    |
| 38 | 36.84  | -54.38 | -999 | -999 | 3.58 | 5.00    |
| 38 | 36.93  | -54.42 | -999 | -999 | 3.72 | 10.00   |
| 38 | 36.93  | -54.42 | -999 | -999 | 3.55 | 5.00    |
| 38 | 36.93  | -54.42 | -999 | -999 | 3.78 | -999.00 |
| 38 | 42.32  | -45.01 | -999 | -999 | 1.44 | 10.00   |
| 38 | 42.32  | -45.01 | -999 | -999 | 1.39 | 5.00    |
| 38 | 42.32  | -45.01 | -999 | -999 | 1.45 | 5.00    |
| 38 | 46.49  | -45.01 | -999 | -999 | 0.85 | 10.00   |
| 38 | 46.49  | -45.01 | -999 | -999 | 0.85 | 5.00    |
| 38 | 46.49  | -45.01 | -999 | -999 | 0.85 | 5.00    |
| 38 | 50.66  | -44.99 | -999 | -999 | 0.61 | 10.00   |
| 38 | 50.67  | -45.00 | -999 | -999 | 0.72 | 5.00    |
| 38 | 50.67  | -45.00 | -999 | -999 | 0.62 | 5.00    |
| 38 | 54.83  | -44.99 | -999 | -999 | 0.60 | 10.00   |
| 38 | 54.83  | -44.99 | -999 | -999 | 0.52 | 5.00    |
| 38 | 43.40  | -57.67 | -999 | -999 | 3.26 | 10.00   |
| 38 | 43.40  | -57.67 | -999 | -999 | 3.23 | 10.00   |
| 38 | 43.40  | -57.67 | -999 | -999 | 3.36 | 10.00   |
| 38 | 43.40  | -57.67 | -999 | -999 | 3.41 | 10.00   |
| 38 | 43.40  | -57.67 | -999 | -999 | 3.44 | 10.00   |
| 38 | 43.40  | -57.67 | -999 | -999 | 3.34 | 10.00   |
| 38 | 43.40  | -57.67 | -999 | -999 | 3.33 | 10.00   |
| 38 | 43.40  | -57.67 | -999 | -999 | 3.42 | 10.00   |
| 38 | 43.37  | -57.71 | -999 | -999 | 3.60 | 10.00   |
| 38 | 43.37  | -57.71 | -999 | -999 | 3.56 | 5.00    |
| 38 | 43.35  | -57.73 | -999 | -999 | 4.14 | 10.00   |
| 38 | 43.35  | -57.73 | -999 | -999 | 3.64 | 5.00    |
| 38 | 43.35  | -57.73 | -999 | -999 | 3.54 | 5.00    |
| 38 | 43.80  | -57.50 | -999 | -999 | 1.11 | 4.00    |
| 38 | 42.80  | -57.50 | -999 | -999 | 2.37 | 4.00    |

|    |       |        |      |      |       |       |
|----|-------|--------|------|------|-------|-------|
| 38 | 42.50 | -57.50 | -999 | -999 | 2.41  | 4.00  |
| 38 | 42.10 | -57.50 | -999 | -999 | 3.24  | 4.00  |
| 38 | 39.20 | -57.50 | -999 | -999 | 3.01  | 4.00  |
| 38 | 37.20 | -54.10 | -999 | -999 | 5.77  | 4.00  |
| 38 | 38.10 | -52.50 | -999 | -999 | 3.41  | 4.00  |
| 38 | 38.40 | -52.00 | -999 | -999 | 3.42  | 4.00  |
| 38 | 38.70 | -51.40 | -999 | -999 | 3.12  | 4.00  |
| 38 | 38.90 | -51.00 | -999 | -999 | 2.86  | 4.00  |
| 38 | 39.20 | -50.50 | -999 | -999 | 3.14  | 4.00  |
| 38 | 39.60 | -49.90 | -999 | -999 | 3.58  | 4.00  |
| 38 | 40.00 | -49.20 | -999 | -999 | 3.07  | 4.00  |
| 38 | 40.30 | -48.60 | -999 | -999 | 3.11  | 4.00  |
| 38 | 40.40 | -48.50 | -999 | -999 | 3.40  | 4.00  |
| 38 | 44.00 | -45.00 | -999 | -999 | 1.53  | 4.00  |
| 38 | 44.40 | -45.00 | -999 | -999 | 2.15  | 4.00  |
| 38 | 47.10 | -45.00 | -999 | -999 | 1.01  | 4.00  |
| 38 | 47.80 | -45.00 | -999 | -999 | 1.01  | 4.00  |
| 38 | 48.20 | -45.00 | -999 | -999 | 0.79  | 4.00  |
| 38 | 51.30 | -45.00 | -999 | -999 | 0.92  | 4.00  |
| 38 | 51.90 | -45.00 | -999 | -999 | 0.88  | 4.00  |
| 38 | 54.20 | -45.00 | -999 | -999 | 0.50  | 4.00  |
| 38 | 53.70 | -45.00 | -999 | -999 | 0.62  | 4.00  |
| 38 | 52.80 | -45.00 | -999 | -999 | 0.71  | 4.00  |
| 38 | 50.20 | -45.50 | -999 | -999 | 1.08  | 4.00  |
| 38 | 49.80 | -46.50 | -999 | -999 | 1.06  | 4.00  |
| 38 | 49.20 | -47.50 | -999 | -999 | 0.62  | 4.00  |
| 38 | 47.40 | -50.90 | -999 | -999 | 1.62  | 4.00  |
| 38 | 47.90 | -51.40 | -999 | -999 | 1.70  | 4.00  |
| 38 | 46.70 | -52.00 | -999 | -999 | 1.66  | 4.00  |
| 38 | 46.50 | -52.40 | -999 | -999 | 1.43  | 4.00  |
| 38 | 46.20 | -52.90 | -999 | -999 | 1.50  | 4.00  |
| 38 | 45.80 | -53.50 | -999 | -999 | 2.84  | 4.00  |
| 39 | 43.43 | -57.66 | -999 | -999 | 15.02 | 8.00  |
| 39 | 43.43 | -57.66 | -999 | -999 | 18.47 | 8.00  |
| 39 | 43.43 | -57.66 | -999 | -999 | 11.30 | 1.00  |
| 39 | 43.43 | -57.66 | -999 | -999 | 11.36 | 1.00  |
| 39 | 43.43 | -57.66 | -999 | -999 | 11.46 | 1.00  |
| 39 | 43.43 | -57.66 | -999 | -999 | 12.40 | 1.00  |
| 39 | 43.51 | -57.31 | -999 | -999 | -999  | 10.00 |
| 39 | 43.51 | -57.31 | -999 | -999 | 14.17 | 5.00  |
| 39 | 39.00 | -57.48 | -999 | -999 | 5.09  | 1.00  |
| 39 | 36.81 | -54.70 | -999 | -999 | 7.12  | 1.00  |
| 39 | 36.66 | -57.60 | -999 | -999 | 6.50  | 1.00  |
| 39 | 36.66 | -57.60 | -999 | -999 | 6.63  | 1.00  |
| 39 | 39.88 | -49.24 | -999 | -999 | 4.79  | 1.00  |
| 39 | 39.88 | -49.24 | -999 | -999 | 4.89  | 1.00  |
| 39 | 42.34 | -45.01 | -999 | -999 | 6.48  | 1.00  |

|       |       |        |      |      |      |       |
|-------|-------|--------|------|------|------|-------|
| 39    | 42.43 | -44.92 | -999 | -999 | 5.20 | 1.00  |
| 39    | 42.43 | -44.92 | -999 | -999 | 5.34 | 1.00  |
| 39    | 46.50 | -45.03 | -999 | -999 | 7.26 | 10.00 |
| 39    | 46.50 | -45.03 | -999 | -999 | 7.25 | 6.00  |
| 39    | 46.50 | -45.03 | -999 | -999 | 7.01 | 1.00  |
| 39    | 46.50 | -45.03 | -999 | -999 | 7.04 | 1.00  |
| 39    | 46.50 | -45.03 | -999 | -999 | 7.23 | 1.00  |
| 39    | 50.66 | -44.97 | -999 | -999 | 4.39 | 7.00  |
| 39    | 50.66 | -44.97 | -999 | -999 | 3.23 | 1.00  |
| 39    | 50.66 | -44.97 | -999 | -999 | 3.83 | 1.00  |
| 39    | 50.75 | -44.75 | -999 | -999 | 3.74 | 1.00  |
| 39    | 54.86 | -45.00 | -999 | -999 | 3.37 | 1.00  |
| 39    | 54.86 | -45.02 | -999 | -999 | 3.54 | 1.00  |
| 39    | 54.86 | -45.02 | -999 | -999 | 3.58 | 1.00  |
| 39    | 54.86 | -45.02 | -999 | -999 | 3.60 | 1.00  |
| 39    | 54.86 | -45.02 | -999 | -999 | 3.61 | 1.00  |
| 39    | 54.86 | -45.02 | -999 | -999 | 3.61 | 1.00  |
| 39    | 54.86 | -45.02 | -999 | -999 | 3.64 | 1.00  |
| 39    | 54.86 | -45.02 | -999 | -999 | 3.68 | 1.00  |
| 39    | 59.23 | -45.14 | -999 | -999 | 2.61 | 9.00  |
| 39    | 59.23 | -45.14 | -999 | -999 | 2.99 | 1.00  |
| 39    | 59.31 | -45.87 | -999 | -999 | 3.43 | 1.00  |
| <hr/> |       |        |      |      |      |       |
| 40    | 43.44 | -57.69 | -999 | -999 | 7.73 | 7.00  |
| 40    | 43.44 | -57.69 | -999 | -999 | 7.99 | 1.00  |
| 40    | 43.44 | -57.69 | -999 | -999 | 7.53 | 1.00  |
| 40    | 39.05 | -57.53 | -999 | -999 | 3.05 | 9.00  |
| 40    | 39.05 | -57.53 | -999 | -999 | 2.93 | 1.00  |
| 40    | 42.61 | -45.23 | -999 | -999 | 2.84 | 1.00  |
| 40    | 46.50 | -45.00 | -999 | -999 | 3.60 | 6.00  |
| 40    | 46.50 | -45.00 | -999 | -999 | 3.64 | 1.00  |
| 40    | 46.50 | -45.00 | -999 | -999 | 3.78 | 1.00  |
| 40    | 51.09 | -45.08 | -999 | -999 | 2.30 | 8.00  |
| 40    | 51.09 | -45.08 | -999 | -999 | 2.10 | 1.00  |
| 40    | 51.09 | -45.08 | -999 | -999 | 2.14 | 1.00  |
| 40    | 54.83 | -45.01 | -999 | -999 | 3.38 | 1.00  |
| 40    | 54.83 | -45.01 | -999 | -999 | 3.39 | 1.00  |
| 40    | 54.83 | -45.01 | -999 | -999 | 3.53 | 1.00  |
| 40    | 59.57 | -44.79 | -999 | -999 | 0.97 | 1.00  |
| 40    | 59.57 | -44.79 | -999 | -999 | 1.02 | 1.00  |
| 40    | 55.30 | -45.00 | -999 | -999 | 3.43 | 4.00  |
| 40    | 55.30 | -45.00 | -999 | -999 | 3.45 | 4.00  |
| 40    | 55.30 | -45.00 | -999 | -999 | 3.51 | 4.00  |
| 40    | 55.30 | -45.00 | -999 | -999 | 3.63 | 4.00  |
| 40    | 56.50 | -45.00 | -999 | -999 | 2.64 | 4.00  |
| 40    | 56.50 | -45.00 | -999 | -999 | 2.67 | 4.00  |
| 40    | 57.40 | -45.00 | -999 | -999 | 2.32 | 4.00  |
| 40    | 57.40 | -45.00 | -999 | -999 | 2.33 | 4.00  |

|    |       |         |      |      |      |       |
|----|-------|---------|------|------|------|-------|
| 40 | 59.50 | -45.30  | -999 | -999 | 1.09 | 4.00  |
| 40 | 59.50 | -45.30  | -999 | -999 | 1.10 | 4.00  |
| 40 | 59.60 | -44.80  | -999 | -999 | 1.01 | 4.00  |
| 40 | 59.60 | -44.80  | -999 | -999 | 1.05 | 4.00  |
| 40 | 59.60 | -44.80  | -999 | -999 | 0.96 | 4.00  |
| 40 | 59.60 | -44.80  | -999 | -999 | 0.98 | 4.00  |
| 40 | 59.60 | -44.80  | -999 | -999 | 0.96 | 4.00  |
| 40 | 59.60 | -44.80  | -999 | -999 | 0.97 | 4.00  |
| 40 | 59.40 | -45.80  | -999 | -999 | 0.87 | 4.00  |
| 40 | 59.00 | -47.30  | -999 | -999 | 1.40 | 4.00  |
| 40 | 59.00 | -47.30  | -999 | -999 | 1.44 | 4.00  |
| 40 | 58.70 | -49.00  | -999 | -999 | 1.23 | 4.00  |
| 40 | 56.50 | -47.50  | -999 | -999 | 2.10 | 4.00  |
| 40 | 56.50 | -47.50  | -999 | -999 | 2.13 | 4.00  |
| 40 | 56.20 | -46.70  | -999 | -999 | 2.21 | 4.00  |
| 40 | 56.20 | -46.70  | -999 | -999 | 2.24 | 4.00  |
| 40 | 55.00 | -50.60  | -999 | -999 | 1.22 | 4.00  |
| 40 | 55.00 | -50.60  | -999 | -999 | 1.27 | 4.00  |
| 40 | 54.40 | -51.60  | -999 | -999 | 1.11 | 4.00  |
| 40 | 54.40 | -51.60  | -999 | -999 | 1.18 | 4.00  |
| 41 | 50.00 | -145.00 | -999 | -999 | 4.92 | 0.00  |
| 41 | 50.19 | -144.73 | -999 | -999 | 5.41 | 10.00 |
| 41 | 50.19 | -144.73 | -999 | -999 | 5.50 | 5.00  |
| 41 | 50.34 | -144.76 | -999 | -999 | 5.22 | 5.00  |
| 41 | 50.34 | -144.76 | -999 | -999 | 5.39 | 10.00 |
| 41 | 50.21 | -144.76 | -999 | -999 | 6.21 | 5.00  |
| 41 | 50.21 | -144.76 | -999 | -999 | 6.43 | 10.00 |
| 41 | 50.34 | -144.94 | -999 | -999 | 4.87 | 5.00  |
| 41 | 50.34 | -144.94 | -999 | -999 | 5.54 | 10.00 |
| 41 | 50.34 | -144.82 | -999 | -999 | 5.30 | 5.00  |
| 41 | 50.34 | -144.82 | -999 | -999 | 6.60 | 10.00 |
| 41 | 50.33 | -144.91 | -999 | -999 | 4.97 | 5.00  |
| 41 | 50.33 | -144.91 | -999 | -999 | 5.23 | 10.00 |
| 41 | 50.39 | -144.77 | -999 | -999 | 5.45 | 5.00  |
| 41 | 50.39 | -144.77 | -999 | -999 | 5.50 | 10.00 |
| 41 | 50.38 | -144.50 | -999 | -999 | 6.03 | 10.00 |
| 41 | 50.38 | -144.50 | -999 | -999 | 6.07 | 5.00  |
| 41 | 50.42 | -144.75 | -999 | -999 | 6.14 | 5.00  |
| 41 | 50.42 | -144.75 | -999 | -999 | 6.28 | 10.00 |
| 41 | 50.62 | -144.75 | -999 | -999 | 5.62 | 5.00  |
| 41 | 50.62 | -144.75 | -999 | -999 | 5.73 | 10.00 |
| 41 | 50.47 | -144.78 | -999 | -999 | 5.34 | 10.00 |
| 41 | 50.47 | -144.78 | -999 | -999 | 5.50 | 5.00  |
| 41 | 50.50 | -144.75 | -999 | -999 | 6.22 | 5.00  |
| 41 | 50.50 | -144.75 | -999 | -999 | 6.24 | 10.00 |
| 41 | 50.55 | -144.61 | -999 | -999 | 6.03 | 5.00  |
| 41 | 50.55 | -144.61 | -999 | -999 | 6.20 | 10.00 |

|    |       |         |        |         |      |       |
|----|-------|---------|--------|---------|------|-------|
| 41 | 50.58 | -144.80 | -999   | -999    | 5.47 | 10.00 |
| 41 | 50.58 | -144.80 | -999   | -999    | 5.60 | 5.00  |
| 41 | 50.69 | -144.63 | -999   | -999    | 6.42 | 10.00 |
| 41 | 50.69 | -144.63 | -999   | -999    | 6.49 | 5.00  |
| 41 | 50.66 | -144.59 | -999   | -999    | 6.58 | 5.00  |
| 41 | 50.66 | -144.59 | -999   | -999    | 6.67 | 10.00 |
| 41 | 50.62 | -144.79 | -999   | -999    | 5.01 | 5.00  |
| 41 | 50.62 | -144.79 | -999   | -999    | 5.27 | 10.00 |
| 41 | 50.70 | -144.72 | -999   | -999    | 5.10 | 10.00 |
| 41 | 50.70 | -144.72 | -999   | -999    | 5.25 | 5.00  |
| 41 | 50.78 | -144.57 | -999   | -999    | 5.63 | 5.00  |
| 41 | 50.78 | -144.57 | -999   | -999    | 5.66 | 10.00 |
| 41 | 50.85 | -144.68 | -999   | -999    | 4.93 | 5.00  |
| 41 | 50.85 | -144.68 | -999   | -999    | 4.97 | 10.00 |
| 41 | 50.90 | -144.61 | -999   | -999    | 4.27 | 5.00  |
| 41 | 50.90 | -144.61 | -999   | -999    | 4.28 | 10.00 |
| 41 | 51.03 | -144.39 | -999   | -999    | 4.51 | 10.00 |
| 41 | 51.03 | -144.39 | -999   | -999    | 4.58 | 5.00  |
| 41 | 50.95 | -144.35 | -999   | -999    | 4.30 | 5.00  |
| 41 | 50.95 | -144.35 | -999   | -999    | 4.31 | 10.00 |
| 41 | 50.95 | -144.35 | -999   | -999    | 4.34 | 5.00  |
| 41 | 50.95 | -144.35 | -999   | -999    | 4.34 | 5.00  |
| 41 | 50.95 | -144.35 | -999   | -999    | 4.38 | 5.00  |
| 41 | 50.95 | -144.35 | -999   | -999    | 4.43 | 5.00  |
| 41 | 50.90 | -143.98 | -999   | -999    | 4.35 | 10.00 |
| 41 | 50.90 | -143.98 | -999   | -999    | 4.41 | 5.00  |
| 42 | 6.87  | 88.22   | 47.5   | 0.0(ND) | -999 | 0.00  |
| 42 | 7.84  | 88.16   | 31.7   | 0.0(ND) | -999 | 0.00  |
| 42 | 7.87  | 87.21   | 57.4   | 0.0(ND) | -999 | 0.00  |
| 42 | 8.91  | 88.09   | 47.5   | 0.0(ND) | -999 | 0.00  |
| 42 | 9.91  | 88.07   | 35.6   | 0.0(ND) | -999 | 0.00  |
| 42 | 10.96 | 88.23   | 43.5   | 0.0(ND) | -999 | 0.00  |
| 42 | 11.96 | 88.26   | 59.4   | 0.0(ND) | -999 | 0.00  |
| 43 | 29.06 | -85.60  | 129.58 | 8.42    | -999 | 5.00  |
| 43 | 28.90 | -85.41  | 105.74 | 7.64    | -999 | 5.00  |
| 43 | 28.67 | -85.13  | 114.04 | 10.03   | -999 | 5.00  |
| 43 | 28.51 | -84.93  | 95.24  | 7.65    | -999 | 5.00  |
| 43 | 28.27 | -84.64  | 107.46 | 9.97    | -999 | 5.00  |
| 43 | 28.11 | -84.45  | 80.71  | 7.28    | -999 | 5.00  |
| 43 | 28.00 | -84.11  | 83.08  | 6.85    | -999 | 5.00  |
| 43 | 28.00 | -83.85  | 95.51  | 8.52    | -999 | 5.00  |
| 43 | 28.00 | -83.46  | 41.38  | 6.32    | -999 | 5.00  |
| 43 | 28.00 | -83.20  | 165.02 | 37.30   | -999 | 5.00  |
| 43 | 27.99 | -82.95  | -999   | -999    | -999 | 5.00  |
| 43 | 27.99 | -82.97  | -999   | -999    | -999 | 5.00  |
| 43 | 27.93 | -83.06  | -999   | -999    | -999 | 5.00  |
| 43 | 27.84 | -83.23  | 366.79 | 32.83   | -999 | 5.00  |

|    |       |        |        |       |      |      |
|----|-------|--------|--------|-------|------|------|
| 43 | 27.74 | -83.39 | 127.11 | 13.96 | -999 | 5.00 |
| 43 | 27.63 | -83.54 | 84.73  | 8.87  | -999 | 5.00 |
| 43 | 27.55 | -83.68 | 57.35  | 5.47  | -999 | 5.00 |
| 43 | 27.45 | -83.83 | 55.27  | 5.11  | -999 | 5.00 |
| 43 | 27.33 | -84.00 | 65.17  | 6.49  | -999 | 5.00 |
| 43 | 27.26 | -84.10 | 69.53  | 7.15  | -999 | 5.00 |
| 43 | 27.11 | -84.33 | 57.25  | 5.11  | -999 | 5.00 |
| 43 | 27.06 | -84.42 | 61.14  | 5.06  | -999 | 5.00 |
| 43 | 26.90 | -84.66 | 67.03  | 6.12  | -999 | 5.00 |
| 43 | 26.89 | -84.67 | 62.35  | 6.11  | -999 | 5.00 |
| 43 | 26.76 | -84.86 | 60.57  | 6.53  | -999 | 5.00 |
| 43 | 26.67 | -85.00 | 64.13  | 6.38  | -999 | 5.00 |
| 43 | 26.67 | -85.00 | 61.53  | 6.85  | -999 | 5.00 |
| 43 | 26.67 | -85.00 | 60.20  | 7.64  | -999 | 5.00 |
| 43 | 26.52 | -85.23 | 59.76  | 8.38  | -999 | 5.00 |
| 43 | 26.40 | -85.41 | 68.06  | 8.56  | -999 | 5.00 |
| 43 | 26.34 | -85.51 | 57.86  | 9.32  | -999 | 5.00 |
| 43 | 26.34 | -85.51 | 64.99  | 10.06 | -999 | 5.00 |
| 43 | 26.27 | -85.62 | 65.41  | 7.18  | -999 | 5.00 |
| 43 | 26.15 | -85.78 | 56.59  | 4.91  | -999 | 5.00 |
| 43 | 26.00 | -86.00 | 125.16 | 11.02 | -999 | 5.00 |
| 43 | 25.98 | -85.99 | 101.29 | 10.55 | -999 | 5.00 |
| 43 | 25.93 | -85.99 | 69.27  | 7.66  | -999 | 5.00 |
| 43 | 25.88 | -86.04 | 61.00  | 6.21  | -999 | 5.00 |
| 43 | 25.80 | -86.30 | 42.41  | 4.55  | -999 | 5.00 |
| 43 | 25.78 | -86.37 | 39.97  | 4.55  | -999 | 5.00 |
| 43 | 25.77 | -86.35 | 36.29  | 4.62  | -999 | 5.00 |
| 43 | 25.75 | -86.32 | 37.07  | 4.62  | -999 | 5.00 |
| 43 | 25.58 | -85.94 | 31.48  | 4.24  | -999 | 5.00 |
| 43 | 25.47 | -85.68 | 71.52  | 7.27  | -999 | 5.00 |
| 43 | 25.28 | -85.29 | 59.99  | 6.23  | -999 | 5.00 |
| 43 | 25.16 | -85.02 | 54.91  | 5.77  | -999 | 5.00 |
| 43 | 24.97 | -84.63 | 56.28  | 6.07  | -999 | 5.00 |
| 43 | 24.85 | -84.36 | 59.69  | 5.72  | -999 | 5.00 |
| 43 | 24.68 | -83.98 | 35.43  | 4.19  | -999 | 5.00 |
| 43 | 24.58 | -83.74 | 30.56  | 3.28  | -999 | 5.00 |
| 43 | 24.41 | -83.40 | -999   | -999  | -999 | 5.00 |
| 43 | 24.30 | -83.18 | 45.42  | 7.41  | -999 | 5.00 |
| 43 | 24.31 | -82.84 | 51.07  | -999  | -999 | 5.00 |
| 43 | 24.32 | -82.61 | 44.32  | 6.65  | -999 | 5.00 |
| 43 | 24.34 | -82.28 | 43.07  | 5.53  | -999 | 5.00 |
| 43 | 24.35 | -82.05 | 36.47  | 5.19  | -999 | 5.00 |
| 43 | 24.37 | -81.69 | 49.37  | 7.93  | -999 | 5.00 |
| 43 | 24.43 | -81.45 | 42.23  | 7.45  | -999 | 5.00 |
| 43 | 24.55 | -81.06 | 40.39  | 6.81  | -999 | 5.00 |
| 43 | 24.62 | -80.79 | 43.17  | 6.94  | -999 | 5.00 |
| 43 | 24.86 | -80.43 | 37.58  | 6.44  | -999 | 5.00 |

|    |       |        |        |       |      |      |
|----|-------|--------|--------|-------|------|------|
| 43 | 25.05 | -80.21 | 37.41  | 6.71  | -999 | 5.00 |
| 43 | 25.43 | -80.04 | 113.67 | 22.07 | -999 | 5.00 |
| 43 | 25.67 | -80.04 | 101.14 | 17.75 | -999 | 5.00 |
| 43 | 26.02 | -80.03 | 41.09  | 7.15  | -999 | 5.00 |
| 43 | 26.27 | -80.02 | 45.84  | 8.60  | -999 | 5.00 |
| 43 | 26.67 | -80.00 | 60.15  | 11.43 | -999 | 5.00 |
| 43 | 26.96 | -79.98 | 54.46  | 9.43  | -999 | 5.00 |
| 43 | 26.97 | -79.94 | 33.45  | 5.86  | -999 | 5.00 |
| 43 | 27.01 | -79.92 | 33.59  | 5.65  | -999 | 5.00 |
| 43 | 27.01 | -79.86 | 29.75  | 5.48  | -999 | 5.00 |
| 43 | 27.00 | -79.79 | 29.01  | 5.31  | -999 | 5.00 |
| 43 | 26.98 | -79.78 | 35.03  | 6.03  | -999 | 5.00 |
| 43 | 26.99 | -79.73 | 37.97  | 6.31  | -999 | 5.00 |
| 43 | 27.01 | -79.68 | 44.26  | 7.07  | -999 | 5.00 |
| 43 | 26.96 | -79.62 | 39.22  | 6.73  | -999 | 5.00 |
| 43 | 27.08 | -79.65 | 34.33  | 6.33  | -999 | 5.00 |
| 43 | 27.35 | -79.78 | 32.06  | 5.75  | -999 | 5.00 |
| 43 | 27.74 | -79.97 | 26.30  | 4.73  | -999 | 5.00 |
| 43 | 28.02 | -80.01 | 39.41  | 7.98  | -999 | 5.00 |
| 43 | 28.44 | -80.04 | 87.67  | 17.62 | -999 | 5.00 |
| 43 | 28.71 | -80.07 | 71.99  | 16.45 | -999 | 5.00 |
| 43 | 29.01 | -80.10 | 26.89  | 5.08  | -999 | 5.00 |
| 43 | 29.28 | -80.12 | 28.05  | 5.13  | -999 | 5.00 |
| 43 | 29.71 | -80.16 | 27.69  | 4.55  | -999 | 5.00 |
| 43 | 30.01 | -80.18 | 39.26  | 7.54  | -999 | 5.00 |
| 43 | 30.40 | -80.23 | 40.67  | 7.51  | -999 | 5.00 |
| 43 | 30.59 | -80.35 | 24.81  | 4.90  | -999 | 5.00 |
| 43 | 30.90 | -80.55 | 27.82  | 7.73  | -999 | 5.00 |
| 43 | 31.09 | -80.67 | 32.34  | 8.99  | -999 | 5.00 |
| 43 | 31.38 | -80.85 | 33.08  | 10.30 | -999 | 5.00 |
| 43 | 31.40 | -80.88 | -999   | -999  | -999 | 5.00 |
| 43 | 31.39 | -80.86 | 33.81  | 9.35  | -999 | 5.00 |
| 43 | 31.41 | -80.86 | 31.90  | 8.75  | -999 | 5.00 |
| 43 | 31.47 | -80.92 | 27.68  | 6.95  | -999 | 5.00 |
| 43 | 31.63 | -80.90 | 23.10  | 6.09  | -999 | 5.00 |
| 43 | 31.86 | -80.88 | 22.94  | 8.47  | -999 | 5.00 |
| 43 | 31.86 | -80.88 | 22.50  | 7.79  | -999 | 5.00 |
| 43 | 31.81 | -80.86 | 21.56  | 6.54  | -999 | 5.00 |
| 43 | 31.60 | -80.81 | 25.48  | 7.52  | -999 | 5.00 |
| 43 | 31.40 | -80.74 | 31.85  | 9.77  | -999 | 5.00 |
| 43 | 31.34 | -80.60 | 35.06  | 11.88 | -999 | 5.00 |
| 43 | 31.26 | -80.41 | 35.52  | 10.55 | -999 | 5.00 |
| 43 | 31.24 | -80.37 | 38.15  | 11.58 | -999 | 5.00 |
| 43 | 31.17 | -80.19 | 27.60  | 7.96  | -999 | 5.00 |
| 43 | 31.09 | -79.99 | 23.96  | 5.85  | -999 | 5.00 |
| 43 | 31.04 | -79.87 | 29.94  | 6.43  | -999 | 5.00 |
| 43 | 30.98 | -79.71 | 30.89  | 6.15  | -999 | 5.00 |



|    |       |        |       |      |      |      |
|----|-------|--------|-------|------|------|------|
| 43 | 31.01 | -79.63 | 31.72 | 6.06 | -999 | 5.00 |
| 43 | 30.93 | -79.54 | 33.84 | 5.93 | -999 | 5.00 |
| 43 | 30.83 | -79.45 | 36.58 | 6.91 | -999 | 5.00 |
| 43 | 30.86 | -79.42 | 37.39 | 6.98 | -999 | 5.00 |
| 43 | 30.76 | -79.23 | 48.48 | 9.14 | -999 | 5.00 |
| 43 | 30.69 | -79.04 | 32.06 | 5.11 | -999 | 5.00 |
| 43 | 30.69 | -79.00 | 24.24 | 5.18 | -999 | 5.00 |
| 43 | 30.63 | -78.84 | 32.94 | 6.73 | -999 | 5.00 |
| 43 | 30.52 | -78.57 | 24.14 | 4.93 | -999 | 5.00 |
| 43 | 30.49 | -78.50 | 25.76 | 5.24 | -999 | 5.00 |
| 43 | 30.48 | -78.47 | 24.63 | 5.31 | -999 | 5.00 |
| 43 | 30.41 | -78.29 | 26.02 | 5.98 | -999 | 5.00 |
| 43 | 30.30 | -78.01 | 24.08 | 4.42 | -999 | 5.00 |
| 43 | 30.29 | -78.00 | 25.07 | 4.89 | -999 | 5.00 |
| 43 | 30.42 | -78.14 | 26.26 | 5.23 | -999 | 5.00 |
| 43 | 30.52 | -78.24 | 27.42 | 5.73 | -999 | 5.00 |
| 43 | 30.77 | -78.51 | 28.74 | 5.84 | -999 | 5.00 |
| 43 | 30.94 | -78.69 | 29.89 | 6.07 | -999 | 5.00 |
| 43 | 31.20 | -78.96 | 39.52 | 7.89 | -999 | 5.00 |
| 43 | 31.37 | -79.15 | 38.85 | 7.53 | -999 | 5.00 |
| 43 | 31.63 | -79.43 | 32.28 | 6.78 | -999 | 5.00 |
| 43 | 31.80 | -79.61 | 36.35 | 7.85 | -999 | 5.00 |
| 43 | 31.97 | -79.46 | 28.85 | 6.09 | -999 | 5.00 |
| 43 | 32.07 | -79.31 | 18.35 | 4.50 | -999 | 5.00 |
| 43 | 32.24 | -79.08 | 19.89 | 5.23 | -999 | 5.00 |
| 43 | 32.36 | -78.92 | 18.93 | 4.85 | -999 | 5.00 |
| 43 | 32.54 | -78.67 | 17.01 | 4.09 | -999 | 5.00 |
| 43 | 32.66 | -78.52 | 17.99 | 4.17 | -999 | 5.00 |
| 43 | 32.79 | -78.33 | 19.68 | 4.46 | -999 | 5.00 |
| 43 | 32.89 | -78.20 | 19.39 | 4.61 | -999 | 5.00 |
| 43 | 33.06 | -77.97 | 18.59 | 5.05 | -999 | 5.00 |
| 43 | 33.18 | -77.81 | 19.03 | 4.88 | -999 | 5.00 |
| 43 | 33.35 | -77.58 | 21.23 | 5.40 | -999 | 5.00 |
| 43 | 33.46 | -77.42 | 23.38 | 6.22 | -999 | 5.00 |
| 43 | 33.62 | -77.20 | 20.38 | 4.83 | -999 | 5.00 |
| 43 | 33.74 | -77.04 | 20.20 | 5.29 | -999 | 5.00 |
| 43 | 33.92 | -76.79 | 19.03 | 4.77 | -999 | 5.00 |
| 43 | 34.04 | -76.63 | 19.01 | 4.78 | -999 | 5.00 |
| 43 | 34.22 | -76.39 | 22.58 | 5.46 | -999 | 5.00 |
| 43 | 34.33 | -76.23 | 25.48 | 6.42 | -999 | 5.00 |
| 43 | 34.51 | -75.99 | 28.71 | 6.29 | -999 | 5.00 |
| 43 | 34.61 | -75.82 | 33.73 | 6.89 | -999 | 5.00 |
| 43 | 34.80 | -75.58 | 34.22 | 6.77 | -999 | 5.00 |
| 43 | 34.92 | -75.42 | 29.73 | 6.34 | -999 | 5.00 |
| 43 | 35.08 | -75.18 | 30.71 | 6.08 | -999 | 5.00 |
| 43 | 35.21 | -75.04 | 30.33 | 6.27 | -999 | 5.00 |
| 43 | 35.47 | -75.05 | 19.06 | 6.03 | -999 | 5.00 |

|    |       |        |       |       |      |      |
|----|-------|--------|-------|-------|------|------|
| 43 | 35.58 | -75.05 | 19.30 | 5.69  | -999 | 5.00 |
| 43 | 35.84 | -75.05 | 15.89 | 4.61  | -999 | 5.00 |
| 43 | 36.00 | -75.05 | 15.39 | 4.79  | -999 | 5.00 |
| 43 | 35.96 | -74.95 | 15.87 | 4.62  | -999 | 5.00 |
| 43 | 35.92 | -74.85 | 13.23 | 3.62  | -999 | 5.00 |
| 43 | 35.90 | -74.79 | 13.06 | 3.89  | -999 | 5.00 |
| 43 | 35.90 | -74.79 | 13.42 | 3.90  | -999 | 5.00 |
| 43 | 35.83 | -74.65 | 24.26 | 6.30  | -999 | 5.00 |
| 43 | 35.83 | -74.65 | 23.55 | 5.84  | -999 | 5.00 |
| 43 | 35.75 | -74.45 | 38.31 | 7.48  | -999 | 5.00 |
| 43 | 35.77 | -74.41 | 43.22 | 8.70  | -999 | 5.00 |
| 43 | 35.75 | -74.33 | 58.94 | 11.25 | -999 | 5.00 |
| 43 | 35.63 | -74.28 | 61.66 | 12.20 | -999 | 5.00 |
| 43 | 35.62 | -74.24 | 55.33 | 10.21 | -999 | 5.00 |
| 43 | 35.64 | -74.22 | 57.64 | 10.41 | -999 | 5.00 |
| 43 | 35.52 | -73.99 | 46.81 | 9.00  | -999 | 5.00 |
| 43 | 35.53 | -73.98 | 34.79 | 7.49  | -999 | 5.00 |
| 43 | 35.54 | -73.96 | 36.23 | 6.89  | -999 | 5.00 |
| 43 | 35.44 | -73.90 | 35.29 | 8.15  | -999 | 5.00 |
| 43 | 35.33 | -73.83 | 15.90 | 4.44  | -999 | 5.00 |
| 43 | 35.34 | -73.82 | 15.43 | 4.63  | -999 | 5.00 |
| 43 | 35.28 | -73.75 | 17.30 | 5.05  | -999 | 5.00 |
| 43 | 35.21 | -73.70 | 17.29 | 4.42  | -999 | 5.00 |
| 43 | 35.22 | -73.68 | 18.25 | 4.79  | -999 | 5.00 |
| 43 | 35.19 | -73.64 | 17.37 | 4.63  | -999 | 5.00 |
| 43 | 35.03 | -73.41 | 15.17 | 4.83  | -999 | 5.00 |
| 43 | 35.03 | -73.40 | 16.69 | 4.96  | -999 | 5.00 |
| 43 | 35.03 | -73.40 | 22.64 | 5.48  | -999 | 5.00 |
| 43 | 34.99 | -73.33 | 20.54 | 6.40  | -999 | 5.00 |
| 43 | 34.87 | -73.12 | 21.12 | 5.97  | -999 | 5.00 |
| 43 | 34.87 | -73.12 | 27.16 | 6.88  | -999 | 5.00 |
| 43 | 34.87 | -73.12 | 31.24 | 7.42  | -999 | 5.00 |
| 43 | 35.01 | -73.25 | 32.37 | 8.33  | -999 | 5.00 |
| 43 | 35.27 | -73.51 | 25.59 | 6.66  | -999 | 5.00 |
| 43 | 35.45 | -73.68 | 32.35 | 8.20  | -999 | 5.00 |
| 43 | 35.95 | -74.33 | 71.35 | 14.80 | -999 | 5.00 |
| 43 | 36.06 | -74.55 | 69.42 | 13.09 | -999 | 5.00 |
| 43 | 36.26 | -74.89 | 61.12 | 13.75 | -999 | 5.00 |
| 43 | 36.39 | -75.13 | 62.17 | 11.82 | -999 | 5.00 |
| 43 | 36.61 | -75.31 | 61.26 | 13.91 | -999 | 5.00 |
| 43 | 36.78 | -75.26 | 56.52 | 12.61 | -999 | 5.00 |
| 43 | 37.03 | -75.20 | 24.80 | 7.69  | -999 | 5.00 |
| 43 | 37.20 | -75.16 | 15.40 | 6.67  | -999 | 5.00 |
| 43 | 37.45 | -75.09 | 14.33 | 5.77  | -999 | 5.00 |
| 43 | 37.62 | -75.05 | 14.25 | 5.14  | -999 | 5.00 |
| 43 | 37.87 | -74.97 | 16.24 | 6.55  | -999 | 5.00 |
| 43 | 38.03 | -74.89 | 18.59 | 7.99  | -999 | 5.00 |

|    |       |        |         |        |      |      |
|----|-------|--------|---------|--------|------|------|
| 43 | 38.28 | -74.78 | 15.80   | 5.51   | -999 | 5.00 |
| 43 | 38.46 | -74.80 | 16.34   | 6.19   | -999 | 5.00 |
| 43 | 38.65 | -74.63 | 14.67   | 5.27   | -999 | 5.00 |
| 43 | 38.79 | -74.60 | 14.55   | 6.07   | -999 | 5.00 |
| 43 | 38.98 | -74.39 | 12.46   | 5.00   | -999 | 5.00 |
| 43 | 39.09 | -74.23 | 12.12   | 4.13   | -999 | 5.00 |
| 43 | 39.28 | -74.16 | 11.10   | 4.02   | -999 | 5.00 |
| 43 | 39.41 | -74.18 | 11.25   | 4.10   | -999 | 5.00 |
| 43 | 39.43 | -74.19 | 14.52   | 5.00   | -999 | 5.00 |
| 43 | 39.35 | -74.09 | 10.42   | 3.64   | -999 | 5.00 |
| 43 | 39.40 | -73.79 | 9.14    | 3.39   | -999 | 5.00 |
| 43 | 39.47 | -73.50 | 9.76    | 3.46   | -999 | 5.00 |
| 43 | 39.73 | -72.39 | 7.26    | 2.79   | -999 | 5.00 |
| 43 | 39.80 | -72.10 | 6.92    | 2.97   | -999 | 5.00 |
| 43 | 39.92 | -71.71 | 6.03    | 2.30   | -999 | 5.00 |
| 43 | 39.93 | -71.42 | 5.11    | 2.07   | -999 | 5.00 |
| 43 | 39.98 | -70.99 | 4.36    | 1.88   | -999 | 5.00 |
| 43 | 40.01 | -70.71 | 5.01    | 1.92   | -999 | 5.00 |
| 43 | 40.18 | -70.38 | 4.95    | 2.08   | -999 | 5.00 |
| 43 | 40.26 | -70.12 | 4.68    | 1.90   | -999 | 5.00 |
| 43 | 40.35 | -69.76 | 5.70    | 2.75   | -999 | 5.00 |
| 43 | 40.39 | -69.58 | 5.64    | 2.52   | -999 | 5.00 |
| 43 | 40.44 | -69.32 | 5.32    | 2.98   | -999 | 5.00 |
| 43 | 40.47 | -69.15 | 4.98    | 2.79   | -999 | 5.00 |
| 43 | 40.64 | -68.99 | 5.19    | 2.77   | -999 | 5.00 |
| 43 | 40.78 | -68.97 | 6.37    | 3.44   | -999 | 5.00 |
| 43 | 41.02 | -69.08 | 8.59    | 4.09   | -999 | 5.00 |
| 43 | 41.15 | -69.18 | 7.40    | 2.79   | -999 | 5.00 |
| 43 | 41.33 | -69.29 | 11.78   | 3.18   | -999 | 5.00 |
| 43 | 41.45 | -69.37 | 14.03   | 3.86   | -999 | 5.00 |
| 43 | 41.63 | -69.51 | 18.28   | 4.02   | -999 | 5.00 |
| 43 | 41.75 | -69.59 | 20.46   | 3.95   | -999 | 5.00 |
| 43 | 41.93 | -69.71 | 30.57   | 4.96   | -999 | 5.00 |
| 43 | 42.05 | -69.79 | 22.29   | 3.77   | -999 | 5.00 |
| 43 | 42.23 | -69.92 | 21.23   | 3.48   | -999 | 5.00 |
| 43 | 42.33 | -70.04 | 16.12   | 2.84   | -999 | 5.00 |
| 43 | 42.35 | -70.34 | 34.11   | 4.46   | -999 | 5.00 |
| 43 | 42.37 | -70.55 | -999    | -999   | -999 | 5.00 |
| 43 | 42.48 | -70.56 | 1061.65 | 85.76  | -999 | 5.00 |
| 43 | 42.62 | -70.50 | 1208.80 | 114.99 | -999 | 5.00 |
| 43 | 42.88 | -70.51 | 650.30  | 82.04  | -999 | 5.00 |
| 43 | 43.02 | -70.55 | 1208.26 | 145.65 | -999 | 5.00 |
| 43 | 43.03 | -70.62 | 1288.83 | 137.76 | -999 | 5.00 |
| 43 | 43.01 | -70.54 | 1724.76 | 153.81 | -999 | 5.00 |
| 43 | 42.99 | -70.42 | 273.60  | 38.76  | -999 | 5.00 |
| 43 | 42.94 | -70.30 | 190.67  | 30.34  | -999 | 5.00 |
| 43 | 42.89 | -70.14 | 157.44  | 20.78  | -999 | 5.00 |

|    |       |        |        |       |      |      |
|----|-------|--------|--------|-------|------|------|
| 43 | 42.88 | -70.05 | 133.76 | 19.77 | -999 | 5.00 |
| 43 | 42.86 | -69.86 | 61.39  | 10.22 | -999 | 5.00 |
| 43 | 42.79 | -69.77 | 41.92  | 7.25  | -999 | 5.00 |
| 43 | 42.72 | -69.67 | 28.69  | 6.53  | -999 | 5.00 |
| 43 | 42.66 | -69.51 | 24.21  | 6.05  | -999 | 5.00 |
| 43 | 42.57 | -69.26 | 23.61  | 4.93  | -999 | 5.00 |
| 43 | 42.51 | -69.09 | 29.92  | 6.65  | -999 | 5.00 |
| 43 | 42.46 | -69.00 | 29.01  | 6.59  | -999 | 5.00 |
| 43 | 42.34 | -68.97 | 38.13  | 7.92  | -999 | 5.00 |
| 43 | 41.79 | -68.82 | 30.00  | 7.43  | -999 | 5.00 |
| 43 | 41.65 | -68.79 | 31.06  | 6.33  | -999 | 5.00 |
| 43 | 41.59 | -68.79 | 30.49  | 6.64  | -999 | 5.00 |
| 43 | 41.42 | -68.82 | 44.52  | 9.99  | -999 | 5.00 |
| 43 | 41.21 | -68.85 | 48.54  | 10.02 | -999 | 5.00 |
| 43 | 41.08 | -68.87 | 44.82  | 16.71 | -999 | 5.00 |
| 43 | 41.01 | -68.89 | 41.16  | 17.13 | -999 | 5.00 |
| 43 | 40.88 | -68.94 | 40.81  | 16.67 | -999 | 5.00 |
| 43 | 40.83 | -69.05 | 32.78  | 14.67 | -999 | 5.00 |
| 43 | 40.75 | -69.18 | 37.82  | 16.64 | -999 | 5.00 |
| 43 | 40.60 | -69.30 | 45.69  | 19.70 | -999 | 5.00 |
| 43 | 40.50 | -69.30 | 60.02  | 22.90 | -999 | 5.00 |
| 43 | 40.56 | -69.49 | 53.94  | 19.97 | -999 | 5.00 |
| 43 | 40.56 | -69.72 | 41.47  | 17.15 | -999 | 5.00 |
| 43 | 40.68 | -69.99 | 50.33  | 21.55 | -999 | 5.00 |
| 43 | 40.70 | -70.01 | 64.95  | 25.29 | -999 | 5.00 |
| 43 | 40.89 | -70.16 | 60.41  | 21.08 | -999 | 5.00 |
| 43 | 40.99 | -70.25 | 75.60  | 26.74 | -999 | 5.00 |
| 43 | 41.18 | -70.41 | 59.80  | 19.26 | -999 | 5.00 |
| 43 | 41.30 | -70.52 | 89.08  | 27.70 | -999 | 5.00 |
| 43 | 41.32 | -70.61 | 70.54  | 19.94 | -999 | 5.00 |
| 43 | 41.29 | -70.70 | 84.08  | 21.94 | -999 | 5.00 |
| 43 | 41.05 | -70.62 | 51.98  | 16.69 | -999 | 5.00 |
| 43 | 40.94 | -70.53 | 54.78  | 16.80 | -999 | 5.00 |
| 43 | 40.73 | -70.43 | 42.46  | 20.53 | -999 | 5.00 |
| 43 | 40.63 | -70.39 | 41.65  | 18.93 | -999 | 5.00 |
| 43 | 40.50 | -70.32 | 32.49  | 23.57 | -999 | 5.00 |
| 43 | 40.37 | -70.26 | 27.23  | 13.13 | -999 | 5.00 |
| 43 | 40.25 | -70.18 | 18.03  | 13.39 | -999 | 5.00 |

---

**Table S7.** Metadata information of the corresponding datasets listed in Table S6 sorted for the identifier.

| Identifier | Metadata                         |                                                                                                                                                                                                                                                                                                           |
|------------|----------------------------------|-----------------------------------------------------------------------------------------------------------------------------------------------------------------------------------------------------------------------------------------------------------------------------------------------------------|
| <b>1</b>   | Platform type and name           | Ship, SA Agulhas                                                                                                                                                                                                                                                                                          |
|            | Expedition name                  | SWEDARP_97/98                                                                                                                                                                                                                                                                                             |
|            | Cruise start date (UTC)          | 8/12/1997                                                                                                                                                                                                                                                                                                 |
|            | EXPOCODE                         | 91AA19970812                                                                                                                                                                                                                                                                                              |
|            | Dataset creator                  | Katarina Abrahamsson                                                                                                                                                                                                                                                                                      |
|            | PI contact details               | Katarina Abrahamsson, Department of Analytical and Marine Chemistry,<br>Chalmers University of Technology and<br>Göteborg University, k@chem.gu.se                                                                                                                                                        |
|            | Data set origin                  | Host Data center: Pangaea ( <a href="http://doi.pangaea.de/10.1594/PANGAEA.64912">http://doi.pangaea.de/10.1594/PANGAEA.64912</a> )<br>Download: March 2010                                                                                                                                               |
|            | Relevant publications            | Abrahamsson, Katarina, Bertilsson, S, Chierici, M, Fransson, A, Froneman, PW, Lorén, A, Pakhomov, E A (2004): Variations of biogeochemical parameters along a transect in the Southern Ocean, with special emphasis on volatile halogenated organic compounds, Deep Sea Research II, 51(22-24), 2745-2756 |
|            | Sampling technique               | samples collected through ship seawater supply                                                                                                                                                                                                                                                            |
|            | Analysis and detection technique | GC-ECD                                                                                                                                                                                                                                                                                                    |
|            | Calibration technique            | Abrahamsson, Katarina, Bertilsson, S, Chierici, M, Fransson, A, Froneman, PW, Lorén, A, Pakhomov, E A (2004): Variations of biogeochemical parameters along a transect in the Southern Ocean, with special emphasis on volatile halogenated organic compounds, Deep Sea Research II, 51(22-24), 2745-2756 |

|   |                                                                                                                                                                                                            |                                                                                                                                                                                                                                                                                                                                                                                                                              |
|---|------------------------------------------------------------------------------------------------------------------------------------------------------------------------------------------------------------|------------------------------------------------------------------------------------------------------------------------------------------------------------------------------------------------------------------------------------------------------------------------------------------------------------------------------------------------------------------------------------------------------------------------------|
| 2 | Platform type and name<br>PI contact details<br>Data set origin<br>Relevant publications<br><br>Sampling technique<br>Analysis and detection technique<br>Calibration technique<br>Standard referred to    | Shelf Seas Observatory, L4<br>S.D. Archer, Plymouth Marine Laboratory, stda@pml.ac.uk<br>Mail submission: Steve Archer, stda@pml.ac.uk, february2010<br>Archer SD et al. 2007. J. Geophys. Res 112: C08009,<br>doi:10.1029/2006JC003963.<br><br>Stainless Steel Bucket and Niskin bottle<br>GC-ECD with purge and cryo-trap (-150C)<br>Serial dilution of standards in methanol<br>CH3I permeation standard from KinTek, USA |
| 3 | Platform type and name<br>Expedition name<br>Cruise start date (UTC)<br>EXPOCODE<br>Dataset creator<br>PI contact details<br>Data set origin<br><br>Sampling technique<br>Analysis and detection technique | Ship, Discovery<br>DISCO<br>6/4/1999<br>74E319990604<br>Geoff Smith, QinetiQ, enquiries@bodc.ac.uk<br>Tom Bell, SOLAS UK, Thomas.Bell@uea.ac.uk<br>Host data centre: BODC (www.bodc.ac.uk)<br>Mail submission: Thomas.Bell@uea.ac.uk, 09.09.2009<br><br>unfiltered water samples<br>GC/MS                                                                                                                                    |

|   |                                                                                                                                                                                                                                                                                                                                     |                                                                                                                                                                                                                                                                                                                                                                                                                                                                                                                                                                                                                                                                                                                                                                                                                                                                                                                                                                                                                                                                                                                                                                                                                                                                                                                                                                                                                                                                                                                                        |
|---|-------------------------------------------------------------------------------------------------------------------------------------------------------------------------------------------------------------------------------------------------------------------------------------------------------------------------------------|----------------------------------------------------------------------------------------------------------------------------------------------------------------------------------------------------------------------------------------------------------------------------------------------------------------------------------------------------------------------------------------------------------------------------------------------------------------------------------------------------------------------------------------------------------------------------------------------------------------------------------------------------------------------------------------------------------------------------------------------------------------------------------------------------------------------------------------------------------------------------------------------------------------------------------------------------------------------------------------------------------------------------------------------------------------------------------------------------------------------------------------------------------------------------------------------------------------------------------------------------------------------------------------------------------------------------------------------------------------------------------------------------------------------------------------------------------------------------------------------------------------------------------------|
| 4 | <p>Platform type and name</p> <p>Expedition name</p> <p>Cruise start date (UTC)</p> <p>EXPOCODE</p> <p>Dataset creator</p> <p>PI contact details</p> <p>Data set origin</p> <p>Relevant publications</p> <p>Sampling technique</p> <p>Analysis and detection technique</p> <p>Calibration technique</p> <p>Standard referred to</p> | <p>Ship, Discoverer</p> <p>BLAST 1 (Seattle-Punta Arenas: 28.01.-17.02.1994)</p> <p>1/28/1994</p> <p>31DS19940128</p> <p>Juergen M. Lobert</p> <p>James H. Butler, NOAA, James.H.Butler@noaa.gov</p> <p>Host data centre: ftp://ftp.cmdl.noaa.gov/hats/ocean/ (Download: March 2010)</p> <p>Mail submission: James.H.Butler@noaa.gov, 08/2009</p> <p>1) Butler, J.H., King, D.B., Lobert, J.M., Montzka, S.A., Yvon-Lewis, S.A., Hall, B.D., Warwick, N.J., Mondeel, D.J., Aydin, M. and Elkins, J.W., Oceanic distributions and emissions of short-lived halocarbons, Global Biochemical Cycles, Vol. 21, GB1023 (2006)</p> <p>2) ftp://ftp.cmdl.noaa.gov/hats/ocean/Ocean%20GCMS%20Data%201994-2004/</p> <p>equilibrator (trapping of gases from equilibrated seawater and air on adsorbents)</p> <p>Gas chromatography / mass spectrometer (GC/MS) (HCFC-22, CFC-12, CH<sub>3</sub>Cl, CFC-114, Halon-1211, CH<sub>3</sub>Br, CFC-11, CH<sub>3</sub>I, Isoprene, CFC-113, CH<sub>2</sub>Cl<sub>2</sub>, CH<sub>2</sub>BrCl, CHCl<sub>3</sub>, CH<sub>3</sub>CCl<sub>3</sub>, C<sub>6</sub>H<sub>6</sub>, CCl<sub>4</sub>, C<sub>2</sub>HCl<sub>3</sub>, CH<sub>2</sub>Br<sub>2</sub>, CH<sub>2</sub>ICl, C<sub>7</sub>H<sub>8</sub>, CHBr<sub>2</sub>Cl, C<sub>2</sub>Cl<sub>4</sub>, CHBr<sub>3</sub>, CH<sub>2</sub>I<sub>2</sub>)</p> <p>Gas standard,<br/>ftp://ftp.cmdl.noaa.gov/hats/ocean/Ocean%20GCMS%20Data%201994-2004/Message%20to%20potential%20users%20of%20these%20data%20(31%20Aug%202005).pdf</p> <p>NOAA scale</p> |
|---|-------------------------------------------------------------------------------------------------------------------------------------------------------------------------------------------------------------------------------------------------------------------------------------------------------------------------------------|----------------------------------------------------------------------------------------------------------------------------------------------------------------------------------------------------------------------------------------------------------------------------------------------------------------------------------------------------------------------------------------------------------------------------------------------------------------------------------------------------------------------------------------------------------------------------------------------------------------------------------------------------------------------------------------------------------------------------------------------------------------------------------------------------------------------------------------------------------------------------------------------------------------------------------------------------------------------------------------------------------------------------------------------------------------------------------------------------------------------------------------------------------------------------------------------------------------------------------------------------------------------------------------------------------------------------------------------------------------------------------------------------------------------------------------------------------------------------------------------------------------------------------------|

|   |                                                                                                                                                                                                                                                                                                  |                                                                                                                                                                                                                                                                                                                                                                                                                                                                                                                                                                                                                                                                                                                                                                                                                                                                                                                                                                                                                                                                                                                                                                                                                                                                                                                                                                                                                                                                                                                                                                               |
|---|--------------------------------------------------------------------------------------------------------------------------------------------------------------------------------------------------------------------------------------------------------------------------------------------------|-------------------------------------------------------------------------------------------------------------------------------------------------------------------------------------------------------------------------------------------------------------------------------------------------------------------------------------------------------------------------------------------------------------------------------------------------------------------------------------------------------------------------------------------------------------------------------------------------------------------------------------------------------------------------------------------------------------------------------------------------------------------------------------------------------------------------------------------------------------------------------------------------------------------------------------------------------------------------------------------------------------------------------------------------------------------------------------------------------------------------------------------------------------------------------------------------------------------------------------------------------------------------------------------------------------------------------------------------------------------------------------------------------------------------------------------------------------------------------------------------------------------------------------------------------------------------------|
| 5 | Platform type and name<br>Expedition name<br>Cruise start date (UTC)<br>EXPOCODE<br>Dataset creator<br>PI contact details<br>Data set origin<br>Relevant publications<br><br>Sampling technique<br><br>Analysis and detection technique<br><br>Calibration technique<br><br>Standard referred to | Ship, Polarstern<br>BLAST 2 (Bremerhaven-Punta Arenas: 18.10.-21.11.1994)<br>10/18/1994<br>06AQ19941018<br>Juergen. M. Lobert<br>James H. Butler, NOAA, James.H.Butler@noaa.gov<br>Host data centre: ftp://ftp.cmdl.noaa.gov/hats/ocean/ (Download: March 2010)<br><br>1) Butler, J.H., King, D.B., Lobert, J.M., Montzka, S.A., Yvon-Lewis, S.A., Hall, B.D., Warwick, N.J., Mondeel, D.J., Aydin, M. and Elkins, J.W., Oceanic distributions and emissions of short-lived halocarbons, Global Biochemical Cycles, Vol. 21, GB1023 (2006)<br>2) ftp://ftp.cmdl.noaa.gov/hats/ocean/Ocean%20GCMS%20Data%201994-2004/Message%20to%20potential%20users%20of%20these%20data%20(31%20Aug%202005).pdf<br><br>equilibrator (trapping of gases from equilibrated seawater and air on adsorbents)<br><br>Gas chromatography / mass spectrometer (GC/MS) (HCFC-22, CFC-12, CH <sub>3</sub> Cl, CFC-114, Halon-1211, CH <sub>3</sub> Br, CFC-11, CH <sub>3</sub> I, Isoprene, CFC-113, CH <sub>2</sub> Cl <sub>2</sub> , CH <sub>2</sub> BrCl, CHCl <sub>3</sub> , CH <sub>3</sub> CCl <sub>3</sub> , C <sub>6</sub> H <sub>6</sub> , CCl <sub>4</sub> , C <sub>2</sub> HCl <sub>3</sub> , CH <sub>2</sub> Br <sub>2</sub> , CH <sub>2</sub> ICl, C <sub>7</sub> H <sub>8</sub> , CHBr <sub>2</sub> Cl, C <sub>2</sub> Cl <sub>4</sub> , CHBr <sub>3</sub> , CH <sub>2</sub> I <sub>2</sub> )<br><br>Gas standard,<br>ftp://ftp.cmdl.noaa.gov/hats/ocean/Ocean%20GCMS%20Data%201994-2004/Message%20to%20potential%20users%20of%20these%20data%20(31%20Aug%202005).pdf<br><br>NOAA scale |
|---|--------------------------------------------------------------------------------------------------------------------------------------------------------------------------------------------------------------------------------------------------------------------------------------------------|-------------------------------------------------------------------------------------------------------------------------------------------------------------------------------------------------------------------------------------------------------------------------------------------------------------------------------------------------------------------------------------------------------------------------------------------------------------------------------------------------------------------------------------------------------------------------------------------------------------------------------------------------------------------------------------------------------------------------------------------------------------------------------------------------------------------------------------------------------------------------------------------------------------------------------------------------------------------------------------------------------------------------------------------------------------------------------------------------------------------------------------------------------------------------------------------------------------------------------------------------------------------------------------------------------------------------------------------------------------------------------------------------------------------------------------------------------------------------------------------------------------------------------------------------------------------------------|



|   |                                  |                                                                                                                                                                                                                                                                                                                                                                                                                                                                                                                                                                                             |
|---|----------------------------------|---------------------------------------------------------------------------------------------------------------------------------------------------------------------------------------------------------------------------------------------------------------------------------------------------------------------------------------------------------------------------------------------------------------------------------------------------------------------------------------------------------------------------------------------------------------------------------------------|
| 6 | Platform type and name           | Ship, Nathaniel B. Palmer                                                                                                                                                                                                                                                                                                                                                                                                                                                                                                                                                                   |
|   | Expedition name                  | BLAST 3 (McMurdo, Antarctica-Punta Arenas: 22.02.-07.04.1996)                                                                                                                                                                                                                                                                                                                                                                                                                                                                                                                               |
|   | Cruise start date (UTC)          | 2/22/1996                                                                                                                                                                                                                                                                                                                                                                                                                                                                                                                                                                                   |
|   | EXPOCODE                         | 320619960222                                                                                                                                                                                                                                                                                                                                                                                                                                                                                                                                                                                |
|   | Dataset creator                  | Juergen M. Lobert                                                                                                                                                                                                                                                                                                                                                                                                                                                                                                                                                                           |
|   | PI contact details               | James H. Butler, NOAA, James.H.Butler@noaa.gov                                                                                                                                                                                                                                                                                                                                                                                                                                                                                                                                              |
|   | Data set origin                  | Host data centre: ftp://ftp.cmdl.noaa.gov/hats/ocean/blast_iii,<br>ftp://ftp.cmdl.noaa.gov/hats/ocean/Ocean%20GCMS%20Data%201994-<br>2004/Message%20to%20potential%20users<br>%20of%20these%20data%20(31%20Aug%202005).pdf<br>(Download: March 2010)                                                                                                                                                                                                                                                                                                                                        |
|   | Relevant publications            | 1) Butler, J.H., King, D.B., Lobert, J.M., Montzka, S.A., Yvon-Lewis, S.A.,<br>Hall, B.D., Warwick, N.J., Mondeel, D.J., Aydin, M. and Elkins, J.W., Oceanic<br>distributions and emissions of short-lived halocarbons, Global Biochemical<br>Cycles, Vol. 21, GB1023 (2006)                                                                                                                                                                                                                                                                                                                |
|   | Sampling technique               | equilibrator (trapping of gases from equilibrated seawater and air on<br>adsorbents)                                                                                                                                                                                                                                                                                                                                                                                                                                                                                                        |
|   | Analysis and detection technique | Gas chromatography / mass spectrometer (GC/MS) (HCFC-22, CFC-12,<br>CH <sub>3</sub> Cl, CFC-114, Halon-1211, CH <sub>3</sub> Br, CFC-11, CH <sub>3</sub> I, Isoprene, CFC-113,<br>CH <sub>2</sub> Cl <sub>2</sub> , CH <sub>2</sub> BrCl, CHCl <sub>3</sub> , CH <sub>3</sub> CCl <sub>3</sub> , C <sub>6</sub> H <sub>6</sub> , CCl <sub>4</sub> , C <sub>2</sub> HCl <sub>3</sub> , CH <sub>2</sub> Br <sub>2</sub> ,<br>CH <sub>2</sub> ICl, C <sub>7</sub> H <sub>8</sub> , CHBr <sub>2</sub> Cl, C <sub>2</sub> Cl <sub>4</sub> , CHBr <sub>3</sub> , CH <sub>2</sub> I <sub>2</sub> ) |
|   | Calibration technique            | Gas standard,<br>ftp://ftp.cmdl.noaa.gov/hats/ocean/Ocean%20GCMS%20Data%201994-<br>2004/Message%20to%20<br>potential%20users%20of%20these%20data%20(31%20Aug%202005).pdf                                                                                                                                                                                                                                                                                                                                                                                                                    |
|   | Standard referred to             | NOAA scale                                                                                                                                                                                                                                                                                                                                                                                                                                                                                                                                                                                  |

|   |                                                                                                                                                                                                                                                                                                                                     |                                                                                                                                                                                                                                                                                                                                                                                                                                                                                                                                                                                                                                                                                                                                                                                                                                                                                                                                                                                                                                                                                                                                                                                                                                                                                                                                                                                                                                                                                                                                                                                                                                |
|---|-------------------------------------------------------------------------------------------------------------------------------------------------------------------------------------------------------------------------------------------------------------------------------------------------------------------------------------|--------------------------------------------------------------------------------------------------------------------------------------------------------------------------------------------------------------------------------------------------------------------------------------------------------------------------------------------------------------------------------------------------------------------------------------------------------------------------------------------------------------------------------------------------------------------------------------------------------------------------------------------------------------------------------------------------------------------------------------------------------------------------------------------------------------------------------------------------------------------------------------------------------------------------------------------------------------------------------------------------------------------------------------------------------------------------------------------------------------------------------------------------------------------------------------------------------------------------------------------------------------------------------------------------------------------------------------------------------------------------------------------------------------------------------------------------------------------------------------------------------------------------------------------------------------------------------------------------------------------------------|
| 7 | <p>Platform type and name</p> <p>Expedition name</p> <p>Cruise start date (UTC)</p> <p>EXPOCODE</p> <p>Dataset creator</p> <p>PI contact details</p> <p>Data set origin</p> <p>Relevant publications</p> <p>Sampling technique</p> <p>Analysis and detection technique</p> <p>Calibration technique</p> <p>Standard referred to</p> | <p>Ship, Aurora Australis</p> <p>CLIVAR 01 (Hobart, Tasmania-Hobart, in the southern Ocean; 29.10.-13.12.2001)</p> <p>10/29/2001</p> <p>09AR20011029</p> <p>Daniel B. King</p> <p>James H. Butler, NOAA, James.H.Butler@noaa.gov</p> <p>Host data centre:<br/>ftp://ftp.cmdl.noaa.gov/hats/ocean/Ocean%20GCMS%20Data%201994-2004/<br/>(Download: March 2010)</p> <p>1) Butler, J.H., King, D.B., Lobert, J.M., Montzka, S.A., Yvon-Lewis, S.A., Hall, B.D., Warwick, N.J., Mondeel, D.J., Aydin, M. and Elkins, J.W., Oceanic distributions and emissions of short-lived halocarbons, Global Biochemical Cycles, Vol. 21, GB1023 (2006)<br/>2) ftp://ftp.cmdl.noaa.gov/hats/ocean/Ocean%20GCMS%20Data%201994-2004/Message%20to%20potential%20users%20of%20these%20data%20(31%20Aug%202005).pdf</p> <p>equilibrator (trapping of gases from equilibrated seawater and air on adsorbents)</p> <p>Gas chromatography / mass spectrometer (GC/MS) (HCFC-22, CFC-12, CH<sub>3</sub>Cl, CFC-114, Halon-1211, CH<sub>3</sub>Br, CFC-11, CH<sub>3</sub>I, Isoprene, CFC-113, CH<sub>2</sub>Cl<sub>2</sub>, CH<sub>2</sub>BrCl, CHCl<sub>3</sub>, CH<sub>3</sub>CCl<sub>3</sub>, C<sub>6</sub>H<sub>6</sub>, CCl<sub>4</sub>, C<sub>2</sub>HCl<sub>3</sub>, CH<sub>2</sub>Br<sub>2</sub>, CH<sub>2</sub>ICl, C<sub>7</sub>H<sub>8</sub>, CHBr<sub>2</sub>Cl, C<sub>2</sub>Cl<sub>4</sub>, CHBr<sub>3</sub>, CH<sub>2</sub>I<sub>2</sub>)</p> <p>Gas standard,<br/>ftp://ftp.cmdl.noaa.gov/hats/ocean/Ocean%20GCMS%20Data%201994-2004/Message%20to%20potential%20users%20of%20these%20data%20(31%20Aug%202005).pdf</p> <p>NOAA scale</p> |
|---|-------------------------------------------------------------------------------------------------------------------------------------------------------------------------------------------------------------------------------------------------------------------------------------------------------------------------------------|--------------------------------------------------------------------------------------------------------------------------------------------------------------------------------------------------------------------------------------------------------------------------------------------------------------------------------------------------------------------------------------------------------------------------------------------------------------------------------------------------------------------------------------------------------------------------------------------------------------------------------------------------------------------------------------------------------------------------------------------------------------------------------------------------------------------------------------------------------------------------------------------------------------------------------------------------------------------------------------------------------------------------------------------------------------------------------------------------------------------------------------------------------------------------------------------------------------------------------------------------------------------------------------------------------------------------------------------------------------------------------------------------------------------------------------------------------------------------------------------------------------------------------------------------------------------------------------------------------------------------------|

|   |                                  |                                                                                                                                                                                                                                                                                                                                                                                                                           |
|---|----------------------------------|---------------------------------------------------------------------------------------------------------------------------------------------------------------------------------------------------------------------------------------------------------------------------------------------------------------------------------------------------------------------------------------------------------------------------|
| 8 | Platform type and name           | Ship, NOAA Ship Ronald H. Brown                                                                                                                                                                                                                                                                                                                                                                                           |
|   | Expedition name                  | Gas Ex 98 (Miami-Newport, North Atlantic and Northeast Pacific, 07.05.1998-27.07.1998)                                                                                                                                                                                                                                                                                                                                    |
|   | Cruise start date (UTC)          | 5/7/1998                                                                                                                                                                                                                                                                                                                                                                                                                  |
|   | EXPOCODE                         | 33RO19980507                                                                                                                                                                                                                                                                                                                                                                                                              |
|   | Dataset creator                  | Daniel B. King                                                                                                                                                                                                                                                                                                                                                                                                            |
|   | PI contact details               | James H. Butler, NOAA, James.H.Butler@noaa.gov                                                                                                                                                                                                                                                                                                                                                                            |
|   | Data set origin                  | Host data centre: ftp://ftp.cmdl.noaa.gov/hats/ocean/gasex_98 (Download: March 2010)                                                                                                                                                                                                                                                                                                                                      |
|   | Relevant publications            | 1) Butler, J.H., King, D.B., Lobert, J.M., Montzka, S.A., Yvon-Lewis, S.A., Hall, B.D., Warwick, N.J., Mondeel, D.J., Aydin, M. and Elkins, J.W., Oceanic distributions and emissions of short-lived halocarbons, Global Biochemical Cycles, Vol. 21, GB1023 (2006)<br>2) ftp://ftp.cmdl.noaa.gov/hats/ocean/Ocean%20GCMS%20Data%201994-2004/Message%20to%20potential%20users%20of%20these%20data%20(31%20Aug%202005).pdf |
|   | Sampling technique               | equilibrator (trapping of gases from equilibrated seawater and air on adsorbents)                                                                                                                                                                                                                                                                                                                                         |
|   | Analysis and detection technique | Gas chromatography / mass spectrometer (GC/MS) (HCFC-22, CFC-12, CH3Cl, CFC-114, Halon-1211, CH3Br, CFC-11, CH3I, Isoprene, CFC-113, CH2Cl2, CH2BrCl, CHCl3, CH3CCl3, C6H6, CCl4, C2HCl3, CH2Br2, CH2ICl, C7H8, CHBr2Cl, C2Cl4, CHBr3, CH2I2)                                                                                                                                                                             |
|   | Calibration technique            | Gas standard,<br>ftp://ftp.cmdl.noaa.gov/hats/ocean/Ocean%20GCMS%20Data%201994-2004/Message%20to%20potential%20users%20of%20these%20data%20(31%20Aug%202005).pdf                                                                                                                                                                                                                                                          |
|   | Standard referred to             | NOAA scale                                                                                                                                                                                                                                                                                                                                                                                                                |

|   |                                                                                                                                                                                                                                                                                                                                                         |                                                                                                                                                                                                                                                                                                                                                                                                                                                                                                                                                                                                                                                                                                                                                                                                                                                                                                                                                                                                                                                                                                                                                                                                                                                                                                                                                                                                                                                                                                                                                                                            |
|---|---------------------------------------------------------------------------------------------------------------------------------------------------------------------------------------------------------------------------------------------------------------------------------------------------------------------------------------------------------|--------------------------------------------------------------------------------------------------------------------------------------------------------------------------------------------------------------------------------------------------------------------------------------------------------------------------------------------------------------------------------------------------------------------------------------------------------------------------------------------------------------------------------------------------------------------------------------------------------------------------------------------------------------------------------------------------------------------------------------------------------------------------------------------------------------------------------------------------------------------------------------------------------------------------------------------------------------------------------------------------------------------------------------------------------------------------------------------------------------------------------------------------------------------------------------------------------------------------------------------------------------------------------------------------------------------------------------------------------------------------------------------------------------------------------------------------------------------------------------------------------------------------------------------------------------------------------------------|
| 9 | <p>Platform type and name</p> <p>Expedition name</p> <p>Cruise start date (UTC)</p> <p>EXPOCODE</p> <p>Dataset creator</p> <p>PI contact details</p> <p>Data set origin</p><br><p>Relevant publications</p><br><br><br><p>Sampling technique</p> <p>Analysis and detection technique</p><br><p>Calibration technique</p><br><p>Standard referred to</p> | <p>Ship, R/V Wecoma</p> <p>Phase 1-04 (Guam-Newport, 22.05.2004-02.07.2004)</p> <p>5/22/2004</p> <p>32WC20040522</p> <p>Daniel B. King</p> <p>James H. Butler, NOAA, James.H.Butler@noaa.gov</p> <p>Host data centre:<br/>ftp://ftp.cmdl.noaa.gov/hats/ocean/Ocean%20GCMS%20Data%201994-2004/<br/>(Download: March 2010)</p> <p>1) Butler, J.H., King, D.B., Lobert, J.M., Montzka, S.A., Yvon-Lewis, S.A., Hall, B.D., Warwick, N.J., Mondeel, D.J., Aydin, M. and Elkins, J.W., Oceanic distributions and emissions of short-lived halocarbons, Global Biochemical Cycles, Vol. 21, GB1023 (2006)<br/>2) ftp://ftp.cmdl.noaa.gov/hats/ocean/Ocean%20GCMS%20Data%201994-2004/Message%20to%20potential%20users%20of%20these%20data%20(31%20Aug%202005).pdf</p> <p>equilibrator (trapping of gases from equilibrated seawater and air on adsorbents)</p> <p>Gas chromatography / mass spectrometer (GC/MS) (HCFC-22, CFC-12, CH<sub>3</sub>Cl, CFC-114, Halon-1211, CH<sub>3</sub>Br, CFC-11, CH<sub>3</sub>I, Isoprene, CFC-113, CH<sub>2</sub>Cl<sub>2</sub>, CH<sub>2</sub>BrCl, CHCl<sub>3</sub>, CH<sub>3</sub>CCl<sub>3</sub>, C<sub>6</sub>H<sub>6</sub>, CCl<sub>4</sub>, C<sub>2</sub>HCl<sub>3</sub>, CH<sub>2</sub>Br<sub>2</sub>, CH<sub>2</sub>ICl, C<sub>7</sub>H<sub>8</sub>, CHBr<sub>2</sub>Cl, C<sub>2</sub>Cl<sub>4</sub>, CHBr<sub>3</sub>, CH<sub>2</sub>I<sub>2</sub>)</p> <p>Gas standard,<br/>ftp://ftp.cmdl.noaa.gov/hats/ocean/Ocean%20GCMS%20Data%201994-2004/Message%20to%20potential%20users%20of%20these%20data%20(31%20Aug%202005).pdf</p> <p>NOAA scale</p> |
|---|---------------------------------------------------------------------------------------------------------------------------------------------------------------------------------------------------------------------------------------------------------------------------------------------------------------------------------------------------------|--------------------------------------------------------------------------------------------------------------------------------------------------------------------------------------------------------------------------------------------------------------------------------------------------------------------------------------------------------------------------------------------------------------------------------------------------------------------------------------------------------------------------------------------------------------------------------------------------------------------------------------------------------------------------------------------------------------------------------------------------------------------------------------------------------------------------------------------------------------------------------------------------------------------------------------------------------------------------------------------------------------------------------------------------------------------------------------------------------------------------------------------------------------------------------------------------------------------------------------------------------------------------------------------------------------------------------------------------------------------------------------------------------------------------------------------------------------------------------------------------------------------------------------------------------------------------------------------|

|    |                                  |                                                                                                                                                                                                                                                                                                                                                                                                                                                                                                                                                                                    |
|----|----------------------------------|------------------------------------------------------------------------------------------------------------------------------------------------------------------------------------------------------------------------------------------------------------------------------------------------------------------------------------------------------------------------------------------------------------------------------------------------------------------------------------------------------------------------------------------------------------------------------------|
| 10 | Platform type and name           | Ship, NOAA Ship Ronald H. Brown                                                                                                                                                                                                                                                                                                                                                                                                                                                                                                                                                    |
|    | Expedition name                  | RB-99-06 (BACPAC 99) (Kwajalein, Marshall Islands- Seattle, Washington, North Pacific, 14.09.1999-23.10.1999)                                                                                                                                                                                                                                                                                                                                                                                                                                                                      |
|    | Cruise start date (UTC)          | 9/14/1999                                                                                                                                                                                                                                                                                                                                                                                                                                                                                                                                                                          |
|    | EXPOCODE                         | 33RO19990914                                                                                                                                                                                                                                                                                                                                                                                                                                                                                                                                                                       |
|    | Dataset creator                  | Daniel B. King                                                                                                                                                                                                                                                                                                                                                                                                                                                                                                                                                                     |
|    | PI contact details               | James H. Butler, NOAA, James.H.Butler@noaa.gov                                                                                                                                                                                                                                                                                                                                                                                                                                                                                                                                     |
|    | Data set origin                  | Host data centre: ftp://ftp.cmdl.noaa.gov/hats/ocean/ (Download: March 2010)                                                                                                                                                                                                                                                                                                                                                                                                                                                                                                       |
|    | Relevant publications            | 1) Butler, J.H., King, D.B., Lobert, J.M., Montzka, S.A., Yvon-Lewis, S.A., Hall, B.D., Warwick, N.J., Mondeel, D.J., Aydin, M. and Elkins, J.W., Oceanic distributions and emissions of short-lived halocarbons, Global Biochemical Cycles, Vol. 21, GB1023 (2006)<br>2) ftp://ftp.cmdl.noaa.gov/hats/ocean/Ocean%20GCMS%20Data%201994-2004/Message%20to%20potential%20users%20of%20these%20data%20(31%20Aug%202005).pdf                                                                                                                                                          |
|    | Sampling technique               | equilibrator (trapping of gases from equilibrated seawater and air on adsorbents)                                                                                                                                                                                                                                                                                                                                                                                                                                                                                                  |
|    | Analysis and detection technique | Gas chromatography / mass spectrometer (GC/MS) (HCFC-22, CFC-12, CH <sub>3</sub> Cl, CFC-114, Halon-1211, CH <sub>3</sub> Br, CFC-11, CH <sub>3</sub> I, Isoprene, CFC-113, CH <sub>2</sub> Cl <sub>2</sub> , CH <sub>2</sub> BrCl, CHCl <sub>3</sub> , CH <sub>3</sub> CCl <sub>3</sub> , C <sub>6</sub> H <sub>6</sub> , CCl <sub>4</sub> , C <sub>2</sub> HCl <sub>3</sub> , CH <sub>2</sub> Br <sub>2</sub> , CH <sub>2</sub> ICl, C <sub>7</sub> H <sub>8</sub> , CHBr <sub>2</sub> Cl, C <sub>2</sub> Cl <sub>4</sub> , CHBr <sub>3</sub> , CH <sub>2</sub> I <sub>2</sub> ) |
|    | Calibration technique            | Gas standard,<br>ftp://ftp.cmdl.noaa.gov/hats/ocean/Ocean%20GCMS%20Data%201994-2004/Message%20to%20potential%20users%20of%20these%20data%20(31%20Aug%202005).pdf                                                                                                                                                                                                                                                                                                                                                                                                                   |
|    | Standard referred to             | NOAA scale                                                                                                                                                                                                                                                                                                                                                                                                                                                                                                                                                                         |

|    |                                  |                                                                                                                                                                                                                 |
|----|----------------------------------|-----------------------------------------------------------------------------------------------------------------------------------------------------------------------------------------------------------------|
| 11 | Platform type and name           | Ship, RV Celtic Explorer                                                                                                                                                                                        |
|    | Expedition name                  | Marine Aerosol Production (MAP) cruise                                                                                                                                                                          |
|    | Cruise start date (UTC)          | 6/11/2006                                                                                                                                                                                                       |
|    | EXPOCODE                         | 45CE20060611                                                                                                                                                                                                    |
|    | Dataset creator                  | Charlotte Jones                                                                                                                                                                                                 |
|    | PI contact details               | Lucy Carpenter, Department of Chemistry, University of York, email<br>ljc4@york.ac.uk                                                                                                                           |
|    | Data set origin                  | Mail submission: Charlotte Jones, cej103@york.ac.uk, 10/2010                                                                                                                                                    |
|    | Relevant publications            | 1) Carpenter, L. J., Jones, C. E., Dunk, R. M., Hornsby, K. E. and Woeltjen, J.:<br>Air-sea fluxes of biogenic bromine from the tropical and North Atlantic<br>Ocean, Atmos. Chem. Phys., 9, 5, 1805-1816, 2009 |
|    | Sampling technique               | air pump/pre-concentration and purge and trap                                                                                                                                                                   |
|    | Analysis and detection technique | GC/MS                                                                                                                                                                                                           |
|    | Calibration technique            | permeation oven / in-house halocarbon standard                                                                                                                                                                  |
|    | Standard referred to             | in house (Wevill & Carpenter, 2004)                                                                                                                                                                             |

|    |                                                                                                                                                                                                                                                               |                                                                                                                                                                                                                                                                                                                                                                                                                                                                                                                                                                                                                                                                                                                                                                                                                                                                                                   |
|----|---------------------------------------------------------------------------------------------------------------------------------------------------------------------------------------------------------------------------------------------------------------|---------------------------------------------------------------------------------------------------------------------------------------------------------------------------------------------------------------------------------------------------------------------------------------------------------------------------------------------------------------------------------------------------------------------------------------------------------------------------------------------------------------------------------------------------------------------------------------------------------------------------------------------------------------------------------------------------------------------------------------------------------------------------------------------------------------------------------------------------------------------------------------------------|
| 12 | Platform type and name<br>Cruise start date (UTC)<br>EXPOCODE<br>Dataset creator<br>PI contact details<br>Data set origin<br>Relevant publications<br>Sampling technique<br>Analysis and detection technique<br>Calibration technique<br>Standard referred to | Ship, RHaMBLe cruise (RRS Discovery cruise 319)<br>5/20/2007<br>74DI20070520<br>Charlotte Jones<br>Lucy Carpenter, Department of Chemistry, University of York,<br>ljc4@york.ac.uk<br>Host data centre: BODC<br>( <a href="http://www.bodc.ac.uk/projects/uk/uksolas/data_inventories/cruise/d319/">http://www.bodc.ac.uk/projects/uk/uksolas/data_inventories/cruise/d319/</a> )<br>Mail submission: Charlotte Jones, cej103@york.ac.uk, 10/2010<br>1) Jones, CE et al. Quantifying the contribution of marine organic gases to<br>atmospheric iodine, Geophys Res Lett, 3, L18804, 2010; Carpenter, LJ et al.<br>Air-sea fluxes of biogenic bromine from the tropical and North Atlantic<br>Ocean, Atmos. Chem. Phys., 9, 5, 1805-1816, 2009<br>air pump/pre-concentration and purge and trap<br>GC/MS<br>permeation oven / in-house halocarbon standard<br>in house (Wevill & Carpenter, 2004) |
| 13 | Platform type and name<br>Expedition name<br>EXPOCODE<br>Dataset creator<br>PI contact details<br>Data set origin<br>Sampling technique<br>Analysis and detection technique<br>Calibration technique                                                          | Ship, R/V Poseidon<br>DRIVE<br>06PO20100531 / 06PO20100619<br>Helmke Hepach (water),<br>Helmke Hepach, GEOMAR, hhepach@geomar.de<br>Host data centre: Pangaea<br>Mail submission: 18.08.2011, hhepach@ifm-geomar.de<br>Underway and CTD<br>GC-MS (Single Ion Mode), Purge-and-trap-system<br>liquid standards (water), air standards (air), NOAA scale                                                                                                                                                                                                                                                                                                                                                                                                                                                                                                                                            |

|    |                                                                                                                                                                                                                                 |                                                                                                                                                                                                                                                                                                                                                                                                                                                                                                                                                                                                                                                                                                                                                                                                                                 |
|----|---------------------------------------------------------------------------------------------------------------------------------------------------------------------------------------------------------------------------------|---------------------------------------------------------------------------------------------------------------------------------------------------------------------------------------------------------------------------------------------------------------------------------------------------------------------------------------------------------------------------------------------------------------------------------------------------------------------------------------------------------------------------------------------------------------------------------------------------------------------------------------------------------------------------------------------------------------------------------------------------------------------------------------------------------------------------------|
| 14 | Platform type and name<br>Expedition name<br>Cruise start date (UTC)<br>EXPOCODE<br>Dataset creator<br>PI contact details<br>Data set origin<br>Sampling technique<br>Analysis and detection technique<br>Calibration technique | Ship, RV Maria S. Merian<br>MSM18/3<br>6/22/2011<br>06M220110622<br>Helmke Hepach<br>Helmke Hepach, GEOMAR, hhepach@geomar.de<br>mail submission, 18.08.2011 hhepach@geomar.de<br>Underway and CTD<br>GC-MS (Single Ion Mode), Purge-and-Trap-system<br>liquid standards                                                                                                                                                                                                                                                                                                                                                                                                                                                                                                                                                        |
| 15 | Platform type and name<br>Expedition name<br>Cruise start date (UTC)<br>EXPOCODE<br>PI contact details<br><br>Relevant publications<br><br>Sampling technique<br><br><br><br>Analysis and detection technique                   | SHIP, Polarstern<br>ANT X/1<br>11/14/1991<br>06AQ19911114<br>Heumann, Klaus G., Johannes Gutenberg-University Mainz, heumann@uni-mainz.de<br><br>Schall, C. et al (1997), Biogenic volatile organoiodine and organobromine hydrocarbons in the Atlantic Ocean from 42°N to 72° S, Fresenius J Anal Chem (1997) 359: 298- 305<br><br>A 10L steel bucket was used to collect the surface water samples, samples were filtered through a 200µm pore size filter to exclude large particles and corresponding biological species and then each sample was divided into two portions to determine the concentrations of both chlorophyll- a and the different iodinated and brominated organic compounds.<br><br>purge and trap-system with subsequent gas chromatographic separation and detection by an electron capture detector, |



|           |                                  |                                                                    |
|-----------|----------------------------------|--------------------------------------------------------------------|
| <b>16</b> | Platform type and name           | Ship, James Clark Ross                                             |
|           | Expedition name                  | SAMS northern seas programme (JR75)                                |
|           | Cruise start date (UTC)          | 6/18/2002 13:00                                                    |
|           | EXPOCODE                         | 74JC20020618                                                       |
|           | Dataset creator                  | Claire Hughes                                                      |
|           | PI contact details               | Claire Hughes, claire.hughes@uea.ac.uk                             |
|           | Data set origin                  | Mail submission: Chris Adams, Christopher.Adams@uea.ac.uk, 09/2009 |
|           | Relevant publications            | Manuscript submitted to GBC                                        |
|           | Sampling technique               | Underway non-tox (6m)                                              |
|           | Analysis and detection technique | Cryo-trap, GC/MS                                                   |
|           | Calibration technique            | Liquid standards diluted in methanol                               |
| <b>17</b> | Platform type and name           | Ship, James Clark Ross                                             |
|           | Expedition name                  | SAMS northern seas programme (JR75)                                |
|           | Cruise start date (UTC)          | 11/24/2004 20:35                                                   |
|           | EXPOCODE                         | 74JC20041124                                                       |
|           | Dataset creator                  | Claire Hughes                                                      |
|           | PI contact details               | Claire Hughes, claire.hughes@uea.ac.uk                             |
|           | Data set origin                  | Mail submission: Chris Adams, Christopher.Adams@uea.ac.uk, 09/2009 |
|           | Sampling technique               | Underway non-tox (6m)                                              |
|           | Analysis and detection technique | Cryo-trap, GC/MS                                                   |
|           | Calibration technique            | Liquid standards diluted in methanol                               |

|           |                                  |                                                                                                                                                                  |
|-----------|----------------------------------|------------------------------------------------------------------------------------------------------------------------------------------------------------------|
| <b>18</b> | Platform type and name           | SHIP, Alkor                                                                                                                                                      |
|           | Expedition name                  | Alkor 20                                                                                                                                                         |
|           | Cruise start date (UTC)          | 9/17/1991                                                                                                                                                        |
|           | EXPOCODE                         | 06A619910917                                                                                                                                                     |
|           | Dataset creator                  | Joachim Kuß                                                                                                                                                      |
|           | PI contact details               | Joachim Kuß, joachim.kuss@io-warnemuende.de                                                                                                                      |
|           | Relevant publications            | Kuss, J., Volatile halogenated hydrocarbons: Exchange processes between atmosphere and seawater, Ph.D.thesis, Christian Albrecht University, Kiel, Germany, 1994 |
|           | Sampling technique               | stainless steel Close open Close waterscoop (COC), Kieler pumpsystem (KPS)                                                                                       |
|           | Analysis and detection technique | glass fibre filter and extraction with a liquid, solid or gaseous eluent                                                                                         |
|           | Calibration technique            | adaptation curve due to the measured points, linear regression                                                                                                   |
|           |                                  |                                                                                                                                                                  |
| <b>19</b> | Platform type and name           | SHIP, Alkor                                                                                                                                                      |
|           | Expedition name                  | Alkor17                                                                                                                                                          |
|           | Cruise start date (UTC)          | 3/24/1991                                                                                                                                                        |
|           | EXPOCODE                         | 06A619910324                                                                                                                                                     |
|           | Dataset creator                  | Joachim Kuß                                                                                                                                                      |
|           | PI contact details               | Joachim Kuß, joachim.kuss@io-warnemuende.de                                                                                                                      |
|           | Relevant publications            | Kuss, J., Volatile halogenated hydrocarbons: Exchange processes between atmosphere and seawater, Ph.D.thesis, Christian Albrecht University, Kiel, Germany, 1994 |
|           | Sampling technique               | stainless steel Close open Close waterscoop (COC), Kieler pumpsystem (KPS)                                                                                       |
|           | Analysis and detection technique | glass fibre filter and extraction with a liquid, solid or gaseous eluent                                                                                         |
|           | Calibration technique            | adaptation curve due to the measured points, linear regression                                                                                                   |

|    |                                  |                                                                                                                                                                                                 |
|----|----------------------------------|-------------------------------------------------------------------------------------------------------------------------------------------------------------------------------------------------|
| 20 | Platform type and name           | Ship, RRS Discovery (DISCO 200)                                                                                                                                                                 |
|    | Expedition name                  | ADOX (Antarctic Deep Outflow Experiment, part of UK WOCE)                                                                                                                                       |
|    | Cruise start date (UTC)          | 6 Feb 1993 1993 (6/2/1993)                                                                                                                                                                      |
|    | EXPOCODE                         | 74DI19930206                                                                                                                                                                                    |
|    | Dataset creator                  | Sue Turner, University of East Anglia, s.tuner@uea.ac.uk                                                                                                                                        |
|    | PI contact details               | Peter Liss, University of East Anglia, p.liss@uea.ac.uk                                                                                                                                         |
|    | Data set origin                  | Host data centre: BODC (www.bodc.ac.uk) (Download: March 2010)                                                                                                                                  |
|    | Relevant publications            | Chuck, A. L., S. M. Turner, and P. S. Liss (2005), Oceanic distributions and air-sea fluxes of biogenic halocarbons in the open ocean, J. Geophys. Res., 110, C10022, doi:10.1029/2004JC002741. |
|    | Sampling technique               | all samples from ship's pumped non-tox supply                                                                                                                                                   |
|    | Analysis and detection technique | Purge and trap, GC-ECD                                                                                                                                                                          |

|    |                                                                                                                                                                                                                                                              |                                                                                                                                                                                                                                                                                                                                                                                                                                                                                                                                                                                                                                                                                                                                                                                                                                                                                                                                                                                                                                                                                                                                                                                                                                                                                                                                                                                                                                                                                                                                                                  |
|----|--------------------------------------------------------------------------------------------------------------------------------------------------------------------------------------------------------------------------------------------------------------|------------------------------------------------------------------------------------------------------------------------------------------------------------------------------------------------------------------------------------------------------------------------------------------------------------------------------------------------------------------------------------------------------------------------------------------------------------------------------------------------------------------------------------------------------------------------------------------------------------------------------------------------------------------------------------------------------------------------------------------------------------------------------------------------------------------------------------------------------------------------------------------------------------------------------------------------------------------------------------------------------------------------------------------------------------------------------------------------------------------------------------------------------------------------------------------------------------------------------------------------------------------------------------------------------------------------------------------------------------------------------------------------------------------------------------------------------------------------------------------------------------------------------------------------------------------|
| 21 | <p>Platform type and name</p> <p>Platform name</p> <p>Cruise start date (UTC)</p> <p>EXPOCODE</p> <p>Dataset creator</p> <p>PI contact details</p> <p>Data set origin</p> <p>Relevant publications</p> <p>Sampling technique</p> <p>Standard referred to</p> | <p>Ship, R/V Knorr</p> <p>R/V Knorr</p> <p>7/16/1997</p> <p>316N19970716</p> <p>Robert Moore</p> <p>Moore, Robert, Dalhousie University, Halifax, robert.moore@dal.ca</p> <p>Mail submission: Jenny Lang, jlang5647@googlemail.com, 11/ 2010</p> <p>Moore, R.M. (2001) Trichloroethylene and tetrachloroethylene inAtlantic waters.<br/>Journal of Geophysical Research, 106(11), 27135-27143.</p> <p>Vertical profiles collected in rosette mounted Niskin bottles during ascent of samplers. Drawn into 100ml glass syringes and stored underwater until sampled, Water vapour removed by moist helium first passed through a short tube jacketed with 1oC water and then through a 4cm drying tube containing magnesium perchlorate. Then passed through 30cm trap of stainless steel tubing held over -150°C liquid nitrogen. Trap heated rapidly to 15oC and carrier gas stream (5mL min-1) flowed through trap. Separation of volatiles achieved on a pair of DB-624 columns. Compounds detected using a VG MD800 Mass selective detector, Purge and trap and GC-MS: Volatiles released by a stream of helium (40mL min-1) passing through a glass frit in the purge vessel. Sample heated during 12min purge to 40°C, Standard gas was injected into the analytical system in amounts of 25-100 µL. Standard of the halogenated compounds in CO2 prepared gravimetrically and diluted in nitrogen to yield conc in range of 30-400nmol mol-1. Accuracy of the standard +/- 6.5%</p> <p>CTD, Oxygen, Silicate, Nitrate, Nitrite, phosphate, alkalinity</p> |
|----|--------------------------------------------------------------------------------------------------------------------------------------------------------------------------------------------------------------------------------------------------------------|------------------------------------------------------------------------------------------------------------------------------------------------------------------------------------------------------------------------------------------------------------------------------------------------------------------------------------------------------------------------------------------------------------------------------------------------------------------------------------------------------------------------------------------------------------------------------------------------------------------------------------------------------------------------------------------------------------------------------------------------------------------------------------------------------------------------------------------------------------------------------------------------------------------------------------------------------------------------------------------------------------------------------------------------------------------------------------------------------------------------------------------------------------------------------------------------------------------------------------------------------------------------------------------------------------------------------------------------------------------------------------------------------------------------------------------------------------------------------------------------------------------------------------------------------------------|

|    |                                                                                                                                                                                                                                                                                                                                     |                                                                                                                                                                                                                                                                                                                                                                                                                                                                                                                                                                                                                                                                                                                                                                                                                                                                                                                                                                                                                                                                                                                                                                                                                                                                                                                                                                                                                                                                                                                                                       |
|----|-------------------------------------------------------------------------------------------------------------------------------------------------------------------------------------------------------------------------------------------------------------------------------------------------------------------------------------|-------------------------------------------------------------------------------------------------------------------------------------------------------------------------------------------------------------------------------------------------------------------------------------------------------------------------------------------------------------------------------------------------------------------------------------------------------------------------------------------------------------------------------------------------------------------------------------------------------------------------------------------------------------------------------------------------------------------------------------------------------------------------------------------------------------------------------------------------------------------------------------------------------------------------------------------------------------------------------------------------------------------------------------------------------------------------------------------------------------------------------------------------------------------------------------------------------------------------------------------------------------------------------------------------------------------------------------------------------------------------------------------------------------------------------------------------------------------------------------------------------------------------------------------------------|
| 22 | <p>Platform type and name</p> <p>Expedition name</p> <p>Cruise start date (UTC)</p> <p>EXPOCODE</p> <p>Dataset creator</p> <p>PI contact details</p> <p>Data set origin</p> <p>Relevant publications</p> <p>Sampling technique</p> <p>Analysis and detection technique</p> <p>Calibration technique</p> <p>Standard referred to</p> | <p>Ship, Ronald Brown</p> <p>Gas Ex 98</p> <p>5/25/1998</p> <p>33RO19980525</p> <p>Robert Moore</p> <p>Moore, Robert, Dalhousie University, Halifax, robert.moore@dal.ca</p> <p>Mail submission: Jenny Lang, jlang5647@googlemail.com, 11/ 2010</p> <p>Moore, R.M. (2001) Trichloroethylene and tetrachloroethylene inAtlantic waters.<br/>Journal of Geophysical Research, 106(11), 27135-27143.</p> <p>Vertical profiles collected in rosette mounted Niskin bottles during ascent of samplers. Drawn into 100ml glass syringes and stored underwater until sampled water vapour removed by moist helium first passed through a short tube jacketed with 1°C water and then through a 4cm drying tube containing magnesium perchlorate. Then passed through 30cm trap of stainless steel tubing held over -150°C liquid nitrogen. Trap heated rapidly to 15°C and carrier gas stream (5mL min<sup>-1</sup>) flowed through trap. Separation of volatiles achieved on a pair of DB-624 columns. Compounds detected using a VG MD800 Mass selective detector</p> <p>Purge and trap and GC-MS: Volatiles released by a stream of helium (40mL min<sup>-1</sup>) passing through a glass frit in the purge vessel. Sample heated during 12min purge to 40°C.</p> <p>Standard gas was injected into the analytical system in amounts of 25-100 µL. Standard of the halogenated compounds in CO<sub>2</sub> prepared gravimetrically and diluted in nitrogen to yield conc in range of 30-400nmol mol<sup>-1</sup>. Accuracy of the standard +/- 6.5%</p> |
|----|-------------------------------------------------------------------------------------------------------------------------------------------------------------------------------------------------------------------------------------------------------------------------------------------------------------------------------------|-------------------------------------------------------------------------------------------------------------------------------------------------------------------------------------------------------------------------------------------------------------------------------------------------------------------------------------------------------------------------------------------------------------------------------------------------------------------------------------------------------------------------------------------------------------------------------------------------------------------------------------------------------------------------------------------------------------------------------------------------------------------------------------------------------------------------------------------------------------------------------------------------------------------------------------------------------------------------------------------------------------------------------------------------------------------------------------------------------------------------------------------------------------------------------------------------------------------------------------------------------------------------------------------------------------------------------------------------------------------------------------------------------------------------------------------------------------------------------------------------------------------------------------------------------|

|    |                                  |                                                                                                                                                                                                                                                                                                                                                                                                                                                                                                                                                                                                                                                                                                                                                                             |
|----|----------------------------------|-----------------------------------------------------------------------------------------------------------------------------------------------------------------------------------------------------------------------------------------------------------------------------------------------------------------------------------------------------------------------------------------------------------------------------------------------------------------------------------------------------------------------------------------------------------------------------------------------------------------------------------------------------------------------------------------------------------------------------------------------------------------------------|
| 23 | Platform type and name           | Ship, CCGS Hudson                                                                                                                                                                                                                                                                                                                                                                                                                                                                                                                                                                                                                                                                                                                                                           |
|    | Expedition name                  | Lab. Sea, Hfx Line                                                                                                                                                                                                                                                                                                                                                                                                                                                                                                                                                                                                                                                                                                                                                          |
|    | Cruise start date (UTC)          | 5/30/2001                                                                                                                                                                                                                                                                                                                                                                                                                                                                                                                                                                                                                                                                                                                                                                   |
|    | EXPOCODE                         | 18HU20010530                                                                                                                                                                                                                                                                                                                                                                                                                                                                                                                                                                                                                                                                                                                                                                |
|    | Dataset creator                  | Robert Moore                                                                                                                                                                                                                                                                                                                                                                                                                                                                                                                                                                                                                                                                                                                                                                |
|    | PI contact details               | Moore, Robert, Dalhousie University, Halifax, robert.moore@dal.ca                                                                                                                                                                                                                                                                                                                                                                                                                                                                                                                                                                                                                                                                                                           |
|    | Data set origin                  | Mail submission: Jenny Lang, jlang5647@googlemail.com, 11/ 2010                                                                                                                                                                                                                                                                                                                                                                                                                                                                                                                                                                                                                                                                                                             |
|    | Relevant publications            | Moore, R.M. (2004), Dichloromethane in North Atlantic Waters, J. Geophys. Res., 109,IC09004, doi:10.1029/2004JC002397.                                                                                                                                                                                                                                                                                                                                                                                                                                                                                                                                                                                                                                                      |
|    | Sampling technique               | Niskin bottles. Stored in 100ml glass syringes under water until sampled                                                                                                                                                                                                                                                                                                                                                                                                                                                                                                                                                                                                                                                                                                    |
|    | Analysis and detection technique | Analysis within 20hrs after sampling, typically within 6hrs, Samples forced through a glass fibre filter into a calibrated pipette and then passed into water jacketed purge vessel maintained at 40°C, Sample purged for 12mins with high purity helium and carried through a condenser to reduce the water vapour followed by a drying tube packed with magnesium perchlorate, Trapping achieved in a coiled steel tube held at -150°C over liquid nitrogen, Trap electrically heated and trapped gases transferred in a stream of HE to a pair of chromatographic columns and then to a Fisons MD800 quadrupole MS, A correction had to be applied to the soluble CH <sub>2</sub> CL <sub>2</sub> for incomplete purging (85%). No correction needed for other compounds |
|    | Calibration technique            | Injection of known volumes of a gravimetrically prepared standard via a septum port                                                                                                                                                                                                                                                                                                                                                                                                                                                                                                                                                                                                                                                                                         |
|    | Standard referred to             | Gravimetrically prepared standards                                                                                                                                                                                                                                                                                                                                                                                                                                                                                                                                                                                                                                                                                                                                          |

|    |                                  |                                                                                                                                                                                                                                                                                                                                                                                                                                   |
|----|----------------------------------|-----------------------------------------------------------------------------------------------------------------------------------------------------------------------------------------------------------------------------------------------------------------------------------------------------------------------------------------------------------------------------------------------------------------------------------|
| 24 | Platform type and name           | Coastal Observation                                                                                                                                                                                                                                                                                                                                                                                                               |
|    | Cruise start date (UTC)          | 22.01.2008, 10:30                                                                                                                                                                                                                                                                                                                                                                                                                 |
|    | Dataset creator                  | Anna Orlikowska                                                                                                                                                                                                                                                                                                                                                                                                                   |
|    | PI contact details               | Anna Orlikowska, IOW Rostock, anna.orlikowska@io-warnemuende.de                                                                                                                                                                                                                                                                                                                                                                   |
|    | Data set origin                  | Mail submission: Anna Orlikowska, Anna.Orlikowska@io-warnemuende.de, 07/2010                                                                                                                                                                                                                                                                                                                                                      |
|    | Relevant publications            | Orlikowska, A., D.E. Schulz-Bull (2009) Seasonal variations of volatile organic compounds in the coastal Baltic Sea. Environmental Chemistry, 6, 495 -507                                                                                                                                                                                                                                                                         |
|    | Sampling technique               | Purge and Trap (Purge gas: Helium). Flow rate through sample: 120ml/min. Trap: Tenax GR. Water removal from gas by two Nafion Dryers.                                                                                                                                                                                                                                                                                             |
|    | Analysis and detection technique | GC-MS. Carrier gas: high purity helium. (const. Flow rate at 2ml/min). VOC-Separation in RTX-VGC capillary column. MS: Thermo DSQ Quadrupole MS.                                                                                                                                                                                                                                                                                  |
|    | Calibration technique            | A standard mixture of 33VOCs of known concentration in 1 L of water was injected by purge and trap before analysis of a sample. Calibration was performed every week. Quantification of VOCs was based on the peak area of the individual compound in relation to the peak area of the external standard measured under the same conditions. The compounds were quantified if the signal to noise ratio (S/N) was greater than 3. |
|    | Standard referred to             | prepared volumetrically by serial dilution of pure compounds in methanol.                                                                                                                                                                                                                                                                                                                                                         |

|    |                                  |                                                                                                                                                                                                                          |
|----|----------------------------------|--------------------------------------------------------------------------------------------------------------------------------------------------------------------------------------------------------------------------|
| 25 | Platform type and name           | Ship, Meteor                                                                                                                                                                                                             |
|    | Expedition name                  | M55 (Curacao-Douala, 12.10.-17.11.2002)                                                                                                                                                                                  |
|    | Cruise start date (UTC)          | 10/12/2002                                                                                                                                                                                                               |
|    | EXPOCODE                         | 06M320021012                                                                                                                                                                                                             |
|    | Dataset creator                  | Birgit Quack                                                                                                                                                                                                             |
|    | PI contact details               | Birgit Quack, GEOMAR, bquack@geomar.de                                                                                                                                                                                   |
|    | Data set origin                  | Mail submission: B. Quack, bquack@geomar.de, 08/2010                                                                                                                                                                     |
|    | Relevant publications            | Quack, B., Atlas, E., Petrick, G., Stroud, V., Schauffler, S. and Wallace, D.W.R. (2004), Oceanic bromoform sources for the tropical atmosphere, Geophysical Research Letters, Vol. 31, L23S05, doi:10.1029/2004GL020597 |
|    | Sampling technique               | water: glass bottles with Teflon seals, air: online from bow on cooled (-70°C) glass beads                                                                                                                               |
| 26 | Analysis and detection technique | GC/MS (SIM), water: purge and trap, 30 ml/min He, 70°C (all capillary column), 0,56mm, deactivated; air: thermal desorption off adsorbent                                                                                |
|    | Calibration technique            | liquid standard (volumetrically prepared in ultra pure water)                                                                                                                                                            |
|    | Standard referred to             | RSMAS scale                                                                                                                                                                                                              |
|    | Platform type and name           | Ship, Meteor                                                                                                                                                                                                             |
|    | Expedition name                  | M60_5 (Fort-de-France - Lisbon, 09.03.-15.04.2004)                                                                                                                                                                       |
|    | Cruise start date (UTC)          | 3/9/2004                                                                                                                                                                                                                 |
|    | EXPOCODE                         | 06M320040309                                                                                                                                                                                                             |
|    | Dataset creator                  | Birgit Quack                                                                                                                                                                                                             |
|    | PI contact details               | Birgit Quack, GEOMAR, bquack@geomar.de                                                                                                                                                                                   |
|    | Data set origin                  | Mail submission: B. Quack, bquack@geomar.de, 08/2010                                                                                                                                                                     |
|    | Sampling technique               | water: glass bottles with Teflon seals, air: online from bow on cooled (-70°C) glass beads                                                                                                                               |
|    | Analysis and detection technique | GC/MS (SIM), water: purge and trap, 30 ml/min He, 70°C (all capillary column), 0,56mm, deactivated; air: thermal desorption off adsorbent                                                                                |
|    | Calibration technique            | liquid standard (volumetrically prepared in methanol)                                                                                                                                                                    |
|    | Standard referred to             | RSMAS scale                                                                                                                                                                                                              |



|    |                                                                                                                                                                                                                                                                                                          |                                                                                                                                                                                                                                                                                                                                                                                                                                                                                                                                                                                                                                                                                                                                                                                                                                                                                                                                                                                                                |
|----|----------------------------------------------------------------------------------------------------------------------------------------------------------------------------------------------------------------------------------------------------------------------------------------------------------|----------------------------------------------------------------------------------------------------------------------------------------------------------------------------------------------------------------------------------------------------------------------------------------------------------------------------------------------------------------------------------------------------------------------------------------------------------------------------------------------------------------------------------------------------------------------------------------------------------------------------------------------------------------------------------------------------------------------------------------------------------------------------------------------------------------------------------------------------------------------------------------------------------------------------------------------------------------------------------------------------------------|
| 27 | Platform type and name<br>Expedition name<br>Cruise start date (UTC)<br>EXPOCODE<br>Dataset creator<br>PI contact details<br>Relevant publications<br><br><br><br><br>Mail submission<br>Sampling technique<br><br>Analysis and detection technique<br><br>Calibration technique<br>Standard referred to | Ship, Poseidon<br>P320_1 (Las Palmas - Mindelo, 21.03.2005-07.04.2005)<br>3/21/2005<br>06PO20050321<br>Birgit Quack<br>Birgit Quack, GEOMAR, bquack@geomar.de<br>1) Quack, B., Peeken, I., Petrick, G., and Nachtigall, K. (2007), Oceanic distribution and sources of bromoform and dibromomethane in the Mauritanian upwelling, J. Geophys. Res., 112, C10006, doi:10.1029/2006JC003803<br><br>2) Quack, B., E. Atlas, G. Petrick, and D. W. R. Wallace (2007), Bromoform and dibromomethane above the Mauritanian upwelling: Atmospheric distributions and oceanic emissions, J. Geophys. Res., 112, D09312, doi:10.1029/2006JD007614<br><br>B. Quack, bquack@geomar.de, 08/2010<br>water: glass bottles with Teflon seals, air: online from bow on cooled (-70°C) glass beads<br><br>GC/MS (SIM), water: purge and trap, 30 ml/min He, 70°C (all capillary column), 0,56mm, deactivated; air: thermal desorption off adsorbent<br><br>liquid standard (volumetrically prepared in methanol)<br>RSMAS scale |
|----|----------------------------------------------------------------------------------------------------------------------------------------------------------------------------------------------------------------------------------------------------------------------------------------------------------|----------------------------------------------------------------------------------------------------------------------------------------------------------------------------------------------------------------------------------------------------------------------------------------------------------------------------------------------------------------------------------------------------------------------------------------------------------------------------------------------------------------------------------------------------------------------------------------------------------------------------------------------------------------------------------------------------------------------------------------------------------------------------------------------------------------------------------------------------------------------------------------------------------------------------------------------------------------------------------------------------------------|



|           |                                  |                                                                                                                                                                                                                                                     |
|-----------|----------------------------------|-----------------------------------------------------------------------------------------------------------------------------------------------------------------------------------------------------------------------------------------------------|
| <b>30</b> | Platform type and name           | Ship, Discovery                                                                                                                                                                                                                                     |
|           | Expedition name                  | ASCOE                                                                                                                                                                                                                                               |
|           | Cruise start date (UTC)          | 6/6/1998                                                                                                                                                                                                                                            |
|           | EXPOCODE                         | 74E319980606                                                                                                                                                                                                                                        |
|           | Dataset creator                  | Jonathan Baker                                                                                                                                                                                                                                      |
|           | PI contact details               | Claire Reeves, University of East Anglia, c.reeves@uea.ac.uk                                                                                                                                                                                        |
|           | Data set origin                  | BODC (www.bodc.ac.uk)(Download: March 2010)                                                                                                                                                                                                         |
|           | Relevant publications            | Baker et al., 1999 Marine Chemistry. 64. 267-285,<br><a href="http://www.sciencedirect.com/science/article/pii/S0304420398000772">http://www.sciencedirect.com/science/article/pii/S0304420398000772</a> , doi:<br>10.1016/S0304-4203(98)00077-2    |
|           | Sampling technique               | unfiltered water samples                                                                                                                                                                                                                            |
| <b>31</b> | Analysis and detection technique | Purge and trap, ECD detection                                                                                                                                                                                                                       |
|           | Platform type and name           | Ship. R/V Polarstern                                                                                                                                                                                                                                |
|           | Expedition name                  | ANT VI/2                                                                                                                                                                                                                                            |
|           | Cruise start date (UTC)          | 10/26/1987                                                                                                                                                                                                                                          |
|           | EXPOCODE                         | 06AQ19871026                                                                                                                                                                                                                                        |
|           | Dataset creator                  | Werner Reifenhäuser                                                                                                                                                                                                                                 |
|           | PI contact details               | Werner Reifenhäuser, Bayrisches Staatsministerium fuer Umwelt und<br>Gesundheit, Werner.Reifenhaeuser@stmug.bayern.de                                                                                                                               |
|           | Relevant publications            | Gaschromatische Bestimmung halogenierter Kohlenwasserstoffe in der<br>antarktischen Atmosphäre, in südpolaren Gewässern sowie in anthropogen<br>belasteter Luft, Dissertation von 1989                                                              |
|           | Sampling technique               | continuous sampling through a seawater-tube in the bow, hard glass bulbs have<br>been filled with 50 ml of seawater, sealed with a butane gas burner (Fa.<br>Camping-gaz). To protect sample from light , enroled with alufilm, frozen at -<br>18°C |
|           | Analysis and detection technique | gaschromatographical separation technique                                                                                                                                                                                                           |
|           | Calibration technique            | Weighing out the halocarbons in ethylenglycol . Calibration filled in glass<br>bulbs and closed with Teflon adapter                                                                                                                                 |

|    |                                                                                                                                                                                                                                                                                                               |                                                                                                                                                                                                                                                                                                                                                                                                                                                                                                                                                                                                                                                                                                                                                                                                                                                                                                                                                                                                                                                                                                     |
|----|---------------------------------------------------------------------------------------------------------------------------------------------------------------------------------------------------------------------------------------------------------------------------------------------------------------|-----------------------------------------------------------------------------------------------------------------------------------------------------------------------------------------------------------------------------------------------------------------------------------------------------------------------------------------------------------------------------------------------------------------------------------------------------------------------------------------------------------------------------------------------------------------------------------------------------------------------------------------------------------------------------------------------------------------------------------------------------------------------------------------------------------------------------------------------------------------------------------------------------------------------------------------------------------------------------------------------------------------------------------------------------------------------------------------------------|
| 32 | <p>Platform type and name</p> <p>Expedition name</p> <p>Cruise start date (UTC)</p> <p>EXPOCODE</p> <p>Dataset creator</p> <p>PI contact details</p> <p>Relevant publications</p><br><p>Mail submission</p> <p>Sampling technique</p> <p>Analysis and detection technique</p><br><p>Calibration technique</p> | <p>Ship, Bilim</p> <p>IMS METU</p> <p>12/4/1993</p> <p>89BL19931204</p> <p>Toste Tanhua</p> <p>Toste Tanhua, GEOMAR, ttanhua@geomar.de</p> <p>Tanhua, T. et al (1996), Reduction of volatile halocarbons in anoxic seawater, results from a study in the black sea, marine chemistry 54, page 159- 170</p><br><p>Mail submission: Toste Tanhua, ttanhua@geomar.de, 12/2010</p> <p>Niskin samplers, mounted on a rosette with a CTD sonde</p> <p>drawn into 100 ml ground glass syringes and stored under seawater , purge and trap sample work up followed by gas chromatographic separation and detection of by electron capture detector (similar to Krysell and Nightingale [1994])</p> <p>gaseous standard was calibrated against the known conc. Of CCl<sub>4</sub> and CH<sub>3</sub>CCl<sub>3</sub> in marine air. Assigned mixing ration of 109+/- 5 ppt for CCl<sub>4</sub> and 145 +/- 7 ppt for CH<sub>3</sub>CCl<sub>3</sub>, for the others, liquid standard, gravimetrically prepared was injected into the stripping chamber through a valve with an internal loop of 2µl volume</p> |
|----|---------------------------------------------------------------------------------------------------------------------------------------------------------------------------------------------------------------------------------------------------------------------------------------------------------------|-----------------------------------------------------------------------------------------------------------------------------------------------------------------------------------------------------------------------------------------------------------------------------------------------------------------------------------------------------------------------------------------------------------------------------------------------------------------------------------------------------------------------------------------------------------------------------------------------------------------------------------------------------------------------------------------------------------------------------------------------------------------------------------------------------------------------------------------------------------------------------------------------------------------------------------------------------------------------------------------------------------------------------------------------------------------------------------------------------|



|    |                                                                                                                                                                                                                                                                         |                                                                                                                                                                                                                                                                                                                                                                                                                                                                                                                                                                                                                                                                                                                                                                                                                                                                                                                                                    |
|----|-------------------------------------------------------------------------------------------------------------------------------------------------------------------------------------------------------------------------------------------------------------------------|----------------------------------------------------------------------------------------------------------------------------------------------------------------------------------------------------------------------------------------------------------------------------------------------------------------------------------------------------------------------------------------------------------------------------------------------------------------------------------------------------------------------------------------------------------------------------------------------------------------------------------------------------------------------------------------------------------------------------------------------------------------------------------------------------------------------------------------------------------------------------------------------------------------------------------------------------|
| 34 | Platform type and name<br>Expedition name<br>Cruise start date (UTC)<br>EXPOCODE<br>Dataset creator<br>PI contact details<br>Data set origin<br>Relevant publications<br><br><br><br><br><br><br><br><br>Sampling technique<br><br><br>Analysis and detection technique | Ship, ARGOS<br>77AR<br>5/23/1991 23:30<br>77AR19910523<br>Toste Tanhua<br>Toste Tanhua, GEOMAR, ttanhua@geomar.de<br>Mail submission: Toste Tanhua, ttanhua@geomar.de, 02/2010<br>1) Krysell, M., E. Fogelqvist, and T. Tanhua (1994), Apparent removal of the transient tracer carbon tetrachloride from anoxic seawater, Geophys. Res. Letters, 21, 2511-2514.<br>2) Fogelqvist, E. (1999), Determination of volatile halocarbons in seawater, in Methods of Seawater Analysis, edited by K. Grasshoff, et al., pp. 501-519<br>3) Tanhua, T. (1997), Halogenated substances as marine tracers, Ph.D. thesis, Göteborg University, Göteborg.<br><br>1.8 L TNP samplers (Hydro-Bios) bottles. liquid standards, injected into the system through an internal volume valco valve.<br><br>see Fogelqvist, E. (1999), Determination of volatile halocarbons in seawater, in Methods of Seawater Analysis, edited by K. Grasshoff, et al., pp. 501-519 |
| 35 | Platform type and name<br>Expedition name<br>Cruise start date (UTC)<br>EXPOCODE<br>Dataset creator<br>PI contact details<br>Data set origin                                                                                                                            | Ship, Challenger<br>NSP (North Sea Project)<br>1/28/1989<br>74CH19890128<br>Sue Turner, University of East Anglia, s.turner@uea.ac.uk<br>Sue Turner, University of East Anglia, s.turner@uea.ac.uk<br>BODC (www.bodc.ac.uk) (Download: March 2010)                                                                                                                                                                                                                                                                                                                                                                                                                                                                                                                                                                                                                                                                                                 |

|    |                                                                                                                                                                                                                                                          |                                                                                                                                                                                                                                                                                                                                                                                                                                                                                                                                                                                                                       |
|----|----------------------------------------------------------------------------------------------------------------------------------------------------------------------------------------------------------------------------------------------------------|-----------------------------------------------------------------------------------------------------------------------------------------------------------------------------------------------------------------------------------------------------------------------------------------------------------------------------------------------------------------------------------------------------------------------------------------------------------------------------------------------------------------------------------------------------------------------------------------------------------------------|
| 36 | Platform type and name<br>Expedition name<br>Cruise start date (UTC)<br>EXPOCODE<br>Dataset creator<br>PI contact details<br>Data set origin<br>Relevant publications<br>Sampling technique<br>Analysis and detection technique<br>Calibration technique | Ship, R/V Polarstern<br>ANT XVIII/1<br>10/8/2000<br>06AQ20001008<br>Adele Chuck, University of East Anglia, adele_chuck@yahoo.co.uk<br>Sue Turner, University of East Anglia, s.turner@uea.ac.uk<br>British Oceanic Data Centre: <a href="http://www.bodc.ac.uk">http://www.bodc.ac.uk</a> (Download: March 2010)<br>Chuck et al. 2005, Journal of Geophysical Research, Vol. 110, C10022<br>ships non-tox supply and CTD<br>Purge and trap and GC-ECD<br>post cruise calibration with a working standard diluted from Supleco standard in methanol matrix, BOC standard air used as working standard during cruise.  |
| 37 | Platform type and name<br>Expedition name<br>Cruise start date (UTC)<br>EXPOCODE<br>Dataset creator<br>PI contact details<br>Data set origin<br>Relevant publications<br>Sampling technique<br>Analysis and detection technique<br>Calibration technique | Ship, R/V Polarstern<br>ANT XVIII/2<br>10/26/2000<br>06AQ20001026<br>Adele Chuck, University of East Anglia, adele_chuck@yahoo.co.uk<br>Sue Turner, University of East Anglia, s.turner@uea.ac.uk<br>British Oceanic Data Centre: <a href="http://www.bodc.ac.uk">http://www.bodc.ac.uk</a> (Download: March 2010)<br>Chuck et al. 2005, Journal of Geophysical Research, Vol. 110, C10022<br>ships non-tox supply and CTD<br>Purge and trap and GC-ECD<br>post cruise calibration with a working standard diluted from Supleco standard in methanol matrix, BOC standard air used as working standard during cruise. |

|           |                                  |                                                                                                                                                                         |
|-----------|----------------------------------|-------------------------------------------------------------------------------------------------------------------------------------------------------------------------|
| <b>38</b> | Platform type and name           | Ship, CCGS Hudson (# HUD-2003-010)                                                                                                                                      |
|           | Expedition name                  | C-SOLAS SABINA – Spring                                                                                                                                                 |
|           | Cruise start date (UTC)          | 4/23/2003 22:03                                                                                                                                                         |
|           | Dataset creator                  | Lu Wang                                                                                                                                                                 |
|           | PI contact details               | Robert Moore, Dalhousie University, robert.moore@dal.ca                                                                                                                 |
| <b>39</b> | Data set origin                  | Host data centre: <a href="http://www.bodc.ac.uk">http://www.bodc.ac.uk</a> (Download: March 2010)                                                                      |
|           | Relevant publications            | Wang, L., Moore, R. M., and Cullen, J. J. (2009): Methyl iodide in the NW Atlantic: Spatial and seasonal variation, J. Geophys. Res.-Oceans, 114, 10.1029/2007jc004626. |
|           | Sampling technique               | partly shipboard intake system, few bucket collections                                                                                                                  |
|           | Analysis and detection technique | purge-and-trap gas chromatography-mass spectrometry (GC-MS)                                                                                                             |
|           |                                  |                                                                                                                                                                         |
| <b>39</b> | Platform type and name           | Ship, CCGS Martha L. Black (# OAO-038)                                                                                                                                  |
|           | Expedition name                  | C-SOLAS SABINA – Summer                                                                                                                                                 |
|           | Cruise start date (UTC)          | 7/5/2003 9:27                                                                                                                                                           |
|           | Dataset creator                  | Lu Wang                                                                                                                                                                 |
|           | PI contact details               | Robert Moore, Dalhousie University, robert.moore@dal.ca                                                                                                                 |
| <b>39</b> | Data set origin                  | Host data centre: <a href="http://www.bodc.ac.uk">http://www.bodc.ac.uk</a> (Download: March 2010)                                                                      |
|           | Relevant publications            | Wang, L., Moore, R. M., and Cullen, J. J. (2009): Methyl iodide in the nw atlantic: Spatial and seasonal variation, J. Geophys. Res.-Oceans, 114, 10.1029/2007jc004626. |
|           | Analysis and detection technique | purge-and-trap gas chromatography-mass spectrometry (GC-MS)                                                                                                             |
|           |                                  |                                                                                                                                                                         |
|           |                                  |                                                                                                                                                                         |



|    |                                                                                                                                                                                                                         |                                                                                                                                                                                                                                                                                                                                                                                                                                                                                                                                                                        |
|----|-------------------------------------------------------------------------------------------------------------------------------------------------------------------------------------------------------------------------|------------------------------------------------------------------------------------------------------------------------------------------------------------------------------------------------------------------------------------------------------------------------------------------------------------------------------------------------------------------------------------------------------------------------------------------------------------------------------------------------------------------------------------------------------------------------|
| 40 | Platform type and name<br>Expedition name<br>Cruise start date (UTC)<br>Dataset creator<br>PI contact details<br>Data set origin<br>Relevant publications<br><br>Sampling technique<br>Analysis and detection technique | Ship, CCGS Martha L. Black (# IML-2003-72)<br>C-SOLAS SABINA – Fall<br>10/10/2003 9:00<br>Lu Wang<br>Robert Moore, Dalhousie University, robert.moore@dal.ca<br>Host data centre: <a href="http://www.bodc.ac.uk">http://www.bodc.ac.uk</a> (Download: March 2010)<br>Wang, L., Moore, R. M., and Cullen, J. J. (2009): Methyl iodide in the NW Atlantic: Spatial and seasonal variation, J. Geophys. Res.-Oceans, 114, 10.1029/2007jc004626.<br>partly shipboard intake system, few bucket collections<br>purge-and-trap gas chromatography-mass spectrometry (GC-MS) |
| 41 | Platform type and name<br>Expedition name<br>Cruise start date (UTC)<br>Dataset creator<br>PI contact details<br>Data set origin<br>Relevant publications<br><br>Analysis and detection technique                       | Ship, CCGS Tully<br>C-SOLAS SERIES<br>7/7/2002 15:44<br>Lu Wang<br>Robert Moore, Dalhousie University, robert.moore@dal.ca<br>Host data centre: <a href="http://www.bodc.ac.uk">http://www.bodc.ac.uk</a> (Download: March 2010)<br>Moore, R. M., Wang, L. (2006): The influence of iron fertilization on the fluxes of methyl halides and isoprene from ocean to atmosphere in the SERIES experiment. Deep Sea Research Part II, 53(20-22), 2398-2409, doi:10.1016/j.dsr2.2006.05.025.<br>purge-and-trap gas chromatography-mass spectrometry (GC-MS)                 |

|    |                                  |                                                                                                                                                                                                                                                                                         |
|----|----------------------------------|-----------------------------------------------------------------------------------------------------------------------------------------------------------------------------------------------------------------------------------------------------------------------------------------|
| 42 | Platform type and name           | Ship, Shinyo- Maru                                                                                                                                                                                                                                                                      |
|    | Expedition name                  | Shinyo- Maru cruise of the Tokyo University of fisheries- Bay of Bengal                                                                                                                                                                                                                 |
|    | Cruise start date (UTC)          | 1/24/1995                                                                                                                                                                                                                                                                               |
|    | EXPOCODE                         | 49IN19950124                                                                                                                                                                                                                                                                            |
|    | PI contact details               | Yamamoto, Hideki                                                                                                                                                                                                                                                                        |
|    | Relevant publications            | Yamamoto, H. et al (2001), Depth profiles of volatile halogenated hydrocarbons in seawater in the Bay of Bengal, Chemosphere 45 (2001) 371-377                                                                                                                                          |
|    | Sampling technique               | 1,7l Niskin bottles attached to a conductivity/ temperature/ depth hydrocast system, sampling aliquots were taken in 40ml dark glass vials with 0,5 ml of 3,5% mercuric chloride (HgCl <sub>2</sub> ), sealed with teflon lined septa with no headspace, preserve at 4°C until analysis |
|    | Analysis and detection technique | automated purge and trap system (Tekmar 3000J + Aquatek 50), combined with a capillary GC (HP5890 series II)/MS(Automass 50)                                                                                                                                                            |
|    | Standard referred to             | prepared by serial dilution of pure compounds                                                                                                                                                                                                                                           |

|    |                                                                                                                                                                                                                                                                            |                                                                                                                                                                                                                                                                                                                                                                                                                                                                                                                                                                                                                                                                                                                                                                                                                                                                                                                                                      |
|----|----------------------------------------------------------------------------------------------------------------------------------------------------------------------------------------------------------------------------------------------------------------------------|------------------------------------------------------------------------------------------------------------------------------------------------------------------------------------------------------------------------------------------------------------------------------------------------------------------------------------------------------------------------------------------------------------------------------------------------------------------------------------------------------------------------------------------------------------------------------------------------------------------------------------------------------------------------------------------------------------------------------------------------------------------------------------------------------------------------------------------------------------------------------------------------------------------------------------------------------|
| 43 | Platform type and name<br>Expedition name<br>Cruise start date (UTC)<br>EXPOCODE<br>Dataset creator<br>PI contact details<br>Data set origin<br><br>Relevant publications<br><br><br><br>Analysis and detection technique<br>Calibration technique<br>Standard referred to | Ship, Ronald H. Brown<br>GOMECC<br>7/1/2007<br>33RO20070701<br>Shari Yvon-Lewis, Texas A&M University: syvon-lewis@ocean.tamu.edu<br>Shari Yvon-Lewis, Texas A&M University: syvon-lewis@ocean.tamu.edu<br>Mail submission: Shari Yvon-Lewis, syvon-lewis@ocean.tamu.edu, Sept. 2009<br><br>1)Hu, L., S. A. Yvon-Lewis, Y. Liu, J. E. Salisbury, and J. E. O'Hern (2010), Coastal emissions of methyl bromide and methyl chloride along the eastern Gulf of Mexico and the east coast of the United States, Global Biogeochem. Cycles, 24, GB1007, doi:10.1029/2009GB003514.<br>2) Liu, Y., S. A. Yvon- Lewis, L. Hu, J. E. Salisbury, and J. E. O'Hern (2011), CHBr <sub>3</sub> , CH <sub>2</sub> Br <sub>2</sub> , and CHClBr <sub>2</sub> in U.S. coastal waters during the Gulf of Mexico and East Coast Carbon cruise, J. Geophys. Res., 116, C10004, doi:10.1029/2010JC006729<br>Weiss-type equilibrator<br>two point calibration<br>NOAA/GMD |
|----|----------------------------------------------------------------------------------------------------------------------------------------------------------------------------------------------------------------------------------------------------------------------------|------------------------------------------------------------------------------------------------------------------------------------------------------------------------------------------------------------------------------------------------------------------------------------------------------------------------------------------------------------------------------------------------------------------------------------------------------------------------------------------------------------------------------------------------------------------------------------------------------------------------------------------------------------------------------------------------------------------------------------------------------------------------------------------------------------------------------------------------------------------------------------------------------------------------------------------------------|
