# Supplementary material for: Global sea-to-air flux climatology for bromoform, dibromomethane and methyl iodide
Source: Copernicus journal article supplement (doi:10.5194/acp-13-8915-2013), 2013-09-06
Supplement: Supplementary file 2 [file acp-13-8915-2013-supplement.zip]

## Supplement: Atmospheric Mixing Ratio Data

In the following are listed all used atmospheric mixing ratio data (Table S4) of bromoform, dibromomethane and methyl iodide from the HalOcAt database project (<https://halocat.geomar.de/>). The data is uniquely marked with an identifier. Based on the identifier the corresponding metadata information is presented above in Table S5.

**Table S4.** Atmospheric mixing ratios of  $\text{CHBr}_3$ ,  $\text{CH}_2\text{Br}_2$  and  $\text{CH}_3\text{I}$  data in ppt from the HalOcAt database project including sample depth in meter, latitude in °N, longitude in °E and an identifier. Based on the identifier metadata information to the corresponding dataset is available (Table S5).

| Identifier | Latitude<br>[°N] | Longitude<br>[°E] | $\text{CHBr}_3$<br>[ppt] | $\text{CH}_2\text{Br}_2$<br>[ppt] | $\text{CH}_3\text{I}$<br>[ppt] | Sample<br>Depth [m] |
|------------|------------------|-------------------|--------------------------|-----------------------------------|--------------------------------|---------------------|
| 1          | 11.42            | -62.66            | 1.01                     | 0.87                              | 1.07                           | -999                |
| 1          | 11.22            | -61.86            | 1.01                     | 0.84                              | 1.12                           | -999                |
| 1          | 11.00            | -61.00            | 0.75                     | 0.77                              | 1.28                           | -999                |
| 1          | 11.00            | -59.12            | 0.59                     | 0.77                              | 1.10                           | -999                |
| 1          | 11.00            | -58.40            | 0.55                     | 0.73                              | 1.08                           | -999                |
| 1          | 11.00            | -57.58            | 0.58                     | 0.74                              | 1.27                           | -999                |
| 1          | 11.00            | -56.64            | 0.54                     | 0.72                              | 1.11                           | -999                |
| 1          | 11.00            | -56.15            | 0.56                     | 0.74                              | 1.08                           | -999                |
| 1          | 10.94            | -55.28            | 0.61                     | 0.74                              | 1.32                           | -999                |
| 1          | 10.73            | -54.45            | 0.57                     | 0.74                              | 1.44                           | -999                |
| 1          | 10.55            | -53.73            | 0.58                     | 0.78                              | 1.45                           | -999                |
| 1          | 10.41            | -53.13            | 0.60                     | 0.75                              | 1.18                           | -999                |
| 1          | 10.29            | -52.66            | 0.63                     | 0.78                              | 1.21                           | -999                |
| 1          | 10.11            | -51.93            | 0.69                     | 0.79                              | 1.27                           | -999                |
| 1          | 10.00            | -51.41            | 0.67                     | 0.78                              | 1.20                           | -999                |
| 1          | 10.00            | -51.41            | 0.72                     | 0.80                              | 1.33                           | -999                |
| 1          | 10.00            | -50.71            | 0.68                     | 0.78                              | 0.98                           | -999                |
| 1          | 10.00            | -50.35            | 0.71                     | 0.81                              | 0.82                           | -999                |
| 1          | 10.00            | -48.85            | 0.59                     | 0.77                              | 0.80                           | -999                |
| 1          | 10.00            | -48.06            | 0.60                     | 0.76                              | 1.73                           | -999                |
| 1          | 10.00            | -47.36            | 0.55                     | 0.76                              | 0.93                           | -999                |
| 1          | 10.00            | -45.70            | 0.78                     | 0.83                              | 1.00                           | -999                |
| 1          | 10.00            | -44.93            | 0.71                     | 0.78                              | 1.43                           | -999                |
| 1          | 10.00            | -44.24            | 0.84                     | 0.83                              | 1.65                           | -999                |
| 1          | 10.00            | -44.75            | 0.89                     | 0.81                              | 1.53                           | -999                |
| 1          | 10.00            | -42.60            | 0.84                     | 0.84                              | 1.15                           | -999                |
| 1          | 10.00            | -41.28            | 0.79                     | 0.84                              | 1.04                           | -999                |
| 1          | 10.00            | -41.73            | 0.88                     | 0.82                              | 1.04                           | -999                |
| 1          | 10.00            | -40.58            | 0.77                     | 0.82                              | 1.11                           | -999                |
| 1          | 10.00            | -40.89            | 0.66                     | 0.81                              | 1.03                           | -999                |
| 1          | 10.00            | -39.64            | 0.95                     | 0.85                              | 1.40                           | -999                |
| 1          | 10.00            | -40.13            | 1.17                     | 0.90                              | 1.46                           | -999                |
| 1          | 10.00            | -38.99            | 1.13                     | 0.92                              | 1.39                           | -999                |
| 1          | 10.00            | -39.11            | 1.02                     | 0.89                              | 1.40                           | -999                |

|   |       |        |      |      |      |      |
|---|-------|--------|------|------|------|------|
| 1 | 10.00 | -38.57 | 2.11 | 0.91 | 1.74 | -999 |
| 1 | 10.01 | -38.89 | 1.85 | 0.90 | 1.77 | -999 |
| 1 | 10.00 | -37.91 | 1.21 | 0.84 | 1.38 | -999 |
| 1 | 10.00 | -37.32 | 1.18 | 0.86 | 1.36 | -999 |
| 1 | 10.00 | -37.87 | 1.17 | 0.87 | 1.42 | -999 |
| 1 | 10.03 | -36.22 | 3.92 | 0.86 | 1.12 | -999 |
| 1 | 10.00 | -36.23 | 3.08 | 0.83 | 1.01 | -999 |
| 1 | 10.00 | -35.64 | 5.57 | 1.04 | 1.53 | -999 |
| 1 | 10.00 | -34.10 | 1.46 | 0.85 | 1.38 | -999 |
| 1 | 10.00 | -33.40 | 2.73 | 1.04 | 1.91 | -999 |
| 1 | 10.00 | -32.69 | 6.08 | 1.09 | 1.47 | -999 |
| 1 | 10.01 | -32.07 | 2.83 | 1.04 | 1.58 | -999 |
| 1 | 10.00 | -32.15 | 2.21 | 0.92 | 1.44 | -999 |
| 1 | 10.00 | -31.15 | 2.68 | 1.05 | 1.74 | -999 |
| 1 | 10.00 | -30.28 | 3.87 | 1.10 | 1.61 | -999 |
| 1 | 10.00 | -30.28 | 3.98 | 1.17 | 1.81 | -999 |
| 1 | 10.00 | -29.70 | 6.15 | 1.25 | 1.62 | -999 |
| 1 | 10.00 | -28.44 | 1.66 | 0.85 | 0.84 | -999 |
| 1 | 10.00 | -26.76 | 3.81 | 0.94 | 1.05 | -999 |
| 1 | 9.18  | -26.61 | 2.69 | 0.83 | 1.14 | -999 |
| 1 | 8.36  | -26.55 | 2.29 | 0.86 | 1.13 | -999 |
| 1 | 6.87  | -26.45 | 3.08 | 0.79 | 0.97 | -999 |
| 1 | 6.08  | -26.40 | 2.46 | 0.79 | 0.83 | -999 |
| 1 | 5.44  | -26.36 | 1.84 | 0.82 | 0.65 | -999 |
| 1 | 4.92  | -26.32 | 1.42 | 0.83 | 0.63 | -999 |
| 1 | 4.92  | -26.32 | 0.00 | 0.00 | 0.00 | -999 |
| 1 | 4.51  | -26.30 | 1.61 | 0.89 | 0.78 | -999 |
| 1 | 3.51  | -26.23 | 1.86 | 0.89 | 1.09 | -999 |
| 1 | 2.64  | -26.17 | 4.17 | 1.04 | 1.06 | -999 |
| 1 | 1.64  | -26.11 | 1.82 | 0.98 | 0.58 | -999 |
| 1 | 0.73  | -26.05 | 2.38 | 1.03 | 1.11 | -999 |
| 1 | 0.00  | -26.00 | 2.91 | 0.99 | 1.12 | -999 |
| 1 | 0.00  | -26.00 | 2.90 | 1.01 | 1.17 | -999 |
| 1 | 0.00  | -26.00 | 3.85 | 1.02 | 1.21 | -999 |
| 1 | 0.00  | -25.78 | 4.28 | 1.04 | 1.18 | -999 |
| 1 | 0.00  | -25.46 | 4.39 | 0.98 | 1.09 | -999 |
| 1 | 0.00  | -25.46 | 4.28 | 0.99 | 1.05 | -999 |
| 1 | 0.00  | -25.18 | 3.20 | 0.97 | 0.93 | -999 |
| 1 | 0.00  | -24.94 | 3.65 | 1.00 | 1.11 | -999 |
| 1 | 0.00  | -24.71 | 2.69 | 0.95 | 0.94 | -999 |
| 1 | 0.00  | -24.46 | 2.61 | 1.00 | 1.08 | -999 |
| 1 | 0.00  | -24.46 | 2.53 | 0.97 | 1.05 | -999 |
| 1 | 0.00  | -24.21 | 2.55 | 1.00 | 1.85 | -999 |
| 1 | 0.00  | -23.99 | 2.69 | 0.98 | 1.20 | -999 |
| 1 | 0.00  | -23.77 | 2.46 | 1.00 | 1.28 | -999 |
| 1 | 0.00  | -23.56 | 2.46 | 1.02 | 1.30 | -999 |
| 1 | 0.00  | -23.50 | 2.69 | 1.03 | 1.55 | -999 |

|   |       |        |       |      |      |      |
|---|-------|--------|-------|------|------|------|
| 1 | 0.03  | -23.49 | 3.24  | 1.02 | 1.06 | -999 |
| 1 | 0.14  | -23.50 | 2.51  | 1.06 | 1.39 | -999 |
| 1 | 1.12  | -23.50 | 2.24  | 1.02 | 1.44 | -999 |
| 1 | 1.95  | -23.50 | 2.67  | 1.05 | 1.42 | -999 |
| 1 | 2.65  | -23.54 | 2.46  | 1.04 | 1.24 | -999 |
| 1 | 3.52  | -23.70 | 1.90  | 0.95 | 1.10 | -999 |
| 1 | 4.46  | -23.87 | 1.43  | 0.93 | 1.10 | -999 |
| 1 | 5.29  | -24.03 | 2.00  | 0.95 | 1.17 | -999 |
| 1 | 5.97  | -24.15 | 2.34  | 0.85 | 1.00 | -999 |
| 1 | 6.50  | -24.24 | 1.55  | 0.85 | 1.30 | -999 |
| 1 | 7.36  | -24.41 | 1.46  | 0.88 | 1.20 | -999 |
| 1 | 8.37  | -24.60 | 1.49  | 0.90 | 0.91 | -999 |
| 1 | 9.00  | -24.72 | 2.17  | 0.95 | 1.18 | -999 |
| 1 | 9.68  | -24.85 | 2.83  | 1.30 | 1.74 | -999 |
| 1 | 10.19 | -24.94 | 3.73  | 1.58 | 2.20 | -999 |
| 1 | 10.53 | -24.91 | 3.55  | 1.60 | 2.38 | -999 |
| 1 | 10.81 | -24.09 | 4.50  | 1.75 | 2.33 | -999 |
| 1 | 11.00 | -23.40 | 2.95  | 1.49 | 2.02 | -999 |
| 1 | 11.00 | -23.13 | 2.96  | 1.55 | 2.09 | -999 |
| 1 | 11.00 | -22.83 | 3.08  | 1.59 | 1.91 | -999 |
| 1 | 11.00 | -22.44 | 3.35  | 1.72 | 1.84 | -999 |
| 1 | 11.00 | -22.10 | 3.34  | 1.68 | 2.11 | -999 |
| 1 | 11.00 | -21.77 | 2.99  | 1.49 | 1.88 | -999 |
| 1 | 11.00 | -21.67 | 3.51  | 1.64 | 2.19 | -999 |
| 1 | 11.00 | -21.27 | 8.34  | 1.98 | 2.59 | -999 |
| 1 | 11.00 | -20.73 | 4.51  | 1.71 | 2.12 | -999 |
| 1 | 11.03 | -20.23 | 3.47  | 1.40 | 1.63 | -999 |
| 1 | 11.18 | -19.77 | 3.06  | 1.56 | 2.19 | -999 |
| 1 | 11.32 | -19.31 | 2.84  | 1.45 | 1.81 | -999 |
| 1 | 11.43 | -18.97 | 3.84  | 1.45 | 1.96 | -999 |
| 1 | 11.50 | -18.73 | 3.51  | 1.43 | 1.84 | -999 |
| 1 | 11.80 | -17.95 | 4.05  | 1.48 | 1.96 | -999 |
| 1 | 11.70 | -17.50 | 2.94  | 1.37 | 1.84 | -999 |
| 1 | 11.08 | -17.21 | 2.72  | 1.17 | 1.87 | -999 |
| 1 | 10.59 | -17.07 | 6.99  | 1.23 | 2.29 | -999 |
| 1 | 10.97 | -17.60 | 5.74  | 1.27 | 1.96 | -999 |
| 1 | 11.03 | -17.70 | 2.79  | 1.22 | 1.94 | -999 |
| 1 | 11.01 | -18.37 | 6.60  | 1.61 | 1.79 | -999 |
| 1 | 11.00 | -18.79 | 3.44  | 1.40 | 1.79 | -999 |
| 1 | 11.00 | -19.30 | 11.78 | 1.91 | 2.02 | -999 |
| 1 | 11.00 | -19.75 | 3.64  | 1.43 | 1.82 | -999 |
| 1 | 11.04 | -20.00 | 5.71  | 1.40 | 2.00 | -999 |
| 1 | 11.00 | -20.42 | 3.98  | 1.35 | 1.74 | -999 |
| 1 | 11.00 | -20.01 | 4.53  | 1.48 | 2.18 | -999 |
| 1 | 10.89 | -19.92 | 4.15  | 1.63 | 1.94 | -999 |
| 1 | 10.08 | -19.46 | 27.19 | 4.65 | 3.04 | -999 |
| 1 | 9.31  | -19.00 | 10.54 | 2.60 | 2.76 | -999 |

|   |       |        |      |      |      |      |
|---|-------|--------|------|------|------|------|
| 1 | 8.92  | -18.79 | 6.79 | 1.42 | 2.44 | -999 |
| 1 | 8.39  | -18.49 | 1.97 | 0.92 | 1.88 | -999 |
| 1 | 7.66  | -17.76 | 1.78 | 0.83 | 1.31 | -999 |
| 1 | 7.00  | -17.08 | 1.40 | 0.87 | 1.49 | -999 |
| 1 | 6.42  | -16.39 | 4.33 | 0.98 | 1.24 | -999 |
| 1 | 6.08  | -15.84 | 1.19 | 0.89 | 1.70 | -999 |
| 1 | 5.77  | -14.99 | 1.03 | 0.88 | 1.19 | -999 |
| 1 | 5.40  | -13.95 | 1.01 | 0.86 | 1.16 | -999 |
| 1 | 4.75  | -12.15 | 1.27 | 0.84 | 0.95 | -999 |
| 1 | 4.44  | -11.29 | 1.13 | 0.92 | 1.31 | -999 |
| 1 | 4.09  | -10.32 | 0.94 | 0.90 | 1.09 | -999 |
| 1 | 3.70  | -9.23  | 5.54 | 0.91 | 0.84 | -999 |
| 1 | 3.73  | -9.31  | 5.81 | 0.89 | 0.80 | -999 |
| 1 | 3.53  | -8.37  | 1.71 | 0.97 | 1.46 | -999 |
| 1 | 3.49  | -7.31  | 1.39 | 0.97 | 1.39 | -999 |
| 1 | 3.51  | -6.07  | 1.18 | 0.93 | 1.39 | -999 |
| 1 | 3.53  | -5.02  | 4.03 | 0.96 | 1.49 | -999 |
| 1 | 3.55  | -4.05  | 1.72 | 0.93 | 1.55 | -999 |
| 1 | 3.57  | -2.96  | 1.33 | 0.95 | 1.82 | -999 |
| 1 | 3.59  | -1.78  | 1.29 | 0.92 | 1.53 | -999 |
| 1 | -999  | -999   | 5.13 | 0.95 | 1.16 | -999 |
| 2 | 48.72 | -8.88  | 0.54 | 0.70 | 0.64 | -999 |
| 2 | 48.61 | -9.30  | 0.61 | 1.25 | 0.96 | -999 |
| 2 | 48.54 | -9.73  | 0.61 | 0.97 | 1.30 | -999 |
| 2 | 48.31 | -10.07 | 0.60 | 0.98 | 1.09 | -999 |
| 2 | 48.06 | -10.41 | 0.59 | 0.85 | 0.60 | -999 |
| 2 | 47.83 | -10.77 | 0.60 | 1.05 | 1.47 | -999 |
| 2 | 47.59 | -11.14 | 0.58 | 0.93 | 2.41 | -999 |
| 2 | 47.36 | -11.50 | 0.61 | 0.90 | 2.56 | -999 |
| 2 | 47.15 | -11.87 | 0.60 | 0.92 | 2.11 | -999 |
| 2 | 46.90 | -12.21 | 0.62 | 0.94 | 1.32 | -999 |
| 2 | 46.66 | -12.57 | 0.60 | 0.85 | 1.26 | -999 |
| 2 | 46.49 | -12.83 | 0.62 | 0.66 | 1.40 | -999 |
| 2 | 46.26 | -13.18 | 0.56 | 1.22 | 1.03 | -999 |
| 2 | 46.04 | -13.52 | 0.55 | 0.77 | 2.10 | -999 |
| 2 | 45.81 | -13.84 | 0.55 | 0.79 | 1.26 | -999 |
| 2 | 45.45 | -14.35 | 0.52 | 0.70 | 1.80 | -999 |
| 2 | 45.26 | -14.63 | 0.54 | 0.90 | 0.75 | -999 |
| 2 | 45.16 | -14.78 | 0.56 | 0.95 | 0.27 | -999 |
| 2 | 45.04 | -14.93 | 0.65 | 1.16 | 0.30 | -999 |
| 2 | 44.94 | -15.09 | 0.59 | 1.29 | 0.59 | -999 |
| 2 | 44.83 | -15.28 | 0.64 | 0.96 | 1.07 | -999 |
| 2 | 44.76 | -15.47 | 0.63 | 1.23 | 0.31 | -999 |
| 2 | 44.80 | -15.63 | 0.59 | 0.59 | 1.23 | -999 |
| 2 | 44.80 | -15.82 | 0.59 | 1.15 | 0.91 | -999 |
| 2 | 44.79 | -16.01 | 0.60 | 1.19 | 2.13 | -999 |
| 2 | 44.78 | -16.21 | 0.55 | 1.01 | 1.21 | -999 |

|   |       |        |      |      |      |      |
|---|-------|--------|------|------|------|------|
| 2 | 44.67 | -16.49 | 0.60 | 1.05 | 1.13 | -999 |
| 2 | 44.50 | -16.80 | 0.61 | 0.87 | 0.92 | -999 |
| 2 | 44.35 | -17.11 | 0.58 | 1.05 | 0.92 | -999 |
| 2 | 44.18 | -17.45 | 0.60 | 0.99 | 0.78 | -999 |
| 2 | 44.00 | -17.71 | 0.59 | 0.93 | 0.70 | -999 |
| 2 | 43.73 | -18.03 | 0.59 | 0.91 | 0.88 | -999 |
| 2 | 43.42 | -18.29 | -999 | -999 | -999 | -999 |
| 2 | 43.13 | -18.55 | 0.60 | 0.90 | 0.78 | -999 |
| 2 | 42.86 | -18.83 | 0.61 | 0.89 | 0.78 | -999 |
| 2 | 42.58 | -19.10 | 0.60 | 0.93 | 0.95 | -999 |
| 2 | 42.30 | -19.35 | 0.61 | 1.06 | 0.84 | -999 |
| 2 | 42.08 | -19.57 | 0.59 | 0.95 | 0.76 | -999 |
| 2 | 41.79 | -19.81 | 0.58 | 0.99 | 0.69 | -999 |
| 2 | 41.51 | -20.06 | 0.58 | 1.07 | 0.73 | -999 |
| 2 | 41.25 | -20.25 | 0.58 | 0.94 | 0.68 | -999 |
| 2 | 41.31 | -20.23 | 0.59 | 0.96 | 0.72 | -999 |
| 2 | 41.18 | -20.23 | 0.57 | 1.03 | 0.68 | -999 |
| 2 | 41.18 | -20.22 | 0.55 | 0.94 | 0.61 | -999 |
| 2 | 41.03 | -20.45 | 0.57 | 1.03 | 0.52 | -999 |
| 2 | 40.80 | -20.78 | 0.63 | 0.93 | 0.74 | -999 |
| 2 | 40.56 | -21.12 | 0.67 | 1.28 | 0.57 | -999 |
| 2 | 40.17 | -21.69 | 0.53 | 1.05 | 0.78 | -999 |
| 2 | 39.93 | -22.04 | 0.62 | 1.06 | 0.65 | -999 |
| 2 | 39.68 | -22.39 | 0.61 | 1.04 | 0.62 | -999 |
| 2 | 39.43 | -22.73 | 0.56 | 1.01 | 0.79 | -999 |
| 2 | 39.19 | -23.07 | 0.56 | 0.89 | 0.79 | -999 |
| 2 | 38.95 | -23.41 | 0.53 | 0.81 | 0.64 | -999 |
| 2 | 38.71 | -23.76 | 0.52 | 0.91 | 0.53 | -999 |
| 2 | 38.47 | -24.10 | 0.52 | 0.83 | 0.40 | -999 |
| 2 | 38.23 | -24.43 | 0.52 | 0.85 | 0.36 | -999 |
| 2 | 37.99 | -24.77 | 0.52 | 0.89 | 0.31 | -999 |
| 2 | 37.74 | -25.11 | 0.53 | 0.94 | 0.40 | -999 |
| 2 | 37.69 | -25.53 | 0.56 | 0.95 | 0.54 | -999 |
| 2 | 37.73 | -25.65 | 0.59 | 0.96 | 0.42 | -999 |
| 2 | 37.50 | -25.70 | 0.59 | 0.72 | 0.41 | -999 |
| 2 | 36.14 | -25.97 | 0.60 | 1.00 | 0.62 | -999 |
| 2 | 35.79 | -26.03 | 0.63 | 1.04 | 0.72 | -999 |
| 2 | 35.43 | -26.10 | 0.59 | 0.89 | 0.57 | -999 |
| 2 | 35.07 | -26.18 | 0.50 | 0.98 | 0.57 | -999 |
| 2 | 34.72 | -26.25 | 0.54 | 0.92 | 0.61 | -999 |
| 2 | 34.37 | -26.33 | 0.52 | 0.91 | 0.68 | -999 |
| 2 | 34.04 | -26.39 | 0.54 | 0.88 | 0.68 | -999 |
| 2 | 33.69 | -26.46 | 0.54 | 1.02 | 0.62 | -999 |
| 2 | 33.33 | -26.51 | 0.54 | 0.91 | 0.79 | -999 |
| 2 | 32.97 | -26.58 | 0.57 | 1.07 | 0.68 | -999 |
| 2 | 32.60 | -26.66 | 0.55 | 0.86 | 0.70 | -999 |
| 2 | 32.32 | -26.73 | 0.60 | 1.02 | 0.61 | -999 |

|   |       |        |      |      |      |      |
|---|-------|--------|------|------|------|------|
| 2 | 31.97 | -26.80 | -999 | 0.90 | 0.80 | -999 |
| 2 | 31.62 | -26.84 | 0.59 | 0.81 | 0.72 | -999 |
| 2 | 31.27 | -26.91 | 0.59 | 0.74 | 0.73 | -999 |
| 2 | 30.91 | -26.98 | 0.59 | 0.71 | 0.66 | -999 |
| 2 | 30.35 | -27.09 | 0.57 | 0.81 | 0.71 | -999 |
| 2 | 29.99 | -27.15 | 0.59 | 0.89 | 0.84 | -999 |
| 2 | 29.62 | -27.22 | 0.57 | 1.01 | 0.67 | -999 |
| 2 | 29.26 | -27.29 | 0.69 | 0.81 | 0.67 | -999 |
| 2 | 28.90 | -27.36 | 0.62 | 0.58 | 0.68 | -999 |
| 2 | 28.54 | -27.42 | 0.59 | 1.11 | 0.82 | -999 |
| 2 | 28.22 | -27.48 | 0.58 | 1.02 | 0.71 | -999 |
| 2 | 27.86 | -27.54 | 0.61 | 1.01 | 0.75 | -999 |
| 2 | 27.50 | -27.61 | 0.63 | 0.99 | 0.59 | -999 |
| 2 | 27.14 | -27.68 | 0.67 | 0.69 | 0.53 | -999 |
| 2 | 26.79 | -27.74 | 0.60 | 0.57 | 0.50 | -999 |
| 2 | 26.49 | -27.80 | 0.58 | 0.77 | 0.53 | -999 |
| 2 | 26.15 | -27.86 | -999 | -999 | 0.94 | -999 |
| 2 | 25.79 | -27.92 | 0.51 | 0.95 | 0.66 | -999 |
| 2 | 25.43 | -27.98 | 0.53 | 0.84 | 0.61 | -999 |
| 2 | 25.33 | -28.00 | 0.48 | 0.71 | 0.66 | -999 |
| 2 | 25.26 | -28.01 | 0.49 | 0.77 | 0.54 | -999 |
| 2 | 24.73 | -28.00 | 0.53 | 0.75 | 0.54 | -999 |
| 2 | 24.36 | -28.00 | 0.51 | 1.01 | 0.55 | -999 |
| 2 | 23.99 | -28.00 | 0.47 | 0.84 | 0.75 | -999 |
| 2 | 23.63 | -28.00 | 0.56 | 0.97 | 0.67 | -999 |
| 2 | 23.26 | -28.00 | 0.56 | 0.92 | 0.64 | -999 |
| 2 | 22.92 | -28.00 | 0.57 | 0.85 | 0.65 | -999 |
| 2 | 22.58 | -28.00 | 0.55 | 0.80 | 0.68 | -999 |
| 2 | 22.22 | -28.00 | 0.59 | 0.88 | 0.56 | -999 |
| 2 | 21.86 | -28.00 | 0.59 | 0.86 | 0.61 | -999 |
| 2 | 21.49 | -28.00 | 0.56 | 0.97 | 0.67 | -999 |
| 2 | 21.12 | -28.00 | 0.54 | 0.78 | 0.66 | -999 |
| 2 | 20.84 | -28.00 | 0.56 | 0.91 | 0.77 | -999 |
| 2 | 20.78 | -28.02 | 0.55 | 0.97 | 0.68 | -999 |
| 2 | 20.42 | -28.11 | 0.54 | 0.82 | 0.70 | -999 |
| 2 | 20.07 | -28.20 | 0.54 | 0.78 | 0.81 | -999 |
| 2 | 19.36 | -28.39 | 0.58 | 0.92 | 0.98 | -999 |
| 2 | 19.00 | -28.48 | 0.54 | 0.83 | 0.82 | -999 |
| 2 | 18.65 | -28.57 | 0.53 | 0.83 | 0.88 | -999 |
| 2 | 18.30 | -28.67 | 0.55 | 0.79 | 0.98 | -999 |
| 2 | 17.94 | -28.76 | 0.57 | 0.79 | 1.02 | -999 |
| 2 | 17.59 | -28.85 | 0.55 | 0.86 | 0.86 | -999 |
| 2 | 17.28 | -28.92 | 0.54 | 0.78 | 0.76 | -999 |
| 2 | 16.93 | -28.98 | 0.55 | 0.84 | 0.88 | -999 |
| 2 | 16.58 | -28.91 | 0.52 | 0.84 | 0.75 | -999 |
| 2 | 16.23 | -28.84 | 0.59 | 0.77 | 0.95 | -999 |
| 2 | 15.52 | -28.69 | 0.40 | 0.86 | 0.63 | -999 |

|   |       |        |      |      |      |      |
|---|-------|--------|------|------|------|------|
| 2 | 15.18 | -28.62 | 0.58 | 0.78 | 1.01 | -999 |
| 2 | 14.83 | -28.55 | 0.64 | 0.83 | 0.84 | -999 |
| 2 | 14.49 | -28.48 | 0.66 | 0.83 | 0.95 | -999 |
| 2 | 14.14 | -28.41 | 0.63 | 0.84 | 0.85 | -999 |
| 2 | 13.72 | -28.32 | 0.58 | 0.91 | 0.86 | -999 |
| 2 | 13.37 | -28.25 | 0.62 | 0.82 | 0.87 | -999 |
| 2 | 13.03 | -28.18 | 0.61 | 0.84 | 0.99 | -999 |
| 2 | 12.68 | -28.11 | 0.65 | 0.87 | 0.82 | -999 |
| 2 | 12.33 | -28.03 | 0.65 | 1.04 | 0.74 | -999 |
| 2 | 12.17 | -28.01 | 0.70 | 0.87 | 0.74 | -999 |
| 2 | 12.18 | -28.01 | 0.74 | 0.81 | 0.81 | -999 |
| 2 | 12.11 | -28.01 | 0.74 | 0.84 | 0.77 | -999 |
| 2 | 11.76 | -27.99 | 0.68 | 1.02 | 0.73 | -999 |
| 2 | 11.41 | -28.00 | 0.59 | 0.81 | 0.80 | -999 |
| 2 | 11.06 | -28.00 | 0.58 | 0.81 | 0.59 | -999 |
| 2 | 10.77 | -28.00 | 0.57 | 0.82 | 0.66 | -999 |
| 2 | 10.42 | -28.00 | 0.53 | 0.74 | 0.69 | -999 |
| 2 | 9.97  | -28.00 | 0.54 | 0.74 | 0.69 | -999 |
| 2 | 9.61  | -28.00 | 0.56 | 0.76 | 0.82 | -999 |
| 2 | 8.71  | -28.00 | 0.45 | 0.87 | 0.75 | -999 |
| 2 | 8.37  | -28.00 | 0.47 | 0.75 | 0.85 | -999 |
| 2 | 8.01  | -28.00 | 0.49 | 0.81 | 0.70 | -999 |
| 2 | 7.66  | -28.00 | 0.52 | 0.77 | 0.90 | -999 |
| 2 | 7.31  | -28.00 | 0.57 | 0.79 | 0.72 | -999 |
| 2 | 7.00  | -28.00 | 0.53 | 0.77 | 0.60 | -999 |
| 2 | 7.00  | -27.92 | 0.50 | 0.79 | 0.67 | -999 |
| 2 | 7.22  | -27.72 | 0.53 | 0.83 | 0.65 | -999 |
| 2 | 7.18  | -27.82 | 0.53 | 0.83 | 0.69 | -999 |
| 2 | 7.15  | -27.81 | 0.51 | 0.77 | 0.65 | -999 |
| 2 | 7.06  | -27.87 | 0.53 | 0.79 | 0.72 | -999 |
| 2 | 7.07  | -27.73 | 0.50 | 0.79 | 0.72 | -999 |
| 2 | 6.94  | -27.49 | 0.53 | 0.82 | 0.76 | -999 |
| 2 | 6.79  | -27.30 | 0.52 | 0.78 | 0.74 | -999 |
| 2 | 6.80  | -27.11 | 0.53 | 0.79 | 0.63 | -999 |
| 2 | 6.94  | -26.86 | 0.53 | 0.76 | 0.84 | -999 |
| 2 | 6.80  | -26.68 | 0.53 | 0.76 | 0.65 | -999 |
| 2 | 6.75  | -26.45 | 0.54 | 0.83 | 0.79 | -999 |
| 2 | 6.74  | -26.29 | 0.55 | 0.79 | 0.72 | -999 |
| 2 | 6.74  | -26.15 | 0.52 | 0.82 | 0.92 | -999 |
| 2 | 6.74  | -26.01 | 0.51 | 0.77 | 0.88 | -999 |
| 2 | 6.54  | -25.95 | 0.56 | 0.78 | 0.86 | -999 |
| 2 | 6.24  | -25.89 | 0.50 | 0.71 | 0.49 | -999 |
| 2 | 5.93  | -25.82 | 0.57 | 0.67 | 0.58 | -999 |
| 2 | 5.64  | -25.83 | 0.58 | 0.67 | 0.53 | -999 |
| 2 | 5.38  | -25.82 | 0.55 | 0.65 | 0.63 | -999 |
| 2 | 5.01  | -25.69 | 0.37 | 0.69 | 0.44 | -999 |
| 2 | 4.89  | -25.45 | 0.39 | 0.69 | 0.51 | -999 |

|   |       |        |      |      |      |      |
|---|-------|--------|------|------|------|------|
| 2 | 4.59  | -25.41 | 0.47 | 0.71 | 0.61 | -999 |
| 2 | 4.26  | -25.37 | 0.48 | 0.83 | 0.83 | -999 |
| 2 | 3.95  | -25.30 | 0.50 | 0.86 | 0.83 | -999 |
| 2 | 3.40  | -25.22 | 0.50 | 0.83 | 0.72 | -999 |
| 2 | 3.07  | -25.16 | 0.52 | 0.75 | 0.82 | -999 |
| 2 | 2.71  | -25.11 | 0.51 | 0.76 | 0.93 | -999 |
| 2 | 2.39  | -25.06 | 0.47 | 0.71 | 0.75 | -999 |
| 2 | 2.06  | -25.01 | 0.48 | 0.75 | 0.78 | -999 |
| 2 | 2.00  | -25.00 | 0.48 | 0.74 | 0.76 | -999 |
| 2 | 2.00  | -25.00 | 0.48 | 0.75 | 0.69 | -999 |
| 2 | 1.86  | -25.00 | 0.44 | 0.66 | 0.77 | -999 |
| 2 | 1.59  | -25.00 | 0.44 | 0.75 | 0.65 | -999 |
| 2 | 1.39  | -25.00 | 0.42 | 0.77 | 0.75 | -999 |
| 2 | 1.10  | -25.00 | 0.50 | 0.72 | 0.63 | -999 |
| 2 | 0.91  | -25.00 | 0.48 | 0.75 | 0.80 | -999 |
| 2 | 0.63  | -25.00 | 0.49 | 0.76 | 0.70 | -999 |
| 2 | 0.43  | -25.00 | 0.47 | 0.78 | 0.80 | -999 |
| 2 | 0.15  | -25.00 | 0.48 | 0.76 | 0.85 | -999 |
| 2 | -0.01 | -25.00 | 0.47 | 0.84 | 0.58 | -999 |
| 2 | -0.32 | -25.00 | 0.51 | 0.70 | 0.89 | -999 |
| 2 | -0.54 | -25.00 | 0.50 | 0.76 | 0.80 | -999 |
| 2 | -0.82 | -25.00 | 0.43 | 0.79 | 0.71 | -999 |
| 2 | -1.03 | -25.00 | 0.47 | 0.73 | 0.58 | -999 |
| 2 | -1.32 | -25.00 | 0.45 | 0.76 | 0.61 | -999 |
| 2 | -1.55 | -25.00 | 0.49 | 0.75 | 0.64 | -999 |
| 2 | -1.85 | -25.00 | 0.45 | 0.77 | 0.76 | -999 |
| 2 | -2.00 | -25.00 | 0.45 | 0.76 | 0.70 | -999 |
| 2 | -2.04 | -25.01 | 0.49 | 0.83 | 0.91 | -999 |
| 2 | -2.31 | -25.15 | 0.70 | 0.88 | 0.54 | -999 |
| 2 | -2.60 | -25.28 | 0.40 | 0.72 | 0.82 | -999 |
| 2 | -2.88 | -25.42 | 0.42 | 0.74 | 0.66 | -999 |
| 2 | -3.11 | -25.52 | 0.42 | 0.62 | 0.61 | -999 |
| 2 | -3.38 | -25.67 | 0.42 | 0.68 | 0.71 | -999 |
| 2 | -3.97 | -25.94 | 0.41 | 0.61 | 0.63 | -999 |
| 2 | -4.00 | -25.96 | 0.39 | 0.66 | 0.51 | -999 |
| 2 | -4.16 | -26.04 | 0.43 | 0.65 | 0.64 | -999 |
| 2 | -4.46 | -26.17 | 0.43 | 0.57 | 0.57 | -999 |
| 2 | -4.73 | -26.31 | 0.43 | 0.75 | 0.58 | -999 |
| 2 | -4.99 | -26.43 | 0.42 | 0.52 | 0.56 | -999 |
| 2 | -5.22 | -26.54 | 0.43 | 0.71 | 0.56 | -999 |
| 2 | -5.49 | -26.67 | 0.44 | 0.76 | 0.64 | -999 |
| 2 | -5.76 | -26.80 | 0.42 | 0.69 | 0.62 | -999 |
| 2 | -6.00 | -26.92 | 0.41 | 0.64 | 0.68 | -999 |
| 2 | -6.00 | -26.92 | 0.43 | 0.71 | 0.68 | -999 |
| 2 | -6.24 | -27.04 | 0.51 | 0.66 | 0.61 | -999 |
| 2 | -6.80 | -27.31 | 0.46 | 0.60 | 0.71 | -999 |
| 2 | -7.04 | -27.42 | 0.44 | 0.57 | 0.65 | -999 |



|   |        |        |      |      |      |      |
|---|--------|--------|------|------|------|------|
| 2 | -7.32  | -27.56 | 0.44 | 0.73 | 0.70 | -999 |
| 2 | -7.75  | -27.77 | 0.47 | 0.75 | 0.74 | -999 |
| 2 | -8.00  | -27.89 | 0.48 | 0.66 | 0.83 | -999 |
| 2 | -8.01  | -27.89 | 0.47 | 0.64 | 0.69 | -999 |
| 2 | -8.22  | -27.99 | 0.49 | 0.69 | 0.66 | -999 |
| 2 | -8.50  | -28.13 | 0.50 | 0.66 | 0.80 | -999 |
| 2 | -8.78  | -28.26 | 0.49 | 0.64 | 0.59 | -999 |
| 2 | -9.07  | -28.40 | 0.52 | 0.66 | 0.61 | -999 |
| 2 | -9.32  | -28.53 | 0.49 | 0.60 | 0.55 | -999 |
| 2 | -9.50  | -28.72 | 0.51 | 0.62 | 0.52 | -999 |
| 2 | -9.50  | -28.50 | 0.30 | 0.64 | 0.76 | -999 |
| 2 | -9.51  | -28.51 | 0.32 | 0.59 | 0.48 | -999 |
| 2 | -9.50  | -28.28 | 0.53 | 0.65 | 0.72 | -999 |
| 2 | -9.71  | -28.48 | 0.56 | 0.66 | 0.78 | -999 |
| 2 | -9.94  | -28.61 | 0.48 | 0.59 | 0.62 | -999 |
| 2 | -10.19 | -28.75 | 0.47 | 0.70 | 0.68 | -999 |
| 2 | -10.61 | -29.00 | 0.51 | 0.59 | 0.63 | -999 |
| 2 | -10.89 | -29.16 | 0.31 | 0.70 | 0.63 | -999 |
| 2 | -11.01 | -29.23 | 0.55 | 0.68 | 0.67 | -999 |
| 2 | -11.07 | -29.26 | 0.54 | 0.62 | 0.65 | -999 |
| 2 | -11.35 | -29.43 | 0.52 | 0.53 | 0.69 | -999 |
| 2 | -11.64 | -29.60 | 0.48 | 0.65 | 0.69 | -999 |
| 2 | -11.92 | -29.77 | 0.48 | 0.67 | 0.53 | -999 |
| 2 | -12.16 | -29.91 | 0.45 | 0.64 | 0.59 | -999 |
| 2 | -12.43 | -30.07 | 0.45 | 0.57 | 0.61 | -999 |
| 2 | -12.69 | -30.22 | 0.39 | 0.72 | 0.70 | -999 |
| 2 | -12.94 | -30.37 | 0.44 | 0.62 | 0.60 | -999 |
| 2 | -13.00 | -30.40 | 0.42 | 0.61 | 0.65 | -999 |
| 2 | -13.16 | -30.48 | 0.39 | 0.54 | 0.59 | -999 |
| 2 | -13.40 | -30.64 | 0.41 | 0.60 | 0.59 | -999 |
| 2 | -13.66 | -30.79 | 0.43 | 0.57 | 0.57 | -999 |
| 2 | -13.93 | -30.94 | 0.48 | 0.54 | 0.68 | -999 |
| 2 | -14.13 | -31.11 | 0.42 | 0.69 | 0.59 | -999 |
| 2 | -14.25 | -31.16 | 0.44 | 0.65 | 0.68 | -999 |
| 2 | -14.25 | -31.00 | 0.44 | 0.62 | 0.45 | -999 |
| 2 | -14.25 | -31.00 | 0.44 | 0.58 | 0.57 | -999 |
| 2 | -14.25 | -30.78 | 0.47 | 0.65 | 0.59 | -999 |
| 2 | -14.43 | -30.96 | 0.48 | 0.71 | 0.61 | -999 |
| 2 | -14.65 | -31.06 | 0.49 | 0.65 | 0.55 | -999 |
| 2 | -14.90 | -31.16 | 0.52 | 0.63 | 0.50 | -999 |
| 2 | -15.12 | -31.25 | 0.49 | 0.64 | 0.62 | -999 |
| 2 | -15.39 | -31.35 | 0.49 | 0.61 | 0.50 | -999 |
| 2 | -15.66 | -31.45 | 0.48 | 0.49 | 0.54 | -999 |
| 2 | -15.93 | -31.57 | 0.49 | 0.53 | 0.59 | -999 |
| 2 | -16.00 | -31.59 | 0.46 | 0.61 | 0.63 | -999 |
| 2 | -16.14 | -31.65 | 0.46 | 0.70 | 0.60 | -999 |
| 2 | -16.41 | -31.76 | 0.46 | 0.69 | 0.60 | -999 |

|   |        |        |      |      |      |      |
|---|--------|--------|------|------|------|------|
| 2 | -16.83 | -31.92 | 0.51 | 0.65 | 0.63 | -999 |
| 2 | -17.03 | -32.00 | 0.43 | 0.70 | 0.66 | -999 |
| 2 | -17.29 | -32.11 | 0.46 | 0.68 | 0.82 | -999 |
| 2 | -17.56 | -32.22 | 0.41 | 0.69 | 1.01 | -999 |
| 2 | -17.83 | -32.33 | 0.41 | 0.68 | 0.91 | -999 |
| 2 | -18.00 | -32.40 | 0.42 | 0.66 | 0.84 | -999 |
| 2 | -18.01 | -32.40 | 0.41 | 0.83 | 0.84 | -999 |
| 2 | -18.16 | -32.46 | 0.40 | 0.72 | 0.60 | -999 |
| 2 | -18.37 | -32.60 | 0.67 | 0.67 | 0.68 | -999 |
| 2 | -18.50 | -32.65 | 0.65 | 0.77 | 0.64 | -999 |
| 2 | -18.50 | -32.50 | 0.47 | 0.69 | 0.68 | -999 |
| 2 | -18.50 | -32.47 | 0.44 | 0.67 | 0.56 | -999 |
| 2 | -18.54 | -32.30 | 0.42 | 0.68 | 0.50 | -999 |
| 2 | -18.73 | -32.50 | 0.44 | 0.63 | 0.66 | -999 |
| 2 | -18.96 | -32.57 | 0.42 | 0.69 | 0.61 | -999 |
| 2 | -19.25 | -32.66 | 0.42 | 0.59 | 0.59 | -999 |
| 2 | -19.66 | -32.79 | 0.43 | 0.68 | 0.71 | -999 |
| 2 | -19.95 | -32.88 | 0.43 | 0.71 | 0.77 | -999 |
| 2 | -20.00 | -32.89 | 0.41 | 0.71 | 0.68 | -999 |
| 2 | -20.15 | -32.94 | 0.43 | 0.70 | 0.57 | -999 |
| 2 | -20.43 | -32.99 | 0.44 | 0.74 | 0.71 | -999 |
| 2 | -20.72 | -32.96 | 0.45 | 0.74 | 0.71 | -999 |
| 2 | -20.99 | -32.93 | 0.47 | 0.68 | 0.79 | -999 |
| 2 | -21.00 | -32.93 | 0.46 | 0.68 | 0.60 | -999 |
| 2 | -20.99 | -32.94 | 0.47 | 0.67 | 0.65 | -999 |
| 2 | -21.09 | -32.93 | 0.46 | 0.76 | 0.53 | -999 |
| 2 | -21.38 | -32.88 | 0.45 | 0.73 | 0.57 | -999 |
| 2 | -21.67 | -32.85 | 0.45 | 0.82 | 0.62 | -999 |
| 2 | -21.95 | -32.82 | 0.45 | 0.73 | 0.60 | -999 |
| 2 | -21.99 | -32.81 | 0.40 | 0.79 | 0.90 | -999 |
| 2 | -22.19 | -32.83 | 0.39 | 0.77 | 0.71 | -999 |
| 2 | -22.40 | -32.96 | 0.38 | 0.75 | 0.78 | -999 |
| 2 | -22.50 | -32.90 | 0.42 | 0.70 | 0.95 | -999 |
| 2 | -22.50 | -32.84 | 0.40 | 0.79 | 0.78 | -999 |
| 2 | -22.50 | -32.64 | 0.43 | 0.77 | 0.74 | -999 |
| 2 | -22.64 | -32.74 | 0.44 | 0.77 | 0.90 | -999 |
| 2 | -22.85 | -32.88 | 0.45 | 0.81 | 0.92 | -999 |
| 2 | -23.00 | -32.95 | 0.43 | 0.76 | 0.67 | -999 |
| 2 | -23.08 | -32.98 | 0.43 | 0.73 | 0.91 | -999 |
| 2 | -23.36 | -33.11 | 0.44 | 0.80 | 0.93 | -999 |
| 2 | -23.63 | -33.24 | 0.42 | 0.78 | 1.02 | -999 |
| 2 | -23.91 | -33.37 | 0.43 | 0.81 | 1.23 | -999 |
| 2 | -24.00 | -33.41 | 0.45 | 0.72 | 0.79 | -999 |
| 2 | -24.27 | -33.55 | 0.42 | 0.81 | 1.15 | -999 |
| 2 | -24.54 | -33.67 | 0.42 | 0.77 | 1.11 | -999 |
| 2 | -25.30 | -34.03 | 0.47 | 0.67 | 1.02 | -999 |
| 2 | -25.58 | -34.16 | 0.43 | 0.67 | 1.06 | -999 |

|   |        |        |         |      |      |      |
|---|--------|--------|---------|------|------|------|
| 2 | -25.87 | -34.30 | 0.40    | 0.66 | 1.26 | -999 |
| 2 | -26.00 | -34.36 | 0.42    | 0.64 | 1.15 | -999 |
| 2 | -26.10 | -34.40 | 0.41    | 0.70 | 1.34 | -999 |
| 2 | -26.37 | -34.52 | 0.43    | 0.69 | 1.66 | -999 |
| 2 | -26.65 | -34.64 | 0.40    | 0.64 | 1.68 | -999 |
| 2 | -26.92 | -34.76 | 0.41    | 0.62 | 1.84 | -999 |
| 2 | -27.00 | -34.79 | 0.44    | 0.79 | 1.69 | -999 |
| 2 | -27.00 | -34.80 | 0.41    | 0.82 | 1.64 | -999 |
| 2 | -27.00 | -34.82 | 0.39    | 0.70 | 1.60 | -999 |
| 2 | -27.23 | -35.05 | 0.42    | 0.75 | 1.75 | -999 |
| 2 | -27.43 | -35.29 | 0.41    | 0.66 | 1.80 | -999 |
| 2 | -27.65 | -35.54 | 0.39    | 0.76 | 2.18 | -999 |
| 2 | -27.85 | -35.78 | 0.41    | 0.81 | 2.26 | -999 |
| 2 | -28.01 | -35.95 | 0.41    | 0.80 | 1.97 | -999 |
| 2 | -28.03 | -35.97 | 0.42    | 0.75 | 1.86 | -999 |
| 2 | -28.25 | -36.21 | 0.42    | 0.73 | 1.92 | -999 |
| 2 | -28.47 | -36.44 | 0.43    | 0.66 | 1.91 | -999 |
| 2 | -28.69 | -36.67 | 0.43    | 0.72 | 1.82 | -999 |
| 2 | -28.91 | -36.90 | 0.34    | 0.71 | 1.44 | -999 |
| 2 | -29.01 | -37.00 | 0.58    | 0.70 | 1.60 | -999 |
| 2 | -29.12 | -37.13 | 0.46    | 0.64 | 1.53 | -999 |
| 2 | -29.35 | -37.37 | 0.48    | 0.72 | 1.65 | -999 |
| 2 | -29.59 | -37.61 | -999.00 | 0.78 | 1.53 | -999 |
| 2 | -30.01 | -38.05 | 0.49    | 0.76 | 0.97 | -999 |
| 2 | -30.05 | -38.08 | 0.44    | 0.84 | 0.89 | -999 |
| 2 | -30.24 | -38.30 | 0.47    | 0.84 | 1.18 | -999 |
| 2 | -30.45 | -38.53 | 0.49    | 0.85 | 1.15 | -999 |
| 2 | -30.67 | -38.77 | 0.45    | 0.85 | 1.09 | -999 |
| 2 | -31.19 | -39.33 | 0.45    | 0.94 | 1.02 | -999 |
| 2 | -31.21 | -39.36 | 0.46    | 0.89 | 0.81 | -999 |
| 2 | -31.21 | -39.36 | 0.45    | 0.93 | 1.10 | -999 |
| 2 | -31.21 | -39.37 | 0.43    | 0.85 | 0.83 | -999 |
| 2 | -31.40 | -39.57 | 0.40    | 0.81 | 0.75 | -999 |
| 2 | -31.60 | -39.80 | 0.43    | 0.79 | 0.78 | -999 |
| 2 | -31.79 | -40.03 | 0.43    | 0.87 | 0.78 | -999 |
| 2 | -31.99 | -40.26 | 0.45    | 0.87 | 0.75 | -999 |
| 2 | -32.00 | -40.26 | 0.39    | 0.95 | 0.78 | -999 |
| 2 | -32.16 | -40.45 | 0.43    | 0.76 | 0.58 | -999 |
| 2 | -32.37 | -40.71 | 0.45    | 0.81 | 0.57 | -999 |
| 2 | -32.60 | -40.96 | 0.43    | 0.91 | 0.79 | -999 |
| 2 | -32.81 | -41.22 | 0.43    | 0.85 | 0.77 | -999 |
| 2 | -33.00 | -41.44 | 0.42    | 0.83 | 1.11 | -999 |
| 2 | -33.02 | -41.48 | 0.43    | 0.87 | 0.89 | -999 |
| 2 | -33.27 | -41.77 | 0.47    | 0.75 | 0.88 | -999 |
| 2 | -33.49 | -42.04 | 0.45    | 0.90 | 0.70 | -999 |
| 2 | -33.72 | -42.30 | 0.45    | 0.92 | 0.95 | -999 |
| 2 | -33.95 | -42.58 | 0.46    | 0.75 | 0.82 | -999 |

|   |        |        |      |      |      |      |
|---|--------|--------|------|------|------|------|
| 2 | -34.00 | -42.64 | 0.45 | 0.74 | 0.79 | -999 |
| 2 | -34.12 | -42.79 | 0.46 | 0.88 | 0.87 | -999 |
| 2 | -34.35 | -43.06 | 0.47 | 0.85 | 0.82 | -999 |
| 2 | -34.56 | -43.32 | 0.49 | 0.88 | 0.95 | -999 |
| 2 | -34.77 | -43.57 | 0.45 | 0.84 | 1.00 | -999 |
| 2 | -34.99 | -43.83 | 0.48 | 0.77 | 1.01 | -999 |
| 2 | -35.01 | -43.84 | 0.47 | 0.82 | 0.98 | -999 |
| 2 | -35.09 | -43.91 | 0.48 | 0.77 | 0.90 | -999 |
| 2 | -35.28 | -44.20 | 0.51 | 0.77 | 0.92 | -999 |
| 2 | -35.50 | -44.46 | 0.44 | 0.77 | 0.75 | -999 |
| 2 | -35.71 | -44.72 | 0.45 | 0.90 | 0.67 | -999 |
| 2 | -35.92 | -44.97 | 0.44 | 0.80 | 0.69 | -999 |
| 2 | -36.00 | -45.09 | 0.61 | 0.76 | 0.56 | -999 |
| 2 | -36.00 | -45.11 | 0.46 | 0.85 | 0.56 | -999 |
| 2 | -36.17 | -45.30 | 0.43 | 0.76 | 0.58 | -999 |
| 2 | -36.37 | -45.53 | 0.44 | 0.82 | 0.47 | -999 |
| 2 | -36.57 | -45.77 | 0.40 | 0.70 | 0.57 | -999 |
| 2 | -36.76 | -46.01 | 0.44 | 0.69 | 0.61 | -999 |
| 2 | -36.95 | -46.26 | 0.41 | 0.78 | 0.44 | -999 |
| 2 | -37.00 | -46.33 | 0.42 | 0.80 | 0.36 | -999 |
| 2 | -37.08 | -46.45 | 0.40 | 0.83 | 0.46 | -999 |
| 2 | -37.25 | -46.67 | 0.42 | 0.79 | 0.49 | -999 |
| 2 | -37.45 | -46.90 | 0.43 | 0.81 | 0.52 | -999 |
| 2 | -37.65 | -47.11 | 0.58 | 0.74 | 0.37 | -999 |
| 2 | -37.82 | -47.35 | 0.43 | 0.72 | 0.38 | -999 |
| 2 | -38.00 | -47.56 | 0.51 | 0.83 | 0.54 | -999 |
| 2 | -38.01 | -47.56 | 0.54 | 0.88 | 0.45 | -999 |
| 2 | -38.16 | -47.77 | 0.53 | 0.87 | 0.56 | -999 |
| 2 | -38.45 | -48.14 | 0.34 | 0.79 | 0.45 | -999 |
| 2 | -38.62 | -48.37 | 0.27 | 0.79 | 0.55 | -999 |
| 2 | -38.81 | -48.59 | 0.26 | 0.75 | 0.51 | -999 |
| 2 | -38.98 | -48.82 | 0.26 | 0.78 | 0.53 | -999 |
| 2 | -39.01 | -48.86 | 0.32 | 0.71 | 0.40 | -999 |
| 2 | -39.12 | -49.00 | 0.16 | 0.59 | 0.57 | -999 |
| 2 | -39.30 | -49.23 | 0.24 | 0.54 | 0.58 | -999 |
| 2 | -39.48 | -49.47 | 0.40 | 0.59 | 0.58 | -999 |
| 2 | -39.67 | -49.71 | 0.48 | 0.57 | 0.62 | -999 |
| 2 | -39.86 | -49.96 | 0.46 | 0.68 | 0.89 | -999 |
| 2 | -40.00 | -50.12 | 0.49 | 0.59 | 1.02 | -999 |
| 2 | -40.06 | -50.15 | 0.46 | 0.54 | 0.66 | -999 |
| 2 | -40.12 | -50.30 | 0.27 | 0.80 | 1.22 | -999 |
| 2 | -40.30 | -50.53 | 0.38 | 0.86 | 1.33 | -999 |
| 2 | -40.47 | -50.76 | 0.38 | 0.82 | 1.13 | -999 |
| 2 | -40.71 | -51.08 | 0.38 | 0.87 | 1.10 | -999 |
| 2 | -40.89 | -51.32 | 0.39 | 0.87 | 1.27 | -999 |
| 2 | -41.01 | -51.48 | 0.41 | 0.84 | 1.29 | -999 |
| 2 | -41.02 | -51.51 | 0.41 | 0.82 | 1.22 | -999 |

|       |        |        |      |      |      |      |
|-------|--------|--------|------|------|------|------|
| 2     | -41.03 | -51.54 | 0.42 | 0.77 | 1.32 | -999 |
| 2     | -41.11 | -51.65 | 0.44 | 0.88 | 1.81 | -999 |
| 2     | -41.31 | -51.89 | 0.48 | 0.99 | 2.11 | -999 |
| 2     | -41.50 | -52.12 | 0.52 | 1.14 | 2.17 | -999 |
| 2     | -41.66 | -52.35 | 0.49 | 0.95 | 1.68 | -999 |
| 2     | -41.82 | -52.57 | 0.51 | 0.90 | 1.40 | -999 |
| 2     | -41.97 | -52.77 | 0.59 | 1.04 | 1.46 | -999 |
| 2     | -42.10 | -52.96 | 0.48 | 0.89 | 0.58 | -999 |
| 2     | -42.26 | -53.16 | 0.47 | 0.86 | 0.55 | -999 |
| 2     | -42.33 | -53.28 | 0.52 | 1.04 | 0.65 | -999 |
| 2     | -42.45 | -53.43 | 0.50 | 0.75 | 0.67 | -999 |
| 2     | -42.56 | -53.57 | 0.44 | 0.94 | 0.64 | -999 |
| 2     | -42.72 | -53.79 | 0.47 | 0.90 | 0.58 | -999 |
| 2     | -42.86 | -53.97 | 0.47 | 0.91 | 0.46 | -999 |
| 2     | -43.01 | -54.18 | 0.49 | 0.83 | 0.48 | -999 |
| 2     | -43.20 | -54.39 | 0.49 | 0.80 | 0.53 | -999 |
| 2     | -43.42 | -54.63 | 0.47 | 0.81 | 0.46 | -999 |
| 2     | -43.63 | -54.87 | 0.52 | 0.83 | 0.50 | -999 |
| 2     | -43.81 | -55.12 | 0.53 | 0.81 | 0.53 | -999 |
| 2     | -44.01 | -55.37 | 0.55 | 0.87 | 0.54 | -999 |
| 2     | -44.21 | -55.64 | 0.58 | 0.75 | 0.63 | -999 |
| 2     | -44.42 | -55.91 | 0.69 | 0.91 | 0.68 | -999 |
| 2     | -44.46 | -55.99 | 0.71 | 0.93 | 0.75 | -999 |
| 2     | -44.50 | -56.06 | 0.66 | 0.97 | 1.15 | -999 |
| 2     | -44.70 | -56.36 | 0.67 | 1.15 | 1.06 | -999 |
| 2     | -44.90 | -56.67 | 0.65 | 1.17 | 0.69 | -999 |
| 2     | -45.02 | -56.87 | 0.61 | 0.84 | 0.53 | -999 |
| 2     | -45.21 | -57.12 | 0.58 | 0.90 | 0.52 | -999 |
| 2     | -45.34 | -57.31 | 0.57 | 0.85 | 0.62 | -999 |
| 2     | -45.45 | -57.46 | 0.61 | 0.87 | 0.54 | -999 |
| 2     | -45.51 | -57.56 | 0.57 | 0.79 | 0.61 | -999 |
| 2     | -45.58 | -57.67 | 0.57 | 0.96 | 0.53 | -999 |
| 2     | -45.65 | -57.75 | 0.57 | 0.85 | 0.59 | -999 |
| 2     | -45.71 | -57.86 | 0.59 | 0.76 | 0.51 | -999 |
| 2     | -45.75 | -57.92 | 0.58 | 0.85 | 0.66 | -999 |
| 2     | -45.84 | -58.06 | 0.59 | 0.85 | 0.72 | -999 |
| 2     | -46.03 | -58.34 | 0.59 | 0.76 | 0.58 | -999 |
| 2     | -46.20 | -58.58 | 0.62 | 0.92 | 0.66 | -999 |
| 2     | -46.37 | -58.85 | 0.68 | 0.90 | 0.62 | -999 |
| 2     | -46.43 | -58.95 | 0.77 | 0.91 | 0.79 | -999 |
| 2     | -46.61 | -59.19 | 0.78 | 1.00 | 0.76 | -999 |
| 2     | -46.80 | -59.45 | 0.74 | 0.92 | 0.92 | -999 |
| 2     | -46.99 | -59.70 | 0.84 | 1.07 | 1.14 | -999 |
| 2     | -47.21 | -60.01 | 0.83 | 1.01 | 1.17 | -999 |
| <hr/> |        |        |      |      |      |      |
| 3     | -71.70 | 175.58 | -999 | 0.78 | -999 | -999 |
| 3     | -71.57 | 175.61 | -999 | 0.44 | 0.13 | -999 |
| 3     | -71.40 | 175.63 | -999 | 0.44 | 0.20 | -999 |

|   |        |         |      |      |      |      |
|---|--------|---------|------|------|------|------|
| 3 | -71.18 | 175.66  | -999 | 0.91 | 0.40 | -999 |
| 3 | -70.96 | 175.70  | -999 | 1.31 | 0.25 | -999 |
| 3 | -69.67 | 175.90  | -999 | -999 | -999 | -999 |
| 3 | -69.46 | 175.93  | -999 | -999 | -999 | -999 |
| 3 | -69.24 | 175.96  | -999 | -999 | -999 | -999 |
| 3 | -69.03 | 176.00  | -999 | -999 | 0.25 | -999 |
| 3 | -69.07 | 176.39  | -999 | -999 | -999 | -999 |
| 3 | -69.15 | 176.85  | -999 | 0.60 | -999 | -999 |
| 3 | -69.22 | 177.31  | -999 | 0.96 | -999 | -999 |
| 3 | -69.30 | 177.79  | -999 | -999 | -999 | -999 |
| 3 | -69.52 | 178.85  | -999 | 0.64 | 0.10 | -999 |
| 3 | -69.68 | 179.53  | -999 | 1.17 | 0.10 | -999 |
| 3 | -69.80 | -179.94 | -999 | 0.54 | 0.08 | -999 |
| 3 | -69.86 | -179.38 | -999 | 0.32 | 0.13 | -999 |
| 3 | -69.90 | -179.11 | -999 | 0.87 | 0.04 | -999 |
| 3 | -69.93 | -178.69 | -999 | 0.87 | 0.07 | -999 |
| 3 | -69.97 | -178.27 | -999 | 0.46 | 0.12 | -999 |
| 3 | -70.02 | -177.86 | -999 | 0.77 | 0.07 | -999 |
| 3 | -70.06 | -177.46 | -999 | 0.29 | 0.07 | -999 |
| 3 | -70.11 | -177.05 | -999 | 0.72 | 0.13 | -999 |
| 3 | -70.23 | -177.00 | -999 | 0.57 | 0.07 | -999 |
| 3 | -70.38 | -177.00 | -999 | 0.13 | 0.09 | -999 |
| 3 | -70.47 | -177.00 | -999 | 0.26 | 0.14 | -999 |
| 3 | -70.57 | -177.00 | -999 | 0.34 | 0.09 | -999 |
| 3 | -70.87 | -177.00 | -999 | -999 | -999 | -999 |
| 3 | -70.92 | -177.00 | -999 | 0.14 | 0.03 | -999 |
| 3 | -71.00 | -176.73 | -999 | 0.76 | 0.09 | -999 |
| 3 | -71.00 | -176.60 | -999 | 0.45 | 0.18 | -999 |
| 3 | -70.82 | -176.78 | -999 | 0.34 | 0.17 | -999 |
| 3 | -70.53 | -176.73 | -999 | 0.11 | 0.10 | -999 |
| 3 | -70.42 | -176.49 | -999 | 1.05 | 0.15 | -999 |
| 3 | -70.35 | -176.75 | -999 | 0.16 | 0.14 | -999 |
| 3 | -70.33 | -177.18 | -999 | -999 | 0.05 | -999 |
| 3 | -70.28 | -177.58 | -999 | 0.44 | 0.05 | -999 |
| 3 | -70.15 | -178.69 | -999 | 0.64 | 0.16 | -999 |
| 3 | -70.14 | -178.82 | -999 | -999 | -999 | -999 |
| 3 | -70.11 | -179.10 | -999 | 0.80 | 0.13 | -999 |
| 3 | -70.07 | -179.41 | -999 | 0.22 | 0.18 | -999 |
| 3 | -70.01 | -179.96 | -999 | 0.54 | 0.09 | -999 |
| 3 | -69.94 | 179.66  | -999 | 0.22 | 0.06 | -999 |
| 3 | -69.88 | 179.27  | -999 | 0.31 | 0.03 | -999 |
| 3 | -69.82 | 178.88  | -999 | 0.11 | 0.14 | -999 |
| 3 | -69.75 | 178.50  | -999 | 0.17 | 0.05 | -999 |
| 3 | -69.69 | 178.13  | -999 | 0.33 | 0.10 | -999 |
| 3 | -69.63 | 177.77  | -999 | 0.43 | 0.08 | -999 |
| 3 | -69.57 | 177.42  | -999 | 0.24 | 0.15 | -999 |
| 3 | -69.51 | 177.06  | -999 | 0.78 | 0.15 | -999 |

|   |        |         |      |      |      |      |
|---|--------|---------|------|------|------|------|
| 3 | -69.45 | 176.69  | -999 | 0.43 | 0.10 | -999 |
| 3 | -69.39 | 176.33  | -999 | 0.35 | 0.07 | -999 |
| 3 | -69.31 | 176.02  | -999 | 0.94 | 0.05 | -999 |
| 3 | -69.18 | 176.12  | -999 | 0.59 | 0.11 | -999 |
| 3 | -69.05 | 176.22  | -999 | 0.94 | 0.14 | -999 |
| 3 | -68.92 | 176.33  | -999 | 0.44 | 0.12 | -999 |
| 3 | -68.78 | 176.43  | -999 | 1.51 | 0.06 | -999 |
| 3 | -68.71 | 176.49  | -999 | 0.09 | 0.13 | -999 |
| 3 | -68.61 | 176.57  | -999 | 0.44 | -999 | -999 |
| 3 | -68.58 | 177.47  | -999 | 0.09 | 0.08 | -999 |
| 3 | -68.65 | 177.92  | -999 | 0.27 | 0.08 | -999 |
| 3 | -68.72 | 178.34  | -999 | 0.23 | 0.07 | -999 |
| 3 | -68.78 | 178.78  | -999 | 0.25 | 0.22 | -999 |
| 3 | -68.85 | 179.23  | -999 | -999 | 0.07 | -999 |
| 3 | -68.91 | 179.68  | -999 | 0.20 | 0.14 | -999 |
| 3 | -68.97 | -179.88 | -999 | 0.20 | 0.11 | -999 |
| 3 | -69.03 | -179.44 | -999 | -999 | 0.23 | -999 |
| 3 | -69.09 | -178.98 | -999 | -999 | 0.25 | -999 |
| 3 | -69.23 | -177.98 | -999 | -999 | 0.06 | -999 |
| 3 | -68.99 | -174.10 | -999 | -999 | -999 | -999 |
| 3 | -68.92 | -173.71 | -999 | -999 | 0.39 | -999 |
| 3 | -69.08 | -173.75 | -999 | -999 | 0.35 | -999 |
| 3 | -69.24 | -173.74 | -999 | 1.14 | 0.44 | -999 |
| 3 | -69.18 | -173.61 | -999 | 0.99 | 0.33 | -999 |
| 3 | -69.33 | -173.87 | -999 | 0.70 | 0.32 | -999 |
| 3 | -69.50 | -173.85 | -999 | 0.77 | 0.58 | -999 |
| 3 | -69.78 | -174.03 | -999 | 0.77 | 0.10 | -999 |
| 3 | -69.91 | -174.14 | -999 | 0.56 | 0.21 | -999 |
| 3 | -70.04 | -174.20 | -999 | 0.51 | 0.14 | -999 |
| 3 | -70.16 | -174.28 | -999 | -999 | -999 | -999 |
| 3 | -70.27 | -174.33 | -999 | 0.70 | 0.23 | -999 |
| 3 | -70.40 | -174.41 | -999 | 0.73 | 0.11 | -999 |
| 3 | -70.51 | -174.45 | -999 | 0.56 | 0.17 | -999 |
| 3 | -70.63 | -174.51 | -999 | 0.37 | 0.20 | -999 |
| 3 | -70.75 | -174.57 | -999 | 0.51 | 0.20 | -999 |
| 3 | -70.87 | -174.64 | -999 | 0.43 | 0.17 | -999 |
| 3 | -70.98 | -174.68 | -999 | 0.35 | 0.09 | -999 |
| 3 | -71.11 | -174.76 | -999 | 0.29 | 0.12 | -999 |
| 3 | -71.25 | -174.84 | -999 | 0.32 | 0.13 | -999 |
| 3 | -71.37 | -174.91 | -999 | 0.23 | 0.14 | -999 |
| 3 | -71.54 | -174.97 | -999 | 0.32 | 0.07 | -999 |
| 3 | -71.54 | -174.36 | -999 | 0.35 | 0.10 | -999 |
| 3 | -71.54 | -174.00 | -999 | 0.41 | 0.10 | -999 |
| 3 | -71.53 | -173.47 | -999 | 0.50 | 0.14 | -999 |
| 3 | -71.53 | -173.09 | -999 | 0.48 | 0.12 | -999 |
| 3 | -70.87 | -172.79 | -999 | 0.48 | 0.25 | -999 |
| 3 | -70.74 | -172.73 | -999 | 0.43 | 0.20 | -999 |

|   |        |         |      |      |      |      |
|---|--------|---------|------|------|------|------|
| 3 | -70.60 | -172.66 | -999 | 0.65 | 0.31 | -999 |
| 3 | -70.47 | -172.58 | -999 | 0.56 | 0.30 | -999 |
| 3 | -70.30 | -172.54 | -999 | 0.56 | 0.44 | -999 |
| 3 | -70.17 | -172.21 | -999 | 0.61 | 0.46 | -999 |
| 3 | -70.17 | -171.57 | -999 | 0.35 | 0.35 | -999 |
| 3 | -70.17 | -170.90 | -999 | 0.35 | 0.22 | -999 |
| 3 | -70.17 | -170.22 | -999 | 0.42 | 0.34 | -999 |
| 3 | -70.24 | -170.00 | -999 | 0.75 | 0.13 | -999 |
| 3 | -70.93 | -169.99 | -999 | 0.51 | 0.16 | -999 |
| 3 | -71.05 | -170.00 | -999 | 0.87 | 0.24 | -999 |
| 3 | -71.17 | -170.00 | -999 | 0.75 | 0.17 | -999 |
| 3 | -71.30 | -170.00 | -999 | 0.75 | 0.18 | -999 |
| 3 | -71.44 | -170.00 | -999 | 0.77 | 0.15 | -999 |
| 3 | -71.57 | -169.90 | -999 | 0.79 | 0.21 | -999 |
| 3 | -71.70 | -169.82 | -999 | 0.72 | 0.21 | -999 |
| 3 | -71.85 | -169.84 | -999 | 0.71 | 0.46 | -999 |
| 3 | -71.99 | -169.84 | -999 | 0.73 | 0.31 | -999 |
| 3 | -72.14 | -169.84 | -999 | 0.88 | 0.41 | -999 |
| 3 | -72.30 | -168.42 | -999 | 0.73 | 0.34 | -999 |
| 3 | -72.30 | -167.66 | -999 | 0.79 | 0.46 | -999 |
| 3 | -72.31 | -166.91 | -999 | 0.83 | 0.27 | -999 |
| 3 | -72.32 | -166.16 | -999 | 0.73 | 0.19 | -999 |
| 3 | -72.31 | -165.38 | -999 | 0.92 | 0.17 | -999 |
| 3 | -72.33 | -164.60 | -999 | -999 | 0.20 | -999 |
| 3 | -72.34 | -163.79 | -999 | 1.06 | 0.19 | -999 |
| 3 | -72.34 | -162.98 | -999 | 0.59 | 0.26 | -999 |
| 3 | -72.35 | -162.17 | -999 | 0.77 | 0.26 | -999 |
| 3 | -72.36 | -161.39 | -999 | 0.78 | 0.29 | -999 |
| 3 | -72.36 | -160.60 | -999 | 0.84 | 0.15 | -999 |
| 3 | -72.33 | -159.99 | -999 | 0.99 | 0.41 | -999 |
| 3 | -72.17 | -160.03 | -999 | 0.39 | 0.26 | -999 |
| 3 | -71.91 | -160.00 | -999 | 0.98 | 0.35 | -999 |
| 3 | -71.81 | -159.85 | -999 | 0.75 | 0.31 | -999 |
| 3 | -71.81 | -159.38 | -999 | 0.88 | 0.33 | -999 |
| 3 | -71.81 | -158.90 | -999 | 0.68 | 0.36 | -999 |
| 3 | -71.81 | -158.42 | -999 | 0.65 | 0.25 | -999 |
| 3 | -71.82 | -157.99 | -999 | 0.69 | 0.25 | -999 |
| 3 | -71.97 | -158.00 | -999 | 0.53 | 0.29 | -999 |
| 3 | -72.12 | -157.99 | -999 | 0.74 | 0.36 | -999 |
| 3 | -72.27 | -158.00 | -999 | 0.67 | 0.30 | -999 |
| 3 | -72.64 | -158.26 | -999 | -999 | 0.08 | -999 |
| 3 | -72.61 | -158.74 | -999 | -999 | 0.15 | -999 |
| 3 | -72.59 | -159.24 | -999 | 0.25 | 0.34 | -999 |
| 3 | -72.57 | -159.72 | -999 | 0.70 | 0.18 | -999 |
| 3 | -72.48 | -160.00 | -999 | 0.61 | 0.23 | -999 |
| 3 | -72.36 | -159.87 | -999 | 1.10 | 0.37 | -999 |
| 3 | -72.37 | -159.37 | -999 | 1.13 | 0.27 | -999 |



|   |        |         |      |      |      |      |
|---|--------|---------|------|------|------|------|
| 3 | -72.38 | -158.04 | 0.76 | 0.98 | 0.28 | -999 |
| 3 | -72.39 | -157.54 | -999 | -999 | -999 | -999 |
| 3 | -72.39 | -157.05 | 0.78 | 1.37 | 0.36 | -999 |
| 3 | -72.40 | -156.55 | 0.80 | 1.42 | 0.26 | -999 |
| 3 | -72.40 | -156.05 | -999 | 1.90 | 0.31 | -999 |
| 3 | -72.41 | -155.56 | -999 | 1.22 | 0.25 | -999 |
| 3 | -72.41 | -155.05 | 0.50 | 0.20 | 0.15 | -999 |
| 3 | -72.41 | -154.55 | 0.45 | 0.77 | 0.20 | -999 |
| 3 | -72.42 | -154.03 | 0.42 | 0.74 | 0.15 | -999 |
| 3 | -72.42 | -153.55 | 0.61 | 0.95 | 0.23 | -999 |
| 3 | -72.42 | -153.11 | 0.36 | 0.51 | 0.19 | -999 |
| 3 | -72.41 | -152.67 | 0.54 | 0.83 | 0.33 | -999 |
| 3 | -72.48 | -152.49 | 0.53 | 0.53 | 0.16 | -999 |
| 3 | -72.61 | -152.50 | 0.42 | 0.68 | 0.26 | -999 |
| 3 | -72.75 | -152.50 | 0.50 | 0.70 | 0.28 | -999 |
| 3 | -72.99 | -152.50 | 0.48 | 0.63 | 0.23 | -999 |
| 3 | -73.12 | -152.50 | 0.54 | 0.48 | 0.28 | -999 |
| 3 | -73.25 | -152.50 | 0.47 | 0.92 | 0.27 | -999 |
| 3 | -73.29 | -151.74 | 0.43 | 0.64 | 0.27 | -999 |
| 3 | -73.29 | -151.29 | 0.33 | 0.64 | 0.20 | -999 |
| 3 | -73.29 | -150.89 | 0.40 | 0.64 | 0.22 | -999 |
| 3 | -73.29 | -150.45 | 0.43 | 0.93 | 0.25 | -999 |
| 3 | -73.30 | -150.02 | 0.59 | 0.74 | 0.21 | -999 |
| 3 | -73.43 | -150.01 | 0.52 | 0.99 | 0.22 | -999 |
| 3 | -73.56 | -150.03 | 0.60 | 0.95 | 0.21 | -999 |
| 3 | -73.69 | -150.03 | 0.58 | 0.71 | 0.19 | -999 |
| 3 | -73.81 | -150.04 | 0.55 | 0.58 | 0.18 | -999 |
| 3 | -73.93 | -150.15 | 0.62 | 0.77 | 0.20 | -999 |
| 3 | -74.00 | -150.57 | 0.60 | 0.70 | 0.18 | -999 |
| 3 | -73.78 | -151.00 | 0.67 | 0.57 | 0.23 | -999 |
| 3 | -73.64 | -150.97 | 0.75 | 0.60 | 0.19 | -999 |
| 3 | -73.59 | -151.35 | 0.73 | 0.55 | 0.18 | -999 |
| 3 | -73.58 | -151.80 | 0.65 | 0.62 | 0.18 | -999 |
| 3 | -73.67 | -151.96 | 0.61 | 0.63 | 0.14 | -999 |
| 3 | -73.78 | -151.94 | 0.54 | 0.61 | 0.16 | -999 |
| 3 | -73.88 | -152.00 | 0.59 | 0.57 | 0.19 | -999 |
| 3 | -74.04 | -152.37 | 0.55 | 0.66 | 0.11 | -999 |
| 3 | -73.95 | -152.54 | 0.64 | 0.77 | 0.14 | -999 |
| 3 | -73.81 | -152.48 | 0.61 | 0.71 | 0.20 | -999 |
| 3 | -73.69 | -152.46 | 0.65 | 0.41 | 0.18 | -999 |
| 3 | -73.57 | -152.53 | -999 | -999 | -999 | -999 |
| 3 | -73.48 | -152.42 | 0.68 | 0.80 | 0.22 | -999 |
| 3 | -73.48 | -152.03 | 0.67 | 0.80 | 0.17 | -999 |
| 3 | -73.48 | -151.65 | 0.74 | 0.72 | 0.16 | -999 |
| 3 | -73.48 | -151.28 | 0.72 | 0.70 | 0.17 | -999 |
| 3 | -73.45 | -150.99 | -999 | 0.87 | 0.15 | -999 |
| 3 | -73.33 | -151.01 | 0.83 | 0.77 | 0.19 | -999 |

|   |        |         |      |      |      |      |
|---|--------|---------|------|------|------|------|
| 3 | -72.84 | -151.00 | -999 | -999 | 0.17 | -999 |
| 3 | -72.82 | -151.40 | 0.71 | 0.76 | 0.09 | -999 |
| 3 | -72.79 | -151.84 | -999 | -999 | 0.14 | -999 |
| 3 | -72.72 | -151.55 | 0.63 | 0.71 | 0.12 | -999 |
| 3 | -72.72 | -151.13 | 0.65 | 0.61 | 0.16 | -999 |
| 3 | -72.71 | -150.70 | 0.59 | 0.70 | 0.14 | -999 |
| 3 | -72.72 | -150.27 | 0.62 | 0.88 | 0.14 | -999 |
| 3 | -72.66 | -149.99 | 0.62 | 0.74 | 0.18 | -999 |
| 3 | -72.53 | -150.01 | 0.68 | 0.64 | 0.15 | -999 |
| 3 | -72.40 | -150.02 | 0.69 | 0.92 | 0.17 | -999 |
| 3 | -72.24 | -149.97 | 0.65 | 0.85 | 0.13 | -999 |
| 3 | -72.10 | -150.01 | 0.72 | 0.65 | 0.19 | -999 |
| 3 | -71.98 | -149.79 | -999 | -999 | 0.14 | -999 |
| 3 | -71.86 | -149.74 | 0.60 | 0.72 | 0.18 | -999 |
| 3 | -71.72 | -149.44 | 0.78 | 0.68 | 0.17 | -999 |
| 3 | -71.55 | -149.12 | 0.72 | 0.86 | 0.21 | -999 |
| 3 | -71.34 | -148.69 | 0.74 | 0.77 | 0.13 | -999 |
| 3 | -71.16 | -148.34 | 0.53 | 0.63 | 0.18 | -999 |
| 3 | -70.99 | -147.93 | 0.59 | 0.82 | 0.15 | -999 |
| 3 | -70.87 | -147.34 | 0.52 | 0.62 | 0.15 | -999 |
| 3 | -70.54 | -145.61 | 0.50 | 0.94 | 0.12 | -999 |
| 3 | -70.43 | -145.05 | 0.51 | 0.81 | 0.19 | -999 |
| 3 | -70.32 | -144.48 | 0.50 | 0.61 | 0.11 | -999 |
| 3 | -70.21 | -143.93 | 0.45 | 0.67 | 0.18 | -999 |
| 3 | -70.10 | -143.39 | 0.49 | 0.78 | 0.13 | -999 |
| 3 | -69.99 | -142.85 | 0.55 | 0.75 | 0.18 | -999 |
| 3 | -69.89 | -142.30 | 0.45 | 0.66 | 0.20 | -999 |
| 3 | -69.84 | -142.24 | 0.50 | 0.66 | 0.23 | -999 |
| 3 | -69.71 | -141.96 | 0.48 | 0.86 | 0.15 | -999 |
| 3 | -69.61 | -141.45 | 0.57 | 0.72 | 0.19 | -999 |
| 3 | -69.55 | -140.92 | 0.56 | 0.86 | 0.21 | -999 |
| 3 | -69.48 | -140.36 | -999 | -999 | -999 | -999 |
| 3 | -69.29 | -139.38 | 0.56 | 0.83 | 0.12 | -999 |
| 3 | -69.18 | -138.88 | 0.55 | 0.99 | 0.16 | -999 |
| 3 | -69.07 | -138.37 | 0.55 | 0.99 | 0.17 | -999 |
| 3 | -69.07 | -137.93 | 0.50 | 0.85 | 0.13 | -999 |
| 3 | -69.29 | -137.72 | 0.54 | 0.92 | 0.19 | -999 |
| 3 | -69.49 | -137.52 | 0.59 | 0.82 | 0.17 | -999 |
| 3 | -69.70 | -137.32 | 0.56 | 0.88 | 0.17 | -999 |
| 3 | -69.91 | -137.11 | 0.63 | 0.70 | 0.17 | -999 |
| 3 | -70.12 | -136.91 | 0.55 | 0.69 | 0.16 | -999 |
| 3 | -70.32 | -136.70 | 0.63 | 0.66 | 0.20 | -999 |
| 3 | -70.50 | -136.49 | 0.68 | 0.73 | 0.19 | -999 |
| 3 | -70.70 | -136.31 | 0.90 | 0.63 | 0.23 | -999 |
| 3 | -70.89 | -136.13 | 0.94 | 0.63 | 0.19 | -999 |
| 3 | -71.05 | -135.93 | 0.88 | 0.71 | 0.28 | -999 |
| 3 | -71.25 | -135.57 | 0.93 | 0.61 | 0.19 | -999 |

|   |        |         |      |      |      |      |
|---|--------|---------|------|------|------|------|
| 3 | -71.25 | -135.17 | 1.04 | 0.80 | 0.25 | -999 |
| 3 | -71.25 | -134.78 | 1.05 | 0.78 | 0.26 | -999 |
| 3 | -71.25 | -133.97 | 0.89 | 0.81 | 0.25 | -999 |
| 3 | -71.31 | -133.57 | 1.00 | 0.63 | 0.34 | -999 |
| 3 | -71.39 | -133.27 | 1.04 | 0.80 | 0.28 | -999 |
| 3 | -71.46 | -132.98 | -999 | 0.93 | 0.47 | -999 |
| 3 | -71.55 | -132.65 | -999 | 0.84 | 0.99 | -999 |
| 3 | -71.66 | -132.26 | -999 | 1.01 | 0.58 | -999 |
| 3 | -71.78 | -131.81 | -999 | 0.88 | 0.47 | -999 |
| 3 | -71.92 | -131.32 | 1.05 | 0.85 | 0.42 | -999 |
| 3 | -72.05 | -130.80 | 0.98 | 0.73 | 0.34 | -999 |
| 3 | -72.17 | -130.28 | 0.93 | 0.79 | 0.32 | -999 |
| 3 | -72.02 | -130.62 | 0.91 | 0.83 | 0.30 | -999 |
| 3 | -71.88 | -131.12 | 0.98 | 0.73 | 0.31 | -999 |
| 3 | -71.70 | -131.80 | 0.95 | 0.80 | 0.43 | -999 |
| 3 | -71.56 | -132.21 | 1.28 | 0.97 | 0.38 | -999 |
| 3 | -71.39 | -132.35 | 1.28 | 0.87 | 0.31 | -999 |
| 3 | -71.22 | -132.07 | 1.20 | 1.13 | 0.38 | -999 |
| 3 | -71.06 | -131.88 | -999 | -999 | 0.29 | -999 |
| 3 | -70.74 | -131.30 | -999 | -999 | -999 | -999 |
| 3 | -69.75 | -129.47 | 1.15 | 0.90 | 0.47 | -999 |
| 3 | -69.70 | -129.15 | 0.98 | 0.99 | 0.48 | -999 |
| 3 | -69.81 | -129.22 | 1.05 | 0.63 | 0.39 | -999 |
| 3 | -69.88 | -129.66 | 0.94 | 0.98 | 0.56 | -999 |
| 3 | -69.72 | -129.75 | 0.97 | 0.97 | 0.57 | -999 |
| 3 | -69.62 | -129.75 | 0.98 | 0.59 | 0.93 | -999 |
| 3 | -69.49 | -129.75 | 1.16 | 1.38 | 0.84 | -999 |
| 3 | -69.37 | -129.75 | 1.22 | 0.95 | 1.20 | -999 |
| 3 | -69.26 | -129.75 | 1.09 | 0.88 | 0.77 | -999 |
| 3 | -69.13 | -129.75 | 0.99 | 0.98 | 0.70 | -999 |
| 3 | -69.01 | -129.76 | 1.04 | 0.93 | 0.56 | -999 |
| 3 | -68.90 | -129.92 | 0.85 | 1.08 | 0.51 | -999 |
| 3 | -68.79 | -130.11 | 0.86 | 1.04 | 0.37 | -999 |
| 3 | -68.67 | -130.31 | 0.90 | 0.97 | 0.51 | -999 |
| 3 | -68.56 | -130.50 | 0.96 | 1.00 | 0.40 | -999 |
| 3 | -68.45 | -130.69 | 1.07 | 0.90 | 0.40 | -999 |
| 3 | -68.34 | -130.87 | 0.90 | 0.89 | 0.41 | -999 |
| 3 | -68.23 | -131.05 | 1.13 | 0.72 | 0.48 | -999 |
| 3 | -68.12 | -131.23 | 1.12 | 0.95 | 0.41 | -999 |
| 3 | -68.02 | -131.40 | 1.23 | 1.01 | 0.52 | -999 |
| 3 | -67.91 | -131.57 | 1.19 | 1.16 | 0.56 | -999 |
| 3 | -67.81 | -131.75 | 1.17 | 0.79 | 0.55 | -999 |
| 3 | -67.70 | -131.92 | 1.40 | 0.94 | 0.59 | -999 |
| 3 | -67.59 | -132.11 | 1.29 | 0.85 | 0.56 | -999 |
| 3 | -67.45 | -132.33 | 1.49 | 1.23 | 0.66 | -999 |
| 3 | -67.33 | -132.52 | 1.60 | 1.19 | 0.78 | -999 |
| 3 | -67.23 | -132.54 | 1.48 | 1.14 | 0.74 | -999 |

|   |        |         |      |      |      |      |
|---|--------|---------|------|------|------|------|
| 3 | -67.13 | -132.13 | 1.21 | 1.26 | 0.58 | -999 |
| 3 | -67.11 | -131.87 | 0.99 | 0.82 | 0.46 | -999 |
| 3 | -67.21 | -131.67 | 0.96 | 0.85 | 0.36 | -999 |
| 3 | -67.32 | -131.48 | 0.92 | 0.70 | 0.37 | -999 |
| 3 | -67.42 | -131.28 | 0.88 | 0.89 | 0.37 | -999 |
| 3 | -67.53 | -131.08 | 0.83 | 0.98 | 0.32 | -999 |
| 3 | -67.63 | -130.88 | 0.80 | 0.83 | 0.31 | -999 |
| 3 | -67.73 | -130.69 | 0.75 | 0.83 | 0.44 | -999 |
| 3 | -67.83 | -130.50 | 0.73 | 0.83 | 0.31 | -999 |
| 3 | -67.94 | -130.30 | 0.80 | 0.87 | 0.46 | -999 |
| 3 | -68.04 | -130.10 | 0.80 | 0.87 | 0.43 | -999 |
| 3 | -68.14 | -129.90 | 0.74 | 0.87 | 0.33 | -999 |
| 3 | -68.24 | -129.71 | 0.80 | 0.92 | 0.35 | -999 |
| 3 | -68.34 | -129.51 | 0.84 | 0.91 | 0.44 | -999 |
| 3 | -68.44 | -129.31 | 0.79 | 1.02 | 0.41 | -999 |
| 3 | -68.51 | -129.17 | 0.81 | 0.83 | 0.44 | -999 |
| 3 | -68.62 | -128.96 | 0.81 | 0.88 | 0.36 | -999 |
| 3 | -68.73 | -128.75 | 0.98 | 1.16 | 0.84 | -999 |
| 3 | -68.84 | -128.52 | 0.86 | 1.16 | 0.33 | -999 |
| 3 | -68.94 | -128.31 | 0.79 | 1.29 | 0.37 | -999 |
| 3 | -69.05 | -128.09 | 0.84 | 0.72 | 0.39 | -999 |
| 3 | -69.15 | -127.89 | 0.84 | 1.04 | 0.33 | -999 |
| 3 | -69.17 | -127.59 | 0.95 | 0.97 | 0.29 | -999 |
| 3 | -69.14 | -127.24 | 0.93 | 0.84 | 0.30 | -999 |
| 3 | -69.10 | -126.88 | 0.91 | 1.12 | 0.28 | -999 |
| 3 | -69.05 | -126.52 | 0.87 | 0.80 | 0.33 | -999 |
| 3 | -69.02 | -126.16 | 0.92 | 0.98 | 0.29 | -999 |
| 3 | -68.97 | -125.81 | 0.89 | 1.12 | 0.38 | -999 |
| 3 | -68.93 | -125.45 | 0.75 | 0.76 | 0.41 | -999 |
| 3 | -68.90 | -125.11 | 0.85 | 0.92 | 0.32 | -999 |
| 3 | -68.86 | -124.78 | 0.89 | 0.67 | 0.37 | -999 |
| 3 | -68.80 | -124.58 | 0.98 | 0.86 | 0.31 | -999 |
| 3 | -68.70 | -124.82 | 0.97 | 0.86 | 0.35 | -999 |
| 3 | -68.59 | -125.05 | 0.90 | 0.85 | 0.24 | -999 |
| 3 | -68.48 | -125.27 | 0.92 | 0.81 | 0.18 | -999 |
| 3 | -68.39 | -125.48 | 0.90 | 0.99 | 0.21 | -999 |
| 3 | -68.29 | -125.69 | 0.85 | 0.91 | 0.21 | -999 |
| 3 | -68.19 | -125.90 | 0.85 | 0.67 | 0.14 | -999 |
| 3 | -68.09 | -126.11 | 0.71 | 0.94 | 0.21 | -999 |
| 3 | -67.98 | -126.32 | 0.76 | 0.75 | 0.12 | -999 |
| 3 | -67.88 | -126.53 | 0.74 | 0.70 | 0.17 | -999 |
| 3 | -67.78 | -126.75 | 0.70 | 0.85 | 0.16 | -999 |
| 3 | -67.67 | -126.95 | 0.72 | 0.55 | 0.18 | -999 |
| 3 | -67.57 | -127.15 | 0.67 | 0.55 | 0.14 | -999 |
| 3 | -67.47 | -127.35 | 0.76 | 0.56 | 0.21 | -999 |
| 3 | -67.38 | -127.55 | 0.66 | 0.88 | 0.13 | -999 |
| 3 | -67.27 | -127.76 | 0.70 | 0.63 | 0.14 | -999 |

|   |        |         |      |      |      |      |
|---|--------|---------|------|------|------|------|
| 3 | -67.17 | -127.96 | 0.76 | 0.65 | 0.14 | -999 |
| 3 | -67.07 | -128.16 | 0.80 | 0.71 | 0.20 | -999 |
| 3 | -66.98 | -128.36 | 0.75 | 0.82 | 0.12 | -999 |
| 3 | -66.87 | -128.56 | 0.72 | 0.83 | 0.18 | -999 |
| 3 | -66.77 | -128.78 | 0.76 | 0.76 | 0.20 | -999 |
| 3 | -66.66 | -128.99 | -999 | -999 | 0.20 | -999 |
| 3 | -66.56 | -129.21 | 0.76 | 0.98 | 0.14 | -999 |
| 3 | -66.45 | -129.42 | 0.75 | 0.86 | 0.21 | -999 |
| 3 | -66.36 | -129.33 | 0.71 | 0.71 | 0.17 | -999 |
| 3 | -66.29 | -129.08 | 0.68 | 0.67 | 0.17 | -999 |
| 3 | -66.21 | -128.83 | 0.68 | 0.57 | 0.19 | -999 |
| 3 | -66.13 | -128.57 | 0.77 | 0.80 | 0.17 | -999 |
| 3 | -66.05 | -128.31 | 0.72 | 0.77 | 0.17 | -999 |
| 3 | -65.97 | -128.05 | 0.74 | 0.72 | 0.15 | -999 |
| 3 | -65.92 | -127.80 | 0.77 | 0.75 | 0.15 | -999 |
| 3 | -66.01 | -127.62 | 0.74 | 0.83 | 0.16 | -999 |
| 3 | -66.12 | -127.43 | 0.63 | 0.73 | 0.16 | -999 |
| 3 | -66.21 | -127.25 | 0.71 | 0.69 | 0.14 | -999 |
| 3 | -66.32 | -127.06 | 0.72 | 0.91 | 0.18 | -999 |
| 3 | -66.43 | -126.87 | 0.97 | 0.74 | 0.34 | -999 |
| 3 | -66.54 | -126.65 | 0.76 | 0.88 | 0.23 | -999 |
| 3 | -66.64 | -126.46 | 0.77 | 0.77 | 0.20 | -999 |
| 3 | -66.74 | -126.28 | 0.75 | 0.73 | 0.18 | -999 |
| 3 | -66.84 | -126.08 | 0.74 | 0.86 | 0.19 | -999 |
| 3 | -66.95 | -125.88 | 0.82 | 0.82 | 0.22 | -999 |
| 3 | -67.05 | -125.68 | 0.78 | 0.73 | 0.20 | -999 |
| 3 | -67.16 | -125.48 | 0.81 | 0.93 | 0.28 | -999 |
| 3 | -67.27 | -125.28 | 0.87 | 0.88 | 0.21 | -999 |
| 3 | -67.37 | -125.06 | 0.95 | 0.76 | 0.24 | -999 |
| 3 | -67.48 | -124.86 | 0.99 | 0.78 | 0.28 | -999 |
| 3 | -67.59 | -124.65 | 0.85 | 0.75 | 0.21 | -999 |
| 3 | -67.70 | -124.45 | 0.82 | 0.70 | 0.18 | -999 |
| 3 | -67.80 | -124.24 | -999 | -999 | -999 | -999 |
| 3 | -67.90 | -124.04 | 0.87 | 0.86 | 0.21 | -999 |
| 3 | -68.01 | -123.83 | 0.87 | 0.93 | 0.20 | -999 |
| 3 | -68.11 | -123.63 | 0.81 | 0.90 | 0.23 | -999 |
| 3 | -68.21 | -123.43 | 0.85 | 1.05 | 0.24 | -999 |
| 3 | -68.32 | -123.21 | 0.97 | 0.77 | 0.21 | -999 |
| 3 | -68.43 | -122.99 | 0.87 | 0.85 | 0.14 | -999 |
| 3 | -68.54 | -122.78 | 0.90 | 0.72 | 0.23 | -999 |
| 3 | -68.63 | -122.46 | 0.98 | -999 | 0.17 | -999 |
| 3 | -68.65 | -122.26 | 0.94 | 0.84 | 0.21 | -999 |
| 3 | -68.69 | -121.79 | 0.89 | 0.93 | 0.26 | -999 |
| 3 | -68.73 | -121.28 | 0.83 | 0.59 | 0.22 | -999 |
| 3 | -68.82 | -120.84 | 0.95 | 0.77 | 0.20 | -999 |
| 3 | -69.00 | -120.60 | 0.93 | 0.79 | 0.29 | -999 |
| 3 | -69.18 | -120.37 | 0.90 | 0.86 | 0.30 | -999 |

|   |        |         |      |      |      |      |
|---|--------|---------|------|------|------|------|
| 3 | -69.36 | -120.14 | 0.98 | 0.80 | 0.38 | -999 |
| 3 | -69.54 | -119.89 | 1.05 | 0.88 | 0.30 | -999 |
| 3 | -69.71 | -119.65 | 0.99 | 0.92 | 0.39 | -999 |
| 3 | -69.89 | -119.41 | 0.97 | 0.96 | 0.44 | -999 |
| 3 | -70.07 | -119.18 | 1.06 | 0.73 | 0.47 | -999 |
| 3 | -70.26 | -118.89 | 1.10 | 0.82 | 0.51 | -999 |
| 3 | -70.39 | -119.07 | 1.14 | 0.99 | 0.50 | -999 |
| 3 | -70.43 | -119.74 | 1.19 | 0.99 | 0.49 | -999 |
| 3 | -70.47 | -120.40 | 1.09 | 0.84 | 0.44 | -999 |
| 3 | -70.50 | -121.00 | 1.20 | 0.75 | 0.49 | -999 |
| 3 | -70.52 | -121.42 | 1.18 | 0.73 | 0.44 | -999 |
| 3 | -70.41 | -121.59 | 1.07 | 0.71 | 0.41 | -999 |
| 3 | -69.72 | -122.18 | 0.89 | 0.67 | 0.43 | -999 |
| 3 | -69.51 | -122.35 | 0.89 | 0.90 | 0.45 | -999 |
| 3 | -69.30 | -122.52 | 0.86 | 0.73 | 0.35 | -999 |
| 3 | -69.09 | -122.69 | 0.85 | 0.84 | 0.36 | -999 |
| 3 | -68.89 | -122.85 | 0.85 | 0.92 | 0.33 | -999 |
| 3 | -69.01 | -122.98 | 0.87 | 1.12 | 0.33 | -999 |
| 3 | -69.07 | -123.43 | 0.77 | 0.88 | 0.29 | -999 |
| 3 | -69.07 | -124.02 | 0.84 | 0.99 | 0.31 | -999 |
| 3 | -69.18 | -123.92 | 0.86 | 0.93 | 0.30 | -999 |
| 3 | -69.18 | -123.34 | 0.81 | 0.60 | 0.21 | -999 |
| 3 | -69.15 | -122.78 | 0.81 | 0.85 | 0.34 | -999 |
| 3 | -69.10 | -123.32 | 0.85 | 0.63 | 0.28 | -999 |
| 3 | -69.13 | -123.51 | 0.81 | 0.54 | 0.23 | -999 |
| 3 | -69.01 | -123.25 | 0.75 | 0.59 | 0.30 | -999 |
| 3 | -68.99 | -123.69 | 0.68 | 0.58 | 0.31 | -999 |
| 3 | -69.00 | -124.23 | 0.77 | 0.65 | 0.39 | -999 |
| 3 | -69.21 | -124.22 | 0.84 | 0.67 | 0.28 | -999 |
| 3 | -69.40 | -124.19 | 0.85 | 0.66 | 0.27 | -999 |
| 3 | -69.56 | -124.18 | 0.79 | 0.42 | 0.27 | -999 |
| 3 | -69.70 | -124.17 | 0.76 | 0.75 | 0.29 | -999 |
| 3 | -69.13 | -127.75 | 0.77 | 0.54 | 0.22 | -999 |
| 3 | -69.26 | -127.74 | 0.74 | 0.77 | 0.22 | -999 |
| 3 | -69.39 | -127.74 | 0.72 | 0.47 | 0.23 | -999 |
| 3 | -69.49 | -127.68 | 0.73 | 0.48 | 0.20 | -999 |
| 3 | -69.64 | -127.59 | 0.65 | 0.59 | 0.20 | -999 |
| 3 | -69.72 | -127.60 | 0.66 | 0.57 | 0.21 | -999 |
| 3 | -69.68 | -127.86 | 0.71 | 0.67 | 0.28 | -999 |
| 3 | -69.59 | -128.04 | 0.63 | 0.91 | 0.28 | -999 |
| 3 | -69.46 | -128.25 | 0.62 | 0.73 | 0.24 | -999 |
| 3 | -69.34 | -128.45 | 0.53 | 0.84 | 0.20 | -999 |
| 3 | -69.22 | -128.66 | 0.53 | 0.64 | 0.20 | -999 |
| 3 | -69.10 | -128.84 | 0.53 | 0.82 | 0.26 | -999 |
| 3 | -68.98 | -129.03 | 0.54 | 0.70 | 0.23 | -999 |
| 3 | -68.85 | -129.28 | 0.61 | 0.63 | 0.22 | -999 |
| 3 | -68.75 | -129.48 | 0.65 | 0.84 | 0.20 | -999 |

|   |        |         |      |      |      |      |
|---|--------|---------|------|------|------|------|
| 3 | -68.37 | -130.17 | 0.67 | 0.64 | 0.29 | -999 |
| 3 | -68.21 | -130.41 | 0.90 | 0.96 | 0.49 | -999 |
| 3 | -68.15 | -130.18 | 1.01 | 0.84 | 0.53 | -999 |
| 3 | -68.09 | -129.97 | 0.94 | 0.94 | 0.63 | -999 |
| 3 | -68.02 | -129.72 | 0.85 | 0.91 | 0.64 | -999 |
| 3 | -67.94 | -129.46 | 0.77 | 0.88 | 0.62 | -999 |
| 3 | -67.87 | -129.19 | 0.82 | 0.92 | 0.66 | -999 |
| 3 | -67.79 | -128.91 | 0.76 | 0.98 | 0.72 | -999 |
| 3 | -67.71 | -128.64 | 0.76 | 1.01 | 0.70 | -999 |
| 3 | -67.64 | -128.37 | 0.71 | 0.97 | 0.73 | -999 |
| 3 | -67.57 | -128.11 | 0.64 | 0.93 | 0.67 | -999 |
| 3 | -67.59 | -127.88 | 0.66 | 0.96 | 0.66 | -999 |
| 3 | -67.70 | -127.68 | 0.67 | 0.95 | 0.61 | -999 |
| 3 | -67.80 | -127.48 | 0.72 | 0.88 | 0.67 | -999 |
| 3 | -67.90 | -127.26 | 0.67 | 0.93 | 0.60 | -999 |
| 3 | -68.01 | -127.05 | 0.85 | 0.87 | 0.56 | -999 |
| 3 | -68.11 | -126.83 | 0.89 | 0.89 | 0.60 | -999 |
| 3 | -68.22 | -126.62 | 0.93 | 0.92 | 0.62 | -999 |
| 3 | -68.32 | -126.41 | 1.01 | 0.81 | 0.63 | -999 |
| 3 | -68.41 | -126.29 | 1.16 | 1.04 | 0.59 | -999 |
| 3 | -68.40 | -126.63 | 1.15 | 0.89 | 0.63 | -999 |
| 3 | -68.40 | -126.96 | 1.18 | 0.95 | 0.69 | -999 |
| 3 | -68.39 | -127.27 | 1.11 | 0.85 | 0.66 | -999 |
| 3 | -68.39 | -127.53 | 1.32 | 0.95 | 0.70 | -999 |
| 3 | -68.39 | -127.79 | 1.09 | 0.94 | 0.70 | -999 |
| 3 | -68.30 | -127.97 | 1.18 | 1.04 | 0.71 | -999 |
| 3 | -68.18 | -128.07 | 1.07 | 1.02 | 0.73 | -999 |
| 3 | -68.09 | -128.24 | 1.12 | 1.06 | 0.71 | -999 |
| 3 | -68.01 | -128.46 | 0.96 | 1.06 | 0.66 | -999 |
| 3 | -67.93 | -128.68 | 0.96 | 1.12 | 0.69 | -999 |
| 3 | -67.85 | -128.90 | 0.98 | 1.02 | 0.67 | -999 |
| 3 | -67.76 | -129.10 | 0.84 | 0.94 | 0.55 | -999 |
| 3 | -67.67 | -129.18 | 0.75 | 0.92 | 0.49 | -999 |
| 3 | -67.59 | -128.91 | 0.76 | 0.84 | 0.49 | -999 |
| 3 | -67.50 | -128.66 | 0.91 | 0.93 | 0.48 | -999 |
| 3 | -67.42 | -128.41 | 0.91 | 0.84 | 0.51 | -999 |
| 3 | -67.33 | -128.15 | 0.92 | 0.84 | 0.56 | -999 |
| 3 | -67.19 | -127.75 | 0.97 | 0.93 | 0.52 | -999 |
| 3 | -67.11 | -127.51 | 1.04 | 0.80 | 0.55 | -999 |
| 3 | -67.03 | -127.27 | 1.02 | 0.74 | 0.52 | -999 |
| 3 | -66.94 | -127.05 | 1.05 | 0.91 | 0.53 | -999 |
| 3 | -66.87 | -126.80 | 1.08 | 0.89 | 0.54 | -999 |
| 3 | -66.78 | -126.57 | 1.09 | 0.76 | 0.47 | -999 |
| 3 | -66.70 | -126.32 | 1.34 | 0.95 | 0.46 | -999 |
| 3 | -66.70 | -126.23 | 1.33 | 0.80 | 0.53 | -999 |
| 3 | -67.05 | -126.02 | 1.15 | 1.06 | 0.59 | -999 |
| 3 | -67.21 | -125.68 | 1.17 | 0.99 | 0.41 | -999 |

|   |        |         |      |      |      |      |
|---|--------|---------|------|------|------|------|
| 3 | -67.03 | -125.77 | 1.04 | 0.93 | 0.40 | -999 |
| 3 | -67.00 | -125.80 | 1.13 | 0.91 | 0.40 | -999 |
| 3 | -67.00 | -125.86 | 0.98 | 0.95 | 0.50 | -999 |
| 3 | -66.99 | -125.87 | 1.15 | 0.84 | 0.53 | -999 |
| 3 | -66.93 | -125.69 | 1.23 | 1.07 | 0.55 | -999 |
| 3 | -66.79 | -125.27 | 1.34 | 1.01 | 0.66 | -999 |
| 3 | -66.47 | -124.35 | 1.50 | 0.92 | 0.63 | -999 |
| 3 | -66.59 | -123.98 | 1.50 | 1.01 | 0.66 | -999 |
| 3 | -66.76 | -123.63 | 1.56 | 0.91 | 0.56 | -999 |
| 3 | -66.94 | -123.28 | 1.51 | 0.81 | 0.53 | -999 |
| 3 | -67.10 | -122.92 | 1.47 | 0.96 | 0.65 | -999 |
| 3 | -67.27 | -122.57 | 1.54 | 1.01 | 0.53 | -999 |
| 3 | -67.44 | -122.21 | 1.53 | 1.08 | 0.54 | -999 |
| 3 | -67.60 | -121.85 | 1.58 | 1.10 | 0.60 | -999 |
| 3 | -67.78 | -121.48 | 1.63 | 1.02 | 0.54 | -999 |
| 3 | -67.95 | -121.10 | 1.64 | 1.16 | 0.67 | -999 |
| 3 | -68.14 | -120.81 | 1.62 | 1.17 | 0.67 | -999 |
| 3 | -68.37 | -120.08 | 1.53 | 1.11 | 0.56 | -999 |
| 3 | -68.36 | -119.50 | 1.54 | 1.01 | 0.51 | -999 |
| 3 | -68.35 | -118.92 | 1.59 | 1.06 | 0.57 | -999 |
| 3 | -68.33 | -118.27 | 1.45 | 1.04 | 0.56 | -999 |
| 3 | -68.32 | -117.64 | 1.34 | 0.97 | 0.55 | -999 |
| 3 | -68.31 | -116.99 | 1.42 | 1.04 | 0.48 | -999 |
| 3 | -68.55 | -116.80 | 1.38 | 0.97 | 0.45 | -999 |
| 3 | -68.78 | -116.61 | 1.36 | 1.07 | 0.41 | -999 |
| 3 | -69.01 | -116.42 | 1.34 | 1.15 | 0.49 | -999 |
| 3 | -69.02 | -115.96 | 1.32 | 1.03 | 0.52 | -999 |
| 3 | -68.94 | -115.33 | 1.43 | 1.03 | 0.55 | -999 |
| 3 | -68.86 | -114.70 | 1.35 | 1.11 | 0.59 | -999 |
| 3 | -68.70 | -113.44 | 1.10 | 1.03 | 0.43 | -999 |
| 3 | -68.59 | -112.91 | 1.12 | 0.95 | 0.34 | -999 |
| 3 | -68.39 | -112.59 | 1.24 | 0.90 | 0.40 | -999 |
| 3 | -68.19 | -112.29 | 1.31 | 1.01 | 0.46 | -999 |
| 3 | -68.00 | -111.95 | 1.36 | 1.09 | 0.59 | -999 |
| 3 | -67.94 | -111.33 | 1.25 | 0.97 | 0.56 | -999 |
| 3 | -67.89 | -110.69 | 1.23 | 0.95 | 0.57 | -999 |
| 3 | -67.84 | -110.08 | 1.06 | 0.96 | 0.43 | -999 |
| 3 | -67.78 | -109.45 | 1.17 | 1.03 | 0.53 | -999 |
| 3 | -67.73 | -108.83 | 1.11 | 1.01 | 0.36 | -999 |
| 3 | -67.68 | -108.21 | 0.99 | 0.98 | 0.38 | -999 |
| 3 | -67.63 | -107.60 | 0.96 | 0.85 | 0.41 | -999 |
| 3 | -67.80 | -107.24 | 0.88 | 0.90 | 0.29 | -999 |
| 3 | -68.01 | -106.94 | 0.81 | 0.73 | 0.21 | -999 |
| 3 | -67.91 | -106.44 | 0.81 | 0.80 | 0.28 | -999 |
| 3 | -67.80 | -105.90 | 0.87 | 0.83 | 0.25 | -999 |
| 3 | -68.02 | -105.60 | 0.91 | 0.77 | 0.28 | -999 |
| 3 | -68.23 | -105.26 | 0.92 | 0.73 | 0.28 | -999 |



|   |        |         |      |      |      |      |
|---|--------|---------|------|------|------|------|
| 3 | -68.45 | -104.99 | 0.96 | 0.82 | 0.32 | -999 |
| 3 | -68.62 | -104.65 | 0.95 | 0.83 | 0.29 | -999 |
| 3 | -68.54 | -104.04 | 0.92 | 0.90 | 0.25 | -999 |
| 3 | -68.45 | -103.43 | 0.94 | 0.75 | 0.36 | -999 |
| 3 | -68.37 | -102.84 | 0.95 | 0.73 | 0.31 | -999 |
| 3 | -68.28 | -102.22 | 0.92 | 0.81 | 0.28 | -999 |
| 3 | -68.14 | -101.96 | 0.89 | 0.71 | 0.31 | -999 |
| 3 | -67.91 | -102.22 | 0.88 | 0.67 | 0.27 | -999 |
| 3 | -67.70 | -102.47 | 0.92 | 0.74 | 0.33 | -999 |
| 3 | -67.38 | -102.84 | -999 | -999 | -999 | -999 |
| 3 | -67.15 | -103.09 | 0.92 | 0.74 | 0.31 | -999 |
| 3 | -67.03 | -102.62 | 0.96 | 0.79 | 0.34 | -999 |
| 3 | -66.89 | -102.33 | 0.96 | 0.97 | 0.30 | -999 |
| 3 | -66.68 | -102.61 | 1.00 | 0.83 | 0.37 | -999 |
| 3 | -66.47 | -102.91 | 1.08 | 0.81 | 0.32 | -999 |
| 3 | -66.30 | -102.84 | 1.07 | 0.86 | 0.34 | -999 |
| 3 | -66.18 | -102.38 | 1.03 | 0.70 | 0.39 | -999 |
| 3 | -66.05 | -101.92 | 1.04 | 0.66 | 0.35 | -999 |
| 3 | -65.94 | -101.50 | 1.15 | 0.56 | -999 | -999 |
| 3 | -65.81 | -101.08 | 1.01 | 0.50 | 0.28 | -999 |
| 3 | -65.68 | -100.66 | 1.24 | 0.68 | 0.45 | -999 |
| 3 | -65.55 | -100.25 | 1.12 | 0.53 | 0.28 | -999 |
| 3 | -65.42 | -99.84  | 0.96 | 0.57 | 0.27 | -999 |
| 3 | -65.30 | -99.44  | 0.98 | 0.57 | 0.32 | -999 |
| 3 | -65.17 | -99.03  | 0.92 | 0.82 | 0.32 | -999 |
| 3 | -65.04 | -98.63  | 0.92 | 0.78 | 0.31 | -999 |
| 3 | -64.91 | -98.24  | 0.89 | 0.79 | 0.36 | -999 |
| 3 | -64.79 | -97.84  | 0.98 | 0.68 | 0.38 | -999 |
| 3 | -64.66 | -97.44  | 0.84 | 0.66 | 0.30 | -999 |
| 3 | -64.53 | -97.04  | 0.84 | 0.92 | 0.28 | -999 |
| 3 | -64.40 | -96.64  | 0.73 | 0.62 | 0.25 | -999 |
| 3 | -64.27 | -96.25  | 0.68 | 0.55 | 0.23 | -999 |
| 3 | -64.14 | -95.85  | 0.60 | 0.64 | 0.23 | -999 |
| 3 | -64.01 | -95.46  | 0.56 | 0.58 | 0.30 | -999 |
| 3 | -63.88 | -95.06  | 0.63 | 0.63 | 0.28 | -999 |
| 3 | -63.74 | -94.67  | 0.57 | 0.61 | 0.31 | -999 |
| 3 | -63.63 | -94.42  | 0.66 | 0.74 | 0.30 | -999 |
| 3 | -63.47 | -94.80  | 0.60 | 0.78 | 0.30 | -999 |
| 3 | -63.31 | -95.17  | 0.55 | 0.72 | 0.31 | -999 |
| 3 | -63.14 | -95.55  | 0.57 | 0.79 | 0.34 | -999 |
| 3 | -62.98 | -95.92  | 0.61 | 0.86 | 0.25 | -999 |
| 3 | -62.82 | -96.29  | 0.60 | 0.87 | 0.25 | -999 |
| 3 | -62.66 | -96.65  | 0.55 | 0.77 | 0.31 | -999 |
| 3 | -62.50 | -97.01  | 0.50 | 0.70 | 0.31 | -999 |
| 3 | -62.17 | -97.73  | 0.48 | 0.81 | 0.31 | -999 |
| 3 | -62.01 | -98.09  | 0.45 | 0.81 | 0.29 | -999 |
| 3 | -61.85 | -98.45  | 0.45 | 0.78 | 0.32 | -999 |

|   |        |        |      |      |      |      |
|---|--------|--------|------|------|------|------|
| 3 | -61.68 | -98.81 | 0.60 | 0.92 | 0.38 | -999 |
| 3 | -61.52 | -99.16 | 0.66 | 0.82 | 0.30 | -999 |
| 3 | -61.36 | -99.50 | 0.97 | 0.95 | 0.38 | -999 |
| 3 | -61.21 | -99.84 | 0.98 | 0.95 | 0.45 | -999 |
| 3 | -61.06 | -99.68 | 0.87 | 1.05 | 0.48 | -999 |
| 3 | -60.94 | -99.26 | 0.87 | 0.87 | 0.38 | -999 |
| 3 | -60.81 | -98.82 | 0.91 | 0.92 | 0.46 | -999 |
| 3 | -60.69 | -98.39 | 0.90 | 0.91 | 0.50 | -999 |
| 3 | -60.56 | -97.97 | 0.79 | 0.91 | 0.63 | -999 |
| 3 | -60.44 | -97.56 | 0.75 | 0.96 | 0.57 | -999 |
| 3 | -60.32 | -97.16 | 0.70 | 0.91 | 0.51 | -999 |
| 3 | -60.20 | -96.76 | 0.69 | 0.97 | 0.52 | -999 |
| 3 | -60.28 | -96.38 | 0.62 | 1.02 | 0.52 | -999 |
| 3 | -60.43 | -96.02 | 0.65 | 0.94 | 0.47 | -999 |
| 3 | -60.58 | -95.66 | 0.63 | 0.94 | 0.54 | -999 |
| 3 | -60.73 | -95.30 | 0.67 | 1.02 | 0.52 | -999 |
| 3 | -60.88 | -94.93 | 0.71 | 1.00 | 0.44 | -999 |
| 3 | -61.03 | -94.55 | 0.76 | 1.32 | 0.56 | -999 |
| 3 | -61.19 | -94.16 | 0.77 | 1.06 | 0.43 | -999 |
| 3 | -61.31 | -93.73 | 0.79 | 0.95 | -999 | -999 |
| 3 | -61.43 | -93.28 | 0.82 | 1.04 | 0.48 | -999 |
| 3 | -61.55 | -92.83 | 0.83 | 1.01 | 0.50 | -999 |
| 3 | -61.67 | -92.38 | 0.87 | 0.91 | 0.42 | -999 |
| 3 | -61.76 | -91.94 | 0.94 | 1.21 | 0.39 | -999 |
| 3 | -61.77 | -91.43 | 0.97 | 1.01 | 0.44 | -999 |
| 3 | -61.77 | -90.94 | 0.97 | 1.01 | 0.41 | -999 |
| 3 | -61.82 | -90.47 | 1.00 | 1.08 | 0.42 | -999 |
| 3 | -61.95 | -90.04 | 1.06 | 0.98 | 0.51 | -999 |
| 3 | -62.08 | -89.61 | 1.11 | 0.98 | 0.47 | -999 |
| 3 | -62.21 | -89.17 | 1.13 | 1.04 | 0.42 | -999 |
| 3 | -62.34 | -88.73 | 1.18 | 0.98 | 0.51 | -999 |
| 3 | -62.47 | -88.29 | 1.26 | 0.92 | 0.40 | -999 |
| 3 | -62.60 | -87.82 | 1.14 | 1.03 | 0.42 | -999 |
| 3 | -62.76 | -87.30 | 1.13 | 1.36 | 0.50 | -999 |
| 3 | -62.89 | -86.83 | 1.14 | 0.92 | 0.45 | -999 |
| 3 | -63.03 | -86.36 | 1.06 | 0.93 | 0.45 | -999 |
| 3 | -63.07 | -85.91 | 1.02 | 0.94 | 0.48 | -999 |
| 3 | -62.88 | -85.63 | 1.11 | 1.14 | 0.41 | -999 |
| 3 | -62.70 | -85.38 | 1.04 | 1.37 | 0.55 | -999 |
| 3 | -62.53 | -85.14 | 1.02 | 0.97 | 0.60 | -999 |
| 3 | -62.42 | -84.77 | 1.06 | 0.79 | 0.64 | -999 |
| 3 | -62.29 | -84.38 | 1.02 | 0.91 | 0.97 | -999 |
| 3 | -62.16 | -83.96 | 1.13 | 0.82 | 0.73 | -999 |
| 3 | -62.03 | -83.53 | 0.99 | 0.87 | 0.52 | -999 |
| 3 | -61.89 | -83.10 | 1.25 | 0.72 | 0.45 | -999 |
| 3 | -61.75 | -82.66 | 1.39 | 1.10 | 0.48 | -999 |
| 3 | -61.62 | -82.24 | 1.24 | 1.08 | 0.44 | -999 |

|   |        |        |      |      |      |      |
|---|--------|--------|------|------|------|------|
| 3 | -61.49 | -81.82 | 1.20 | 1.17 | 0.39 | -999 |
| 3 | -61.36 | -81.41 | 1.11 | 1.07 | 0.43 | -999 |
| 3 | -61.22 | -81.00 | 1.27 | 0.59 | 0.43 | -999 |
| 3 | -61.01 | -80.35 | 1.35 | 0.60 | 0.47 | -999 |
| 3 | -60.88 | -79.94 | 1.20 | 0.72 | 0.37 | -999 |
| 3 | -60.74 | -79.53 | 1.44 | -999 | 0.55 | -999 |
| 3 | -60.47 | -78.70 | 1.31 | 0.72 | 0.47 | -999 |
| 3 | -60.33 | -78.28 | 1.32 | 0.71 | 0.35 | -999 |
| 3 | -60.19 | -77.87 | 1.21 | 0.87 | 0.57 | -999 |
| 3 | -60.06 | -77.46 | 1.15 | 0.98 | 0.51 | -999 |
| 3 | -59.92 | -77.05 | 1.21 | 1.10 | 0.44 | -999 |
| 3 | -59.79 | -76.66 | 1.20 | 0.99 | 0.48 | -999 |
| 3 | -59.66 | -76.26 | 1.22 | 0.99 | 0.52 | -999 |
| 3 | -59.52 | -75.86 | 1.39 | 1.19 | 0.50 | -999 |
| 3 | -59.39 | -75.47 | 1.30 | 1.06 | 0.44 | -999 |
| 3 | -59.25 | -75.09 | 1.34 | 1.10 | 0.51 | -999 |
| 3 | -59.13 | -74.71 | 1.31 | 1.10 | 0.50 | -999 |
| 3 | -59.01 | -74.43 | 1.27 | 1.05 | 0.52 | -999 |
| 3 | -58.89 | -74.03 | 1.19 | 1.20 | 0.55 | -999 |
| 3 | -58.75 | -73.63 | 1.11 | 0.93 | 0.42 | -999 |
| 3 | -58.62 | -73.24 | 1.12 | 1.05 | 0.47 | -999 |
| 3 | -58.47 | -72.83 | 0.98 | 1.10 | 0.54 | -999 |
| 3 | -58.33 | -72.42 | 0.68 | 0.81 | 0.25 | -999 |
| 3 | -58.19 | -72.03 | 1.02 | 0.92 | 0.51 | -999 |
| 3 | -58.05 | -71.63 | 1.07 | 0.95 | 0.52 | -999 |
| 3 | -57.91 | -71.25 | 0.83 | 1.06 | 0.51 | -999 |
| 3 | -57.77 | -70.88 | 0.87 | 0.96 | 0.57 | -999 |
| 3 | -57.63 | -70.51 | 0.82 | 1.00 | 0.51 | -999 |
| 3 | -57.48 | -70.14 | 0.79 | 1.01 | 0.55 | -999 |
| 3 | -57.33 | -69.77 | 0.73 | 0.86 | 0.46 | -999 |
| 3 | -57.19 | -69.40 | 0.71 | 0.91 | 0.44 | -999 |
| 3 | -57.04 | -69.03 | 0.74 | 0.88 | 0.44 | -999 |
| 3 | -56.89 | -68.66 | 0.72 | 0.94 | 0.49 | -999 |
| 3 | -56.75 | -68.29 | 0.70 | 1.03 | 0.48 | -999 |
| 3 | -56.60 | -67.92 | 0.77 | 0.94 | 0.49 | -999 |
| 3 | -56.45 | -67.55 | 0.81 | 0.98 | 0.54 | -999 |
| 3 | -56.28 | -67.26 | 0.73 | 1.02 | 0.49 | -999 |
| 3 | -56.12 | -66.95 | 0.92 | 0.99 | 0.54 | -999 |
| 3 | -55.90 | -66.56 | 1.00 | 0.84 | 0.46 | -999 |
| 3 | -55.69 | -66.19 | 1.07 | 1.02 | 0.47 | -999 |
| 3 | -55.48 | -65.82 | 1.11 | 1.07 | 0.55 | -999 |
| 3 | -55.28 | -65.46 | 1.04 | 1.00 | 0.44 | -999 |
| 3 | -54.88 | -64.97 | 1.12 | 1.01 | 0.61 | -999 |
| 3 | -54.70 | -64.96 | 1.15 | 1.00 | 0.54 | -999 |
| 3 | -54.53 | -65.01 | 1.28 | 1.07 | 0.49 | -999 |
| 3 | -54.37 | -65.28 | -999 | -999 | -999 | -999 |
| 3 | -54.20 | -65.58 | 1.06 | 0.99 | 0.56 | -999 |

|   |        |        |      |      |      |      |
|---|--------|--------|------|------|------|------|
| 3 | -54.01 | -65.90 | 1.15 | 0.69 | 0.50 | -999 |
| 3 | -53.62 | -66.57 | 1.14 | 0.75 | 0.48 | -999 |
| 3 | -53.42 | -66.90 | 1.52 | 0.78 | 0.52 | -999 |
| 3 | -53.29 | -67.12 | 1.53 | 0.64 | 0.57 | -999 |
| 3 | -53.16 | -67.33 | 1.50 | 0.56 | 0.53 | -999 |
| 4 | -44.38 | 146.19 | 1.39 | -999 | 0.35 | -999 |
| 4 | -44.37 | 146.22 | 1.31 | -999 | 0.21 | -999 |
| 4 | -44.36 | 146.25 | 1.29 | -999 | 0.25 | -999 |
| 4 | -44.40 | 146.23 | 1.36 | -999 | 0.23 | -999 |
| 4 | -44.72 | 146.05 | 1.73 | -999 | 0.40 | -999 |
| 4 | -44.72 | 146.04 | 1.69 | -999 | 0.51 | -999 |
| 4 | -44.72 | 146.04 | 1.37 | -999 | 0.30 | -999 |
| 4 | -44.72 | 146.04 | 1.43 | -999 | 0.33 | -999 |
| 4 | -44.71 | 145.98 | 1.00 | -999 | 0.24 | -999 |
| 4 | -44.71 | 145.94 | 1.03 | -999 | 0.14 | -999 |
| 4 | -44.70 | 145.71 | -999 | -999 | -999 | -999 |
| 4 | -44.69 | 145.67 | -999 | -999 | -999 | -999 |
| 4 | -44.72 | 145.48 | -999 | -999 | -999 | -999 |
| 4 | -44.73 | 145.44 | 1.77 | -999 | 0.15 | -999 |
| 4 | -44.75 | 145.41 | 2.01 | -999 | 0.12 | -999 |
| 4 | -44.75 | 145.50 | 1.92 | -999 | 0.19 | -999 |
| 4 | -44.73 | 145.55 | 2.03 | -999 | 0.13 | -999 |
| 4 | -44.95 | 145.92 | 1.84 | -999 | 0.18 | -999 |
| 4 | -45.02 | 146.01 | 1.80 | -999 | 0.09 | -999 |
| 4 | -45.21 | 145.91 | 1.73 | -999 | 0.21 | -999 |
| 4 | -45.22 | 145.85 | 1.72 | -999 | 0.20 | -999 |
| 4 | -45.22 | 145.84 | 1.45 | -999 | 0.18 | -999 |
| 4 | -45.22 | 145.83 | 1.57 | -999 | 0.18 | -999 |
| 4 | -45.49 | 145.73 | 1.80 | -999 | 0.21 | -999 |
| 4 | -45.58 | 145.71 | 1.81 | -999 | 0.36 | -999 |
| 4 | -45.70 | 145.66 | 1.75 | -999 | 0.20 | -999 |
| 4 | -45.70 | 145.65 | 1.83 | -999 | 0.24 | -999 |
| 4 | -45.73 | 145.66 | 1.45 | -999 | 0.28 | -999 |
| 4 | -45.74 | 145.67 | 1.36 | -999 | 0.30 | -999 |
| 4 | -45.75 | 145.67 | 1.38 | -999 | 0.25 | -999 |
| 4 | -45.77 | 145.67 | -999 | -999 | 0.16 | -999 |
| 4 | -46.14 | 145.61 | -999 | -999 | 0.24 | -999 |
| 4 | -46.16 | 145.50 | 1.76 | -999 | 0.16 | -999 |
| 4 | -46.18 | 145.46 | 1.90 | -999 | 0.13 | -999 |
| 4 | -46.18 | 145.46 | 2.02 | -999 | 0.15 | -999 |
| 4 | -46.46 | 145.34 | 2.05 | -999 | 0.12 | -999 |
| 4 | -46.53 | 145.31 | 2.24 | -999 | 0.01 | -999 |
| 4 | -46.64 | 145.26 | 2.41 | -999 | 0.15 | -999 |
| 4 | -46.64 | 145.26 | 2.73 | -999 | 0.08 | -999 |
| 4 | -46.65 | 145.25 | 3.03 | -999 | 0.14 | -999 |
| 4 | -46.65 | 145.25 | 2.90 | -999 | 0.07 | -999 |
| 4 | -46.70 | 145.22 | -999 | -999 | 0.17 | -999 |

|   |        |        |      |      |      |      |
|---|--------|--------|------|------|------|------|
| 4 | -46.76 | 145.18 | 2.24 | -999 | 0.09 | -999 |
| 4 | -47.15 | 144.91 | 1.63 | -999 | 0.21 | -999 |
| 4 | -47.15 | 144.90 | 1.68 | -999 | 0.12 | -999 |
| 4 | -47.14 | 144.89 | 1.71 | -999 | 0.21 | -999 |
| 4 | -47.14 | 144.89 | 1.71 | -999 | 0.20 | -999 |
| 4 | -47.13 | 144.89 | 0.99 | -999 | 0.05 | -999 |
| 4 | -47.12 | 144.89 | 1.12 | -999 | -999 | -999 |
| 4 | -47.09 | 144.51 | -999 | -999 | 0.38 | -999 |
| 4 | -47.09 | 144.40 | 2.36 | -999 | 0.46 | -999 |
| 4 | -47.04 | 143.77 | 2.02 | -999 | 0.46 | -999 |
| 4 | -47.03 | 143.63 | 1.96 | -999 | 0.34 | -999 |
| 4 | -46.99 | 142.94 | 1.04 | -999 | 0.31 | -999 |
| 4 | -46.98 | 142.81 | 1.24 | -999 | 0.18 | -999 |
| 4 | -46.92 | 142.10 | 2.28 | -999 | 0.79 | -999 |
| 4 | -46.91 | 142.05 | 1.28 | -999 | 0.78 | -999 |
| 4 | -46.92 | 142.06 | 2.27 | -999 | 0.36 | -999 |
| 4 | -46.92 | 142.03 | 2.11 | -999 | 0.40 | -999 |
| 4 | -46.91 | 142.01 | -999 | -999 | 0.46 | -999 |
| 4 | -46.95 | 142.07 | 1.30 | -999 | 0.42 | -999 |
| 4 | -46.94 | 142.07 | 1.36 | -999 | 0.36 | -999 |
| 4 | -46.91 | 142.04 | 1.43 | -999 | 0.44 | -999 |
| 4 | -46.90 | 142.03 | 1.34 | -999 | 0.37 | -999 |
| 4 | -46.91 | 142.00 | 1.25 | -999 | 0.36 | -999 |
| 4 | -46.92 | 141.99 | 1.33 | -999 | 0.44 | -999 |
| 4 | -46.93 | 142.00 | 1.50 | -999 | 0.35 | -999 |
| 4 | -46.92 | 141.99 | 1.52 | -999 | 0.37 | -999 |
| 4 | -46.90 | 141.97 | -999 | -999 | 0.34 | -999 |
| 4 | -46.91 | 141.97 | 1.53 | -999 | 0.30 | -999 |
| 4 | -46.91 | 141.97 | 1.35 | -999 | 0.39 | -999 |
| 4 | -46.91 | 141.97 | 1.53 | -999 | 0.30 | -999 |
| 4 | -46.90 | 141.97 | 1.56 | -999 | 0.41 | -999 |
| 4 | -46.90 | 141.95 | 1.74 | -999 | 0.43 | -999 |
| 4 | -46.91 | 141.95 | 1.77 | -999 | 0.49 | -999 |
| 4 | -46.82 | 142.07 | -999 | -999 | 0.48 | -999 |
| 4 | -46.82 | 142.07 | 1.85 | -999 | 0.45 | -999 |
| 4 | -46.79 | 142.05 | 1.45 | -999 | 0.51 | -999 |
| 4 | -46.78 | 142.04 | 1.68 | -999 | 0.61 | -999 |
| 4 | -46.81 | 141.99 | 1.63 | -999 | 0.83 | -999 |
| 4 | -46.81 | 141.98 | 1.68 | -999 | 0.87 | -999 |
| 4 | -46.81 | 141.81 | 1.46 | -999 | 0.88 | -999 |
| 4 | -46.80 | 141.77 | 1.51 | -999 | 0.99 | -999 |
| 4 | -46.79 | 141.58 | -999 | -999 | 0.84 | -999 |
| 4 | -46.79 | 141.54 | 1.44 | -999 | 0.82 | -999 |
| 4 | -46.77 | 141.36 | 1.50 | -999 | 0.87 | -999 |
| 4 | -46.76 | 141.33 | 1.62 | -999 | 0.78 | -999 |
| 4 | -46.71 | 141.15 | 1.89 | -999 | 0.28 | -999 |
| 4 | -46.70 | 141.11 | 1.76 | -999 | 0.24 | -999 |

|   |        |        |      |      |      |      |
|---|--------|--------|------|------|------|------|
| 4 | -46.78 | 141.46 | 1.63 | -999 | 0.26 | -999 |
| 4 | -46.81 | 141.60 | 1.67 | -999 | 0.34 | -999 |
| 4 | -46.91 | 142.04 | -999 | -999 | 0.19 | -999 |
| 4 | -46.91 | 142.04 | 1.38 | -999 | 0.24 | -999 |
| 4 | -46.91 | 142.03 | 1.11 | -999 | 0.20 | -999 |
| 4 | -46.91 | 142.03 | 1.18 | -999 | 0.17 | -999 |
| 4 | -46.90 | 142.02 | 1.37 | -999 | 0.23 | -999 |
| 4 | -46.89 | 142.02 | 1.42 | -999 | 0.21 | -999 |
| 4 | -46.88 | 142.01 | 1.61 | -999 | 0.19 | -999 |
| 4 | -46.88 | 142.00 | 1.62 | -999 | 0.13 | -999 |
| 4 | -46.87 | 142.01 | 1.38 | -999 | 0.09 | -999 |
| 4 | -46.87 | 142.01 | 1.37 | -999 | 0.09 | -999 |
| 4 | -46.87 | 141.97 | -999 | -999 | 0.14 | -999 |
| 4 | -46.87 | 141.97 | 1.43 | -999 | 0.08 | -999 |
| 4 | -47.01 | 142.59 | 1.50 | -999 | 0.14 | -999 |
| 4 | -47.04 | 142.72 | 1.50 | -999 | 0.11 | -999 |
| 4 | -47.19 | 143.44 | 1.58 | -999 | 0.14 | -999 |
| 4 | -47.22 | 143.57 | 1.62 | -999 | 0.04 | -999 |
| 4 | -47.35 | 144.27 | 1.57 | -999 | 0.15 | -999 |
| 4 | -47.38 | 144.42 | 1.49 | -999 | 0.15 | -999 |
| 4 | -47.47 | 144.90 | 2.26 | -999 | 0.18 | -999 |
| 4 | -47.47 | 144.90 | 2.80 | -999 | 0.15 | -999 |
| 4 | -47.44 | 144.89 | -999 | -999 | 0.15 | -999 |
| 4 | -47.44 | 144.89 | 2.05 | -999 | 0.13 | -999 |
| 4 | -47.55 | 144.83 | 1.29 | -999 | 0.16 | -999 |
| 4 | -47.63 | 144.80 | 1.28 | -999 | 0.15 | -999 |
| 4 | -48.00 | 144.67 | 1.46 | -999 | 0.10 | -999 |
| 4 | -48.00 | 144.66 | 1.51 | -999 | 0.10 | -999 |
| 4 | -48.00 | 144.65 | -999 | -999 | 0.07 | -999 |
| 4 | -48.00 | 144.64 | 1.92 | -999 | 0.12 | -999 |
| 4 | -48.32 | 144.53 | 1.86 | -999 | 0.14 | -999 |
| 4 | -48.32 | 144.52 | 1.74 | -999 | 0.03 | -999 |
| 4 | -48.32 | 144.53 | 1.68 | -999 | 0.12 | -999 |
| 4 | -48.33 | 144.53 | 1.83 | -999 | 0.09 | -999 |
| 4 | -48.33 | 144.55 | 1.59 | -999 | 0.12 | -999 |
| 4 | -48.40 | 144.51 | 1.45 | -999 | 0.09 | -999 |
| 4 | -48.78 | 144.32 | -999 | -999 | 0.09 | -999 |
| 4 | -48.79 | 144.33 | 1.46 | -999 | 0.16 | -999 |
| 4 | -48.79 | 144.35 | 1.26 | -999 | 0.13 | -999 |
| 4 | -48.78 | 144.42 | 1.21 | -999 | 0.15 | -999 |
| 4 | -48.79 | 144.43 | 1.15 | -999 | 0.19 | -999 |
| 4 | -48.79 | 144.44 | 1.08 | -999 | 0.14 | -999 |
| 4 | -48.79 | 144.45 | 1.21 | -999 | 0.11 | -999 |
| 4 | -48.80 | 144.50 | 1.08 | -999 | 0.18 | -999 |
| 4 | -48.80 | 144.51 | 1.02 | -999 | 0.20 | -999 |
| 4 | -48.82 | 144.53 | -999 | -999 | 0.25 | -999 |
| 4 | -48.83 | 144.54 | 1.06 | -999 | 0.15 | -999 |

|   |        |        |      |      |      |      |
|---|--------|--------|------|------|------|------|
| 4 | -49.11 | 144.26 | 1.09 | -999 | 0.20 | -999 |
| 4 | -49.25 | 144.12 | 1.11 | -999 | 0.16 | -999 |
| 4 | -49.27 | 144.12 | 1.41 | -999 | 0.27 | -999 |
| 4 | -49.27 | 144.12 | 1.41 | -999 | 0.29 | -999 |
| 4 | -49.35 | 144.07 | 1.26 | -999 | 0.28 | -999 |
| 4 | -49.51 | 143.98 | 1.29 | -999 | 0.31 | -999 |
| 4 | -49.61 | 143.94 | 1.12 | -999 | 0.28 | -999 |
| 4 | -49.61 | 143.94 | 1.02 | -999 | 0.14 | -999 |
| 4 | -49.61 | 143.95 | -999 | -999 | 0.31 | -999 |
| 4 | -49.61 | 143.95 | 1.19 | -999 | 0.33 | -999 |
| 4 | -49.89 | 143.81 | 1.18 | -999 | 0.40 | -999 |
| 4 | -49.89 | 143.82 | 1.23 | -999 | 0.40 | -999 |
| 4 | -49.90 | 143.85 | 1.27 | -999 | 0.34 | -999 |
| 4 | -50.00 | 143.79 | 1.26 | -999 | 0.31 | -999 |
| 4 | -50.16 | 143.67 | 1.20 | -999 | 0.30 | -999 |
| 4 | -50.16 | 143.66 | 1.32 | -999 | 0.34 | -999 |
| 4 | -50.21 | 143.61 | -999 | -999 | 0.33 | -999 |
| 4 | -50.23 | 143.57 | 1.61 | -999 | 0.29 | -999 |
| 4 | -50.28 | 143.45 | 1.59 | -999 | 0.21 | -999 |
| 4 | -50.29 | 143.39 | 1.67 | -999 | 0.24 | -999 |
| 4 | -50.34 | 143.27 | 1.67 | -999 | 0.23 | -999 |
| 4 | -50.35 | 143.22 | 1.71 | -999 | 0.31 | -999 |
| 4 | -50.35 | 143.12 | -999 | -999 | 0.44 | -999 |
| 4 | -50.34 | 143.11 | 1.69 | -999 | 0.46 | -999 |
| 4 | -50.40 | 143.53 | 1.59 | -999 | 0.43 | -999 |
| 4 | -50.40 | 143.53 | 1.57 | -999 | 0.26 | -999 |
| 4 | -50.41 | 143.45 | 1.38 | -999 | 0.24 | -999 |
| 4 | -50.41 | 143.45 | 1.42 | -999 | 0.31 | -999 |
| 4 | -50.41 | 143.44 | 1.34 | -999 | 0.29 | -999 |
| 4 | -50.42 | 143.43 | 1.40 | -999 | 0.29 | -999 |
| 4 | -50.65 | 143.45 | 1.49 | -999 | 0.23 | -999 |
| 4 | -50.67 | 143.42 | 1.59 | -999 | 0.21 | -999 |
| 4 | -50.67 | 143.41 | -999 | -999 | 0.28 | -999 |
| 4 | -50.72 | 143.32 | 1.70 | -999 | 0.19 | -999 |
| 4 | -50.92 | 143.15 | 1.67 | -999 | 0.11 | -999 |
| 4 | -51.00 | 143.27 | 1.78 | -999 | 0.27 | -999 |
| 4 | -51.01 | 143.29 | 1.81 | -999 | 0.13 | -999 |
| 4 | -51.01 | 143.30 | 1.94 | -999 | 0.19 | -999 |
| 4 | -51.01 | 143.31 | 1.86 | -999 | 0.18 | -999 |
| 4 | -51.02 | 143.30 | 1.91 | -999 | 0.14 | -999 |
| 4 | -51.03 | 143.32 | -999 | -999 | 0.24 | -999 |
| 4 | -51.04 | 143.33 | 1.44 | -999 | 0.16 | -999 |
| 4 | -51.03 | 143.36 | 1.40 | -999 | 0.22 | -999 |
| 4 | -51.03 | 143.37 | 1.55 | -999 | 0.18 | -999 |
| 4 | -51.01 | 143.41 | -999 | -999 | 0.21 | -999 |
| 4 | -51.01 | 143.42 | 1.53 | -999 | 0.25 | -999 |
| 4 | -51.01 | 143.44 | 1.53 | -999 | 0.20 | -999 |

|   |        |        |      |      |      |      |
|---|--------|--------|------|------|------|------|
| 4 | -51.02 | 143.45 | 1.46 | -999 | 0.19 | -999 |
| 4 | -51.23 | 143.16 | 1.46 | -999 | 0.13 | -999 |
| 4 | -51.26 | 143.13 | 1.46 | -999 | 0.17 | -999 |
| 4 | -51.25 | 143.15 | -999 | -999 | 0.24 | -999 |
| 4 | -51.31 | 143.12 | 1.31 | -999 | 0.11 | -999 |
| 4 | -51.53 | 143.00 | 1.23 | -999 | 0.13 | -999 |
| 4 | -51.53 | 143.01 | 1.28 | -999 | 0.20 | -999 |
| 4 | -51.52 | 143.02 | 1.28 | -999 | 0.17 | -999 |
| 4 | -51.69 | 142.91 | 1.31 | -999 | 0.23 | -999 |
| 4 | -51.81 | 142.84 | 1.44 | -999 | 0.33 | -999 |
| 4 | -51.80 | 142.84 | 1.44 | -999 | 0.32 | -999 |
| 4 | -51.80 | 142.85 | -999 | -999 | 0.36 | -999 |
| 4 | -51.80 | 142.84 | 1.53 | -999 | 0.28 | -999 |
| 4 | -51.90 | 142.79 | 1.35 | 2.13 | 0.29 | -999 |
| 4 | -52.07 | 142.71 | 1.29 | 2.17 | 0.33 | -999 |
| 4 | -52.08 | 142.70 | 1.11 | 2.15 | 0.28 | -999 |
| 4 | -52.08 | 142.71 | 1.05 | 2.07 | 0.35 | -999 |
| 4 | -52.26 | 142.60 | 0.90 | 1.88 | 0.25 | -999 |
| 4 | -52.37 | 142.53 | 0.97 | 1.87 | 0.35 | -999 |
| 4 | -52.37 | 142.53 | 1.10 | -999 | 0.41 | -999 |
| 4 | -52.37 | 142.53 | 0.95 | 2.31 | 0.33 | -999 |
| 4 | -52.58 | 142.44 | 0.90 | 2.00 | 0.38 | -999 |
| 4 | -52.67 | 142.40 | 0.94 | 1.97 | 0.42 | -999 |
| 4 | -52.67 | 142.42 | 0.98 | 1.92 | 0.46 | -999 |
| 4 | -52.67 | 142.44 | 0.97 | 2.15 | 0.41 | -999 |
| 4 | -52.66 | 142.41 | 0.93 | 2.26 | 0.38 | -999 |
| 4 | -52.70 | 142.39 | 1.05 | 2.23 | 0.37 | -999 |
| 4 | -53.04 | 142.20 | 1.19 | -999 | 0.51 | -999 |
| 4 | -53.13 | 142.15 | 1.06 | 1.81 | 0.41 | -999 |
| 4 | -53.13 | 142.15 | 1.09 | 1.59 | 0.38 | -999 |
| 4 | -53.13 | 142.15 | 1.07 | 1.95 | 0.39 | -999 |
| 4 | -53.42 | 141.96 | 0.91 | 1.95 | 0.42 | -999 |
| 4 | -53.43 | 141.96 | 1.03 | 1.98 | 0.42 | -999 |
| 4 | -53.43 | 141.95 | 0.87 | 1.52 | 0.34 | -999 |
| 4 | -53.52 | 142.11 | 1.04 | 1.76 | 0.28 | -999 |
| 4 | -53.65 | 142.29 | 1.04 | 1.66 | 0.24 | -999 |
| 4 | -53.66 | 142.22 | 1.13 | 1.97 | 0.26 | -999 |
| 4 | -53.67 | 142.05 | 1.07 | 1.84 | 0.25 | -999 |
| 4 | -53.67 | 141.97 | 1.20 | 1.99 | 0.24 | -999 |
| 4 | -53.67 | 141.80 | -999 | -999 | 0.26 | -999 |
| 4 | -53.67 | 141.71 | 1.44 | 2.12 | 0.25 | -999 |
| 4 | -53.66 | 141.51 | 1.39 | 1.76 | 0.18 | -999 |
| 4 | -53.65 | 141.41 | 1.42 | 1.78 | 0.17 | -999 |
| 4 | -53.65 | 141.19 | 1.33 | 1.69 | 0.11 | -999 |
| 4 | -53.67 | 141.34 | 1.45 | 1.70 | 0.19 | -999 |
| 4 | -53.75 | 141.76 | 1.78 | 2.08 | 0.12 | -999 |
| 4 | -53.74 | 141.76 | 1.45 | 2.12 | 0.18 | -999 |



|   |        |        |      |      |      |      |
|---|--------|--------|------|------|------|------|
| 4 | -53.74 | 141.76 | 1.55 | 1.87 | 0.19 | -999 |
| 4 | -53.75 | 141.79 | 1.24 | 1.45 | 0.09 | -999 |
| 4 | -53.74 | 141.81 | 1.15 | 1.62 | 0.16 | -999 |
| 4 | -53.73 | 141.85 | 1.03 | 1.94 | 0.19 | -999 |
| 4 | -53.74 | 141.85 | 1.04 | 1.70 | 0.14 | -999 |
| 4 | -53.74 | 141.85 | 0.93 | 1.34 | 0.13 | -999 |
| 4 | -53.74 | 141.85 | 1.03 | 1.44 | 0.29 | -999 |
| 4 | -53.74 | 141.86 | -999 | -999 | 0.38 | -999 |
| 4 | -53.74 | 141.87 | 1.12 | 1.32 | 0.28 | -999 |
| 4 | -53.74 | 141.88 | 1.03 | 1.07 | 0.27 | -999 |
| 4 | -53.74 | 141.88 | 1.12 | -999 | 0.24 | -999 |
| 4 | -53.73 | 141.90 | 1.07 | 1.67 | 0.17 | -999 |
| 4 | -53.73 | 141.90 | 1.07 | 1.93 | 0.24 | -999 |
| 4 | -53.74 | 141.81 | 1.04 | 1.89 | 0.29 | -999 |
| 4 | -53.74 | 141.81 | 1.07 | 1.76 | 0.28 | -999 |
| 4 | -53.74 | 141.76 | -999 | 1.52 | 0.31 | -999 |
| 4 | -53.74 | 141.76 | -999 | -999 | -999 | -999 |
| 4 | -53.78 | 141.89 | 1.07 | 0.98 | 0.34 | -999 |
| 4 | -53.78 | 141.89 | 1.07 | 1.08 | 0.44 | -999 |
| 4 | -53.77 | 141.89 | 1.12 | 1.03 | 0.43 | -999 |
| 4 | -53.77 | 141.90 | 1.13 | 1.17 | 0.43 | -999 |
| 4 | -53.78 | 141.91 | 1.09 | 1.20 | 0.52 | -999 |
| 4 | -53.78 | 141.92 | 1.11 | 1.32 | 0.49 | -999 |
| 4 | -53.78 | 141.93 | 1.07 | 1.33 | 0.56 | -999 |
| 4 | -53.79 | 141.94 | 1.04 | 1.37 | 0.46 | -999 |
| 4 | -53.78 | 141.95 | 1.00 | 1.23 | 0.47 | -999 |
| 4 | -53.78 | 141.95 | 1.16 | 1.36 | 0.53 | -999 |
| 4 | -53.78 | 141.95 | 1.16 | 1.32 | 0.45 | -999 |
| 4 | -53.78 | 141.95 | 1.14 | 1.35 | 0.44 | -999 |
| 4 | -53.78 | 141.94 | -999 | -999 | 0.38 | -999 |
| 4 | -53.77 | 141.94 | 1.22 | 1.23 | 0.20 | -999 |
| 4 | -53.77 | 141.94 | 1.22 | 1.13 | 0.22 | -999 |
| 4 | -53.82 | 141.87 | 1.24 | 1.20 | 0.28 | -999 |
| 4 | -54.02 | 141.65 | 1.33 | 1.15 | 0.19 | -999 |
| 4 | -54.07 | 141.60 | 1.35 | 1.17 | 0.14 | -999 |
| 4 | -54.07 | 141.60 | 1.49 | 1.28 | 0.23 | -999 |
| 4 | -54.07 | 141.61 | 1.52 | 1.30 | 0.14 | -999 |
| 4 | -54.06 | 141.61 | 1.39 | 1.46 | 0.17 | -999 |
| 4 | -54.06 | 141.61 | 1.34 | 1.51 | 0.20 | -999 |
| 4 | -54.09 | 141.59 | 1.28 | 1.65 | 0.18 | -999 |
| 4 | -54.18 | 141.54 | 1.22 | 1.70 | 0.19 | -999 |
| 4 | -54.43 | 141.39 | 1.23 | 1.66 | 0.22 | -999 |
| 4 | -54.50 | 141.35 | 1.22 | 1.71 | 0.18 | -999 |
| 4 | -54.53 | 141.34 | 1.37 | 1.65 | 0.18 | -999 |
| 4 | -54.53 | 141.34 | 1.39 | 1.66 | 0.14 | -999 |
| 4 | -54.53 | 141.35 | -999 | -999 | 0.20 | -999 |
| 4 | -54.53 | 141.35 | 1.47 | 1.71 | 0.22 | -999 |

|   |        |        |      |      |      |      |
|---|--------|--------|------|------|------|------|
| 4 | -54.54 | 141.35 | 1.41 | 1.50 | 0.21 | -999 |
| 4 | -54.54 | 141.35 | 1.41 | 1.38 | 0.22 | -999 |
| 4 | -54.54 | 141.35 | 1.28 | 1.38 | 0.17 | -999 |
| 4 | -54.61 | 141.30 | 1.25 | 1.43 | 0.17 | -999 |
| 4 | -54.69 | 141.25 | 1.14 | 1.29 | 0.33 | -999 |
| 4 | -54.76 | 141.20 | 1.08 | 1.42 | 0.33 | -999 |
| 4 | -54.96 | 141.06 | 1.15 | 1.48 | 0.23 | -999 |
| 4 | -55.02 | 141.02 | 1.17 | 1.39 | 0.29 | -999 |
| 4 | -55.02 | 141.03 | 1.17 | 1.27 | 0.15 | -999 |
| 4 | -55.01 | 141.02 | 1.21 | 1.28 | 0.20 | -999 |
| 4 | -55.01 | 141.03 | 1.16 | 1.24 | 0.15 | -999 |
| 4 | -55.04 | 140.98 | 1.25 | 1.34 | 0.16 | -999 |
| 4 | -55.23 | 140.65 | 1.25 | 1.39 | 0.11 | -999 |
| 4 | -55.34 | 140.50 | 1.33 | 1.42 | 0.15 | -999 |
| 4 | -55.49 | 140.73 | -999 | -999 | 0.17 | -999 |
| 4 | -55.48 | 140.73 | 1.56 | 1.41 | 0.23 | -999 |
| 4 | -55.48 | 140.73 | 1.49 | 1.16 | 0.09 | -999 |
| 4 | -55.47 | 140.73 | 1.48 | 1.12 | 0.10 | -999 |
| 4 | -55.56 | 140.68 | 1.37 | 1.09 | 0.13 | -999 |
| 4 | -55.72 | 140.56 | 1.20 | 1.20 | 0.10 | -999 |
| 4 | -55.92 | 140.41 | 1.21 | 1.20 | 0.11 | -999 |
| 4 | -55.92 | 140.42 | 1.20 | 1.17 | 0.15 | -999 |
| 4 | -55.91 | 140.42 | -999 | 1.41 | 0.22 | -999 |
| 4 | -56.00 | 140.36 | 1.13 | 1.24 | 0.11 | -999 |
| 4 | -56.34 | 140.16 | 1.05 | 1.10 | 0.16 | -999 |
| 4 | -56.43 | 140.10 | 1.00 | 1.13 | 0.16 | -999 |
| 4 | -56.42 | 140.11 | 1.00 | 1.04 | 0.23 | -999 |
| 4 | -56.41 | 140.11 | 1.03 | 1.11 | 0.20 | -999 |
| 4 | -56.76 | 139.97 | 1.04 | 0.98 | 0.24 | -999 |
| 4 | -56.93 | 139.90 | 1.08 | 1.12 | 0.19 | -999 |
| 4 | -56.94 | 139.85 | 1.18 | 1.29 | 0.25 | -999 |
| 4 | -56.93 | 139.86 | 1.22 | 1.35 | 0.33 | -999 |
| 4 | -56.92 | 139.85 | -999 | -999 | 0.26 | -999 |
| 4 | -56.92 | 139.88 | 1.28 | 1.20 | 0.16 | -999 |
| 4 | -56.91 | 139.89 | 1.18 | 1.02 | 0.14 | -999 |
| 4 | -56.90 | 139.91 | 1.29 | 1.06 | 0.12 | -999 |
| 4 | -56.89 | 139.92 | 1.20 | 0.98 | 0.08 | -999 |
| 4 | -56.89 | 139.93 | 1.33 | 1.08 | 0.06 | -999 |
| 4 | -56.88 | 139.93 | 1.30 | 1.18 | 0.05 | -999 |
| 4 | -56.94 | 139.86 | 1.28 | 1.14 | 0.06 | -999 |
| 4 | -57.06 | 139.65 | -999 | 1.04 | 0.12 | -999 |
| 4 | -57.15 | 139.90 | 1.29 | 1.05 | 0.06 | -999 |
| 4 | -57.23 | 140.26 | 1.16 | 0.77 | 0.11 | -999 |
| 4 | -57.26 | 140.20 | 1.41 | 0.87 | 0.11 | -999 |
| 4 | -57.31 | 140.05 | 1.37 | 1.07 | 0.09 | -999 |
| 4 | -57.33 | 139.97 | 1.44 | 1.05 | 0.14 | -999 |
| 4 | -57.39 | 139.81 | 1.38 | 0.99 | 0.11 | -999 |

|   |        |        |      |      |      |      |
|---|--------|--------|------|------|------|------|
| 4 | -57.42 | 139.72 | 1.40 | 1.20 | 0.09 | -999 |
| 4 | -57.41 | 139.71 | 1.14 | 1.13 | 0.09 | -999 |
| 4 | -57.36 | 139.85 | 1.18 | 1.19 | 0.06 | -999 |
| 4 | -57.50 | 139.53 | -999 | 1.24 | 0.15 | -999 |
| 4 | -57.57 | 139.36 | 1.16 | 0.87 | 0.17 | -999 |
| 4 | -57.74 | 139.54 | 0.99 | 0.77 | 0.10 | -999 |
| 4 | -57.83 | 139.80 | 1.04 | 0.75 | 0.10 | -999 |
| 4 | -57.85 | 139.86 | 0.97 | 0.72 | 0.12 | -999 |
| 4 | -57.86 | 139.86 | 0.98 | 0.84 | 0.12 | -999 |
| 4 | -57.85 | 139.85 | -999 | 1.11 | 0.33 | -999 |
| 4 | -57.85 | 139.84 | 1.14 | 1.11 | 0.37 | -999 |
| 4 | -57.88 | 139.81 | 0.96 | 0.93 | 0.34 | -999 |
| 4 | -58.03 | 139.84 | 0.96 | 0.92 | 0.29 | -999 |
| 4 | -58.27 | 139.81 | 0.88 | 0.95 | 0.19 | -999 |
| 4 | -58.31 | 139.75 | 0.96 | 1.00 | 0.22 | -999 |
| 4 | -58.40 | 139.61 | 1.00 | 1.01 | 0.20 | -999 |
| 4 | -58.45 | 139.54 | 0.96 | 0.98 | 0.21 | -999 |
| 4 | -58.54 | 139.39 | 1.01 | 0.98 | 0.19 | -999 |
| 4 | -58.59 | 139.32 | 1.06 | 0.93 | 0.20 | -999 |
| 4 | -58.67 | 139.29 | -999 | 0.99 | 0.26 | -999 |
| 4 | -58.76 | 139.60 | 1.06 | 0.85 | 0.20 | -999 |
| 4 | -58.76 | 140.08 | 1.10 | 0.80 | 0.26 | -999 |
| 4 | -58.84 | 139.89 | 1.17 | 0.93 | 0.25 | -999 |
| 4 | -58.85 | 139.85 | 1.14 | 0.89 | 0.20 | -999 |
| 4 | -58.85 | 139.85 | 1.33 | 1.05 | 0.14 | -999 |
| 4 | -58.84 | 139.83 | 1.17 | 0.94 | 0.11 | -999 |
| 4 | -58.84 | 139.83 | 1.11 | 0.96 | 0.06 | -999 |
| 4 | -59.09 | 139.87 | 1.19 | 1.19 | 0.22 | -999 |
| 4 | -59.26 | 139.87 | 1.18 | 1.09 | 0.22 | -999 |
| 4 | -59.35 | 139.85 | 0.95 | 0.55 | 0.12 | -999 |
| 4 | -59.35 | 139.86 | 0.91 | 0.61 | 0.21 | -999 |
| 4 | -59.51 | 139.85 | 0.86 | 0.68 | 0.12 | -999 |
| 4 | -59.70 | 139.85 | 0.94 | 0.71 | 0.08 | -999 |
| 4 | -59.84 | 139.85 | 0.89 | 0.83 | 0.16 | -999 |
| 4 | -59.84 | 139.84 | 0.99 | 0.88 | 0.14 | -999 |
| 4 | -59.82 | 139.84 | 1.11 | -999 | 0.15 | -999 |
| 4 | -59.82 | 139.85 | 1.00 | 1.01 | 0.09 | -999 |
| 4 | -60.13 | 139.82 | 1.03 | 1.09 | 0.10 | -999 |
| 4 | -60.30 | 139.84 | 1.20 | 1.15 | 0.15 | -999 |
| 4 | -60.34 | 139.84 | 1.10 | 1.22 | 0.12 | -999 |
| 4 | -60.34 | 139.85 | 1.07 | 1.38 | 0.11 | -999 |
| 4 | -60.33 | 139.85 | 0.87 | 1.52 | 0.16 | -999 |
| 4 | -60.37 | 139.83 | 0.99 | 2.00 | 0.19 | -999 |
| 4 | -60.55 | 139.41 | 1.04 | 2.43 | 0.09 | -999 |
| 4 | -60.65 | 139.53 | 1.20 | 2.32 | 0.09 | -999 |
| 4 | -60.75 | 139.96 | -999 | -999 | 0.15 | -999 |
| 4 | -60.75 | 139.94 | 0.92 | 1.54 | 0.17 | -999 |

|   |        |        |      |      |      |      |
|---|--------|--------|------|------|------|------|
| 4 | -60.74 | 139.89 | 0.83 | 1.37 | 0.10 | -999 |
| 4 | -60.74 | 139.88 | 0.88 | 1.34 | 0.12 | -999 |
| 4 | -60.73 | 139.89 | 0.96 | 1.60 | 0.16 | -999 |
| 4 | -60.74 | 139.79 | 1.07 | 1.60 | 0.14 | -999 |
| 4 | -60.77 | 139.57 | 1.05 | 1.46 | 0.17 | -999 |
| 4 | -60.78 | 139.46 | 1.01 | 1.59 | 0.23 | -999 |
| 4 | -60.77 | 139.22 | -999 | 1.85 | 0.27 | -999 |
| 4 | -60.75 | 139.12 | 1.00 | 1.71 | 0.23 | -999 |
| 4 | -60.72 | 138.95 | 1.02 | 1.69 | 0.21 | -999 |
| 4 | -60.70 | 138.88 | 1.07 | 1.68 | 0.22 | -999 |
| 4 | -60.67 | 138.74 | 1.12 | 1.70 | 0.25 | -999 |
| 4 | -60.65 | 138.67 | 1.21 | 1.79 | 0.27 | -999 |
| 4 | -60.68 | 138.93 | 1.10 | 1.79 | 0.17 | -999 |
| 4 | -60.74 | 139.28 | 1.10 | 1.65 | 0.20 | -999 |
| 4 | -60.85 | 139.86 | -999 | -999 | 0.38 | -999 |
| 4 | -60.85 | 139.86 | 0.95 | 1.32 | 0.22 | -999 |
| 4 | -60.85 | 139.87 | 0.91 | 1.30 | 0.22 | -999 |
| 4 | -60.84 | 139.87 | 1.07 | 1.43 | 0.30 | -999 |
| 4 | -60.84 | 139.87 | 0.94 | 1.42 | 0.23 | -999 |
| 4 | -60.84 | 139.87 | 0.98 | 1.38 | 0.25 | -999 |
| 4 | -60.83 | 139.89 | 0.91 | 1.32 | 0.11 | -999 |
| 4 | -60.82 | 139.91 | 1.02 | 1.43 | 0.26 | -999 |
| 4 | -60.82 | 139.93 | 0.93 | 1.42 | 0.14 | -999 |
| 4 | -60.82 | 139.94 | 1.02 | 1.40 | 0.14 | -999 |
| 4 | -60.82 | 139.94 | 0.86 | 1.17 | 0.18 | -999 |
| 4 | -60.81 | 139.94 | 0.93 | 1.22 | 0.16 | -999 |
| 4 | -60.81 | 139.93 | 0.88 | 1.18 | 0.21 | -999 |
| 4 | -60.80 | 139.94 | 0.98 | 1.24 | 0.13 | -999 |
| 4 | -60.80 | 139.95 | 0.98 | 1.48 | 0.23 | -999 |
| 4 | -60.80 | 139.95 | 1.12 | 1.61 | 0.27 | -999 |
| 4 | -60.79 | 139.95 | 1.03 | 1.34 | 0.22 | -999 |
| 4 | -60.79 | 139.96 | 1.04 | 1.36 | 0.27 | -999 |
| 4 | -60.78 | 140.03 | -999 | 1.34 | 0.39 | -999 |
| 4 | -60.77 | 140.03 | 1.15 | 1.17 | 0.25 | -999 |
| 4 | -60.91 | 139.98 | 1.04 | 1.07 | 0.24 | -999 |
| 4 | -61.05 | 139.93 | 1.09 | 1.14 | 0.35 | -999 |
| 4 | -61.33 | 139.85 | 1.04 | 1.08 | 0.17 | -999 |
| 4 | -61.34 | 139.85 | 1.11 | 1.12 | 0.23 | -999 |
| 4 | -61.33 | 139.85 | 1.10 | 1.07 | 0.17 | -999 |
| 4 | -61.32 | 139.89 | 1.08 | 1.05 | 0.22 | -999 |
| 4 | -61.31 | 139.88 | -999 | 0.99 | 0.22 | -999 |
| 4 | -61.31 | 139.88 | 1.04 | 0.80 | 0.04 | -999 |
| 4 | -61.57 | 139.85 | 1.02 | 0.58 | 0.01 | -999 |
| 4 | -61.75 | 139.86 | 1.19 | 0.67 | 0.02 | -999 |
| 4 | -61.85 | 139.85 | 1.32 | 0.78 | 0.06 | -999 |
| 4 | -61.85 | 139.85 | 1.35 | 0.84 | 0.03 | -999 |
| 4 | -61.89 | 139.84 | 1.32 | 0.83 | 0.14 | -999 |

|   |        |        |      |      |      |      |
|---|--------|--------|------|------|------|------|
| 4 | -62.08 | 139.84 | 1.36 | 0.88 | 0.07 | -999 |
| 4 | -62.35 | 139.82 | 1.17 | 0.77 | 0.03 | -999 |
| 4 | -62.35 | 139.81 | 1.20 | 0.77 | 0.08 | -999 |
| 4 | -62.36 | 139.80 | -999 | 0.93 | 0.16 | -999 |
| 4 | -62.35 | 139.80 | 1.12 | 0.98 | 0.20 | -999 |
| 4 | -62.36 | 139.82 | 0.93 | 1.07 | 0.27 | -999 |
| 4 | -62.36 | 139.85 | 1.00 | 1.09 | 0.43 | -999 |
| 4 | -62.32 | 139.89 | 0.96 | 0.96 | 0.33 | -999 |
| 4 | -62.31 | 139.90 | 1.01 | 0.94 | 0.30 | -999 |
| 4 | -62.05 | 139.91 | 0.98 | 0.85 | 0.22 | -999 |
| 4 | -61.93 | 139.90 | 1.07 | 0.84 | 0.29 | -999 |
| 4 | -61.55 | 139.85 | -999 | 1.02 | 0.31 | -999 |
| 4 | -61.40 | 139.82 | 1.04 | 0.95 | 0.33 | -999 |
| 4 | -61.34 | 139.82 | 0.85 | 0.89 | 0.31 | -999 |
| 4 | -61.34 | 139.81 | 0.91 | 0.96 | 0.32 | -999 |
| 4 | -61.39 | 139.83 | 0.84 | 0.83 | 0.33 | -999 |
| 4 | -61.45 | 139.82 | 0.94 | 1.03 | 0.26 | -999 |
| 4 | -61.45 | 139.77 | -999 | -999 | -999 | -999 |
| 4 | -61.57 | 139.78 | 1.01 | 0.93 | 0.22 | -999 |
| 4 | -61.96 | 139.80 | -999 | 0.96 | 0.34 | -999 |
| 4 | -62.15 | 139.81 | 1.06 | 0.80 | 0.26 | -999 |
| 4 | -62.46 | 139.66 | 1.01 | 0.78 | 0.26 | -999 |
| 4 | -62.58 | 139.75 | 1.15 | 0.90 | 0.24 | -999 |
| 4 | -62.65 | 139.82 | 0.99 | 0.89 | 0.28 | -999 |
| 4 | -62.78 | 139.84 | 0.92 | 0.91 | 0.25 | -999 |
| 4 | -62.84 | 139.86 | 0.84 | 0.89 | 0.27 | -999 |
| 4 | -62.83 | 139.86 | 0.94 | 0.93 | 0.22 | -999 |
| 4 | -62.96 | 139.87 | 0.96 | 0.74 | 0.19 | -999 |
| 4 | -63.04 | 139.90 | 0.96 | 0.69 | 0.10 | -999 |
| 4 | -63.30 | 139.94 | -999 | 0.67 | 0.11 | -999 |
| 4 | -63.37 | 139.86 | 0.82 | 0.64 | 0.11 | -999 |
| 4 | -63.36 | 139.87 | 0.87 | 0.63 | 0.19 | -999 |
| 4 | -63.36 | 139.88 | 1.17 | 0.78 | 0.19 | -999 |
| 4 | -63.36 | 139.89 | 1.43 | 0.98 | 0.13 | -999 |
| 4 | -63.37 | 139.87 | 1.42 | 1.06 | 0.16 | -999 |
| 4 | -63.64 | 139.86 | 1.35 | 1.05 | 0.17 | -999 |
| 4 | -63.76 | 139.87 | 1.27 | 0.94 | 0.15 | -999 |
| 4 | -63.90 | 139.88 | -999 | 0.93 | 0.24 | -999 |
| 4 | -63.90 | 139.87 | 0.96 | 0.86 | 0.24 | -999 |
| 4 | -63.90 | 139.85 | 0.83 | 0.81 | 0.26 | -999 |
| 4 | -63.90 | 139.90 | 0.91 | 0.90 | 0.35 | -999 |
| 4 | -63.90 | 139.99 | 0.95 | 1.04 | 0.32 | -999 |
| 4 | -63.88 | 139.99 | 0.87 | 0.82 | 0.31 | -999 |
| 4 | -63.86 | 140.01 | 0.85 | 0.85 | 0.27 | -999 |
| 4 | -63.84 | 140.02 | 0.91 | 0.88 | 0.28 | -999 |
| 4 | -63.83 | 140.01 | 0.91 | 0.99 | 0.28 | -999 |
| 4 | -63.83 | 140.00 | 1.00 | 1.01 | 0.31 | -999 |

|   |        |        |      |      |      |      |
|---|--------|--------|------|------|------|------|
| 4 | -63.81 | 139.99 | 0.96 | 1.01 | 0.23 | -999 |
| 4 | -63.81 | 139.97 | 0.98 | 0.96 | 0.20 | -999 |
| 4 | -63.81 | 139.95 | 1.08 | 0.85 | 0.17 | -999 |
| 4 | -63.84 | 139.95 | 1.18 | 0.90 | 0.26 | -999 |
| 4 | -63.83 | 139.99 | 1.23 | 0.87 | 0.29 | -999 |
| 4 | -63.82 | 140.00 | 1.14 | 0.85 | 0.26 | -999 |
| 4 | -63.79 | 140.04 | 1.00 | 0.81 | 0.34 | -999 |
| 4 | -63.78 | 140.06 | 1.02 | 0.86 | 0.29 | -999 |
| 4 | -63.76 | 140.07 | 1.25 | 0.95 | 0.43 | -999 |
| 4 | -63.74 | 140.06 | 1.26 | 0.93 | 0.42 | -999 |
| 4 | -63.72 | 140.11 | 1.14 | 0.85 | 0.39 | -999 |
| 4 | -63.72 | 140.14 | 1.02 | 0.86 | 0.31 | -999 |
| 4 | -63.95 | 140.27 | 0.88 | 0.92 | 0.32 | -999 |
| 4 | -64.05 | 140.35 | 0.91 | 0.86 | 0.38 | -999 |
| 4 | -64.17 | 140.42 | 0.91 | 1.02 | 0.35 | -999 |
| 4 | -64.17 | 140.42 | 0.99 | 0.89 | 0.30 | -999 |
| 4 | -64.19 | 140.47 | 1.09 | 0.95 | 0.25 | -999 |
| 4 | -64.28 | 140.71 | 1.18 | 1.12 | 0.23 | -999 |
| 4 | -64.42 | 141.11 | 1.26 | 1.34 | 0.30 | -999 |
| 4 | -64.49 | 141.29 | 1.34 | 1.29 | 0.31 | -999 |
| 4 | -64.52 | 141.39 | 1.32 | 1.24 | 0.23 | -999 |
| 4 | -64.52 | 141.40 | 1.40 | 1.38 | 0.35 | -999 |
| 4 | -64.64 | 141.60 | 1.39 | 1.47 | 0.31 | -999 |
| 4 | -64.73 | 141.77 | 1.43 | 1.47 | 0.34 | -999 |
| 4 | -64.78 | 141.83 | -999 | 1.63 | 0.33 | -999 |
| 4 | -64.78 | 141.84 | 1.20 | 1.60 | 0.36 | -999 |
| 4 | -65.02 | 142.45 | 0.94 | 0.90 | 0.39 | -999 |
| 4 | -65.02 | 142.44 | 0.96 | 1.14 | 0.28 | -999 |
| 4 | -65.06 | 142.48 | 0.91 | 0.95 | 0.27 | -999 |
| 4 | -65.15 | 142.73 | 0.93 | 1.01 | 0.31 | -999 |
| 4 | -65.25 | 143.08 | 0.93 | 0.91 | 0.28 | -999 |
| 4 | -65.26 | 143.08 | 0.99 | 0.93 | 0.30 | -999 |
| 4 | -65.26 | 143.09 | 1.00 | 0.96 | 0.25 | -999 |
| 4 | -65.26 | 143.11 | 1.04 | 1.09 | 0.26 | -999 |
| 4 | -65.29 | 143.18 | 1.03 | 1.05 | 0.20 | -999 |
| 4 | -65.41 | 143.19 | 1.06 | 1.07 | 0.23 | -999 |
| 4 | -65.53 | 143.17 | 0.96 | 0.97 | 0.28 | -999 |
| 4 | -65.54 | 143.17 | 1.07 | 1.12 | 0.23 | -999 |
| 4 | -65.54 | 143.18 | 1.07 | 1.03 | 0.27 | -999 |
| 4 | -65.53 | 143.19 | 0.95 | 0.81 | 0.16 | -999 |
| 4 | -65.69 | 143.07 | 1.07 | 0.65 | 0.15 | -999 |
| 4 | -65.69 | 143.08 | 1.01 | 0.60 | 0.09 | -999 |
| 4 | -65.77 | 142.96 | 0.89 | 0.50 | 0.11 | -999 |
| 4 | -65.77 | 142.90 | 1.12 | 0.54 | 0.10 | -999 |
| 4 | -65.84 | 142.92 | 1.10 | 0.53 | 0.06 | -999 |
| 4 | -65.81 | 142.90 | 1.01 | 0.44 | 0.05 | -999 |
| 4 | -65.83 | 142.93 | 1.00 | 0.51 | 0.07 | -999 |

|   |        |        |      |      |      |      |
|---|--------|--------|------|------|------|------|
| 4 | -66.00 | 143.16 | 1.05 | 0.51 | 0.03 | -999 |
| 4 | -65.99 | 143.17 | 1.08 | 0.52 | 0.12 | -999 |
| 4 | -66.07 | 143.06 | 1.04 | 0.52 | 0.05 | -999 |
| 4 | -66.15 | 142.92 | 1.11 | 0.61 | 0.04 | -999 |
| 4 | -66.20 | 142.92 | 1.11 | 0.60 | 0.03 | -999 |
| 4 | -66.20 | 143.15 | 1.21 | 0.74 | 0.06 | -999 |
| 4 | -66.20 | 143.41 | 1.14 | 0.57 | 0.02 | -999 |
| 4 | -66.20 | 143.49 | 1.17 | 0.54 | 0.08 | -999 |
| 4 | -66.27 | 143.76 | -999 | 0.49 | 0.15 | -999 |
| 4 | -66.46 | 143.99 | 0.80 | 0.40 | 0.02 | -999 |
| 4 | -66.59 | 144.20 | 0.69 | 0.35 | 0.09 | -999 |
| 4 | -66.58 | 144.21 | 0.69 | 0.35 | 0.01 | -999 |
| 4 | -66.59 | 144.24 | 0.74 | 0.39 | 0.05 | -999 |
| 4 | -66.59 | 144.25 | 1.01 | 0.44 | 0.02 | -999 |
| 4 | -66.59 | 144.25 | 1.28 | 0.53 | 0.03 | -999 |
| 4 | -66.58 | 144.25 | 1.76 | 0.69 | 0.02 | -999 |
| 4 | -66.59 | 144.28 | 1.90 | 0.73 | 0.03 | -999 |
| 4 | -66.98 | 144.58 | 1.85 | 0.66 | 0.06 | -999 |
| 4 | -67.08 | 144.78 | 1.99 | 0.73 | 0.04 | -999 |
| 4 | -67.17 | 144.78 | 1.83 | 0.72 | 0.03 | -999 |
| 4 | -67.16 | 144.77 | 1.94 | 0.65 | 0.04 | -999 |
| 4 | -67.16 | 144.95 | 1.79 | 0.58 | 0.08 | -999 |
| 4 | -67.04 | 145.28 | 1.78 | 0.72 | 0.06 | -999 |
| 4 | -66.97 | 145.26 | 1.64 | 0.70 | 0.09 | -999 |
| 4 | -66.96 | 145.22 | 1.66 | 0.60 | 0.01 | -999 |
| 4 | -66.62 | 144.66 | -999 | 0.65 | 0.04 | -999 |
| 4 | -66.49 | 144.48 | 0.75 | 0.53 | 0.08 | -999 |
| 4 | -66.38 | 144.30 | 0.63 | 0.54 | 0.08 | -999 |
| 4 | -66.37 | 144.32 | 0.72 | 0.50 | 0.14 | -999 |
| 4 | -66.24 | 144.43 | 0.76 | 0.50 | 0.11 | -999 |
| 4 | -66.13 | 144.50 | 0.84 | 0.55 | 0.10 | -999 |
| 4 | -66.02 | 144.49 | 0.84 | 0.56 | 0.13 | -999 |
| 4 | -65.97 | 144.49 | 0.82 | 0.59 | 0.13 | -999 |
| 4 | -65.89 | 144.51 | 0.80 | 0.65 | 0.09 | -999 |
| 4 | -65.81 | 144.51 | 0.94 | 0.57 | 0.06 | -999 |
| 4 | -65.79 | 144.53 | 1.01 | 0.60 | 0.07 | -999 |
| 4 | -65.78 | 144.53 | 1.07 | 0.55 | 0.14 | -999 |
| 4 | -65.80 | 144.23 | 1.16 | 0.61 | 0.04 | -999 |
| 4 | -65.85 | 143.66 | 1.26 | 0.64 | 0.09 | -999 |
| 4 | -66.09 | 142.68 | 1.15 | 0.61 | 0.04 | -999 |
| 4 | -66.19 | 142.39 | 1.21 | 0.61 | 0.05 | -999 |
| 4 | -66.35 | 141.76 | -999 | 0.66 | 0.01 | -999 |
| 4 | -66.34 | 141.76 | 1.00 | 0.56 | 0.04 | -999 |
| 4 | -66.34 | 141.76 | 0.86 | 0.71 | 0.06 | -999 |
| 4 | -66.33 | 141.76 | 0.79 | 0.65 | 0.14 | -999 |
| 4 | -66.33 | 141.77 | 0.75 | 0.58 | 0.03 | -999 |
| 4 | -66.33 | 141.77 | 0.73 | 0.64 | 0.08 | -999 |

|   |        |        |      |      |      |      |
|---|--------|--------|------|------|------|------|
| 4 | -66.42 | 141.94 | 0.73 | 0.48 | 0.01 | -999 |
| 4 | -66.56 | 141.91 | 0.82 | 0.48 | 0.06 | -999 |
| 4 | -66.62 | 141.79 | 0.94 | 0.65 | 0.00 | -999 |
| 4 | -66.61 | 141.78 | 1.00 | 0.79 | 0.06 | -999 |
| 4 | -66.48 | 141.98 | 1.11 | 0.95 | 0.05 | -999 |
| 4 | -66.46 | 141.76 | 1.32 | 1.01 | 0.08 | -999 |
| 4 | -66.47 | 141.48 | 1.78 | 0.89 | 0.04 | -999 |
| 4 | -66.46 | 141.41 | 1.78 | 0.90 | 0.04 | -999 |
| 4 | -66.46 | 141.41 | 1.36 | 1.10 | 0.02 | -999 |
| 4 | -66.46 | 141.41 | 1.15 | 1.05 | 0.02 | -999 |
| 4 | -66.47 | 141.43 | 1.07 | 0.99 | 0.09 | -999 |
| 4 | -66.47 | 141.45 | 0.92 | 0.82 | 0.01 | -999 |
| 4 | -66.47 | 141.50 | 0.73 | 0.59 | 0.05 | -999 |
| 4 | -66.47 | 141.53 | 0.62 | 0.54 | 0.06 | -999 |
| 4 | -66.47 | 141.58 | 0.60 | 0.43 | 0.08 | -999 |
| 4 | -66.47 | 141.61 | 0.54 | 0.51 | 0.14 | -999 |
| 4 | -66.46 | 141.66 | 0.56 | 0.51 | 0.05 | -999 |
| 4 | -66.46 | 141.68 | 0.55 | 0.51 | -999 | -999 |
| 4 | -66.46 | 141.72 | 0.66 | 0.56 | 0.04 | -999 |
| 4 | -66.47 | 141.70 | 1.51 | 0.78 | 0.02 | -999 |
| 4 | -66.47 | 141.70 | 1.55 | 0.84 | 0.05 | -999 |
| 4 | -66.46 | 141.67 | 1.51 | 0.86 | 0.03 | -999 |
| 4 | -66.47 | 141.56 | 1.23 | 0.79 | 0.09 | -999 |
| 4 | -66.56 | 141.47 | 0.80 | 0.63 | 0.09 | -999 |
| 4 | -66.56 | 141.47 | 0.70 | 0.52 | 0.10 | -999 |
| 4 | -66.56 | 141.47 | 0.66 | 0.57 | 0.10 | -999 |
| 4 | -66.56 | 141.47 | 0.78 | 0.55 | 0.08 | -999 |
| 4 | -66.56 | 141.47 | 1.01 | 0.69 | 0.08 | -999 |
| 4 | -66.56 | 141.47 | 0.96 | 0.69 | 0.14 | -999 |
| 4 | -66.56 | 141.47 | 1.27 | 0.97 | 0.18 | -999 |
| 4 | -66.56 | 141.47 | 1.35 | 0.90 | 0.04 | -999 |
| 4 | -66.56 | 141.47 | 1.38 | 0.77 | 0.19 | -999 |
| 4 | -66.56 | 141.48 | 1.22 | 0.77 | 0.16 | -999 |
| 4 | -66.31 | 141.26 | 1.45 | 1.03 | 0.19 | -999 |
| 4 | -66.22 | 141.03 | 1.24 | 1.02 | 0.37 | -999 |
| 4 | -66.05 | 140.56 | 1.45 | 0.99 | 0.39 | -999 |
| 4 | -66.01 | 140.31 | 1.66 | 1.19 | 0.43 | -999 |
| 4 | -65.93 | 140.51 | 1.57 | 1.20 | 0.19 | -999 |
| 4 | -65.92 | 140.73 | 1.54 | 1.28 | 0.20 | -999 |
| 4 | -65.79 | 140.92 | 1.13 | 1.12 | 0.14 | -999 |
| 4 | -65.74 | 141.07 | 1.08 | 1.03 | 0.13 | -999 |
| 4 | -65.70 | 141.12 | 0.84 | 0.86 | 0.17 | -999 |
| 4 | -65.68 | 141.17 | 0.97 | 0.82 | 0.16 | -999 |
| 4 | -65.67 | 141.20 | 0.64 | 0.66 | 0.19 | -999 |
| 4 | -65.61 | 141.24 | 0.65 | 0.78 | 0.19 | -999 |
| 4 | -65.56 | 141.29 | 0.67 | 0.97 | 0.21 | -999 |
| 4 | -65.50 | 141.26 | 0.72 | 0.62 | 0.15 | -999 |



|   |        |        |      |      |      |      |
|---|--------|--------|------|------|------|------|
| 4 | -65.50 | 141.26 | 0.81 | 0.67 | 0.18 | -999 |
| 4 | -65.33 | 141.29 | 0.92 | 0.74 | 0.17 | -999 |
| 4 | -65.32 | 141.29 | 0.95 | 0.76 | 0.21 | -999 |
| 4 | -65.30 | 141.11 | 0.92 | 0.70 | 0.20 | -999 |
| 4 | -65.21 | 140.85 | 0.94 | 0.72 | 0.18 | -999 |
| 4 | -65.13 | 140.64 | 0.92 | 0.78 | 0.17 | -999 |
| 4 | -65.13 | 140.65 | 0.95 | 0.86 | 0.16 | -999 |
| 4 | -65.02 | 140.40 | 0.94 | 0.81 | 0.12 | -999 |
| 4 | -64.95 | 140.17 | 1.03 | 0.83 | 0.12 | -999 |
| 4 | -64.88 | 139.88 | 0.99 | 0.84 | 0.12 | -999 |
| 4 | -64.88 | 139.87 | 0.97 | 0.83 | 0.11 | -999 |
| 4 | -64.87 | 139.87 | 0.92 | 0.68 | 0.10 | -999 |
| 4 | -64.87 | 139.88 | 1.01 | 0.75 | 0.11 | -999 |
| 4 | -64.87 | 139.87 | 1.07 | 0.81 | 0.07 | -999 |
| 4 | -64.87 | 139.86 | 1.00 | 0.66 | 0.04 | -999 |
| 4 | -64.87 | 139.85 | 0.80 | 0.53 | 0.05 | -999 |
| 4 | -64.86 | 139.85 | 0.81 | 0.57 | 0.08 | -999 |
| 4 | -64.87 | 139.89 | 0.80 | 0.56 | 0.02 | -999 |
| 4 | -64.79 | 139.91 | 0.81 | 0.53 | 0.06 | -999 |
| 4 | -64.51 | 139.89 | 0.83 | 0.57 | 0.08 | -999 |
| 4 | -64.51 | 139.90 | 0.83 | 0.57 | -999 | -999 |
| 4 | -64.38 | 139.94 | 0.83 | 0.59 | 0.06 | -999 |
| 4 | -64.26 | 139.91 | 0.88 | 0.55 | 0.02 | -999 |
| 4 | -63.99 | 139.89 | 0.94 | 0.52 | 0.08 | -999 |
| 4 | -63.91 | 139.84 | 1.06 | 0.43 | 0.04 | -999 |
| 4 | -63.91 | 139.83 | 1.02 | 0.45 | 0.08 | -999 |
| 4 | -63.90 | 139.81 | 1.00 | 0.58 | 0.08 | -999 |
| 4 | -63.89 | 139.80 | 1.00 | 0.58 | 0.01 | -999 |
| 4 | -63.88 | 139.76 | 0.86 | 0.51 | 0.05 | -999 |
| 4 | -63.87 | 139.66 | 0.93 | 0.49 | 0.15 | -999 |
| 4 | -63.86 | 139.37 | 1.02 | 0.65 | 0.18 | -999 |
| 4 | -63.84 | 139.37 | 1.03 | 0.54 | 0.13 | -999 |
| 4 | -63.79 | 139.35 | 0.83 | 0.47 | 0.10 | -999 |
| 4 | -63.78 | 139.26 | 0.82 | 0.53 | 0.06 | -999 |
| 4 | -63.76 | 139.29 | 0.83 | 0.49 | 0.04 | -999 |
| 4 | -63.75 | 139.35 | 0.89 | 0.63 | 0.02 | -999 |
| 4 | -63.72 | 139.47 | 0.95 | 0.59 | 0.08 | -999 |
| 4 | -63.66 | 139.49 | 1.13 | 0.66 | 0.03 | -999 |
| 4 | -63.44 | 139.54 | 1.24 | 0.68 | 0.06 | -999 |
| 4 | -63.30 | 139.58 | 1.26 | 0.72 | 0.06 | -999 |
| 4 | -63.13 | 139.60 | 1.38 | 1.16 | 0.21 | -999 |
| 4 | -63.05 | 139.61 | 1.47 | 1.30 | 0.19 | -999 |
| 4 | -62.87 | 139.65 | 1.43 | 1.22 | 0.15 | -999 |
| 4 | -62.76 | 139.67 | 1.50 | 1.15 | 0.24 | -999 |
| 4 | -62.77 | 139.95 | 1.32 | 1.02 | 0.21 | -999 |
| 4 | -62.82 | 139.99 | 1.20 | 1.15 | 0.27 | -999 |
| 4 | -62.78 | 140.01 | -999 | 1.30 | 0.31 | -999 |

|   |        |        |      |      |      |      |
|---|--------|--------|------|------|------|------|
| 4 | -62.68 | 140.07 | 1.10 | 1.08 | 0.13 | -999 |
| 4 | -62.61 | 140.68 | 1.21 | 1.11 | 0.17 | -999 |
| 4 | -62.41 | 140.60 | 1.42 | 1.22 | 0.30 | -999 |
| 4 | -62.01 | 140.35 | 1.21 | 1.30 | 0.20 | -999 |
| 4 | -61.83 | 140.44 | 1.01 | 1.26 | 0.20 | -999 |
| 4 | -61.58 | 140.29 | 0.78 | 0.94 | 0.18 | -999 |
| 4 | -61.42 | 140.20 | 0.74 | 0.95 | 0.17 | -999 |
| 4 | -61.12 | 139.98 | 0.85 | 1.07 | 0.19 | -999 |
| 4 | -60.99 | 139.84 | 1.09 | 1.06 | 0.20 | -999 |
| 4 | -60.84 | 139.88 | 1.18 | 0.93 | 0.21 | -999 |
| 4 | -60.84 | 139.89 | 1.04 | 0.95 | 0.19 | -999 |
| 4 | -60.83 | 139.90 | 0.91 | 0.96 | 0.21 | -999 |
| 4 | -60.83 | 139.92 | 0.91 | 0.89 | 0.27 | -999 |
| 4 | -60.83 | 139.94 | 0.93 | 0.93 | 0.27 | -999 |
| 4 | -60.82 | 139.96 | 0.90 | 0.97 | 0.31 | -999 |
| 4 | -60.80 | 139.94 | 1.02 | 1.04 | 0.15 | -999 |
| 4 | -60.80 | 139.95 | 0.89 | 0.93 | 0.17 | -999 |
| 4 | -60.69 | 139.93 | 0.83 | 0.96 | 0.20 | -999 |
| 4 | -60.49 | 139.93 | 0.79 | 1.03 | 0.16 | -999 |
| 4 | -60.24 | 139.82 | 0.82 | 0.97 | 0.12 | -999 |
| 4 | -59.28 | 139.86 | 0.99 | 1.05 | 0.13 | -999 |
| 4 | -58.81 | 139.90 | 1.02 | 1.01 | 0.18 | -999 |
| 4 | -58.59 | 139.91 | 1.01 | 1.02 | 0.23 | -999 |
| 4 | -58.14 | 139.96 | 1.12 | 1.03 | 0.24 | -999 |
| 4 | -57.92 | 139.97 | 1.20 | 1.09 | 0.24 | -999 |
| 4 | -57.60 | 139.96 | 1.26 | 1.15 | 0.29 | -999 |
| 4 | -57.47 | 139.94 | 1.30 | 1.10 | 0.17 | -999 |
| 4 | -57.23 | 139.92 | 1.04 | 1.00 | 0.29 | -999 |
| 4 | -57.10 | 139.89 | 0.89 | 0.98 | 0.25 | -999 |
| 4 | -56.92 | 139.84 | 0.76 | 0.96 | 0.34 | -999 |
| 4 | -56.89 | 139.81 | 0.77 | 1.05 | 0.33 | -999 |
| 4 | -56.83 | 139.71 | 0.78 | 1.17 | 0.46 | -999 |
| 4 | -56.92 | 139.90 | 0.77 | 1.09 | 0.36 | -999 |
| 4 | -56.92 | 139.83 | 0.91 | 0.98 | 0.40 | -999 |
| 4 | -56.91 | 139.77 | 0.84 | 0.92 | 0.35 | -999 |
| 4 | -56.89 | 139.65 | 0.82 | 0.87 | 0.29 | -999 |
| 4 | -56.88 | 139.59 | 0.85 | 0.94 | 0.31 | -999 |
| 4 | -56.85 | 139.49 | 0.82 | 0.97 | 0.21 | -999 |
| 4 | -56.84 | 139.45 | 0.83 | 1.02 | 0.30 | -999 |
| 4 | -56.83 | 139.36 | 0.89 | 1.00 | 0.19 | -999 |
| 4 | -56.83 | 139.31 | 0.89 | 1.00 | 0.18 | -999 |
| 4 | -56.81 | 139.62 | 1.00 | 0.92 | 0.15 | -999 |
| 4 | -56.79 | 140.04 | 1.12 | 0.93 | 0.22 | -999 |
| 4 | -56.82 | 140.07 | 1.06 | 0.98 | 0.18 | -999 |
| 4 | -56.93 | 139.83 | 1.02 | 0.93 | 0.15 | -999 |
| 4 | -56.92 | 139.81 | 1.06 | 0.91 | 0.16 | -999 |
| 4 | -56.57 | 140.09 | 1.18 | 0.96 | 0.15 | -999 |

|   |        |        |      |      |      |      |
|---|--------|--------|------|------|------|------|
| 4 | -56.35 | 140.24 | 1.23 | 0.98 | 0.17 | -999 |
| 4 | -55.90 | 140.54 | 1.20 | 0.86 | 0.15 | -999 |
| 4 | -55.68 | 140.67 | 1.14 | 1.00 | 0.13 | -999 |
| 4 | -55.23 | 140.95 | 0.96 | 0.88 | 0.12 | -999 |
| 4 | -55.01 | 141.09 | 0.83 | 0.83 | 0.12 | -999 |
| 4 | -54.57 | 141.36 | 0.76 | 0.81 | 0.24 | -999 |
| 4 | -54.34 | 141.49 | 0.73 | 0.82 | 0.10 | -999 |
| 4 | -53.91 | 141.77 | 0.85 | 0.84 | 0.17 | -999 |
| 4 | -53.71 | 141.90 | 0.90 | 0.84 | 0.11 | -999 |
| 4 | -53.52 | 142.05 | 0.90 | 0.80 | 0.13 | -999 |
| 4 | -53.13 | 142.30 | 0.93 | 0.76 | 0.10 | -999 |
| 4 | -52.91 | 142.43 | 0.98 | 0.78 | 0.19 | -999 |
| 4 | -52.47 | 142.67 | 1.02 | 0.80 | 0.11 | -999 |
| 4 | -52.23 | 142.78 | 1.01 | 0.78 | 0.16 | -999 |
| 4 | -51.77 | 142.98 | 1.04 | 0.77 | 0.17 | -999 |
| 4 | -51.54 | 143.09 | 1.04 | 0.82 | 0.21 | -999 |
| 4 | -51.08 | 143.28 | 0.90 | 0.79 | 0.13 | -999 |
| 4 | -51.01 | 143.31 | 0.79 | 0.75 | 0.10 | -999 |
| 4 | -51.00 | 143.32 | 0.72 | 0.74 | 0.13 | -999 |
| 4 | -50.95 | 143.36 | 0.74 | 0.79 | 0.17 | -999 |
| 4 | -50.90 | 143.38 | 0.82 | 0.86 | 0.21 | -999 |
| 4 | -50.94 | 143.33 | 0.79 | 0.83 | 0.21 | -999 |
| 4 | -51.05 | 143.20 | 0.79 | 0.82 | 0.29 | -999 |
| 4 | -51.11 | 143.14 | 0.74 | 1.07 | 0.35 | -999 |
| 4 | -51.22 | 143.05 | 0.79 | 1.03 | 0.52 | -999 |
| 4 | -51.28 | 143.01 | 0.85 | 1.05 | 0.61 | -999 |
| 4 | -51.39 | 142.98 | 1.13 | 1.00 | 0.54 | -999 |
| 4 | -51.34 | 143.02 | 1.29 | 1.02 | 0.73 | -999 |
| 4 | -50.89 | 143.28 | 1.27 | 1.11 | 0.56 | -999 |
| 4 | -50.19 | 143.64 | 1.07 | 0.95 | 0.52 | -999 |
| 4 | -49.96 | 143.75 | 1.03 | 0.98 | 0.55 | -999 |
| 4 | -49.51 | 144.03 | 1.13 | 0.93 | 0.57 | -999 |
| 4 | -49.29 | 144.17 | 1.11 | 0.94 | 0.47 | -999 |
| 4 | -48.85 | 144.43 | 1.02 | 0.85 | 0.54 | -999 |
| 4 | -48.63 | 144.56 | 1.05 | 0.86 | 0.46 | -999 |
| 4 | -48.18 | 144.79 | 0.92 | 0.85 | 0.44 | -999 |
| 4 | -47.96 | 144.90 | 0.87 | 0.83 | 0.44 | -999 |
| 4 | -47.52 | 145.11 | 0.95 | 0.83 | 0.46 | -999 |
| 4 | -47.30 | 145.24 | 0.79 | 0.76 | 0.41 | -999 |
| 4 | -46.87 | 145.51 | 0.70 | 0.68 | 0.32 | -999 |
| 4 | -46.64 | 145.65 | 0.71 | 0.71 | 0.35 | -999 |
| 4 | -45.95 | 146.05 | 0.67 | 0.74 | 0.30 | -999 |
| 4 | -44.85 | 146.68 | 0.76 | 0.73 | 0.32 | -999 |
| 4 | -44.63 | 146.78 | 0.73 | 0.68 | 0.33 | -999 |
| 5 | -999   | -999   | -999 | -999 | 0.96 | -999 |
| 5 | 27.16  | -79.36 | -999 | -999 | 0.95 | -999 |
| 5 | 27.30  | -79.28 | -999 | -999 | 1.15 | -999 |

|   |       |        |      |      |      |      |
|---|-------|--------|------|------|------|------|
| 5 | 27.92 | -78.42 | -999 | 1.28 | 0.68 | -999 |
| 5 | 28.10 | -78.06 | -999 | 1.99 | 0.68 | -999 |
| 5 | 29.45 | -75.33 | -999 | 0.86 | 0.26 | -999 |
| 5 | 30.17 | -73.76 | -999 | -999 | 0.32 | -999 |
| 5 | 30.42 | -73.13 | -999 | 0.49 | 0.39 | -999 |
| 5 | 30.65 | -72.62 | -999 | 0.66 | 0.59 | -999 |
| 5 | 30.81 | -72.35 | -999 | -999 | 0.43 | -999 |
| 5 | 31.04 | -71.80 | -999 | -999 | 0.48 | -999 |
| 5 | 31.14 | -71.52 | -999 | 0.31 | 0.58 | -999 |
| 5 | 31.37 | -70.95 | -999 | 0.38 | 0.62 | -999 |
| 5 | 31.49 | -70.68 | -999 | 0.79 | 0.68 | -999 |
| 5 | 31.75 | -70.17 | -999 | 0.82 | 0.72 | -999 |
| 5 | 31.88 | -69.87 | -999 | 0.93 | 0.79 | -999 |
| 5 | 32.09 | -69.29 | -999 | 0.58 | 0.58 | -999 |
| 5 | 32.20 | -69.00 | -999 | 0.08 | 0.77 | -999 |
| 5 | 32.42 | -68.41 | -999 | 0.37 | 0.71 | -999 |
| 5 | 32.52 | -68.12 | 0.40 | -999 | 0.43 | -999 |
| 5 | 32.74 | -67.55 | 0.44 | 0.86 | 0.44 | -999 |
| 5 | 32.86 | -67.27 | 0.62 | 0.78 | 0.53 | -999 |
| 5 | 33.05 | -66.73 | 0.33 | 1.14 | 0.41 | -999 |
| 5 | 33.18 | -66.44 | 0.45 | 0.68 | 0.42 | -999 |
| 5 | 33.40 | -65.85 | 0.43 | 0.41 | 0.48 | -999 |
| 5 | 33.52 | -65.55 | -999 | 0.83 | 0.51 | -999 |
| 5 | 33.64 | -65.19 | 0.31 | 0.46 | 0.48 | -999 |
| 5 | 33.75 | -64.87 | 0.42 | 0.76 | 0.53 | -999 |
| 5 | 33.98 | -64.25 | 0.30 | 1.04 | 0.64 | -999 |
| 5 | 34.09 | -63.95 | -999 | 1.07 | 0.78 | -999 |
| 5 | 36.11 | -57.36 | 0.34 | 0.90 | 0.68 | -999 |
| 5 | 36.19 | -57.02 | -999 | 0.74 | 1.06 | -999 |
| 5 | 36.36 | -56.42 | 0.34 | 1.03 | 0.82 | -999 |
| 5 | 36.43 | -56.10 | -999 | 1.20 | 0.91 | -999 |
| 5 | 36.62 | -55.46 | 0.41 | 0.63 | 0.90 | -999 |
| 5 | 36.71 | -55.13 | 0.56 | 0.64 | 0.81 | -999 |
| 5 | 36.73 | -54.80 | 0.49 | 0.98 | 0.92 | -999 |
| 5 | 36.69 | -54.76 | 0.63 | -999 | -999 | -999 |
| 5 | 36.82 | -54.49 | -999 | -999 | -999 | -999 |
| 5 | 36.90 | -54.29 | -999 | -999 | -999 | -999 |
| 5 | 37.08 | -53.71 | 0.34 | 0.91 | 0.37 | -999 |
| 5 | 37.13 | -53.40 | 0.49 | 1.02 | 0.67 | -999 |
| 5 | 37.29 | -52.66 | 0.46 | 0.98 | 0.73 | -999 |
| 5 | 37.38 | -52.28 | -999 | -999 | -999 | -999 |
| 5 | 37.51 | -51.70 | 0.47 | 0.56 | 0.99 | -999 |
| 5 | 37.57 | -51.42 | 0.46 | 0.71 | 0.98 | -999 |
| 5 | 37.69 | -50.84 | 0.61 | 1.11 | 0.82 | -999 |
| 5 | 37.76 | -50.56 | 0.63 | 1.36 | 0.98 | -999 |
| 5 | 37.97 | -49.43 | 0.55 | 1.39 | 0.90 | -999 |
| 5 | 38.04 | -49.13 | 0.43 | 1.03 | 0.83 | -999 |

|   |       |        |      |      |      |      |
|---|-------|--------|------|------|------|------|
| 5 | 38.12 | -48.54 | 0.51 | 1.32 | 0.71 | -999 |
| 5 | 38.18 | -48.24 | -999 | 1.24 | 0.69 | -999 |
| 5 | 38.26 | -47.86 | -999 | -999 | 0.63 | -999 |
| 5 | 38.32 | -47.56 | 0.43 | 1.26 | 0.55 | -999 |
| 5 | 38.41 | -46.96 | 0.37 | 0.75 | 0.54 | -999 |
| 5 | 38.46 | -46.63 | 0.51 | 0.72 | 0.41 | -999 |
| 5 | 38.59 | -45.96 | 0.41 | 1.11 | 0.54 | -999 |
| 5 | 38.65 | -45.66 | 0.50 | 1.10 | 0.62 | -999 |
| 5 | 38.74 | -45.04 | 0.62 | 0.59 | 0.63 | -999 |
| 5 | 38.78 | -44.72 | 0.75 | 1.13 | 0.65 | -999 |
| 5 | 38.88 | -44.13 | 0.72 | 0.64 | 0.56 | -999 |
| 5 | 38.92 | -43.80 | 0.52 | 1.24 | 0.72 | -999 |
| 5 | 39.00 | -43.11 | 0.46 | 0.81 | 0.82 | -999 |
| 5 | 39.03 | -42.84 | 0.53 | 1.18 | 0.97 | -999 |
| 5 | 39.14 | -42.20 | 0.42 | 0.89 | 0.84 | -999 |
| 5 | 39.20 | -41.88 | 0.42 | 0.97 | 0.63 | -999 |
| 5 | 39.29 | -41.07 | 0.30 | 0.83 | 0.36 | -999 |
| 5 | 39.32 | -40.73 | 0.42 | 0.72 | 0.29 | -999 |
| 5 | 39.39 | -40.01 | 0.46 | 0.96 | 0.42 | -999 |
| 5 | 39.44 | -39.69 | 0.44 | 0.79 | 0.31 | -999 |
| 5 | 39.61 | -38.18 | 0.40 | 0.80 | 0.28 | -999 |
| 5 | 39.65 | -37.88 | 0.58 | 1.01 | 0.35 | -999 |
| 5 | 39.68 | -37.24 | 0.24 | 1.22 | 0.29 | -999 |
| 5 | 39.69 | -37.07 | 0.45 | 1.32 | 0.37 | -999 |
| 5 | 39.73 | -36.41 | 0.31 | 1.27 | 0.35 | -999 |
| 5 | 39.77 | -36.09 | 0.43 | 1.07 | 0.41 | -999 |
| 5 | 39.84 | -35.13 | -999 | -999 | -999 | -999 |
| 5 | 39.86 | -34.57 | -999 | -999 | -999 | -999 |
| 5 | 39.89 | -33.62 | 0.37 | 0.78 | 0.37 | -999 |
| 5 | 39.89 | -33.26 | -999 | 0.77 | 0.61 | -999 |
| 5 | 39.88 | -32.70 | 0.40 | 1.36 | 0.89 | -999 |
| 5 | 39.87 | -32.70 | 0.33 | 1.67 | 0.88 | -999 |
| 5 | 39.91 | -32.13 | 0.80 | 1.97 | 1.05 | -999 |
| 5 | 39.89 | -31.75 | 1.22 | 1.47 | 0.93 | -999 |
| 5 | 39.84 | -30.98 | 1.40 | 1.41 | 0.80 | -999 |
| 5 | 39.85 | -30.60 | 1.26 | 1.43 | 0.93 | -999 |
| 5 | 39.89 | -29.84 | 0.58 | 1.09 | 0.68 | -999 |
| 5 | 39.92 | -29.46 | -999 | -999 | -999 | -999 |
| 5 | 39.96 | -28.59 | 0.47 | 0.88 | 0.66 | -999 |
| 5 | 39.98 | -28.20 | 0.60 | 0.98 | 0.66 | -999 |
| 5 | 40.04 | -27.23 | 0.96 | -999 | -999 | -999 |
| 5 | 40.06 | -26.84 | 0.94 | 0.88 | 0.54 | -999 |
| 5 | 40.05 | -26.09 | 0.51 | 1.13 | 0.60 | -999 |
| 5 | 40.05 | -25.71 | 0.66 | 0.88 | 0.61 | -999 |
| 5 | 40.00 | -25.56 | 0.39 | 0.66 | 0.55 | -999 |
| 5 | 39.99 | -25.44 | 0.51 | 0.63 | 0.44 | -999 |
| 5 | 39.97 | -24.95 | 0.44 | 0.70 | 0.33 | -999 |

|   |       |        |      |      |      |      |
|---|-------|--------|------|------|------|------|
| 5 | 39.96 | -24.73 | 0.61 | 1.10 | 0.39 | -999 |
| 5 | 39.95 | -23.72 | 0.65 | 1.00 | 0.42 | -999 |
| 5 | 39.94 | -22.45 | 0.55 | 0.61 | 0.49 | -999 |
| 5 | 39.94 | -21.98 | 0.52 | 0.99 | 0.61 | -999 |
| 5 | 39.92 | -21.23 | 0.62 | 0.86 | 0.80 | -999 |
| 5 | 39.85 | -20.16 | 0.56 | 0.76 | 0.69 | -999 |
| 5 | 39.84 | -20.09 | 0.65 | 0.97 | 0.64 | -999 |
| 5 | 39.77 | -19.93 | 0.46 | 0.89 | 0.53 | -999 |
| 5 | 39.74 | -19.62 | 0.47 | 1.16 | 0.60 | -999 |
| 5 | 39.71 | -19.09 | -999 | 0.83 | 0.67 | -999 |
| 5 | 39.69 | -18.71 | 0.46 | 1.15 | 0.71 | -999 |
| 5 | 39.64 | -17.94 | 0.39 | 0.79 | 0.65 | -999 |
| 5 | 39.62 | -17.57 | 0.47 | 0.85 | 0.47 | -999 |
| 5 | 39.56 | -16.63 | 0.54 | 0.72 | 0.54 | -999 |
| 5 | 39.54 | -16.26 | 0.47 | 0.89 | 0.73 | -999 |
| 5 | 39.46 | -15.39 | -999 | -999 | -999 | -999 |
| 5 | 39.40 | -15.03 | -999 | 0.71 | 1.17 | -999 |
| 5 | 39.32 | -14.31 | 0.41 | 0.84 | 1.30 | -999 |
| 5 | 39.28 | -13.95 | 0.58 | 1.00 | 1.60 | -999 |
| 5 | 39.27 | -13.40 | 0.48 | 1.25 | 1.35 | -999 |
| 5 | 39.35 | -13.27 | 0.69 | 0.96 | 1.23 | -999 |
| 5 | 39.49 | -13.02 | 0.54 | 1.26 | 1.07 | -999 |
| 5 | 39.41 | -12.66 | -999 | 0.93 | 1.27 | -999 |
| 5 | 39.23 | -11.94 | -999 | 0.95 | 1.19 | -999 |
| 5 | 39.15 | -11.60 | -999 | 0.81 | 1.27 | -999 |
| 5 | -999  | -999   | 0.72 | 1.66 | 1.24 | -999 |
| 5 | -999  | -999   | 1.21 | 1.85 | 1.00 | -999 |
| 5 | 40.12 | -11.75 | 0.64 | 1.95 | 0.72 | -999 |
| 5 | 40.33 | -12.10 | 0.85 | 1.67 | 0.93 | -999 |
| 5 | 40.67 | -12.63 | 0.45 | 1.68 | 0.93 | -999 |
| 5 | 40.85 | -12.90 | 0.73 | 1.97 | 1.07 | -999 |
| 5 | 41.20 | -13.44 | 0.78 | 1.23 | 0.86 | -999 |
| 5 | 41.36 | -13.71 | 0.80 | 1.32 | 0.84 | -999 |
| 5 | 41.70 | -14.24 | 0.61 | 0.96 | 0.75 | -999 |
| 5 | 41.84 | -14.51 | 0.80 | 2.11 | 0.95 | -999 |
| 5 | 42.01 | -14.82 | 0.41 | 1.50 | 0.53 | -999 |
| 5 | 42.01 | -14.84 | 0.58 | 1.81 | 0.58 | -999 |
| 5 | 42.21 | -15.13 | 0.36 | 1.46 | 0.39 | -999 |
| 5 | 42.38 | -15.40 | 0.58 | 1.73 | 0.56 | -999 |
| 5 | 42.72 | -15.95 | 0.40 | 1.75 | 0.39 | -999 |
| 5 | 42.89 | -16.23 | 0.95 | 1.90 | 0.68 | -999 |
| 5 | 43.28 | -16.81 | 0.56 | 1.61 | 0.86 | -999 |
| 5 | 43.43 | -17.10 | -999 | 1.17 | 1.29 | -999 |
| 5 | 43.75 | -17.66 | 0.42 | 0.97 | 0.78 | -999 |
| 5 | 43.92 | -17.92 | 0.39 | 0.66 | 0.97 | -999 |
| 5 | 44.25 | -18.48 | 0.40 | 1.23 | 0.90 | -999 |
| 5 | 44.41 | -18.77 | 0.29 | 1.34 | 0.87 | -999 |

|   |       |        |      |      |      |      |
|---|-------|--------|------|------|------|------|
| 5 | 44.76 | -19.34 | 0.37 | 0.90 | 0.45 | -999 |
| 5 | 44.89 | -19.57 | 0.26 | 0.95 | 0.36 | -999 |
| 5 | 45.03 | -19.85 | 0.31 | 1.02 | 0.66 | -999 |
| 5 | 45.32 | -20.51 | 0.43 | 0.90 | 0.38 | -999 |
| 5 | 45.42 | -20.77 | 0.34 | 0.86 | 0.59 | -999 |
| 5 | 45.83 | -21.25 | 0.24 | 0.69 | 0.43 | -999 |
| 5 | 46.17 | -21.50 | 0.51 | 1.37 | 0.55 | -999 |
| 5 | 46.64 | -21.88 | 0.31 | 0.79 | 0.37 | -999 |
| 5 | 46.75 | -22.00 | 0.35 | 1.21 | 0.49 | -999 |
| 5 | 46.22 | -22.00 | 0.32 | 1.10 | 0.48 | -999 |
| 5 | 45.96 | -22.00 | 0.50 | 1.11 | 0.52 | -999 |
| 5 | 45.90 | -21.40 | 0.36 | 0.94 | 0.34 | -999 |
| 5 | 46.04 | -21.40 | 0.43 | 1.12 | 0.43 | -999 |
| 5 | 46.20 | -21.40 | 0.24 | -999 | -999 | -999 |
| 5 | 46.20 | -21.46 | 0.67 | -999 | -999 | -999 |
| 5 | 45.95 | -21.54 | 0.73 | 1.33 | 0.58 | -999 |
| 5 | 46.14 | -21.53 | 0.32 | 1.04 | 0.37 | -999 |
| 5 | 46.22 | -21.60 | -999 | 1.17 | 0.40 | -999 |
| 5 | 45.97 | -21.67 | 0.23 | 1.01 | 0.32 | -999 |
| 5 | 46.10 | -21.67 | 0.40 | 1.08 | 0.31 | -999 |
| 5 | 46.04 | -21.73 | -999 | 0.75 | 0.38 | -999 |
| 5 | 45.95 | -21.74 | 0.56 | 1.02 | 0.64 | -999 |
| 5 | 46.07 | -21.60 | 0.27 | -999 | 0.47 | -999 |
| 5 | 46.14 | -21.52 | 0.26 | 1.00 | 0.51 | -999 |
| 5 | 46.10 | -21.55 | 0.32 | 0.93 | 0.51 | -999 |
| 5 | 46.07 | -21.56 | 0.29 | 0.87 | 0.48 | -999 |
| 5 | 46.14 | -21.52 | -999 | 0.94 | 0.33 | -999 |
| 5 | 46.19 | -21.47 | 0.48 | 1.02 | 0.45 | -999 |
| 5 | 46.31 | -21.32 | 0.17 | 0.55 | 0.35 | -999 |
| 5 | 46.37 | -21.31 | 0.35 | 1.46 | 0.49 | -999 |
| 5 | 46.18 | -21.50 | -999 | -999 | -999 | -999 |
| 5 | 46.16 | -21.49 | -999 | 1.02 | 0.62 | -999 |
| 5 | 46.21 | -21.49 | -999 | 0.86 | 0.60 | -999 |
| 5 | 46.27 | -21.48 | -999 | 1.31 | 0.65 | -999 |
| 5 | 46.11 | -21.35 | -999 | 0.99 | 0.42 | -999 |
| 5 | 46.09 | -21.17 | 0.13 | 1.80 | 0.66 | -999 |
| 5 | 46.17 | -21.46 | -999 | 1.15 | 0.78 | -999 |
| 5 | 46.25 | -21.44 | 0.17 | 1.44 | 0.87 | -999 |
| 5 | 46.23 | -21.41 | -999 | 0.99 | 0.61 | -999 |
| 5 | 46.24 | -21.39 | 0.16 | 1.30 | 0.68 | -999 |
| 5 | 46.13 | -21.52 | -999 | 1.16 | 0.52 | -999 |
| 5 | 46.22 | -21.46 | 0.19 | 1.22 | 0.76 | -999 |
| 5 | 46.24 | -21.47 | -999 | 1.06 | 0.40 | -999 |
| 5 | 46.23 | -21.45 | -999 | 1.12 | 0.45 | -999 |
| 5 | 46.32 | -21.46 | -999 | 0.90 | 0.40 | -999 |
| 5 | 46.22 | -21.46 | 0.12 | 1.13 | 0.59 | -999 |
| 5 | 46.06 | -21.33 | 0.12 | 0.95 | 0.44 | -999 |

|   |       |        |      |      |      |      |
|---|-------|--------|------|------|------|------|
| 5 | 46.10 | -21.33 | 0.22 | 1.25 | 0.56 | -999 |
| 5 | 46.15 | -21.41 | 0.23 | 1.19 | 0.41 | -999 |
| 5 | 46.18 | -21.46 | 0.49 | 1.43 | 0.67 | -999 |
| 5 | 46.24 | -21.55 | -999 | 1.19 | 0.52 | -999 |
| 5 | 46.31 | -21.56 | 0.25 | 1.90 | 0.65 | -999 |
| 5 | 46.24 | -21.50 | -999 | 1.01 | 0.50 | -999 |
| 5 | 46.26 | -21.36 | 0.30 | 1.48 | 0.69 | -999 |
| 5 | 46.26 | -21.34 | 0.12 | 1.83 | 0.71 | -999 |
| 5 | 46.24 | -21.36 | 0.23 | 1.43 | 1.03 | -999 |
| 5 | 46.33 | -21.29 | 0.30 | 1.55 | 0.88 | -999 |
| 5 | 46.31 | -21.31 | 0.36 | 1.92 | 1.13 | -999 |
| 5 | 46.33 | -21.27 | 0.16 | 1.02 | 0.77 | -999 |
| 5 | 46.31 | -21.23 | 0.30 | 1.93 | 0.95 | -999 |
| 5 | 46.27 | -21.14 | 0.17 | 1.19 | 0.96 | -999 |
| 5 | 46.24 | -21.10 | 0.29 | 1.89 | 1.01 | -999 |
| 5 | 46.20 | -21.04 | 0.28 | 1.27 | 0.87 | -999 |
| 5 | 46.22 | -21.04 | 0.31 | 1.37 | 1.05 | -999 |
| 5 | 46.29 | -21.08 | 0.27 | 1.64 | 0.91 | -999 |
| 5 | 46.27 | -21.04 | 0.37 | 1.46 | 0.98 | -999 |
| 5 | 46.30 | -21.07 | 0.31 | 1.33 | 0.65 | -999 |
| 5 | 46.30 | -21.05 | 0.40 | 1.72 | 0.94 | -999 |
| 5 | 46.39 | -21.00 | 0.32 | 2.19 | 0.98 | -999 |
| 5 | 46.35 | -20.93 | 0.41 | 1.26 | 1.14 | -999 |
| 5 | 46.25 | -20.81 | 0.32 | 1.41 | 0.73 | -999 |
| 5 | 46.20 | -20.78 | 0.57 | 1.50 | 0.96 | -999 |
| 5 | 46.27 | -20.87 | 0.27 | 1.50 | 0.71 | -999 |
| 5 | 46.24 | -20.86 | 0.40 | 1.43 | 0.90 | -999 |
| 5 | 46.18 | -20.85 | 0.42 | 2.00 | 0.71 | -999 |
| 5 | 46.18 | -20.87 | 0.46 | 1.71 | 0.85 | -999 |
| 5 | 46.23 | -20.90 | 0.43 | 1.16 | 0.83 | -999 |
| 5 | 46.18 | -20.89 | 0.54 | 1.89 | 0.70 | -999 |
| 5 | 46.21 | -20.89 | 0.32 | 1.46 | 0.67 | -999 |
| 5 | 46.22 | -20.88 | 0.55 | 2.06 | 0.84 | -999 |
| 5 | 46.14 | -20.85 | 0.45 | 1.27 | 0.75 | -999 |
| 5 | 46.21 | -20.82 | 0.31 | 1.41 | 0.88 | -999 |
| 5 | 46.16 | -20.81 | 0.46 | 1.78 | 0.93 | -999 |
| 5 | 46.21 | -20.78 | 0.38 | 1.86 | 1.15 | -999 |
| 5 | 46.16 | -20.78 | 0.25 | 1.03 | 0.55 | -999 |
| 5 | 46.18 | -20.75 | 0.35 | 0.97 | 0.65 | -999 |
| 5 | 46.22 | -20.72 | 0.21 | 1.66 | 0.57 | -999 |
| 5 | 46.10 | -20.71 | 0.30 | 2.09 | 0.81 | -999 |
| 5 | 46.12 | -20.68 | 0.26 | 1.75 | 0.82 | -999 |
| 5 | 46.11 | -20.66 | 0.60 | 1.77 | 0.80 | -999 |
| 5 | 46.06 | -20.66 | 0.21 | 1.65 | 0.65 | -999 |
| 5 | 46.09 | -20.69 | 0.43 | 1.30 | 0.65 | -999 |
| 5 | 46.04 | -20.73 | 0.30 | 1.23 | 0.36 | -999 |
| 5 | 46.04 | -20.71 | 0.55 | 1.31 | 0.50 | -999 |



|   |       |        |      |      |      |      |
|---|-------|--------|------|------|------|------|
| 5 | 46.06 | -20.75 | 0.32 | 0.96 | 0.36 | -999 |
| 5 | 46.05 | -20.74 | 0.47 | 1.18 | 0.51 | -999 |
| 5 | 46.05 | -20.26 | 0.65 | 1.19 | 0.36 | -999 |
| 5 | 46.08 | -20.28 | 0.41 | 1.85 | 0.49 | -999 |
| 5 | 46.12 | -20.33 | 0.51 | 1.04 | 0.35 | -999 |
| 5 | 46.13 | -20.37 | 0.39 | 1.78 | 0.54 | -999 |
| 5 | 46.16 | -20.45 | 0.64 | 1.63 | 0.53 | -999 |
| 5 | 46.07 | -20.55 | 0.51 | 1.62 | 0.71 | -999 |
| 5 | 46.00 | -20.79 | 0.41 | 1.41 | 0.59 | -999 |
| 5 | 46.00 | -20.93 | 0.53 | 1.50 | 0.59 | -999 |
| 5 | 46.00 | -21.00 | 0.82 | 1.21 | 0.41 | -999 |
| 5 | 45.94 | -20.91 | 0.56 | 1.29 | 0.53 | -999 |
| 5 | 46.02 | -20.90 | 0.31 | 1.45 | 0.41 | -999 |
| 5 | 46.08 | -20.92 | 0.65 | 1.68 | 0.49 | -999 |
| 5 | 46.07 | -20.92 | 0.35 | 1.93 | 0.26 | -999 |
| 5 | 45.96 | -20.83 | 0.65 | 1.33 | 0.43 | -999 |
| 5 | 45.98 | -20.85 | 0.41 | 1.78 | 0.34 | -999 |
| 5 | 45.94 | -20.89 | 0.71 | 2.54 | 0.57 | -999 |
| 5 | 45.96 | -20.91 | 0.56 | 1.18 | 0.37 | -999 |
| 5 | 45.94 | -20.91 | 0.75 | 1.35 | 0.61 | -999 |
| 5 | 45.96 | -20.94 | 0.32 | 1.03 | 0.56 | -999 |
| 5 | 45.99 | -20.96 | 0.38 | 1.14 | 1.13 | -999 |
| 5 | 45.98 | -21.01 | 0.42 | 1.82 | 1.61 | -999 |
| 5 | 46.02 | -21.01 | 0.34 | 1.55 | 1.85 | -999 |
| 5 | 46.08 | -21.03 | 0.55 | 1.39 | 1.78 | -999 |
| 5 | 46.09 | -21.04 | 0.49 | 1.47 | 1.99 | -999 |
| 5 | 45.97 | -21.07 | 0.38 | 1.57 | 1.37 | -999 |
| 5 | 46.11 | -21.07 | 0.53 | 1.94 | 1.61 | -999 |
| 5 | 45.99 | -21.09 | 0.47 | 1.30 | 1.02 | -999 |
| 5 | 46.00 | -21.11 | 0.45 | 1.67 | 1.18 | -999 |
| 5 | 46.14 | -21.02 | 0.30 | 1.40 | 0.85 | -999 |
| 5 | 46.11 | -21.07 | 0.50 | 1.60 | 1.39 | -999 |
| 5 | 46.10 | -21.12 | 0.50 | 2.07 | 1.54 | -999 |
| 5 | 46.13 | -21.01 | 0.59 | 1.99 | 2.03 | -999 |
| 5 | 46.02 | -21.08 | 0.46 | 1.51 | 1.54 | -999 |
| 5 | 45.99 | -21.04 | 0.35 | 1.24 | 1.57 | -999 |
| 5 | 45.98 | -21.10 | 0.31 | 1.44 | 1.15 | -999 |
| 5 | 46.01 | -21.08 | 0.62 | 1.89 | 1.52 | -999 |
| 5 | 46.11 | -20.97 | 0.51 | 1.27 | 1.38 | -999 |
| 5 | 46.10 | -20.99 | 0.29 | 0.78 | 1.27 | -999 |
| 5 | 46.01 | -21.07 | 0.31 | -999 | 0.94 | -999 |
| 5 | 46.06 | -20.98 | 0.46 | -999 | 1.13 | -999 |
| 5 | 46.10 | -20.87 | 0.41 | 1.60 | 1.07 | -999 |
| 5 | 46.03 | -20.96 | 0.47 | 1.76 | 1.19 | -999 |
| 5 | 45.90 | -21.09 | 0.49 | 1.94 | 1.30 | -999 |
| 5 | 46.03 | -20.93 | 0.65 | 1.56 | 0.93 | -999 |
| 5 | 46.06 | -20.95 | 0.32 | 0.99 | 0.59 | -999 |

|   |       |        |      |      |      |      |
|---|-------|--------|------|------|------|------|
| 5 | 46.01 | -21.02 | 0.48 | 2.19 | 0.80 | -999 |
| 5 | 46.11 | -20.99 | 0.41 | 0.90 | 0.61 | -999 |
| 5 | 46.18 | -20.98 | 0.28 | 1.52 | 0.87 | -999 |
| 5 | 46.19 | -20.95 | 0.47 | 1.74 | 0.76 | -999 |
| 5 | 46.16 | -20.83 | 0.52 | 1.84 | 0.95 | -999 |
| 5 | 46.16 | -21.02 | 0.40 | 1.42 | 0.66 | -999 |
| 5 | 46.05 | -20.88 | 0.58 | 1.12 | 1.01 | -999 |
| 5 | 46.03 | -21.03 | 0.30 | 1.31 | 0.56 | -999 |
| 5 | 46.03 | -21.13 | 0.53 | 0.88 | 0.78 | -999 |
| 5 | 46.02 | -21.03 | 0.45 | 2.16 | 0.53 | -999 |
| 5 | 46.03 | -20.98 | 0.51 | 1.25 | 0.83 | -999 |
| 5 | 46.05 | -20.93 | 0.25 | 0.90 | 0.68 | -999 |
| 5 | 46.05 | -20.95 | 0.49 | 1.57 | 0.69 | -999 |
| 5 | 46.07 | -20.92 | 0.36 | 1.24 | 0.56 | -999 |
| 5 | 46.07 | -20.98 | 0.38 | 1.25 | 0.65 | -999 |
| 5 | 46.09 | -20.88 | 0.33 | 0.72 | 0.51 | -999 |
| 5 | 46.00 | -20.89 | 0.49 | 1.35 | 0.61 | -999 |
| 5 | 45.89 | -21.13 | 0.33 | 0.88 | 0.33 | -999 |
| 5 | 45.92 | -21.14 | 0.38 | 0.79 | 0.57 | -999 |
| 5 | 46.04 | -21.11 | 0.40 | 1.11 | 0.30 | -999 |
| 5 | 46.07 | -21.10 | 0.44 | 1.75 | 0.49 | -999 |
| 5 | 46.16 | -21.08 | 0.31 | 1.35 | 0.43 | -999 |
| 5 | 46.20 | -21.08 | 0.46 | 1.12 | 0.55 | -999 |
| 5 | 46.16 | -21.08 | 0.35 | 1.77 | 0.32 | -999 |
| 5 | 46.19 | -21.04 | 0.39 | 0.81 | 0.42 | -999 |
| 5 | 46.22 | -21.06 | 0.39 | 1.62 | 0.37 | -999 |
| 5 | 46.18 | -21.06 | 0.39 | 1.94 | 0.69 | -999 |
| 5 | 46.23 | -21.03 | 0.35 | 1.78 | 0.40 | -999 |
| 5 | 46.21 | -21.03 | 0.39 | 1.55 | 0.55 | -999 |
| 5 | 46.17 | -21.13 | 0.32 | 1.66 | 0.38 | -999 |
| 5 | 46.29 | -20.94 | 0.38 | 1.82 | 0.66 | -999 |
| 5 | 46.25 | -20.99 | 0.34 | 1.25 | 0.50 | -999 |
| 5 | 46.24 | -21.02 | 0.48 | 1.34 | 0.86 | -999 |
| 5 | 46.19 | -21.10 | 0.35 | 1.68 | 0.59 | -999 |
| 5 | 46.18 | -21.13 | 0.41 | 1.60 | 1.08 | -999 |
| 5 | 46.14 | -21.17 | 0.29 | 1.69 | 1.03 | -999 |
| 5 | 46.23 | -21.07 | 0.56 | 1.86 | 1.40 | -999 |
| 5 | 46.24 | -20.94 | 0.53 | 1.44 | 1.43 | -999 |
| 5 | 46.32 | -20.81 | 0.43 | 1.54 | 2.07 | -999 |
| 5 | 46.30 | -20.74 | 0.30 | 1.47 | 1.62 | -999 |
| 5 | 46.32 | -20.71 | 0.36 | 1.74 | 1.77 | -999 |
| 5 | 46.30 | -20.77 | 0.40 | 1.39 | 1.51 | -999 |
| 5 | 46.31 | -20.80 | 1.00 | 1.40 | 1.58 | -999 |
| 5 | 46.23 | -20.71 | 0.34 | 1.49 | 1.35 | -999 |
| 5 | 46.19 | -20.74 | 0.42 | 1.23 | 1.53 | -999 |
| 5 | 46.13 | -20.79 | 0.33 | 1.15 | 1.32 | -999 |
| 5 | 46.21 | -20.77 | 0.43 | 0.53 | 1.48 | -999 |

|   |       |        |      |      |      |      |
|---|-------|--------|------|------|------|------|
| 5 | 46.26 | -20.68 | 0.33 | 1.69 | 1.08 | -999 |
| 5 | 46.26 | -20.52 | 0.41 | 1.51 | 1.07 | -999 |
| 5 | 46.24 | -20.55 | 0.39 | 1.33 | 0.68 | -999 |
| 5 | 46.22 | -20.47 | 0.43 | 1.51 | 1.04 | -999 |
| 5 | 46.17 | -20.40 | 0.31 | 1.17 | 0.72 | -999 |
| 5 | 46.16 | -20.41 | 0.49 | 1.89 | 0.87 | -999 |
| 5 | 46.14 | -20.43 | 0.39 | 1.08 | 0.59 | -999 |
| 5 | 46.13 | -20.44 | 0.64 | 1.35 | 0.73 | -999 |
| 5 | 46.12 | -20.44 | 0.41 | 1.35 | 0.57 | -999 |
| 5 | 46.12 | -20.43 | 0.45 | 1.44 | 0.65 | -999 |
| 5 | 46.10 | -20.40 | 0.35 | 1.36 | 0.62 | -999 |
| 5 | 46.10 | -20.39 | 0.50 | 1.63 | 0.86 | -999 |
| 5 | 46.08 | -20.38 | 0.36 | 1.46 | 0.76 | -999 |
| 5 | 46.07 | -20.41 | 0.36 | 1.09 | 0.73 | -999 |
| 5 | 46.04 | -20.49 | 0.38 | 1.57 | 0.50 | -999 |
| 5 | 46.03 | -20.55 | 0.34 | 0.74 | 0.63 | -999 |
| 5 | 46.05 | -20.66 | 0.28 | 0.93 | 0.50 | -999 |
| 5 | 46.07 | -20.69 | 0.34 | 1.21 | 0.60 | -999 |
| 5 | 46.14 | -20.71 | 0.26 | 1.32 | 0.61 | -999 |
| 5 | 46.15 | -20.70 | 0.28 | 1.60 | 0.71 | -999 |
| 5 | 46.01 | -20.61 | 0.37 | 1.42 | 0.55 | -999 |
| 5 | 45.99 | -20.57 | 0.37 | 1.62 | 0.54 | -999 |
| 5 | 46.10 | -20.63 | 0.35 | -999 | 0.40 | -999 |
| 5 | 46.12 | -20.67 | 0.49 | 0.87 | 0.59 | -999 |
| 5 | 46.11 | -20.73 | 0.27 | 1.26 | 0.49 | -999 |
| 5 | 46.08 | -20.71 | 0.38 | 0.97 | 0.73 | -999 |
| 5 | 46.06 | -20.40 | 0.20 | -999 | 0.44 | -999 |
| 5 | 46.06 | -20.47 | 0.33 | 1.55 | 0.48 | -999 |
| 5 | 46.05 | -20.48 | 0.36 | 1.57 | 0.34 | -999 |
| 5 | 46.03 | -20.51 | 0.54 | 1.57 | 0.59 | -999 |
| 5 | 45.98 | -20.57 | 0.27 | -999 | 0.59 | -999 |
| 5 | 45.97 | -20.57 | 0.36 | 1.78 | 0.93 | -999 |
| 5 | 45.91 | -20.70 | 0.27 | 1.19 | 0.47 | -999 |
| 5 | 45.88 | -20.78 | 0.39 | 1.39 | 0.67 | -999 |
| 5 | 46.01 | -20.56 | 0.34 | 1.19 | 0.65 | -999 |
| 5 | 46.00 | -20.60 | 0.36 | 1.79 | 0.91 | -999 |
| 5 | 45.98 | -20.63 | 0.39 | 0.70 | 0.69 | -999 |
| 5 | 45.96 | -20.63 | 0.37 | 1.19 | 1.04 | -999 |
| 5 | 46.02 | -20.61 | 0.32 | 1.30 | 0.64 | -999 |
| 5 | 46.09 | -20.62 | 0.28 | 1.41 | 1.12 | -999 |
| 5 | 45.98 | -20.57 | 0.33 | 1.42 | 0.83 | -999 |
| 5 | 45.93 | -20.56 | 0.30 | 1.63 | 1.18 | -999 |
| 5 | 45.88 | -20.57 | 0.30 | 0.92 | 1.16 | -999 |
| 5 | 45.98 | -20.60 | 0.42 | 1.54 | 1.27 | -999 |
| 5 | 46.01 | -20.65 | -999 | -999 | 1.18 | -999 |
| 5 | 46.10 | -20.66 | 0.40 | 1.86 | 1.61 | -999 |
| 5 | 46.03 | -20.68 | 0.41 | 1.97 | 1.36 | -999 |

|   |       |        |      |      |      |      |
|---|-------|--------|------|------|------|------|
| 5 | 46.01 | -20.68 | 0.74 | 1.87 | 1.51 | -999 |
| 5 | 45.97 | -20.68 | 0.53 | 0.94 | 1.03 | -999 |
| 5 | 46.03 | -20.63 | 0.62 | 1.57 | 1.31 | -999 |
| 5 | 46.04 | -20.64 | 0.44 | 1.16 | 1.13 | -999 |
| 5 | 46.06 | -20.61 | 0.63 | 1.59 | 1.33 | -999 |
| 5 | 45.98 | -20.71 | 0.51 | -999 | 1.36 | -999 |
| 5 | 46.02 | -20.67 | 0.68 | 1.05 | 1.71 | -999 |
| 5 | 46.00 | -20.68 | 0.36 | 1.56 | 1.46 | -999 |
| 5 | 45.98 | -20.70 | 0.41 | 1.25 | 1.58 | -999 |
| 5 | 46.06 | -20.56 | 0.41 | 1.05 | 1.38 | -999 |
| 5 | 46.06 | -20.53 | 0.62 | 1.78 | 1.70 | -999 |
| 5 | 46.00 | -20.57 | 0.39 | 1.47 | 1.22 | -999 |
| 5 | 46.09 | -20.47 | -999 | 1.21 | 1.47 | -999 |
| 5 | 45.98 | -20.58 | 0.34 | 1.38 | 1.00 | -999 |
| 5 | 45.98 | -20.60 | 0.42 | 1.49 | 1.34 | -999 |
| 5 | 45.96 | -20.64 | 0.37 | 0.97 | 1.06 | -999 |
| 5 | 45.95 | -20.68 | 0.42 | 1.41 | 1.99 | -999 |
| 5 | 45.98 | -20.71 | 0.33 | 1.55 | 1.68 | -999 |
| 5 | 45.98 | -20.71 | 0.43 | 0.86 | 2.12 | -999 |
| 5 | 45.98 | -20.71 | 0.30 | 0.65 | 0.96 | -999 |
| 5 | 45.99 | -20.80 | 0.33 | -999 | 0.87 | -999 |
| 5 | 45.98 | -20.70 | -999 | 1.33 | 0.61 | -999 |
| 5 | 45.98 | -20.56 | 0.31 | -999 | 0.81 | -999 |
| 5 | 45.98 | -20.57 | 0.26 | -999 | 0.81 | -999 |
| 5 | 46.07 | -20.47 | 0.34 | 1.24 | 0.95 | -999 |
| 5 | 46.03 | -20.52 | 0.39 | 1.12 | 0.54 | -999 |
| 5 | 45.97 | -20.46 | 0.44 | 1.79 | 0.85 | -999 |
| 5 | 45.85 | -20.35 | 0.31 | 1.12 | 0.95 | -999 |
| 5 | 45.76 | -20.39 | 0.28 | -999 | 1.39 | -999 |
| 5 | 45.76 | -20.36 | 0.36 | 1.23 | 0.76 | -999 |
| 5 | 45.93 | -20.46 | 0.39 | 0.68 | 1.20 | -999 |
| 5 | 45.96 | -20.65 | 0.24 | 0.92 | 0.94 | -999 |
| 5 | 45.93 | -20.71 | 0.34 | 1.14 | 1.01 | -999 |
| 5 | 45.90 | -20.84 | -999 | 0.68 | 0.98 | -999 |
| 5 | 45.94 | -20.72 | 0.29 | 1.47 | 1.15 | -999 |
| 5 | 45.99 | -20.65 | -999 | 1.03 | 0.85 | -999 |
| 5 | 46.00 | -20.48 | 0.37 | -999 | 0.99 | -999 |
| 5 | 46.04 | -20.21 | -999 | 0.93 | 1.00 | -999 |
| 5 | 45.97 | -20.34 | 0.27 | 1.16 | 1.16 | -999 |
| 5 | 46.04 | -20.13 | 0.30 | 1.17 | 0.85 | -999 |
| 5 | 46.02 | -20.00 | 0.49 | -999 | 1.15 | -999 |
| 5 | 46.05 | -19.99 | -999 | -999 | 0.92 | -999 |
| 5 | 46.09 | -20.08 | 0.46 | 1.43 | 1.16 | -999 |
| 5 | 46.06 | -20.25 | 0.39 | -999 | 0.66 | -999 |
| 5 | 46.05 | -20.34 | 0.49 | 1.43 | 0.84 | -999 |
| 5 | 45.99 | -20.52 | -999 | 1.43 | 0.62 | -999 |
| 5 | 45.97 | -20.62 | 0.36 | 1.80 | 0.85 | -999 |

|   |       |        |      |      |      |      |
|---|-------|--------|------|------|------|------|
| 5 | 45.99 | -20.63 | -999 | -999 | 0.60 | -999 |
| 5 | 45.99 | -20.63 | 0.42 | 1.09 | 0.97 | -999 |
| 5 | 45.76 | -20.63 | 0.25 | 1.21 | 0.88 | -999 |
| 5 | 45.71 | -20.66 | 0.45 | 1.46 | 1.13 | -999 |
| 5 | 45.92 | -20.65 | -999 | -999 | 0.58 | -999 |
| 5 | 45.87 | -20.67 | 0.25 | -999 | 0.78 | -999 |
| 5 | 45.86 | -20.70 | 0.40 | 1.48 | 0.51 | -999 |
| 5 | 45.87 | -20.72 | 0.28 | -999 | 0.49 | -999 |
| 5 | 45.88 | -20.71 | 0.26 | 1.24 | 0.46 | -999 |
| 5 | 45.95 | -20.59 | 0.26 | 0.87 | 0.43 | -999 |
| 5 | 45.96 | -20.73 | 0.28 | 0.99 | 0.43 | -999 |
| 5 | 46.05 | -20.75 | 0.40 | -999 | 0.56 | -999 |
| 5 | 45.96 | -20.78 | -999 | 1.48 | 0.35 | -999 |
| 5 | 45.95 | -20.77 | 0.31 | 1.11 | 0.69 | -999 |
| 5 | 45.94 | -20.82 | -999 | 0.86 | 0.54 | -999 |
| 5 | 45.96 | -20.84 | 0.28 | 1.48 | 1.01 | -999 |
| 5 | 46.00 | -20.85 | 0.34 | 1.61 | -999 | -999 |
| 5 | 46.02 | -20.84 | 0.37 | 1.36 | 1.08 | -999 |
| 5 | 46.03 | -20.80 | 0.31 | -999 | 0.82 | -999 |
| 5 | 46.03 | -20.77 | 0.28 | 0.74 | 1.30 | -999 |
| 5 | 46.01 | -20.75 | 0.37 | -999 | 1.14 | -999 |
| 5 | 46.01 | -20.73 | 0.37 | -999 | 1.45 | -999 |
| 5 | 46.00 | -20.75 | 0.37 | -999 | 1.17 | -999 |
| 5 | 45.99 | -20.76 | 0.40 | 1.49 | 1.78 | -999 |
| 5 | 45.98 | -20.78 | 0.38 | 1.64 | 1.19 | -999 |
| 5 | 45.97 | -20.80 | 0.46 | 1.63 | 1.78 | -999 |
| 5 | 46.00 | -20.83 | 0.49 | -999 | 1.92 | -999 |
| 5 | 46.04 | -20.81 | 0.60 | 1.50 | 1.91 | -999 |
| 5 | 46.03 | -20.79 | 0.49 | -999 | 1.61 | -999 |
| 5 | 46.00 | -20.82 | 0.61 | -999 | 1.87 | -999 |
| 5 | 45.95 | -20.87 | 0.46 | 0.88 | 1.56 | -999 |
| 5 | 45.95 | -20.86 | 0.52 | -999 | 1.83 | -999 |
| 5 | 45.93 | -20.91 | 0.47 | 1.14 | 1.24 | -999 |
| 5 | 45.94 | -20.92 | 0.59 | -999 | 1.48 | -999 |
| 5 | 45.95 | -20.96 | 0.54 | -999 | 1.42 | -999 |
| 5 | 45.95 | -20.98 | 0.34 | 1.59 | 2.85 | -999 |
| 5 | 45.90 | -21.00 | 0.53 | 0.75 | 2.11 | -999 |
| 5 | 45.94 | -20.90 | 0.62 | 1.12 | 1.66 | -999 |
| 5 | 46.12 | -20.58 | 0.28 | 1.02 | 1.32 | -999 |
| 5 | 46.04 | -20.64 | 0.30 | 0.84 | 1.67 | -999 |
| 5 | 45.99 | -20.68 | 0.26 | 1.22 | 1.42 | -999 |
| 5 | 45.87 | -20.78 | 0.58 | 1.03 | 1.57 | -999 |
| 5 | 45.80 | -20.57 | 0.41 | -999 | 0.88 | -999 |
| 5 | 45.52 | -20.53 | 0.58 | 1.13 | 1.31 | -999 |
| 5 | 44.96 | -20.48 | 0.24 | 1.03 | 0.80 | -999 |
| 5 | 44.67 | -20.45 | 0.58 | 1.31 | 1.13 | -999 |
| 5 | 44.12 | -20.42 | 0.39 | 1.31 | 0.51 | -999 |

|   |       |        |      |      |      |      |
|---|-------|--------|------|------|------|------|
| 5 | 43.85 | -20.39 | 0.37 | -999 | 0.75 | -999 |
| 5 | 43.28 | -20.33 | 0.26 | -999 | 0.78 | -999 |
| 5 | 43.00 | -20.29 | 0.46 | -999 | 1.06 | -999 |
| 5 | 42.46 | -20.24 | 0.42 | -999 | 0.67 | -999 |
| 5 | 42.18 | -20.22 | 0.29 | 1.25 | 0.57 | -999 |
| 5 | 41.64 | -20.16 | 0.29 | -999 | 0.53 | -999 |
| 5 | 41.36 | -20.13 | 0.58 | -999 | 0.62 | -999 |
| 5 | 40.81 | -20.09 | 0.27 | -999 | 0.57 | -999 |
| 5 | 40.53 | -20.07 | 0.47 | -999 | 0.56 | -999 |
| 5 | 39.98 | -20.02 | 0.38 | -999 | 0.55 | -999 |
| 5 | 39.89 | -20.01 | 0.25 | -999 | 0.69 | -999 |
| 5 | 39.86 | -20.37 | 0.46 | 0.90 | 0.41 | -999 |
| 5 | 39.88 | -20.69 | 0.23 | -999 | 0.71 | -999 |
| 5 | 39.90 | -21.25 | 0.25 | -999 | 0.70 | -999 |
| 5 | 39.92 | -21.55 | 0.28 | -999 | 0.61 | -999 |
| 5 | 39.97 | -22.87 | -999 | -999 | 0.90 | -999 |
| 5 | 39.98 | -23.12 | 0    | -999 | 0.58 | -999 |
| 5 | 40.00 | -23.59 | 0.26 | -999 | 0.28 | -999 |
| 5 | 40.01 | -23.82 | -999 | -999 | 0.35 | -999 |
| 5 | 40.02 | -24.11 | 0.38 | -999 | 0.42 | -999 |
| 5 | 40.03 | -24.24 | 0.35 | -999 | 0.57 | -999 |
| 5 | 40.05 | -24.70 | -999 | -999 | 0.93 | -999 |
| 5 | 40.05 | -24.92 | -999 | -999 | 1.25 | -999 |
| 5 | 39.69 | -25.11 | -999 | -999 | 1.17 | -999 |
| 5 | 39.41 | -25.24 | -999 | 1.02 | 1.21 | -999 |
| 5 | 38.85 | -25.52 | 0.35 | 1.41 | 0.88 | -999 |
| 5 | 38.56 | -25.64 | 0.38 | -999 | 0.55 | -999 |
| 5 | 37.99 | -25.88 | 0.39 | -999 | 0.35 | -999 |
| 5 | 37.76 | -25.81 | -999 | -999 | 0.47 | -999 |
| 5 | 38.45 | -27.14 | -999 | -999 | 0.50 | -999 |
| 5 | 38.61 | -27.42 | 0.44 | -999 | 0.55 | -999 |
| 5 | 38.95 | -28.03 | 0.52 | -999 | 0.53 | -999 |
| 5 | 39.12 | -28.32 | 0.89 | -999 | 0.51 | -999 |
| 5 | 39.46 | -28.92 | 0.65 | -999 | 0.43 | -999 |
| 5 | 39.62 | -29.24 | 0.74 | -999 | 0.66 | -999 |
| 5 | 39.96 | -29.82 | 0.26 | -999 | 0.61 | -999 |
| 5 | 40.05 | -30.16 | 0.26 | -999 | 0.77 | -999 |
| 5 | 40.02 | -30.88 | 0.18 | -999 | 0.89 | -999 |
| 5 | 40.00 | -31.26 | 0.34 | -999 | 0.85 | -999 |
| 5 | 39.96 | -32.02 | 0.12 | -999 | 0.59 | -999 |
| 5 | 39.95 | -32.39 | 0.13 | -999 | 0.91 | -999 |
| 5 | 39.92 | -33.10 | -999 | -999 | 0.80 | -999 |
| 5 | 39.90 | -33.48 | 0.12 | -999 | 0.73 | -999 |
| 5 | 39.88 | -34.26 | -999 | -999 | 0.72 | -999 |
| 5 | 39.86 | -34.65 | -999 | -999 | 0.76 | -999 |
| 5 | 39.83 | -35.17 | -999 | -999 | 0.75 | -999 |
| 5 | 39.81 | -35.33 | -999 | -999 | 1.03 | -999 |

|   |       |        |      |      |      |      |
|---|-------|--------|------|------|------|------|
| 5 | 39.75 | -36.03 | -999 | -999 | 0.94 | -999 |
| 5 | 39.72 | -36.41 | -999 | -999 | 0.89 | -999 |
| 5 | 39.65 | -37.10 | -999 | -999 | 0.76 | -999 |
| 5 | 39.63 | -37.48 | 0.12 | 0.37 | 0.82 | -999 |
| 5 | 39.57 | -38.21 | -999 | -999 | 0.76 | -999 |
| 5 | 39.53 | -38.57 | -999 | -999 | 0.94 | -999 |
| 5 | 39.47 | -39.26 | 0.17 | 0.23 | 0.86 | -999 |
| 5 | 39.45 | -39.53 | -999 | -999 | 1.09 | -999 |
| 5 | 39.37 | -40.26 | -999 | -999 | 0.67 | -999 |
| 5 | 39.32 | -40.61 | 0.16 | -999 | 0.84 | -999 |
| 5 | 39.24 | -41.30 | -999 | -999 | 0.67 | -999 |
| 5 | 39.20 | -41.64 | 0.14 | -999 | 0.59 | -999 |
| 5 | 39.11 | -42.28 | 0.10 | -999 | 0.55 | -999 |
| 5 | 39.07 | -42.60 | 0.12 | -999 | 0.67 | -999 |
| 5 | 39.03 | -42.91 | 0.12 | -999 | 0.46 | -999 |
| 5 | 38.97 | -43.27 | -999 | -999 | 0.63 | -999 |
| 5 | 38.89 | -43.99 | 0.09 | -999 | 0.43 | -999 |
| 5 | 38.84 | -44.35 | 0.09 | -999 | 0.48 | -999 |
| 5 | 38.74 | -45.06 | 0.10 | -999 | 0.37 | -999 |
| 5 | 38.68 | -45.42 | 0.10 | -999 | 0.41 | -999 |
| 5 | 38.55 | -46.10 | 0.15 | -999 | 0.42 | -999 |
| 5 | 38.49 | -46.46 | 0.15 | -999 | 0.47 | -999 |
| 5 | 38.37 | -47.21 | 0.08 | -999 | 0.38 | -999 |
| 5 | 38.29 | -47.57 | 0.15 | -999 | 0.65 | -999 |
| 5 | 38.16 | -48.29 | -999 | -999 | 0.66 | -999 |
| 5 | 38.10 | -48.65 | 0.15 | -999 | 0.48 | -999 |
| 5 | 37.98 | -49.34 | 0.19 | 0.24 | 0.68 | -999 |
| 5 | 37.92 | -49.68 | -999 | -999 | 0.90 | -999 |
| 5 | 37.78 | -50.34 | -999 | -999 | 0.78 | -999 |
| 5 | 37.71 | -50.69 | 0.09 | -999 | 0.98 | -999 |
| 5 | 37.55 | -51.39 | -999 | -999 | 0.78 | -999 |
| 5 | 37.47 | -51.75 | -999 | -999 | 1.27 | -999 |
| 5 | 37.31 | -52.44 | -999 | -999 | 1.12 | -999 |
| 5 | 37.24 | -52.77 | -999 | 0.32 | 1.32 | -999 |
| 5 | 37.08 | -53.49 | -999 | -999 | 1.19 | -999 |
| 5 | 37.00 | -53.85 | 0.16 | -999 | 1.23 | -999 |
| 5 | 36.83 | -54.57 | 0.11 | -999 | 1.13 | -999 |
| 5 | 36.75 | -54.92 | -999 | 0.35 | 1.07 | -999 |
| 5 | 36.58 | -55.57 | -999 | -999 | 0.73 | -999 |
| 5 | 36.49 | -55.89 | 0.16 | -999 | 0.86 | -999 |
| 5 | 36.31 | -56.55 | -999 | -999 | 0.97 | -999 |
| 5 | 36.22 | -56.88 | -999 | -999 | 0.95 | -999 |
| 5 | 36.10 | -57.33 | -999 | -999 | 0.83 | -999 |
| 5 | 36.00 | -57.67 | 0.15 | -999 | 0.85 | -999 |
| 5 | 35.80 | -58.38 | 0.18 | -999 | 0.72 | -999 |
| 5 | 35.71 | -58.74 | -999 | -999 | 0.75 | -999 |
| 5 | 35.52 | -59.42 | 0.13 | -999 | 0.63 | -999 |

|   |       |        |      |      |      |      |
|---|-------|--------|------|------|------|------|
| 5 | 35.42 | -59.76 | 0.19 | -999 | 0.65 | -999 |
| 5 | 35.22 | -60.42 | 0.11 | -999 | 0.61 | -999 |
| 5 | 35.12 | -60.74 | 0.26 | -999 | 0.94 | -999 |
| 5 | 34.91 | -61.37 | -999 | -999 | 0.88 | -999 |
| 5 | 34.81 | -61.68 | 0.21 | -999 | 0.92 | -999 |
| 5 | 34.61 | -62.29 | -999 | -999 | 0.91 | -999 |
| 5 | 34.50 | -62.61 | -999 | -999 | 0.98 | -999 |
| 5 | 34.29 | -63.26 | -999 | -999 | 0.83 | -999 |
| 5 | 34.19 | -63.58 | 0.15 | -999 | 1.02 | -999 |
| 5 | 33.97 | -64.22 | -999 | -999 | 0.80 | -999 |
| 5 | 33.87 | -64.54 | 0.16 | 0.52 | 1.78 | -999 |
| 5 | 33.66 | -65.16 | -999 | -999 | 0.81 | -999 |
| 5 | 33.56 | -65.41 | 0.18 | -999 | 0.87 | -999 |
| 5 | 33.33 | -66.01 | -999 | -999 | 0.61 | -999 |
| 5 | 33.21 | -66.32 | -999 | -999 | 0.65 | -999 |
| 5 | 32.98 | -66.95 | -999 | -999 | 0.46 | -999 |
| 5 | 32.85 | -67.27 | -999 | -999 | 0.84 | -999 |
| 5 | 32.62 | -67.88 | -999 | -999 | 0.64 | -999 |
| 5 | 32.50 | -68.18 | -999 | -999 | 0.61 | -999 |
| 5 | 32.29 | -68.73 | -999 | -999 | 0.32 | -999 |
| 5 | 32.17 | -69.05 | -999 | -999 | 0.53 | -999 |
| 5 | 31.91 | -69.72 | -999 | -999 | 0.45 | -999 |
| 5 | 31.78 | -70.05 | -999 | -999 | 0.65 | -999 |
| 5 | 31.51 | -70.67 | -999 | -999 | 0.41 | -999 |
| 5 | 31.37 | -70.98 | -999 | -999 | 0.60 | -999 |
| 5 | 31.13 | -71.55 | -999 | -999 | 0.47 | -999 |
| 5 | 30.99 | -71.86 | -999 | -999 | 0.76 | -999 |
| 5 | 30.71 | -72.42 | -999 | 0.47 | 0.88 | -999 |
| 5 | 30.58 | -72.73 | 0.23 | -999 | 1.32 | -999 |
| 5 | 30.34 | -73.34 | -999 | -999 | 1.20 | -999 |
| 5 | 30.21 | -73.62 | 0.15 | -999 | 1.26 | -999 |
| 5 | 29.98 | -74.16 | -999 | -999 | 0.94 | -999 |
| 5 | 29.85 | -74.43 | 0.24 | -999 | 1.08 | -999 |
| 5 | 29.45 | -75.33 | 0.19 | -999 | 0.98 | -999 |
| 5 | 29.15 | -75.93 | -999 | -999 | 0.60 | -999 |
| 5 | 29.01 | -76.21 | 0.26 | -999 | 0.75 | -999 |
| 5 | 28.75 | -76.75 | 0.30 | -999 | 1.22 | -999 |
| 5 | 28.72 | -76.76 | 0.92 | 0.61 | 1.27 | -999 |
| 5 | 28.68 | -76.73 | 0.62 | 1.14 | 1.20 | -999 |
| 5 | 28.67 | -76.71 | 0.92 | 0.91 | 0.95 | -999 |
| 5 | 28.59 | -76.78 | -999 | -999 | 0.50 | -999 |
| 5 | 28.47 | -77.07 | 0.59 | -999 | 0.73 | -999 |
| 5 | 28.21 | -77.66 | 0.63 | -999 | 0.66 | -999 |
| 5 | 28.08 | -77.96 | 0.86 | 0.62 | 0.93 | -999 |
| 5 | 27.82 | -78.55 | 0.67 | 1.07 | 0.62 | -999 |
| 5 | 27.69 | -78.86 | 1.49 | 1.89 | 0.86 | -999 |
| 5 | 27.31 | -79.29 | 0.80 | 0.73 | 0.73 | -999 |



|   |       |        |      |      |      |      |
|---|-------|--------|------|------|------|------|
| 5 | 27.09 | -79.41 | 0.76 | 0.85 | 0.96 | -999 |
| 5 | 26.66 | -79.62 | 0.45 | -999 | 0.78 | -999 |
| 5 | 26.46 | -79.74 | 0.85 | 0.80 | 0.86 | -999 |
| 5 | 26.04 | -79.95 | 0.66 | 0.92 | 0.73 | -999 |
| 5 | 25.82 | -80.04 | 1.40 | 0.53 | 0.56 | -999 |
| 5 | 24.97 | -80.26 | 1.35 | 1.17 | 0.70 | -999 |
| 5 | 24.80 | -80.51 | 4.62 | 2.57 | 1.13 | -999 |
| 5 | 24.50 | -80.99 | 2.03 | 1.75 | 0.75 | -999 |
| 5 | 24.37 | -81.23 | 2.10 | 1.09 | 1.01 | -999 |
| 5 | 24.12 | -81.72 | 0.70 | -999 | 0.48 | -999 |
| 5 | 23.99 | -81.96 | 0.99 | 0.70 | 0.67 | -999 |
| 5 | 23.75 | -82.40 | 0.74 | -999 | 0.51 | -999 |
| 5 | 23.62 | -82.64 | 1.25 | -999 | 0.73 | -999 |
| 5 | 23.35 | -83.17 | 0.83 | -999 | 0.55 | -999 |
| 5 | 23.20 | -83.44 | 1.29 | -999 | 0.63 | -999 |
| 5 | 22.90 | -83.99 | 0.67 | -999 | 0.53 | -999 |
| 5 | 22.75 | -84.25 | 1.28 | -999 | 0.68 | -999 |
| 5 | 22.42 | -84.79 | 0.53 | 0.41 | 0.49 | -999 |
| 5 | 22.18 | -85.01 | 0.89 | -999 | 0.55 | -999 |
| 5 | 21.65 | -85.22 | 0.54 | -999 | 0.41 | -999 |
| 5 | 21.43 | -85.10 | 0.70 | -999 | 0.63 | -999 |
| 5 | 20.97 | -84.69 | 0.67 | -999 | 0.63 | -999 |
| 5 | 20.74 | -84.47 | 1.03 | -999 | 0.75 | -999 |
| 5 | 20.27 | -84.07 | 0.41 | -999 | 0.50 | -999 |
| 5 | 20.04 | -83.90 | 0.76 | -999 | 0.72 | -999 |
| 5 | 19.60 | -83.58 | 1.36 | -999 | 0.52 | -999 |
| 5 | 19.38 | -83.40 | 1.22 | -999 | 0.70 | -999 |
| 5 | 18.97 | -83.09 | 0.40 | -999 | 0.53 | -999 |
| 5 | 18.75 | -82.94 | -999 | -999 | 0.71 | -999 |
| 5 | 18.30 | -82.63 | 0.40 | -999 | 0.48 | -999 |
| 5 | 18.10 | -82.49 | -999 | -999 | 0.61 | -999 |
| 5 | 17.69 | -82.20 | 0.86 | -999 | 0.45 | -999 |
| 5 | 17.47 | -82.03 | -999 | -999 | 0.53 | -999 |
| 5 | 17.05 | -81.71 | -999 | -999 | 0.43 | -999 |
| 5 | 16.85 | -81.56 | -999 | 1.04 | 0.56 | -999 |
| 5 | 16.43 | -81.25 | 1.00 | -999 | 0.58 | -999 |
| 5 | 16.20 | -81.15 | 1.04 | -999 | 0.62 | -999 |
| 5 | 15.70 | -80.99 | 0.37 | -999 | 0.47 | -999 |
| 5 | 15.42 | -80.88 | 0.75 | -999 | 0.75 | -999 |
| 5 | 14.88 | -80.72 | 0.36 | -999 | 0.55 | -999 |
| 5 | 14.60 | -80.63 | 0.83 | -999 | 0.69 | -999 |
| 5 | 14.01 | -80.50 | 0.21 | -999 | 0.52 | -999 |
| 5 | 13.70 | -80.46 | 0.41 | -999 | 0.61 | -999 |
| 5 | 13.09 | -80.39 | 0.36 | -999 | 0.60 | -999 |
| 5 | 12.79 | -80.36 | 0.39 | -999 | 0.69 | -999 |
| 5 | 12.19 | -80.28 | 0.22 | -999 | 0.78 | -999 |
| 5 | 11.89 | -80.24 | 0.26 | -999 | 0.83 | -999 |

|   |       |        |      |      |      |      |
|---|-------|--------|------|------|------|------|
| 5 | 11.26 | -80.15 | 0.21 | -999 | 0.59 | -999 |
| 5 | 10.95 | -80.11 | 0.43 | -999 | 0.76 | -999 |
| 5 | 10.28 | -80.03 | 0.33 | -999 | 0.59 | -999 |
| 5 | 9.99  | -79.97 | 0.54 | -999 | 0.70 | -999 |
| 5 | 7.20  | -80.15 | 0.22 | -999 | 0.52 | -999 |
| 5 | 7.08  | -80.41 | 0.46 | -999 | 0.64 | -999 |
| 5 | 7.08  | -80.98 | 0.31 | -999 | 0.44 | -999 |
| 5 | 7.09  | -81.25 | 0.73 | -999 | 0.44 | -999 |
| 5 | 7.09  | -81.79 | -999 | -999 | 0.36 | -999 |
| 5 | 7.17  | -82.06 | 0.42 | -999 | 0.39 | -999 |
| 5 | 7.34  | -82.60 | -999 | -999 | 0.36 | -999 |
| 5 | 7.40  | -82.88 | 0.37 | -999 | 0.50 | -999 |
| 5 | 7.54  | -83.44 | 0.16 | -999 | 0.36 | -999 |
| 5 | 7.60  | -83.71 | 0.55 | -999 | 0.39 | -999 |
| 5 | 7.74  | -84.25 | -999 | -999 | 0.26 | -999 |
| 5 | 7.81  | -84.52 | 0.58 | -999 | 0.37 | -999 |
| 5 | 7.96  | -85.07 | 0.22 | -999 | 0.26 | -999 |
| 5 | 8.03  | -85.35 | 0.47 | -999 | 0.47 | -999 |
| 5 | 8.19  | -85.91 | -999 | -999 | 0.39 | -999 |
| 5 | 8.27  | -86.19 | 0.24 | -999 | 0.54 | -999 |
| 5 | 8.42  | -86.74 | -999 | -999 | 0.46 | -999 |
| 5 | 8.49  | -87.01 | 0.31 | -999 | 0.55 | -999 |
| 5 | 8.63  | -87.58 | -999 | -999 | 0.26 | -999 |
| 5 | 8.70  | -87.85 | 0.32 | -999 | 0.66 | -999 |
| 5 | 8.94  | -88.38 | 0.21 | -999 | 0.42 | -999 |
| 5 | 9.10  | -88.62 | 0.70 | -999 | 0.45 | -999 |
| 5 | 9.41  | -89.11 | 0.19 | -999 | 0.37 | -999 |
| 5 | 9.56  | -89.36 | 0.58 | -999 | 0.57 | -999 |
| 5 | 9.87  | -89.87 | -999 | -999 | 0.43 | -999 |
| 5 | 10.02 | -90.13 | 0.52 | -999 | 0.57 | -999 |
| 5 | 10.34 | -90.63 | 0.21 | -999 | 0.47 | -999 |
| 5 | 10.51 | -90.89 | 0.46 | -999 | 0.67 | -999 |
| 5 | 10.84 | -91.43 | -999 | -999 | 0.59 | -999 |
| 5 | 11.02 | -91.70 | 0.65 | -999 | 0.90 | -999 |
| 5 | 11.35 | -92.24 | -999 | -999 | 0.72 | -999 |
| 5 | 11.52 | -92.49 | 0.57 | -999 | 1.24 | -999 |
| 5 | 11.80 | -93.02 | 0.33 | -999 | 0.87 | -999 |
| 5 | 11.96 | -93.28 | 0.45 | -999 | 0.73 | -999 |
| 5 | 12.28 | -93.81 | 0.25 | -999 | 0.32 | -999 |
| 5 | 12.44 | -94.08 | 0.34 | -999 | 0.51 | -999 |
| 5 | 12.78 | -94.58 | 0.12 | -999 | 0.46 | -999 |
| 5 | 12.94 | -94.84 | 0.30 | -999 | 0.61 | -999 |
| 5 | 13.25 | -95.36 | 0.23 | -999 | 0.49 | -999 |
| 5 | 13.40 | -95.60 | 0.44 | -999 | 0.83 | -999 |
| 5 | 13.69 | -96.12 | 0.39 | -999 | 0.74 | -999 |
| 5 | 13.84 | -96.38 | 0.49 | 0.54 | 0.95 | -999 |
| 5 | 14.17 | -96.90 | 0.21 | -999 | 0.61 | -999 |

|   |       |         |      |      |      |      |
|---|-------|---------|------|------|------|------|
| 5 | 14.34 | -97.16  | 0.35 | -999 | 0.64 | -999 |
| 5 | 14.66 | -97.70  | 0.24 | -999 | 0.44 | -999 |
| 5 | 14.82 | -97.96  | 0.43 | -999 | 0.60 | -999 |
| 5 | 15.15 | -98.47  | 0.29 | -999 | 0.63 | -999 |
| 5 | 15.32 | -98.71  | 0.36 | -999 | 0.64 | -999 |
| 5 | 15.62 | -99.22  | 0.17 | -999 | 0.42 | -999 |
| 5 | 15.77 | -99.48  | 0.47 | -999 | 0.60 | -999 |
| 5 | 16.08 | -100.00 | -999 | -999 | 0.36 | -999 |
| 5 | 16.24 | -100.26 | 0.25 | -999 | 0.44 | -999 |
| 5 | 16.55 | -100.75 | -999 | -999 | 0.50 | -999 |
| 5 | 16.71 | -101.00 | 0.25 | -999 | 0.41 | -999 |
| 5 | 16.99 | -101.46 | -999 | -999 | 0.34 | -999 |
| 5 | 17.16 | -101.73 | 0.23 | -999 | 0.50 | -999 |
| 5 | 17.47 | -102.29 | -999 | -999 | 0.30 | -999 |
| 5 | 17.64 | -102.54 | 0.34 | -999 | 0.58 | -999 |
| 5 | 17.94 | -103.07 | 0.21 | -999 | 0.44 | -999 |
| 5 | 18.10 | -103.35 | 0.46 | -999 | 0.42 | -999 |
| 5 | 18.42 | -103.84 | -999 | -999 | 0.30 | -999 |
| 5 | 18.59 | -104.09 | 0.40 | -999 | 0.82 | -999 |
| 5 | 18.89 | -104.61 | 0.21 | -999 | 0.32 | -999 |
| 5 | 19.05 | -104.87 | 0.34 | -999 | 0.42 | -999 |
| 5 | 19.34 | -105.40 | -999 | -999 | 0.38 | -999 |
| 5 | 19.49 | -105.66 | 0.41 | -999 | 0.46 | -999 |
| 5 | 19.79 | -106.17 | -999 | -999 | 0.34 | -999 |
| 5 | 19.95 | -106.42 | 0.33 | -999 | 0.47 | -999 |
| 5 | 20.27 | -106.96 | -999 | -999 | 0.45 | -999 |
| 5 | 20.42 | -107.24 | 0.48 | -999 | 0.52 | -999 |
| 5 | 20.73 | -107.79 | -999 | -999 | 0.33 | -999 |
| 5 | 20.90 | -108.06 | 0.30 | -999 | 0.48 | -999 |
| 5 | 21.23 | -108.59 | -999 | -999 | 0.33 | -999 |
| 5 | 21.39 | -108.85 | 0.29 | -999 | 0.48 | -999 |
| 5 | 21.67 | -109.38 | -999 | -999 | 0.32 | -999 |
| 5 | 21.82 | -109.64 | 0.21 | -999 | 0.40 | -999 |
| 5 | 22.12 | -110.18 | -999 | -999 | 0.22 | -999 |
| 5 | 22.27 | -110.45 | 0.19 | -999 | 0.39 | -999 |
| 5 | 22.58 | -110.97 | -999 | -999 | 0.36 | -999 |
| 5 | 22.74 | -111.23 | 0.21 | -999 | 0.46 | -999 |
| 5 | 23.08 | -111.73 | -999 | -999 | 0.25 | -999 |
| 5 | 23.30 | -111.93 | -999 | -999 | 0.48 | -999 |
| 5 | 23.73 | -112.32 | -999 | -999 | 0.61 | -999 |
| 5 | 24.24 | -112.77 | -999 | 0.39 | 0.89 | -999 |
| 5 | 24.68 | -113.16 | -999 | -999 | 0.84 | -999 |
| 5 | 24.90 | -113.36 | -999 | -999 | 1.09 | -999 |
| 5 | 25.35 | -113.71 | -999 | -999 | 0.63 | -999 |
| 5 | 25.57 | -113.89 | 0.18 | -999 | 1.13 | -999 |
| 5 | 26.01 | -114.28 | -999 | -999 | 0.59 | -999 |
| 5 | 26.24 | -114.48 | 0.10 | -999 | 0.95 | -999 |

|       |       |         |      |      |      |      |
|-------|-------|---------|------|------|------|------|
| 5     | 26.70 | -114.88 | -999 | -999 | 0.80 | -999 |
| 5     | 26.95 | -115.07 | -999 | -999 | 1.03 | -999 |
| 5     | 27.43 | -115.47 | -999 | -999 | 0.65 | -999 |
| 5     | 27.65 | -115.68 | -999 | -999 | 0.96 | -999 |
| 5     | 28.13 | -116.04 | -999 | -999 | 0.64 | -999 |
| 5     | 28.37 | -116.22 | -999 | -999 | 0.82 | -999 |
| 5     | 28.91 | -116.41 | -999 | -999 | 0.56 | -999 |
| 5     | 29.18 | -116.46 | -999 | -999 | 0.73 | -999 |
| 5     | 29.69 | -116.57 | -999 | -999 | 0.60 | -999 |
| 5     | 29.94 | -116.63 | -999 | -999 | 0.75 | -999 |
| 5     | 30.48 | -116.77 | -999 | -999 | 0.42 | -999 |
| 5     | 30.76 | -116.83 | -999 | -999 | 0.70 | -999 |
| 5     | 31.34 | -116.94 | -999 | -999 | 0.51 | -999 |
| 5     | 31.60 | -117.01 | 0.13 | -999 | 0.80 | -999 |
| 5     | 32.17 | -117.12 | -999 | -999 | 0.67 | -999 |
| 5     | 32.45 | -117.17 | 0.12 | -999 | 0.92 | -999 |
| 5     | 32.65 | -117.26 | 0.07 | -999 | 0.65 | -999 |
| 5     | 32.76 | -117.56 | -999 | -999 | 0.62 | -999 |
| 5     | 32.98 | -118.17 | -999 | -999 | 0.49 | -999 |
| 5     | 33.09 | -118.48 | 0.29 | -999 | 0.59 | -999 |
| 5     | 33.31 | -119.13 | -999 | -999 | 0.52 | -999 |
| 5     | 33.42 | -119.45 | -999 | -999 | 0.72 | -999 |
| 5     | 33.67 | -120.09 | -999 | -999 | 0.55 | -999 |
| 5     | 33.81 | -120.39 | -999 | -999 | 0.64 | -999 |
| 5     | 34.22 | -120.88 | -999 | -999 | 0.51 | -999 |
| 5     | 34.47 | -121.08 | -999 | -999 | 0.88 | -999 |
| 5     | 34.96 | -121.42 | -999 | -999 | 0.48 | -999 |
| 5     | 35.20 | -121.60 | -999 | -999 | 0.52 | -999 |
| 5     | 35.69 | -121.95 | -999 | -999 | 0.45 | -999 |
| 5     | 35.94 | -122.13 | 0.19 | -999 | 0.70 | -999 |
| 5     | 36.43 | -122.49 | -999 | -999 | 0.40 | -999 |
| 5     | 36.68 | -122.67 | -999 | -999 | 0.62 | -999 |
| 5     | 37.17 | -123.05 | -999 | -999 | 0.49 | -999 |
| 5     | 37.29 | -123.14 | -999 | -999 | 0.68 | -999 |
| 5     | 37.77 | -123.51 | -999 | -999 | 0.49 | -999 |
| 5     | 38.03 | -123.68 | -999 | -999 | 0.48 | -999 |
| 5     | 38.57 | -123.90 | -999 | -999 | 0.33 | -999 |
| 5     | 38.82 | -124.06 | -999 | -999 | 0.43 | -999 |
| 5     | 39.30 | -124.40 | -999 | -999 | 0.32 | -999 |
| 5     | 39.55 | -124.55 | -999 | -999 | 0.54 | -999 |
| 5     | 40.08 | -124.82 | -999 | -999 | 0.50 | -999 |
| 5     | 40.36 | -124.92 | -999 | -999 | 0.79 | -999 |
| <hr/> |       |         |      |      |      |      |
| 6     | 12.32 | 147.01  | 0.80 | -999 | 0.28 | -999 |
| 6     | 12.26 | 147.18  | 0.43 | 0.66 | -999 | -999 |
| 6     | 12.15 | 147.51  | 0.61 | -999 | 0.22 | -999 |
| 6     | 12.09 | 147.68  | 0.59 | 0.72 | -999 | -999 |
| 6     | 11.98 | 148.00  | 0.70 | -999 | 0.24 | -999 |

|   |       |        |      |      |      |      |
|---|-------|--------|------|------|------|------|
| 6 | 11.92 | 148.16 | 0.46 | 0.76 | -999 | -999 |
| 6 | 11.81 | 148.48 | 0.63 | -999 | 0.29 | -999 |
| 6 | 11.75 | 148.64 | -999 | -999 | -999 | -999 |
| 6 | 11.41 | 149.63 | 1.00 | -999 | 0.22 | -999 |
| 6 | 11.35 | 149.79 | 0.63 | 0.86 | -999 | -999 |
| 6 | 11.24 | 150.12 | 0.91 | -999 | 0.19 | -999 |
| 6 | 11.21 | 150.19 | 0.65 | 0.86 | -999 | -999 |
| 6 | 11.14 | 150.40 | 0.84 | -999 | 0.20 | -999 |
| 6 | 11.08 | 150.57 | -999 | 0.87 | -999 | -999 |
| 6 | 10.91 | 151.07 | -999 | -999 | 0.21 | -999 |
| 6 | 10.85 | 151.23 | -999 | 0.85 | -999 | -999 |
| 6 | 10.74 | 151.54 | -999 | -999 | 0.22 | -999 |
| 6 | 10.69 | 151.69 | -999 | 1.18 | -999 | -999 |
| 6 | 10.59 | 151.98 | 0.80 | -999 | 0.25 | -999 |
| 6 | 10.54 | 152.13 | 0.59 | 0.86 | -999 | -999 |
| 6 | 10.42 | 152.46 | 0.70 | -999 | 0.20 | -999 |
| 6 | 10.37 | 152.60 | 0.56 | 0.76 | -999 | -999 |
| 6 | 10.26 | 152.90 | -999 | -999 | 0.29 | -999 |
| 6 | 10.21 | 153.06 | -999 | 0.66 | -999 | -999 |
| 6 | 10.10 | 153.37 | -999 | -999 | 0.28 | -999 |
| 6 | 10.05 | 153.52 | -999 | 0.70 | -999 | -999 |
| 6 | 9.94  | 153.85 | -999 | -999 | 0.30 | -999 |
| 6 | 9.88  | 154.00 | -999 | 0.74 | -999 | -999 |
| 6 | 9.83  | 154.13 | -999 | -999 | 0.29 | -999 |
| 6 | 9.78  | 154.29 | -999 | 0.69 | -999 | -999 |
| 6 | 9.65  | 154.66 | 0.97 | -999 | 0.30 | -999 |
| 6 | 9.59  | 154.81 | -999 | 0.81 | -999 | -999 |
| 6 | 9.52  | 155.02 | -999 | -999 | 0.16 | -999 |
| 6 | 9.48  | 155.13 | 0.52 | 0.71 | -999 | -999 |
| 6 | 9.41  | 155.33 | -999 | -999 | 0.21 | -999 |
| 6 | 9.38  | 155.43 | -999 | 0.75 | -999 | -999 |
| 6 | 9.31  | 155.64 | 0.93 | -999 | 0.19 | -999 |
| 6 | 9.24  | 155.83 | 1.17 | 1.11 | -999 | -999 |
| 6 | 9.19  | 155.96 | 1.01 | -999 | 0.26 | -999 |
| 6 | 9.17  | 156.03 | 0.80 | 0.95 | -999 | -999 |
| 6 | 9.12  | 156.16 | 1.15 | -999 | 0.28 | -999 |
| 6 | 9.10  | 156.23 | 0.77 | 0.95 | -999 | -999 |
| 6 | 9.05  | 156.36 | -999 | -999 | 0.30 | -999 |
| 6 | 9.04  | 156.38 | 0.94 | 0.82 | -999 | -999 |
| 6 | 9.00  | 156.50 | 1.07 | -999 | 0.34 | -999 |
| 6 | 8.97  | 156.59 | 1.09 | 0.87 | -999 | -999 |
| 6 | 8.86  | 156.90 | 1.04 | -999 | 0.31 | -999 |
| 6 | 8.80  | 157.06 | 0.75 | 0.87 | -999 | -999 |
| 6 | 8.69  | 157.39 | 1.14 | -999 | 0.25 | -999 |
| 6 | 8.63  | 157.55 | 0.65 | 0.82 | -999 | -999 |
| 6 | 8.52  | 157.86 | 0.77 | -999 | 0.35 | -999 |
| 6 | 8.47  | 158.02 | 0.68 | 0.79 | -999 | -999 |

|   |      |        |      |      |      |      |
|---|------|--------|------|------|------|------|
| 6 | 8.36 | 158.33 | 0.86 | -999 | 0.26 | -999 |
| 6 | 8.30 | 158.49 | 0.45 | 0.88 | -999 | -999 |
| 6 | 8.20 | 158.78 | 0.70 | -999 | 0.36 | -999 |
| 6 | 8.14 | 158.93 | 0.58 | 0.85 | -999 | -999 |
| 6 | 8.04 | 159.24 | 0.91 | -999 | 0.30 | -999 |
| 6 | 7.98 | 159.40 | 0.73 | 0.90 | -999 | -999 |
| 6 | 7.87 | 159.70 | 1.02 | -999 | 0.34 | -999 |
| 6 | 7.82 | 159.86 | -999 | 0.75 | -999 | -999 |
| 6 | 7.77 | 160.01 | 1.06 | -999 | 0.31 | -999 |
| 6 | 7.72 | 160.14 | 0.76 | 0.88 | -999 | -999 |
| 6 | 7.62 | 160.42 | 1.16 | -999 | 0.29 | -999 |
| 6 | 7.58 | 160.55 | 0.75 | 0.66 | -999 | -999 |
| 6 | 7.49 | 160.81 | 0.81 | -999 | 0.30 | -999 |
| 6 | 7.44 | 160.92 | 0.70 | 0.83 | -999 | -999 |
| 6 | 7.36 | 161.15 | 0.91 | -999 | 0.31 | -999 |
| 6 | 7.32 | 161.27 | 0.68 | 0.88 | -999 | -999 |
| 6 | 7.23 | 161.51 | 0.75 | -999 | 0.26 | -999 |
| 6 | 7.19 | 161.64 | -999 | 0.85 | -999 | -999 |
| 6 | 7.10 | 161.89 | 1.06 | -999 | 0.35 | -999 |
| 6 | 7.06 | 162.01 | 0.49 | 0.71 | -999 | -999 |
| 6 | 6.97 | 162.26 | 1.02 | -999 | 0.39 | -999 |
| 6 | 6.92 | 162.39 | 0.85 | 0.87 | -999 | -999 |
| 6 | 6.84 | 162.64 | 0.93 | -999 | 0.37 | -999 |
| 6 | 6.79 | 162.77 | 0.79 | 0.77 | -999 | -999 |
| 6 | 6.70 | 163.02 | 0.92 | -999 | 0.41 | -999 |
| 6 | 6.66 | 163.13 | 0.66 | 0.93 | -999 | -999 |
| 6 | 6.62 | 163.25 | 0.82 | -999 | 0.39 | -999 |
| 6 | 6.58 | 163.36 | 0.53 | 0.78 | -999 | -999 |
| 6 | 6.50 | 163.60 | 0.74 | -999 | 0.34 | -999 |
| 6 | 6.44 | 163.77 | 0.60 | 0.89 | -999 | -999 |
| 6 | 6.35 | 164.00 | 0.82 | -999 | 0.32 | -999 |
| 6 | 6.31 | 164.12 | 0.62 | 0.75 | -999 | -999 |
| 6 | 6.23 | 164.35 | 0.82 | -999 | 0.30 | -999 |
| 6 | 6.19 | 164.47 | 0.57 | 0.74 | -999 | -999 |
| 6 | 6.11 | 164.71 | 0.92 | -999 | 0.37 | -999 |
| 6 | 6.06 | 164.82 | 0.79 | 0.66 | -999 | -999 |
| 6 | 5.98 | 165.06 | 0.92 | -999 | 0.41 | -999 |
| 6 | 5.93 | 165.17 | 0.58 | 0.88 | -999 | -999 |
| 6 | 5.84 | 165.40 | 1.12 | -999 | 0.33 | -999 |
| 6 | 5.79 | 165.52 | 0.86 | 0.79 | -999 | -999 |
| 6 | 5.70 | 165.76 | 0.85 | -999 | 0.42 | -999 |
| 6 | 5.65 | 165.88 | 0.68 | 0.72 | -999 | -999 |
| 6 | 5.27 | 166.84 | 0.98 | -999 | 0.57 | -999 |
| 6 | 5.22 | 166.95 | 0.59 | 0.71 | -999 | -999 |
| 6 | 5.13 | 167.17 | 0.81 | -999 | 0.34 | -999 |
| 6 | 5.09 | 167.29 | 0.61 | 0.86 | -999 | -999 |
| 6 | 4.99 | 167.52 | 0.92 | -999 | 0.35 | -999 |

|   |      |        |      |      |      |      |
|---|------|--------|------|------|------|------|
| 6 | 4.95 | 167.64 | 0.61 | 0.85 | -999 | -999 |
| 6 | 4.41 | 168.98 | 0.97 | -999 | 0.42 | -999 |
| 6 | 4.38 | 169.05 | 0.73 | 1.09 | -999 | -999 |
| 6 | 4.29 | 169.28 | 0.99 | -999 | 0.24 | -999 |
| 6 | 4.25 | 169.40 | 0.66 | 0.88 | -999 | -999 |
| 6 | 4.12 | 169.70 | 1.09 | -999 | 0.21 | -999 |
| 6 | 4.08 | 169.82 | 0.79 | 0.86 | -999 | -999 |
| 6 | 3.98 | 170.06 | 1.04 | -999 | 0.20 | -999 |
| 6 | 3.94 | 170.16 | 0.82 | 1.19 | -999 | -999 |
| 6 | 3.84 | 170.40 | 0.91 | -999 | 0.18 | -999 |
| 6 | 3.80 | 170.51 | 0.87 | 1.01 | -999 | -999 |
| 6 | 3.70 | 170.75 | 1.18 | -999 | 0.17 | -999 |
| 6 | 3.65 | 170.87 | 0.74 | 1.00 | -999 | -999 |
| 6 | 3.56 | 171.11 | 1.07 | -999 | 0.20 | -999 |
| 6 | 3.51 | 171.22 | 0.77 | 1.20 | -999 | -999 |
| 6 | 3.42 | 171.46 | 0.88 | -999 | 0.14 | -999 |
| 6 | 3.37 | 171.57 | 0.74 | 1.13 | -999 | -999 |
| 6 | 3.30 | 171.76 | 1.14 | -999 | 0.17 | -999 |
| 6 | 3.29 | 171.78 | 0.93 | 1.28 | -999 | -999 |
| 6 | 3.20 | 172.02 | 1.13 | -999 | 0.23 | -999 |
| 6 | 3.15 | 172.13 | 1.03 | 1.28 | -999 | -999 |
| 6 | 3.06 | 172.36 | 1.28 | -999 | 0.21 | -999 |
| 6 | 3.00 | 172.52 | 1.64 | 1.19 | -999 | -999 |
| 6 | 2.90 | 172.75 | 1.09 | -999 | 0.26 | -999 |
| 6 | 2.86 | 172.86 | 1.00 | 1.10 | -999 | -999 |
| 6 | 2.77 | 173.07 | 1.10 | -999 | 0.22 | -999 |
| 6 | 2.73 | 173.18 | 0.93 | 1.12 | -999 | -999 |
| 6 | 2.64 | 173.42 | 1.24 | -999 | 0.20 | -999 |
| 6 | 2.59 | 173.53 | 1.08 | 1.19 | -999 | -999 |
| 6 | 2.50 | 173.76 | 1.29 | -999 | 0.35 | -999 |
| 6 | 2.45 | 173.88 | 1.13 | 1.35 | -999 | -999 |
| 6 | 2.36 | 174.12 | 1.28 | -999 | 0.27 | -999 |
| 6 | 2.31 | 174.23 | 1.15 | 1.24 | -999 | -999 |
| 6 | 2.21 | 174.48 | 1.52 | -999 | 0.29 | -999 |
| 6 | 2.16 | 174.59 | 1.24 | 1.06 | -999 | -999 |
| 6 | 2.13 | 174.69 | 1.64 | -999 | 0.33 | -999 |
| 6 | 2.08 | 174.80 | 1.30 | 1.11 | -999 | -999 |
| 6 | 1.99 | 175.04 | 1.41 | -999 | 0.30 | -999 |
| 6 | 1.94 | 175.16 | 1.36 | 1.21 | -999 | -999 |
| 6 | 1.84 | 175.41 | 1.32 | -999 | 0.27 | -999 |
| 6 | 1.80 | 175.52 | 1.43 | 1.23 | -999 | -999 |
| 6 | 1.70 | 175.75 | 1.54 | -999 | 0.26 | -999 |
| 6 | 1.66 | 175.87 | 1.20 | 1.27 | -999 | -999 |
| 6 | 1.56 | 176.10 | 1.41 | -999 | 0.26 | -999 |
| 6 | 1.51 | 176.22 | 1.15 | 1.25 | -999 | -999 |
| 6 | 1.42 | 176.45 | 1.60 | -999 | 0.31 | -999 |
| 6 | 1.37 | 176.57 | 1.44 | 1.38 | -999 | -999 |

|   |      |         |      |      |      |      |
|---|------|---------|------|------|------|------|
| 6 | 1.27 | 176.81  | 1.37 | -999 | 0.32 | -999 |
| 6 | 1.23 | 176.93  | 1.34 | 1.22 | -999 | -999 |
| 6 | 1.13 | 177.18  | 1.54 | -999 | 0.39 | -999 |
| 6 | 1.08 | 177.30  | 1.34 | 1.36 | -999 | -999 |
| 6 | 0.97 | 177.55  | 1.76 | -999 | 0.30 | -999 |
| 6 | 0.97 | 177.57  | 1.44 | 1.62 | -999 | -999 |
| 6 | 0.89 | 177.75  | -999 | -999 | -999 | -999 |
| 6 | 0.85 | 177.87  | -999 | -999 | -999 | -999 |
| 6 | 0.75 | 178.09  | -999 | 0.86 | 0.21 | -999 |
| 6 | 0.70 | 178.23  | 1.90 | 1.03 | -999 | -999 |
| 6 | 0.61 | 178.45  | 1.80 | 1.01 | 0.24 | -999 |
| 6 | 0.57 | 178.57  | 1.80 | 1.19 | -999 | -999 |
| 6 | 0.48 | 178.79  | 1.90 | -999 | 0.28 | -999 |
| 6 | 0.43 | 178.91  | 1.88 | 1.21 | -999 | -999 |
| 6 | 0.35 | 179.12  | 1.80 | -999 | 0.21 | -999 |
| 6 | 0.30 | 179.24  | 1.62 | 1.47 | -999 | -999 |
| 6 | 0.21 | 179.48  | 1.59 | -999 | 0.21 | -999 |
| 6 | 0.16 | 179.59  | 1.72 | 1.54 | -999 | -999 |
| 6 | 0.07 | 179.83  | 1.75 | -999 | 0.23 | -999 |
| 6 | 0.02 | 179.96  | 1.86 | 1.65 | -999 | -999 |
| 6 | 0.00 | -179.79 | 1.99 | -999 | 0.27 | -999 |
| 6 | 0.00 | -179.30 | 2.12 | 1.31 | -999 | -999 |
| 6 | 0.00 | -179.04 | 2.03 | -999 | 0.29 | -999 |
| 6 | 0.00 | -178.92 | 2.03 | 1.32 | -999 | -999 |
| 6 | 0.00 | -178.65 | 1.85 | -999 | 0.31 | -999 |
| 6 | 0.05 | -178.55 | 1.96 | 1.37 | -999 | -999 |
| 6 | 0.23 | -178.37 | 2.01 | -999 | 0.28 | -999 |
| 6 | 0.32 | -178.28 | 1.87 | 1.53 | -999 | -999 |
| 6 | 0.50 | -178.10 | 2.01 | -999 | 0.26 | -999 |
| 6 | 0.60 | -178.02 | 1.97 | 1.44 | -999 | -999 |
| 6 | 0.78 | -177.83 | 2.09 | -999 | 0.25 | -999 |
| 6 | 0.88 | -177.74 | 1.84 | 1.31 | -999 | -999 |
| 6 | 1.06 | -177.56 | 1.83 | -999 | 0.24 | -999 |
| 6 | 1.15 | -177.47 | 1.72 | 1.52 | -999 | -999 |
| 6 | 1.34 | -177.29 | 1.86 | -999 | 0.21 | -999 |
| 6 | 1.43 | -177.19 | 1.57 | 1.41 | -999 | -999 |
| 6 | 1.58 | -177.04 | 1.72 | -999 | 0.27 | -999 |
| 6 | 1.60 | -177.02 | 2.06 | 1.33 | -999 | -999 |
| 6 | 1.78 | -176.84 | 1.82 | -999 | 0.27 | -999 |
| 6 | 1.88 | -176.75 | 1.71 | 1.37 | -999 | -999 |
| 6 | 2.06 | -176.57 | 1.76 | -999 | 0.33 | -999 |
| 6 | 2.17 | -176.46 | 1.70 | 1.43 | -999 | -999 |
| 6 | 2.34 | -176.27 | 1.69 | -999 | 0.30 | -999 |
| 6 | 2.43 | -176.19 | 1.55 | 1.47 | -999 | -999 |
| 6 | 2.61 | -176.01 | 1.44 | -999 | 0.22 | -999 |
| 6 | 2.70 | -175.92 | 1.35 | 1.33 | -999 | -999 |
| 6 | 2.87 | -175.73 | 1.35 | -999 | 0.19 | -999 |



|   |      |         |      |      |      |      |
|---|------|---------|------|------|------|------|
| 6 | 2.95 | -175.64 | 1.32 | 1.32 | -999 | -999 |
| 6 | 3.13 | -175.46 | 1.44 | -999 | 0.24 | -999 |
| 6 | 3.22 | -175.37 | 1.18 | 1.29 | -999 | -999 |
| 6 | 3.39 | -175.19 | 1.10 | -999 | 0.40 | -999 |
| 6 | 3.47 | -175.10 | 0.90 | 1.19 | -999 | -999 |
| 6 | 3.65 | -174.92 | 1.27 | -999 | 0.48 | -999 |
| 6 | 3.74 | -174.83 | 1.06 | 1.22 | -999 | -999 |
| 6 | 3.82 | -174.76 | 1.33 | -999 | 0.47 | -999 |
| 6 | 3.90 | -174.67 | 1.16 | 1.01 | -999 | -999 |
| 6 | 4.08 | -174.49 | 1.39 | -999 | 0.46 | -999 |
| 6 | 4.17 | -174.40 | 1.07 | 1.01 | -999 | -999 |
| 6 | 4.36 | -174.18 | -999 | -999 | -999 | -999 |
| 6 | 4.46 | -174.08 | 0.93 | 1.02 | -999 | -999 |
| 6 | 4.66 | -173.88 | 1.35 | -999 | 0.43 | -999 |
| 6 | 4.76 | -173.79 | 1.31 | 1.06 | -999 | -999 |
| 6 | 4.95 | -173.61 | 1.18 | -999 | 0.45 | -999 |
| 6 | 5.05 | -173.51 | 1.06 | 1.05 | -999 | -999 |
| 6 | 5.25 | -173.31 | 1.14 | -999 | 0.39 | -999 |
| 6 | 5.34 | -173.21 | 0.94 | 1.02 | -999 | -999 |
| 6 | 5.54 | -173.01 | 1.33 | -999 | 0.36 | -999 |
| 6 | 5.64 | -172.91 | 1.16 | 1.03 | -999 | -999 |
| 6 | 5.85 | -172.70 | 1.36 | -999 | 0.31 | -999 |
| 6 | 5.91 | -172.64 | 1.24 | 0.96 | -999 | -999 |
| 6 | 5.97 | -172.52 | 1.67 | -999 | 0.30 | -999 |
| 6 | 5.87 | -172.42 | 1.59 | 1.14 | -999 | -999 |
| 6 | 5.68 | -172.23 | 1.80 | -999 | 0.31 | -999 |
| 6 | 5.56 | -172.10 | 1.43 | 1.34 | -999 | -999 |
| 6 | 5.38 | -171.91 | 1.71 | -999 | 0.25 | -999 |
| 6 | 5.28 | -171.81 | 1.33 | 1.16 | -999 | -999 |
| 6 | 5.08 | -171.62 | 1.55 | -999 | 0.20 | -999 |
| 6 | 4.98 | -171.52 | 1.81 | 1.24 | -999 | -999 |
| 6 | 4.78 | -171.33 | 1.62 | -999 | 0.33 | -999 |
| 6 | 4.69 | -171.23 | 1.58 | 1.42 | -999 | -999 |
| 6 | 4.50 | -171.04 | 2.01 | -999 | 0.36 | -999 |
| 6 | 4.40 | -170.95 | 1.91 | 1.49 | -999 | -999 |
| 6 | 4.21 | -170.75 | 1.73 | -999 | 0.28 | -999 |
| 6 | 4.11 | -170.65 | 1.70 | 1.55 | -999 | -999 |
| 6 | 3.92 | -170.46 | 2.17 | -999 | 0.32 | -999 |
| 6 | 3.89 | -170.42 | 1.91 | 1.36 | -999 | -999 |
| 6 | 3.72 | -170.26 | 2.07 | -999 | 0.30 | -999 |
| 6 | 3.63 | -170.16 | 1.67 | 1.41 | -999 | -999 |
| 6 | 3.43 | -169.97 | 1.98 | -999 | 0.30 | -999 |
| 6 | 3.34 | -169.87 | 1.84 | 1.17 | -999 | -999 |
| 6 | 3.13 | -169.67 | 1.68 | -999 | 0.25 | -999 |
| 6 | 3.04 | -169.58 | 1.78 | 1.16 | -999 | -999 |
| 6 | 2.84 | -169.38 | 1.88 | -999 | 0.24 | -999 |
| 6 | 2.75 | -169.28 | 1.80 | 1.20 | -999 | -999 |

|   |      |         |      |      |      |      |
|---|------|---------|------|------|------|------|
| 6 | 2.55 | -169.08 | 1.97 | -999 | 0.29 | -999 |
| 6 | 2.45 | -168.99 | 1.90 | 1.27 | -999 | -999 |
| 6 | 2.25 | -168.79 | 1.94 | -999 | 0.31 | -999 |
| 6 | 2.16 | -168.69 | 1.92 | 1.45 | -999 | -999 |
| 6 | 1.97 | -168.50 | 1.92 | -999 | 0.29 | -999 |
| 6 | 1.87 | -168.41 | 1.71 | 1.23 | -999 | -999 |
| 6 | 1.68 | -168.22 | 1.81 | -999 | 0.25 | -999 |
| 6 | 1.58 | -168.12 | 1.69 | 1.14 | -999 | -999 |
| 6 | 1.38 | -167.92 | 1.71 | -999 | 0.30 | -999 |
| 6 | 1.29 | -167.82 | 1.67 | 1.24 | -999 | -999 |
| 6 | 1.09 | -167.63 | 1.93 | -999 | 0.31 | -999 |
| 6 | 1.03 | -167.56 | 2.04 | 1.53 | -999 | -999 |
| 6 | 0.92 | -167.45 | 1.99 | -999 | 0.32 | -999 |
| 6 | 0.82 | -167.35 | 1.90 | 1.21 | -999 | -999 |
| 6 | 0.62 | -167.16 | 2.16 | -999 | 0.26 | -999 |
| 6 | 0.52 | -167.06 | 2.02 | 1.34 | -999 | -999 |
| 6 | 0.32 | -166.85 | 2.20 | -999 | 0.32 | -999 |
| 6 | 0.23 | -166.76 | 2.00 | 1.31 | -999 | -999 |
| 6 | 0.04 | -166.57 | 1.92 | -999 | 0.32 | -999 |
| 6 | 0.02 | -166.57 | 1.86 | 1.17 | -999 | -999 |
| 6 | 0.15 | -166.39 | 1.91 | -999 | 0.27 | -999 |
| 6 | 0.24 | -166.29 | 1.86 | 1.29 | -999 | -999 |
| 6 | 0.44 | -166.09 | 1.96 | -999 | 0.27 | -999 |
| 6 | 0.54 | -165.99 | 1.98 | 1.34 | -999 | -999 |
| 6 | 0.73 | -165.80 | 2.16 | -999 | 0.27 | -999 |
| 6 | 0.83 | -165.70 | 1.94 | 1.09 | -999 | -999 |
| 6 | 1.02 | -165.51 | 1.98 | -999 | 0.31 | -999 |
| 6 | 1.13 | -165.40 | 1.84 | 1.21 | -999 | -999 |
| 6 | 1.32 | -165.21 | 1.93 | -999 | 0.22 | -999 |
| 6 | 1.41 | -165.12 | 1.88 | 1.13 | -999 | -999 |
| 6 | 1.60 | -164.93 | 1.92 | -999 | 0.22 | -999 |
| 6 | 1.70 | -164.83 | 1.71 | 1.12 | -999 | -999 |
| 6 | 1.88 | -164.64 | 1.80 | -999 | 0.20 | -999 |
| 6 | 1.98 | -164.55 | 1.73 | 1.36 | -999 | -999 |
| 6 | 2.17 | -164.36 | 1.82 | -999 | 0.22 | -999 |
| 6 | 2.26 | -164.26 | 1.68 | 1.06 | -999 | -999 |
| 6 | 2.46 | -164.07 | 1.86 | -999 | 0.25 | -999 |
| 6 | 2.56 | -163.97 | 1.79 | 1.32 | -999 | -999 |
| 6 | 2.65 | -163.87 | 1.97 | -999 | 0.25 | -999 |
| 6 | 2.75 | -163.77 | 1.79 | 1.20 | -999 | -999 |
| 6 | 2.94 | -163.58 | 2.08 | -999 | 0.25 | -999 |
| 6 | 3.04 | -163.48 | 1.99 | 1.22 | -999 | -999 |
| 6 | 3.25 | -163.27 | 2.13 | -999 | 0.27 | -999 |
| 6 | 3.35 | -163.17 | 1.96 | 1.32 | -999 | -999 |
| 6 | 3.55 | -162.97 | 2.11 | -999 | 0.32 | -999 |
| 6 | 3.65 | -162.87 | 1.98 | 1.47 | -999 | -999 |
| 6 | 3.83 | -162.68 | 2.07 | -999 | 0.33 | -999 |

|   |      |         |      |      |      |      |
|---|------|---------|------|------|------|------|
| 6 | 3.93 | -162.58 | 2.08 | 1.22 | -999 | -999 |
| 6 | 4.12 | -162.39 | 2.23 | -999 | 0.28 | -999 |
| 6 | 4.21 | -162.30 | 2.31 | 1.38 | -999 | -999 |
| 6 | 4.40 | -162.11 | 2.12 | -999 | 0.32 | -999 |
| 6 | 4.50 | -162.01 | 2.07 | 1.26 | -999 | -999 |
| 6 | 4.69 | -161.82 | 2.03 | -999 | 0.32 | -999 |
| 6 | 4.79 | -161.72 | 1.94 | 1.22 | -999 | -999 |
| 6 | 4.87 | -161.63 | 2.16 | -999 | 0.31 | -999 |
| 6 | 4.97 | -161.54 | 1.97 | 1.13 | -999 | -999 |
| 6 | 5.16 | -161.35 | 2.14 | -999 | 0.30 | -999 |
| 6 | 5.25 | -161.25 | 1.94 | 1.31 | -999 | -999 |
| 6 | 5.49 | -161.02 | 2.11 | -999 | 0.39 | -999 |
| 6 | 5.58 | -160.93 | 1.75 | 1.20 | -999 | -999 |
| 6 | 5.77 | -160.74 | 1.92 | -999 | 0.32 | -999 |
| 6 | 5.86 | -160.64 | 1.86 | 1.11 | -999 | -999 |
| 6 | 5.95 | -160.46 | 1.83 | -999 | 0.29 | -999 |
| 6 | 5.84 | -160.39 | 1.87 | 1.14 | -999 | -999 |
| 6 | 5.62 | -160.23 | 2.07 | -999 | 0.35 | -999 |
| 6 | 5.51 | -160.15 | 2.07 | 1.13 | -999 | -999 |
| 6 | 5.30 | -160.00 | 2.33 | -999 | 0.33 | -999 |
| 6 | 5.19 | -159.92 | 2.17 | 1.08 | -999 | -999 |
| 6 | 4.96 | -159.76 | 2.14 | -999 | 0.32 | -999 |
| 6 | 4.85 | -159.69 | 1.98 | 1.25 | -999 | -999 |
| 6 | 4.74 | -159.60 | 1.95 | -999 | 0.27 | -999 |
| 6 | 4.63 | -159.52 | 2.03 | 1.30 | -999 | -999 |
| 6 | 4.41 | -159.37 | 2.20 | -999 | 0.38 | -999 |
| 6 | 4.32 | -159.29 | 2.09 | 1.26 | -999 | -999 |
| 6 | 4.11 | -159.06 | 2.11 | -999 | 0.38 | -999 |
| 6 | 4.02 | -158.97 | 2.06 | 1.28 | -999 | -999 |
| 6 | 3.87 | -158.75 | 2.37 | -999 | 0.40 | -999 |
| 6 | 3.79 | -158.65 | 2.49 | 1.28 | -999 | -999 |
| 6 | 3.61 | -158.45 | 2.42 | -999 | 0.36 | -999 |
| 6 | 3.52 | -158.35 | 2.34 | 1.21 | -999 | -999 |
| 6 | 3.32 | -158.16 | 2.56 | -999 | 0.38 | -999 |
| 6 | 3.22 | -158.07 | 2.49 | 1.40 | -999 | -999 |
| 6 | 3.01 | -157.88 | 2.51 | -999 | 0.38 | -999 |
| 6 | 3.13 | -157.88 | 2.49 | 1.25 | -999 | -999 |
| 6 | 3.40 | -157.88 | 2.35 | -999 | 0.35 | -999 |
| 6 | 3.41 | -157.88 | 2.35 | 1.21 | -999 | -999 |
| 6 | 3.66 | -157.79 | 2.45 | -999 | 0.32 | -999 |
| 6 | 3.78 | -157.73 | 2.48 | 1.14 | -999 | -999 |
| 6 | 4.03 | -157.83 | 2.41 | -999 | 0.27 | -999 |
| 6 | 4.16 | -157.89 | 2.45 | 1.19 | -999 | -999 |
| 6 | 4.45 | -158.03 | 2.41 | -999 | 0.24 | -999 |
| 6 | 4.58 | -158.08 | 2.26 | 1.12 | -999 | -999 |
| 6 | 4.85 | -158.20 | 2.19 | -999 | 0.24 | -999 |
| 6 | 4.97 | -158.25 | 2.09 | 1.13 | -999 | -999 |

|   |       |         |      |      |      |      |
|---|-------|---------|------|------|------|------|
| 6 | 5.23  | -158.36 | 2.17 | -999 | 0.33 | -999 |
| 6 | 5.36  | -158.42 | 1.86 | 1.11 | -999 | -999 |
| 6 | 5.62  | -158.51 | 2.01 | -999 | 0.30 | -999 |
| 6 | 5.75  | -158.56 | 1.78 | 1.14 | -999 | -999 |
| 6 | 6.00  | -158.65 | 1.79 | -999 | 0.33 | -999 |
| 6 | 6.13  | -158.70 | 1.76 | 1.15 | -999 | -999 |
| 6 | 6.36  | -158.78 | 1.68 | -999 | 0.36 | -999 |
| 6 | 6.39  | -158.79 | 1.75 | 1.09 | -999 | -999 |
| 6 | 6.63  | -158.68 | 1.79 | -999 | 0.36 | -999 |
| 6 | 6.77  | -158.66 | 1.45 | 0.91 | -999 | -999 |
| 6 | 7.01  | -158.59 | 1.50 | -999 | 0.41 | -999 |
| 6 | 7.13  | -158.56 | 1.22 | 0.86 | -999 | -999 |
| 6 | 7.41  | -158.52 | 1.26 | -999 | 0.46 | -999 |
| 6 | 7.55  | -158.49 | 1.16 | 0.86 | -999 | -999 |
| 6 | 7.79  | -158.39 | 1.03 | -999 | 0.53 | -999 |
| 6 | 7.92  | -158.38 | 0.99 | 0.88 | -999 | -999 |
| 6 | 8.19  | -158.38 | 0.97 | -999 | 0.56 | -999 |
| 6 | 8.33  | -158.38 | 0.78 | 0.89 | -999 | -999 |
| 6 | 8.60  | -158.38 | 0.90 | -999 | 0.60 | -999 |
| 6 | 8.73  | -158.37 | 0.61 | 0.82 | -999 | -999 |
| 6 | 9.00  | -158.36 | 0.83 | -999 | 0.55 | -999 |
| 6 | 9.14  | -158.35 | 0.77 | 0.85 | -999 | -999 |
| 6 | 9.35  | -158.34 | 0.80 | -999 | 0.51 | -999 |
| 6 | 9.39  | -158.31 | 0.61 | 0.87 | -999 | -999 |
| 6 | 9.61  | -158.20 | 0.96 | -999 | 0.51 | -999 |
| 6 | 9.75  | -158.20 | 0.62 | 0.85 | -999 | -999 |
| 6 | 9.95  | -158.05 | 0.73 | -999 | 0.52 | -999 |
| 6 | 9.97  | -158.07 | -999 | -999 | -999 | -999 |
| 6 | 10.17 | -158.03 | 0.83 | -999 | 0.47 | -999 |
| 6 | 10.30 | -157.97 | 0.58 | 0.84 | -999 | -999 |
| 6 | 10.56 | -157.88 | 0.81 | -999 | 0.51 | -999 |
| 6 | 10.69 | -157.88 | 0.57 | 0.88 | -999 | -999 |
| 6 | 10.97 | -157.88 | 0.82 | -999 | 0.54 | -999 |
| 6 | 11.11 | -157.88 | 0.63 | 0.73 | -999 | -999 |
| 6 | 11.38 | -157.88 | 0.75 | -999 | 0.61 | -999 |
| 6 | 11.52 | -157.88 | 0.54 | 0.82 | -999 | -999 |
| 6 | 11.79 | -157.88 | 0.77 | -999 | 0.62 | -999 |
| 6 | 11.93 | -157.88 | 0.50 | 0.89 | -999 | -999 |
| 6 | 12.10 | -157.88 | 0.70 | -999 | 0.50 | -999 |
| 6 | 12.20 | -157.88 | 0.52 | 0.85 | -999 | -999 |
| 6 | 13.16 | -157.76 | 0.61 | -999 | 0.49 | -999 |
| 6 | 13.30 | -157.76 | 0.37 | 0.83 | -999 | -999 |
| 6 | 13.55 | -157.78 | 0.72 | -999 | 0.40 | -999 |
| 6 | 13.69 | -157.78 | 0.33 | 0.73 | -999 | -999 |
| 6 | 13.97 | -157.79 | 0.56 | -999 | 0.42 | -999 |
| 6 | 14.10 | -157.80 | 0.45 | 0.73 | -999 | -999 |
| 6 | 14.37 | -157.82 | 0.56 | -999 | 0.45 | -999 |

|   |       |         |      |      |      |      |
|---|-------|---------|------|------|------|------|
| 6 | 14.51 | -157.81 | 0.38 | 0.86 | -999 | -999 |
| 6 | 14.77 | -157.81 | 0.64 | -999 | 0.44 | -999 |
| 6 | 14.91 | -157.81 | 0.39 | 0.74 | -999 | -999 |
| 6 | 15.09 | -157.81 | 0.61 | -999 | 0.46 | -999 |
| 6 | 15.17 | -157.81 | 0.42 | 0.74 | -999 | -999 |
| 6 | 15.43 | -157.84 | 0.60 | -999 | 0.45 | -999 |
| 6 | 15.56 | -157.86 | 0.39 | 0.85 | -999 | -999 |
| 6 | 15.81 | -157.88 | 0.60 | -999 | 0.53 | -999 |
| 6 | 15.94 | -157.88 | 0.37 | 0.75 | -999 | -999 |
| 6 | 16.24 | -157.88 | 0.57 | -999 | 0.40 | -999 |
| 6 | 16.36 | -157.88 | 0.41 | 0.64 | -999 | -999 |
| 6 | 16.61 | -157.88 | 0.63 | -999 | 0.40 | -999 |
| 6 | 16.73 | -157.88 | 0.42 | 0.69 | -999 | -999 |
| 6 | 16.99 | -157.89 | 0.48 | -999 | 0.46 | -999 |
| 6 | 17.13 | -157.89 | 0.36 | 0.80 | -999 | -999 |
| 6 | 17.39 | -157.88 | 0.55 | -999 | 0.54 | -999 |
| 6 | 17.53 | -157.88 | 0.34 | 0.78 | -999 | -999 |
| 6 | 17.80 | -157.88 | 0.58 | -999 | 0.43 | -999 |
| 6 | 17.94 | -157.88 | 0.38 | 0.77 | -999 | -999 |
| 6 | 18.09 | -157.88 | 0.63 | -999 | 0.54 | -999 |
| 6 | 18.21 | -157.88 | 0.33 | 0.79 | -999 | -999 |
| 6 | 18.47 | -157.88 | 0.67 | -999 | 0.45 | -999 |
| 6 | 18.60 | -157.88 | 0.36 | 0.73 | -999 | -999 |
| 6 | 18.86 | -157.88 | 0.62 | -999 | 0.45 | -999 |
| 6 | 18.99 | -157.88 | 0.41 | 0.95 | -999 | -999 |
| 6 | 19.28 | -157.88 | 0.73 | -999 | 0.36 | -999 |
| 6 | 19.41 | -157.88 | 0.47 | 0.78 | -999 | -999 |
| 6 | 19.68 | -157.88 | 0.74 | -999 | 0.37 | -999 |
| 6 | 19.81 | -157.88 | 0.60 | 0.80 | -999 | -999 |
| 6 | 20.08 | -157.89 | 0.77 | -999 | 0.36 | -999 |
| 6 | 20.21 | -157.89 | 0.62 | 0.84 | -999 | -999 |
| 6 | 21.49 | -157.42 | -999 | -999 | 0.73 | -999 |
| 6 | 21.68 | -157.33 | 0.92 | 0.84 | 0.71 | -999 |
| 6 | 21.97 | -157.19 | -999 | -999 | 0.51 | -999 |
| 6 | 22.11 | -157.13 | 0.63 | 0.77 | 0.61 | -999 |
| 6 | 22.40 | -156.99 | -999 | -999 | 0.51 | -999 |
| 6 | 22.55 | -156.92 | 0.64 | 0.77 | 0.58 | -999 |
| 6 | 22.85 | -156.78 | -999 | -999 | 0.45 | -999 |
| 6 | 23.00 | -156.71 | 0.55 | 0.74 | 0.56 | -999 |
| 6 | 23.31 | -156.56 | -999 | -999 | 0.52 | -999 |
| 6 | 23.46 | -156.49 | 0.64 | 0.70 | 0.56 | -999 |
| 6 | 23.76 | -156.35 | -999 | -999 | 0.46 | -999 |
| 6 | 23.86 | -156.30 | 0.56 | 0.66 | 0.53 | -999 |
| 6 | 24.05 | -156.21 | -999 | -999 | 0.43 | -999 |
| 6 | 24.19 | -156.14 | 0.56 | 0.73 | 0.50 | -999 |
| 6 | 24.49 | -156.00 | -999 | -999 | 0.39 | -999 |
| 6 | 24.65 | -155.92 | 0.53 | 0.71 | 0.42 | -999 |

|   |       |         |      |      |      |      |
|---|-------|---------|------|------|------|------|
| 6 | 24.95 | -155.78 | -999 | -999 | 0.35 | -999 |
| 6 | 25.10 | -155.71 | 0.48 | 0.67 | 0.41 | -999 |
| 6 | 25.40 | -155.56 | -999 | -999 | 0.35 | -999 |
| 6 | 25.55 | -155.49 | 0.56 | 0.74 | 0.37 | -999 |
| 6 | 25.87 | -155.33 | -999 | -999 | 0.36 | -999 |
| 6 | 26.05 | -155.25 | 0.58 | 0.70 | 0.39 | -999 |
| 6 | 26.41 | -155.07 | -999 | -999 | 0.41 | -999 |
| 6 | 26.59 | -154.98 | 0.76 | 0.77 | 0.47 | -999 |
| 6 | 26.94 | -154.81 | -999 | -999 | 0.46 | -999 |
| 6 | 27.12 | -154.72 | 0.86 | 0.85 | 0.55 | -999 |
| 6 | 27.47 | -154.55 | -999 | -999 | 0.48 | -999 |
| 6 | 27.59 | -154.49 | 0.87 | 0.82 | 0.54 | -999 |
| 6 | 27.72 | -154.43 | -999 | -999 | 0.40 | -999 |
| 6 | 27.90 | -154.34 | 0.71 | 0.75 | 0.50 | -999 |
| 6 | 28.30 | -154.14 | -999 | -999 | -999 | -999 |
| 6 | 28.48 | -154.06 | 0.79 | 0.79 | 0.50 | -999 |
| 6 | 28.82 | -153.88 | -999 | -999 | 0.48 | -999 |
| 6 | 29.00 | -153.79 | 0.84 | 0.84 | 0.50 | -999 |
| 6 | 29.36 | -153.62 | -999 | -999 | 0.40 | -999 |
| 6 | 29.52 | -153.54 | 0.93 | 0.78 | 0.44 | -999 |
| 6 | 29.88 | -153.36 | -999 | -999 | 0.33 | -999 |
| 6 | 30.27 | -153.16 | 0.89 | 0.93 | 0.37 | -999 |
| 6 | 30.64 | -152.97 | -999 | -999 | 0.34 | -999 |
| 6 | 30.83 | -152.88 | 0.80 | 0.86 | 0.43 | -999 |
| 6 | 31.18 | -152.70 | -999 | -999 | 0.40 | -999 |
| 6 | 31.36 | -152.60 | 0.98 | 0.85 | 0.43 | -999 |
| 6 | 31.57 | -152.50 | -999 | -999 | 0.37 | -999 |
| 6 | 31.72 | -152.42 | 0.95 | 0.85 | 0.39 | -999 |
| 6 | 32.07 | -152.24 | -999 | -999 | 0.31 | -999 |
| 6 | 32.26 | -152.14 | 1.03 | 0.86 | 0.38 | -999 |
| 6 | 32.64 | -151.95 | -999 | -999 | 0.45 | -999 |
| 6 | 32.82 | -151.85 | 1.15 | 0.84 | 0.60 | -999 |
| 6 | 33.23 | -151.64 | -999 | -999 | 0.44 | -999 |
| 6 | 33.41 | -151.55 | 1.30 | 0.80 | 0.46 | -999 |
| 6 | 33.71 | -151.40 | -999 | -999 | 0.29 | -999 |
| 6 | 33.89 | -151.30 | 1.08 | 0.87 | 0.39 | -999 |
| 6 | 34.25 | -151.11 | -999 | -999 | 0.33 | -999 |
| 6 | 34.43 | -151.01 | 1.19 | 0.90 | 0.41 | -999 |
| 6 | 34.79 | -150.82 | -999 | -999 | 0.39 | -999 |
| 6 | 34.98 | -150.72 | 1.39 | 0.84 | 0.41 | -999 |
| 6 | 35.34 | -150.52 | -999 | -999 | 0.37 | -999 |
| 6 | 35.53 | -150.42 | 1.45 | 0.90 | 0.45 | -999 |
| 6 | 35.70 | -150.34 | -999 | -999 | 0.40 | -999 |
| 6 | 35.88 | -150.24 | 1.27 | 0.90 | 0.42 | -999 |
| 6 | 36.38 | -149.97 | -999 | -999 | 0.35 | -999 |
| 6 | 36.56 | -149.87 | 1.08 | 0.83 | 0.38 | -999 |
| 6 | 36.91 | -149.68 | -999 | -999 | 0.31 | -999 |

|   |       |         |      |      |      |      |
|---|-------|---------|------|------|------|------|
| 6 | 37.09 | -149.58 | 0.97 | 0.80 | 0.40 | -999 |
| 6 | 37.45 | -149.38 | -999 | -999 | 0.31 | -999 |
| 6 | 37.64 | -149.28 | 0.79 | 0.82 | 0.42 | -999 |
| 6 | 38.00 | -149.08 | -999 | -999 | 0.37 | -999 |
| 6 | 38.18 | -148.98 | -999 | -999 | -999 | -999 |
| 6 | 38.58 | -148.94 | -999 | -999 | 0.40 | -999 |
| 6 | 38.78 | -148.94 | 1.04 | 0.82 | 0.45 | -999 |
| 6 | 39.19 | -148.94 | -999 | -999 | 0.48 | -999 |
| 6 | 39.38 | -148.94 | 1.01 | 0.85 | 0.58 | -999 |
| 6 | 39.78 | -148.94 | -999 | -999 | 0.65 | -999 |
| 6 | 39.98 | -148.94 | 1.24 | 0.86 | 0.79 | -999 |
| 6 | 40.18 | -148.94 | -999 | -999 | 0.72 | -999 |
| 6 | 40.38 | -148.94 | 1.20 | 0.89 | 0.74 | -999 |
| 6 | 40.78 | -148.94 | -999 | -999 | 0.76 | -999 |
| 6 | 40.98 | -148.94 | 2.09 | 1.06 | 0.87 | -999 |
| 6 | 41.38 | -148.94 | -999 | -999 | 0.70 | -999 |
| 6 | 41.58 | -148.94 | 2.36 | 1.06 | 0.67 | -999 |
| 6 | 41.99 | -148.94 | -999 | -999 | 0.46 | -999 |
| 6 | 42.19 | -148.94 | 2.25 | 1.07 | 0.53 | -999 |
| 6 | 42.56 | -148.94 | -999 | -999 | 0.48 | -999 |
| 6 | 42.76 | -148.94 | 1.67 | 1.06 | 0.46 | -999 |
| 6 | 43.15 | -148.94 | -999 | -999 | 0.46 | -999 |
| 6 | 43.35 | -148.94 | 1.80 | 0.89 | 0.57 | -999 |
| 6 | 43.75 | -148.94 | -999 | -999 | 0.55 | -999 |
| 6 | 43.95 | -148.94 | 1.63 | 0.97 | 0.53 | -999 |
| 6 | 44.35 | -148.94 | -999 | -999 | 0.47 | -999 |
| 6 | 44.55 | -148.94 | 1.63 | 1.04 | 0.55 | -999 |
| 6 | 44.57 | -148.94 | -999 | -999 | 0.51 | -999 |
| 6 | 44.57 | -148.94 | 1.78 | 0.96 | 0.57 | -999 |
| 6 | 44.57 | -148.83 | -999 | -999 | 0.49 | -999 |
| 6 | 44.57 | -148.64 | 1.53 | 0.96 | 0.52 | -999 |
| 6 | 44.57 | -148.19 | -999 | -999 | 0.48 | -999 |
| 6 | 44.57 | -148.00 | 1.96 | 0.95 | 0.52 | -999 |
| 6 | 44.57 | -147.62 | -999 | -999 | 0.44 | -999 |
| 6 | 44.57 | -147.48 | 1.70 | 1.02 | 0.51 | -999 |
| 6 | 44.57 | -147.48 | -999 | -999 | 0.39 | -999 |
| 6 | 44.57 | -147.29 | 1.49 | 0.98 | 0.43 | -999 |
| 6 | 44.57 | -146.80 | -999 | -999 | 0.37 | -999 |
| 6 | 44.57 | -146.56 | 1.46 | 1.04 | 0.46 | -999 |
| 6 | 44.57 | -146.07 | -999 | -999 | 0.45 | -999 |
| 6 | 44.57 | -145.82 | 1.76 | 0.98 | 0.48 | -999 |
| 6 | 44.58 | -145.33 | -999 | -999 | 0.50 | -999 |
| 6 | 44.58 | -145.09 | 1.69 | 1.00 | 0.53 | -999 |
| 6 | 44.58 | -144.85 | -999 | -999 | 0.46 | -999 |
| 6 | 44.58 | -144.61 | 1.41 | 0.86 | 0.50 | -999 |
| 6 | 44.58 | -144.12 | -999 | -999 | 0.48 | -999 |
| 6 | 44.58 | -143.87 | 1.39 | 0.91 | 0.58 | -999 |

|   |       |         |      |      |      |      |
|---|-------|---------|------|------|------|------|
| 6 | 44.58 | -143.37 | -999 | -999 | 0.54 | -999 |
| 6 | 44.58 | -143.12 | 1.45 | 0.91 | 0.61 | -999 |
| 6 | 44.58 | -142.62 | -999 | -999 | 0.80 | -999 |
| 6 | 44.58 | -142.44 | 1.50 | 0.89 | 0.79 | -999 |
| 6 | 44.58 | -142.44 | -999 | -999 | 0.51 | -999 |
| 6 | 44.58 | -142.44 | 1.72 | 0.96 | 0.52 | -999 |
| 6 | 44.58 | -142.25 | -999 | -999 | 0.45 | -999 |
| 6 | 44.58 | -142.01 | 1.40 | 0.89 | 0.51 | -999 |
| 6 | 44.58 | -141.52 | -999 | -999 | 0.48 | -999 |
| 6 | 44.58 | -141.27 | 1.36 | 0.89 | 0.49 | -999 |
| 6 | 44.58 | -140.84 | -999 | -999 | 0.53 | -999 |
| 6 | 44.58 | -140.77 | 1.23 | 0.87 | 0.52 | -999 |
| 6 | 44.58 | -140.27 | -999 | -999 | 0.36 | -999 |
| 6 | 44.58 | -140.02 | 1.07 | 0.84 | 0.47 | -999 |
| 6 | 44.58 | -139.53 | -999 | -999 | 0.49 | -999 |
| 6 | 44.58 | -138.44 | -999 | -999 | 0.75 | -999 |
| 6 | 44.58 | -138.20 | 1.64 | 0.90 | 0.95 | -999 |
| 6 | 44.58 | -137.73 | -999 | -999 | 1.00 | -999 |
| 6 | 44.58 | -137.48 | 1.63 | 0.92 | 1.03 | -999 |
| 6 | 44.59 | -136.99 | -999 | -999 | 0.85 | -999 |
| 6 | 44.59 | -136.75 | 1.76 | 0.85 | 0.98 | -999 |
| 6 | 44.59 | -136.41 | -999 | -999 | 0.63 | -999 |
| 6 | 44.59 | -136.41 | 1.14 | 0.80 | 0.72 | -999 |
| 6 | 44.59 | -136.41 | -999 | -999 | 0.95 | -999 |
| 6 | 44.59 | -136.41 | 1.50 | 0.91 | 0.77 | -999 |
| 6 | 44.59 | -135.97 | -999 | -999 | 0.75 | -999 |
| 6 | 44.59 | -135.73 | 1.35 | 0.82 | 0.99 | -999 |
| 6 | 44.59 | -135.23 | -999 | -999 | 0.73 | -999 |
| 6 | 44.59 | -134.99 | 1.37 | 0.79 | 0.76 | -999 |
| 6 | 44.59 | -134.49 | -999 | -999 | 0.64 | -999 |
| 6 | 44.59 | -134.25 | 1.25 | 0.87 | 0.69 | -999 |
| 6 | 44.59 | -133.74 | -999 | -999 | 0.63 | -999 |
| 6 | 44.59 | -133.52 | 1.36 | 0.97 | 0.76 | -999 |
| 6 | 44.59 | -133.03 | -999 | -999 | 0.56 | -999 |
| 6 | 44.59 | -132.78 | 1.01 | 0.82 | 0.65 | -999 |
| 6 | 44.59 | -132.29 | -999 | -999 | 0.68 | -999 |
| 6 | 44.59 | -132.05 | 1.33 | 0.75 | 0.73 | -999 |
| 6 | 44.59 | -131.56 | -999 | -999 | 0.62 | -999 |
| 6 | 44.59 | -131.32 | 1.02 | 0.77 | 0.72 | -999 |
| 6 | 44.59 | -130.99 | -999 | -999 | 0.63 | -999 |
| 6 | 44.59 | -130.99 | 1.16 | 0.84 | 0.57 | -999 |
| 6 | 44.59 | -130.98 | -999 | -999 | 0.58 | -999 |
| 6 | 44.59 | -130.98 | 1.29 | 0.92 | 0.65 | -999 |
| 6 | 44.59 | -130.83 | -999 | -999 | 0.68 | -999 |
| 6 | 44.59 | -130.54 | 1.01 | 0.91 | 0.73 | -999 |
| 6 | 44.59 | -129.95 | -999 | -999 | 0.67 | -999 |
| 6 | 44.59 | -129.66 | 1.10 | 0.90 | 0.71 | -999 |



|       |       |         |      |      |      |      |
|-------|-------|---------|------|------|------|------|
| 6     | 44.60 | -129.07 | -999 | -999 | 0.65 | -999 |
| 6     | 44.60 | -128.78 | 0.97 | 0.88 | 0.65 | -999 |
| 6     | 44.60 | -128.18 | -999 | -999 | 0.65 | -999 |
| 6     | 44.60 | -127.89 | 1.05 | 0.87 | 0.66 | -999 |
| 6     | 44.60 | -127.29 | -999 | -999 | 0.59 | -999 |
| 6     | 44.60 | -127.00 | 1.18 | 0.79 | 0.56 | -999 |
| 6     | 44.60 | -126.39 | -999 | -999 | 0.50 | -999 |
| 6     | 44.60 | -126.09 | 1.03 | 0.80 | 0.67 | -999 |
| 6     | 44.58 | -125.49 | -999 | -999 | 0.38 | -999 |
| 6     | 44.59 | -125.21 | 0.83 | 0.76 | 0.37 | -999 |
| 6     | 44.58 | -124.91 | 1.48 | 0.90 | 0.56 | -999 |
| 6     | 44.55 | -124.63 | 2.32 | 1.17 | 0.63 | -999 |
| <hr/> |       |         |      |      |      |      |
| 7     | 10.74 | 172.95  | 0.67 | 0.81 | 0.25 | -999 |
| 7     | 10.83 | 173.20  | 0.44 | 0.87 | 0.37 | -999 |
| 7     | 11.01 | 173.68  | 0.45 | 0.71 | 0.20 | -999 |
| 7     | 11.10 | 173.92  | 0.79 | 0.89 | 0.32 | -999 |
| 7     | 11.27 | 174.39  | 0.49 | 0.73 | 0.17 | -999 |
| 7     | 11.36 | 174.63  | 0.78 | 0.88 | 0.34 | -999 |
| 7     | 11.53 | 175.09  | 0.56 | 0.68 | 0.20 | -999 |
| 7     | 11.62 | 175.33  | 0.79 | 0.91 | 0.36 | -999 |
| 7     | 13.55 | -179.41 | -999 | -999 | -999 | -999 |
| 7     | 13.67 | -179.09 | -999 | -999 | -999 | -999 |
| 7     | 13.84 | -178.61 | -999 | -999 | -999 | -999 |
| 7     | 13.96 | -178.29 | -999 | -999 | -999 | -999 |
| 7     | 14.14 | -177.80 | -999 | -999 | -999 | -999 |
| 7     | 14.26 | -177.47 | -999 | -999 | -999 | -999 |
| 7     | 14.44 | -176.98 | -999 | -999 | -999 | -999 |
| 7     | 14.56 | -176.64 | -999 | -999 | -999 | -999 |
| 7     | 14.75 | -176.14 | -999 | -999 | -999 | -999 |
| 7     | 14.87 | -175.81 | -999 | -999 | -999 | -999 |
| 7     | 15.05 | -175.31 | -999 | -999 | -999 | -999 |
| 7     | 15.17 | -174.98 | -999 | -999 | -999 | -999 |
| 7     | 15.33 | -174.54 | -999 | -999 | -999 | -999 |
| 7     | 15.44 | -174.24 | -999 | -999 | -999 | -999 |
| 7     | 15.60 | -173.79 | -999 | -999 | -999 | -999 |
| 7     | 15.71 | -173.50 | -999 | -999 | -999 | -999 |
| 7     | 15.87 | -173.04 | -999 | -999 | -999 | -999 |
| 7     | 15.99 | -172.73 | -999 | -999 | -999 | -999 |
| 7     | 16.15 | -172.27 | -999 | -999 | -999 | -999 |
| 7     | 16.26 | -171.97 | -999 | -999 | -999 | -999 |
| 7     | 16.43 | -171.51 | -999 | -999 | -999 | -999 |
| 7     | 16.54 | -171.19 | -999 | -999 | -999 | -999 |
| 7     | 16.72 | -170.72 | -999 | -999 | -999 | -999 |
| 7     | 16.83 | -170.40 | -999 | -999 | -999 | -999 |
| 7     | 16.99 | -169.96 | -999 | -999 | -999 | -999 |
| 7     | 17.09 | -169.67 | -999 | -999 | -999 | -999 |
| 7     | 17.24 | -169.25 | -999 | -999 | -999 | -999 |

|   |       |         |      |      |      |      |
|---|-------|---------|------|------|------|------|
| 7 | 17.34 | -168.98 | -999 | -999 | -999 | -999 |
| 7 | 17.49 | -168.56 | -999 | -999 | -999 | -999 |
| 7 | 17.59 | -168.28 | -999 | -999 | -999 | -999 |
| 7 | 17.74 | -167.86 | -999 | -999 | -999 | -999 |
| 7 | 17.85 | -167.57 | -999 | -999 | -999 | -999 |
| 7 | 18.00 | -167.15 | -999 | -999 | -999 | -999 |
| 7 | 18.10 | -166.86 | -999 | -999 | -999 | -999 |
| 7 | 18.26 | -166.41 | -999 | -999 | -999 | -999 |
| 7 | 18.37 | -166.13 | -999 | -999 | -999 | -999 |
| 7 | 18.52 | -165.69 | -999 | -999 | -999 | -999 |
| 7 | 18.61 | -165.43 | -999 | -999 | -999 | -999 |
| 7 | 18.75 | -165.04 | -999 | -999 | -999 | -999 |
| 7 | 18.84 | -164.79 | -999 | -999 | -999 | -999 |
| 7 | 18.98 | -164.41 | -999 | -999 | -999 | -999 |
| 7 | 19.06 | -164.16 | -999 | -999 | -999 | -999 |
| 7 | 19.20 | -163.79 | 0.61 | 0.65 | 0.48 | -999 |
| 7 | 19.26 | -163.61 | 0.37 | 0.82 | 0.55 | -999 |
| 7 | 19.39 | -163.26 | 0.58 | 0.68 | 0.43 | -999 |
| 7 | 19.45 | -163.08 | 0.46 | 0.65 | 0.48 | -999 |
| 7 | 19.57 | -162.74 | 0.39 | 0.79 | 0.47 | -999 |
| 7 | 19.63 | -162.57 | 0.41 | 0.75 | 0.50 | -999 |
| 7 | 19.76 | -162.21 | 0.52 | 0.75 | 0.45 | -999 |
| 7 | 19.83 | -162.02 | 0.51 | 0.75 | 0.53 | -999 |
| 7 | 19.95 | -161.66 | 0.53 | 0.78 | 0.53 | -999 |
| 7 | 20.02 | -161.49 | 0.59 | 0.76 | 0.56 | -999 |
| 7 | 20.14 | -161.13 | 0.58 | 0.72 | 0.53 | -999 |
| 7 | 20.21 | -160.95 | 0.79 | 0.70 | 0.45 | -999 |
| 7 | 20.33 | -160.58 | 0.45 | 0.66 | 0.39 | -999 |
| 7 | 20.40 | -160.41 | 0.71 | 0.69 | 0.54 | -999 |
| 7 | 20.52 | -160.06 | 0.42 | 0.71 | 0.43 | -999 |
| 7 | 20.58 | -159.88 | 0.59 | 0.85 | 0.52 | -999 |
| 7 | 20.71 | -159.52 | 0.41 | 0.70 | 0.49 | -999 |
| 7 | 20.77 | -159.35 | 0.51 | 0.72 | 0.58 | -999 |
| 7 | 20.89 | -159.01 | 0.70 | 0.67 | 0.55 | -999 |
| 7 | 20.95 | -158.83 | 0.57 | 0.73 | 0.62 | -999 |
| 7 | 21.07 | -158.49 | 0.59 | 0.56 | 0.44 | -999 |
| 7 | 21.13 | -158.32 | 0.52 | 0.58 | 0.44 | -999 |
| 7 | 21.22 | -158.06 | 1.07 | 0.78 | 0.58 | -999 |
| 7 | 21.53 | -158.35 | 1.01 | 0.69 | 0.63 | -999 |
| 7 | 21.73 | -158.44 | 0.98 | 0.72 | 0.69 | -999 |
| 7 | 22.18 | -158.65 | 0.46 | 0.69 | 0.57 | -999 |
| 7 | 22.40 | -158.75 | 0.48 | 0.70 | 0.59 | -999 |
| 7 | 22.83 | -158.96 | 0.39 | 0.68 | 0.57 | -999 |
| 7 | 23.05 | -159.06 | 0.40 | 0.72 | 0.67 | -999 |
| 7 | 23.50 | -159.27 | 0.39 | 0.68 | 0.54 | -999 |
| 7 | 23.72 | -159.38 | 0.45 | 0.69 | 0.61 | -999 |
| 7 | 24.16 | -159.59 | 0.46 | 0.67 | 0.51 | -999 |

|   |       |         |      |      |      |      |
|---|-------|---------|------|------|------|------|
| 7 | 24.38 | -159.69 | 0.46 | 0.66 | 0.57 | -999 |
| 7 | 24.81 | -159.90 | 0.38 | 0.64 | 0.51 | -999 |
| 7 | 25.03 | -160.00 | 0.37 | 0.65 | 0.61 | -999 |
| 7 | 25.47 | -160.21 | 0.30 | 0.67 | 0.56 | -999 |
| 7 | 25.67 | -160.30 | 0.35 | 0.68 | 0.63 | -999 |
| 7 | 26.11 | -160.52 | 0.31 | 0.62 | 0.53 | -999 |
| 7 | 26.33 | -160.62 | 0.33 | 0.65 | 0.61 | -999 |
| 7 | 26.77 | -160.84 | 0.30 | 0.68 | 0.52 | -999 |
| 7 | 26.98 | -160.94 | 0.29 | 0.67 | 0.58 | -999 |
| 7 | 27.42 | -161.15 | 0.29 | 0.66 | 0.49 | -999 |
| 7 | 27.63 | -161.26 | 0.30 | 0.64 | 0.57 | -999 |
| 7 | 28.05 | -161.46 | 0.29 | 0.68 | 0.52 | -999 |
| 7 | 28.27 | -161.57 | 0.33 | 0.70 | 0.60 | -999 |
| 7 | 28.69 | -161.78 | 0.30 | 0.66 | 0.52 | -999 |
| 7 | 28.90 | -161.89 | 0.29 | 0.71 | 0.57 | -999 |
| 7 | 29.34 | -162.10 | 0.32 | 0.66 | 0.50 | -999 |
| 7 | 29.56 | -162.21 | 0.33 | 0.68 | 0.55 | -999 |
| 7 | 29.99 | -162.42 | 0.31 | 0.68 | 0.48 | -999 |
| 7 | 30.19 | -162.52 | 0.38 | 0.67 | 0.54 | -999 |
| 7 | 30.63 | -162.75 | 0.30 | 0.69 | 0.51 | -999 |
| 7 | 30.85 | -162.86 | 0.35 | 0.67 | 0.54 | -999 |
| 7 | 31.27 | -163.07 | 0.29 | 0.65 | 0.53 | -999 |
| 7 | 31.49 | -163.18 | 0.30 | 0.65 | 0.57 | -999 |
| 7 | 31.90 | -163.39 | 0.33 | 0.67 | 0.48 | -999 |
| 7 | 32.11 | -163.50 | -999 | -999 | -999 | -999 |
| 7 | 32.73 | -163.81 | 0.31 | 0.63 | 0.53 | -999 |
| 7 | 32.94 | -163.92 | 0.31 | 0.65 | 0.55 | -999 |
| 7 | 33.36 | -164.14 | 0.30 | 0.64 | 0.59 | -999 |
| 7 | 33.57 | -164.25 | 0.31 | 0.64 | 0.64 | -999 |
| 7 | 33.96 | -164.46 | 0.33 | 0.66 | 0.61 | -999 |
| 7 | 34.17 | -164.56 | 0.33 | 0.69 | 0.67 | -999 |
| 7 | 34.57 | -164.77 | -999 | -999 | -999 | -999 |
| 7 | 34.76 | -164.87 | 0.34 | 0.68 | 0.64 | -999 |
| 7 | 34.97 | -165.00 | 0.31 | 0.71 | 0.49 | -999 |
| 7 | 34.91 | -164.92 | 0.41 | 0.67 | 0.66 | -999 |
| 7 | 34.99 | -164.91 | 0.39 | 0.69 | 0.52 | -999 |
| 7 | 34.93 | -164.95 | 0.31 | 0.66 | 0.52 | -999 |
| 7 | 34.98 | -164.92 | 0.33 | 0.66 | 0.58 | -999 |
| 7 | 34.94 | -164.90 | 0.34 | 0.67 | 0.52 | -999 |
| 7 | 34.94 | -164.90 | 0.31 | 0.63 | 0.59 | -999 |
| 7 | 34.94 | -164.90 | 0.32 | 0.66 | 0.37 | -999 |
| 7 | 35.27 | -165.00 | 0.33 | 0.64 | 0.51 | -999 |
| 7 | 35.50 | -165.00 | 0.35 | 0.66 | 0.58 | -999 |
| 7 | 35.95 | -165.00 | 0.38 | 0.65 | 0.53 | -999 |
| 7 | 36.18 | -165.00 | 0.34 | 0.67 | 0.56 | -999 |
| 7 | 36.64 | -165.00 | 0.37 | 0.65 | 0.56 | -999 |
| 7 | 36.86 | -165.00 | 0.34 | 0.67 | 0.56 | -999 |

|   |       |         |      |      |      |      |
|---|-------|---------|------|------|------|------|
| 7 | 37.31 | -165.00 | 0.49 | 0.76 | 0.58 | -999 |
| 7 | 37.53 | -165.00 | 0.62 | 0.88 | 0.63 | -999 |
| 7 | 37.99 | -165.00 | -999 | -999 | -999 | -999 |
| 7 | 38.22 | -165.00 | 0.70 | 0.92 | 0.64 | -999 |
| 7 | 38.68 | -165.00 | 0.76 | 0.92 | 0.78 | -999 |
| 7 | 38.91 | -165.00 | 0.69 | 0.85 | 0.60 | -999 |
| 7 | 39.38 | -165.00 | 0.69 | 0.84 | 0.60 | -999 |
| 7 | 39.61 | -165.00 | 0.77 | 0.87 | 0.63 | -999 |
| 7 | 40.06 | -165.00 | 0.71 | 0.82 | 0.66 | -999 |
| 7 | 40.30 | -165.00 | 0.81 | 0.86 | 0.77 | -999 |
| 7 | 40.76 | -165.00 | 0.78 | 0.86 | 0.82 | -999 |
| 7 | 41.00 | -165.00 | 0.78 | 0.91 | 0.83 | -999 |
| 7 | 41.47 | -165.00 | 0.97 | 0.94 | 0.79 | -999 |
| 7 | 41.69 | -165.00 | 1.20 | 0.99 | 0.88 | -999 |
| 7 | 42.12 | -165.00 | 1.20 | 1.00 | 0.84 | -999 |
| 7 | 42.35 | -165.00 | 1.18 | 0.92 | 0.84 | -999 |
| 7 | 42.82 | -165.00 | 1.19 | 0.96 | 0.79 | -999 |
| 7 | 43.05 | -165.00 | 1.23 | 0.95 | 0.83 | -999 |
| 7 | 43.53 | -165.00 | 0.94 | 0.91 | 0.73 | -999 |
| 7 | 43.78 | -165.00 | 0.90 | 0.91 | 0.74 | -999 |
| 7 | 44.27 | -165.00 | 0.90 | 0.93 | 0.77 | -999 |
| 7 | 44.49 | -165.00 | 1.03 | 1.04 | 1.15 | -999 |
| 7 | 44.92 | -165.00 | 0.91 | 0.92 | 0.64 | -999 |
| 7 | 45.13 | -165.00 | 0.91 | 0.94 | 0.60 | -999 |
| 7 | 45.56 | -165.00 | 1.18 | 1.05 | 0.80 | -999 |
| 7 | 45.79 | -165.00 | 1.32 | 1.03 | 0.82 | -999 |
| 7 | 46.25 | -165.00 | 1.44 | 1.13 | 0.99 | -999 |
| 7 | 46.48 | -165.00 | 1.43 | 1.07 | 0.98 | -999 |
| 7 | 46.91 | -165.00 | 1.29 | 1.07 | 0.94 | -999 |
| 7 | 47.13 | -165.00 | 1.33 | 1.12 | 0.90 | -999 |
| 7 | 47.59 | -165.00 | 1.33 | 1.15 | 0.82 | -999 |
| 7 | 47.82 | -165.00 | 1.44 | 1.15 | 0.99 | -999 |
| 7 | 48.27 | -165.00 | 1.18 | 1.06 | 0.76 | -999 |
| 7 | 48.49 | -165.00 | 1.12 | 1.02 | 0.69 | -999 |
| 7 | 48.95 | -165.00 | 1.31 | 1.10 | 0.63 | -999 |
| 7 | 49.18 | -165.00 | 1.24 | 1.12 | 0.56 | -999 |
| 7 | 49.64 | -165.00 | 1.14 | 1.07 | 0.48 | -999 |
| 7 | 49.86 | -165.00 | 1.19 | 0.99 | 0.46 | -999 |
| 7 | 50.07 | -165.05 | 1.35 | 1.05 | 0.49 | -999 |
| 7 | 50.27 | -165.07 | 1.13 | 1.03 | 0.47 | -999 |
| 7 | 50.50 | -164.95 | 1.09 | 0.97 | 0.47 | -999 |
| 7 | 50.57 | -165.06 | 1.16 | 1.01 | 0.53 | -999 |
| 7 | 50.43 | -165.00 | 1.14 | 0.99 | 0.45 | -999 |
| 7 | 50.53 | -164.87 | 1.09 | 1.02 | 0.49 | -999 |
| 7 | 50.53 | -164.90 | 1.16 | 1.07 | 0.49 | -999 |
| 7 | 50.54 | -164.96 | 1.23 | 1.09 | 0.54 | -999 |
| 7 | 50.53 | -164.94 | 1.24 | 1.13 | 0.69 | -999 |

|   |       |         |      |      |      |      |
|---|-------|---------|------|------|------|------|
| 7 | 50.53 | -164.92 | 1.23 | 1.10 | 0.83 | -999 |
| 7 | 50.78 | -165.07 | 1.21 | 1.09 | 0.74 | -999 |
| 7 | 51.01 | -165.15 | 1.14 | 1.07 | 0.84 | -999 |
| 7 | 51.47 | -165.28 | 1.23 | 0.95 | 1.08 | -999 |
| 7 | 51.70 | -165.35 | 1.09 | 0.95 | 0.72 | -999 |
| 7 | 52.17 | -165.48 | 1.22 | 0.98 | 0.91 | -999 |
| 7 | 52.40 | -165.55 | 1.21 | 1.01 | 0.93 | -999 |
| 7 | 52.84 | -165.68 | 1.28 | 1.04 | 1.01 | -999 |
| 7 | 53.06 | -165.75 | 1.63 | 1.14 | 0.73 | -999 |
| 7 | 53.47 | -165.88 | 1.63 | 1.09 | 0.62 | -999 |
| 7 | 53.68 | -165.94 | 1.54 | 1.10 | 0.59 | -999 |
| 7 | 54.02 | -166.32 | 1.66 | 1.05 | 0.64 | -999 |
| 7 | 54.34 | -165.93 | 1.71 | 1.32 | 0.70 | -999 |
| 7 | 54.33 | -165.55 | 1.74 | 1.28 | 0.68 | -999 |
| 7 | 54.15 | -164.84 | 1.93 | 1.33 | 0.70 | -999 |
| 7 | 54.06 | -164.46 | 1.99 | 1.39 | 0.72 | -999 |
| 7 | 53.92 | -163.73 | 1.73 | 1.30 | 0.69 | -999 |
| 7 | 53.84 | -163.37 | 1.80 | 1.27 | 0.68 | -999 |
| 7 | 53.68 | -162.67 | 1.13 | 1.01 | 0.50 | -999 |
| 7 | 53.60 | -162.33 | 1.10 | 1.01 | 0.54 | -999 |
| 7 | 53.46 | -161.62 | 1.20 | 1.05 | 0.59 | -999 |
| 7 | 53.38 | -161.25 | 1.56 | 1.18 | 0.81 | -999 |
| 7 | 53.21 | -160.49 | 1.55 | 1.12 | 0.78 | -999 |
| 7 | 53.13 | -160.12 | 1.54 | 1.11 | 0.77 | -999 |
| 7 | 52.98 | -159.43 | 1.52 | 1.11 | 0.78 | -999 |
| 7 | 52.90 | -159.06 | 1.54 | 1.14 | 0.82 | -999 |
| 7 | 52.75 | -158.35 | 1.43 | 1.10 | 0.86 | -999 |
| 7 | 52.67 | -158.00 | 1.38 | 1.13 | 0.88 | -999 |
| 7 | 52.63 | -157.29 | 1.37 | 1.13 | 0.79 | -999 |
| 7 | 52.64 | -157.33 | 1.33 | 1.11 | 0.81 | -999 |
| 7 | 52.63 | -157.42 | 1.30 | 1.08 | 0.67 | -999 |
| 7 | 52.63 | -157.35 | 1.29 | 1.06 | 0.61 | -999 |
| 7 | 52.66 | -156.89 | 1.19 | 1.04 | 0.59 | -999 |
| 7 | 52.67 | -156.89 | 1.22 | 1.05 | 0.68 | -999 |
| 7 | 52.66 | -156.92 | 1.29 | 1.11 | 0.81 | -999 |
| 7 | 52.65 | -156.95 | 1.58 | 1.18 | 0.85 | -999 |
| 7 | 52.62 | -157.01 | 1.59 | 1.26 | 0.82 | -999 |
| 7 | 52.60 | -157.05 | 1.55 | 1.33 | 0.96 | -999 |
| 7 | 52.62 | -157.10 | 2.19 | 1.12 | 0.86 | -999 |
| 7 | 52.63 | -157.11 | 2.26 | 1.07 | 0.82 | -999 |
| 7 | 52.67 | -156.87 | 2.18 | 1.23 | 0.81 | -999 |
| 7 | 52.67 | -156.88 | 2.21 | 1.29 | 0.81 | -999 |
| 7 | 52.66 | -156.89 | 1.93 | 1.24 | 0.73 | -999 |
| 7 | 52.66 | -156.94 | 1.72 | 1.19 | 0.63 | -999 |
| 7 | 52.66 | -156.93 | 1.88 | 1.11 | 0.64 | -999 |
| 7 | 52.64 | -156.89 | 1.78 | 1.15 | 0.60 | -999 |
| 7 | 52.62 | -156.92 | 1.69 | 1.06 | 0.56 | -999 |

|   |       |         |      |      |      |      |
|---|-------|---------|------|------|------|------|
| 7 | 52.50 | -156.72 | 1.56 | 1.07 | 0.55 | -999 |
| 7 | 52.24 | -156.32 | 1.56 | 1.09 | 0.57 | -999 |
| 7 | 52.14 | -156.28 | 1.55 | 1.05 | 0.57 | -999 |
| 7 | 52.08 | -156.54 | 1.52 | 1.05 | 0.53 | -999 |
| 7 | 52.05 | -156.65 | 1.55 | 1.09 | 0.57 | -999 |
| 7 | 52.13 | -156.88 | 1.56 | 1.13 | 0.63 | -999 |
| 7 | 52.11 | -156.81 | 1.44 | 1.09 | 0.59 | -999 |
| 7 | 52.10 | -156.78 | 1.57 | 1.15 | 0.60 | -999 |
| 7 | 52.10 | -156.80 | 1.59 | 1.19 | 0.64 | -999 |
| 7 | 52.08 | -156.74 | 1.43 | 1.06 | 0.55 | -999 |
| 7 | 52.09 | -156.74 | 1.41 | 1.04 | 0.53 | -999 |
| 7 | 52.09 | -156.67 | 1.28 | 0.96 | 0.57 | -999 |
| 7 | 52.08 | -156.63 | 1.16 | 0.91 | 0.44 | -999 |
| 7 | 52.09 | -156.67 | 1.12 | 0.92 | 0.41 | -999 |
| 7 | 52.09 | -156.60 | 1.08 | -999 | 0.38 | -999 |
| 7 | 52.08 | -156.69 | 1.20 | 0.96 | 0.39 | -999 |
| 7 | 52.08 | -156.69 | 1.20 | 1.02 | 0.43 | -999 |
| 7 | 52.08 | -156.69 | 1.17 | 1.00 | 0.48 | -999 |
| 7 | 52.08 | -156.69 | 1.26 | 1.04 | 0.52 | -999 |
| 7 | 52.08 | -156.69 | 1.22 | 1.00 | 0.47 | -999 |
| 7 | 52.08 | -156.68 | 1.18 | 0.98 | 0.44 | -999 |
| 7 | 52.08 | -156.65 | 1.23 | 1.00 | 0.42 | -999 |
| 7 | 52.08 | -156.65 | -999 | 1.05 | 0.45 | -999 |
| 7 | 52.00 | -156.15 | 1.19 | 1.00 | 0.45 | -999 |
| 7 | 51.93 | -155.75 | -999 | 1.05 | 0.60 | -999 |
| 7 | 51.79 | -154.97 | -999 | 1.02 | 0.43 | -999 |
| 7 | 51.72 | -154.58 | 1.20 | 0.94 | 0.47 | -999 |
| 7 | 51.58 | -153.80 | 1.21 | 1.01 | 0.46 | -999 |
| 7 | 51.51 | -153.40 | 1.13 | 1.00 | 0.48 | -999 |
| 7 | 51.38 | -152.63 | 1.19 | 0.98 | 0.52 | -999 |
| 7 | 51.31 | -152.24 | 1.25 | 0.99 | 0.52 | -999 |
| 7 | 51.17 | -151.46 | 1.14 | 0.95 | 0.45 | -999 |
| 7 | 51.10 | -151.08 | 1.24 | 0.99 | 0.47 | -999 |
| 7 | 50.96 | -150.32 | -999 | 1.07 | 0.49 | -999 |
| 7 | 50.90 | -149.94 | 1.15 | 1.00 | 0.46 | -999 |
| 7 | 50.77 | -149.22 | 1.04 | 0.98 | 0.46 | -999 |
| 7 | 50.72 | -148.96 | 1.03 | 0.96 | 0.46 | -999 |
| 7 | 50.74 | -149.05 | 1.07 | 0.95 | 0.49 | -999 |
| 7 | 50.75 | -149.06 | 1.10 | 0.91 | 0.47 | -999 |
| 7 | 50.66 | -148.61 | 1.21 | 0.93 | 0.47 | -999 |
| 7 | 50.58 | -148.22 | 1.10 | 0.94 | 0.50 | -999 |
| 7 | 50.45 | -147.45 | 0.98 | 0.95 | 0.51 | -999 |
| 7 | 50.38 | -147.07 | 1.04 | 0.98 | 0.56 | -999 |
| 7 | 50.24 | -146.33 | 1.05 | 0.93 | 0.58 | -999 |
| 7 | 50.17 | -145.95 | 1.07 | 0.97 | 0.63 | -999 |
| 7 | 50.04 | -145.20 | -999 | -999 | -999 | -999 |
| 7 | 50.00 | -145.00 | 1.03 | 0.93 | 0.49 | -999 |

|   |       |         |      |      |      |      |
|---|-------|---------|------|------|------|------|
| 7 | 50.00 | -145.00 | 1.00 | 0.92 | 0.49 | -999 |
| 7 | 50.00 | -145.00 | 0.93 | 0.88 | 0.44 | -999 |
| 7 | 50.00 | -144.99 | 0.97 | 0.91 | 0.45 | -999 |
| 7 | 50.04 | -144.82 | 0.94 | 0.95 | 0.42 | -999 |
| 7 | 50.03 | -144.87 | 0.94 | 0.95 | 0.46 | -999 |
| 7 | 50.02 | -144.92 | 0.93 | 0.97 | 0.47 | -999 |
| 7 | 49.99 | -145.02 | 0.92 | 0.92 | 0.45 | -999 |
| 7 | 49.98 | -145.07 | 0.91 | 0.97 | 0.45 | -999 |
| 7 | 50.03 | -144.89 | 0.91 | 0.92 | 0.39 | -999 |
| 7 | 50.03 | -144.91 | 0.93 | 0.94 | 0.54 | -999 |
| 7 | 50.12 | -144.94 | 0.90 | 0.92 | 0.47 | -999 |
| 7 | 50.10 | -144.99 | 0.89 | 0.94 | 0.51 | -999 |
| 7 | 50.00 | -145.20 | 0.87 | 0.97 | 0.46 | -999 |
| 7 | 50.00 | -145.31 | 0.85 | 0.97 | 0.51 | -999 |
| 7 | 50.00 | -145.47 | 0.85 | 0.90 | 0.59 | -999 |
| 7 | 49.99 | -145.59 | 0.85 | 0.96 | 0.69 | -999 |
| 7 | 50.00 | -145.84 | 1.08 | 1.04 | 0.77 | -999 |
| 7 | 50.00 | -145.94 | 1.15 | 1.07 | 0.81 | -999 |
| 7 | 50.00 | -146.16 | 1.17 | 0.84 | 0.84 | -999 |
| 7 | 50.00 | -146.25 | 1.16 | 0.93 | 0.81 | -999 |
| 7 | 50.00 | -146.50 | 1.13 | 1.30 | 0.84 | -999 |
| 7 | 50.00 | -146.57 | 1.10 | 1.16 | 0.90 | -999 |
| 7 | 50.27 | -146.15 | -999 | 1.09 | 0.92 | -999 |
| 7 | 50.44 | -145.89 | -999 | 1.03 | 0.96 | -999 |
| 7 | 50.77 | -145.37 | -999 | 1.04 | 0.84 | -999 |
| 7 | 50.94 | -145.10 | -999 | 1.06 | 0.90 | -999 |
| 7 | 50.89 | -145.00 | 1.19 | 1.07 | 0.80 | -999 |
| 7 | 50.80 | -145.00 | -999 | -999 | 0.85 | -999 |
| 7 | 50.60 | -145.00 | 1.21 | 1.06 | 0.83 | -999 |
| 7 | 50.51 | -145.00 | 1.18 | 1.04 | 0.81 | -999 |
| 7 | 50.32 | -145.00 | 1.12 | 1.02 | 0.72 | -999 |
| 7 | 50.29 | -145.00 | 1.20 | 1.06 | 0.76 | -999 |
| 7 | 50.10 | -145.00 | 1.31 | 1.05 | 0.56 | -999 |
| 7 | 50.08 | -145.00 | 1.28 | 1.05 | 0.57 | -999 |
| 7 | 50.03 | -144.88 | 1.46 | 1.16 | 0.69 | -999 |
| 7 | 50.03 | -144.89 | 1.68 | 1.20 | 0.73 | -999 |
| 7 | 49.93 | -145.01 | 1.58 | 1.15 | 0.70 | -999 |
| 7 | 49.87 | -145.09 | 1.60 | 1.18 | 0.73 | -999 |
| 7 | 49.77 | -145.29 | -999 | -999 | -999 | -999 |
| 7 | 49.76 | -145.34 | -999 | -999 | -999 | -999 |
| 7 | 49.74 | -145.40 | -999 | -999 | -999 | -999 |
| 7 | 50.51 | -148.81 | 1.25 | 1.08 | 0.60 | -999 |
| 7 | 50.56 | -149.03 | 1.31 | 1.03 | 0.57 | -999 |
| 7 | 50.66 | -149.52 | 1.24 | 1.07 | 0.55 | -999 |
| 7 | 50.71 | -149.78 | 1.23 | 1.07 | 0.57 | -999 |
| 7 | 50.84 | -150.43 | 1.24 | 1.06 | 0.56 | -999 |
| 7 | 50.91 | -150.76 | 1.29 | 1.07 | 0.58 | -999 |

|   |       |         |      |      |      |      |
|---|-------|---------|------|------|------|------|
| 7 | 51.04 | -151.42 | 1.25 | 1.04 | 0.56 | -999 |
| 7 | 51.11 | -151.73 | 1.20 | 1.10 | 0.58 | -999 |
| 7 | 51.24 | -152.39 | 1.24 | 1.07 | 0.55 | -999 |
| 7 | 51.30 | -152.73 | 1.37 | 1.04 | 0.55 | -999 |
| 7 | 51.45 | -153.43 | 2.76 | 1.10 | 0.57 | -999 |
| 7 | 51.52 | -153.78 | -999 | 1.10 | 0.60 | -999 |
| 7 | 51.66 | -154.49 | 2.30 | 1.09 | 0.68 | -999 |
| 7 | 51.73 | -154.85 | 1.69 | 1.02 | 0.64 | -999 |
| 7 | 51.87 | -155.56 | -999 | -999 | -999 | -999 |
| 7 | 51.98 | -156.11 | 1.89 | 1.00 | 0.59 | -999 |
| 7 | 52.09 | -156.66 | 2.26 | 1.03 | 0.54 | -999 |
| 7 | 52.10 | -156.65 | 1.90 | 1.06 | 0.57 | -999 |
| 7 | 52.24 | -156.50 | 1.44 | 1.08 | 0.65 | -999 |
| 7 | 52.24 | -156.47 | 1.41 | 1.07 | 0.74 | -999 |
| 7 | 52.27 | -156.42 | 1.45 | 1.11 | 0.81 | -999 |
| 7 | 52.35 | -156.34 | 1.46 | 1.14 | 0.93 | -999 |
| 7 | 52.61 | -156.08 | 1.42 | 1.05 | 1.26 | -999 |
| 7 | 52.70 | -156.00 | 1.29 | 1.03 | 1.29 | -999 |
| 7 | 52.81 | -155.97 | 1.17 | 1.02 | 1.30 | -999 |
| 7 | 52.91 | -155.93 | 1.20 | 1.03 | 1.22 | -999 |
| 7 | 53.23 | -155.77 | 1.23 | 1.10 | 1.26 | -999 |
| 7 | 53.33 | -155.72 | 1.25 | 1.10 | 1.32 | -999 |
| 7 | 53.44 | -155.67 | 1.25 | 1.06 | 1.36 | -999 |
| 7 | 53.53 | -155.59 | 1.23 | 1.12 | 1.37 | -999 |
| 7 | 53.79 | -155.26 | 1.23 | 1.08 | 1.42 | -999 |
| 7 | 53.89 | -155.16 | 1.23 | 1.09 | 1.44 | -999 |
| 7 | 53.95 | -155.07 | 1.17 | 1.13 | 1.47 | -999 |
| 7 | 53.96 | -155.08 | 1.20 | 1.07 | 1.51 | -999 |
| 7 | 54.18 | -154.89 | 1.19 | 1.10 | 1.55 | -999 |
| 7 | 54.37 | -154.74 | 1.23 | 1.08 | 1.54 | -999 |
| 7 | 54.75 | -154.43 | 1.48 | 1.04 | 1.58 | -999 |
| 7 | 54.93 | -154.28 | 1.93 | 1.08 | 1.57 | -999 |
| 7 | 55.29 | -153.97 | -999 | 1.02 | 0.89 | -999 |
| 7 | 55.47 | -153.82 | -999 | 1.05 | 0.88 | -999 |
| 7 | 55.81 | -153.50 | -999 | 1.06 | 0.79 | -999 |
| 7 | 55.99 | -153.35 | -999 | 1.06 | 0.79 | -999 |
| 7 | 56.34 | -153.04 | 1.92 | 1.24 | 0.69 | -999 |
| 7 | 56.50 | -152.90 | 2.58 | 1.25 | 0.65 | -999 |
| 7 | 56.83 | -152.60 | 3.19 | 1.23 | 0.54 | -999 |
| 7 | 57.00 | -152.45 | 3.21 | 1.20 | 0.52 | -999 |
| 7 | 57.34 | -152.14 | 3.06 | 1.21 | 0.43 | -999 |
| 7 | 57.52 | -152.02 | 3.20 | 1.26 | 0.45 | -999 |
| 7 | 57.72 | -152.24 | 2.78 | 1.14 | 0.39 | -999 |
| 7 | 57.73 | -152.39 | 2.91 | 1.15 | 0.39 | -999 |
| 7 | 57.74 | -152.45 | 2.89 | 1.15 | 0.39 | -999 |
| 7 | 57.74 | -152.45 | 2.75 | 1.13 | 0.40 | -999 |
| 7 | 57.74 | -152.43 | 2.85 | 1.14 | 0.41 | -999 |



|   |       |         |      |      |      |      |
|---|-------|---------|------|------|------|------|
| 7 | 57.72 | -152.26 | 2.93 | 1.25 | 0.49 | -999 |
| 7 | 57.70 | -152.10 | 2.82 | 1.24 | 0.45 | -999 |
| 7 | 57.43 | -151.46 | 2.42 | 1.26 | 0.54 | -999 |
| 7 | 57.28 | -151.15 | 2.40 | 1.25 | 0.64 | -999 |
| 7 | 56.97 | -150.49 | 1.98 | 1.10 | 0.64 | -999 |
| 7 | 56.82 | -150.18 | 2.07 | 1.21 | 0.61 | -999 |
| 7 | 56.51 | -149.55 | 1.82 | 1.08 | 0.56 | -999 |
| 7 | 56.36 | -149.24 | 1.82 | 1.09 | 0.63 | -999 |
| 7 | 56.07 | -148.65 | 1.68 | 1.10 | 1.00 | -999 |
| 7 | 55.92 | -148.36 | 1.60 | 1.08 | 1.03 | -999 |
| 7 | 55.64 | -147.77 | 1.61 | 1.08 | 1.04 | -999 |
| 7 | 55.50 | -147.48 | 1.62 | 1.10 | 1.04 | -999 |
| 7 | 55.21 | -146.92 | 1.58 | 1.08 | 1.06 | -999 |
| 7 | 55.06 | -146.62 | 1.65 | 1.11 | 0.99 | -999 |
| 7 | 55.01 | -146.51 | 1.63 | 1.09 | 1.00 | -999 |
| 7 | 54.82 | -146.45 | 1.57 | 1.08 | 1.04 | -999 |
| 7 | 54.41 | -146.32 | 1.47 | 1.04 | 1.08 | -999 |
| 7 | 54.20 | -146.26 | 1.34 | 0.98 | 1.49 | -999 |
| 7 | 53.78 | -146.14 | 1.21 | 0.96 | 1.54 | -999 |
| 7 | 53.57 | -146.08 | 1.24 | 0.98 | 1.52 | -999 |
| 7 | 53.15 | -145.96 | 1.14 | 0.97 | 1.45 | -999 |
| 7 | 52.95 | -145.90 | 1.11 | 1.01 | 1.39 | -999 |
| 7 | 52.55 | -145.79 | 1.09 | 0.99 | 1.26 | -999 |
| 7 | 52.37 | -145.73 | 1.19 | 1.02 | 1.27 | -999 |
| 7 | 52.00 | -145.62 | 1.16 | 1.01 | 1.18 | -999 |
| 7 | 51.81 | -145.54 | 1.18 | 0.99 | 1.17 | -999 |
| 7 | 51.43 | -145.41 | 1.09 | 0.98 | 1.18 | -999 |
| 7 | 51.23 | -145.35 | 1.05 | 0.96 | 1.19 | -999 |
| 7 | 50.86 | -145.25 | 0.94 | 0.95 | 1.14 | -999 |
| 7 | 50.65 | -145.19 | 0.99 | 0.95 | 1.20 | -999 |
| 7 | 50.24 | -145.07 | 0.98 | 0.95 | 1.24 | -999 |
| 7 | 50.04 | -145.01 | 0.98 | 1.00 | 1.26 | -999 |
| 7 | 49.90 | -145.00 | 0.98 | 0.99 | 1.29 | -999 |
| 7 | 49.85 | -145.00 | 0.93 | 0.96 | 1.33 | -999 |
| 7 | 49.70 | -145.00 | 0.99 | 0.98 | 1.40 | -999 |
| 7 | 49.63 | -145.00 | 1.00 | 1.00 | 1.45 | -999 |
| 7 | 49.83 | -144.91 | 1.09 | 0.98 | 1.47 | -999 |
| 7 | 50.00 | -144.84 | 1.10 | 1.00 | 1.47 | -999 |
| 7 | 50.00 | -144.62 | 1.07 | 0.98 | 1.46 | -999 |
| 7 | 50.00 | -144.53 | 1.00 | 0.94 | 1.47 | -999 |
| 7 | 50.00 | -144.20 | 0.90 | 0.93 | 1.42 | -999 |
| 7 | 50.00 | -144.06 | 0.87 | 0.93 | 1.45 | -999 |
| 7 | 50.00 | -143.58 | 0.87 | 0.92 | 1.35 | -999 |
| 7 | 50.00 | -143.43 | 0.87 | 0.93 | 1.29 | -999 |
| 7 | 50.13 | -143.24 | 0.93 | 0.91 | 1.30 | -999 |
| 7 | 50.29 | -142.95 | 0.97 | 0.93 | 1.37 | -999 |
| 7 | 50.62 | -142.39 | 0.95 | 0.96 | 1.40 | -999 |

|   |       |         |      |      |      |      |
|---|-------|---------|------|------|------|------|
| 7 | 50.79 | -142.10 | 0.98 | 0.96 | 1.27 | -999 |
| 7 | 51.11 | -141.54 | 0.97 | 0.99 | 1.09 | -999 |
| 7 | 51.28 | -141.26 | 1.07 | 1.04 | 1.01 | -999 |
| 7 | 51.60 | -140.71 | 1.22 | 1.03 | 0.95 | -999 |
| 7 | 51.75 | -140.44 | 1.26 | 1.07 | 0.93 | -999 |
| 7 | 51.96 | -140.07 | 1.27 | 1.04 | 0.75 | -999 |
| 7 | 51.91 | -139.98 | 1.27 | 1.06 | 0.75 | -999 |
| 7 | 51.68 | -139.35 | 1.26 | 1.03 | 0.76 | -999 |
| 7 | 51.58 | -139.04 | 1.19 | 1.04 | 0.84 | -999 |
| 7 | 51.38 | -138.42 | 1.08 | 1.03 | 0.79 | -999 |
| 7 | 51.26 | -138.13 | 1.01 | 0.97 | 0.85 | -999 |
| 7 | 51.04 | -137.58 | 0.98 | 0.97 | 0.95 | -999 |
| 7 | 50.98 | -137.43 | 1.00 | 0.97 | 0.53 | -999 |
| 7 | 50.92 | -137.28 | 0.98 | 0.94 | 0.88 | -999 |
| 7 | 50.86 | -137.13 | 0.97 | 0.91 | 1.49 | -999 |
| 7 | 50.68 | -136.67 | 0.84 | 0.95 | 1.20 | -999 |
| 7 | 50.55 | -136.36 | 0.82 | 0.93 | 1.21 | -999 |
| 7 | 50.31 | -135.74 | 0.75 | 0.92 | 1.11 | -999 |
| 7 | 50.18 | -135.44 | 0.75 | 0.86 | 1.13 | -999 |
| 7 | 50.05 | -134.98 | 0.68 | 0.83 | 0.96 | -999 |
| 7 | 50.02 | -134.98 | 0.72 | 0.87 | 0.95 | -999 |
| 7 | 50.00 | -134.92 | 0.68 | 0.80 | 0.89 | -999 |
| 7 | 49.91 | -134.59 | 0.69 | 0.85 | 0.91 | -999 |
| 7 | 49.73 | -133.93 | 0.71 | 0.88 | 1.12 | -999 |
| 7 | 49.63 | -133.60 | -999 | 0.98 | 1.29 | -999 |
| 7 | 49.46 | -132.94 | 0.83 | 0.92 | 1.02 | -999 |
| 7 | 49.37 | -132.61 | 0.78 | 0.91 | 1.07 | -999 |
| 7 | 49.20 | -131.98 | 0.68 | 0.86 | 0.74 | -999 |
| 7 | 49.12 | -131.65 | 0.69 | 0.86 | 0.76 | -999 |
| 7 | 48.97 | -130.98 | 0.66 | 0.87 | 0.78 | -999 |
| 7 | 48.90 | -130.64 | 0.64 | 0.83 | 0.90 | -999 |
| 7 | 48.81 | -129.97 | 0.71 | 0.86 | 0.84 | -999 |
| 7 | 48.73 | -129.63 | 0.63 | 0.80 | 0.78 | -999 |
| 7 | 48.52 | -129.24 | 0.75 | 0.88 | 0.80 | -999 |
| 7 | 48.63 | -129.52 | 0.75 | 0.88 | 0.82 | -999 |
| 7 | 48.79 | -130.14 | 0.65 | 0.86 | 0.72 | -999 |
| 7 | 48.57 | -130.14 | 0.65 | 0.82 | 0.73 | -999 |
| 7 | 48.35 | -129.54 | 0.70 | 0.87 | 0.59 | -999 |
| 7 | 48.25 | -129.23 | 0.59 | 0.81 | 0.53 | -999 |
| 7 | 48.61 | -128.89 | 0.81 | 0.92 | 0.65 | -999 |
| 7 | 48.60 | -128.53 | 0.82 | 0.91 | 0.54 | -999 |
| 7 | 48.57 | -127.83 | 2.49 | 1.35 | 0.67 | -999 |
| 7 | 48.55 | -127.49 | 2.56 | 1.29 | 0.71 | -999 |
| 7 | 48.54 | -126.80 | 1.82 | 1.17 | 0.65 | -999 |
| 7 | 48.55 | -126.45 | 1.36 | 1.10 | 0.66 | -999 |
| 7 | 48.54 | -125.74 | 2.44 | 1.54 | 0.89 | -999 |
| 7 | 48.51 | -125.41 | 2.60 | 1.58 | 1.04 | -999 |

---

|   |       |        |       |      |      |      |
|---|-------|--------|-------|------|------|------|
| 8 | 10.95 | -55.35 | 0.85  | 0.72 | 2.41 | -999 |
| 8 | 10.54 | -53.70 | 0.84  | 0.60 | 3.00 | -999 |
| 8 | 10.00 | -51.34 | 0.83  | 0.62 | 3.09 | -999 |
| 8 | 10.00 | -47.49 | 0.78  | 0.77 | 2.15 | -999 |
| 8 | 10.00 | -44.81 | 0.72  | 0.74 | 2.05 | -999 |
| 8 | 10.00 | -38.54 | 2.84  | 0.86 | 3.05 | -999 |
| 8 | 10.01 | -36.03 | 4.00  | 0.90 | 2.32 | -999 |
| 8 | 10.00 | -32.91 | 3.67  | 0.79 | 3.82 | -999 |
| 8 | 10.00 | -30.20 | 7.56  | 1.15 | 3.87 | -999 |
| 8 | 6.63  | -26.44 | 4.58  | 0.75 | 2.03 | -999 |
| 8 | 3.14  | -26.21 | 3.80  | 0.84 | 1.85 | -999 |
| 8 | 0.00  | -26.00 | 6.00  | 0.89 | 2.41 | -999 |
| 8 | 0.06  | -23.47 | 4.32  | 0.90 | 2.48 | -999 |
| 8 | 5.73  | -24.11 | 4.48  | 1.00 | 2.54 | -999 |
| 8 | 8.73  | -24.67 | 9.80  | 0.88 | 1.94 | -999 |
| 8 | 10.59 | -24.72 | 6.43  | 1.35 | 4.58 | -999 |
| 8 | 11.00 | -21.41 | 6.42  | 1.56 | 4.10 | -999 |
| 8 | 11.61 | -18.44 | 6.78  | 1.35 | 3.14 | -999 |
| 8 | 10.53 | -16.99 | 4.21  | 1.04 | 3.70 | -999 |
| 8 | 9.31  | -19.00 | 37.23 | 2.61 | 4.41 | -999 |
| 8 | 7.00  | -17.08 | 3.22  | 0.88 | 2.22 | -999 |
| 8 | 3.59  | -1.61  | 2.90  | 0.74 | 2.66 | -999 |
| 9 | 22.81 | -20.49 | -999  | -999 | -999 | 8.00 |
| 9 | 22.65 | -20.61 | -999  | -999 | -999 | 8.00 |
| 9 | 22.46 | -20.76 | -999  | 0.21 | -999 | 8.00 |
| 9 | 22.28 | -20.91 | 0.21  | 0.20 | -999 | 8.00 |
| 9 | 22.10 | -21.05 | 0.21  | 0.21 | -999 | 8.00 |
| 9 | 21.91 | -21.19 | 0.22  | 0.19 | -999 | 8.00 |
| 9 | 21.73 | -21.33 | 0.21  | 0.23 | -999 | 8.00 |
| 9 | 21.56 | -21.47 | 0.23  | 0.16 | -999 | 8.00 |
| 9 | 21.37 | -21.61 | 0.25  | 0.25 | -999 | 8.00 |
| 9 | 21.20 | -21.75 | 0.29  | 0.26 | -999 | 8.00 |
| 9 | 21.03 | -21.88 | 0.27  | 0.36 | -999 | 8.00 |
| 9 | 20.84 | -22.03 | 0.23  | 0.09 | -999 | 8.00 |
| 9 | 20.61 | -22.21 | 0.30  | 0.24 | -999 | 8.00 |
| 9 | 20.43 | -22.34 | 0.30  | 0.29 | -999 | 8.00 |
| 9 | 20.26 | -22.47 | 0.31  | 0.19 | -999 | 8.00 |
| 9 | 20.08 | -22.61 | 0.32  | 0.25 | -999 | 8.00 |
| 9 | 19.87 | -22.76 | 0.35  | 0.29 | -999 | 8.00 |
| 9 | 19.70 | -22.90 | 0.33  | -999 | -999 | 8.00 |
| 9 | 18.17 | -24.07 | 0.36  | -999 | -999 | 8.00 |
| 9 | 17.12 | -23.09 | 0.27  | -999 | -999 | 8.00 |
| 9 | 17.14 | -22.87 | 0.27  | -999 | -999 | 8.00 |
| 9 | 17.15 | -22.65 | 0.28  | -999 | -999 | 8.00 |
| 9 | 17.17 | -22.44 | 0.29  | -999 | -999 | 8.00 |
| 9 | 17.18 | -22.22 | 0.33  | -999 | -999 | 8.00 |
| 9 | 17.20 | -21.98 | 0.38  | -999 | -999 | 8.00 |

|   |       |        |      |      |      |      |
|---|-------|--------|------|------|------|------|
| 9 | 17.21 | -21.77 | 0.33 | -999 | -999 | 8.00 |
| 9 | 17.23 | -21.57 | 0.36 | -999 | -999 | 8.00 |
| 9 | 17.24 | -21.37 | 0.34 | -999 | -999 | 8.00 |
| 9 | 17.26 | -21.16 | 0.37 | -999 | -999 | 8.00 |
| 9 | 17.27 | -20.96 | 0.36 | -999 | -999 | 8.00 |
| 9 | 17.28 | -20.79 | 0.40 | 0.27 | -999 | 8.00 |
| 9 | 17.29 | -20.58 | 0.57 | -999 | -999 | 8.00 |
| 9 | 17.29 | -20.35 | 0.55 | 0.22 | -999 | 8.00 |
| 9 | 17.27 | -20.14 | 0.49 | -999 | -999 | 8.00 |
| 9 | 17.24 | -19.93 | 0.58 | 0.30 | -999 | 8.00 |
| 9 | 17.17 | -19.35 | 0.73 | 0.38 | -999 | 8.00 |
| 9 | 17.19 | -19.48 | 0.67 | 0.28 | -999 | 8.00 |
| 9 | 17.22 | -19.71 | 0.71 | 0.31 | -999 | 8.00 |
| 9 | 17.24 | -19.94 | 0.59 | -999 | -999 | 8.00 |
| 9 | 17.27 | -20.16 | 0.56 | 0.27 | -999 | 8.00 |
| 9 | 17.29 | -20.28 | 0.53 | -999 | -999 | 8.00 |
| 9 | 17.25 | -20.02 | 0.56 | 0.35 | -999 | 8.00 |
| 9 | 17.23 | -19.81 | 0.59 | 0.31 | -999 | 8.00 |
| 9 | 17.20 | -19.61 | 0.58 | -999 | -999 | 8.00 |
| 9 | 17.18 | -19.41 | 0.58 | 0.25 | -999 | 8.00 |
| 9 | 17.15 | -19.21 | 0.64 | 0.34 | -999 | 8.00 |
| 9 | 17.13 | -19.00 | 0.67 | 0.29 | -999 | 8.00 |
| 9 | 17.12 | -18.79 | 0.77 | 0.37 | -999 | 8.00 |
| 9 | 17.13 | -18.24 | 1.05 | -999 | -999 | 8.00 |
| 9 | 17.13 | -18.05 | 1.15 | 0.37 | -999 | 8.00 |
| 9 | 17.13 | -17.86 | 1.16 | 0.38 | -999 | 8.00 |
| 9 | 17.14 | -17.66 | 1.31 | 0.39 | -999 | 8.00 |
| 9 | 17.14 | -17.47 | 1.40 | 0.50 | -999 | 8.00 |
| 9 | 17.20 | -17.57 | 1.19 | -999 | -999 | 8.00 |
| 9 | 17.26 | -17.75 | 1.21 | 0.41 | -999 | 8.00 |
| 9 | 17.33 | -17.93 | 1.16 | -999 | -999 | 8.00 |
| 9 | 17.39 | -18.11 | 1.10 | 0.37 | -999 | 8.00 |
| 9 | 17.46 | -18.28 | 1.14 | 0.40 | -999 | 8.00 |
| 9 | 17.55 | -18.53 | 0.96 | 0.31 | -999 | 8.00 |
| 9 | 17.61 | -18.36 | 1.15 | 0.30 | -999 | 8.00 |
| 9 | 17.66 | -18.17 | 1.34 | -999 | -999 | 8.00 |
| 9 | 17.71 | -17.98 | 1.62 | 0.52 | -999 | 8.00 |
| 9 | 17.76 | -17.78 | 1.65 | -999 | -999 | 8.00 |
| 9 | 17.81 | -17.58 | 1.82 | 0.44 | -999 | 8.00 |
| 9 | 17.86 | -17.76 | 1.65 | 0.26 | -999 | 8.00 |
| 9 | 17.89 | -17.98 | 1.62 | 0.46 | -999 | 8.00 |
| 9 | 17.92 | -18.19 | 1.67 | 0.46 | -999 | 8.00 |
| 9 | 17.82 | -18.36 | 1.38 | -999 | -999 | 8.00 |
| 9 | 17.11 | -19.06 | 1.15 | -999 | -999 | 8.00 |
| 9 | 16.75 | -19.41 | 1.01 | 0.32 | -999 | 8.00 |
| 9 | 16.63 | -19.58 | 1.06 | 0.35 | -999 | 8.00 |
| 9 | 16.61 | -19.79 | 0.95 | 0.36 | -999 | 8.00 |

|   |       |        |      |      |      |      |
|---|-------|--------|------|------|------|------|
| 9 | 16.59 | -20.01 | 0.93 | 0.29 | -999 | 8.00 |
| 9 | 16.57 | -20.22 | 0.90 | 0.28 | -999 | 8.00 |
| 9 | 16.55 | -20.43 | 0.93 | 0.28 | -999 | 8.00 |
| 9 | 16.52 | -20.76 | 1.02 | 0.35 | -999 | 8.00 |
| 9 | 16.50 | -20.97 | 0.97 | 0.44 | -999 | 8.00 |
| 9 | 16.50 | -20.99 | 0.89 | 0.38 | -999 | 8.00 |
| 9 | 16.50 | -20.94 | 0.88 | -999 | -999 | 8.00 |
| 9 | 16.35 | -20.01 | 0.62 | 0.36 | -999 | 8.00 |
| 9 | 16.31 | -19.79 | 0.88 | 0.21 | -999 | 8.00 |
| 9 | 16.33 | -19.58 | 1.24 | 0.43 | -999 | 8.00 |
| 9 | 16.35 | -19.37 | 1.33 | 0.45 | -999 | 8.00 |
| 9 | 16.37 | -19.15 | 1.19 | 0.54 | -999 | 8.00 |
| 9 | 16.39 | -18.94 | 1.16 | 0.53 | -999 | 8.00 |
| 9 | 16.41 | -18.72 | 1.12 | 0.48 | -999 | 8.00 |
| 9 | 16.43 | -18.50 | 1.19 | 0.58 | -999 | 8.00 |
| 9 | 16.46 | -18.29 | 1.37 | 0.56 | -999 | 8.00 |
| 9 | 16.47 | -18.07 | 1.46 | 0.58 | -999 | 8.00 |
| 9 | 16.50 | -17.86 | 1.86 | 0.58 | -999 | 8.00 |
| 9 | 16.52 | -17.64 | 2.00 | 0.65 | -999 | 8.00 |
| 9 | 16.54 | -17.36 | 2.60 | 0.56 | -999 | 8.00 |
| 9 | 16.56 | -17.15 | 2.66 | 0.71 | -999 | 8.00 |
| 9 | 16.58 | -16.94 | 2.53 | 0.72 | -999 | 8.00 |
| 9 | 16.62 | -16.74 | 2.92 | 0.91 | -999 | 8.00 |
| 9 | 16.80 | -16.65 | 2.56 | 0.65 | -999 | 8.00 |
| 9 | 16.97 | -16.54 | 2.84 | -999 | -999 | 8.00 |
| 9 | 17.23 | -16.95 | 2.28 | 0.59 | -999 | 8.00 |
| 9 | 17.25 | -17.18 | 1.99 | 0.57 | -999 | 8.00 |
| 9 | 17.31 | -17.39 | 1.71 | -999 | -999 | 8.00 |
| 9 | 17.37 | -17.58 | 1.58 | 0.51 | -999 | 8.00 |
| 9 | 17.43 | -17.77 | 1.69 | 0.80 | -999 | 8.00 |
| 9 | 17.54 | -17.17 | 2.56 | -999 | -999 | 8.00 |
| 9 | 17.55 | -16.97 | 2.84 | 0.00 | -999 | 8.00 |
| 9 | 17.57 | -16.79 | 2.52 | 0.67 | -999 | 8.00 |
| 9 | 17.59 | -16.62 | 2.03 | 0.54 | -999 | 8.00 |
| 9 | 17.65 | -16.48 | 1.69 | 0.80 | -999 | 8.00 |
| 9 | 17.81 | -16.43 | 1.50 | 0.46 | -999 | 8.00 |
| 9 | 17.96 | -16.39 | 0.87 | 0.55 | -999 | 8.00 |
| 9 | 18.09 | -16.40 | 1.13 | 0.53 | -999 | 8.00 |
| 9 | 18.12 | -16.61 | 0.74 | 0.55 | -999 | 8.00 |
| 9 | 18.12 | -16.83 | 1.76 | 0.51 | -999 | 8.00 |
| 9 | 18.12 | -17.42 | 1.86 | 0.45 | -999 | 8.00 |
| 9 | 18.12 | -17.64 | 1.41 | 0.39 | -999 | 8.00 |
| 9 | 18.12 | -17.85 | 0.92 | 0.37 | -999 | 8.00 |
| 9 | 18.12 | -18.07 | 1.15 | 0.39 | -999 | 8.00 |
| 9 | 18.12 | -18.28 | 0.76 | 0.49 | -999 | 8.00 |
| 9 | 18.18 | -18.14 | 0.78 | 0.39 | -999 | 8.00 |
| 9 | 18.19 | -17.95 | 1.13 | 0.46 | -999 | 8.00 |

|   |       |        |      |      |      |      |
|---|-------|--------|------|------|------|------|
| 9 | 18.26 | -17.76 | 1.38 | 0.47 | -999 | 8.00 |
| 9 | 18.33 | -17.57 | 1.23 | 0.55 | -999 | 8.00 |
| 9 | 18.40 | -17.38 | 1.78 | 0.53 | -999 | 8.00 |
| 9 | 18.47 | -17.18 | 1.44 | 0.41 | -999 | 8.00 |
| 9 | 18.54 | -16.98 | 2.35 | 0.58 | -999 | 8.00 |
| 9 | 18.61 | -16.78 | 1.35 | 0.61 | -999 | 8.00 |
| 9 | 18.73 | -16.70 | 1.76 | 0.00 | -999 | 8.00 |
| 9 | 18.88 | -16.67 | 1.13 | 0.45 | -999 | 8.00 |
| 9 | 19.04 | -16.63 | 1.33 | 0.51 | -999 | 8.00 |
| 9 | 19.20 | -16.75 | 1.76 | 0.49 | -999 | 8.00 |
| 9 | 19.35 | -16.90 | 1.81 | 0.52 | -999 | 8.00 |
| 9 | 19.51 | -17.04 | 1.08 | 0.47 | -999 | 8.00 |
| 9 | 19.65 | -17.19 | 1.64 | 0.52 | -999 | 8.00 |
| 9 | 19.82 | -17.32 | 1.53 | 0.52 | -999 | 8.00 |
| 9 | 19.97 | -17.46 | 1.44 | 0.44 | -999 | 8.00 |
| 9 | 20.41 | -17.82 | 1.44 | 0.60 | -999 | 8.00 |
| 9 | 20.58 | -17.95 | 1.19 | 0.39 | -999 | 8.00 |
| 9 | 20.73 | -18.09 | 1.01 | 0.32 | -999 | 8.00 |
| 9 | 20.87 | -18.23 | -999 | 0.37 | -999 | 8.00 |
| 9 | 21.02 | -18.37 | 0.68 | 0.32 | -999 | 8.00 |
| 9 | 21.17 | -18.51 | 0.75 | 0.33 | -999 | 8.00 |
| 9 | 21.34 | -18.51 | 0.64 | 0.27 | -999 | 8.00 |
| 9 | 21.45 | -18.34 | 0.57 | 0.29 | -999 | 8.00 |
| 9 | 21.56 | -18.18 | 0.59 | 0.27 | -999 | 8.00 |
| 9 | 21.68 | -18.03 | 0.61 | 0.24 | -999 | 8.00 |
| 9 | 21.80 | -17.88 | 0.68 | 0.21 | -999 | 8.00 |
| 9 | 21.91 | -17.74 | 0.69 | 0.23 | -999 | 8.00 |
| 9 | 22.03 | -17.59 | 0.69 | 0.24 | -999 | 8.00 |
| 9 | 22.14 | -17.44 | 0.75 | 0.00 | -999 | 8.00 |
| 9 | 22.25 | -17.28 | 0.77 | 0.29 | -999 | 8.00 |
| 9 | 22.31 | -17.11 | 0.90 | 0.35 | -999 | 8.00 |
| 9 | 22.50 | -17.19 | 0.75 | 0.28 | -999 | 8.00 |
| 9 | 22.68 | -17.28 | 0.76 | 0.25 | -999 | 8.00 |
| 9 | 22.86 | -17.37 | 0.64 | 0.26 | -999 | 8.00 |
| 9 | 23.04 | -17.46 | 0.66 | 0.30 | -999 | 8.00 |
| 9 | 23.21 | -17.55 | 0.61 | 0.24 | -999 | 8.00 |
| 9 | 23.38 | -17.64 | 0.60 | 0.00 | -999 | 8.00 |
| 9 | 23.56 | -17.72 | 0.56 | 0.24 | -999 | 8.00 |
| 9 | 24.08 | -17.99 | 0.61 | 0.27 | -999 | 8.00 |
| 9 | 24.24 | -18.07 | 0.59 | 0.27 | -999 | 8.00 |
| 9 | 24.40 | -18.07 | 0.61 | 0.26 | -999 | 8.00 |
| 9 | 24.53 | -17.93 | 0.55 | 0.25 | -999 | 8.00 |
| 9 | 24.66 | -17.80 | 0.58 | 0.30 | -999 | 8.00 |
| 9 | 24.78 | -17.66 | 0.53 | 0.23 | -999 | 8.00 |
| 9 | 24.90 | -17.53 | 0.53 | 0.26 | -999 | 8.00 |
| 9 | 25.02 | -17.39 | 0.56 | 0.26 | -999 | 8.00 |
| 9 | 25.13 | -17.26 | 0.59 | 0.27 | -999 | 8.00 |

|   |       |        |      |      |      |      |
|---|-------|--------|------|------|------|------|
| 9 | 25.25 | -17.13 | 0.62 | 0.26 | -999 | 8.00 |
| 9 | 25.40 | -17.10 | 0.46 | 0.22 | -999 | 8.00 |
| 9 | 25.56 | -17.15 | 0.64 | -999 | -999 | 8.00 |
| 9 | 25.73 | -17.20 | 0.67 | 0.26 | -999 | 8.00 |
| 9 | 26.27 | -17.36 | 0.68 | 0.24 | -999 | 8.00 |
| 9 | 26.45 | -17.42 | 0.65 | 0.24 | -999 | 8.00 |
| 9 | 26.62 | -17.47 | 0.52 | 0.20 | -999 | 8.00 |
| 9 | 26.79 | -17.52 | 0.50 | 0.21 | -999 | 8.00 |
| 9 | 26.96 | -17.57 | 0.47 | 0.21 | -999 | 8.00 |
| 9 | 27.09 | -17.47 | 0.49 | 0.21 | -999 | 8.00 |
| 9 | 27.20 | -17.32 | 0.00 | 0.22 | -999 | 8.00 |
| 9 | 27.31 | -17.16 | 0.42 | 0.00 | -999 | 8.00 |
| 9 | 27.43 | -17.00 | 0.56 | 0.24 | -999 | 8.00 |
| 9 | 27.55 | -16.85 | 0.68 | 0.21 | -999 | 8.00 |
| 9 | 27.68 | -16.67 | 0.69 | 0.19 | -999 | 8.00 |
| 9 | 27.81 | -16.49 | 0.92 | 0.21 | -999 | 8.00 |
| 9 | 27.94 | -16.32 | 0.97 | 0.21 | -999 | 8.00 |
| 9 | 28.06 | -16.20 | 0.69 | 0.24 | -999 | 8.00 |
| 9 | 28.16 | -16.10 | 0.64 | 0.20 | -999 | 8.00 |
| 9 | 28.27 | -15.99 | 0.38 | 0.17 | -999 | 8.00 |
| 9 | 28.39 | -15.88 | 0.36 | 0.19 | -999 | 8.00 |
| 9 | 28.52 | -15.76 | 0.32 | 0.19 | -999 | 8.00 |
| 9 | 28.98 | -15.56 | 0.38 | 0.16 | -999 | 8.00 |
| 9 | 29.14 | -15.51 | 0.31 | 0.20 | -999 | 8.00 |
| 9 | 29.29 | -15.46 | 0.30 | 0.19 | -999 | 8.00 |
| 9 | 29.43 | -15.41 | 0.34 | 0.20 | -999 | 8.00 |
| 9 | 29.58 | -15.36 | 0.37 | 0.25 | -999 | 8.00 |
| 9 | 29.73 | -15.31 | 0.40 | 0.24 | -999 | 8.00 |
| 9 | 29.89 | -15.26 | 0.43 | 0.24 | -999 | 8.00 |
| 9 | 30.04 | -15.21 | 0.49 | 0.24 | -999 | 8.00 |
| 9 | 30.20 | -15.16 | 0.50 | 0.26 | -999 | 8.00 |
| 9 | 30.36 | -15.10 | 0.54 | 0.29 | -999 | 8.00 |
| 9 | 30.53 | -15.05 | 0.54 | 0.27 | -999 | 8.00 |
| 9 | 30.71 | -14.99 | 0.58 | 0.28 | -999 | 8.00 |
| 9 | 30.88 | -14.93 | 0.53 | 0.27 | -999 | 8.00 |
| 9 | 31.06 | -14.87 | 0.58 | 0.29 | -999 | 8.00 |
| 9 | 31.24 | -14.81 | 0.51 | 0.26 | -999 | 8.00 |
| 9 | 31.43 | -14.75 | 0.42 | 0.00 | -999 | 8.00 |
| 9 | 31.61 | -14.69 | 0.38 | 0.24 | -999 | 8.00 |
| 9 | 31.79 | -14.63 | 0.43 | 0.26 | -999 | 8.00 |
| 9 | 32.02 | -14.55 | 0.37 | 0.37 | -999 | 8.00 |
| 9 | 32.46 | -14.40 | 0.49 | 0.26 | -999 | 8.00 |
| 9 | 32.64 | -14.34 | 0.37 | 0.28 | -999 | 8.00 |
| 9 | 32.82 | -14.28 | 0.40 | 0.33 | -999 | 8.00 |
| 9 | 33.00 | -14.22 | 0.42 | 0.36 | -999 | 8.00 |
| 9 | 33.18 | -14.14 | 0.41 | 0.28 | -999 | 8.00 |
| 9 | 33.36 | -14.08 | 0.40 | 0.32 | -999 | 8.00 |

|       |       |        |      |      |      |       |
|-------|-------|--------|------|------|------|-------|
| 9     | 33.54 | -14.03 | 0.40 | 0.29 | -999 | 8.00  |
| 9     | 33.73 | -13.97 | 0.43 | 0.33 | -999 | 8.00  |
| 9     | 33.91 | -13.91 | 0.36 | 0.30 | -999 | 8.00  |
| 9     | 34.09 | -13.84 | 0.34 | 0.29 | -999 | 8.00  |
| 9     | 34.27 | -13.79 | 0.34 | 0.24 | -999 | 8.00  |
| 9     | 34.46 | -13.72 | 0.34 | 0.28 | -999 | 8.00  |
| 9     | 34.66 | -13.65 | 0.31 | 0.24 | -999 | 8.00  |
| 9     | 34.86 | -13.58 | 0.27 | 0.21 | -999 | 8.00  |
| 9     | 35.06 | -13.51 | 0.30 | 0.26 | -999 | 8.00  |
| 9     | 35.27 | -13.44 | 0.29 | 0.22 | -999 | 8.00  |
| 9     | 35.48 | -13.36 | 0.27 | 0.22 | -999 | 8.00  |
| 9     | 35.68 | -13.29 | 0.27 | 0.20 | -999 | 8.00  |
| 9     | 35.89 | -13.22 | 0.21 | 0.17 | -999 | 8.00  |
| 9     | 36.52 | -12.99 | 0.34 | 0.37 | -999 | 8.00  |
| 9     | 36.73 | -12.92 | 0.25 | 0.23 | -999 | 8.00  |
| 9     | 36.94 | -12.85 | 0.24 | 0.24 | -999 | 8.00  |
| 9     | 37.15 | -12.77 | 0.22 | 0.22 | -999 | 8.00  |
| 9     | 37.37 | -12.69 | 0.24 | 0.23 | -999 | 8.00  |
| 9     | 37.59 | -12.61 | 0.24 | 0.23 | -999 | 8.00  |
| 9     | 37.81 | -12.53 | 0.21 | 0.25 | -999 | 8.00  |
| 9     | 38.03 | -12.45 | 0.21 | 0.23 | -999 | 8.00  |
| 9     | 38.25 | -12.37 | 0.23 | 0.24 | -999 | 8.00  |
| 9     | 38.46 | -12.29 | 0.24 | 0.22 | -999 | 8.00  |
| 9     | 38.68 | -12.21 | 0.20 | 0.22 | -999 | 8.00  |
| 9     | 38.90 | -12.13 | 0.19 | 0.20 | -999 | 8.00  |
| <hr/> |       |        |      |      |      |       |
| 10    | 54.52 | -10.97 | 0.35 | -999 | -999 | 20.00 |
| 10    | 54.59 | -11.16 | 0.21 | -999 | -999 | 20.00 |
| 10    | 54.61 | -11.24 | 0.18 | 0.66 | -999 | 20.00 |
| 10    | 54.65 | -11.38 | 0.44 | 0.69 | -999 | 20.00 |
| 10    | 54.68 | -11.54 | 0.53 | 0.77 | -999 | 20.00 |
| 10    | 54.62 | -11.69 | 0.50 | 0.79 | -999 | 20.00 |
| 10    | 54.56 | -11.83 | 0.64 | 1.11 | -999 | 20.00 |
| 10    | 54.48 | -11.94 | 0.48 | 0.87 | -999 | 20.00 |
| 10    | 54.43 | -12.10 | 0.46 | 0.76 | -999 | 20.00 |
| 10    | 54.38 | -12.24 | 0.47 | 0.71 | -999 | 20.00 |
| 10    | 54.24 | -11.81 | 0.10 | 0.66 | -999 | 20.00 |
| 10    | 54.37 | -10.75 | 0.28 | 0.49 | -999 | 20.00 |
| 10    | 54.29 | -10.88 | 0.28 | 0.55 | -999 | 20.00 |
| 10    | 54.23 | -10.98 | 0.20 | 0.63 | -999 | 20.00 |
| 10    | 54.16 | -11.09 | 0.20 | 0.72 | -999 | 20.00 |
| 10    | 54.09 | -11.23 | 0.21 | 0.74 | -999 | 20.00 |
| 10    | 54.06 | -11.11 | 0.01 | 0.05 | -999 | 20.00 |
| 10    | 54.01 | -10.94 | 0.22 | 0.71 | -999 | 20.00 |
| 10    | 53.98 | -11.01 | 0.17 | 0.35 | -999 | 20.00 |
| 10    | 53.91 | -11.13 | 0.28 | 0.72 | -999 | 20.00 |
| 10    | 53.83 | -11.26 | 0.08 | 0.23 | -999 | 20.00 |



|    |       |        |      |      |      |       |
|----|-------|--------|------|------|------|-------|
| 10 | 53.75 | -11.40 | 0.29 | 0.86 | -999 | 20.00 |
| 10 | 53.69 | -11.52 | 0.27 | 0.54 | -999 | 20.00 |
| 10 | 53.65 | -11.62 | 0.05 | 0.19 | -999 | 20.00 |
| 10 | 53.59 | -11.74 | 0.05 | 0.17 | -999 | 20.00 |
| 10 | 53.80 | -11.60 | 0.33 | -999 | -999 | 20.00 |
| 10 | 54.07 | -11.40 | 0.15 | -999 | -999 | 20.00 |
| 10 | 54.33 | -11.20 | 0.24 | -999 | -999 | 20.00 |
| 10 | 54.59 | -11.00 | 0.04 | -999 | -999 | 20.00 |
| 10 | 54.92 | -10.73 | 0.14 | -999 | -999 | 20.00 |
| 10 | 55.17 | -10.51 | -999 | 0.50 | -999 | 20.00 |
| 10 | 55.43 | -10.32 | 0.09 | -999 | -999 | 20.00 |
| 10 | 57.03 | -9.03  | 0.12 | 0.15 | -999 | 20.00 |
| 10 | 57.13 | -9.25  | 0.26 | -999 | -999 | 20.00 |
| 10 | 57.13 | -9.62  | 0.21 | -999 | -999 | 20.00 |
| 10 | 57.15 | -10.30 | 0.06 | -999 | -999 | 20.00 |
| 10 | 57.18 | -11.37 | 0.04 | -999 | -999 | 20.00 |
| 10 | 57.17 | -11.93 | 0.21 | -999 | -999 | 20.00 |
| 10 | 57.18 | -12.62 | 0.40 | -999 | -999 | 20.00 |
| 10 | 57.18 | -13.32 | 0.14 | -999 | -999 | 20.00 |
| 10 | 57.12 | -13.14 | 0.59 | -999 | -999 | 20.00 |
| 10 | 56.99 | -12.65 | 0.24 | 0.61 | -999 | 20.00 |
| 10 | 56.89 | -12.24 | 0.27 | -999 | -999 | 20.00 |
| 10 | 56.60 | -11.17 | 0.53 | -999 | -999 | 20.00 |
| 10 | 56.53 | -10.88 | 0.48 | -999 | -999 | 20.00 |
| 10 | 56.39 | -10.40 | 0.49 | 0.93 | -999 | 20.00 |
| 10 | 56.29 | -9.99  | 0.14 | -999 | -999 | 20.00 |
| 10 | 56.17 | -9.57  | 0.42 | -999 | -999 | 20.00 |
| 10 | 56.16 | -9.83  | 0.24 | -999 | -999 | 20.00 |
| 10 | 56.16 | -10.09 | 0.15 | -999 | -999 | 20.00 |
| 10 | 56.16 | -10.41 | 0.29 | -999 | -999 | 20.00 |
| 10 | 56.13 | -10.67 | 0.10 | -999 | -999 | 20.00 |
| 10 | 55.99 | -11.13 | 0.14 | -999 | -999 | 20.00 |
| 10 | 55.70 | -11.43 | 0.13 | -999 | -999 | 20.00 |
| 10 | 55.46 | -11.18 | 0.07 | 0.28 | -999 | 20.00 |
| 10 | 55.23 | -10.87 | 0.34 | 0.79 | -999 | 20.00 |
| 10 | 54.96 | -10.75 | 0.89 | -999 | -999 | 20.00 |
| 10 | 54.68 | -10.53 | 0.77 | -999 | -999 | 20.00 |
| 10 | 54.75 | -10.83 | 1.12 | 0.89 | -999 | 20.00 |
| 10 | 54.88 | -11.27 | 1.33 | 0.87 | -999 | 20.00 |
| 10 | 55.02 | -11.68 | 0.62 | -999 | -999 | 20.00 |
| 10 | 55.31 | -11.56 | 0.74 | 0.96 | -999 | 20.00 |
| 10 | 55.52 | -11.14 | 0.32 | 1.22 | -999 | 20.00 |
| 10 | 55.70 | -10.77 | 1.06 | 0.00 | -999 | 20.00 |
| 10 | 55.89 | -10.38 | 0.46 | 0.53 | -999 | 20.00 |
| 10 | 56.06 | -10.04 | 0.18 | 0.55 | -999 | 20.00 |

|    |       |        |      |      |      |       |
|----|-------|--------|------|------|------|-------|
| 10 | 56.17 | -10.05 | 0.07 | 0.41 | -999 | 20.00 |
| 10 | 56.28 | -10.09 | 0.08 | 0.56 | -999 | 20.00 |
| 10 | 56.37 | -10.14 | 0.09 | -999 | -999 | 20.00 |
| 10 | 56.46 | -10.23 | 0.09 | 0.75 | -999 | 20.00 |
| 10 | 56.54 | -10.43 | 0.14 | 0.73 | -999 | 20.00 |
| 10 | 56.56 | -10.61 | 0.09 | 0.51 | -999 | 20.00 |
| 10 | 56.56 | -10.79 | 0.09 | 0.33 | -999 | 20.00 |
| 10 | 56.54 | -10.95 | 0.17 | 0.41 | -999 | 20.00 |
| 10 | 56.82 | -10.23 | 0.08 | 0.55 | -999 | 20.00 |
| 10 | 57.00 | -9.75  | 0.00 | 0.15 | -999 | 20.00 |
| 10 | 57.13 | -9.35  | 0.05 | 0.33 | -999 | 20.00 |
| 10 | 57.05 | -9.40  | 0.13 | 0.30 | -999 | 20.00 |
| 10 | 56.98 | -9.47  | 0.06 | 0.44 | -999 | 20.00 |
| 10 | 56.91 | -9.53  | 0.03 | 0.28 | -999 | 20.00 |
| 10 | 56.86 | -9.60  | 0.07 | 0.33 | -999 | 20.00 |
| 10 | 56.82 | -9.63  | 0.16 | 0.93 | -999 | 20.00 |
| 10 | 56.74 | -9.60  | 0.15 | -999 | -999 | 20.00 |
| 10 | 56.63 | -9.67  | 0.09 | -999 | -999 | 20.00 |
| 10 | 56.45 | -9.90  | 0.05 | -999 | -999 | 20.00 |
| 10 | 56.45 | -10.02 | -999 | 0.50 | -999 | 20.00 |
| 10 | 56.45 | -10.10 | -999 | 0.63 | -999 | 20.00 |
| 10 | 56.44 | -10.18 | 0.07 | -999 | -999 | 20.00 |
| 10 | 56.40 | -10.41 | 0.06 | -999 | -999 | 20.00 |
| 10 | 56.54 | -11.26 | 0.47 | -999 | -999 | 20.00 |
| 10 | 56.57 | -11.36 | 0.08 | 0.62 | -999 | 20.00 |
| 10 | 56.61 | -11.41 | 0.26 | 0.79 | -999 | 20.00 |
| 10 | 56.67 | -11.46 | 0.29 | -999 | -999 | 20.00 |
| 10 | 56.73 | -11.57 | 0.26 | 0.55 | -999 | 20.00 |
| 10 | 56.76 | -11.64 | 0.45 | 0.41 | -999 | 20.00 |
| 10 | 56.80 | -11.73 | 0.13 | 0.19 | -999 | 20.00 |
| 10 | 56.85 | -11.76 | 0.30 | 0.65 | -999 | 20.00 |
| 10 | 56.97 | -11.96 | 0.63 | 0.51 | -999 | 20.00 |
| 10 | 56.74 | -11.64 | 0.22 | 0.51 | -999 | 20.00 |
| 10 | 56.40 | -11.20 | 0.39 | 0.72 | -999 | 20.00 |
| 10 | 56.18 | -10.90 | 0.39 | 0.50 | -999 | 20.00 |
| 10 | 55.84 | -10.45 | 0.22 | 0.74 | -999 | 20.00 |
| 10 | 55.60 | -10.15 | 0.19 | 0.46 | -999 | 20.00 |
| 10 | 55.37 | -9.83  | 0.15 | 0.39 | -999 | 20.00 |
| 10 | 55.15 | -9.57  | 0.41 | 0.52 | -999 | 20.00 |
| 10 | 54.84 | -9.17  | 0.28 | 0.96 | -999 | 20.00 |
| 10 | 54.62 | -8.89  | 0.25 | 0.66 | -999 | 20.00 |
| 10 | 54.59 | -8.61  | 0.28 | 0.63 | -999 | 20.00 |
| 10 | 54.63 | -8.44  | 0.17 | 0.41 | -999 | 20.00 |
| 10 | 54.63 | -8.44  | 0.36 | 0.31 | -999 | 20.00 |
| 10 | 54.58 | -8.53  | 0.81 | 0.41 | -999 | 20.00 |

|    |       |        |      |      |      |       |
|----|-------|--------|------|------|------|-------|
| 10 | 54.62 | -8.87  | 1.15 | 0.62 | -999 | 20.00 |
| 10 | 54.72 | -9.02  | 1.68 | 0.92 | -999 | 20.00 |
| 10 | 54.84 | -9.16  | 0.89 | 0.64 | -999 | 20.00 |
| 10 | 54.95 | -9.31  | 1.11 | 0.65 | -999 | 20.00 |
| 10 | 55.06 | -9.44  | 0.71 | 0.62 | -999 | 20.00 |
| 10 | 55.16 | -9.59  | 1.04 | 0.67 | -999 | 20.00 |
| 10 | 55.28 | -9.75  | 0.33 | 0.49 | -999 | 20.00 |
| 10 | 55.41 | -9.88  | 0.41 | 0.63 | -999 | 20.00 |
| 10 | 55.52 | -10.03 | 0.43 | 0.82 | -999 | 20.00 |
| 10 | 55.54 | -10.19 | 0.49 | 0.67 | -999 | 20.00 |
| 10 | 55.64 | -10.43 | 0.31 | 0.62 | -999 | 20.00 |
| 10 | 55.77 | -10.59 | 0.48 | 0.91 | -999 | 20.00 |
| 10 | 55.89 | -10.76 | 0.60 | 0.78 | -999 | 20.00 |
| 10 | 56.12 | -10.88 | 0.20 | 0.41 | -999 | 20.00 |
| 10 | 56.25 | -10.83 | 0.29 | 0.56 | -999 | 20.00 |
| 10 | 56.38 | -10.81 | 0.41 | 0.50 | -999 | 20.00 |
| 10 | 56.51 | -10.78 | 0.33 | 0.62 | -999 | 20.00 |
| 10 | 56.64 | -10.56 | 0.13 | 0.30 | -999 | 20.00 |
| 10 | 56.70 | -10.36 | 0.25 | 0.61 | -999 | 20.00 |
| 10 | 56.80 | -10.25 | 0.22 | 0.47 | -999 | 20.00 |
| 10 | 56.92 | -10.28 | 0.19 | 0.50 | -999 | 20.00 |
| 10 | 56.85 | -11.67 | 0.10 | -999 | -999 | 20.00 |
| 10 | 56.72 | -11.88 | 0.11 | 0.33 | -999 | 20.00 |
| 10 | 56.65 | -11.93 | 0.20 | 0.36 | -999 | 20.00 |
| 10 | 56.57 | -12.01 | 0.21 | 0.38 | -999 | 20.00 |
| 10 | 56.52 | -12.12 | 0.19 | 0.41 | -999 | 20.00 |
| 10 | 56.47 | -12.24 | 0.19 | 0.56 | -999 | 20.00 |
| 10 | 56.39 | -12.29 | 0.35 | 0.68 | -999 | 20.00 |
| 10 | 56.28 | -12.30 | 0.31 | 0.40 | -999 | 20.00 |
| 10 | 56.21 | -12.32 | 0.27 | 0.37 | -999 | 20.00 |
| 10 | 56.14 | -12.33 | 0.53 | 0.57 | -999 | 20.00 |
| 10 | 56.06 | -12.31 | 0.65 | 0.56 | -999 | 20.00 |
| 10 | 55.94 | -12.32 | 0.70 | 0.72 | -999 | 20.00 |
| 10 | 55.88 | -12.33 | 0.65 | 0.76 | -999 | 20.00 |
| 10 | 55.83 | -12.32 | 0.96 | 0.56 | -999 | 20.00 |
| 10 | 55.77 | -12.32 | 0.94 | 0.40 | -999 | 20.00 |
| 10 | 55.70 | -12.30 | 0.62 | 0.53 | -999 | 20.00 |
| 10 | 55.64 | -12.33 | 0.46 | 0.55 | -999 | 20.00 |
| 10 | 55.60 | -12.40 | 0.52 | 0.56 | -999 | 20.00 |
| 10 | 55.56 | -12.46 | 0.53 | 0.69 | -999 | 20.00 |
| 10 | 55.54 | -12.52 | 0.70 | 0.44 | -999 | 20.00 |
| 10 | 55.68 | -11.95 | 0.52 | 0.67 | -999 | 20.00 |
| 10 | 55.79 | -11.46 | 0.50 | 0.53 | -999 | 20.00 |
| 10 | 55.92 | -10.96 | 0.49 | 0.69 | -999 | 20.00 |
| 10 | 56.05 | -10.40 | 0.50 | 0.64 | -999 | 20.00 |

|    |       |       |      |      |      |       |
|----|-------|-------|------|------|------|-------|
| 10 | 56.15 | -9.92 | 0.51 | 0.55 | -999 | 20.00 |
| 10 | 56.26 | -9.42 | 0.44 | 0.48 | -999 | 20.00 |
| 10 | 56.37 | -8.92 | 0.57 | 0.62 | -999 | 20.00 |
| 10 | 56.34 | -8.76 | 1.16 | 0.72 | -999 | 20.00 |
| 10 | 56.25 | -8.77 | 0.90 | 0.71 | -999 | 20.00 |
| 10 | 56.19 | -8.78 | 0.79 | 0.54 | -999 | 20.00 |
| 10 | 56.10 | -8.77 | 0.45 | 0.53 | -999 | 20.00 |
| 10 | 56.05 | -8.86 | 0.82 | 0.65 | -999 | 20.00 |
| 10 | 55.99 | -9.00 | 0.48 | 0.65 | -999 | 20.00 |
| 10 | 55.92 | -9.10 | 0.47 | 0.64 | -999 | 20.00 |
| 10 | 55.84 | -9.20 | 0.46 | 0.56 | -999 | 20.00 |
| 10 | 55.97 | -9.10 | 0.82 | 0.81 | -999 | 20.00 |
| 10 | 56.25 | -8.81 | 0.61 | 0.55 | -999 | 20.00 |
| 10 | 56.49 | -8.54 | 0.62 | 0.58 | -999 | 20.00 |
| 10 | 56.76 | -8.30 | 0.82 | 0.61 | -999 | 20.00 |
| 10 | 56.91 | -8.31 | 1.06 | 0.72 | -999 | 20.00 |
| 10 | 56.85 | -8.32 | 1.46 | 0.77 | -999 | 20.00 |
| 10 | 56.78 | -8.32 | 1.48 | 0.83 | -999 | 20.00 |
| 10 | 56.70 | -8.32 | 1.27 | 0.72 | -999 | 20.00 |
| 10 | 56.60 | -8.39 | 1.12 | 0.84 | -999 | 20.00 |
| 10 | 56.54 | -8.48 | 0.61 | 0.61 | -999 | 20.00 |
| 10 | 56.48 | -8.59 | 0.67 | 0.73 | -999 | 20.00 |
| 10 | 56.42 | -8.67 | 0.71 | 0.67 | -999 | 20.00 |
| 10 | 56.50 | -8.44 | 0.98 | 0.77 | -999 | 20.00 |
| 10 | 56.72 | -7.98 | 1.00 | 0.73 | -999 | 20.00 |
| 10 | 56.99 | -7.80 | 1.90 | 1.02 | -999 | 20.00 |
| 10 | 57.27 | -7.64 | 5.57 | 1.58 | -999 | 20.00 |
| 10 | 57.28 | -7.54 | 7.54 | 2.09 | -999 | 20.00 |
| 10 | 57.19 | -7.55 | 6.25 | 1.75 | -999 | 20.00 |
| 10 | 57.12 | -7.55 | 4.77 | 1.52 | -999 | 20.00 |
| 10 | 57.05 | -7.59 | 3.01 | 1.21 | -999 | 20.00 |
| 10 | 56.99 | -7.70 | 3.12 | 1.26 | -999 | 20.00 |
| 10 | 56.84 | -7.88 | 2.11 | 1.11 | -999 | 20.00 |
| 10 | 56.75 | -8.02 | 1.16 | 0.68 | -999 | 20.00 |
| 10 | 56.72 | -8.34 | 0.70 | 0.55 | -999 | 20.00 |
| 10 | 56.64 | -8.41 | 0.67 | 0.63 | -999 | 20.00 |
| 10 | 56.56 | -8.49 | 0.42 | 0.53 | -999 | 20.00 |
| 10 | 56.51 | -8.65 | 0.36 | 0.50 | -999 | 20.00 |
| 10 | 56.50 | -8.84 | 0.41 | 0.53 | -999 | 20.00 |
| 10 | 56.54 | -9.11 | 0.93 | 0.31 | -999 | 20.00 |
| 10 | 56.62 | -9.24 | 1.01 | 0.57 | -999 | 20.00 |
| 10 | 56.74 | -9.21 | 0.93 | 0.36 | -999 | 20.00 |
| 10 | 56.85 | -9.08 | 1.06 | 0.41 | -999 | 20.00 |
| 10 | 56.93 | -8.81 | 0.46 | 0.63 | -999 | 20.00 |
| 10 | 56.87 | -8.57 | 0.45 | 0.66 | -999 | 20.00 |

|       |       |        |      |      |      |       |
|-------|-------|--------|------|------|------|-------|
| 10    | 56.63 | -8.28  | 0.37 | 0.52 | -999 | 20.00 |
| 10    | 56.49 | -8.11  | 0.41 | 0.49 | -999 | 20.00 |
| 10    | 56.55 | -8.19  | 0.57 | 0.66 | -999 | 20.00 |
| 10    | 56.61 | -8.31  | 0.38 | 0.47 | -999 | 20.00 |
| 10    | 56.66 | -8.42  | 0.55 | 0.69 | -999 | 20.00 |
| 10    | 56.71 | -8.50  | 0.49 | 0.67 | -999 | 20.00 |
| 10    | 56.77 | -8.60  | 0.76 | 0.98 | -999 | 20.00 |
| 10    | 56.84 | -8.69  | 0.57 | 0.65 | -999 | 20.00 |
| 10    | 56.87 | -8.72  | 0.62 | 0.76 | -999 | 20.00 |
| 10    | 56.91 | -8.80  | 0.57 | 0.73 | -999 | 20.00 |
| 10    | 56.87 | -8.37  | 0.55 | 0.70 | -999 | 20.00 |
| 10    | 56.93 | -8.45  | 0.48 | 0.58 | -999 | 20.00 |
| 10    | 56.99 | -8.53  | 0.49 | 0.63 | -999 | 20.00 |
| 10    | 57.05 | -8.63  | 0.47 | 0.59 | -999 | 20.00 |
| 10    | 57.00 | -8.91  | 0.49 | 0.72 | -999 | 20.00 |
| 10    | 56.83 | -9.41  | 0.34 | 0.49 | -999 | 20.00 |
| 10    | 56.66 | -9.86  | 0.33 | 0.52 | -999 | 20.00 |
| 10    | 56.49 | -10.32 | 0.33 | 0.55 | -999 | 20.00 |
| 10    | 56.07 | -11.47 | 0.43 | 0.68 | -999 | 20.00 |
| 10    | 55.88 | -11.97 | 0.31 | 0.51 | -999 | 20.00 |
| 10    | 55.72 | -12.41 | 0.26 | 0.49 | -999 | 20.00 |
| 10    | 55.57 | -12.83 | 0.26 | 0.45 | -999 | 20.00 |
| 10    | 55.46 | -12.93 | 0.31 | 0.69 | -999 | 20.00 |
| 10    | 55.34 | -12.73 | 0.27 | 0.52 | -999 | 20.00 |
| 10    | 55.23 | -12.55 | 0.30 | 0.60 | -999 | 20.00 |
| 10    | 55.13 | -12.38 | 0.31 | 0.50 | -999 | 20.00 |
| 10    | 54.99 | -12.19 | 0.39 | 0.71 | -999 | 20.00 |
| 10    | 54.87 | -12.05 | 0.32 | 0.53 | -999 | 20.00 |
| 10    | 54.75 | -11.92 | 0.40 | 0.63 | -999 | 20.00 |
| 10    | 54.51 | -11.65 | 0.33 | 0.51 | -999 | 20.00 |
| 10    | 54.34 | -11.48 | 0.49 | 0.66 | -999 | 20.00 |
| 10    | 54.21 | -11.34 | 0.37 | 0.54 | -999 | 20.00 |
| 10    | 54.09 | -11.21 | 0.34 | 0.46 | -999 | 20.00 |
| 10    | 53.96 | -11.07 | 0.33 | 0.50 | -999 | 20.00 |
| 10    | 53.23 | -9.91  | 1.10 | 0.75 | -999 | 20.00 |
| <hr/> |       |        |      |      |      |       |
| 11    | 1.34  | 104.87 | 1.98 | 1.94 | 0.04 | -999  |
| 11    | 1.23  | 105.00 | 2.79 | 2.04 | 0.45 | -999  |
| 11    | 1.16  | 105.10 | 2.02 | 1.80 | 0.10 | -999  |
| 11    | 0.88  | 105.43 | 1.81 | 1.69 | 0.12 | -999  |
| 11    | 0.79  | 105.54 | 1.91 | 1.62 | 0.72 | -999  |
| 11    | 0.70  | 105.65 | 1.86 | 1.58 | 1.02 | -999  |
| 11    | 0.40  | 106.01 | 1.76 | 1.60 | 0.10 | -999  |
| 11    | 0.30  | 106.13 | 1.81 | 1.56 | 0.60 | -999  |
| 11    | 0.19  | 106.25 | 1.80 | 1.49 | 0.19 | -999  |
| 11    | -0.12 | 106.60 | 1.93 | 1.60 | 0.28 | -999  |

|    |       |        |      |      |      |      |
|----|-------|--------|------|------|------|------|
| 11 | -0.32 | 106.85 | 1.83 | 1.52 | 1.51 | -999 |
| 11 | -0.74 | 107.32 | 1.89 | 1.51 | 0.52 | -999 |
| 11 | -0.96 | 107.54 | 1.82 | 1.44 | 0.05 | -999 |
| 11 | -1.24 | 107.95 | 1.83 | 1.52 | 0.51 | -999 |
| 11 | -1.33 | 108.02 | -999 | 1.44 | 0.14 | -999 |
| 11 | -1.42 | 108.12 | 1.80 | 1.45 | 0.22 | -999 |
| 11 | -1.75 | 108.49 | 1.68 | 1.50 | 0.12 | -999 |
| 11 | -1.85 | 108.61 | 1.63 | 1.33 | -999 | -999 |
| 11 | -1.96 | 108.73 | 1.70 | 1.32 | 0.26 | -999 |
| 11 | -2.27 | 109.08 | 1.83 | 1.46 | 0.68 | -999 |
| 11 | -2.38 | 109.20 | 1.81 | 1.40 | 0.90 | -999 |
| 11 | -2.48 | 109.31 | 1.49 | 1.33 | 0.61 | -999 |
| 11 | -2.85 | 109.53 | 1.68 | 1.32 | 1.58 | -999 |
| 11 | -2.98 | 109.59 | 1.67 | 1.29 | 1.61 | -999 |
| 11 | -3.10 | 109.64 | 1.92 | 1.24 | -999 | -999 |
| 11 | -3.59 | 109.89 | 1.57 | 1.37 | 3.70 | -999 |
| 11 | -3.72 | 110.12 | 1.69 | 1.25 | 2.92 | -999 |
| 11 | -3.94 | 110.51 | 1.42 | 1.18 | 3.44 | -999 |
| 11 | -4.01 | 110.63 | 1.47 | 1.09 | 4.21 | -999 |
| 11 | -4.09 | 110.77 | 1.38 | 1.04 | 2.58 | -999 |
| 11 | -4.33 | 111.17 | 1.68 | 1.00 | 2.95 | -999 |
| 11 | -4.49 | 111.43 | 1.61 | 1.00 | 3.53 | -999 |
| 11 | -4.72 | 111.82 | 1.35 | 0.97 | 3.65 | -999 |
| 11 | -4.80 | 111.95 | 1.19 | 0.94 | 4.31 | -999 |
| 11 | -4.88 | 112.08 | 1.21 | 0.93 | 5.22 | -999 |
| 11 | -5.07 | 112.37 | 0.87 | 0.96 | 3.59 | -999 |
| 11 | -5.16 | 112.49 | -999 | 0.92 | 1.72 | -999 |
| 11 | -5.24 | 112.60 | 1.13 | 0.87 | 2.86 | -999 |
| 11 | -5.57 | 113.08 | 0.74 | 0.87 | 4.45 | -999 |
| 11 | -5.65 | 113.21 | 0.74 | 0.87 | 4.50 | -999 |
| 11 | -5.74 | 113.34 | 0.80 | 0.86 | 4.00 | -999 |
| 11 | -5.96 | 113.71 | -999 | 0.89 | 3.03 | -999 |
| 11 | -6.05 | 113.83 | 0.66 | 0.82 | 3.31 | -999 |
| 11 | -6.44 | 114.35 | 1.41 | 1.21 | 1.84 | -999 |
| 11 | -6.54 | 114.49 | 1.56 | 1.21 | 0.66 | -999 |
| 11 | -6.62 | 114.62 | 1.68 | 1.26 | 0.89 | -999 |
| 11 | -6.89 | 114.99 | 2.23 | 1.43 | 1.02 | -999 |
| 11 | -6.98 | 115.11 | 2.25 | 1.40 | 0.44 | -999 |
| 11 | -7.05 | 115.24 | 2.12 | 1.33 | 1.13 | -999 |
| 11 | -7.28 | 115.67 | 2.25 | 1.48 | 1.35 | -999 |
| 11 | -7.33 | 115.79 | 2.05 | 1.41 | 0.18 | -999 |
| 11 | -7.40 | 115.94 | 1.32 | 1.20 | 0.78 | -999 |
| 11 | -7.70 | 116.49 | 1.64 | 1.29 | -999 | -999 |
| 11 | -7.77 | 116.63 | 1.99 | 1.40 | 1.35 | -999 |
| 11 | -7.84 | 116.76 | 1.74 | 1.35 | 2.57 | -999 |
| 11 | -7.97 | 117.24 | 1.40 | 1.23 | 3.60 | -999 |
| 11 | -7.97 | 117.40 | 1.98 | 1.27 | 3.22 | -999 |

|    |       |        |      |      |      |      |
|----|-------|--------|------|------|------|------|
| 11 | -7.97 | 117.55 | 1.97 | 1.38 | 3.48 | -999 |
| 11 | -7.99 | 118.03 | 1.37 | 1.22 | 3.92 | -999 |
| 11 | -7.99 | 118.20 | 1.44 | 1.18 | 3.91 | -999 |
| 11 | -7.99 | 118.37 | 1.50 | 1.22 | 2.58 | -999 |
| 11 | -7.99 | 118.73 | 1.38 | 1.17 | -999 | -999 |
| 11 | -8.00 | 119.05 | 1.53 | 1.15 | 1.63 | -999 |
| 11 | -8.00 | 119.56 | 2.09 | 1.32 | 0.92 | -999 |
| 11 | -8.00 | 119.73 | 2.05 | 1.29 | 1.27 | -999 |
| 11 | -7.99 | 119.90 | 1.95 | 1.27 | 0.71 | -999 |
| 11 | -7.99 | 120.56 | 1.81 | 1.23 | 0.92 | -999 |
| 11 | -7.99 | 120.72 | 1.54 | 1.18 | 2.06 | -999 |
| 11 | -7.98 | 120.90 | 1.72 | 1.19 | 1.25 | -999 |
| 11 | -8.00 | 121.39 | 1.61 | 1.26 | 1.69 | -999 |
| 11 | -8.00 | 121.56 | 1.58 | 1.18 | 1.20 | -999 |
| 11 | -8.01 | 121.73 | 1.64 | 1.22 | 1.30 | -999 |
| 11 | -8.00 | 122.36 | 1.18 | 1.17 | 2.37 | -999 |
| 11 | -8.00 | 122.53 | 1.11 | 1.08 | 2.36 | -999 |
| 11 | -8.00 | 122.98 | 1.56 | 1.16 | 0.61 | -999 |
| 11 | -8.00 | 123.12 | 1.76 | 1.17 | 1.99 | -999 |
| 11 | -8.01 | 123.23 | 1.72 | 1.13 | 2.32 | -999 |
| 11 | -8.00 | 123.62 | 1.79 | 1.21 | -999 | -999 |
| 11 | -7.99 | 123.78 | 1.69 | 1.11 | -999 | -999 |
| 11 | -8.00 | 123.95 | 1.60 | 1.12 | -999 | -999 |
| 11 | -7.96 | 124.61 | 1.65 | 1.31 | -999 | -999 |
| 11 | -7.99 | 124.79 | 1.53 | 1.25 | -999 | -999 |
| 11 | -8.01 | 124.95 | 1.54 | 1.21 | -999 | -999 |
| 11 | -8.07 | 125.38 | 1.46 | 1.16 | -999 | -999 |
| 11 | -8.08 | 125.54 | 1.40 | 1.11 | -999 | -999 |
| 11 | -8.10 | 125.69 | 1.38 | 1.08 | 1.16 | -999 |
| 11 | -8.15 | 126.12 | 1.22 | 1.05 | 1.93 | -999 |
| 11 | -8.16 | 126.26 | 1.23 | 1.03 | 2.71 | -999 |
| 11 | -8.16 | 126.41 | 1.09 | 1.02 | 2.45 | -999 |
| 11 | -8.20 | 126.88 | 1.38 | 1.07 | 2.93 | -999 |
| 11 | -8.22 | 127.03 | 1.38 | 1.05 | 2.02 | -999 |
| 11 | -8.24 | 127.18 | 1.32 | 1.01 | 1.19 | -999 |
| 11 | -8.29 | 127.49 | 1.41 | 1.01 | -999 | -999 |
| 11 | -8.33 | 127.69 | 1.43 | 0.96 | -999 | -999 |
| 11 | -9.07 | 132.69 | 1.64 | 1.45 | 7.28 | -999 |
| 11 | -9.10 | 132.84 | 1.43 | 1.24 | 2.40 | -999 |
| 11 | -9.12 | 132.99 | 1.41 | 1.17 | 0.84 | -999 |
| 11 | -9.20 | 133.43 | 1.18 | 1.05 | 1.86 | -999 |
| 11 | -9.23 | 133.57 | 1.22 | 1.02 | 0.34 | -999 |
| 11 | -9.26 | 133.72 | 1.07 | 1.00 | 0.79 | -999 |
| 11 | -9.34 | 134.16 | 0.86 | 0.90 | 2.50 | -999 |
| 11 | -9.37 | 134.32 | 0.88 | 0.90 | 1.82 | -999 |
| 11 | -9.40 | 134.48 | 0.76 | 0.92 | 2.16 | -999 |
| 11 | -9.50 | 134.96 | 0.96 | 0.94 | 0.91 | -999 |

|    |        |        |       |      |      |      |
|----|--------|--------|-------|------|------|------|
| 11 | -9.52  | 135.09 | 1.21  | 0.98 | 0.74 | -999 |
| 11 | -9.54  | 135.24 | 1.20  | 0.99 | 0.46 | -999 |
| 11 | -9.63  | 135.82 | 1.68  | 1.12 | 1.15 | -999 |
| 11 | -9.66  | 135.96 | 1.60  | 1.08 | -999 | -999 |
| 11 | -9.68  | 136.09 | 2.16  | 1.16 | -999 | -999 |
| 11 | -9.76  | 136.56 | -999  | 1.20 | -999 | -999 |
| 11 | -9.82  | 136.88 | 2.51  | 1.21 | -999 | -999 |
| 11 | -9.91  | 137.38 | 2.74  | 1.16 | -999 | -999 |
| 11 | -9.94  | 137.56 | 2.34  | 1.20 | -999 | -999 |
| 11 | -9.97  | 137.73 | 2.46  | 1.13 | -999 | -999 |
| 11 | -10.05 | 138.24 | 2.13  | 1.21 | -999 | -999 |
| 11 | -10.08 | 138.41 | 1.90  | 1.15 | -999 | -999 |
| 11 | -10.10 | 138.58 | 1.77  | 1.10 | -999 | -999 |
| 11 | -10.19 | 139.06 | 1.65  | 0.99 | -999 | -999 |
| 11 | -10.21 | 139.21 | 1.64  | 1.03 | -999 | -999 |
| 11 | -10.23 | 139.35 | 1.75  | 1.04 | -999 | -999 |
| 11 | -10.33 | 139.97 | 2.18  | 1.29 | -999 | -999 |
| 11 | -10.35 | 140.14 | 2.14  | 1.21 | -999 | -999 |
| 11 | -10.38 | 140.31 | 2.07  | 1.16 | -999 | -999 |
| 11 | -10.46 | 140.83 | 1.73  | 0.89 | -999 | -999 |
| 11 | -10.59 | 141.63 | 10.54 | 2.15 | -999 | -999 |
| 11 | -10.54 | 142.13 | 30.87 | 4.50 | -999 | -999 |
| 11 | -10.49 | 142.32 | 21.85 | 3.97 | -999 | -999 |
| 11 | -10.46 | 142.50 | 14.76 | 3.42 | -999 | -999 |
| 11 | -10.22 | 142.92 | 9.35  | 2.31 | -999 | -999 |
| 11 | -9.94  | 143.10 | 8.85  | 2.51 | -999 | -999 |
| 11 | -9.57  | 143.42 | 10.67 | 2.60 | -999 | -999 |
| 11 | -9.45  | 143.53 | 10.05 | 2.65 | -999 | -999 |
| 11 | -9.36  | 143.68 | 9.93  | 2.58 | -999 | -999 |
| 11 | -9.30  | 144.16 | 7.20  | 2.09 | -999 | -999 |
| 11 | -9.36  | 144.30 | 6.60  | 2.04 | -999 | -999 |
| 11 | -9.48  | 144.42 | 5.95  | 1.83 | -999 | -999 |
| 11 | -9.96  | 145.53 | 4.42  | 1.49 | -999 | -999 |
| 11 | -10.08 | 145.35 | 4.80  | 1.55 | -999 | -999 |
| 11 | -10.19 | 145.07 | 4.15  | 1.46 | -999 | -999 |
| 11 | -10.56 | 145.44 | 3.22  | 1.24 | -999 | -999 |
| 11 | -10.70 | 145.58 | 3.35  | 1.18 | -999 | -999 |
| 11 | -10.81 | 145.70 | 3.13  | 1.19 | -999 | -999 |
| 11 | -11.31 | 146.23 | 2.19  | 1.08 | -999 | -999 |
| 11 | -11.44 | 146.36 | 2.09  | 1.08 | -999 | -999 |
| 11 | -11.79 | 146.74 | 2.41  | 1.30 | -999 | -999 |
| 11 | -11.89 | 146.85 | 2.36  | 1.28 | -999 | -999 |
| 11 | -12.00 | 146.96 | 2.27  | 1.27 | -999 | -999 |
| 11 | -12.33 | 147.31 | 1.85  | 1.14 | -999 | -999 |
| 11 | -12.43 | 147.41 | 1.67  | 1.10 | -999 | -999 |
| 11 | -12.54 | 147.52 | 1.42  | 1.08 | -999 | -999 |
| 11 | -12.95 | 147.96 | 2.43  | 1.43 | 0.96 | -999 |



|    |        |        |      |      |      |      |
|----|--------|--------|------|------|------|------|
| 11 | -13.06 | 148.07 | 2.74 | 1.44 | 0.12 | -999 |
| 11 | -13.16 | 148.18 | 2.84 | 1.44 | -999 | -999 |
| 11 | -13.49 | 148.55 | 3.11 | 1.45 | -999 | -999 |
| 11 | -13.61 | 148.68 | 2.71 | 1.29 | -999 | -999 |
| 11 | -13.73 | 148.81 | 2.36 | 1.21 | -999 | -999 |
| 11 | -14.07 | 149.16 | 2.18 | 1.23 | -999 | -999 |
| 11 | -14.19 | 149.29 | 2.42 | 1.24 | -999 | -999 |
| 11 | -14.32 | 149.42 | 2.40 | 1.22 | -999 | -999 |
| 11 | -14.64 | 149.76 | 1.78 | 1.09 | -999 | -999 |
| 11 | -14.85 | 150.01 | 1.49 | 1.03 | -999 | -999 |
| 11 | -15.13 | 150.34 | 1.33 | 0.96 | -999 | -999 |
| 11 | -15.24 | 150.46 | 1.27 | 0.95 | 0.22 | -999 |
| 11 | -15.34 | 150.57 | 1.18 | 0.95 | 0.29 | -999 |
| 11 | -15.77 | 150.99 | 1.10 | 0.95 | 0.59 | -999 |
| 11 | -15.88 | 151.10 | 1.01 | 0.94 | -999 | -999 |
| 11 | -15.99 | 151.21 | 1.01 | 0.92 | 0.31 | -999 |
| 11 | -16.35 | 151.55 | 0.98 | 0.90 | 0.62 | -999 |
| 11 | -16.45 | 151.66 | 0.95 | 0.77 | -999 | -999 |
| 11 | -16.55 | 151.77 | 1.10 | 0.88 | 0.21 | -999 |
| 11 | -16.88 | 152.13 | 0.82 | 0.91 | 1.00 | -999 |
| 11 | -17.00 | 152.27 | 0.82 | 0.88 | 0.67 | -999 |
| 11 | -17.13 | 152.35 | 0.79 | 0.82 | -999 | -999 |
| 11 | -17.52 | 152.48 | -999 | 0.90 | 0.09 | -999 |
| 11 | -17.67 | 152.53 | 0.90 | 0.88 | -999 | -999 |
| 11 | -17.81 | 152.58 | -999 | 0.86 | -999 | -999 |
| 11 | -18.24 | 152.74 | 0.75 | 0.77 | -999 | -999 |
| 11 | -18.38 | 152.80 | -999 | 0.85 | 0.12 | -999 |
| 11 | -19.07 | 153.07 | 0.68 | 0.77 | -999 | -999 |
| 11 | -19.23 | 153.13 | 0.73 | 0.84 | 1.48 | -999 |
| 11 | -19.38 | 153.19 | 0.68 | 0.80 | 1.66 | -999 |
| 11 | -19.81 | 153.33 | 0.76 | 0.84 | -999 | -999 |
| 11 | -19.97 | 153.38 | 0.78 | 0.63 | 0.61 | -999 |
| 11 | -20.12 | 153.43 | 0.69 | 0.80 | 1.44 | -999 |
| 11 | -20.54 | 153.58 | 0.69 | 0.80 | 0.28 | -999 |
| 11 | -20.68 | 153.63 | 0.71 | 0.78 | -999 | -999 |
| 11 | -20.82 | 153.69 | -999 | 0.79 | 0.06 | -999 |
| 11 | -21.24 | 153.85 | 0.93 | 0.84 | -999 | -999 |
| 11 | -21.37 | 153.89 | 1.04 | 0.83 | 0.30 | -999 |
| 11 | -21.51 | 153.95 | 0.97 | 0.84 | -999 | -999 |
| 11 | -21.96 | 154.05 | 0.96 | 0.85 | -999 | -999 |
| 11 | -22.32 | 154.09 | 1.07 | 0.79 | -999 | -999 |
| 11 | -22.99 | 154.22 | 0.94 | 0.86 | 0.34 | -999 |
| 11 | -23.16 | 154.24 | 0.88 | 0.85 | 0.42 | -999 |
| 11 | -23.32 | 154.26 | 0.91 | 0.87 | 0.97 | -999 |
| 11 | -23.81 | 154.34 | 1.06 | 0.85 | -999 | -999 |
| 11 | -23.97 | 154.37 | 0.99 | 0.84 | 2.25 | -999 |
| 11 | -24.13 | 154.40 | 0.96 | 0.85 | -999 | -999 |

|    |        |        |      |      |      |      |
|----|--------|--------|------|------|------|------|
| 11 | -24.60 | 154.47 | 1.14 | 0.86 | 2.57 | -999 |
| 11 | -24.77 | 154.50 | 1.09 | 0.90 | 2.30 | -999 |
| 11 | -24.93 | 154.53 | 0.99 | 0.87 | 1.93 | -999 |
| 11 | -25.40 | 154.62 | 1.11 | 0.93 | -999 | -999 |
| 11 | -25.56 | 154.65 | 0.99 | 0.89 | 2.63 | -999 |
| 11 | -25.73 | 154.67 | -999 | 0.88 | 2.57 | -999 |
| 11 | -26.21 | 154.75 | 0.86 | 0.88 | -999 | -999 |
| 11 | -26.37 | 154.77 | 0.91 | 0.92 | 2.25 | -999 |
| 11 | -26.52 | 154.79 | 0.97 | 0.92 | 1.90 | -999 |
| 11 | -27.12 | 154.88 | 0.87 | 0.99 | 2.15 | -999 |
| 11 | -27.42 | 154.91 | 0.90 | 0.91 | 2.97 | -999 |
| 11 | -27.88 | 154.96 | 0.70 | 0.85 | 1.61 | -999 |
| 11 | -28.03 | 154.98 | 0.73 | 0.84 | 1.92 | -999 |
| 11 | -28.18 | 155.00 | 0.81 | 0.86 | 2.12 | -999 |
| 11 | -28.63 | 155.09 | 0.73 | 0.84 | -999 | -999 |
| 11 | -28.78 | 155.12 | 0.74 | 0.81 | -999 | -999 |
| 11 | -28.93 | 155.15 | 0.62 | 0.78 | 2.12 | -999 |
| 11 | -29.36 | 155.23 | 0.69 | 0.84 | -999 | -999 |
| 11 | -29.51 | 155.23 | 0.65 | 0.82 | 2.53 | -999 |
| 11 | -30.06 | 155.33 | 0.64 | 0.83 | -999 | -999 |
| 11 | -30.20 | 155.35 | 0.68 | 0.86 | -999 | -999 |
| 11 | -30.33 | 155.37 | 0.61 | 0.82 | 1.60 | -999 |
| 11 | -30.94 | 155.49 | 0.59 | 0.78 | 1.93 | -999 |
| 11 | -31.10 | 155.52 | 0.53 | 0.81 | 2.02 | -999 |
| 11 | -31.26 | 155.56 | 0.57 | 0.80 | 1.78 | -999 |
| 11 | -31.76 | 155.62 | 0.58 | 0.79 | 1.81 | -999 |
| 11 | -31.93 | 155.64 | 0.62 | 0.78 | 1.87 | -999 |
| 11 | -32.09 | 155.68 | 0.47 | 0.76 | 1.22 | -999 |
| 11 | -32.54 | 155.78 | 0.61 | 0.78 | 2.10 | -999 |
| 11 | -32.70 | 155.80 | 0.57 | 0.75 | 1.98 | -999 |
| 11 | -32.86 | 155.81 | 0.55 | 0.73 | 1.94 | -999 |
| 11 | -33.29 | 155.89 | 0.46 | 0.80 | -999 | -999 |
| 11 | -33.43 | 155.92 | 0.49 | 0.75 | -999 | -999 |
| 11 | -33.98 | 156.05 | 0.68 | 0.77 | -999 | -999 |
| 11 | -34.12 | 156.12 | 0.65 | 0.77 | 2.25 | -999 |
| 11 | -34.26 | 156.20 | 0.78 | 0.80 | -999 | -999 |
| 11 | -34.68 | 156.52 | 0.83 | 0.96 | 0.06 | -999 |
| 11 | -34.78 | 156.58 | 0.81 | 0.95 | 0.82 | -999 |
| 11 | -34.90 | 156.66 | 0.97 | 0.88 | -999 | -999 |
| 11 | -35.32 | 156.97 | 0.66 | 0.83 | 1.75 | -999 |
| 11 | -35.46 | 157.08 | 0.75 | 0.87 | 2.19 | -999 |
| 11 | -35.61 | 157.19 | 0.68 | 0.85 | 1.14 | -999 |
| 11 | -36.04 | 157.53 | 0.68 | 0.81 | 0.90 | -999 |
| 11 | -36.19 | 157.64 | 0.63 | 0.80 | 1.73 | -999 |
| 11 | -36.31 | 157.74 | 0.48 | 0.76 | 2.26 | -999 |
| 11 | -36.76 | 158.06 | 0.47 | 0.72 | -999 | -999 |
| 11 | -36.92 | 158.18 | 0.46 | 0.68 | 2.83 | -999 |

|    |        |        |      |      |      |      |
|----|--------|--------|------|------|------|------|
| 11 | -37.02 | 158.27 | 0.57 | 0.59 | -999 | -999 |
| 11 | -37.25 | 158.53 | 0.52 | 0.67 | 1.70 | -999 |
| 11 | -37.33 | 158.62 | 0.52 | 0.82 | 2.01 | -999 |
| 11 | -37.41 | 158.71 | 0.50 | 0.69 | 1.83 | -999 |
| 11 | -37.78 | 159.33 | 0.47 | 0.62 | 1.95 | -999 |
| 11 | -37.86 | 159.49 | 0.39 | 0.79 | 2.00 | -999 |
| 11 | -38.11 | 159.96 | 0.50 | 0.70 | -999 | -999 |
| 11 | -38.20 | 160.13 | 0.43 | 0.66 | -999 | -999 |
| 11 | -38.29 | 160.29 | 0.49 | 0.76 | 2.58 | -999 |
| 11 | -38.56 | 160.79 | 0.53 | 0.69 | -999 | -999 |
| 11 | -38.66 | 160.96 | 0.53 | 0.78 | -999 | -999 |
| 11 | -38.75 | 161.13 | 0.49 | 0.67 | -999 | -999 |
| 11 | -39.01 | 161.63 | 0.46 | 0.70 | -999 | -999 |
| 11 | -39.10 | 161.81 | 0.51 | 0.75 | -999 | -999 |
| 11 | -39.45 | 162.50 | 0.67 | 0.79 | -999 | -999 |
| 11 | -39.52 | 162.63 | 0.58 | 0.74 | -999 | -999 |
| 11 | -39.53 | 162.76 | 0.50 | 0.78 | -999 | -999 |
| 11 | -39.57 | 163.30 | 0.70 | 0.85 | -999 | -999 |
| 11 | -39.60 | 163.56 | 0.74 | 0.83 | -999 | -999 |
| 11 | -39.63 | 164.02 | 0.78 | 0.84 | -999 | -999 |
| 11 | -39.65 | 164.21 | 0.77 | 0.80 | -999 | -999 |
| 11 | -39.74 | 165.02 | 0.55 | 0.82 | -999 | -999 |
| 11 | -39.76 | 165.22 | 0.57 | 0.84 | -999 | -999 |
| 11 | -39.79 | 165.43 | 0.64 | 0.82 | -999 | -999 |
| 11 | -39.84 | 166.04 | 0.51 | 0.77 | -999 | -999 |
| 11 | -39.86 | 166.25 | 0.52 | 0.81 | -999 | -999 |
| 11 | -39.95 | 167.04 | 0.56 | 0.78 | -999 | -999 |
| 11 | -39.96 | 167.18 | 0.61 | 0.78 | -999 | -999 |
| 11 | -40.01 | 167.87 | 0.45 | 0.65 | -999 | -999 |
| 11 | -40.02 | 168.02 | 0.50 | 0.81 | 1.33 | -999 |
| 11 | -40.03 | 168.17 | 0.54 | 0.80 | 1.16 | -999 |
| 11 | -40.08 | 168.78 | 0.59 | 0.84 | 1.41 | -999 |
| 11 | -40.10 | 168.98 | 0.62 | 0.85 | 0.67 | -999 |
| 11 | -40.12 | 169.18 | 0.62 | 0.85 | 1.11 | -999 |
| 11 | -40.17 | 169.82 | 0.67 | 0.71 | 2.32 | -999 |
| 11 | -40.19 | 170.04 | 0.72 | 0.85 | 4.06 | -999 |
| 11 | -40.21 | 170.24 | 0.77 | 0.77 | 2.99 | -999 |
| 11 | -40.28 | 170.87 | 0.79 | 0.90 | 2.98 | -999 |
| 11 | -40.30 | 171.08 | 0.89 | 0.89 | 2.98 | -999 |
| 11 | -40.31 | 171.27 | 0.90 | 0.91 | 2.98 | -999 |
| 11 | -40.35 | 171.71 | 1.01 | 0.93 | 0.32 | -999 |
| 11 | -40.36 | 171.85 | 1.11 | 0.90 | 0.62 | -999 |
| 11 | -40.37 | 171.98 | 1.11 | 0.92 | 0.78 | -999 |
| 11 | -40.47 | 172.75 | -999 | 1.09 | -999 | -999 |
| 11 | -40.51 | 173.15 | 1.52 | 1.05 | -999 | -999 |
| 11 | -40.55 | 173.58 | 1.59 | 1.08 | -999 | -999 |
| 11 | -40.56 | 173.72 | 1.54 | 1.09 | -999 | -999 |

|       |        |        |      |      |      |      |
|-------|--------|--------|------|------|------|------|
| 11    | -40.58 | 173.87 | 1.62 | 1.05 | -999 | -999 |
| 11    | -40.80 | 174.20 | 2.89 | 1.20 | -999 | -999 |
| 11    | -40.90 | 174.30 | 4.01 | 1.45 | 0.51 | -999 |
| 11    | -41.00 | 174.42 | 2.27 | 1.23 | 0.74 | -999 |
| 11    | -41.34 | 174.65 | 2.04 | 1.13 | 0.97 | -999 |
| 11    | -41.44 | 174.74 | 2.28 | 1.10 | -999 | -999 |
| <hr/> |        |        |      |      |      |      |
| 12    | 17.60  | -24.30 | 0.64 | 0.91 | 0.71 | -999 |
| 12    | 17.59  | -24.31 | 0.63 | 0.98 | 0.68 | -999 |
| 12    | 17.60  | -24.30 | 0.58 | 0.99 | 0.68 | -999 |
| 12    | 17.60  | -24.30 | 0.50 | 0.93 | 0.69 | -999 |
| 12    | 17.60  | -24.30 | 0.54 | 0.91 | 0.63 | -999 |
| 12    | 17.60  | -24.30 | 0.62 | 0.93 | 1.00 | -999 |
| 12    | 17.60  | -24.30 | 0.57 | 0.92 | 0.72 | -999 |
| 12    | 17.60  | -24.30 | 0.59 | 0.99 | 0.73 | -999 |
| 12    | 17.60  | -24.30 | 0.65 | 0.95 | 0.72 | -999 |
| 12    | 17.60  | -24.30 | 0.54 | 1.01 | 0.76 | -999 |
| 12    | 17.60  | -24.30 | 0.61 | 0.95 | 0.68 | -999 |
| 12    | 17.60  | -24.30 | 0.56 | 0.94 | 0.73 | -999 |
| 12    | 17.60  | -24.30 | 0.51 | 1.02 | 0.71 | -999 |
| 12    | 17.60  | -24.30 | 0.84 | 1.09 | 0.65 | -999 |
| 12    | 17.60  | -24.30 | 0.64 | 1.03 | 0.67 | -999 |
| 12    | 17.60  | -24.31 | 0.63 | 1.02 | 0.68 | -999 |
| 12    | 17.60  | -24.30 | 0.59 | 0.96 | 0.68 | -999 |
| 12    | 17.60  | -24.30 | 0.60 | 0.99 | 0.73 | -999 |
| 12    | 18.00  | -21.00 | -999 | -999 | -999 | -999 |
| 12    | 18.01  | -21.01 | 2.24 | 1.40 | 1.19 | -999 |
| 12    | 18.00  | -21.00 | 2.12 | 1.41 | 1.19 | -999 |
| 12    | 18.00  | -21.00 | 2.32 | 1.52 | 1.20 | -999 |
| 12    | 18.00  | -21.00 | 2.38 | 1.50 | 1.29 | -999 |
| 12    | 18.00  | -21.00 | 2.06 | 1.44 | 1.26 | -999 |
| 12    | 18.00  | -21.00 | 2.24 | 1.43 | 1.32 | -999 |
| 12    | 18.00  | -21.00 | 1.96 | 1.32 | 1.28 | -999 |
| 12    | 18.00  | -21.00 | 1.39 | 1.44 | 1.07 | -999 |
| 12    | 18.00  | -21.00 | 1.54 | 1.21 | 0.96 | -999 |
| 12    | 18.00  | -21.00 | 1.88 | 1.35 | 0.99 | -999 |
| 12    | 18.01  | -21.02 | 1.56 | 1.12 | 0.95 | -999 |
| 12    | 18.00  | -21.00 | 1.49 | 1.23 | 1.10 | -999 |
| 12    | 18.00  | -21.00 | 1.61 | 1.28 | 1.04 | -999 |
| 12    | 18.00  | -21.00 | 1.64 | 1.59 | 1.15 | -999 |
| 12    | 18.00  | -21.00 | 1.63 | 1.35 | 1.06 | -999 |
| 12    | 18.00  | -21.00 | 1.35 | 1.36 | 0.97 | -999 |
| 12    | 18.00  | -21.00 | 1.46 | 1.30 | 1.01 | -999 |
| 12    | 18.00  | -21.00 | 1.24 | 1.18 | 1.11 | -999 |
| 12    | 18.00  | -21.00 | 1.65 | 1.31 | 1.03 | -999 |
| 12    | 18.00  | -18.35 | -999 | -999 | -999 | -999 |
| 12    | 18.00  | -18.00 | 4.22 | 1.98 | 1.08 | -999 |
| 12    | 18.00  | -18.00 | 4.87 | 2.12 | 0.98 | -999 |

|    |       |        |      |      |      |      |
|----|-------|--------|------|------|------|------|
| 12 | 18.00 | -18.00 | 5.50 | 2.21 | 1.12 | -999 |
| 12 | 18.00 | -18.00 | 5.30 | 2.42 | 1.06 | -999 |
| 12 | 18.00 | -18.00 | 5.38 | 2.34 | 1.06 | -999 |
| 12 | 18.00 | -18.00 | 5.58 | 2.24 | 1.14 | -999 |
| 12 | 18.00 | -18.00 | 5.65 | 2.31 | 1.04 | -999 |
| 12 | 18.00 | -18.00 | 5.78 | 2.29 | 1.08 | -999 |
| 12 | 18.00 | -18.00 | 5.28 | 2.14 | 1.09 | -999 |
| 12 | 18.00 | -18.00 | 6.12 | 2.30 | 1.06 | -999 |
| 12 | 18.00 | -18.00 | 5.32 | 2.24 | 0.95 | -999 |
| 12 | 18.00 | -18.00 | 5.60 | 1.96 | 0.91 | -999 |
| 12 | 18.00 | -18.00 | 5.16 | 2.07 | 1.02 | -999 |
| 12 | 18.00 | -18.00 | 5.12 | 2.05 | 0.90 | -999 |
| 12 | 18.00 | -18.00 | 5.01 | 2.13 | 0.95 | -999 |
| 12 | 18.00 | -18.01 | 5.55 | 2.18 | 1.02 | -999 |
| 12 | 18.00 | -18.00 | 5.20 | 2.12 | 0.98 | -999 |
| 12 | 18.00 | -16.79 | -999 | -999 | -999 | -999 |
| 12 | 18.00 | -16.70 | -999 | -999 | -999 | -999 |
| 12 | 18.00 | -16.53 | -999 | -999 | -999 | -999 |
| 12 | 18.50 | -16.50 | 5.43 | 2.53 | 1.61 | -999 |
| 12 | 18.50 | -16.53 | 5.04 | 2.24 | 1.43 | -999 |
| 12 | 18.50 | -16.50 | 4.76 | 2.36 | 1.41 | -999 |
| 12 | 18.50 | -16.50 | 4.83 | 2.35 | 1.29 | -999 |
| 12 | 18.50 | -16.50 | 4.92 | 2.11 | 1.13 | -999 |
| 12 | 18.50 | -16.51 | 4.87 | 2.14 | 1.11 | -999 |
| 12 | 18.50 | -16.51 | 4.61 | 2.04 | 1.28 | -999 |
| 12 | 18.50 | -16.50 | 4.21 | 2.38 | 1.28 | -999 |
| 12 | 18.50 | -16.50 | 4.74 | 2.28 | 1.35 | -999 |
| 12 | 18.50 | -16.50 | 5.00 | 2.30 | 1.50 | -999 |
| 12 | 18.50 | -16.50 | 5.71 | 2.38 | 1.44 | -999 |
| 12 | 18.50 | -16.50 | 5.96 | 2.64 | 1.51 | -999 |
| 12 | 18.50 | -16.50 | 6.58 | 2.87 | 2.06 | -999 |
| 12 | 18.50 | -16.50 | 6.42 | 2.77 | 2.61 | -999 |
| 12 | 18.50 | -16.50 | 6.13 | 2.63 | 2.68 | -999 |
| 12 | 18.51 | -16.50 | 5.97 | 2.48 | 2.65 | -999 |
| 12 | 18.57 | -16.50 | 5.62 | 2.65 | 2.61 | -999 |
| 12 | 18.83 | -16.50 | -999 | -999 | -999 | -999 |
| 12 | 18.98 | -16.55 | -999 | -999 | -999 | -999 |
| 12 | 19.00 | -16.57 | 5.91 | 2.72 | 1.56 | -999 |
| 12 | 19.00 | -16.57 | 5.91 | 2.79 | 1.80 | -999 |
| 12 | 19.00 | -16.57 | 6.68 | 2.90 | 1.77 | -999 |
| 12 | 19.01 | -16.57 | 8.69 | 3.14 | 2.02 | -999 |
| 12 | 19.01 | -16.57 | 8.92 | 2.93 | 1.78 | -999 |
| 12 | 19.00 | -16.57 | 8.29 | 2.94 | -999 | -999 |
| 12 | 19.00 | -16.57 | 8.52 | 2.99 | 1.80 | -999 |
| 12 | 19.00 | -16.57 | 6.74 | 2.55 | 2.69 | -999 |
| 12 | 19.00 | -16.57 | 6.82 | 2.52 | 2.70 | -999 |
| 12 | 19.00 | -16.57 | 6.78 | 2.60 | 2.83 | -999 |

|    |       |        |      |      |      |      |
|----|-------|--------|------|------|------|------|
| 12 | 19.00 | -16.57 | 7.35 | 2.74 | 2.96 | -999 |
| 12 | 19.00 | -16.57 | 6.11 | 2.82 | 2.92 | -999 |
| 12 | 19.00 | -16.57 | 6.59 | 2.63 | 2.69 | -999 |
| 12 | 19.00 | -16.57 | 6.30 | 2.50 | 2.36 | -999 |
| 12 | 19.01 | -16.58 | 6.15 | 2.68 | 2.54 | -999 |
| 12 | 19.00 | -16.57 | 7.25 | 2.81 | 2.44 | -999 |
| 12 | 19.00 | -16.57 | 7.15 | 2.67 | 2.86 | -999 |
| 12 | 19.00 | -16.57 | 5.35 | 2.87 | 2.66 | -999 |
| 12 | 19.02 | -16.59 | 6.68 | 2.98 | 1.93 | -999 |
| 12 | 20.00 | -17.25 | 4.61 | 2.10 | 1.31 | -999 |
| 12 | 20.00 | -17.25 | 4.51 | 2.11 | 1.27 | -999 |
| 12 | 20.00 | -17.25 | 4.39 | 2.14 | 1.16 | -999 |
| 12 | 20.00 | -17.25 | 5.46 | 2.18 | 1.08 | -999 |
| 12 | 20.00 | -17.25 | 5.00 | 2.21 | 1.13 | -999 |
| 12 | 20.00 | -17.25 | 5.32 | 2.06 | 1.20 | -999 |
| 12 | 20.00 | -17.25 | 6.01 | 2.34 | 1.25 | -999 |
| 12 | 20.00 | -17.25 | 5.19 | 2.17 | 1.43 | -999 |
| 12 | 20.00 | -17.25 | 5.87 | 2.33 | 1.40 | -999 |
| 12 | 20.00 | -17.25 | 5.43 | 2.11 | 1.43 | -999 |
| 12 | 20.00 | -17.25 | 4.79 | 2.11 | 1.15 | -999 |
| 12 | 20.00 | -17.25 | 4.81 | 2.02 | 1.19 | -999 |
| 12 | 20.00 | -17.25 | 5.36 | 2.22 | 1.25 | -999 |
| 12 | 20.00 | -17.25 | 4.37 | 1.97 | 1.07 | -999 |
| 12 | 20.00 | -17.25 | 4.07 | 2.10 | 1.13 | -999 |
| 12 | 20.00 | -17.25 | 4.24 | 1.87 | 1.19 | -999 |
| 12 | 20.00 | -17.25 | 4.38 | 1.96 | 1.16 | -999 |
| 12 | 20.00 | -17.25 | 4.08 | 1.95 | 1.16 | -999 |
| 12 | 20.00 | -17.25 | 4.24 | 2.19 | 1.25 | -999 |
| 12 | 20.00 | -17.25 | 4.19 | 2.02 | 1.41 | -999 |
| 13 | 54.33 | 14.25  | 2.47 | 2.02 | -999 | -999 |
| 13 | 54.68 | 14.20  | 2.17 | 0.54 | -999 | -999 |
| 13 | 54.97 | 13.28  | -999 | 0.98 | -999 | -999 |
| 13 | 54.95 | 13.32  | 2.65 | 1.85 | -999 | -999 |
| 13 | 54.83 | 13.38  | 2.05 | 2.43 | -999 | -999 |
| 13 | 54.58 | 10.58  | 1.86 | 1.77 | -999 | -999 |
| 13 | 54.45 | 10.18  | 6.02 | 2.02 | -999 | -999 |
| 13 | 54.45 | 10.18  | 4.59 | 1.79 | -999 | -999 |
| 13 | 54.45 | 10.18  | 2.59 | 2.18 | -999 | -999 |
| 13 | 54.45 | 10.18  | 3.16 | 1.41 | -999 | -999 |
| 13 | 54.45 | 10.18  | 2.55 | 1.27 | -999 | -999 |
| 13 | 54.45 | 10.18  | 2.18 | 2.32 | -999 | -999 |
| 13 | 54.45 | 10.18  | 2.36 | 0.82 | -999 | -999 |
| 13 | 54.45 | 10.18  | 1.53 | 0.53 | -999 | -999 |
| 13 | 54.45 | 10.18  | 2.34 | 1.49 | -999 | -999 |
| 13 | 54.45 | 10.18  | 3.15 | 1.53 | -999 | -999 |
| 13 | 54.45 | 10.18  | 2.95 | 1.33 | -999 | -999 |

|    |       |       |      |      |      |      |
|----|-------|-------|------|------|------|------|
| 14 | 54.25 | 10.13 | 0.84 | 0.48 | -999 | -999 |
| 14 | 54.22 | 10.10 | 3.34 | 0.66 | -999 | -999 |
| 14 | 54.32 | 10.14 | 1.65 | 1.37 | -999 | -999 |
| 14 | 54.36 | 10.90 | 2.66 | 1.66 | -999 | -999 |
| 14 | 54.23 | 11.80 | -999 | -999 | -999 | -999 |
| 14 | 54.21 | 11.52 | -999 | -999 | -999 | -999 |
| 14 | 55.28 | 16.00 | 4.03 | 1.26 | -999 | -999 |
| 14 | 55.28 | 16.00 | 2.04 | 1.04 | -999 | -999 |
| 14 | 55.33 | 16.60 | -999 | -999 | -999 | -999 |
| 14 | 57.18 | 20.04 | 1.86 | 1.06 | -999 | -999 |
| 14 | 57.18 | 20.05 | 0.64 | 0.61 | -999 | -999 |
| 14 | 57.17 | 20.03 | 2.06 | 1.20 | -999 | -999 |
| 14 | 57.18 | 20.04 | 0.91 | 0.58 | -999 | -999 |
| 14 | 57.17 | 20.05 | 1.37 | 1.16 | -999 | -999 |
| 14 | 55.21 | 15.30 | 0.87 | 0.57 | -999 | -999 |
| 14 | 55.21 | 15.80 | 1.12 | 1.06 | -999 | -999 |
| 14 | 55.17 | 15.00 | -999 | 0.53 | -999 | -999 |
| 14 | 55.17 | 14.34 | -999 | -999 | -999 | -999 |
| 15 | 57.17 | 19.60 | 1.95 | 1.38 | -999 | -999 |
| 15 | 57.36 | 19.96 | 2.01 | 1.67 | -999 | -999 |
| 15 | 57.36 | 19.96 | 1.98 | 1.46 | -999 | -999 |
| 15 | 59.44 | 21.26 | 2.13 | 1.92 | -999 | -999 |
| 15 | 59.57 | 23.44 | 1.48 | 1.70 | -999 | -999 |
| 15 | 59.70 | 24.26 | 1.49 | 1.36 | -999 | -999 |
| 15 | 59.55 | 22.45 | 1.83 | 1.81 | -999 | -999 |
| 15 | 59.37 | 20.11 | 3.33 | 1.72 | -999 | -999 |
| 15 | 59.21 | 19.00 | 1.57 | 1.74 | -999 | -999 |
| 15 | -999  | -999  | 3.39 | 2.13 | -999 | -999 |
| 15 | 55.25 | 15.99 | 2.27 | 1.84 | -999 | -999 |
| 15 | 54.65 | 12.38 | 1.72 | 1.55 | -999 | -999 |
| 15 | 54.49 | 11.72 | 2.20 | 1.72 | -999 | -999 |
| 15 | 54.34 | 10.10 | 1.30 | 1.27 | -999 | -999 |
| 15 | 55.43 | 10.98 | 2.47 | 1.64 | -999 | -999 |
| 15 | 56.23 | 11.33 | 2.10 | 1.30 | -999 | -999 |
| 15 | 56.49 | 11.62 | 1.88 | 1.59 | -999 | -999 |
| 15 | 57.95 | 10.10 | 2.46 | 1.91 | -999 | -999 |
| 15 | 58.08 | 9.24  | 2.22 | 1.78 | -999 | -999 |
| 15 | -999  | -999  | 3.09 | 1.65 | -999 | -999 |
| 15 | -999  | -999  | 2.75 | 2.16 | -999 | -999 |
| 15 | 58.06 | 9.26  | 2.10 | 1.52 | -999 | -999 |
| 15 | 58.03 | 9.22  | 2.09 | 1.74 | -999 | -999 |
| 15 | 57.93 | 8.88  | -999 | 1.41 | -999 | -999 |
| 15 | 57.70 | 8.27  | 1.99 | 1.82 | -999 | -999 |
| 15 | 57.80 | 5.20  | 1.83 | 1.39 | -999 | -999 |
| 15 | 58.15 | 2.46  | 2.23 | 1.64 | -999 | -999 |
| 15 | 58.32 | 1.46  | 2.23 | 1.69 | -999 | -999 |
| 15 | 58.18 | 0.76  | 2.05 | 1.94 | -999 | -999 |

|    |       |      |      |      |      |      |
|----|-------|------|------|------|------|------|
| 15 | 57.84 | 1.26 | 2.09 | 1.84 | -999 | -999 |
| 15 | 57.16 | 2.10 | 1.77 | 1.35 | -999 | -999 |
| 15 | 55.17 | 5.08 | 2.11 | 1.68 | -999 | -999 |
| 15 | 54.96 | 5.64 | 1.85 | 1.82 | -999 | -999 |
| 15 | 54.74 | 6.25 | 2.09 | 1.84 | -999 | -999 |
| 15 | 54.53 | 6.78 | 2.21 | 1.88 | -999 | -999 |
| 15 | 54.32 | 7.31 | 2.14 | 1.79 | -999 | -999 |
| 15 | -999  | -999 | 1.32 | 1.62 | -999 | -999 |
| 15 | 54.25 | 7.54 | 0.83 | 1.41 | -999 | -999 |
| 15 | 53.94 | 8.60 | 1.93 | 1.69 | -999 | -999 |
| 15 | 53.84 | 8.84 | 1.43 | 1.79 | -999 | -999 |
| 15 | 53.87 | 9.08 | 2.54 | 4.96 | -999 | -999 |
| 15 | 53.85 | 9.30 | 1.98 | 2.00 | -999 | -999 |
| 15 | 53.90 | 9.15 | 1.77 | 1.99 | -999 | -999 |
| 15 | -999  | -999 | 1.59 | 3.90 | -999 | -999 |
| 15 | 54.26 | 9.63 | 1.19 | 1.57 | -999 | -999 |
| 16 | 54.86 | 3.53 | 2.61 | 1.23 | -999 | -999 |
| 16 | 55.56 | 2.23 | 2.47 | 1.28 | -999 | -999 |
| 16 | 55.67 | 2.02 | 3.12 | 1.32 | -999 | -999 |
| 16 | 55.26 | 2.53 | 1.14 | 1.23 | -999 | -999 |
| 16 | 55.26 | 2.52 | 1.49 | 0.90 | -999 | -999 |
| 16 | 55.49 | 2.38 | 2.22 | 1.13 | -999 | -999 |
| 16 | 55.51 | 2.21 | 1.63 | 1.23 | -999 | -999 |
| 16 | 55.41 | 2.25 | 2.42 | 1.50 | -999 | -999 |
| 16 | 55.33 | 2.05 | 3.25 | 0.71 | -999 | -999 |
| 16 | 55.11 | 2.30 | 2.45 | 1.22 | -999 | -999 |
| 16 | 54.92 | 2.74 | 2.45 | 0.96 | -999 | -999 |
| 16 | 54.69 | 3.26 | 3.62 | 1.63 | -999 | -999 |
| 16 | 54.60 | 3.99 | 3.87 | 0.34 | -999 | -999 |
| 16 | 54.49 | 4.03 | 3.38 | 1.37 | -999 | -999 |
| 16 | 54.69 | 3.29 | 3.06 | 1.31 | -999 | -999 |
| 16 | 55.09 | 2.63 | 3.23 | 1.43 | -999 | -999 |
| 16 | 55.10 | 2.50 | 2.79 | 1.51 | -999 | -999 |
| 16 | 55.05 | 2.10 | 1.51 | 1.13 | -999 | -999 |
| 16 | 55.09 | 2.59 | 1.74 | 1.44 | -999 | -999 |
| 16 | 55.05 | 2.41 | 2.27 | 1.36 | -999 | -999 |
| 16 | 54.98 | 2.33 | 1.64 | 0.85 | -999 | -999 |
| 16 | 55.19 | 1.98 | 2.08 | 1.15 | -999 | -999 |
| 16 | 55.12 | 1.74 | 2.02 | 1.38 | -999 | -999 |
| 16 | 55.18 | 1.18 | 1.95 | 2.04 | -999 | -999 |
| 16 | 54.15 | 7.71 | 2.78 | 1.50 | -999 | -999 |
| 17 | 55.98 | 4.81 | 3.59 | 2.12 | -999 | -999 |
| 17 | 55.27 | 5.26 | 1.47 | 1.64 | -999 | -999 |
| 17 | 55.94 | 5.29 | 1.31 | 1.54 | -999 | -999 |
| 17 | 55.40 | 5.58 | -999 | -999 | -999 | -999 |
| 17 | 55.66 | 5.47 | 1.25 | 1.28 | -999 | -999 |
| 17 | 55.68 | 5.48 | 2.14 | 2.18 | -999 | -999 |



|       |       |      |      |      |      |      |
|-------|-------|------|------|------|------|------|
| 17    | 55.68 | 4.54 | 2.30 | 1.65 | -999 | -999 |
| 17    | 55.99 | 4.30 | 1.67 | 1.36 | -999 | -999 |
| 17    | 55.96 | 4.24 | 2.59 | 1.99 | -999 | -999 |
| 17    | 55.85 | 5.39 | 0.94 | 1.08 | -999 | -999 |
| 17    | 55.67 | 5.51 | 1.47 | 1.53 | -999 | -999 |
| 17    | 55.65 | 5.28 | 1.05 | 1.52 | -999 | -999 |
| 17    | 55.67 | 5.42 | 0.81 | 1.04 | -999 | -999 |
| 17    | 55.67 | 5.46 | 1.34 | 1.55 | -999 | -999 |
| 17    | 55.61 | 5.32 | 0.83 | 1.29 | -999 | -999 |
| 17    | 55.03 | 4.51 | 0.28 | 0.81 | -999 | -999 |
| <hr/> |       |      |      |      |      |      |
| 18    | 55.17 | 7.28 | 2.41 | 1.53 | -999 | -999 |
| 18    | 55.17 | 7.28 | 1.66 | 1.81 | -999 | -999 |
| 18    | 55.17 | 7.28 | 0.43 | 1.54 | -999 | -999 |
| 18    | 55.17 | 7.28 | 3.21 | 1.53 | -999 | -999 |
| 18    | 55.17 | 7.28 | 0.80 | 1.03 | -999 | -999 |
| 18    | 55.17 | 7.28 | 2.06 | 1.04 | -999 | -999 |
| 18    | 55.17 | 7.28 | 2.06 | 1.99 | -999 | -999 |
| 18    | 55.17 | 7.28 | 1.26 | 2.23 | -999 | -999 |
| 18    | 55.17 | 7.28 | 1.57 | 2.26 | -999 | -999 |
| 18    | 55.17 | 7.28 | 1.31 | 2.34 | -999 | -999 |
| 18    | 55.17 | 7.28 | 1.29 | 1.11 | -999 | -999 |
| 18    | 55.17 | 7.28 | -999 | 0.66 | -999 | -999 |
| <hr/> |       |      |      |      |      |      |
| 19    | 55.03 | 8.40 | 1.08 | 1.36 | -999 | -999 |
| 19    | 55.03 | 8.40 | 0.83 | 1.55 | -999 | -999 |
| 19    | 55.03 | 8.40 | 1.22 | 0.76 | -999 | -999 |
| 19    | 55.03 | 8.40 | -999 | 1.16 | -999 | -999 |
| 19    | 55.03 | 8.40 | -999 | 0.65 | -999 | -999 |
| 19    | 54.83 | 8.30 | 0.31 | 0.59 | -999 | -999 |
| 19    | 55.03 | 8.40 | 0.23 | 0.93 | -999 | -999 |
| 19    | 55.03 | 8.40 | -999 | 1.08 | -999 | -999 |
| 19    | 55.03 | 8.40 | 1.45 | 1.45 | -999 | -999 |
| 19    | 55.03 | 8.40 | 2.09 | 0.97 | -999 | -999 |
| 19    | 55.03 | 8.37 | 3.62 | 1.98 | -999 | -999 |
| 19    | 55.03 | 8.37 | 4.53 | 1.66 | -999 | -999 |
| 19    | 55.03 | 8.37 | 1.46 | 1.49 | -999 | -999 |
| 19    | 55.03 | 8.37 | 1.35 | 1.02 | -999 | -999 |
| 19    | 55.03 | 8.45 | 1.54 | 0.97 | -999 | -999 |
| 19    | 55.03 | 8.40 | -999 | 2.18 | -999 | -999 |
| 19    | 55.03 | 8.45 | 3.46 | 1.47 | -999 | -999 |
| 19    | 55.03 | 8.45 | 3.38 | 1.34 | -999 | -999 |
| 19    | 55.03 | 8.37 | 3.98 | 2.78 | -999 | -999 |
| 19    | 55.03 | 8.37 | 1.48 | 1.33 | -999 | -999 |
| 19    | 55.03 | 8.37 | 4.07 | 1.22 | -999 | -999 |
| 19    | 55.03 | 8.45 | 0.97 | 0.82 | -999 | -999 |
| 19    | 55.03 | 8.45 | 1.69 | 1.15 | -999 | -999 |
| 19    | 55.03 | 8.40 | 1.58 | 1.29 | -999 | -999 |
| 19    | 55.03 | 8.40 | 1.98 | 1.26 | -999 | -999 |

|       |       |        |      |      |      |      |
|-------|-------|--------|------|------|------|------|
| 19    | 55.03 | 8.40   | 1.27 | 1.15 | -999 | -999 |
| 19    | 55.03 | 8.37   | 2.02 | 1.45 | -999 | -999 |
| 19    | 55.03 | 8.37   | 1.95 | 1.06 | -999 | -999 |
| 19    | 55.03 | 8.37   | 0.84 | 1.24 | -999 | -999 |
| 19    | 55.03 | 8.37   | 1.72 | 1.09 | -999 | -999 |
| 19    | 54.92 | 8.30   | 1.59 | 1.09 | -999 | -999 |
| 19    | 55.03 | 8.40   | 3.47 | 1.41 | -999 | -999 |
| 19    | 54.92 | 8.30   | 1.79 | 0.84 | -999 | -999 |
| 19    | 54.92 | 8.30   | 6.70 | 3.04 | -999 | -999 |
| 19    | 54.92 | 8.30   | 5.16 | 2.54 | -999 | -999 |
| 19    | 54.92 | 8.30   | 0.16 | 0.41 | -999 | -999 |
| <hr/> |       |        |      |      |      |      |
| 20    | 57.67 | 11.87  | 2.27 | 1.63 | -999 | -999 |
| 20    | 57.67 | 11.87  | 3.41 | 1.34 | -999 | -999 |
| 20    | 57.50 | 11.93  | 7.93 | 2.30 | -999 | -999 |
| 20    | 57.50 | 11.93  | 7.12 | 1.71 | -999 | -999 |
| 20    | 57.50 | 11.93  | 8.07 | 3.71 | -999 | -999 |
| 20    | 57.50 | 11.93  | 9.06 | 2.70 | -999 | -999 |
| 20    | 57.50 | 11.93  | 9.04 | 2.82 | -999 | -999 |
| 20    | 57.50 | 11.93  | 8.36 | 3.21 | -999 | -999 |
| <hr/> |       |        |      |      |      |      |
| 21    | 78.65 | 4.81   | 0.97 | 1.55 | -999 | -999 |
| 21    | 78.23 | 15.63  | 3.63 | 2.01 | -999 | -999 |
| 21    | 83.57 | 27.82  | 3.97 | 1.75 | -999 | -999 |
| 21    | 85.07 | 42.29  | 0.53 | 1.23 | -999 | -999 |
| 21    | 86.08 | 52.76  | 0.62 | 0.92 | -999 | -999 |
| 21    | 87.31 | 64.39  | 0.84 | 1.49 | -999 | -999 |
| 21    | 87.30 | 64.38  | -999 | -999 | -999 | -999 |
| 21    | 87.30 | 64.37  | -999 | -999 | -999 | -999 |
| 21    | 88.26 | 118.62 | 2.27 | 1.95 | -999 | -999 |
| 21    | 88.02 | 163.93 | 1.27 | 2.11 | -999 | -999 |
| 21    | 88.28 | 9.37   | 0.56 | 1.35 | -999 | -999 |
| 21    | 86.75 | 10.11  | 0.89 | 0.59 | -999 | -999 |
| 21    | 85.98 | -0.03  | 1.69 | 1.69 | -999 | -999 |
| 21    | 85.30 | -14.10 | 1.25 | 1.31 | -999 | -999 |
| 21    | 85.08 | -15.09 | 1.36 | 1.00 | -999 | -999 |
| 21    | 84.61 | -6.02  | -999 | 0.06 | -999 | -999 |
| 21    | 84.61 | -5.98  | 1.39 | 1.64 | -999 | -999 |
| 21    | 83.59 | 4.36   | 2.14 | 1.84 | -999 | -999 |
| 21    | 83.29 | 8.21   | 2.15 | 1.87 | -999 | -999 |
| <hr/> |       |        |      |      |      |      |
| 22    | 26.58 | -65.08 | 0.10 | -999 | -999 | 5.00 |
| 22    | 26.80 | -64.83 | 0.08 | -999 | -999 | 5.00 |
| 22    | 27.03 | -64.57 | 0.56 | 0.65 | -999 | 5.00 |
| 22    | 27.05 | -64.59 | 0.54 | 3.71 | -999 | 5.00 |
| 22    | 28.33 | -62.96 | 0.64 | 2.06 | 0.22 | 5.00 |
| 22    | 28.41 | -62.87 | 0.29 | 0.05 | 0.21 | 5.00 |
| 22    | 28.79 | -62.42 | 1.67 | 2.52 | 0.22 | 5.00 |
| 22    | 29.46 | -61.61 | 0.95 | 1.94 | 0.25 | 5.00 |
| 22    | 29.72 | -61.30 | 2.13 | -999 | -999 | 5.00 |

|    |       |        |      |      |      |      |
|----|-------|--------|------|------|------|------|
| 22 | 29.72 | -61.30 | 1.14 | 1.89 | 0.23 | 5.00 |
| 22 | 29.90 | -61.05 | 0.48 | 1.99 | -999 | 5.00 |
| 22 | 31.99 | -58.09 | 0.34 | 0.95 | -999 | 5.00 |
| 22 | 32.44 | -57.47 | 1.01 | 1.14 | -999 | 5.00 |
| 22 | 33.08 | -56.57 | 0.58 | 1.08 | 0.16 | 5.00 |
| 22 | 33.14 | -56.49 | 0.69 | 1.17 | -999 | 5.00 |
| 22 | 33.14 | -56.49 | 0.22 | 1.02 | -999 | 5.00 |
| 22 | 36.29 | -56.40 | 1.31 | -999 | -999 | 5.00 |
| 22 | 36.29 | -56.40 | 1.29 | -999 | -999 | 5.00 |
| 22 | 35.44 | -56.00 | 1.23 | 0.14 | -999 | 5.00 |
| 22 | 34.00 | -55.46 | 1.65 | 0.28 | -999 | 5.00 |
| 22 | 33.47 | -55.30 | 0.06 | 0.03 | -999 | 5.00 |
| 22 | 32.95 | -55.12 | 0.79 | 0.13 | -999 | 5.00 |
| 22 | 31.00 | -54.46 | 1.58 | 1.15 | -999 | 5.00 |
| 22 | 30.84 | -54.41 | 2.09 | 1.21 | 0.21 | 5.00 |
| 22 | 28.19 | -53.86 | 2.58 | 1.39 | 0.15 | 5.00 |
| 22 | 28.92 | -53.04 | 3.11 | -999 | -999 | 5.00 |
| 22 | 29.57 | -52.33 | -999 | -999 | -999 | 5.00 |
| 22 | 30.21 | -51.87 | 2.96 | 1.56 | -999 | 5.00 |
| 22 | 31.75 | -50.75 | 1.23 | 0.76 | 0.13 | 5.00 |
| 22 | 32.04 | -50.60 | 1.73 | 1.31 | -999 | 5.00 |
| 22 | 32.59 | -50.31 | 1.37 | 1.13 | -999 | 5.00 |
| 22 | 32.93 | -50.12 | 1.38 | 1.18 | 0.18 | 5.00 |
| 22 | 34.53 | -49.28 | 1.34 | 1.15 | 0.11 | 5.00 |
| 22 | 34.93 | -49.07 | 0.47 | 0.34 | 0.56 | 5.00 |
| 22 | 35.15 | -48.80 | 2.63 | 2.07 | 0.23 | 5.00 |
| 22 | 35.29 | -48.54 | 2.55 | 1.52 | 0.14 | 5.00 |
| 22 | 36.09 | -47.03 | 1.54 | 1.23 | 0.08 | 5.00 |
| 22 | 36.37 | -46.73 | 3.69 | 2.10 | 0.00 | 5.00 |
| 22 | 36.84 | -46.16 | 2.53 | 1.76 | 0.13 | 5.00 |
| 22 | 38.10 | -44.88 | 1.74 | 1.25 | 0.09 | 5.00 |
| 22 | 38.68 | -44.32 | 1.39 | 1.27 | 0.08 | 5.00 |
| 22 | 39.00 | -44.00 | 1.62 | 1.33 | -999 | 5.00 |
| 22 | 40.90 | -42.74 | 1.14 | 0.96 | 0.06 | 5.00 |
| 22 | 41.68 | -42.21 | 1.78 | 1.68 | -999 | 5.00 |
| 22 | 41.99 | -41.99 | 1.12 | 1.06 | -999 | 5.00 |
| 22 | 40.01 | -42.75 | 0.51 | 0.46 | -999 | 5.00 |
| 22 | 39.42 | -42.97 | 1.28 | 1.50 | 0.14 | 5.00 |
| 22 | 38.75 | -43.21 | 1.13 | 1.17 | 0.14 | 5.00 |
| 22 | 36.29 | -44.11 | 1.10 | 1.23 | 0.14 | 5.00 |
| 22 | 35.73 | -44.27 | 1.10 | 1.17 | 0.14 | 5.00 |
| 22 | 34.99 | -44.54 | 1.03 | 1.14 | 0.15 | 5.00 |
| 22 | 32.63 | -45.34 | 1.30 | 1.12 | 0.11 | 5.00 |
| 22 | 32.18 | -45.51 | 0.87 | 0.97 | 0.10 | 5.00 |
| 22 | 32.27 | -45.12 | 0.93 | 1.00 | 0.11 | 5.00 |
| 22 | 32.77 | -42.73 | 0.80 | 1.02 | -999 | 5.00 |
| 22 | 32.94 | -41.81 | 0.89 | 1.00 | 0.13 | 5.00 |

|       |       |        |      |      |      |      |
|-------|-------|--------|------|------|------|------|
| 22    | 33.01 | -41.48 | 0.79 | 1.07 | -999 | 5.00 |
| 22    | 33.24 | -39.39 | 1.04 | 1.12 | 0.17 | 5.00 |
| 22    | 33.35 | -38.22 | 1.01 | 1.13 | 0.17 | 5.00 |
| 22    | 33.53 | -35.89 | 1.43 | 1.12 | 0.15 | 5.00 |
| 22    | 33.49 | -34.82 | 1.64 | 1.29 | 0.11 | 5.00 |
| 22    | 33.71 | -32.34 | 1.42 | 1.30 | -999 | 5.00 |
| 22    | 33.83 | -31.81 | 1.13 | 1.27 | 0.09 | 5.00 |
| 22    | 33.97 | -30.80 | 1.42 | 1.28 | 0.10 | 5.00 |
| 22    | 33.35 | -29.47 | 1.52 | 1.18 | 0.10 | 5.00 |
| 22    | 32.58 | -28.58 | 1.47 | 1.27 | 0.10 | 5.00 |
| 22    | 30.91 | -26.83 | 1.76 | 1.03 | 0.08 | 5.00 |
| 22    | 30.81 | -26.76 | 1.13 | 1.09 | 0.08 | 5.00 |
| 22    | 33.17 | -25.50 | 4.77 | 1.63 | 0.93 | 5.00 |
| 22    | 33.76 | -25.13 | 1.08 | 1.16 | 0.48 | 5.00 |
| 22    | 34.77 | -23.10 | 1.28 | 1.31 | 1.07 | 5.00 |
| 22    | 35.42 | -23.85 | 0.69 | 0.39 | 0.23 | 5.00 |
| 22    | 35.53 | -23.98 | 4.19 | 1.01 | 0.77 | 5.00 |
| 22    | 37.65 | -24.83 | 1.70 | -999 | 0.63 | 5.00 |
| 22    | 37.69 | -22.06 | 1.19 | -999 | 0.89 | 5.00 |
| 22    | 37.69 | -22.06 | 1.19 | -999 | 0.89 | 5.00 |
| 22    | 37.85 | -20.97 | 0.73 | 0.45 | 0.31 | 5.00 |
| 22    | 37.91 | -18.26 | 0.91 | 1.17 | 0.76 | 5.00 |
| 22    | 37.87 | -17.51 | 1.46 | 0.97 | 0.55 | 5.00 |
| 22    | 37.72 | -15.14 | 1.23 | 1.36 | 0.96 | 5.00 |
| 22    | 37.65 | -14.21 | 1.09 | 1.14 | 0.87 | 5.00 |
| 22    | 37.59 | -13.48 | 1.73 | 1.31 | 0.96 | 5.00 |
| <hr/> |       |        |      |      |      |      |
| 23    | 54.38 | 8.67   | 4.85 | 2.23 | -999 | -999 |
| 23    | 54.38 | 8.67   | 5.29 | 2.83 | -999 | -999 |
| 23    | 54.38 | 8.67   | 3.98 | 2.00 | -999 | -999 |
| 23    | 54.38 | 8.67   | 0.75 | 2.67 | -999 | -999 |
| 23    | 54.38 | 8.67   | 5.35 | 2.40 | -999 | -999 |
| 23    | 54.38 | 8.67   | 2.05 | 2.50 | -999 | -999 |
| 23    | 54.38 | 8.67   | 2.58 | 2.01 | -999 | -999 |
| 23    | 54.38 | 8.67   | 2.31 | 1.97 | -999 | -999 |
| 23    | 54.38 | 8.67   | 1.92 | 2.23 | -999 | -999 |
| 23    | 54.38 | 8.67   | 2.95 | 2.29 | -999 | -999 |
| 23    | 54.38 | 8.67   | 2.24 | 1.76 | -999 | -999 |
| 23    | 54.38 | 8.67   | 4.23 | 2.19 | -999 | -999 |
| 23    | 54.38 | 8.67   | 1.61 | 2.49 | -999 | -999 |
| 23    | 54.38 | 8.67   | 0.12 | 1.39 | -999 | -999 |
| 23    | 54.38 | 8.67   | 1.37 | 2.12 | -999 | -999 |
| 23    | 54.38 | 8.67   | 5.30 | 2.19 | -999 | -999 |
| <hr/> |       |        |      |      |      |      |
| 24    | 54.92 | 8.30   | 3.79 | 2.35 | -999 | -999 |
| 24    | 54.92 | 8.30   | 1.58 | 1.37 | -999 | -999 |
| 24    | 54.92 | 8.30   | 1.47 | 1.32 | -999 | -999 |
| 24    | 54.92 | 8.30   | 3.76 | 2.20 | -999 | -999 |
| 24    | 54.92 | 8.30   | 1.38 | 1.28 | -999 | -999 |

|       |        |        |       |       |      |         |
|-------|--------|--------|-------|-------|------|---------|
| 24    | 54.92  | 8.30   | 0.19  | 1.42  | -999 | -999    |
| 24    | 54.92  | 8.30   | 2.60  | 2.20  | -999 | -999    |
| 24    | 54.92  | 8.30   | 2.59  | 2.05  | -999 | -999    |
| 24    | 54.92  | 8.30   | 2.47  | 2.07  | -999 | -999    |
| 24    | 54.92  | 8.30   | 2.69  | 2.12  | -999 | -999    |
| 24    | 54.92  | 8.30   | 2.43  | 2.14  | -999 | -999    |
| 24    | 54.92  | 8.30   | 1.35  | 0.82  | -999 | -999    |
| 24    | 54.92  | 8.30   | 1.94  | 1.96  | -999 | -999    |
| 24    | 54.92  | 8.30   | 2.11  | 1.69  | -999 | -999    |
| 24    | 54.92  | 8.30   | 1.54  | 2.44  | -999 | -999    |
| 24    | 54.92  | 8.30   | 2.60  | 1.85  | -999 | -999    |
| <hr/> |        |        |       |       |      |         |
| 25    | 20.42  | -18.00 | 1.76  | 1.35  | -999 | -999    |
| 25    | 20.00  | -18.01 | 14.67 | 4.36  | -999 | -999    |
| 25    | 20.27  | -17.22 | 4.58  | 5.16  | -999 | -999    |
| 25    | 18.00  | -17.50 | 3.52  | 2.73  | 1.95 | -999    |
| 25    | 18.00  | -16.56 | 2.19  | 2.22  | 1.57 | -999    |
| 25    | 18.05  | -16.27 | 2.23  | 2.01  | 1.35 | -999    |
| 25    | 18.52  | -16.99 | 2.47  | 2.00  | -999 | -999    |
| 25    | 18.50  | -17.27 | 2.27  | 1.74  | 1.11 | -999    |
| 25    | 18.50  | -17.48 | 1.73  | 1.37  | 0.94 | -999    |
| 25    | 18.57  | -17.50 | 1.34  | 1.73  | 1.25 | -999    |
| 25    | 18.82  | -17.50 | 1.91  | 2.14  | 0.94 | -999    |
| 25    | 18.93  | -18.08 | 2.01  | 1.94  | 1.28 | -999    |
| 25    | 18.76  | -18.25 | 2.02  | 1.82  | 1.59 | -999    |
| 25    | 18.57  | -18.43 | 1.86  | 1.95  | 1.90 | -999    |
| 25    | 18.37  | -18.64 | 2.01  | 1.74  | 1.91 | -999    |
| 25    | 18.04  | -18.96 | 1.89  | 1.56  | 1.97 | -999.00 |
| <hr/> |        |        |       |       |      |         |
| 26    | -60.21 | -56.14 | 2.10  | 2.90  | -999 | 9.00    |
| 26    | -61.13 | -55.51 | 5.90  | 1.10  | -999 | 9.00    |
| 26    | -61.09 | -55.57 | 1.30  | 0.40  | -999 | 9.00    |
| 26    | -63.81 | -54.15 | -999  | 1.20  | -999 | 9.00    |
| 26    | -62.58 | -54.23 | 2.20  | 2.30  | -999 | 9.00    |
| 26    | -61.26 | -54.17 | -999  | 3.20  | -999 | 9.00    |
| 26    | -61.14 | -54.21 | 1.90  | -999  | -999 | 9.00    |
| 26    | -62.29 | -55.56 | 3.50  | -999  | -999 | 9.00    |
| 26    | -62.36 | -56.01 | 4.10  | -999  | 3.20 | 9.00    |
| 26    | -62.42 | -56.01 | 6.80  | 3.10  | -999 | 9.00    |
| 26    | -61.44 | -57.54 | 6.20  | 3.00  | -999 | 9.00    |
| 26    | -61.29 | -58.05 | 6.50  | 5.00  | -999 | 9.00    |
| 26    | -61.15 | -58.16 | 2.20  | 4.70  | -999 | 9.00    |
| 26    | -61.24 | -58.08 | 10.60 | 1.90  | -999 | 9.00    |
| 26    | -61.36 | -58.00 | 3.50  | 7.20  | -999 | 9.00    |
| 26    | -63.00 | -56.58 | 22.70 | 1.50  | 1.50 | 9.00    |
| 26    | -61.45 | -57.51 | 5.20  | 18.60 | -999 | 9.00    |
| 26    | -61.43 | -57.53 | 37.40 | 4.50  | -999 | 9.00    |
| 26    | -60.20 | -58.52 | 7.80  | 7.00  | -999 | 9.00    |
| 26    | -60.59 | -58.27 | 3.80  | 8.60  | -999 | 9.00    |

|    |        |        |       |      |      |      |
|----|--------|--------|-------|------|------|------|
| 26 | -61.17 | -58.10 | 4.80  | 4.20 | -999 | 9.00 |
| 26 | -61.07 | -58.21 | 4.20  | 2.50 | -999 | 9.00 |
| 26 | -61.33 | -58.00 | 3.90  | 4.50 | -999 | 9.00 |
| 26 | -62.14 | -57.34 | 13.00 | 5.40 | -999 | 9.00 |
| 26 | -62.13 | -57.43 | 10.70 | 6.50 | -999 | 9.00 |
| 26 | -63.22 | -56.57 | 10.90 | 1.40 | -999 | 9.00 |
| 26 | -62.46 | -59.06 | 9.60  | 6.60 | -999 | 9.00 |
| 26 | -62.56 | -59.00 | 7.70  | 2.90 | -999 | 9.00 |
| 26 | -63.26 | -59.55 | 3.20  | 3.60 | -999 | 9.00 |
| 26 | -61.13 | -60.00 | -999  | 3.60 | -999 | 9.00 |
| 26 | -62.58 | -60.13 | 3.70  | 2.90 | -999 | 9.00 |
| 26 | -62.49 | -60.19 | 5.80  | 2.40 | -999 | 9.00 |
| 26 | -61.30 | -63.10 | -999  | 2.00 | -999 | 9.00 |
| 26 | -61.44 | -63.32 | 2.10  | 1.30 | -999 | 9.00 |
| 26 | -63.10 | -61.49 | 10.20 | 1.50 | -999 | 9.00 |
| 26 | -63.18 | -61.33 | 4.20  | 2.40 | 2.00 | 9.00 |
| 26 | -63.24 | -61.25 | 9.40  | 1.40 | -999 | 9.00 |
| 26 | -64.45 | -65.16 | 23.80 | 5.70 | -999 | 9.00 |
| 26 | -64.24 | -65.59 | 5.30  | 2.80 | -999 | 9.00 |
| 26 | -63.12 | -67.38 | 5.40  | 4.10 | -999 | 9.00 |
| 26 | -62.05 | -65.06 | 5.10  | -999 | 2.00 | 9.00 |
| 26 | -61.51 | -64.33 | -999  | 3.30 | -999 | 9.00 |
| 26 | -61.57 | -64.14 | 5.80  | 3.00 | 1.90 | 9.00 |
| 26 | -66.49 | -63.10 | 2.90  | 7.50 | -999 | 9.00 |
| 26 | -64.58 | -63.25 | 4.70  | 5.00 | 2.40 | 9.00 |
| 26 | -65.00 | -63.51 | 4.70  | 3.90 | -999 | 9.00 |
| 26 | -65.03 | -63.50 | 1.00  | 3.50 | -999 | 9.00 |
| 26 | -66.49 | -69.09 | 2.70  | 2.40 | 1.20 | 9.00 |
| 26 | -66.47 | -69.16 | -999  | 6.90 | 7.90 | 9.00 |
| 26 | -63.30 | -66.58 | -999  | 1.80 | -999 | 9.00 |
| 26 | -64.28 | -64.47 | 8.50  | 3.20 | 1.70 | 9.00 |
| 26 | -64.42 | -65.18 | -999  | 4.20 | 2.30 | 9.00 |
| 26 | -64.27 | -68.17 | 4.40  | 4.10 | 2.90 | 9.00 |
| 26 | -61.24 | -68.25 | -999  | 6.50 | 0.60 | 9.00 |
| 26 | -66.16 | -69.11 | 3.90  | 4.40 | -999 | 9.00 |
| 26 | -63.40 | -63.38 | 2.90  | 3.90 | 2.80 | 9.00 |
| 26 | -62.50 | -60.24 | -999  | 4.20 | 2.80 | 9.00 |
| 26 | 62.54  | -61.02 | -999  | -999 | 1.00 | 9.00 |
| 26 | -62.35 | -59.13 | 1.30  | 2.90 | -999 | 9.00 |
| 26 | -62.51 | -59.57 | 1.00  | 2.90 | -999 | 9.00 |
| 26 | -62.18 | -58.39 | 4.60  | 0.90 | -999 | 9.00 |
| 26 | -63.28 | -56.35 | 3.80  | 1.40 | 2.60 | 9.00 |
| 26 | -62.38 | -56.35 | 4.10  | 4.40 | -999 | 9.00 |
| 26 | -62.52 | -56.55 | 15.90 | 5.40 | 3.60 | 9.00 |
| 26 | -62.26 | -56.28 | 3.40  | 4.10 | 2.00 | 9.00 |
| 26 | -62.00 | -56.00 | -999  | 3.50 | -999 | 9.00 |
| 26 | -61.14 | -54.54 | 4.20  | 6.20 | 3.30 | 9.00 |

|    |        |        |      |      |      |      |
|----|--------|--------|------|------|------|------|
| 26 | -60.50 | -55.34 | 3.90 | 4.20 | 1.30 | 9.00 |
| 26 | -60.51 | -55.46 | 1.40 | 0.30 | -999 | 9.00 |
| 26 | -60.57 | -55.10 | 2.20 | 1.90 | 1.50 | 9.00 |
| 27 | 11.00  | -59.05 | -999 | 0.80 | 1.50 | -999 |
| 27 | 11.00  | -57.90 | -999 | 0.70 | 2.70 | -999 |
| 27 | 11.00  | -56.01 | -999 | 0.60 | 1.10 | -999 |
| 27 | 10.81  | -54.78 | -999 | 0.70 | 2.60 | -999 |
| 27 | 10.35  | -52.91 | -999 | 0.70 | 0.80 | -999 |
| 27 | 10.20  | -52.30 | -999 | 0.70 | 1.60 | -999 |
| 27 | 10.00  | -51.12 | -999 | 0.70 | 1.10 | -999 |
| 27 | 10.00  | -50.42 | -999 | 0.80 | 0.60 | -999 |
| 27 | 10.00  | -49.10 | -999 | 0.90 | 1.00 | -999 |
| 27 | 10.00  | -47.07 | -999 | 0.70 | 1.20 | -999 |
| 27 | 10.00  | -46.04 | -999 | 0.70 | 1.50 | -999 |
| 27 | 10.00  | -44.02 | -999 | 0.70 | 0.90 | -999 |
| 27 | 10.00  | -42.97 | -999 | 0.80 | 0.80 | -999 |
| 27 | 10.00  | -39.98 | -999 | 0.80 | 3.00 | -999 |
| 27 | 10.01  | -39.00 | -999 | 0.80 | 1.90 | -999 |
| 27 | 10.00  | -38.16 | -999 | 0.80 | 1.90 | -999 |
| 27 | 10.00  | -37.39 | -999 | 0.80 | 1.70 | -999 |
| 27 | 10.00  | -35.43 | -999 | 0.90 | 0.70 | -999 |
| 27 | 10.00  | -34.47 | -999 | 0.80 | 1.40 | -999 |
| 27 | 10.00  | -32.42 | -999 | 0.90 | 1.00 | -999 |
| 27 | 10.00  | -31.46 | -999 | 0.90 | 1.80 | -999 |
| 27 | 10.00  | -29.41 | -999 | 1.10 | 0.90 | -999 |
| 27 | 10.00  | -28.83 | -999 | 0.70 | 1.10 | -999 |
| 27 | 10.00  | -26.66 | -999 | 0.90 | 3.60 | -999 |
| 27 | 9.29   | -26.61 | -999 | 0.90 | 1.10 | -999 |
| 27 | 8.40   | -26.56 | -999 | 0.80 | 4.20 | -999 |
| 27 | 6.80   | -26.45 | -999 | 0.80 | 0.80 | -999 |
| 27 | 6.44   | -26.43 | -999 | 0.70 | 0.70 | -999 |
| 27 | 5.50   | -26.36 | -999 | 0.80 | 1.40 | -999 |
| 27 | 4.58   | -26.30 | -999 | 0.80 | 0.90 | -999 |
| 27 | 3.56   | -26.23 | -999 | 0.90 | 1.00 | -999 |
| 27 | 2.68   | -26.18 | -999 | 1.00 | 1.20 | -999 |
| 27 | 1.73   | -26.11 | -999 | 1.00 | 0.60 | -999 |
| 27 | 0.61   | -26.04 | -999 | 0.90 | 1.40 | -999 |
| 27 | 0.00   | -26.00 | -999 | 0.90 | 0.90 | -999 |
| 27 | 0.00   | -25.37 | -999 | 1.00 | 1.20 | -999 |
| 27 | 0.00   | -24.77 | -999 | 0.80 | 1.80 | -999 |
| 27 | 0.00   | -23.99 | -999 | 0.90 | 6.10 | -999 |
| 27 | 0.01   | -23.50 | -999 | 1.00 | 0.80 | -999 |
| 27 | 0.00   | -23.50 | -999 | 0.80 | 0.70 | -999 |
| 27 | 0.09   | -23.50 | -999 | 0.90 | 1.00 | -999 |
| 27 | 1.07   | -23.50 | -999 | 1.00 | 4.20 | -999 |
| 27 | -999   | -999   | -999 | 1.00 | 1.50 | -999 |
| 27 | -999   | -999   | -999 | 0.90 | 1.50 | -999 |

|    |       |        |       |      |      |      |
|----|-------|--------|-------|------|------|------|
| 27 | -999  | -999   | -999  | 0.90 | 2.40 | -999 |
| 27 | 4.43  | -23.87 | -999  | 0.80 | 0.80 | -999 |
| 27 | 5.35  | -24.04 | -999  | 0.90 | 3.00 | -999 |
| 27 | 6.50  | -24.25 | -999  | 0.80 | 1.20 | -999 |
| 27 | 7.33  | -24.41 | -999  | 0.80 | 1.00 | -999 |
| 27 | 8.42  | -24.61 | -999  | 0.80 | 0.60 | -999 |
| 27 | 8.91  | -24.70 | -999  | 0.90 | 0.90 | -999 |
| 27 | 9.72  | -24.85 | -999  | 1.10 | 1.70 | -999 |
| 27 | 10.00 | -24.91 | -999  | 1.50 | 1.40 | -999 |
| 27 | 10.52 | -24.93 | -999  | 1.40 | 1.40 | -999 |
| 27 | 10.84 | -23.99 | -999  | 1.80 | 2.10 | -999 |
| 27 | 11.00 | -23.32 | -999  | 1.30 | 1.20 | -999 |
| 27 | 11.00 | -22.48 | -999  | 1.60 | 1.80 | -999 |
| 27 | 11.00 | -21.67 | -999  | 1.40 | 1.70 | -999 |
| 27 | 11.00 | -20.88 | -999  | 1.50 | 2.50 | -999 |
| 27 | 11.03 | -20.23 | -999  | 1.50 | 3.20 | -999 |
| 27 | 11.32 | -19.32 | -999  | 1.40 | 2.50 | -999 |
| 27 | 11.52 | -18.68 | -999  | 1.30 | 1.00 | -999 |
| 27 | 11.77 | -18.02 | -999  | 1.50 | 3.40 | -999 |
| 27 | 11.65 | -17.50 | -999  | 1.40 | 1.10 | -999 |
| 27 | 10.51 | -16.97 | -999  | 1.10 | 1.20 | -999 |
| 27 | 10.93 | -17.54 | -999  | 1.20 | 2.40 | -999 |
| 27 | 11.03 | -17.76 | -999  | 1.00 | 1.10 | -999 |
| 27 | 11.02 | -18.31 | -999  | 1.50 | 1.70 | -999 |
| 27 | 11.00 | -18.83 | -999  | 1.10 | 0.80 | -999 |
| 27 | 11.00 | -19.65 | -999  | 1.80 | 1.10 | -999 |
| 27 | 11.00 | -19.75 | -999  | 1.60 | 1.90 | -999 |
| 27 | 11.04 | -19.99 | -999  | 1.20 | 1.00 | -999 |
| 27 | 11.00 | -20.42 | -999  | 1.20 | 1.70 | -999 |
| 27 | 10.78 | -19.86 | -999  | 1.50 | 1.30 | -999 |
| 27 | 10.10 | -19.47 | -999  | 3.70 | 1.50 | -999 |
| 27 | 9.31  | -19.00 | -999  | 2.60 | 1.80 | -999 |
| 27 | 8.97  | -18.82 | -999  | 1.10 | 1.40 | -999 |
| 27 | 7.58  | -17.67 | -999  | 0.90 | 0.70 | -999 |
| 27 | 6.38  | -16.34 | -999  | 0.90 | 8.10 | -999 |
| 27 | 4.40  | -11.16 | -999  | 0.90 | 0.60 | -999 |
| 27 | 3.73  | -9.31  | -999  | 0.90 | 0.60 | -999 |
| 27 | 3.53  | -4.97  | -999  | 1.00 | 1.10 | -999 |
| 27 | 3.57  | -3.01  | -999  | 1.00 | 3.60 | -999 |
| 28 | -0.90 | -89.62 | 2.42  | 1.68 | -999 | -999 |
| 28 | -0.90 | -89.62 | 1.43  | 1.39 | -999 | -999 |
| 28 | -0.90 | -89.62 | 4.02  | 2.06 | -999 | -999 |
| 28 | -0.90 | -89.62 | 27.62 | 4.52 | -999 | -999 |
| 28 | -0.90 | -89.62 | 12.28 | 2.83 | -999 | -999 |
| 28 | -0.90 | -89.62 | 10.43 | 2.40 | -999 | -999 |
| 28 | -0.90 | -89.62 | 16.20 | 3.99 | -999 | -999 |
| 28 | -0.90 | -89.62 | 43.57 | 7.55 | -999 | -999 |



|    |       |        |       |      |      |      |
|----|-------|--------|-------|------|------|------|
| 28 | -0.90 | -89.62 | 4.24  | 2.37 | -999 | -999 |
| 28 | -0.90 | -89.62 | 13.45 | 2.99 | -999 | -999 |
| 28 | -0.90 | -89.62 | 13.16 | 3.66 | -999 | -999 |
| 28 | -0.90 | -89.62 | 12.33 | 2.08 | -999 | -999 |
| 28 | -0.90 | -89.62 | 12.69 | 2.51 | -999 | -999 |
| 28 | -0.90 | -89.62 | 6.88  | 1.80 | -999 | -999 |
| 28 | -0.90 | -89.62 | 12.12 | 2.92 | -999 | -999 |
| 28 | -0.90 | -89.62 | 5.92  | 2.46 | -999 | -999 |
| 28 | -0.90 | -89.62 | 7.97  | 2.32 | -999 | -999 |
| 28 | -0.90 | -89.62 | -999  | -999 | 0.68 | -999 |
| 28 | -0.90 | -89.62 | -999  | -999 | 1.15 | -999 |
| 28 | -0.90 | -89.62 | -999  | -999 | 1.16 | -999 |
| 28 | -0.90 | -89.62 | -999  | -999 | 1.61 | -999 |
| 28 | -0.90 | -89.62 | -999  | -999 | 1.03 | -999 |
| 28 | -0.90 | -89.62 | -999  | -999 | 1.04 | -999 |
| 28 | -0.90 | -89.62 | -999  | -999 | 1.12 | -999 |
| 28 | -0.90 | -89.62 | -999  | -999 | 0.99 | -999 |
| 28 | -0.90 | -89.62 | -999  | -999 | 1.06 | -999 |
| 28 | -0.90 | -89.62 | -999  | -999 | 2.55 | -999 |
| 28 | -0.90 | -89.62 | -999  | -999 | 1.03 | -999 |
| 28 | -0.90 | -89.62 | -999  | -999 | 0.97 | -999 |
| 28 | -0.90 | -89.62 | -999  | -999 | 1.35 | -999 |
| 28 | -0.90 | -89.62 | -999  | -999 | 1.64 | -999 |
| 28 | -0.90 | -89.62 | -999  | -999 | 2.23 | -999 |
| 28 | -0.90 | -89.62 | -999  | -999 | 1.26 | -999 |
| 28 | -0.90 | -89.62 | -999  | -999 | 1.60 | -999 |
| 28 | -0.90 | -89.62 | -999  | -999 | 1.48 | -999 |
| 28 | -0.90 | -89.62 | -999  | -999 | 1.14 | -999 |
| 28 | -0.90 | -89.62 | -999  | -999 | 1.44 | -999 |
| 28 | -0.90 | -89.62 | -999  | -999 | 1.24 | -999 |
| 28 | -0.90 | -89.62 | -999  | -999 | 1.30 | -999 |
| 28 | -0.90 | -89.62 | -999  | -999 | 1.12 | -999 |
| 28 | -0.90 | -89.62 | -999  | -999 | 1.12 | -999 |
| 28 | -0.90 | -89.62 | -999  | -999 | 1.12 | -999 |
| 28 | -0.90 | -89.62 | -999  | -999 | 0.93 | -999 |
| 28 | -0.90 | -89.62 | -999  | -999 | 1.16 | -999 |
| 28 | -0.90 | -89.62 | -999  | -999 | 0.79 | -999 |
| 28 | -0.90 | -89.62 | -999  | -999 | 0.86 | -999 |
| 28 | -0.90 | -89.62 | -999  | -999 | 1.14 | -999 |
| 28 | -0.90 | -89.62 | -999  | -999 | 0.87 | -999 |
| 28 | -0.90 | -89.62 | -999  | -999 | 0.86 | -999 |
| 28 | -0.90 | -89.62 | -999  | -999 | 1.05 | -999 |
| 28 | -0.90 | -89.62 | -999  | -999 | 0.74 | -999 |
| 28 | -0.90 | -89.62 | -999  | -999 | 1.11 | -999 |
| 28 | -0.90 | -89.62 | -999  | -999 | 1.02 | -999 |
| 28 | -0.90 | -89.62 | -999  | -999 | 1.38 | -999 |
| 28 | -0.90 | -89.62 | -999  | -999 | 0.96 | -999 |

|       |       |         |       |      |      |      |
|-------|-------|---------|-------|------|------|------|
| 28    | -0.90 | -89.62  | -999  | -999 | 1.67 | -999 |
| 28    | -0.90 | -89.62  | -999  | -999 | 1.02 | -999 |
| 28    | -0.90 | -89.62  | -999  | -999 | 1.02 | -999 |
| 28    | -0.90 | -89.62  | -999  | -999 | 0.70 | -999 |
| 28    | -0.90 | -89.62  | -999  | -999 | 0.86 | -999 |
| 28    | -0.90 | -89.62  | -999  | -999 | 0.70 | -999 |
| 28    | -0.90 | -89.62  | -999  | -999 | 0.92 | -999 |
| 28    | -0.90 | -89.62  | -999  | -999 | 0.67 | -999 |
| 28    | -0.90 | -89.62  | -999  | -999 | 0.87 | -999 |
| 28    | -0.90 | -89.62  | -999  | -999 | 0.87 | -999 |
| 28    | -0.90 | -89.62  | -999  | -999 | 2.00 | -999 |
| 28    | -0.90 | -89.62  | -999  | -999 | 0.97 | -999 |
| 28    | -0.90 | -89.62  | -999  | -999 | 1.19 | -999 |
| <hr/> |       |         |       |      |      |      |
| 29    | 0.00  | 159.73  | 2.31  | 1.43 | -999 | -999 |
| 29    | 0.00  | 164.45  | 1.05  | 1.13 | -999 | -999 |
| 29    | 0.00  | 169.92  | 1.33  | 1.16 | -999 | -999 |
| 29    | 0.00  | 174.98  | 1.20  | 0.57 | -999 | -999 |
| 29    | 0.00  | 179.25  | 1.05  | 0.65 | -999 | -999 |
| 29    | 0.00  | -175.68 | 1.66  | 0.89 | -999 | -999 |
| 29    | 0.00  | -170.82 | 2.36  | 0.45 | -999 | -999 |
| 29    | 0.00  | -164.83 | 2.96  | 0.64 | -999 | -999 |
| 29    | 0.00  | -160.13 | 2.90  | 1.13 | -999 | -999 |
| 29    | 30.00 | 180.00  | 1.25  | 0.94 | -999 | -999 |
| <hr/> |       |         |       |      |      |      |
| 30    | -7.50 | 112.60  | 1.62  | 1.50 | -999 | -999 |
| 30    | -7.50 | 112.60  | 0.81  | 0.72 | -999 | -999 |
| 30    | -7.50 | 112.60  | 1.46  | 0.78 | -999 | -999 |
| 30    | -7.50 | 112.60  | 1.08  | 0.87 | -999 | -999 |
| 30    | -7.50 | 112.60  | 1.00  | 0.89 | -999 | -999 |
| 30    | -7.50 | 112.60  | 0.57  | 0.93 | -999 | -999 |
| 30    | -7.50 | 112.60  | 0.81  | 1.01 | -999 | -999 |
| 30    | -7.50 | 112.60  | 0.73  | 0.97 | -999 | -999 |
| 30    | -7.50 | 112.60  | 0.37  | 0.60 | -999 | -999 |
| 30    | -7.50 | 112.60  | 0.52  | 0.56 | -999 | -999 |
| 30    | -7.50 | 112.60  | 0.74  | 0.87 | -999 | -999 |
| 30    | -7.50 | 112.60  | 0.59  | 0.68 | -999 | -999 |
| <hr/> |       |         |       |      |      |      |
| 31    | 1.91  | -157.49 | 1.12  | 1.75 | -999 | -999 |
| 31    | 1.91  | -157.49 | 16.27 | 2.28 | -999 | -999 |
| 31    | 1.91  | -157.49 | 7.46  | 1.79 | -999 | -999 |
| 31    | 1.91  | -157.49 | 2.88  | 1.53 | -999 | -999 |
| 31    | 1.91  | -157.49 | 22.50 | 3.01 | -999 | -999 |
| 31    | 1.91  | -157.49 | 31.38 | 3.71 | -999 | -999 |
| 31    | 1.91  | -157.49 | 8.26  | 2.20 | -999 | -999 |
| 31    | 1.91  | -157.49 | 8.46  | 2.19 | -999 | -999 |
| 31    | 1.91  | -157.49 | 25.48 | 3.58 | -999 | -999 |
| 31    | 1.91  | -157.49 | 10.24 | 2.65 | -999 | -999 |
| 31    | 1.91  | -157.49 | 20.50 | 3.28 | -999 | -999 |
| <hr/> |       |         |       |      |      |      |
| 32    | 0.00  | -160.01 | 2.60  | 1.35 | -999 | -999 |

|    |        |         |       |      |      |      |
|----|--------|---------|-------|------|------|------|
| 32 | 0.00   | -163.24 | 2.72  | 1.69 | -999 | -999 |
| 32 | 0.00   | -169.30 | 3.52  | 1.53 | -999 | -999 |
| 32 | 0.00   | -179.17 | 2.96  | 1.99 | -999 | -999 |
| 32 | 0.00   | 174.97  | 2.47  | 1.92 | -999 | -999 |
| 32 | 0.00   | 166.19  | 0.82  | 1.25 | -999 | -999 |
| 32 | 0.00   | 161.48  | 0.86  | 2.00 | -999 | -999 |
| 32 | -0.01  | 155.86  | 0.91  | 2.04 | -999 | -999 |
| 32 | 0.00   | 149.79  | 1.02  | 1.19 | -999 | -999 |
| 32 | 0.00   | 145.00  | 1.47  | 1.38 | -999 | -999 |
| 33 | 45.10  | 141.20  | 1.34  | 0.92 | -999 | -999 |
| 33 | 45.10  | 141.20  | 1.27  | 0.87 | -999 | -999 |
| 33 | 45.10  | 141.20  | 1.75  | 0.97 | -999 | -999 |
| 33 | 45.10  | 141.20  | 2.55  | 1.15 | -999 | -999 |
| 33 | 45.10  | 141.20  | 1.11  | 0.80 | -999 | -999 |
| 33 | 45.10  | 141.20  | 1.17  | 0.87 | -999 | -999 |
| 33 | 45.10  | 141.20  | 1.03  | 0.77 | -999 | -999 |
| 33 | 45.10  | 141.20  | 1.45  | 0.95 | -999 | -999 |
| 33 | 45.10  | 141.20  | 1.28  | 0.82 | -999 | -999 |
| 33 | 45.10  | 141.20  | 2.15  | 0.97 | -999 | -999 |
| 33 | 45.10  | 141.20  | 1.63  | 0.83 | -999 | -999 |
| 33 | 45.10  | 141.20  | 1.47  | 0.91 | -999 | -999 |
| 33 | 45.10  | 141.20  | 1.34  | 0.86 | -999 | -999 |
| 33 | 45.10  | 141.20  | 9.26  | 1.63 | -999 | -999 |
| 33 | 45.10  | 141.20  | 2.31  | 1.11 | -999 | -999 |
| 33 | 45.10  | 141.20  | 4.08  | 0.99 | -999 | -999 |
| 33 | 45.10  | 141.20  | 2.07  | 1.06 | -999 | -999 |
| 33 | 45.10  | 141.20  | 4.93  | 1.71 | -999 | -999 |
| 33 | 45.10  | 141.20  | 2.77  | 1.11 | -999 | -999 |
| 33 | 45.10  | 141.20  | 9.75  | 1.61 | -999 | -999 |
| 33 | 45.10  | 141.20  | 9.94  | 1.63 | -999 | -999 |
| 33 | 45.10  | 141.20  | 1.46  | 0.99 | -999 | -999 |
| 33 | 45.10  | 141.20  | 2.49  | 1.11 | -999 | -999 |
| 33 | 45.10  | 141.20  | 1.60  | 1.00 | -999 | -999 |
| 33 | 45.10  | 141.20  | 1.61  | 0.98 | -999 | -999 |
| 33 | 45.10  | 141.20  | 1.64  | 0.92 | -999 | -999 |
| 33 | 45.10  | 141.20  | 1.60  | 0.96 | -999 | -999 |
| 33 | 45.10  | 141.20  | 13.29 | 1.90 | -999 | -999 |
| 33 | 45.10  | 141.20  | 6.66  | 1.46 | -999 | -999 |
| 33 | 45.10  | 141.20  | 1.68  | 0.87 | -999 | -999 |
| 34 | -68.50 | 41.30   | -999  | -999 | 0.12 | -999 |
| 34 | -68.50 | 41.30   | -999  | -999 | 0.14 | -999 |
| 34 | -68.50 | 41.30   | -999  | -999 | 0.15 | -999 |
| 34 | -68.50 | 41.30   | -999  | -999 | 0.24 | -999 |
| 34 | -68.50 | 41.30   | -999  | -999 | 0.23 | -999 |
| 34 | -68.50 | 41.30   | -999  | -999 | 0.23 | -999 |
| 34 | -68.50 | 41.30   | -999  | -999 | 0.22 | -999 |
| 34 | -68.50 | 41.30   | -999  | -999 | 0.25 | -999 |

|    |        |       |      |      |      |      |
|----|--------|-------|------|------|------|------|
| 34 | -68.50 | 41.30 | -999 | -999 | 0.32 | -999 |
| 34 | -68.50 | 41.30 | -999 | -999 | 0.35 | -999 |
| 34 | -68.50 | 41.30 | -999 | -999 | 0.35 | -999 |
| 34 | -68.50 | 41.30 | -999 | -999 | 0.38 | -999 |
| 34 | -68.50 | 41.30 | -999 | -999 | 0.46 | -999 |
| 34 | -68.50 | 41.30 | -999 | -999 | 0.38 | -999 |
| 34 | -68.50 | 41.30 | -999 | -999 | 0.46 | -999 |
| 34 | -68.50 | 41.30 | -999 | -999 | 0.52 | -999 |
| 34 | -68.50 | 41.30 | -999 | -999 | 0.48 | -999 |
| 34 | -68.50 | 41.30 | -999 | -999 | 0.45 | -999 |
| 34 | -68.50 | 41.30 | -999 | -999 | 0.53 | -999 |
| 34 | -68.50 | 41.30 | -999 | -999 | 0.44 | -999 |
| 34 | -68.50 | 41.30 | -999 | -999 | 0.47 | -999 |
| 34 | -68.50 | 41.30 | -999 | -999 | 0.48 | -999 |
| 34 | -68.50 | 41.30 | -999 | -999 | 0.43 | -999 |
| 34 | -68.50 | 41.30 | -999 | -999 | 0.41 | -999 |
| 34 | -68.50 | 41.30 | -999 | -999 | 0.40 | -999 |
| 34 | -68.50 | 41.30 | -999 | -999 | 0.47 | -999 |
| 34 | -68.50 | 41.30 | -999 | -999 | 0.38 | -999 |
| 34 | -68.50 | 41.30 | -999 | -999 | 0.36 | -999 |
| 34 | -68.50 | 41.30 | -999 | -999 | 0.33 | -999 |
| 34 | -68.50 | 41.30 | -999 | -999 | 0.32 | -999 |
| 34 | -68.50 | 41.30 | -999 | -999 | 0.31 | -999 |
| 34 | -68.50 | 41.30 | -999 | -999 | 0.29 | -999 |
| 34 | -68.50 | 41.30 | -999 | -999 | 0.32 | -999 |
| 34 | -68.50 | 41.30 | -999 | -999 | 0.25 | -999 |
| 34 | -68.50 | 41.30 | -999 | -999 | 0.20 | -999 |
| 34 | -68.50 | 41.30 | -999 | -999 | 0.20 | -999 |
| 34 | -68.50 | 41.30 | -999 | -999 | 0.15 | -999 |
| 34 | -68.50 | 41.30 | -999 | -999 | 0.12 | -999 |
| 34 | -68.50 | 41.30 | -999 | -999 | 0.13 | -999 |
| 34 | -68.50 | 41.30 | -999 | -999 | 0.12 | -999 |
| 34 | -68.50 | 41.30 | -999 | -999 | 0.08 | -999 |
| 34 | -68.50 | 41.30 | -999 | -999 | 0.01 | -999 |
| 34 | -68.50 | 41.30 | -999 | -999 | 0.07 | -999 |
| 34 | -68.50 | 41.30 | -999 | -999 | 0.07 | -999 |
| 34 | -68.50 | 41.30 | -999 | -999 | 0.02 | -999 |
| 34 | -68.50 | 41.30 | -999 | -999 | 0.05 | -999 |
| 34 | -68.50 | 41.30 | -999 | -999 | 0.04 | -999 |
| 34 | -68.50 | 41.30 | -999 | -999 | 0.05 | -999 |
| 34 | -68.50 | 41.30 | -999 | -999 | 0.12 | -999 |
| 34 | -68.50 | 41.30 | -999 | -999 | 0.04 | -999 |
| 34 | -68.50 | 41.30 | -999 | -999 | 0.04 | -999 |
| 34 | -68.50 | 41.30 | -999 | -999 | 0.11 | -999 |
| 34 | -68.50 | 41.30 | -999 | -999 | 0.09 | -999 |
| 34 | -68.50 | 41.30 | -999 | -999 | 0.08 | -999 |
| 34 | -68.50 | 41.30 | -999 | -999 | 0.07 | -999 |

|    |        |        |      |      |      |      |
|----|--------|--------|------|------|------|------|
| 34 | -68.50 | 41.30  | -999 | -999 | 0.06 | -999 |
| 34 | -68.50 | 41.30  | -999 | -999 | 0.12 | -999 |
| 34 | -68.50 | 41.30  | -999 | -999 | 0.07 | -999 |
| 34 | -68.50 | 41.30  | -999 | -999 | 0.09 | -999 |
| 34 | -68.50 | 41.30  | -999 | -999 | 0.23 | -999 |
| 35 | 82.50  | -62.50 | 2.75 | 1.00 | 0.38 | -999 |
| 35 | 82.50  | -62.50 | 3.68 | 0.86 | 0.36 | -999 |
| 35 | 82.50  | -62.50 | 6.24 | 1.34 | 0.37 | -999 |
| 35 | 82.50  | -62.50 | 3.72 | 1.21 | 0.23 | -999 |
| 35 | 82.50  | -62.50 | 1.64 | 1.30 | 0.18 | -999 |
| 35 | 82.50  | -62.50 | 1.51 | 1.26 | 0.18 | -999 |
| 35 | 82.50  | -62.50 | 1.82 | 1.31 | 0.06 | -999 |
| 35 | 82.50  | -62.50 | 3.03 | 1.27 | 0.15 | -999 |
| 35 | 82.50  | -62.50 | 2.22 | 1.36 | 0.08 | -999 |
| 35 | 82.50  | -62.50 | 0.77 | 1.01 | 0.11 | -999 |
| 35 | 82.50  | -62.50 | 0.64 | 0.98 | 0.12 | -999 |
| 35 | 82.50  | -62.50 | 0.37 | 0.74 | 0.13 | -999 |
| 35 | 82.50  | -62.50 | 0.33 | 0.73 | 0.04 | -999 |
| 35 | 82.50  | -62.50 | 1.57 | 0.95 | 0.13 | -999 |
| 35 | 82.50  | -62.50 | 2.02 | 0.98 | 0.10 | -999 |
| 35 | 82.50  | -62.50 | 1.57 | 0.95 | 0.08 | -999 |
| 35 | 82.50  | -62.50 | 2.09 | 0.79 | 0.35 | -999 |
| 35 | 82.50  | -62.50 | 1.82 | 0.75 | 0.15 | -999 |
| 35 | 82.50  | -62.50 | 2.40 | 0.92 | 0.28 | -999 |
| 35 | 82.50  | -62.50 | 0.14 | 0.99 | 0.38 | -999 |
| 35 | 82.50  | -62.50 | 1.67 | 0.99 | 0.40 | -999 |
| 35 | 82.50  | -62.50 | 1.96 | 0.98 | 0.40 | -999 |
| 35 | 82.50  | -62.50 | 1.80 | 1.01 | 0.45 | -999 |
| 35 | 82.50  | -62.50 | 1.35 | 1.01 | 0.41 | -999 |
| 35 | 82.50  | -62.50 | -999 | -999 | 0.40 | -999 |
| 35 | 82.50  | -62.50 | -999 | -999 | 0.26 | -999 |
| 35 | 82.50  | -62.50 | -999 | -999 | 0.27 | -999 |
| 35 | 82.50  | -62.50 | -999 | -999 | 0.13 | -999 |
| 35 | 82.50  | -62.50 | -999 | -999 | 0.19 | -999 |
| 35 | 82.50  | -62.50 | -999 | -999 | 0.14 | -999 |
| 35 | 82.50  | -62.50 | -999 | -999 | 0.12 | -999 |
| 35 | 82.50  | -62.50 | -999 | -999 | 0.12 | -999 |
| 35 | 82.50  | -62.50 | -999 | -999 | 0.05 | -999 |
| 35 | 82.50  | -62.50 | -999 | -999 | 0.12 | -999 |
| 35 | 82.50  | -62.50 | -999 | -999 | 0.17 | -999 |
| 35 | 82.50  | -62.50 | -999 | -999 | 0.12 | -999 |
| 35 | 82.50  | -62.50 | -999 | -999 | 0.06 | -999 |
| 35 | 82.50  | -62.50 | -999 | -999 | 0.12 | -999 |
| 35 | 82.50  | -62.50 | -999 | -999 | 0.20 | -999 |
| 35 | 82.50  | -62.50 | -999 | -999 | 0.27 | -999 |
| 35 | 82.50  | -62.50 | -999 | -999 | 0.36 | -999 |
| 35 | 82.50  | -62.50 | -999 | -999 | 0.51 | -999 |

|    |       |        |       |      |      |      |
|----|-------|--------|-------|------|------|------|
| 35 | 82.50 | -62.50 | -999  | -999 | 0.53 | -999 |
| 35 | 82.50 | -62.50 | -999  | -999 | 0.46 | -999 |
| 35 | 82.50 | -62.50 | -999  | -999 | 0.44 | -999 |
| 35 | 82.50 | -62.50 | -999  | -999 | 0.37 | -999 |
| 35 | 82.50 | -62.50 | -999  | -999 | 0.26 | -999 |
| 35 | 82.50 | -62.50 | -999  | -999 | 0.21 | -999 |
| 35 | 82.50 | -62.50 | -999  | -999 | 0.28 | -999 |
| 35 | 82.50 | -62.50 | -999  | -999 | 0.13 | -999 |
| 35 | 82.50 | -62.50 | -999  | -999 | 0.10 | -999 |
| 35 | 82.50 | -62.50 | -999  | -999 | 0.13 | -999 |
| 35 | 82.50 | -62.50 | -999  | -999 | 0.13 | -999 |
| 35 | 82.50 | -62.50 | -999  | -999 | 0.18 | -999 |
| 35 | 82.50 | -62.50 | -999  | -999 | 0.11 | -999 |
| 35 | 82.50 | -62.50 | -999  | -999 | 0.37 | -999 |
| 35 | 82.50 | -62.50 | -999  | -999 | 0.10 | -999 |
| 35 | 82.50 | -62.50 | -999  | -999 | 0.09 | -999 |
| 35 | 82.50 | -62.50 | -999  | -999 | 0.21 | -999 |
| 35 | 82.50 | -62.50 | -999  | -999 | 0.19 | -999 |
| 35 | 82.50 | -62.50 | -999  | -999 | 0.28 | -999 |
| 35 | 82.50 | -62.50 | -999  | -999 | 0.29 | -999 |
| 35 | 82.50 | -62.50 | -999  | -999 | 0.43 | -999 |
| 35 | 82.50 | -62.50 | -999  | -999 | 0.35 | -999 |
| 35 | 82.50 | -62.50 | -999  | -999 | 0.45 | -999 |
| 35 | 82.50 | -62.50 | -999  | -999 | 0.49 | -999 |
| 36 | 43.20 | 145.50 | 2.19  | 0.83 | 0.31 | -999 |
| 36 | 43.20 | 145.50 | 2.18  | 0.96 | 0.38 | -999 |
| 36 | 43.20 | 145.50 | 1.95  | 0.97 | 0.26 | -999 |
| 36 | 43.20 | 145.50 | 2.14  | 0.87 | 0.31 | -999 |
| 36 | 43.20 | 145.50 | 1.78  | 1.08 | 0.24 | -999 |
| 36 | 43.20 | 145.50 | 1.36  | 0.97 | 0.20 | -999 |
| 36 | 43.20 | 145.50 | 2.80  | 1.51 | 0.37 | -999 |
| 36 | 43.20 | 145.50 | 4.09  | 2.03 | 0.81 | -999 |
| 36 | 43.20 | 145.50 | 3.23  | 1.55 | 1.30 | -999 |
| 36 | 43.20 | 145.50 | 3.41  | 1.50 | 0.92 | -999 |
| 36 | 43.20 | 145.50 | 4.62  | 1.93 | 1.91 | -999 |
| 36 | 43.20 | 145.50 | 7.02  | 2.76 | 2.40 | -999 |
| 36 | 43.20 | 145.50 | 3.63  | 1.11 | 0.77 | -999 |
| 36 | 43.20 | 145.50 | 2.21  | 0.84 | 0.51 | -999 |
| 36 | 43.20 | 145.50 | 1.57  | 1.04 | 0.94 | -999 |
| 36 | 43.20 | 145.50 | 2.78  | 1.24 | 1.23 | -999 |
| 36 | 43.20 | 145.50 | 10.28 | 2.43 | 1.79 | -999 |
| 36 | 43.20 | 145.50 | 8.80  | 2.13 | 1.79 | -999 |
| 36 | 43.20 | 145.50 | 3.93  | 1.25 | 0.94 | -999 |
| 36 | 43.20 | 145.50 | 2.34  | 0.99 | 1.14 | -999 |
| 36 | 43.20 | 145.50 | 3.73  | 1.07 | 0.99 | -999 |
| 36 | 43.20 | 145.50 | 3.66  | 1.13 | 0.42 | -999 |
| 36 | 43.20 | 145.50 | 1.78  | 1.29 | -999 | -999 |

|    |       |        |      |      |      |      |
|----|-------|--------|------|------|------|------|
| 36 | 43.20 | 145.50 | 2.02 | 1.27 | 0.62 | -999 |
| 36 | 43.20 | 145.50 | -999 | -999 | 0.37 | -999 |
| 36 | 43.20 | 145.50 | -999 | -999 | 0.37 | -999 |
| 36 | 43.20 | 145.50 | -999 | -999 | 0.31 | -999 |
| 36 | 43.20 | 145.50 | -999 | -999 | 0.48 | -999 |
| 36 | 43.20 | 145.50 | -999 | -999 | 0.37 | -999 |
| 36 | 43.20 | 145.50 | -999 | -999 | 0.39 | -999 |
| 36 | 43.20 | 145.50 | -999 | -999 | 0.21 | -999 |
| 36 | 43.20 | 145.50 | -999 | -999 | 1.71 | -999 |
| 36 | 43.20 | 145.50 | -999 | -999 | 0.48 | -999 |
| 36 | 43.20 | 145.50 | -999 | -999 | 0.86 | -999 |
| 36 | 43.20 | 145.50 | -999 | -999 | 1.42 | -999 |
| 36 | 43.20 | 145.50 | -999 | -999 | 0.87 | -999 |
| 36 | 43.20 | 145.50 | -999 | -999 | 0.79 | -999 |
| 36 | 43.20 | 145.50 | -999 | -999 | 0.72 | -999 |
| 36 | 43.20 | 145.50 | -999 | -999 | 3.66 | -999 |
| 36 | 43.20 | 145.50 | -999 | -999 | 1.88 | -999 |
| 36 | 43.20 | 145.50 | -999 | -999 | 0.96 | -999 |
| 36 | 43.20 | 145.50 | -999 | -999 | 1.75 | -999 |
| 36 | 43.20 | 145.50 | -999 | -999 | 0.53 | -999 |
| 36 | 43.20 | 145.50 | -999 | -999 | 0.61 | -999 |
| 36 | 43.20 | 145.50 | -999 | -999 | 0.45 | -999 |
| 36 | 43.20 | 145.50 | -999 | -999 | 0.57 | -999 |
| 36 | 43.20 | 145.50 | -999 | -999 | 0.53 | -999 |
| 36 | 43.20 | 145.50 | -999 | -999 | 0.48 | -999 |
| 36 | 43.20 | 145.50 | -999 | -999 | 0.56 | -999 |
| 36 | 43.20 | 145.50 | -999 | -999 | 0.42 | -999 |
| 36 | 43.20 | 145.50 | -999 | -999 | 0.33 | -999 |
| 36 | 43.20 | 145.50 | -999 | -999 | 0.58 | -999 |
| 36 | 43.20 | 145.50 | -999 | -999 | 0.96 | -999 |
| 36 | 43.20 | 145.50 | -999 | -999 | 0.40 | -999 |
| 36 | 43.20 | 145.50 | -999 | -999 | 0.67 | -999 |
| 36 | 43.20 | 145.50 | -999 | -999 | 0.45 | -999 |
| 36 | 43.20 | 145.50 | -999 | -999 | 1.92 | -999 |
| 36 | 43.20 | 145.50 | -999 | -999 | 2.69 | -999 |
| 36 | 43.20 | 145.50 | -999 | -999 | 2.02 | -999 |
| 36 | 43.20 | 145.50 | -999 | -999 | 1.49 | -999 |
| 36 | 43.20 | 145.50 | -999 | -999 | 1.72 | -999 |
| 36 | 43.20 | 145.50 | -999 | -999 | 1.10 | -999 |
| 36 | 43.20 | 145.50 | -999 | -999 | 2.37 | -999 |
| 36 | 43.20 | 145.50 | -999 | -999 | 0.72 | -999 |
| 36 | 43.20 | 145.50 | -999 | -999 | 1.14 | -999 |
| 36 | 43.20 | 145.50 | -999 | -999 | 1.05 | -999 |
| 36 | 43.20 | 145.50 | -999 | -999 | 0.61 | -999 |
| 36 | 43.20 | 145.50 | -999 | -999 | 4.47 | -999 |
| 36 | 43.20 | 145.50 | -999 | -999 | 0.46 | -999 |
| 36 | 43.20 | 145.50 | -999 | -999 | 0.46 | -999 |

---

|    |        |        |      |      |      |      |
|----|--------|--------|------|------|------|------|
| 37 | 25.50  | 140.33 | 1.43 | 1.31 | -999 | -999 |
| 37 | 21.77  | 141.60 | 0.81 | 0.92 | -999 | -999 |
| 37 | 14.22  | 144.08 | 0.52 | 0.63 | -999 | -999 |
| 37 | 7.11   | 147.63 | 1.23 | 1.02 | -999 | -999 |
| 37 | 0.75   | 150.97 | 0.45 | 0.62 | -999 | -999 |
| 37 | -6.68  | 153.77 | 0.67 | 0.75 | -999 | -999 |
| 37 | -14.48 | 154.52 | 1.28 | 1.14 | -999 | -999 |
| 37 | -22.37 | 153.98 | 0.41 | 0.56 | -999 | -999 |
| 38 | 29.23  | 139.00 | 2.13 | 1.35 | -999 | -999 |
| 38 | 21.57  | 141.68 | 1.20 | 1.32 | -999 | -999 |
| 38 | 14.25  | 144.01 | 0.61 | 0.87 | -999 | -999 |
| 38 | 7.58   | 147.40 | 1.45 | 1.13 | -999 | -999 |
| 38 | 0.65   | 151.00 | 0.75 | 1.01 | -999 | -999 |
| 38 | -6.77  | 153.78 | 1.25 | 1.26 | -999 | -999 |
| 38 | -7.22  | 154.33 | 1.18 | 1.25 | -999 | -999 |
| 38 | -8.87  | 154.49 | 1.83 | 1.18 | -999 | -999 |
| 39 | 29.40  | 138.95 | 2.53 | 1.44 | -999 | -999 |
| 39 | 22.07  | 141.48 | 0.40 | 0.93 | -999 | -999 |
| 39 | 14.72  | 143.93 | 1.08 | 1.10 | -999 | -999 |
| 39 | 7.85   | 147.25 | 1.68 | 1.26 | -999 | -999 |
| 39 | 1.07   | 150.67 | 1.85 | 1.28 | -999 | -999 |
| 39 | -5.77  | 153.57 | 1.46 | 1.24 | -999 | -999 |
| 39 | -6.53  | 153.55 | 1.80 | 1.47 | -999 | -999 |
| 39 | -13.77 | 154.57 | 1.49 | 1.17 | -999 | -999 |
| 40 | 29.77  | 138.82 | 0.74 | 0.63 | -999 | -999 |
| 40 | 22.17  | 141.47 | 0.38 | 0.51 | -999 | -999 |
| 40 | 14.90  | 143.87 | 0.05 | 0.52 | -999 | -999 |
| 40 | 7.73   | 147.32 | 0.64 | 0.56 | -999 | -999 |
| 40 | 0.72   | 150.98 | 1.26 | 0.70 | -999 | -999 |
| 40 | -6.95  | 153.82 | 1.29 | 0.75 | -999 | -999 |
| 40 | -14.55 | 154.55 | 1.55 | 0.98 | -999 | -999 |
| 40 | -22.27 | 153.93 | 2.26 | 0.93 | -999 | -999 |
| 41 | 29.97  | 138.93 | 0.30 | 0.65 | -999 | -999 |
| 41 | 22.68  | 141.82 | 0.20 | 0.59 | -999 | -999 |
| 41 | 16.55  | 146.18 | 1.03 | 0.96 | -999 | -999 |
| 41 | 9.33   | 147.35 | 1.25 | 1.10 | -999 | -999 |
| 41 | 2.03   | 150.60 | 1.14 | 1.30 | -999 | -999 |
| 41 | -5.12  | 153.43 | 1.09 | 1.38 | -999 | -999 |
| 41 | -12.08 | 154.70 | 0.66 | 1.12 | -999 | -999 |
| 41 | -19.53 | 154.17 | 1.29 | 1.01 | -999 | -999 |
| 42 | 30.15  | 140.32 | 2.52 | 0.97 | -999 | -999 |
| 42 | 24.43  | 145.70 | 1.00 | 0.77 | -999 | -999 |
| 42 | 17.30  | 146.90 | 0.72 | 0.98 | -999 | -999 |
| 42 | 9.83   | 147.71 | 0.96 | 0.88 | -999 | -999 |
| 42 | 2.57   | 150.25 | 0.91 | 0.85 | -999 | -999 |
| 42 | -4.32  | 153.27 | 0.93 | 0.83 | -999 | -999 |



|       |        |        |      |      |      |      |
|-------|--------|--------|------|------|------|------|
| 43    | 28.88  | 139.38 | 1.41 | 1.30 | -999 | -999 |
| 43    | 22.27  | 141.95 | 1.17 | 1.08 | -999 | -999 |
| 43    | 15.37  | 144.50 | 0.17 | 0.95 | -999 | -999 |
| 43    | 9.17   | 147.68 | 0.96 | 0.92 | -999 | -999 |
| 43    | -4.50  | 153.32 | 0.71 | 0.87 | -999 | -999 |
| 43    | -11.83 | 154.48 | 0.80 | 0.91 | -999 | -999 |
| 43    | -19.48 | 154.01 | 0.86 | 0.80 | -999 | -999 |
| <hr/> |        |        |      |      |      |      |
| 44    | -40.68 | 144.69 | 2.64 | 0.79 | 0.51 | -999 |
| 44    | -40.68 | 144.69 | 4.19 | 1.08 | 0.93 | -999 |
| 44    | -40.68 | 144.69 | 3.16 | 0.84 | 0.61 | -999 |
| 44    | -40.68 | 144.69 | 3.15 | 0.71 | 0.74 | -999 |
| 44    | -40.68 | 144.69 | 2.79 | 1.45 | 0.86 | -999 |
| 44    | -40.68 | 144.69 | 3.99 | 1.21 | 0.68 | -999 |
| 44    | -40.68 | 144.69 | 5.43 | 1.66 | 0.63 | -999 |
| 44    | -40.68 | 144.69 | 2.73 | 1.23 | 0.40 | -999 |
| 44    | -40.68 | 144.69 | 2.49 | 1.18 | 0.48 | -999 |
| 44    | -40.68 | 144.69 | 2.15 | 1.12 | 0.41 | -999 |
| 44    | -40.68 | 144.69 | 3.86 | 1.52 | 0.69 | -999 |
| 44    | -40.68 | 144.69 | 3.84 | 1.24 | 0.60 | -999 |
| 44    | -40.68 | 144.69 | 2.74 | 0.97 | 0.47 | -999 |
| 44    | -40.68 | 144.69 | 2.16 | 0.81 | 0.34 | -999 |
| 44    | -40.68 | 144.69 | 1.99 | 1.11 | 0.48 | -999 |
| 44    | -40.68 | 144.69 | 1.70 | 1.10 | 0.37 | -999 |
| 44    | -40.68 | 144.69 | 1.31 | 1.05 | 0.31 | -999 |
| 44    | -40.68 | 144.69 | 2.12 | 1.00 | 0.29 | -999 |
| 44    | -40.68 | 144.69 | 1.55 | 1.01 | 0.27 | -999 |
| 44    | -40.68 | 144.69 | 2.06 | 0.90 | 0.20 | -999 |
| 44    | -40.68 | 144.69 | 3.25 | 1.09 | 0.14 | -999 |
| 44    | -40.68 | 144.69 | 3.96 | 1.12 | 0.25 | -999 |
| 44    | -40.68 | 144.69 | 6.39 | 1.44 | 0.65 | -999 |
| 44    | -40.68 | 144.69 | 2.19 | 1.08 | 0.41 | -999 |
| 44    | -40.68 | 144.69 | 1.75 | 0.99 | 0.33 | -999 |
| 44    | -40.68 | 144.69 | 1.74 | 1.02 | 0.55 | -999 |
| 44    | -40.68 | 144.69 | -999 | -999 | 0.37 | -999 |
| 44    | -40.68 | 144.69 | -999 | -999 | 0.75 | -999 |
| 44    | -40.68 | 144.69 | -999 | -999 | 0.61 | -999 |
| 44    | -40.68 | 144.69 | -999 | -999 | 0.36 | -999 |
| 44    | -40.68 | 144.69 | -999 | -999 | 0.93 | -999 |
| 44    | -40.68 | 144.69 | -999 | -999 | 0.69 | -999 |
| 44    | -40.68 | 144.69 | -999 | -999 | 0.52 | -999 |
| 44    | -40.68 | 144.69 | -999 | -999 | 0.74 | -999 |
| 44    | -40.68 | 144.69 | -999 | -999 | 0.50 | -999 |
| 44    | -40.68 | 144.69 | -999 | -999 | 0.64 | -999 |
| 44    | -40.68 | 144.69 | -999 | -999 | 0.58 | -999 |
| 44    | -40.68 | 144.69 | -999 | -999 | 0.46 | -999 |
| 44    | -40.68 | 144.69 | -999 | -999 | 0.36 | -999 |
| 44    | -40.68 | 144.69 | -999 | -999 | 0.22 | -999 |

|    |        |        |      |      |      |      |
|----|--------|--------|------|------|------|------|
| 44 | -40.68 | 144.69 | -999 | -999 | 0.51 | -999 |
| 44 | -40.68 | 144.69 | -999 | -999 | 0.47 | -999 |
| 44 | -40.68 | 144.69 | -999 | -999 | 0.57 | -999 |
| 44 | -40.68 | 144.69 | -999 | -999 | 0.30 | -999 |
| 44 | -40.68 | 144.69 | -999 | -999 | 0.42 | -999 |
| 44 | -40.68 | 144.69 | -999 | -999 | 0.34 | -999 |
| 44 | -40.68 | 144.69 | -999 | -999 | 0.28 | -999 |
| 44 | -40.68 | 144.69 | -999 | -999 | 0.51 | -999 |
| 44 | -40.68 | 144.69 | -999 | -999 | 0.55 | -999 |
| 44 | -40.68 | 144.69 | -999 | -999 | 0.83 | -999 |
| 44 | -40.68 | 144.69 | -999 | -999 | 0.78 | -999 |
| 44 | -40.68 | 144.69 | -999 | -999 | 0.60 | -999 |
| 44 | -40.68 | 144.69 | -999 | -999 | 0.56 | -999 |
| 44 | -40.68 | 144.69 | -999 | -999 | 0.83 | -999 |
| 44 | -40.68 | 144.69 | -999 | -999 | 0.97 | -999 |
| 44 | -40.68 | 144.69 | -999 | -999 | 0.77 | -999 |
| 44 | -40.68 | 144.69 | -999 | -999 | 0.66 | -999 |
| 44 | -40.68 | 144.69 | -999 | -999 | 0.66 | -999 |
| 44 | -40.68 | 144.69 | -999 | -999 | 0.65 | -999 |
| 44 | -40.68 | 144.69 | -999 | -999 | 0.66 | -999 |
| 44 | -40.68 | 144.69 | -999 | -999 | 0.59 | -999 |
| 44 | -40.68 | 144.69 | -999 | -999 | 0.58 | -999 |
| 44 | -40.68 | 144.69 | -999 | -999 | 0.44 | -999 |
| 44 | -40.68 | 144.69 | -999 | -999 | 0.56 | -999 |
| 44 | -40.68 | 144.69 | -999 | -999 | 0.39 | -999 |
| 44 | -40.68 | 144.69 | -999 | -999 | 0.40 | -999 |
| 44 | -40.68 | 144.69 | -999 | -999 | 0.38 | -999 |
| 44 | -40.68 | 144.69 | -999 | -999 | 0.45 | -999 |
| 44 | -40.68 | 144.69 | -999 | -999 | 0.56 | -999 |
| 44 | -40.68 | 144.69 | -999 | -999 | 0.50 | -999 |
| 44 | -40.68 | 144.69 | -999 | -999 | 0.75 | -999 |
| 45 | 24.10  | 123.80 | -999 | -999 | 0.37 | -999 |
| 45 | 24.10  | 123.80 | -999 | -999 | 0.36 | -999 |
| 45 | 24.10  | 123.80 | -999 | -999 | 0.33 | -999 |
| 45 | 24.10  | 123.80 | -999 | -999 | 0.38 | -999 |
| 45 | 24.10  | 123.80 | -999 | -999 | 0.42 | -999 |
| 45 | 24.10  | 123.80 | -999 | -999 | 0.38 | -999 |
| 45 | 24.10  | 123.80 | -999 | -999 | 0.40 | -999 |
| 45 | 24.10  | 123.80 | -999 | -999 | 0.28 | -999 |
| 45 | 24.10  | 123.80 | -999 | -999 | 0.46 | -999 |
| 45 | 24.10  | 123.80 | -999 | -999 | 0.72 | -999 |
| 45 | 24.10  | 123.80 | -999 | -999 | 1.22 | -999 |
| 45 | 24.10  | 123.80 | -999 | -999 | 0.94 | -999 |
| 45 | 24.10  | 123.80 | -999 | -999 | 0.90 | -999 |
| 45 | 24.10  | 123.80 | -999 | -999 | 0.51 | -999 |
| 45 | 24.10  | 123.80 | -999 | -999 | 0.97 | -999 |
| 45 | 24.10  | 123.80 | -999 | -999 | 1.06 | -999 |

|    |       |        |      |      |      |      |
|----|-------|--------|------|------|------|------|
| 45 | 24.10 | 123.80 | -999 | -999 | 0.97 | -999 |
| 45 | 24.10 | 123.80 | -999 | -999 | 1.01 | -999 |
| 45 | 24.10 | 123.80 | -999 | -999 | 0.83 | -999 |
| 45 | 24.10 | 123.80 | -999 | -999 | 0.65 | -999 |
| 45 | 24.10 | 123.80 | -999 | -999 | 0.76 | -999 |
| 45 | 24.10 | 123.80 | -999 | -999 | 0.36 | -999 |
| 45 | 24.10 | 123.80 | -999 | -999 | 0.84 | -999 |
| 45 | 24.10 | 123.80 | -999 | -999 | 0.80 | -999 |
| 45 | 24.10 | 123.80 | -999 | -999 | 0.80 | -999 |
| 45 | 24.10 | 123.80 | -999 | -999 | 0.58 | -999 |
| 45 | 24.10 | 123.80 | -999 | -999 | 0.85 | -999 |
| 45 | 24.10 | 123.80 | -999 | -999 | 0.82 | -999 |
| 45 | 24.10 | 123.80 | -999 | -999 | 0.65 | -999 |
| 45 | 24.10 | 123.80 | -999 | -999 | 0.82 | -999 |
| 45 | 24.10 | 123.80 | -999 | -999 | 0.56 | -999 |
| 45 | 24.10 | 123.80 | -999 | -999 | 0.64 | -999 |
| 45 | 24.10 | 123.80 | -999 | -999 | 1.01 | -999 |
| 45 | 24.10 | 123.80 | -999 | -999 | 0.64 | -999 |
| 45 | 24.10 | 123.80 | -999 | -999 | 0.52 | -999 |
| 45 | 24.10 | 123.80 | -999 | -999 | 0.75 | -999 |
| 45 | 24.10 | 123.80 | -999 | -999 | 0.50 | -999 |
| 45 | 24.10 | 123.80 | -999 | -999 | 0.60 | -999 |
| 45 | 24.10 | 123.80 | -999 | -999 | 0.38 | -999 |
| 45 | 24.10 | 123.80 | -999 | -999 | 0.57 | -999 |
| 45 | 24.10 | 123.80 | -999 | -999 | 0.39 | -999 |
| 45 | 24.10 | 123.80 | -999 | -999 | 0.29 | -999 |
| 45 | 24.10 | 123.80 | -999 | -999 | 0.78 | -999 |
| 45 | 24.10 | 123.80 | -999 | -999 | 0.82 | -999 |
| 45 | 24.10 | 123.80 | -999 | -999 | 0.95 | -999 |
| 45 | 24.10 | 123.80 | -999 | -999 | 0.63 | -999 |
| 45 | 24.10 | 123.80 | -999 | -999 | 1.25 | -999 |
| 45 | 24.10 | 123.80 | -999 | -999 | 0.82 | -999 |
| 45 | 24.10 | 123.80 | -999 | -999 | 0.54 | -999 |
| 45 | 24.10 | 123.80 | -999 | -999 | 0.54 | -999 |
| 45 | 24.10 | 123.80 | -999 | -999 | 0.92 | -999 |
| 45 | 24.10 | 123.80 | -999 | -999 | 0.74 | -999 |
| 45 | 24.10 | 123.80 | -999 | -999 | 0.92 | -999 |
| 45 | 24.10 | 123.80 | -999 | -999 | 0.77 | -999 |
| 45 | 24.10 | 123.80 | -999 | -999 | 1.23 | -999 |
| 45 | 24.10 | 123.80 | -999 | -999 | 0.35 | -999 |
| 45 | 24.10 | 123.80 | -999 | -999 | 0.59 | -999 |
| 45 | 24.10 | 123.80 | -999 | -999 | 0.77 | -999 |
| 45 | 24.10 | 123.80 | -999 | -999 | 0.68 | -999 |
| 45 | 24.10 | 123.80 | -999 | -999 | 0.88 | -999 |
| 45 | 24.10 | 123.80 | -999 | -999 | 1.39 | -999 |
| 45 | 24.10 | 123.80 | -999 | -999 | 1.88 | -999 |
| 45 | 24.10 | 123.80 | -999 | -999 | 1.15 | -999 |

|    |       |        |      |      |      |      |
|----|-------|--------|------|------|------|------|
| 45 | 24.10 | 123.80 | -999 | -999 | 0.71 | -999 |
| 45 | 24.10 | 123.80 | -999 | -999 | 0.61 | -999 |
| 45 | 24.10 | 123.80 | -999 | -999 | 0.84 | -999 |
| 45 | 24.10 | 123.80 | -999 | -999 | 0.62 | -999 |
| 45 | 24.10 | 123.80 | -999 | -999 | 0.72 | -999 |
| 45 | 24.10 | 123.80 | -999 | -999 | 0.55 | -999 |
| 45 | 24.10 | 123.80 | -999 | -999 | 0.71 | -999 |
| 45 | 24.10 | 123.80 | -999 | -999 | 0.60 | -999 |
| 45 | 24.10 | 123.80 | -999 | -999 | 0.47 | -999 |
| 45 | 24.10 | 123.80 | -999 | -999 | 0.47 | -999 |
| 45 | 24.10 | 123.80 | -999 | -999 | 0.42 | -999 |
| 45 | 24.10 | 123.80 | -999 | -999 | 0.81 | -999 |
| 45 | 24.10 | 123.80 | -999 | -999 | 0.77 | -999 |
| 45 | 24.10 | 123.80 | -999 | -999 | 0.93 | -999 |
| 45 | 24.10 | 123.80 | -999 | -999 | 0.93 | -999 |
| 45 | 24.10 | 123.80 | -999 | -999 | 0.72 | -999 |
| 45 | 24.10 | 123.80 | -999 | -999 | 0.33 | -999 |
| 45 | 24.10 | 123.80 | -999 | -999 | 0.64 | -999 |
| 45 | 24.10 | 123.80 | -999 | -999 | 0.60 | -999 |
| 45 | 24.10 | 123.80 | -999 | -999 | 1.01 | -999 |
| 45 | 24.10 | 123.80 | -999 | -999 | 0.95 | -999 |
| 45 | 24.10 | 123.80 | -999 | -999 | 1.41 | -999 |
| 45 | 24.10 | 123.80 | -999 | -999 | 1.08 | -999 |
| 45 | 24.10 | 123.80 | -999 | -999 | 0.88 | -999 |
| 45 | 24.10 | 123.80 | -999 | -999 | 0.83 | -999 |
| 45 | 24.10 | 123.80 | -999 | -999 | 1.04 | -999 |
| 45 | 24.10 | 123.80 | -999 | -999 | 1.15 | -999 |
| 45 | 24.10 | 123.80 | -999 | -999 | 1.12 | -999 |
| 45 | 24.10 | 123.80 | -999 | -999 | 0.80 | -999 |
| 45 | 24.10 | 123.80 | -999 | -999 | 0.87 | -999 |
| 45 | 24.10 | 123.80 | -999 | -999 | 0.65 | -999 |
| 45 | 24.10 | 123.80 | -999 | -999 | 0.97 | -999 |
| 45 | 24.10 | 123.80 | -999 | -999 | 1.22 | -999 |
| 45 | 24.10 | 123.80 | -999 | -999 | 0.77 | -999 |
| 45 | 24.10 | 123.80 | -999 | -999 | 1.66 | -999 |
| 45 | 24.10 | 123.80 | -999 | -999 | 0.94 | -999 |
| 45 | 24.10 | 123.80 | -999 | -999 | 0.83 | -999 |
| 45 | 24.10 | 123.80 | -999 | -999 | 0.78 | -999 |
| 45 | 24.10 | 123.80 | -999 | -999 | 0.98 | -999 |
| 45 | 24.10 | 123.80 | -999 | -999 | 1.03 | -999 |
| 45 | 24.10 | 123.80 | -999 | -999 | 1.00 | -999 |
| 45 | 24.10 | 123.80 | -999 | -999 | 0.95 | -999 |
| 45 | 24.10 | 123.80 | -999 | -999 | 0.84 | -999 |
| 45 | 24.10 | 123.80 | -999 | -999 | 0.58 | -999 |
| 45 | 24.10 | 123.80 | -999 | -999 | 0.91 | -999 |
| 45 | 24.10 | 123.80 | -999 | -999 | 0.61 | -999 |
| 45 | 24.10 | 123.80 | -999 | -999 | 0.88 | -999 |

|    |       |         |      |      |      |      |
|----|-------|---------|------|------|------|------|
| 45 | 24.10 | 123.80  | -999 | -999 | 0.56 | -999 |
| 46 | 40.43 | 156.57  | -999 | -999 | 0.30 | -999 |
| 46 | 42.83 | 165.35  | -999 | -999 | 0.37 | -999 |
| 46 | 45.10 | 174.33  | -999 | -999 | 0.58 | -999 |
| 46 | 47.35 | -176.35 | -999 | -999 | 0.31 | -999 |
| 46 | 47.27 | -166.75 | -999 | -999 | 0.43 | -999 |
| 46 | 47.05 | -156.62 | -999 | -999 | 0.41 | -999 |
| 46 | 46.95 | -148.12 | -999 | -999 | 0.50 | -999 |
| 46 | 46.90 | -139.10 | -999 | -999 | 0.31 | -999 |
| 47 | 34.85 | 143.57  | -999 | -999 | 0.56 | -999 |
| 47 | 33.46 | 159.99  | -999 | -999 | 0.48 | -999 |
| 47 | 30.74 | 174.82  | -999 | -999 | 0.43 | -999 |
| 47 | 30.77 | -169.33 | -999 | -999 | 0.62 | -999 |
| 47 | 30.77 | -153.35 | -999 | -999 | 0.71 | -999 |
| 47 | 27.84 | -138.10 | -999 | -999 | 0.66 | -999 |
| 47 | 24.04 | -123.19 | -999 | -999 | 1.02 | -999 |
| 47 | 20.27 | -108.91 | -999 | -999 | 0.63 | -999 |
| 48 | 34.17 | 142.13  | -999 | -999 | 0.44 | -999 |
| 48 | 32.79 | 158.32  | -999 | -999 | 0.30 | -999 |
| 48 | 31.58 | 174.48  | -999 | -999 | 0.32 | -999 |
| 48 | 30.84 | -169.12 | -999 | -999 | 0.32 | -999 |
| 48 | 30.14 | -153.35 | -999 | -999 | 0.59 | -999 |
| 48 | 28.51 | -138.32 | -999 | -999 | 0.38 | -999 |
| 48 | 25.19 | -123.96 | -999 | -999 | 0.52 | -999 |
| 48 | 20.04 | -109.89 | -999 | -999 | 0.51 | -999 |
| 49 | 40.80 | 154.73  | -999 | -999 | 0.21 | -999 |
| 49 | 42.47 | 162.63  | -999 | -999 | 0.24 | -999 |
| 49 | 43.57 | 172.28  | -999 | -999 | 0.21 | -999 |
| 49 | 44.55 | -176.37 | -999 | -999 | 0.24 | -999 |
| 49 | 45.56 | -168.15 | -999 | -999 | 0.39 | -999 |
| 49 | 46.62 | -158.28 | -999 | -999 | 0.93 | -999 |
| 49 | 47.40 | -148.23 | -999 | -999 | 0.37 | -999 |
| 49 | 47.46 | -138.85 | -999 | -999 | 0.37 | -999 |
| 50 | 36.52 | 151.60  | -999 | -999 | 0.35 | -999 |
| 50 | 37.00 | 160.10  | -999 | -999 | 0.32 | -999 |
| 50 | 37.00 | 168.44  | -999 | -999 | 0.47 | -999 |
| 50 | 37.01 | 177.40  | -999 | -999 | 0.53 | -999 |
| 50 | 37.01 | -173.81 | -999 | -999 | 0.33 | -999 |
| 50 | 36.98 | -166.02 | -999 | -999 | 0.28 | -999 |
| 50 | 37.00 | -159.70 | -999 | -999 | 0.69 | -999 |
| 50 | 37.49 | -151.74 | -999 | -999 | 0.57 | -999 |
| 51 | 39.98 | 148.68  | -999 | -999 | 0.30 | -999 |
| 51 | 44.20 | 155.33  | -999 | -999 | 0.23 | -999 |
| 51 | 48.20 | 163.27  | -999 | -999 | 0.26 | -999 |
| 51 | 51.52 | 173.22  | -999 | -999 | 0.20 | -999 |
| 51 | 53.30 | -176.57 | -999 | -999 | 0.19 | -999 |

|    |       |         |      |      |      |      |
|----|-------|---------|------|------|------|------|
| 51 | 54.37 | -165.43 | -999 | -999 | 0.20 | -999 |
| 51 | 53.60 | -154.72 | -999 | -999 | 0.26 | -999 |
| 51 | 52.10 | -144.03 | -999 | -999 | 0.22 | -999 |
| 52 | 36.07 | 149.24  | -999 | -999 | 0.39 | -999 |
| 52 | 38.07 | 164.09  | -999 | -999 | 0.37 | -999 |
| 52 | 37.31 | 179.98  | -999 | -999 | -999 | -999 |
| 52 | 35.40 | -163.77 | -999 | -999 | 0.46 | -999 |
| 52 | 33.05 | -147.71 | -999 | -999 | 0.73 | -999 |
| 52 | 29.66 | -132.09 | -999 | -999 | 0.60 | -999 |
| 52 | 24.49 | -117.42 | -999 | -999 | 0.52 | -999 |
| 52 | 17.91 | -103.79 | -999 | -999 | 1.24 | -999 |
| 53 | 34.97 | 142.84  | -999 | -999 | 1.03 | -999 |
| 53 | 37.99 | 160.20  | -999 | -999 | 0.73 | -999 |
| 53 | 37.92 | 177.52  | -999 | -999 | 0.49 | -999 |
| 53 | 37.64 | -165.19 | -999 | -999 | 0.90 | -999 |
| 53 | 37.50 | -147.50 | -999 | -999 | 0.38 | -999 |
| 53 | 32.33 | -132.73 | -999 | -999 | 1.45 | -999 |
| 53 | 25.32 | -118.75 | -999 | -999 | 1.39 | -999 |
| 53 | 18.34 | -105.30 | -999 | -999 | 0.98 | -999 |
| 54 | 36.11 | 151.07  | -999 | -999 | 1.12 | -999 |
| 54 | 37.30 | 159.76  | -999 | -999 | 0.85 | -999 |
| 54 | 38.28 | 169.05  | -999 | -999 | 0.67 | -999 |
| 54 | 39.34 | 177.50  | -999 | -999 | 0.31 | -999 |
| 54 | 39.34 | -172.48 | -999 | -999 | 0.50 | -999 |
| 54 | 41.75 | -163.78 | -999 | -999 | 0.80 | -999 |
| 54 | 42.62 | -156.36 | -999 | -999 | 0.60 | -999 |
| 54 | 43.47 | -147.23 | -999 | -999 | 0.22 | -999 |
| 55 | 36.03 | 150.94  | -999 | -999 | 1.14 | -999 |
| 55 | 37.22 | 159.79  | -999 | -999 | 0.90 | -999 |
| 55 | 37.94 | 168.67  | -999 | -999 | 0.46 | -999 |
| 55 | 39.63 | 176.50  | -999 | -999 | 0.53 | -999 |
| 55 | 42.27 | -175.62 | -999 | -999 | 0.20 | -999 |
| 55 | 43.98 | -166.51 | -999 | -999 | 0.60 | -999 |
| 55 | 45.57 | -158.87 | -999 | -999 | 1.03 | -999 |
| 55 | 47.15 | -151.31 | -999 | -999 | 0.61 | -999 |
| 56 | 38.84 | 148.80  | -999 | -999 | 0.29 | -999 |
| 56 | 42.26 | 155.88  | -999 | -999 | 0.38 | -999 |
| 56 | 45.33 | 163.81  | -999 | -999 | 0.24 | -999 |
| 56 | 43.52 | 171.75  | -999 | -999 | 0.25 | -999 |
| 56 | 42.21 | -179.95 | -999 | -999 | 0.22 | -999 |
| 56 | 40.56 | -171.10 | -999 | -999 | 0.28 | -999 |
| 56 | 37.58 | -163.44 | -999 | -999 | 0.34 | -999 |
| 56 | 33.69 | -156.24 | -999 | -999 | 0.24 | -999 |
| 57 | 35.00 | 143.08  | -999 | -999 | 0.67 | -999 |
| 57 | 38.08 | 159.73  | -999 | -999 | 0.27 | -999 |
| 57 | 39.77 | 177.60  | -999 | -999 | 0.58 | -999 |

|    |       |         |      |      |      |      |
|----|-------|---------|------|------|------|------|
| 57 | 40.70 | -173.24 | -999 | -999 | 0.44 | -999 |
| 57 | 41.58 | -164.33 | -999 | -999 | 0.46 | -999 |
| 57 | 42.52 | -155.08 | -999 | -999 | 0.58 | -999 |
| 57 | 43.45 | -145.65 | -999 | -999 | 0.74 | -999 |
| 57 | 44.54 | -136.23 | -999 | -999 | 0.64 | -999 |
| 58 | 53.98 | 171.93  | -999 | -999 | 0.44 | -999 |
| 58 | 53.10 | 168.20  | -999 | -999 | 0.49 | -999 |
| 58 | 51.85 | 164.98  | -999 | -999 | 1.51 | -999 |
| 58 | 50.50 | 161.98  | -999 | -999 | 1.55 | -999 |
| 58 | 49.03 | 159.07  | -999 | -999 | 0.52 | -999 |
| 58 | 47.60 | 176.93  | -999 | -999 | 0.38 | -999 |
| 58 | 45.95 | 153.73  | -999 | -999 | 0.44 | -999 |
| 58 | 44.25 | 151.20  | -999 | -999 | 0.77 | -999 |
| 59 | 34.97 | 142.84  | -999 | -999 | 1.03 | -999 |
| 59 | 37.99 | 160.20  | -999 | -999 | 0.73 | -999 |
| 59 | 37.92 | 177.52  | -999 | -999 | 0.49 | -999 |
| 59 | 37.64 | -165.19 | -999 | -999 | 0.90 | -999 |
| 59 | 37.50 | -147.50 | -999 | -999 | 0.38 | -999 |
| 59 | 32.33 | -132.73 | -999 | -999 | 1.45 | -999 |
| 59 | 25.32 | -118.75 | -999 | -999 | 1.39 | -999 |
| 59 | 18.34 | -105.30 | -999 | -999 | 0.98 | -999 |
| 60 | 40.72 | 149.20  | -999 | -999 | 1.92 | -999 |
| 60 | 44.58 | 157.08  | -999 | -999 | 1.10 | -999 |
| 60 | 47.68 | 165.90  | -999 | -999 | 1.69 | -999 |
| 60 | 48.57 | 176.32  | -999 | -999 | 2.09 | -999 |
| 60 | 48.55 | -173.65 | -999 | -999 | 0.57 | -999 |
| 60 | 48.00 | -164.62 | -999 | -999 | 0.61 | -999 |
| 60 | 47.57 | -154.57 | -999 | -999 | -999 | -999 |
| 60 | 47.67 | -144.48 | -999 | -999 | 0.66 | -999 |
| 61 | 38.90 | 150.53  | -999 | -999 | 0.69 | -999 |
| 61 | 41.32 | 158.77  | -999 | -999 | 1.20 | -999 |
| 61 | 44.00 | 167.92  | -999 | -999 | 1.39 | -999 |
| 61 | 46.55 | 177.22  | -999 | -999 | 1.20 | -999 |
| 61 | 48.75 | -172.73 | -999 | -999 | 1.79 | -999 |
| 61 | 49.97 | -161.88 | -999 | -999 | 1.47 | -999 |
| 61 | 50.13 | -151.10 | -999 | -999 | 1.39 | -999 |
| 61 | 49.40 | -140.68 | -999 | -999 | 0.76 | -999 |
| 62 | 36.37 | 150.13  | -999 | -999 | 0.75 | -999 |
| 62 | 39.73 | 167.08  | -999 | -999 | -999 | -999 |
| 62 | 39.90 | -174.40 | -999 | -999 | 0.39 | -999 |
| 62 | 39.32 | -156.67 | -999 | -999 | 0.28 | -999 |
| 62 | 35.65 | -149.02 | -999 | -999 | 0.61 | -999 |
| 62 | 29.80 | -124.98 | -999 | -999 | 0.74 | -999 |
| 62 | 22.80 | -111.42 | -999 | -999 | 1.13 | -999 |
| 62 | 15.98 | -98.37  | -999 | -999 | 1.00 | -999 |
| 63 | 54.17 | 173.57  | -999 | -999 | 0.85 | -999 |

|    |       |         |      |      |      |      |
|----|-------|---------|------|------|------|------|
| 63 | 53.53 | 169.05  | -999 | -999 | 0.70 | -999 |
| 63 | 52.43 | 164.70  | -999 | -999 | 1.25 | -999 |
| 63 | 51.23 | 160.78  | -999 | -999 | 2.07 | -999 |
| 63 | 49.93 | 157.25  | -999 | -999 | 1.55 | -999 |
| 63 | 48.23 | 153.95  | -999 | -999 | 1.34 | -999 |
| 63 | 47.13 | 151.05  | -999 | -999 | 0.98 | -999 |
| 63 | 44.22 | 148.07  | -999 | -999 | 1.41 | -999 |
| 64 | 34.88 | 143.15  | -999 | -999 | 0.53 | -999 |
| 64 | 36.88 | 160.57  | -999 | -999 | 0.69 | -999 |
| 64 | 38.13 | 177.85  | -999 | -999 | 0.94 | -999 |
| 64 | 37.50 | -164.93 | -999 | -999 | 0.60 | -999 |
| 64 | 36.17 | -149.15 | -999 | -999 | 1.31 | -999 |
| 64 | 33.10 | -134.22 | -999 | -999 | 1.00 | -999 |
| 64 | 27.42 | -119.60 | -999 | -999 | 1.17 | -999 |
| 64 | 19.62 | -106.45 | -999 | -999 | -999 | -999 |
| 65 | 37.52 | 152.13  | -999 | -999 | 0.76 | -999 |
| 65 | 39.55 | 160.90  | -999 | -999 | 0.81 | -999 |
| 65 | 41.62 | 170.12  | -999 | -999 | 1.37 | -999 |
| 65 | 43.72 | 179.38  | -999 | -999 | 1.18 | -999 |
| 65 | 45.77 | -171.23 | -999 | -999 | 0.79 | -999 |
| 65 | 47.42 | -161.45 | -999 | -999 | 0.83 | -999 |
| 65 | 48.32 | -151.15 | -999 | -999 | 1.12 | -999 |
| 65 | 48.25 | -140.42 | -999 | -999 | 1.13 | -999 |
| 66 | 36.73 | 151.97  | -999 | -999 | 0.40 | -999 |
| 66 | 38.02 | 168.90  | -999 | -999 | 0.46 | -999 |
| 66 | 37.80 | -173.63 | -999 | -999 | 0.54 | -999 |
| 66 | 37.45 | -156.75 | -999 | -999 | 0.57 | -999 |
| 66 | 36.90 | -139.65 | -999 | -999 | 0.64 | -999 |
| 66 | 31.25 | -124.02 | -999 | -999 | 0.84 | -999 |
| 66 | 22.70 | -111.02 | -999 | -999 | 1.05 | -999 |
| 66 | 15.77 | -97.82  | -999 | -999 | 0.52 | -999 |
| 67 | 37.97 | 147.68  | -999 | -999 | 0.64 | -999 |
| 67 | 40.48 | 155.15  | -999 | -999 | 0.54 | -999 |
| 67 | 42.88 | 164.48  | -999 | -999 | 0.65 | -999 |
| 67 | 45.55 | 173.43  | -999 | -999 | 0.53 | -999 |
| 67 | 47.60 | 176.45  | -999 | -999 | 0.34 | -999 |
| 67 | 47.45 | -165.37 | -999 | -999 | 0.46 | -999 |
| 67 | 48.57 | -157.67 | -999 | -999 | 0.82 | -999 |
| 67 | 47.83 | -150.27 | -999 | -999 | 1.11 | -999 |
| 68 | 52.83 | 171.03  | -999 | -999 | 0.45 | -999 |
| 68 | 51.83 | 166.90  | -999 | -999 | 0.59 | -999 |
| 68 | 50.68 | 163.03  | -999 | -999 | 0.51 | -999 |
| 68 | 49.32 | 159.13  | -999 | -999 | 0.80 | -999 |
| 68 | 47.87 | 155.52  | -999 | -999 | 0.70 | -999 |
| 68 | 46.33 | 152.15  | -999 | -999 | 0.82 | -999 |
| 68 | 44.42 | 148.45  | -999 | -999 | 0.79 | -999 |



|    |       |         |      |      |      |      |
|----|-------|---------|------|------|------|------|
| 68 | 42.65 | 145.18  | -999 | -999 | 0.63 | -999 |
| 69 | 35.82 | 150.63  | -999 | -999 | 0.78 | -999 |
| 69 | 36.83 | 167.23  | -999 | -999 | 0.58 | -999 |
| 69 | 35.85 | -176.57 | -999 | -999 | 0.71 | -999 |
| 69 | 35.83 | -160.40 | -999 | -999 | 0.59 | -999 |
| 69 | 33.48 | -143.72 | -999 | -999 | 0.84 | -999 |
| 69 | 31.13 | -127.58 | -999 | -999 | 1.08 | -999 |
| 69 | 24.10 | -113.62 | -999 | -999 | 0.74 | -999 |
| 69 | 16.48 | -100.54 | -999 | -999 | 1.18 | -999 |
| 70 | 37.51 | 162.58  | -999 | -999 | 0.59 | -999 |
| 70 | 38.97 | 170.83  | -999 | -999 | 0.56 | -999 |
| 70 | 39.02 | 178.42  | -999 | -999 | 0.61 | -999 |
| 70 | 37.22 | -173.73 | -999 | -999 | 0.72 | -999 |
| 70 | 36.22 | -165.47 | -999 | -999 | 0.54 | -999 |
| 70 | 35.32 | -156.97 | -999 | -999 | 0.61 | -999 |
| 70 | 34.48 | -149.42 | -999 | -999 | 0.63 | -999 |
| 70 | 33.13 | -141.48 | -999 | -999 | 0.57 | -999 |
| 71 | 36.33 | 150.28  | -999 | -999 | 0.56 | -999 |
| 71 | 38.00 | 167.17  | -999 | -999 | 0.83 | -999 |
| 71 | 38.02 | -174.88 | -999 | -999 | 0.62 | -999 |
| 71 | 38.00 | -157.50 | -999 | -999 | 1.27 | -999 |
| 71 | 37.12 | -141.42 | -999 | -999 | 0.62 | -999 |
| 72 | 54.32 | 175.05  | -999 | -999 | 0.51 | -999 |
| 72 | 53.82 | 170.35  | -999 | -999 | 0.50 | -999 |
| 72 | 53.25 | 166.35  | -999 | -999 | 0.43 | -999 |
| 72 | 52.35 | 161.57  | -999 | -999 | 0.60 | -999 |
| 72 | 50.83 | 158.23  | -999 | -999 | 0.67 | -999 |
| 72 | 48.70 | 155.12  | -999 | -999 | 0.68 | -999 |
| 72 | 44.87 | 149.72  | -999 | -999 | 0.70 | -999 |
| 72 | 43.43 | 146.63  | -999 | -999 | 0.84 | -999 |
| 73 | 33.45 | 150.95  | -999 | -999 | 0.48 | -999 |
| 73 | 31.82 | 167.15  | -999 | -999 | 0.52 | -999 |
| 73 | 29.77 | -177.35 | -999 | -999 | 0.56 | -999 |
| 73 | 28.28 | -162.00 | -999 | -999 | 0.96 | -999 |
| 73 | 27.57 | -146.43 | -999 | -999 | 0.84 | -999 |
| 73 | 27.82 | -131.17 | -999 | -999 | 0.74 | -999 |
| 73 | 23.05 | -117.47 | -999 | -999 | 0.80 | -999 |
| 73 | 17.85 | -103.65 | -999 | -999 | 1.65 | -999 |
| 74 | 34.27 | 158.43  | -999 | -999 | 0.58 | -999 |
| 74 | 34.58 | 166.45  | -999 | -999 | 0.53 | -999 |
| 74 | 34.60 | 174.58  | -999 | -999 | 0.55 | -999 |
| 74 | 35.43 | -177.75 | -999 | -999 | 0.40 | -999 |
| 74 | 37.38 | -169.67 | -999 | -999 | 0.36 | -999 |
| 74 | 39.33 | -161.65 | -999 | -999 | 0.30 | -999 |
| 74 | 40.63 | -153.43 | -999 | -999 | 0.48 | -999 |
| 74 | 40.92 | -144.97 | -999 | -999 | 0.41 | -999 |

**Table S5.** Metadata information of the corresponding datasets listed in Table S4 sorted for the identifier.

| Identifier | Metadata                         |                                                                                                                                                                                                                                                                        |
|------------|----------------------------------|------------------------------------------------------------------------------------------------------------------------------------------------------------------------------------------------------------------------------------------------------------------------|
| 1          | Platform type and name           | Ship, Meteor                                                                                                                                                                                                                                                           |
|            | Expedition name                  | M55                                                                                                                                                                                                                                                                    |
|            | Cruise start date (UTC)          | 10/12/2002                                                                                                                                                                                                                                                             |
|            | EXPOCODE                         | 06M320021012                                                                                                                                                                                                                                                           |
|            | Dataset creator                  | Elliot Atlas                                                                                                                                                                                                                                                           |
|            | PI contact details               | Elliot Atlas, RSMAS, eatlas@rsmas.miami.edu                                                                                                                                                                                                                            |
|            | Data set origin                  | Hostdata centre: <a href="http://www-gte.larc.nasa.gov/trace/TP_dat_alt.htm">http://www-gte.larc.nasa.gov/trace/TP_dat_alt.htm</a> (Download: March 2010)                                                                                                              |
|            | Relevant publications            | Quack, B., Atlas, E., Petrick, G., Stroud, V., Schauffler, S. and Wallace, D.W.R. (2004), Oceanic bromoform sources for the tropical atmosphere, Geophysiscal Research Letters, Vol. 31, L23S05, doi:10.1029/2004GL020597                                              |
|            | Sampling technique               | Stainless steel canisters                                                                                                                                                                                                                                              |
|            | Analysis and detection technique | GC/MS (SIM), Schauffler, S. M., E. L. Atlas, D. R. Blake, F. Flocke, R. A. Lueb, J. M. Lee-Taylor, V. Stroud, and W. Travnicek (1999), Distributions of brominated organic compounds in the troposphere and lower stratosphere, J. Geophys. Res., 104, 21,513– 21,535. |
|            | Calibration technique            | AED (atmospheric standard)                                                                                                                                                                                                                                             |
|            | Standard referred to             | RSMAS scale                                                                                                                                                                                                                                                            |

|   |                                  |                                                                                                                                                                                                                                                                                                                                                                                                                          |
|---|----------------------------------|--------------------------------------------------------------------------------------------------------------------------------------------------------------------------------------------------------------------------------------------------------------------------------------------------------------------------------------------------------------------------------------------------------------------------|
| 2 | Platform type and name           | Ship, Polarstern                                                                                                                                                                                                                                                                                                                                                                                                         |
|   | Expedition name                  | BLAST 2 (Bremerhaven-Punta Arenas: 18.10.-21.11.1994)                                                                                                                                                                                                                                                                                                                                                                    |
|   | Cruise start date (UTC)          | 10/18/1994                                                                                                                                                                                                                                                                                                                                                                                                               |
|   | EXPOCODE                         | 06AQ19941018                                                                                                                                                                                                                                                                                                                                                                                                             |
|   | Dataset creator                  | Juergen. M. Lobert                                                                                                                                                                                                                                                                                                                                                                                                       |
|   | PI contact details               | James H. Butler, NOAA, James.H.Butler@noaa.gov                                                                                                                                                                                                                                                                                                                                                                           |
|   | Data set origin                  | Host data centre: ftp://ftp.cmdl.noaa.gov/hats/ocean/Ocean%20GCMS%20Data%20 1994-2004/<br>(Download: March 2010)                                                                                                                                                                                                                                                                                                         |
|   | Relevant publications            | 1) Butler, J.H., King, D.B., Lobert, J.M., Montzka, S.A., Yvon-Lewis, S.A., Hall, B.D., Warwick, N.J., Mondeel, D.J., Aydin, M. and Elkins, J.W., Oceanic distributions and emissions of short-lived halocarbons, Global Biochemical Cycles, Vol. 21, GB1023 (2006)<br>2)ftp://ftp.cmdl.noaa.gov/hats/ocean/Ocean%20GCMS%20Data%201994-2004/Message%20to%20potential%20users%20of%20these%20data%20(31%20Aug%202005).pdf |
|   | Sampling technique               | equilibrator (trapping of gases from equilibrated seawater and air on adsorbents)                                                                                                                                                                                                                                                                                                                                        |
|   | Analysis and detection technique | Gas chromatography / mass spectrometer (GC/MS) (HCFC-22, CFC-12, CH3Cl, CFC-114, Halon-1211, CH3Br, CFC-11, CH3I, Isoprene, CFC-113, CH2Cl2, CH2BrCl, CHCl3, CH3CCl3, C6H6, CCl4, C2HCl3, CH2Br2, CH2ICl, C7H8, CHBr2Cl, C2Cl4, CHBr3, CH2I2)                                                                                                                                                                            |
|   | Calibration technique            | Gas standard, ftp://ftp.cmdl.noaa.gov/hats/ocean/Ocean%20GCMS%20Data%201994-2004/Message%20to%20potential%20users%20of%20these%20data%20(31%20Aug%202005).pdf                                                                                                                                                                                                                                                            |
|   | Standard referred to             | NOAA scale                                                                                                                                                                                                                                                                                                                                                                                                               |

|   |                                  |                                                                                                                                                                                                                                                                     |
|---|----------------------------------|---------------------------------------------------------------------------------------------------------------------------------------------------------------------------------------------------------------------------------------------------------------------|
| 3 | Platform type and name           | Ship, Nathaniel B. Palmer                                                                                                                                                                                                                                           |
|   | Expedition name                  | BLAST 3 (McMurdo, Antarctica-Punta Arenas: 22.02.-07.04.1996)                                                                                                                                                                                                       |
|   | Cruise start date (UTC)          | 2/22/1996                                                                                                                                                                                                                                                           |
|   | EXPOCODE                         | 320619960222                                                                                                                                                                                                                                                        |
|   | Dataset creator                  | Juergen M. Lobert                                                                                                                                                                                                                                                   |
|   | PI contact details               | James H. Butler, NOAA, James.H.Butler@noaa.gov                                                                                                                                                                                                                      |
|   | Data set origin                  | Host data centre: ftp://ftp.cmdl.noaa.gov/hats/ocean/Ocean%20GCMS%20Data%201994-2004/<br>(Download: March 2010)                                                                                                                                                     |
|   | Relevant publications            | Butler, J.H., King, D.B., Lobert, J.M., Montzka, S.A., Yvon-Lewis, S.A., Hall, B.D., Warwick, N.J., Mondeel, D.J., Aydin, M. and Elkins, J.W., Oceanic distributions and emissions of short-lived halocarbons, Global Biochemical Cycles, Vol. 21, GB1023 (2006)    |
|   | Sampling technique               | equilibrator (trapping of gases from equilibrated seawater and air on adsorbents)                                                                                                                                                                                   |
|   | Analysis and detection technique | Gas chromatography / mass spectrometer (GC/MS) (HCFC-22, CFC-12, CH3Cl, CFC-114, Halon-1211, CH3Br, CFC-11, CH3I, Isoprene, CFC-113, CH2Cl2, CH2BrCl, CHCl3, CH3CCl3, C6H6, CCl4, C2HCl3, CH2Br2, CH2ICl, C7H8, CHBr2Cl, C2Cl4, CHBr3, CH2I2)                       |
|   | Calibration technique            | Gas standard, ftp://ftp.cmdl.noaa.gov/hats/ocean/Ocean%20GCMS%20Data%201994-2004/Message%20to%20potential%20users%20of%20these%20data%20(31%20Aug%202005).pdf                                                                                                       |
|   | Standard referred to             | NOAA scale                                                                                                                                                                                                                                                          |
| 4 | Platform type and name           | Ship, Aurora Australis                                                                                                                                                                                                                                              |
|   | Cruise start date (UTC)          | 10/29/2001                                                                                                                                                                                                                                                          |
|   | EXPOCODE                         | 09AR20011029                                                                                                                                                                                                                                                        |
|   | Dataset creator                  | Daniel B. King                                                                                                                                                                                                                                                      |
|   | PI contact details               | James H. Butler, NOAA, James.H.Butler@noaa.gov                                                                                                                                                                                                                      |
|   | Data set origin                  | Host data centre: ftp://ftp.cmdl.noaa.gov/hats/ocean/Ocean%20GCMS%20Data%201994-2004/<br>(Download: March 2010)                                                                                                                                                     |
|   | Relevant publications            | 1) Butler, J.H., King, D.B., Lobert, J.M., Montzka, S.A., Yvon-Lewis, S.A., Hall, B.D., Warwick, N.J., Mondeel, D.J., Aydin, M. and Elkins, J.W., Oceanic distributions and emissions of short-lived halocarbons, Global Biochemical Cycles, Vol. 21, GB1023 (2006) |

|          |                                  |                                                                                                                                                                                                                                                                                                                                                                                                                           |
|----------|----------------------------------|---------------------------------------------------------------------------------------------------------------------------------------------------------------------------------------------------------------------------------------------------------------------------------------------------------------------------------------------------------------------------------------------------------------------------|
|          | Relevant publications            | 2)ftp://ftp.cmdl.noaa.gov/hats/ocean/Ocean%20GCMS%20Data%201994-2004/Message%20to%20potential%20users%20of%20these%20data%20(31%20Aug%202005).pdf                                                                                                                                                                                                                                                                         |
|          | Sampling technique               | equilibrator (trapping of gases from equilibrated seawater and air on adsorbents)                                                                                                                                                                                                                                                                                                                                         |
|          | Analysis and detection technique | Gas chromatography / mass spectrometer (GC/MS) (HCFC-22, CFC-12, CH3Cl, CFC-114, Halon-1211, CH3Br, CFC-11, CH3I, Isoprene, CFC-113, CH2Cl2, CH2BrCl, CHCl3, CH3CCl3, C6H6, CCl4, C2HCl3, CH2Br2, CH2ICl, C7H8, CHBr2Cl, C2Cl4, CHBr3, CH2I2)                                                                                                                                                                             |
|          | Calibration technique            | Gas standard, ftp://ftp.cmdl.noaa.gov/hats/ocean/Ocean%20GCMS%20Data%201994-2004/Message%20to%20potential%20users%20of%20these%20data%20(31%20Aug%202005).pdf                                                                                                                                                                                                                                                             |
|          | Standard referred to             | NOAA scale                                                                                                                                                                                                                                                                                                                                                                                                                |
| <b>5</b> | Platform type and name           | Ship, NOAA Ship Ronald H. Brown                                                                                                                                                                                                                                                                                                                                                                                           |
|          | Expedition name                  | Gas Ex 98 (Miami-Newport, North Atlantic and Northeast Pacific, 07.05.1998-27.07.1998)                                                                                                                                                                                                                                                                                                                                    |
|          | Cruise start date (UTC)          | 5/7/1998 0:00                                                                                                                                                                                                                                                                                                                                                                                                             |
|          | EXPOCODE                         | 33RO19980507                                                                                                                                                                                                                                                                                                                                                                                                              |
|          | Dataset creator                  | Daniel B. King                                                                                                                                                                                                                                                                                                                                                                                                            |
|          | PI contact details               | James H. Butler, NOAA, James.H.Butler@noaa.gov                                                                                                                                                                                                                                                                                                                                                                            |
|          | Data set origin                  | Host data centre: ftp://ftp.cmdl.noaa.gov/hats/ocean/gasex_98 (Download: March 2010)                                                                                                                                                                                                                                                                                                                                      |
|          | Relevant publications            | 1) Butler, J.H., King, D.B., Lobert, J.M., Montzka, S.A., Yvon-Lewis, S.A., Hall, B.D., Warwick, N.J., Mondeel, D.J., Aydin, M. and Elkins, J.W., Oceanic distributions and emissions of short-lived halocarbons, Global Biochemical Cycles, Vol. 21, GB1023 (2006)<br>2) ftp://ftp.cmdl.noaa.gov/hats/ocean/Ocean%20GCMS%20Data%201994-2004/Message%20to%20potential%20users%20of%20these%20data%20(31%20Aug%202005).pdf |
|          | Sampling technique               | equilibrator (trapping of gases from equilibrated seawater and air on adsorbents)                                                                                                                                                                                                                                                                                                                                         |
|          | Analysis and detection technique | Gas chromatography / mass spectrometer (GC/MS) (HCFC-22, CFC-12, CH3Cl, CFC-114, Halon-1211, CH3Br, CFC-11, CH3I, Isoprene, CFC-113, CH2Cl2, CH2BrCl, CHCl3, CH3CCl3, C6H6, CCl4, C2HCl3, CH2Br2, CH2ICl, C7H8, CHBr2Cl, C2Cl4, CHBr3, CH2I2)                                                                                                                                                                             |
|          | Calibration technique            | Gas standard, ftp://ftp.cmdl.noaa.gov/hats/ocean/Ocean%20GCMS%20Data%201994-2004/Message%20to%20potential%20users%20of%20these%20data%20(31%20Aug%202005).pdf                                                                                                                                                                                                                                                             |
|          | Standard referred to             | NOAA scale                                                                                                                                                                                                                                                                                                                                                                                                                |

|   |                                                                                                                                                                                                                                                                                                                                     |                                                                                                                                                                                                                                                                                                                                                                                                                                                                                                                                                                                                                                                                                                                                                                                                                                                                                                                                                                                                                                                                                                                                                                                                                                                                                                                                                                                                                                                                                                                                                                                        |
|---|-------------------------------------------------------------------------------------------------------------------------------------------------------------------------------------------------------------------------------------------------------------------------------------------------------------------------------------|----------------------------------------------------------------------------------------------------------------------------------------------------------------------------------------------------------------------------------------------------------------------------------------------------------------------------------------------------------------------------------------------------------------------------------------------------------------------------------------------------------------------------------------------------------------------------------------------------------------------------------------------------------------------------------------------------------------------------------------------------------------------------------------------------------------------------------------------------------------------------------------------------------------------------------------------------------------------------------------------------------------------------------------------------------------------------------------------------------------------------------------------------------------------------------------------------------------------------------------------------------------------------------------------------------------------------------------------------------------------------------------------------------------------------------------------------------------------------------------------------------------------------------------------------------------------------------------|
| 6 | <p>Platform type and name</p> <p>Expedition name</p> <p>Cruise start date (UTC)</p> <p>EXPOCODE</p> <p>Dataset creator</p> <p>PI contact details</p> <p>Data set origin</p> <p>Relevant publications</p> <p>Sampling technique</p> <p>Analysis and detection technique</p> <p>Calibration technique</p> <p>Standard referred to</p> | <p>Ship, R/V Wecoma</p> <p>Phase 1-04 (Guam-Newport, 22.05.2004-02.07.2004)</p> <p>5/22/2004 0:00</p> <p>32WC20040522</p> <p>Daniel B. King</p> <p>James H. Butler, NOAA, James.H.Butler@noaa.gov</p> <p>Host data centre: ftp://ftp.cmdl.noaa.gov/hats/ocean/Ocean%20GCMS%20Data%201994-2004/ (Download: March 2010)</p> <p>1) Butler, J.H., King, D.B., Lobert, J.M., Montzka, S.A., Yvon-Lewis, S.A., Hall, B.D., Warwick, N.J., Mondeel, D.J., Aydin, M. and Elkins, J.W., Oceanic distributions and emissions of short-lived halocarbons, Global Biochemical Cycles, Vol. 21, GB1023 (2006)</p> <p>2) ftp://ftp.cmdl.noaa.gov/hats/ocean/Ocean%20GCMS%20Data%201994-2004/Message%20to%20potential%20users%20of%20these%20data%20(31%20Aug%202005).pdf</p> <p>equilibrator (trapping of gases from equilibrated seawater and air on adsorbents)</p> <p>Gas chromatography / mass spectrometer (GC/MS) (HCFC-22, CFC-12, CH<sub>3</sub>Cl, CFC-114, Halon-1211, CH<sub>3</sub>Br, CFC-11, CH<sub>3</sub>I, Isoprene, CFC-113, CH<sub>2</sub>Cl<sub>2</sub>, CH<sub>2</sub>BrCl, CHCl<sub>3</sub>, CH<sub>3</sub>CCl<sub>3</sub>, C<sub>6</sub>H<sub>6</sub>, CCl<sub>4</sub>, C<sub>2</sub>HCl<sub>3</sub>, CH<sub>2</sub>Br<sub>2</sub>, CH<sub>2</sub>ICl, C<sub>7</sub>H<sub>8</sub>, CHBr<sub>2</sub>Cl, C<sub>2</sub>Cl<sub>4</sub>, CHBr<sub>3</sub>, CH<sub>2</sub>I<sub>2</sub>)</p> <p>Gas standard, ftp://ftp.cmdl.noaa.gov/hats/ocean/Ocean%20GCMS%20Data%201994-2004/Message%20to%20potential%20users%20of%20these%20data%20(31%20Aug%202005).pdf</p> <p>NOAA scale</p> |
| 7 | <p>Platform type and name</p> <p>Expedition name</p> <p>Cruise start date (UTC)</p> <p>EXPOCODE</p> <p>Dataset creator</p> <p>PI contact details</p> <p>Data set origin</p> <p>Relevant publications</p>                                                                                                                            | <p>Ship, NOAA Ship Ronald H. Brown</p> <p>RB-99-06 (BACPAC 99) (Kwajalein, Marshall Islands- Seattle, Washington, North Pacific, 14.09.1999-23.10.1999)</p> <p>9/14/1999 0:00</p> <p>33RO19990914</p> <p>Daniel B. King</p> <p>James H. Butler, NOAA, James.H.Butler@noaa.gov</p> <p>Host data centre: ftp://ftp.cmdl.noaa.gov/hats/ocean/ (Download: March 2010)</p> <p>1) Butler, J.H., King, D.B., Lobert, J.M., Montzka, S.A., Yvon-Lewis, S.A., Hall, B.D., Warwick, N.J., Mondeel, D.J., Aydin, M. and Elkins, J.W., Oceanic distributions and emissions of short-lived halocarbons, Global Biochemical Cycles, Vol. 21, GB1023 (2006)</p>                                                                                                                                                                                                                                                                                                                                                                                                                                                                                                                                                                                                                                                                                                                                                                                                                                                                                                                                       |

|   |                                  |                                                                                                                                                                                                                                                                                                                                                                                                                                                                                                                                                                                    |
|---|----------------------------------|------------------------------------------------------------------------------------------------------------------------------------------------------------------------------------------------------------------------------------------------------------------------------------------------------------------------------------------------------------------------------------------------------------------------------------------------------------------------------------------------------------------------------------------------------------------------------------|
|   | Relevant publications            | 2) <a href="ftp://ftp.cmdl.noaa.gov/hats/ocean/Ocean%20GCMS%20Data%201994-2004/Message%20to%20potential%20users%20of%20these%20data%20(31%20Aug%202005).pdf">ftp://ftp.cmdl.noaa.gov/hats/ocean/Ocean%20GCMS%20Data%201994-2004/Message%20to%20potential%20users%20of%20these%20data%20(31%20Aug%202005).pdf</a>                                                                                                                                                                                                                                                                   |
|   | Sampling technique               | equilibrator (trapping of gases from equilibrated seawater and air on adsorbents)                                                                                                                                                                                                                                                                                                                                                                                                                                                                                                  |
|   | Analysis and detection technique | Gas chromatography / mass spectrometer (GC/MS) (HCFC-22, CFC-12, CH <sub>3</sub> Cl, CFC-114, Halon-1211, CH <sub>3</sub> Br, CFC-11, CH <sub>3</sub> I, Isoprene, CFC-113, CH <sub>2</sub> Cl <sub>2</sub> , CH <sub>2</sub> BrCl, CHCl <sub>3</sub> , CH <sub>3</sub> CCl <sub>3</sub> , C <sub>6</sub> H <sub>6</sub> , CCl <sub>4</sub> , C <sub>2</sub> HCl <sub>3</sub> , CH <sub>2</sub> Br <sub>2</sub> , CH <sub>2</sub> ICl, C <sub>7</sub> H <sub>8</sub> , CHBr <sub>2</sub> Cl, C <sub>2</sub> Cl <sub>4</sub> , CHBr <sub>3</sub> , CH <sub>2</sub> I <sub>2</sub> ) |
|   | Calibration technique            | Gas standard, <a href="ftp://ftp.cmdl.noaa.gov/hats/ocean/Ocean%20GCMS%20Data%201994-2004/Message%20to%20potential%20users%20of%20these%20data%20(31%20Aug%202005).pdf">ftp://ftp.cmdl.noaa.gov/hats/ocean/Ocean%20GCMS%20Data%201994-2004/Message%20to%20potential%20users%20of%20these%20data%20(31%20Aug%202005).pdf</a>                                                                                                                                                                                                                                                        |
|   | Standard referred to             | NOAA scale                                                                                                                                                                                                                                                                                                                                                                                                                                                                                                                                                                         |
| 8 | Platform type and name           | Ship, Meteor                                                                                                                                                                                                                                                                                                                                                                                                                                                                                                                                                                       |
|   | Expedition name                  | M55                                                                                                                                                                                                                                                                                                                                                                                                                                                                                                                                                                                |
|   | Cruise start date (UTC)          | 10/12/2002 0:00                                                                                                                                                                                                                                                                                                                                                                                                                                                                                                                                                                    |
|   | EXPOCODE                         | 06M320021012                                                                                                                                                                                                                                                                                                                                                                                                                                                                                                                                                                       |
|   | Dataset creator                  | James Butler                                                                                                                                                                                                                                                                                                                                                                                                                                                                                                                                                                       |
|   | PI contact details               | James Butler, NOAA, james.h.butler@noaa.gov                                                                                                                                                                                                                                                                                                                                                                                                                                                                                                                                        |
|   | Data set origin                  | Mail submission: Birgit Quack, bquack@geomar.de, 08.2010                                                                                                                                                                                                                                                                                                                                                                                                                                                                                                                           |
| 9 | Platform type and name           | Ship, RHaMBLe cruise (RRS Discovery cruise 319)                                                                                                                                                                                                                                                                                                                                                                                                                                                                                                                                    |
|   | Cruise start date (UTC)          | 5/20/2007 0:00                                                                                                                                                                                                                                                                                                                                                                                                                                                                                                                                                                     |
|   | EXPOCODE                         | 74DI20070520                                                                                                                                                                                                                                                                                                                                                                                                                                                                                                                                                                       |
|   | Dataset creator                  | Charlotte Jones                                                                                                                                                                                                                                                                                                                                                                                                                                                                                                                                                                    |
|   | PI contact details               | Lucy Carpenter, Department of Chemistry, University of York, ljc4@york.ac.uk                                                                                                                                                                                                                                                                                                                                                                                                                                                                                                       |
|   | Data set origin                  | Host data centre: BODC ( <a href="http://www.bodc.ac.uk/projects/uk/uksolas/data_inventories/cruise/d319/">http://www.bodc.ac.uk/projects/uk/uksolas/data_inventories/cruise/d319/</a> )<br>Mail submission: Charlotte Jones, cej103@york.ac.uk, 10/2010                                                                                                                                                                                                                                                                                                                           |
|   | Relevant publications            | Jones, CE et al. Quantifying the contribution of marine organic gases to atmospheric iodine, Geophys Res Lett, 3, L18804, 2010; Carpenter, LJ et al. Air-sea fluxes of biogenic bromine from the tropical and North Atlantic Ocean, Atmos. Chem. Phys., 9, 5, 1805-1816, 2009                                                                                                                                                                                                                                                                                                      |
|   | Sampling technique               | air pump/pre-concentration and purge and trap                                                                                                                                                                                                                                                                                                                                                                                                                                                                                                                                      |
|   | Analysis and detection technique | GC/MS                                                                                                                                                                                                                                                                                                                                                                                                                                                                                                                                                                              |
|   | Calibration technique            | permeation oven / in-house halocarbon standard                                                                                                                                                                                                                                                                                                                                                                                                                                                                                                                                     |
|   | Standard referred to             | in house (Wevill & Carpenter, 2004)                                                                                                                                                                                                                                                                                                                                                                                                                                                                                                                                                |

|           |                                  |                                                                                                                                                                                                                                                                        |
|-----------|----------------------------------|------------------------------------------------------------------------------------------------------------------------------------------------------------------------------------------------------------------------------------------------------------------------|
| <b>10</b> | Platform type and name           | Ship, Marine Aerosol Production (MAP) cruise                                                                                                                                                                                                                           |
|           | Cruise start date (UTC)          | 6/11/2006 0:00                                                                                                                                                                                                                                                         |
|           | Dataset creator                  | Charlotte Jones                                                                                                                                                                                                                                                        |
|           | PI contact details               | Lucy Carpenter, Department of Chemistry, University of York, email ljc4@york.ac.uk                                                                                                                                                                                     |
|           | Data set origin                  | Mail submission: Charlotte Jones, cej103@york.ac.uk, 10/2010                                                                                                                                                                                                           |
|           | Relevant publications            | Carpenter, L. J., Jones, C. E., Dunk, R. M., Hornsby, K. E. and Woeltjen, J.: Air-sea fluxes of biogenic bromine from the tropical and North Atlantic Ocean, Atmos. Chem. Phys., 9, 5, 1805-1816, 2009                                                                 |
|           | Sampling technique               | air pump/pre-concentration and purge and trap                                                                                                                                                                                                                          |
|           | Analysis and detection technique | GC/MS                                                                                                                                                                                                                                                                  |
|           | Calibration technique            | permeation oven / in-house halocarbon standard                                                                                                                                                                                                                         |
| <b>11</b> | Standard referred to             | In house (Wevill & Carpenter, 2004)                                                                                                                                                                                                                                    |
|           | Platform type and name           | Ship, Tangaroa                                                                                                                                                                                                                                                         |
|           | Platform name                    | Tangaroa                                                                                                                                                                                                                                                               |
|           | Cruise start date (UTC)          | 11/21/2010                                                                                                                                                                                                                                                             |
|           | EXPOCODE                         | 61TG20101121                                                                                                                                                                                                                                                           |
|           | Dataset creator                  | Neil Harris / Andrew Robinson                                                                                                                                                                                                                                          |
|           | PI contact details               | Neil Harris, Univ. of Cambridge, Neil.Harris@ozone-sec.ch.cam.ac.uk                                                                                                                                                                                                    |
|           | Sampling technique               | GC-ECD (Dirac)                                                                                                                                                                                                                                                         |
|           | Calibration technique            | NOAA-ERSL calibration scale                                                                                                                                                                                                                                            |
| <b>12</b> | Platform type and name           | Ship, R/V Poseidon                                                                                                                                                                                                                                                     |
|           | Expedition name                  | DRIVE                                                                                                                                                                                                                                                                  |
|           | EXPOCODE                         | 06PO20100531 / 06PO20100619                                                                                                                                                                                                                                            |
|           | Dataset creator                  | Elliot Atlas (air)                                                                                                                                                                                                                                                     |
|           | PI contact details               | Elliot Atlas, RSMAS, eatlas@rsmas.miami.edu                                                                                                                                                                                                                            |
|           | Data set origin                  | Mail submission: 18.08.2011, hhepach@ifm-geomar.de, Pangaea                                                                                                                                                                                                            |
|           | Sampling technique               | Air canister                                                                                                                                                                                                                                                           |
|           | Analysis and detection technique | GC/MS (SIM), Schauffler, S. M., E. L. Atlas, D. R. Blake, F. Flocke, R. A. Lueb, J. M. Lee-Taylor, V. Stroud, and W. Travnicek (1999), Distributions of brominated organic compounds in the troposphere and lower stratosphere, J. Geophys. Res., 104, 21,513– 21,535. |
|           | Calibration technique            | AED (atmospheric standard), NOAA scale                                                                                                                                                                                                                                 |



|           |                                  |                                                                                                                                                                                               |
|-----------|----------------------------------|-----------------------------------------------------------------------------------------------------------------------------------------------------------------------------------------------|
| <b>13</b> | Platform type and name           | Ship, R/V Alkor                                                                                                                                                                               |
|           | Expedition name                  | Field Study 2 (Fjord-Experiment, Kiel Bight and R/V Alkor)                                                                                                                                    |
|           | Cruise start date (UTC)          | 3/23/1992                                                                                                                                                                                     |
|           | EXPOCODE                         | 06A619920323                                                                                                                                                                                  |
|           | Dataset creator                  | Birgit Quack                                                                                                                                                                                  |
|           | PI contact details               | Birgit Quack, GEOMAR, bquack@geomar.de                                                                                                                                                        |
|           | Data set origin                  | Mail submission: B. Quack, bquack@geomar.de, 08/2010                                                                                                                                          |
|           | Relevant publications            | Quack, B., Volatile halogenated hydrocarbons in the marine atmosphere: Inventory, sources and mass balances over North Sea and Baltic, Ph.D. thesis, GEOMAR, Univ. Kiel, Kiel, Germany, 1994. |
|           | Sampling technique               | adsorbtion tubes                                                                                                                                                                              |
|           | Analysis and detection technique | analysis with thermo desorption GC-ECD                                                                                                                                                        |
| <b>14</b> | Calibration technique            | liquid standards                                                                                                                                                                              |
|           | Platform type and name           | Ship, R/V Alkor                                                                                                                                                                               |
|           | Expedition name                  | Field study 3 (Baltic, R/V Alkor)                                                                                                                                                             |
|           | Cruise start date (UTC)          | 6/30/1992 11:00                                                                                                                                                                               |
|           | Dataset creator                  | Birgit Quack                                                                                                                                                                                  |
|           | PI contact details               | Birgit Quack, GEOMAR, bquack@geomar.de                                                                                                                                                        |
|           | Data set origin                  | Mail submission: B. Quack, bquack@geomar.de, 08/2010                                                                                                                                          |
|           | Relevant publications            | Quack, B., Volatile halogenated hydrocarbons in the marine atmosphere: Inventory, sources and mass balances over North Sea and Baltic, Ph.D. thesis, GEOMAR, Univ. Kiel, Kiel, Germany, 1994. |
|           | Sampling technique               | adsorbtion tubes                                                                                                                                                                              |
|           | Analysis and detection technique | analysis with thermo desorption GC-ECD                                                                                                                                                        |
| <b>15</b> | Calibration technique            | liquid standards                                                                                                                                                                              |
|           | Platform name                    | Ship R/V Alkor                                                                                                                                                                                |
|           | Expedition name                  | Field study 4 (R/V Alkor: Baltic and North Sea)                                                                                                                                               |
|           | Cruise start date (UTC)          | 3/25/1991 18:36                                                                                                                                                                               |
|           | EXPOCODE                         | 06A619910325                                                                                                                                                                                  |
|           | Dataset creator                  | Birgit Quack                                                                                                                                                                                  |
|           | PI contact details               | Birgit Quack, GEOMAR, bquack@geomar.de                                                                                                                                                        |
|           | Data set origin                  | Mail submission: B. Quack, bquack@geomar.de, 08/2010                                                                                                                                          |

|           |                                  |                                                                                                                                                                                               |
|-----------|----------------------------------|-----------------------------------------------------------------------------------------------------------------------------------------------------------------------------------------------|
|           | Relevant publications            | Quack, B., Volatile halogenated hydrocarbons in the marine atmosphere: Inventory, sources and mass balances over North Sea and Baltic, Ph.D. thesis, GEOMAR, Univ. Kiel, Kiel, Germany, 1994. |
|           | Sampling technique               | adsorbtion tubes                                                                                                                                                                              |
|           | Analysis and detection technique | analysis with thermo desorption GC-ECD                                                                                                                                                        |
|           | Calibration technique            | liquid standards                                                                                                                                                                              |
| <b>16</b> | Platform type                    | Ship, R/V Alkor                                                                                                                                                                               |
|           | Expedition name                  | Field Study 5 (North Sea Experiment): Central North Sea (R/V Alkor)                                                                                                                           |
|           | Cruise start date (UTC)          | 9/16/1991 21:30                                                                                                                                                                               |
|           | EXPOCODE                         | 06A619910916                                                                                                                                                                                  |
|           | Dataset creator                  | Birgit Quack                                                                                                                                                                                  |
|           | PI contact details               | Birgit Quack, GEOMAR, bquack@geomar.de                                                                                                                                                        |
|           | Data set origin                  | Mail submission: B. Quack, bquack@geomar.de, 08/2010                                                                                                                                          |
|           | Relevant publications            | Quack, B., Volatile halogenated hydrocarbons in the marine atmosphere: Inventory, sources and mass balances over North Sea and Baltic, Ph.D. thesis, GEOMAR, Univ. Kiel, Kiel, Germany, 1994. |
|           | Sampling technique               | adsorbtion tubes                                                                                                                                                                              |
|           | Analysis and detection technique | analysis with thermo desorption GC-ECD                                                                                                                                                        |
|           | Calibration technique            | liquid standards                                                                                                                                                                              |
| <b>17</b> | Platform type and name           | Ship, R/V Belgica                                                                                                                                                                             |
|           | Expedition name                  | Field Study 5 (North Sea Experiment): Central North Sea (R/V Belgica)                                                                                                                         |
|           | Cruise start date (UTC)          | 9/16/1991 20:40                                                                                                                                                                               |
|           | EXPOCODE                         | 11BE19910916                                                                                                                                                                                  |
|           | Dataset creator                  | Birgit Quack                                                                                                                                                                                  |
|           | PI contact details               | Birgit Quack, GEOMAR, bquack@geomar.de                                                                                                                                                        |
|           | Data set origin                  | Mail submission: B. Quack, bquack@geomar.de, 08/2010                                                                                                                                          |

|           |                                  |                                                                                                                                                                                               |
|-----------|----------------------------------|-----------------------------------------------------------------------------------------------------------------------------------------------------------------------------------------------|
|           | Relevant publications            | Quack, B., Volatile halogenated hydrocarbons in the marine atmosphere: Inventory, sources and mass balances over North Sea and Baltic, Ph.D. thesis, GEOMAR, Univ. Kiel, Kiel, Germany, 1994. |
|           | Sampling technique               | adsorbtion tubes                                                                                                                                                                              |
|           | Analysis and detection technique | analysis with thermo desorption GC-ECD                                                                                                                                                        |
|           | Calibration technique            | liquid standards                                                                                                                                                                              |
| <b>18</b> | Platform type and name           | Platform, Research Platform North Sea                                                                                                                                                         |
|           | Expedition name                  | Field Study 5 (North Sea Experiment): Research Platform North Sea                                                                                                                             |
|           | Cruise start date (UTC)          | 9/16/1991 0:00                                                                                                                                                                                |
|           | Dataset creator                  | Birgit Quack                                                                                                                                                                                  |
|           | PI contact details               | Birgit Quack, GEOMAR, bquack@geomar.de                                                                                                                                                        |
|           | Data set origin                  | Mail submission: B. Quack, bquack@geomar.de, 08/2010                                                                                                                                          |
|           | Relevant publications            | Quack, B., Volatile halogenated hydrocarbons in the marine atmosphere: Inventory, sources and mass balances over North Sea and Baltic, Ph.D. thesis, GEOMAR, Univ. Kiel, Kiel, Germany, 1994. |
|           | Mail submission                  | B. Quack, bquack@geomar.de, 08/2010                                                                                                                                                           |
|           | Sampling technique               | adsorbtion tubes                                                                                                                                                                              |
|           | Analysis and detection technique | analysis with thermo desorption GC-ECD                                                                                                                                                        |
|           | Calibration technique            | liquid standards                                                                                                                                                                              |
| <b>19</b> | Platform type and name           | Coastal Observations, Schweinebucht, Hörnum, Basaltbogen, List, Westerland, Nordostseite (Sylt, Germany)                                                                                      |
|           | Expedition name                  | Field study 6 (Coast of eastern North Sea: Island Sylt)                                                                                                                                       |
|           | Cruise start date (UTC)          | 6/4/1991 9:00                                                                                                                                                                                 |
|           | Dataset creator                  | Birgit Quack                                                                                                                                                                                  |
|           | PI contact details               | Birgit Quack, GEOMAR, bquack@geomar.de                                                                                                                                                        |
|           | Data set origin                  | Mail submission: B. Quack, bquack@geomar.de, 08/2010                                                                                                                                          |

|           |                                  |                                                                                                                                                                                               |
|-----------|----------------------------------|-----------------------------------------------------------------------------------------------------------------------------------------------------------------------------------------------|
|           | Relevant publications            | Quack, B., Volatile halogenated hydrocarbons in the marine atmosphere: Inventory, sources and mass balances over North Sea and Baltic, Ph.D. thesis, GEOMAR, Univ. Kiel, Kiel, Germany, 1994. |
|           | Sampling technique               | adsorbtion tubes                                                                                                                                                                              |
|           | Analysis and detection technique | analysis with thermo desorption GC-ECD                                                                                                                                                        |
|           | Calibration technique            | liquid standards                                                                                                                                                                              |
| <b>20</b> | Platform type and name           | Coastal Observations, Gothenborg, Gothenborg Harbour, Särö-Peninsula                                                                                                                          |
|           | Expedition name                  | Field Study 7 (Swedish West Coast)                                                                                                                                                            |
|           | Cruise start date (UTC)          | 7/16/1991 8:00                                                                                                                                                                                |
|           | Dataset creator                  | Birgit Quack                                                                                                                                                                                  |
|           | PI contact details               | Birgit Quack, GEOMAR, bquack@geomar.de                                                                                                                                                        |
|           | Data set origin                  | Mail submission: B. Quack, bquack@geomar.de, 08/2010                                                                                                                                          |
|           | Relevant publications            | Quack, B., Volatile halogenated hydrocarbons in the marine atmosphere: Inventory, sources and mass balances over North Sea and Baltic, Ph.D. thesis, GEOMAR, Univ. Kiel, Kiel, Germany, 1994. |
|           | Sampling technique               | adsorbtion tubes                                                                                                                                                                              |
|           | Analysis and detection technique | analysis with thermo desorption GC-ECD                                                                                                                                                        |
|           | Calibration technique            | liquid standards                                                                                                                                                                              |
| <b>21</b> | Platform type and name           | Ship, Oden (Ice - Breaker)                                                                                                                                                                    |
|           | Expedition name                  | Field study 8 (Arctic Ocean)                                                                                                                                                                  |
|           | Cruise start date (UTC)          | 8/4/1991 21:48                                                                                                                                                                                |
|           | EXPOCODE                         | 77DN19910804                                                                                                                                                                                  |
|           | Dataset creator                  | Birgit Quack                                                                                                                                                                                  |
|           | PI contact details               | Birgit Quack, GEOMAR, bquack@geomar.de                                                                                                                                                        |
|           | Data set origin                  | Mail submission: B. Quack, bquack@geomar.de, 08/2010                                                                                                                                          |

|           |                                  |                                                                                                                                                                                               |
|-----------|----------------------------------|-----------------------------------------------------------------------------------------------------------------------------------------------------------------------------------------------|
|           | Relevant publications            | Quack, B., Volatile halogenated hydrocarbons in the marine atmosphere: Inventory, sources and mass balances over North Sea and Baltic, Ph.D. thesis, GEOMAR, Univ. Kiel, Kiel, Germany, 1994. |
|           | Sampling technique               | adsorbtion tubes                                                                                                                                                                              |
|           | Analysis and detection technique | analysis with thermo desorption GC-ECD                                                                                                                                                        |
|           | Calibration technique            | liquid standards                                                                                                                                                                              |
| <b>22</b> | Platform type and name           | ship, Meteor                                                                                                                                                                                  |
|           | Expedition name                  | M60_5 (Fort-de-France - Lisbon, 09.03.-15.04.2004)                                                                                                                                            |
|           | Cruise start date (UTC)          | 3/9/2004                                                                                                                                                                                      |
|           | Dataset creator                  | Birgit Quack                                                                                                                                                                                  |
|           | PI contact details               | Birgit Quack, GEOMAR, bquack@geomar.de                                                                                                                                                        |
|           | Data set origin                  | Mail submission: B. Quack, bquack@geomar.de, 08/2010                                                                                                                                          |
|           | Sampling technique               | air: online from bow on cooled (-70°C) glas beads                                                                                                                                             |
|           | Analysis and detection technique | GC/MS (SIM), air: thermal desorption off adsorbent                                                                                                                                            |
|           | Calibration technique            | liquid standard (volumetrically prepared in methanol)                                                                                                                                         |
| <b>23</b> | Platform type and name           | Coastal Observation, Westerhever (Germany)                                                                                                                                                    |
|           | Expedition name                  | Nordsee-Experiment (NOSE) (East Coast of North Sea (Westerhever Wadden Sea))                                                                                                                  |
|           | Cruise start date (UTC)          | 9/16/1991 18:10                                                                                                                                                                               |
|           | Dataset creator                  | Birgit Quack                                                                                                                                                                                  |
|           | PI contact details               | Birgit Quack, GEOMAR, bquack@geomar.de                                                                                                                                                        |
|           | Data set origin                  | Mail submission: B. Quack, bquack@geomar.de, 08/2010                                                                                                                                          |
|           | Relevant publications            | Quack, B., Volatile halogenated hydrocarbons in the marine atmosphere: Inventory, sources and mass balances over North Sea and Baltic, Ph.D. thesis, GEOMAR, Univ. Kiel, Kiel, Germany, 1994. |
|           | Sampling technique               | adsorbtion tubes                                                                                                                                                                              |
|           | Analysis and detection technique | analysis with thermo desorption GC-ECD                                                                                                                                                        |
|           | Calibration technique            | liquid standards                                                                                                                                                                              |

|    |                                  |                                                                                                                                                                                                                                                                                                                                                                                                                                                                     |
|----|----------------------------------|---------------------------------------------------------------------------------------------------------------------------------------------------------------------------------------------------------------------------------------------------------------------------------------------------------------------------------------------------------------------------------------------------------------------------------------------------------------------|
| 24 | Platform type and name           | Coastal Observation, Westerland (Sylt, Germany)                                                                                                                                                                                                                                                                                                                                                                                                                     |
|    | Expedition name                  | Nordsee-Experiment (NOSE) (East Coast of North Sea (Island Sylt))                                                                                                                                                                                                                                                                                                                                                                                                   |
|    | Cruise start date (UTC)          | 9/16/1991 9:45                                                                                                                                                                                                                                                                                                                                                                                                                                                      |
|    | Dataset creator                  | Birgit Quack                                                                                                                                                                                                                                                                                                                                                                                                                                                        |
|    | PI contact details               | Birgit Quack, GEOMAR, bquack@geomar.de                                                                                                                                                                                                                                                                                                                                                                                                                              |
|    | Data set origin                  | Mail submission: B. Quack, bquack@geomar.de, 08/2010                                                                                                                                                                                                                                                                                                                                                                                                                |
|    | Relevant publications            | Quack, B., Volatile halogenated hydrocarbons in the marine atmosphere: Inventory, sources and mass balances over North Sea and Baltic, Ph.D. thesis, GEOMAR, Univ. Kiel, Kiel, Germany, 1994.                                                                                                                                                                                                                                                                       |
|    | Sampling technique               | adsorbtion tubes                                                                                                                                                                                                                                                                                                                                                                                                                                                    |
|    | Analysis and detection technique | analysis with thermo desorption GC-ECD                                                                                                                                                                                                                                                                                                                                                                                                                              |
| 25 | Calibration technique            | liquid standards                                                                                                                                                                                                                                                                                                                                                                                                                                                    |
|    | Platform type and name           | Ship, Poseidon                                                                                                                                                                                                                                                                                                                                                                                                                                                      |
|    | Expedition name                  | P320_1 (Las Palmas - Mindelo, 21.03.2005-07.04.2005)                                                                                                                                                                                                                                                                                                                                                                                                                |
|    | Cruise start date (UTC)          | 3/21/2005 0:00                                                                                                                                                                                                                                                                                                                                                                                                                                                      |
|    | EXPOCODE                         | 06PO20050321                                                                                                                                                                                                                                                                                                                                                                                                                                                        |
|    | Dataset creator                  | Birgit Quack                                                                                                                                                                                                                                                                                                                                                                                                                                                        |
|    | PI contact details               | Elliot Atlas , RSMAS, eatlas@rsmas.miami.edu                                                                                                                                                                                                                                                                                                                                                                                                                        |
|    | Data set origin                  | Mail submission: B. Quack, bquack@geomar.de, 08/2010                                                                                                                                                                                                                                                                                                                                                                                                                |
|    | Relevant publications            | 1) Quack, B., Peeken, I., Petrick, G., and Nachtigall, K. (2007), Oceanic distribution and sources of bromoform and dibromomethane in the Mauritanian upwelling, J. Geophys. Res., 112, C10006, doi:10.1029/2006JC003803<br>2) Quack, B., E. Atlas, G. Petrick, and D. W. R. Wallace (2007), Bromoform and dibromomethane above the Mauritanian upwelling: Atmospheric distributions and oceanic emissions, J. Geophys. Res., 112, D09312, doi:10.1029/2006JD007614 |

|           |                                  |                                                                                                                                                                                                                                                                        |
|-----------|----------------------------------|------------------------------------------------------------------------------------------------------------------------------------------------------------------------------------------------------------------------------------------------------------------------|
|           | Sampling technique               | stainless steel air canisters                                                                                                                                                                                                                                          |
|           | Analysis and detection technique | GC/MS (SIM), Schauffler, S. M., E. L. Atlas, D. R. Blake, F. Flocke, R. A. Lueb, J. M. Lee-Taylor, V. Stroud, and W. Travnicek (1999), Distributions of brominated organic compounds in the troposphere and lower stratosphere, J. Geophys. Res., 104, 21,513– 21,535. |
|           | Calibration technique            | AED (atmospheric standard)                                                                                                                                                                                                                                             |
|           | Standard referred to             | RSMAS scale                                                                                                                                                                                                                                                            |
| <b>26</b> | Platform type and name           | Ship, F.S. Polarstern                                                                                                                                                                                                                                                  |
|           | Expedition name                  | ANT VI/2                                                                                                                                                                                                                                                               |
|           | Cruise start date (UTC)          | 10/26/1987                                                                                                                                                                                                                                                             |
|           | EXPOCODE                         | 06AQ19871026                                                                                                                                                                                                                                                           |
|           | Dataset creator                  | Werner Reifenhäuser                                                                                                                                                                                                                                                    |
|           | PI contact details               | W. Reifenhäuser, Bayrisches Staatsministerium fuer Umwelt und Gesundheit,<br>Werner.Reifenhaeuser@stmug.bayern.de                                                                                                                                                      |
|           | Relevant publications            | Gaschromatische Bestimmung halogenierter Kohlenwasserstoffe in der antarktischen Atmosphäre, in südpolaren Gewässern sowie in anthropogen belasteter Luft, Dissertation von 1989                                                                                       |
|           | Analysis and detection technique | gaschromatographical separation technique                                                                                                                                                                                                                              |
|           | Calibration technique            | weighing out the halocarbons in ethylenglycol . Calibration filled in glas bulbs and closed with Teflon adapter                                                                                                                                                        |

|           |                                  |                                                                                                                                     |
|-----------|----------------------------------|-------------------------------------------------------------------------------------------------------------------------------------|
| <b>27</b> | Platform type and name           | Ship, Meteor                                                                                                                        |
|           | Expedition name                  | M55                                                                                                                                 |
|           | Cruise start date (UTC)          | 10/12/2002 0:00                                                                                                                     |
|           | EXPOCODE                         | 06M320021012                                                                                                                        |
|           | Dataset creator                  | Jonathan Williams                                                                                                                   |
|           | PI contact details               | Jonathan Williams, Max Planck Institut für Chemie, Mainz, williams@mpch-mainz.mpg.de                                                |
| <b>28</b> | Platform type and name           | Coastal Observations, San Cristóbal Island, Galápagos Islands, Ecuador                                                              |
|           | Cruise start date (UTC)          | 2/28/2002                                                                                                                           |
|           | Dataset creator                  | Yoko Yokouchi                                                                                                                       |
|           | PI contact details               | Yoko Yokouchi, NIES, yokouchi@nies.go.jp                                                                                            |
|           | Data set origin                  | Mail submission: Yoko Yokouchi,yokouchi@nies.go.jp, March 2010                                                                      |
|           | Relevant publications            | 1) J. Geophys. Res., 110, D23309, 2005, doi:10.1029/2005JD006303<br>2) J. Geophys. Res., 113, D18311,2008, doi:10.1029/2008JD009861 |
|           | Sampling technique               | Canister                                                                                                                            |
|           | Analysis and detection technique | Preconcentration/GC-MS                                                                                                              |
| <b>29</b> | Standard referred to             | Gravimetrically prepared standard gas                                                                                               |
|           | Platform type and name           | Ship, R/V Mirai (MR02 - K06)                                                                                                        |
|           | Cruise start date (UTC)          | 1/14/2003 23:41                                                                                                                     |
|           | EXPOCODE                         | 49NZ20030114                                                                                                                        |
|           | Dataset creator                  | Yoko Yokouchi                                                                                                                       |
|           | PI contact details               | Yoko Yokouchi, NIES, yokouchi@nies.go.jp                                                                                            |
|           | Data set origin                  | Mail submission: Yoko Yokouchi,yokouchi@nies.go.jp, March 2010                                                                      |
|           | Relevant publications            | 1) J. Geophys. Res., 110, D23309, 2005, doi:10.1029/2005JD006303<br>2) J. Geophys. Res., 113, D18311,2008, doi:10.1029/2008JD009861 |
|           | Sampling technique               | Canister                                                                                                                            |
|           | Analysis and detection technique | Preconcentration/GC-MS                                                                                                              |
|           | Standard referred to             | Gravimetrically prepared standard gas                                                                                               |



|           |                                  |                                                                                                                                     |
|-----------|----------------------------------|-------------------------------------------------------------------------------------------------------------------------------------|
| <b>30</b> | Platform type and name           | Coastal Observations, Java Island (Indonesia)                                                                                       |
|           | Cruise start date (UTC)          | 1/17/2003 7:30                                                                                                                      |
|           | Dataset creator                  | Yoko Yokouchi                                                                                                                       |
|           | PI contact details               | Yoko Yokouchi, NIES, yokouchi@nies.go.jp                                                                                            |
|           | Data set origin                  | Mail submission: Yoko Yokouchi,yokouchi@nies.go.jp, March 2010                                                                      |
|           | Relevant publications            | 1) J. Geophys. Res., 110, D23309, 2005, doi:10.1029/2005JD006303<br>2) J. Geophys. Res., 113, D18311,2008, doi:10.1029/2008JD009861 |
|           | Sampling technique               | Canister                                                                                                                            |
|           | Analysis and detection technique | Preconcentration/GC-MS                                                                                                              |
| <b>31</b> | Standard referred to             | Gravimetrically prepared standard gas                                                                                               |
|           | Platform type and name           | Coastal Observations, Christmas Island (Australia)                                                                                  |
|           | Cruise start date (UTC)          | 1/21/2003 0:37                                                                                                                      |
|           | Dataset creator                  | Yoko Yokouchi                                                                                                                       |
|           | PI contact details               | Yoko Yokouchi, NIES, yokouchi@nies.go.jp                                                                                            |
|           | Data set origin                  | Mail submission: Yoko Yokouchi,yokouchi@nies.go.jp, March 2010                                                                      |
|           | Relevant publications            | 1) J. Geophys. Res., 110, D23309, 2005, doi:10.1029/2005JD006303<br>2) J. Geophys. Res., 113, D18311,2008, doi:10.1029/2008JD009861 |
|           | Sampling technique               | Canister                                                                                                                            |
| <b>32</b> | Analysis and detection technique | Preconcentration/GC-MS                                                                                                              |
|           | Standard referred to             | Gravimetrically prepared standard gas                                                                                               |
|           | Platform type and name           | Ship, R/V Mirai (MR02-K01)                                                                                                          |
|           | Cruise start date (UTC)          | 2/24/2002 23:57                                                                                                                     |
|           | EXPOCODE                         | 49NZ20020224                                                                                                                        |
|           | Dataset creator                  | Yoko Yokouchi                                                                                                                       |
|           | PI contact details               | Yoko Yokouchi, NIES, yokouchi@nies.go.jp                                                                                            |
|           | Data set origin                  | Mail submission: Yoko Yokouchi,yokouchi@nies.go.jp, March 2010                                                                      |

|           |                                  |                                                                                                                                      |
|-----------|----------------------------------|--------------------------------------------------------------------------------------------------------------------------------------|
|           | Relevant publications            | 1) J. Geophys. Res., 110, D23309, 2005, doi:10.1029/2005JD006303<br>2) J. Geophys. Res., 113, D18311, 2008, doi:10.1029/2008JD009861 |
|           | Sampling technique               | Canister                                                                                                                             |
|           | Analysis and detection technique | Preconcentration/GC-MS                                                                                                               |
|           | Standard referred to             | Gravimetrically prepared standard gas                                                                                                |
| <b>33</b> | Platform type and name           | Coastal Observations, Rishiri Island (Japan)                                                                                         |
|           | Cruise start date (UTC)          | 9/14/2003 5:30                                                                                                                       |
|           | Dataset creator                  | Yoko Yokouchi                                                                                                                        |
|           | PI contact details               | Yoko Yokouchi, NIES, yokouchi@nies.go.jp                                                                                             |
|           | Data set origin                  | Mail submission: Yoko Yokouchi, yokouchi@nies.go.jp, March 2010                                                                      |
|           | Relevant publications            | 1) J. Geophys. Res., 110, D23309, 2005, doi:10.1029/2005JD006303<br>2) J. Geophys. Res., 113, D18311, 2008, doi:10.1029/2008JD009861 |
|           | Sampling technique               | Canister                                                                                                                             |
|           | Analysis and detection technique | Preconcentration/GC-MS                                                                                                               |
|           | Standard referred to             | Gravimetrically prepared standard gas                                                                                                |
| <b>34</b> | Platform type and name           | Coastal Observations, Syowa Station (Antarctica)                                                                                     |
|           | Cruise start date (UTC)          | 2/22/2004 16:32                                                                                                                      |
|           | Dataset creator                  | Yoko Yokouchi                                                                                                                        |
|           | PI contact details               | Yoko Yokouchi, NIES, yokouchi@nies.go.jp                                                                                             |
|           | Data set origin                  | Mail submission: Yoko Yokouchi, yokouchi@nies.go.jp, March 2010                                                                      |
|           | Relevant publications            | 1) J. Geophys. Res., 110, D23309, 2005, doi:10.1029/2005JD006303<br>2) J. Geophys. Res., 113, D18311, 2008, doi:10.1029/2008JD009861 |
|           | Sampling technique               | Canister                                                                                                                             |
|           | Analysis and detection technique | Preconcentration/GC-MS                                                                                                               |
|           | Standard referred to             | Gravimetrically prepared standard gas                                                                                                |

|           |                                  |                                                                                                                                     |
|-----------|----------------------------------|-------------------------------------------------------------------------------------------------------------------------------------|
| <b>35</b> | Platform type and name           | Coastal Observations, Alert (Canada)                                                                                                |
|           | Platform name                    | Alert, Canada                                                                                                                       |
|           | Expedition name                  | NIES Global Halocarbon Monitoring Project                                                                                           |
|           | Cruise start date (UTC)          | 1/3/2003 16:19                                                                                                                      |
|           | Dataset creator                  | Yoko Yokouchi                                                                                                                       |
|           | PI contact details               | Yoko Yokouchi, NIES, yokouchi@nies.go.jp                                                                                            |
|           | Data set origin                  | Mail submission: Yoko Yokouchi,yokouchi@nies.go.jp, March 2010                                                                      |
|           | Relevant publications            | 1) J. Geophys. Res., 110, D23309, 2005, doi:10.1029/2005JD006303<br>2) J. Geophys. Res., 113, D18311,2008, doi:10.1029/2008JD009861 |
|           | Sampling technique               | Canister                                                                                                                            |
| <b>36</b> | Analysis and detection technique | Preconcentration/GC-MS                                                                                                              |
|           | Standard referred to             | Gravimetrically prepared standard gas                                                                                               |
|           | Platform type and name           | Coastal Observations, Cape Ochiishi (Japan)                                                                                         |
|           | Expedition name                  | NIES Global Halocarbon Monitoring Project                                                                                           |
|           | Cruise start date (UTC)          | 1/22/2003 4:13                                                                                                                      |
|           | Dataset creator                  | Yoko Yokouchi                                                                                                                       |
|           | PI contact details               | Yoko Yokouchi, NIES, yokouchi@nies.go.jp                                                                                            |
|           | Data set origin                  | Mail submission: Yoko Yokouchi,yokouchi@nies.go.jp, March 2010                                                                      |
|           | Relevant publications            | 1) J. Geophys. Res., 110, D23309, 2005, doi:10.1029/2005JD006303<br>2) J. Geophys. Res., 113, D18311,2008, doi:10.1029/2008JD009861 |
|           | Sampling technique               | Canister                                                                                                                            |
|           | Analysis and detection technique | Preconcentration/GC-MS                                                                                                              |
|           | Standard referred to             | Gravimetrically prepared standard gas                                                                                               |

|           |                                  |                                                                                                                                     |
|-----------|----------------------------------|-------------------------------------------------------------------------------------------------------------------------------------|
| <b>37</b> | Platform type and name           | Ship, Fuji Transworld                                                                                                               |
|           | Expedition name                  | NIES Global Halocarbon Monitoring Project                                                                                           |
|           | Cruise start date (UTC)          | 2/15/2003 15:25                                                                                                                     |
|           | Dataset creator                  | Yoko Yokouchi                                                                                                                       |
|           | PI contact details               | Yoko Yokouchi, NIES, yokouchi@nies.go.jp                                                                                            |
|           | Data set origin                  | Mail submission: Yoko Yokouchi,yokouchi@nies.go.jp, March 2010                                                                      |
|           | Relevant publications            | 1) J. Geophys. Res., 110, D23309, 2005, doi:10.1029/2005JD006303<br>2) J. Geophys. Res., 113, D18311,2008, doi:10.1029/2008JD009861 |
|           | Sampling technique               | Canister                                                                                                                            |
|           | Analysis and detection technique | Preconcentration/GC-MS                                                                                                              |
| <b>38</b> | Standard referred to             | Gravimetrically prepared standard gas                                                                                               |
|           | Platform type and name           | Ship, Fuji Transworld                                                                                                               |
|           | Expedition name                  | NIES Global Halocarbon Monitoring Project                                                                                           |
|           | Cruise start date (UTC)          | 3/29/2003 2:42                                                                                                                      |
|           | Dataset creator                  | Yoko Yokouchi                                                                                                                       |
|           | PI contact details               | Yoko Yokouchi, NIES, yokouchi@nies.go.jp                                                                                            |
|           | Data set origin                  | Mail submission: Yoko Yokouchi,yokouchi@nies.go.jp, March 2010                                                                      |
|           | Relevant publications            | 1) J. Geophys. Res., 110, D23309, 2005, doi:10.1029/2005JD006303<br>2) J. Geophys. Res., 113, D18311,2008, doi:10.1029/2008JD009861 |
|           | Sampling technique               | Canister                                                                                                                            |
| <b>39</b> | Analysis and detection technique | Preconcentration/GC-MS                                                                                                              |
|           | Standard referred to             | Gravimetrically prepared standard gas                                                                                               |
|           | Platform type and name           | Ship, Fuji Transworld                                                                                                               |
|           | Expedition name                  | NIES Global Halocarbon Monitoring Project                                                                                           |
|           | Cruise start date (UTC)          | 5/10/2003 2:44                                                                                                                      |
|           | Dataset creator                  | Yoko Yokouchi                                                                                                                       |
|           | PI contact details               | Yoko Yokouchi, NIES, yokouchi@nies.go.jp                                                                                            |
|           | Data set origin                  | Mail submission: Yoko Yokouchi,yokouchi@nies.go.jp, March 2010                                                                      |
|           |                                  |                                                                                                                                     |

|           |                                  |                                                                                                                                      |
|-----------|----------------------------------|--------------------------------------------------------------------------------------------------------------------------------------|
|           | Relevant publications            | 1) J. Geophys. Res., 110, D23309, 2005, doi:10.1029/2005JD006303<br>2) J. Geophys. Res., 113, D18311, 2008, 10.1029/2008JD009861     |
|           | Sampling technique               | Canister                                                                                                                             |
|           | Analysis and detection technique | Preconcentration/GC-MS                                                                                                               |
|           | Standard referred to             | Gravimetrically prepared standard gas                                                                                                |
| <b>40</b> | Platform type and name           | Ship, Fuji Transworld                                                                                                                |
|           | Expedition name                  | NIES Global Halocarbon Monitoring Project                                                                                            |
|           | Cruise start date (UTC)          | 6/21/2003 2:51                                                                                                                       |
|           | Dataset creator                  | Yoko Yokouchi                                                                                                                        |
|           | PI contact details               | Yoko Yokouchi, NIES, yokouchi@nies.go.jp                                                                                             |
|           | Data set origin                  | Mail submission: Yoko Yokouchi, yokouchi@nies.go.jp, March 2010                                                                      |
|           | Relevant publications            | 1) J. Geophys. Res., 110, D23309, 2005, doi:10.1029/2005JD006303<br>2) J. Geophys. Res., 113, D18311, 2008, doi:10.1029/2008JD009861 |
|           | Sampling technique               | Canister                                                                                                                             |
|           | Analysis and detection technique | Preconcentration/GC-MS                                                                                                               |
|           | Standard referred to             | Gravimetrically prepared standard gas                                                                                                |
| <b>41</b> | Platform type and name           | Ship, Fuji Transworld                                                                                                                |
|           | Expedition name                  | NIES Global Halocarbon Monitoring Project                                                                                            |
|           | Cruise start date (UTC)          | 8/2/2003 2:38                                                                                                                        |
|           | Dataset creator                  | Yoko Yokouchi                                                                                                                        |
|           | PI contact details               | Yoko Yokouchi, NIES, yokouchi@nies.go.jp                                                                                             |
|           | Data set origin                  | Mail submission: Yoko Yokouchi, yokouchi@nies.go.jp, March 2010                                                                      |
|           | Relevant publications            | 1) J. Geophys. Res., 110, D23309, 2005, doi:10.1029/2005JD006303<br>2) J. Geophys. Res., 113, D18311, 2008, doi:10.1029/2008JD009861 |
|           | Sampling technique               | Canister                                                                                                                             |
|           | Analysis and detection technique | Preconcentration/GC-MS                                                                                                               |
|           | Standard referred to             | Gravimetrically prepared standard gas                                                                                                |

|           |                                  |                                                                                                                                     |
|-----------|----------------------------------|-------------------------------------------------------------------------------------------------------------------------------------|
| <b>42</b> | Platform type and name           | Ship, Fuji Transworld                                                                                                               |
|           | Expedition name                  | NIES Global Halocarbon Monitoring Project                                                                                           |
|           | Cruise start date (UTC)          | 10/24/2003 4:00                                                                                                                     |
|           | Dataset creator                  | Yoko Yokouchi                                                                                                                       |
|           | PI contact details               | Yoko Yokouchi, NIES, yokouchi@nies.go.jp                                                                                            |
|           | Data set origin                  | Mail submission: Yoko Yokouchi,yokouchi@nies.go.jp, March 2010                                                                      |
|           | Relevant publications            | 1) J. Geophys. Res., 110, D23309, 2005, doi:10.1029/2005JD006303<br>2) J. Geophys. Res., 113, D18311,2008, doi:10.1029/2008JD009861 |
|           | Sampling technique               | Canister                                                                                                                            |
|           | Analysis and detection technique | Preconcentration/GC-MS                                                                                                              |
| <b>43</b> | Standard referred to             | Gravimetrically prepared standard gas                                                                                               |
|           | Platform type and name           | Ship, Fuji Transworld                                                                                                               |
|           | Expedition name                  | NIES Global Halocarbon Monitoring Project                                                                                           |
|           | Cruise start date (UTC)          | 12/4/2003 4:40                                                                                                                      |
|           | Dataset creator                  | Yoko Yokouchi                                                                                                                       |
|           | PI contact details               | Yoko Yokouchi, NIES, yokouchi@nies.go.jp                                                                                            |
|           | Data set origin                  | Mail submission: Yoko Yokouchi,yokouchi@nies.go.jp, March 2010                                                                      |
|           | Relevant publications            | 1) J. Geophys. Res., 110, D23309, 2005, doi:10.1029/2005JD006303<br>2) J. Geophys. Res., 113, D18311,2008, doi:10.1029/2008JD009861 |
|           | Sampling technique               | Canister                                                                                                                            |
| <b>44</b> | Analysis and detection technique | Preconcentration/GC-MS                                                                                                              |
|           | Standard referred to             | Gravimetrically prepared standard gas                                                                                               |
|           | Platform type and name           | Coastal Observations, Cape Grim, Australia                                                                                          |
|           | Expedition name                  | NIES Global Halocarbon Monitoring Project                                                                                           |
|           | Cruise start date (UTC)          | 1/14/2003 5:52                                                                                                                      |
|           | Dataset creator                  | Yoko Yokouchi                                                                                                                       |
|           | PI contact details               | Yoko Yokouchi, NIES, yokouchi@nies.go.jp                                                                                            |
|           | Data set origin                  | Mail submission: Yoko Yokouchi,yokouchi@nies.go.jp, March 2010                                                                      |

|           |                                  |                                                                                                                                      |
|-----------|----------------------------------|--------------------------------------------------------------------------------------------------------------------------------------|
|           | Relevant publications            | 1) J. Geophys. Res., 110, D23309, 2005, doi:10.1029/2005JD006303<br>2) J. Geophys. Res., 113, D18311, 2008, doi:10.1029/2008JD009861 |
|           | Sampling technique               | Canister                                                                                                                             |
|           | Analysis and detection technique | Preconcentration/GC-MS                                                                                                               |
|           | Standard referred to             | Gravimetrically prepared standard gas                                                                                                |
| <b>45</b> | Platform type and name           | Coastal Observations, Hateruma Island, Japan                                                                                         |
|           | Expedition name                  | NIES Global Halocarbon Monitoring Project                                                                                            |
|           | Cruise start date (UTC)          | 1/5/2003 7:15                                                                                                                        |
|           | Dataset creator                  | Yoko Yokouchi                                                                                                                        |
|           | PI contact details               | Yoko Yokouchi, NIES, yokouchi@nies.go.jp                                                                                             |
|           | Data set origin                  | Mail submission: Yoko Yokouchi, yokouchi@nies.go.jp, March 2010                                                                      |
|           | Relevant publications            | 1) J. Geophys. Res., 110, D23309, 2005, doi:10.1029/2005JD006303<br>2) J. Geophys. Res., 113, D18311, 2008, doi:10.1029/2008JD009861 |
|           | Sampling technique               | Canister                                                                                                                             |
|           | Analysis and detection technique | Preconcentration/GC-MS                                                                                                               |
|           | Standard referred to             | Gravimetrically prepared standard gas                                                                                                |
| <b>46</b> | Platform type and name           | Ship, M/S Pyxis                                                                                                                      |
|           | Expedition name                  | NIES Global Halocarbon Monitoring Project                                                                                            |
|           | Cruise start date (UTC)          | 1/9/2003 1:00                                                                                                                        |
|           | EXPOCODE                         | 49P120030109                                                                                                                         |
|           | Dataset creator                  | Yoko Yokouchi                                                                                                                        |
|           | PI contact details               | Yoko Yokouchi, NIES, yokouchi@nies.go.jp                                                                                             |
|           | Data set origin                  | Mail submission: Yoko Yokouchi, yokouchi@nies.go.jp, March 2010                                                                      |
|           | Relevant publications            | 1) J. Geophys. Res., 110, D23309, 2005, doi:10.1029/2005JD006303<br>2) J. Geophys. Res., 113, D18311, 2008, doi:10.1029/2008JD009861 |
|           | Sampling technique               | Canister                                                                                                                             |
|           | Analysis and detection technique | Preconcentration/GC-MS                                                                                                               |
|           | Standard referred to             | Gravimetrically prepared standard gas                                                                                                |

|           |                                  |                                                                                                                                     |
|-----------|----------------------------------|-------------------------------------------------------------------------------------------------------------------------------------|
| <b>47</b> | Platform type and name           | Ship, M/S Pyxis                                                                                                                     |
|           | Expedition name                  | NIES Global Halocarbon Monitoring Project                                                                                           |
|           | Cruise start date (UTC)          | 1/13/2005 3:00                                                                                                                      |
|           | EXPOCODE                         | 49P120050113                                                                                                                        |
|           | Dataset creator                  | Yoko Yokouchi                                                                                                                       |
|           | PI contact details               | Yoko Yokouchi, NIES, yokouchi@nies.go.jp                                                                                            |
|           | Data set origin                  | Mail submission: Yoko Yokouchi,yokouchi@nies.go.jp, March 2010                                                                      |
|           | Relevant publications            | 1) J. Geophys. Res., 110, D23309, 2005, doi:10.1029/2005JD006303<br>2) J. Geophys. Res., 113, D18311,2008, doi:10.1029/2008JD009861 |
|           | Analysis and detection technique | Preconcentration/GC-MS                                                                                                              |
| <b>48</b> | Standard referred to             | Gravimetrically prepared standard gas                                                                                               |
|           | Platform type and name           | Ship. M/S Pyxis                                                                                                                     |
|           | Expedition name                  | NIES Global Halocarbon Monitoring Project                                                                                           |
|           | Cruise start date (UTC)          | 1/20/2004 3:00                                                                                                                      |
|           | EXPOCODE                         | 49P120040120                                                                                                                        |
|           | Dataset creator                  | Yoko Yokouchi                                                                                                                       |
|           | PI contact details               | Yoko Yokouchi, NIES, yokouchi@nies.go.jp                                                                                            |
|           | Data set origin                  | Mail submission: Yoko Yokouchi,yokouchi@nies.go.jp, March 2010                                                                      |
|           | Relevant publications            | 1) J. Geophys. Res., 110, D23309, 2005, doi:10.1029/2005JD006303<br>2) J. Geophys. Res., 113, D18311,2008, doi:10.1029/2008JD009861 |
| <b>49</b> | Sampling technique               | Canister                                                                                                                            |
|           | Analysis and detection technique | Preconcentration/GC-MS                                                                                                              |
|           | Standard referred to             | Gravimetrically prepared standard gas                                                                                               |
|           | Platform type and name           | Ship, M/S Pyxis                                                                                                                     |
|           | Expedition name                  | NIES Global Halocarbon Monitoring Project                                                                                           |
|           | Cruise start date (UTC)          | 2/10/2003 2:00                                                                                                                      |
|           | EXPOCODE                         | 49P120030210                                                                                                                        |
|           | Dataset creator                  | Yoko Yokouchi                                                                                                                       |
|           |                                  |                                                                                                                                     |



|           |                                  |                                                                                                                                     |
|-----------|----------------------------------|-------------------------------------------------------------------------------------------------------------------------------------|
|           | PI contact details               | Yoko Yokouchi, NIES, yokouchi@nies.go.jp                                                                                            |
|           | Data set origin                  | Mail submission: Yoko Yokouchi,yokouchi@nies.go.jp, March 2010                                                                      |
|           | Relevant publications            | 1) J. Geophys. Res., 110, D23309, 2005, doi:10.1029/2005JD006303<br>2) J. Geophys. Res., 113, D18311,2008, doi:10.1029/2008JD009861 |
|           | Sampling technique               | Canister                                                                                                                            |
|           | Analysis and detection technique | Preconcentration/GC-MS                                                                                                              |
|           | Standard referred to             | Gravimetrically prepared standard gas                                                                                               |
| <b>50</b> | Platform type and name           | Ship, M/S Pyxis                                                                                                                     |
|           | Expedition name                  | NIES Global Halocarbon Monitoring Project                                                                                           |
|           | Cruise start date (UTC)          | 3/10/2005 2:00                                                                                                                      |
|           | EXPOCODE                         | 49P120050310                                                                                                                        |
|           | Dataset creator                  | Yoko Yokouchi                                                                                                                       |
|           | PI contact details               | Yoko Yokouchi, NIES, yokouchi@nies.go.jp                                                                                            |
|           | Data set origin                  | Mail submission: Yoko Yokouchi,yokouchi@nies.go.jp, March 2010                                                                      |
|           | Relevant publications            | 1) J. Geophys. Res., 110, D23309, 2005, doi:10.1029/2005JD006303<br>2) J. Geophys. Res., 113, D18311,2008, doi:10.1029/2008JD009861 |
|           | Sampling technique               | Canister                                                                                                                            |
|           | Analysis and detection technique | Preconcentration/GC-MS                                                                                                              |
|           | Standard referred to             | Gravimetrically prepared standard gas                                                                                               |
| <b>51</b> | Platform type and name           | Ship, M/S Pyxis                                                                                                                     |
|           | Expedition name                  | NIES Global Halocarbon Monitoring Project                                                                                           |
|           | Cruise start date (UTC)          | 3/14/2003 3:00                                                                                                                      |
|           | EXPOCODE                         | 49P120030314                                                                                                                        |
|           | Dataset creator                  | Yoko Yokouchi                                                                                                                       |
|           | PI contact details               | Yoko Yokouchi, NIES, yokouchi@nies.go.jp                                                                                            |
|           | Data set origin                  | Mail submission: Yoko Yokouchi,yokouchi@nies.go.jp, March 2010                                                                      |
|           | Relevant publications            | 1) J. Geophys. Res., 110, D23309, 2005, doi:10.1029/2005JD006303<br>2) J. Geophys. Res., 113, D18311,2008, doi:10.1029/2008JD009861 |

|    |                                  |                                                                                                                                     |
|----|----------------------------------|-------------------------------------------------------------------------------------------------------------------------------------|
|    | Sampling technique               | Canister                                                                                                                            |
|    | Analysis and detection technique | Preconcentration/GC-MS                                                                                                              |
|    | Standard referred to             | Gravimetrically prepared standard gas                                                                                               |
| 52 | Platform type and name           | Ship, M/S Pyxis                                                                                                                     |
|    | Expedition name                  | NIES Global Halocarbon Monitoring Project                                                                                           |
|    | Cruise start date (UTC)          | 3/20/2004 3:00                                                                                                                      |
|    | EXPOCODE                         | 49P120040320                                                                                                                        |
|    | Dataset creator                  | Yoko Yokouchi                                                                                                                       |
|    | PI contact details               | Yoko Yokouchi, NIES, yokouchi@nies.go.jp                                                                                            |
|    | Data set origin                  | Mail submission: Yoko Yokouchi,yokouchi@nies.go.jp, March 2010                                                                      |
|    | Relevant publications            | 1) J. Geophys. Res., 110, D23309, 2005, doi:10.1029/2005JD006303<br>2) J. Geophys. Res., 113, D18311,2008, doi:10.1029/2008JD009861 |
|    | Sampling technique               | Canister                                                                                                                            |
|    | Analysis and detection technique | Preconcentration/GC-MS                                                                                                              |
|    | Standard referred to             | Gravimetrically prepared standard gas                                                                                               |
| 53 | Platform type and name           | Ship, M/S Pyxis                                                                                                                     |
|    | Expedition name                  | NIES Global Halocarbon Monitoring Project                                                                                           |
|    | Cruise start date (UTC)          | 4/21/2005 3:00                                                                                                                      |
|    | EXPOCODE                         | 49P120050421                                                                                                                        |
|    | Dataset creator                  | Yoko Yokouchi                                                                                                                       |
|    | PI contact details               | Yoko Yokouchi, NIES, yokouchi@nies.go.jp                                                                                            |
|    | Data set origin                  | Mail submission: Yoko Yokouchi,yokouchi@nies.go.jp, March 2010                                                                      |
|    | Relevant publications            | 1) J. Geophys. Res., 110, D23309, 2005, doi:10.1029/2005JD006303<br>2) J. Geophys. Res., 113, D18311,2008, doi:10.1029/2008JD009861 |
|    | Sampling technique               | Canister                                                                                                                            |
|    | Analysis and detection technique | Preconcentration/GC-MS                                                                                                              |
|    | Standard referred to             | Gravimetrically prepared standard gas                                                                                               |

|    |                                  |                                                                                                                                     |
|----|----------------------------------|-------------------------------------------------------------------------------------------------------------------------------------|
| 54 | Platform type and name           | Ship, M/S Pyxis                                                                                                                     |
|    | Expedition name                  | NIES Global Halocarbon Monitoring Project                                                                                           |
|    | Cruise start date (UTC)          | 4/26/2003 1:50                                                                                                                      |
|    | EXPOCODE                         | 49P120030426                                                                                                                        |
|    | Dataset creator                  | Yoko Yokouchi                                                                                                                       |
|    | PI contact details               | Yoko Yokouchi, NIES, yokouchi@nies.go.jp                                                                                            |
|    | Data set origin                  | Mail submission: Yoko Yokouchi,yokouchi@nies.go.jp, March 2010                                                                      |
|    | Relevant publications            | 1) J. Geophys. Res., 110, D23309, 2005, doi:10.1029/2005JD006303<br>2) J. Geophys. Res., 113, D18311,2008, doi:10.1029/2008JD009861 |
|    | Sampling technique               | Canister                                                                                                                            |
|    | Analysis and detection technique | Preconcentration/GC-MS                                                                                                              |
| 55 | Standard referred to             | Gravimetrically prepared standard gas                                                                                               |
|    | Platform type and name           | Ship, M/S Pyxis                                                                                                                     |
|    | Expedition name                  | NIES Global Halocarbon Monitoring Project                                                                                           |
|    | Cruise start date (UTC)          | 5/14/2004 2:00                                                                                                                      |
|    | EXPOCODE                         | 49P120040514                                                                                                                        |
|    | Dataset creator                  | Yoko Yokouchi                                                                                                                       |
|    | PI contact details               | Yoko Yokouchi, NIES, yokouchi@nies.go.jp                                                                                            |
|    | Data set origin                  | Mail submission: Yoko Yokouchi,yokouchi@nies.go.jp, March 2010                                                                      |
|    | Relevant publications            | 1) J. Geophys. Res., 110, D23309, 2005, doi:10.1029/2005JD006303<br>2) J. Geophys. Res., 113, D18311,2008, doi:10.1029/2008JD009861 |
|    | Sampling technique               | Canister                                                                                                                            |
|    | Analysis and detection technique | Preconcentration/GC-MS                                                                                                              |
|    | Standard referred to             | Gravimetrically prepared standard gas                                                                                               |

|    |                                  |                                                                                                                                     |
|----|----------------------------------|-------------------------------------------------------------------------------------------------------------------------------------|
| 56 | Platform type and name           | Ship, M/S Pyxis                                                                                                                     |
|    | Expedition name                  | NIES Global Halocarbon Monitoring Project                                                                                           |
|    | Cruise start date (UTC)          | 5/24/2003 2:49                                                                                                                      |
|    | EXPOCODE                         | 49P120030524                                                                                                                        |
|    | Dataset creator                  | Yoko Yokouchi                                                                                                                       |
|    | PI contact details               | Yoko Yokouchi, NIES, yokouchi@nies.go.jp                                                                                            |
|    | Data set origin                  | Mail submission: Yoko Yokouchi,yokouchi@nies.go.jp, March 2010                                                                      |
|    | Relevant publications            | 1) J. Geophys. Res., 110, D23309, 2005, doi:10.1029/2005JD006303<br>2) J. Geophys. Res., 113, D18311,2008, doi:10.1029/2008JD009861 |
|    | Sampling technique               | Canister                                                                                                                            |
|    | Analysis and detection technique | Preconcentration/GC-MS                                                                                                              |
| 57 | Standard referred to             | Gravimetrically prepared standard gas                                                                                               |
|    | Platform type and name           | Ship, M/S Pyxis                                                                                                                     |
|    | Expedition name                  | NIES Global Halocarbon Monitoring Project                                                                                           |
|    | Cruise start date (UTC)          | 5/24/2005 3:00                                                                                                                      |
|    | EXPOCODE                         | 49P120050524                                                                                                                        |
|    | Dataset creator                  | Yoko Yokouchi                                                                                                                       |
|    | PI contact details               | Yoko Yokouchi, NIES, yokouchi@nies.go.jp                                                                                            |
|    | Data set origin                  | Mail submission: Yoko Yokouchi,yokouchi@nies.go.jp, March 2010                                                                      |
|    | Relevant publications            | 1) J. Geophys. Res., 110, D23309, 2005, doi:10.1029/2005JD006303<br>2) J. Geophys. Res., 113, D18311,2008, doi:10.1029/2008JD009861 |
|    | Sampling technique               | Canister                                                                                                                            |
|    | Analysis and detection technique | Preconcentration/GC-MS                                                                                                              |
|    | Standard referred to             | Gravimetrically prepared standard gas                                                                                               |

|    |                                  |                                                                                                                                     |
|----|----------------------------------|-------------------------------------------------------------------------------------------------------------------------------------|
| 58 | Platform type and name           | Ship, M/S Skaubryn                                                                                                                  |
|    | Expedition name                  | NIES Global Halocarbon Monitoring Project                                                                                           |
|    | Cruise start date (UTC)          | 6/5/2005 12:19                                                                                                                      |
|    | EXPOCODE                         | 58SK20050605                                                                                                                        |
|    | Dataset creator                  | Yoko Yokouchi                                                                                                                       |
|    | PI contact details               | Yoko Yokouchi, NIES, yokouchi@nies.go.jp                                                                                            |
|    | Data set origin                  | Mail submission: Yoko Yokouchi,yokouchi@nies.go.jp, March 2010                                                                      |
|    | Relevant publications            | 1) J. Geophys. Res., 110, D23309, 2005, doi:10.1029/2005JD006303<br>2) J. Geophys. Res., 113, D18311,2008, doi:10.1029/2008JD009861 |
|    | Sampling technique               | Canister                                                                                                                            |
|    | Analysis and detection technique | Preconcentration/GC-MS                                                                                                              |
|    | Standard referred to             | Gravimetrically prepared standard gas                                                                                               |
| 59 | Platform type and name           | Ship, M/S Pyxis                                                                                                                     |
|    | Expedition name                  | NIES Global Halocarbon Monitoring Project                                                                                           |
|    | Cruise start date (UTC)          | 6/22/2005 3:00                                                                                                                      |
|    | EXPOCODE                         | 49P120050622                                                                                                                        |
|    | Dataset creator                  | Yoko Yokouchi                                                                                                                       |
|    | PI contact details               | Yoko Yokouchi, NIES, yokouchi@nies.go.jp                                                                                            |
|    | Data set origin                  | Mail submission: Yoko Yokouchi,yokouchi@nies.go.jp, March 2010                                                                      |
|    | Relevant publications            | 1) J. Geophys. Res., 110, D23309, 2005, doi:10.1029/2005JD006303<br>2) J. Geophys. Res., 113, D18311,2008, doi:10.1029/2008JD009861 |
|    | Sampling technique               | Canister                                                                                                                            |
|    | Analysis and detection technique | Preconcentration/GC-MS                                                                                                              |
|    | Standard referred to             | Gravimetrically prepared standard gas                                                                                               |

|           |                                  |                                                                                                                                     |
|-----------|----------------------------------|-------------------------------------------------------------------------------------------------------------------------------------|
| <b>60</b> | Platform type and name           | Ship, M/S Pyxis                                                                                                                     |
|           | Expedition name                  | NIES Global Halocarbon Monitoring Project                                                                                           |
|           | Cruise start date (UTC)          | 6/25/2004 2:00                                                                                                                      |
|           | EXPOCODE                         | 49P120040625                                                                                                                        |
|           | Dataset creator                  | Yoko Yokouchi                                                                                                                       |
|           | PI contact details               | Yoko Yokouchi, NIES, yokouchi@nies.go.jp                                                                                            |
|           | Data set origin                  | Mail submission: Yoko Yokouchi,yokouchi@nies.go.jp, March 2010                                                                      |
|           | Relevant publications            | 1) J. Geophys. Res., 110, D23309, 2005, doi:10.1029/2005JD006303<br>2) J. Geophys. Res., 113, D18311,2008, doi:10.1029/2008JD009861 |
|           | Sampling technique               | Canister                                                                                                                            |
|           | Analysis and detection technique | Preconcentration/GC-MS                                                                                                              |
|           | Standard referred to             | Gravimetrically prepared standard gas                                                                                               |
| <b>61</b> | Platform type and name           | Ship, M/S Pyxis                                                                                                                     |
|           | Expedition name                  | NIES Global Halocarbon Monitoring Project                                                                                           |
|           | Cruise start date (UTC)          | 7/19/2003 2:00                                                                                                                      |
|           | EXPOCODE                         | 49P120030719                                                                                                                        |
|           | Dataset creator                  | Yoko Yokouchi                                                                                                                       |
|           | PI contact details               | Yoko Yokouchi, NIES, yokouchi@nies.go.jp                                                                                            |
|           | Data set origin                  | Mail submission: Yoko Yokouchi,yokouchi@nies.go.jp, March 2010                                                                      |
|           | Relevant publications            | 1) J. Geophys. Res., 110, D23309, 2005, doi:10.1029/2005JD006303<br>2) J. Geophys. Res., 113, D18311,2008, doi:10.1029/2008JD009861 |
|           | Sampling technique               | Canister                                                                                                                            |
|           | Analysis and detection technique | Preconcentration/GC-MS                                                                                                              |
|           | Standard referred to             | Gravimetrically prepared standard gas                                                                                               |

|           |                                  |                                                                                                                                     |
|-----------|----------------------------------|-------------------------------------------------------------------------------------------------------------------------------------|
| <b>62</b> | Platform type and name           | Ship, M/S Pyxis                                                                                                                     |
|           | Expedition name                  | NIES Global Halocarbon Monitoring Project                                                                                           |
|           | Cruise start date (UTC)          | 7/26/2004 2:00                                                                                                                      |
|           | EXPOCODE                         | 49P120040726                                                                                                                        |
|           | Dataset creator                  | Yoko Yokouchi                                                                                                                       |
|           | PI contact details               | Yoko Yokouchi, NIES, yokouchi@nies.go.jp                                                                                            |
|           | Data set origin                  | Mail submission: Yoko Yokouchi,yokouchi@nies.go.jp, March 2010                                                                      |
|           | Relevant publications            | 1) J. Geophys. Res., 110, D23309, 2005, doi:10.1029/2005JD006303<br>2) J. Geophys. Res., 113, D18311,2008, doi:10.1029/2008JD009861 |
|           | Sampling technique               | Canister                                                                                                                            |
|           | Analysis and detection technique | Preconcentration/GC-MS                                                                                                              |
| <b>63</b> | Standard referred to             | Gravimetrically prepared standard gas                                                                                               |
|           | Platform type and name           | Ship, M/S Skaubryn                                                                                                                  |
|           | Expedition name                  | NIES Global Halocarbon Monitoring Project                                                                                           |
|           | Cruise start date (UTC)          | 7/27/2005 12:07                                                                                                                     |
|           | EXPOCODE                         | 58SK20050727                                                                                                                        |
|           | Dataset creator                  | Yoko Yokouchi                                                                                                                       |
|           | PI contact details               | Yoko Yokouchi, NIES, yokouchi@nies.go.jp                                                                                            |
|           | Data set origin                  | Mail submission: Yoko Yokouchi,yokouchi@nies.go.jp, March 2010                                                                      |
|           | Relevant publications            | 1) J. Geophys. Res., 110, D23309, 2005, doi:10.1029/2005JD006303<br>2) J. Geophys. Res., 113, D18311,2008, doi:10.1029/2008JD009861 |
|           | Sampling technique               | Canister                                                                                                                            |
|           | Analysis and detection technique | Preconcentration/GC-MS                                                                                                              |

|    |                                  |                                                                                                                                     |
|----|----------------------------------|-------------------------------------------------------------------------------------------------------------------------------------|
|    | Standard referred to             | Gravimetrically prepared standard gas                                                                                               |
| 64 | Platform type and name           | Ship, M/S Pyxis                                                                                                                     |
|    | Platform name                    | M/S Pyxis                                                                                                                           |
|    | Expedition name                  | NIES Global Halocarbon Monitoring Project                                                                                           |
|    | Cruise start date (UTC)          | 8/21/2005 3:00                                                                                                                      |
|    | EXPOCODE                         | 49P120050821                                                                                                                        |
|    | Dataset creator                  | Yoko Yokouchi                                                                                                                       |
|    | PI contact details               | Yoko Yokouchi, NIES, yokouchi@nies.go.jp                                                                                            |
|    | Data set origin                  | Mail submission: Yoko Yokouchi,yokouchi@nies.go.jp, March 2010                                                                      |
|    | Relevant publications            | 1) J. Geophys. Res., 110, D23309, 2005, doi:10.1029/2005JD006303<br>2) J. Geophys. Res., 113, D18311,2008, doi:10.1029/2008JD009861 |
|    | Sampling technique               | Canister                                                                                                                            |
|    | Analysis and detection technique | Preconcentration/GC-MS                                                                                                              |
|    | Standard referred to             | Gravimetrically prepared standard gas                                                                                               |
| 65 | Platform type and name           | Ship, M/S Pyxis                                                                                                                     |
|    | Expedition name                  | NIES Global Halocarbon Monitoring Project                                                                                           |
|    | Cruise start date (UTC)          | 8/24/2003 2:00                                                                                                                      |
|    | EXPOCODE                         | 49P120030824                                                                                                                        |
|    | Dataset creator                  | Yoko Yokouchi                                                                                                                       |
|    | PI contact details               | Yoko Yokouchi, NIES, yokouchi@nies.go.jp                                                                                            |
|    | Data set origin                  | Mail submission: Yoko Yokouchi,yokouchi@nies.go.jp, March 2010                                                                      |
|    | Relevant publications            | 1) J. Geophys. Res., 110, D23309, 2005, doi:10.1029/2005JD006303<br>2) J. Geophys. Res., 113, D18311,2008, doi:10.1029/2008JD009861 |
|    | Sampling technique               | Canister                                                                                                                            |
|    | Analysis and detection technique | Preconcentration/GC-MS                                                                                                              |
|    | Standard referred to             | Gravimetrically prepared standard gas                                                                                               |



|    |                                  |                                                                                                                                     |
|----|----------------------------------|-------------------------------------------------------------------------------------------------------------------------------------|
| 66 | Platform type and name           | Ship, M/S Pyxis                                                                                                                     |
|    | Expedition name                  | NIES Global Halocarbon Monitoring Project                                                                                           |
|    | Cruise start date (UTC)          | 9/19/2004 3:00                                                                                                                      |
|    | EXPOCODE                         | 49P120040919                                                                                                                        |
|    | Dataset creator                  | Yoko Yokouchi                                                                                                                       |
|    | PI contact details               | Yoko Yokouchi, NIES, yokouchi@nies.go.jp                                                                                            |
|    | Data set origin                  | Mail submission: Yoko Yokouchi,yokouchi@nies.go.jp, March 2010                                                                      |
|    | Relevant publications            | 1) J. Geophys. Res., 110, D23309, 2005, doi:10.1029/2005JD006303<br>2) J. Geophys. Res., 113, D18311,2008, doi:10.1029/2008JD009861 |
|    | Sampling technique               | Canister                                                                                                                            |
|    | Analysis and detection technique | Preconcentration/GC-MS                                                                                                              |
|    | Standard referred to             | Gravimetrically prepared standard gas                                                                                               |
| 67 | Platform type and name           | Ship, M/S Pyxis                                                                                                                     |
|    | Expedition name                  | NIES Global Halocarbon Monitoring Project                                                                                           |
|    | Cruise start date (UTC)          | 9/24/2003 2:00                                                                                                                      |
|    | EXPOCODE                         | 49P120030924                                                                                                                        |
|    | Dataset creator                  | Yoko Yokouchi                                                                                                                       |
|    | PI contact details               | Yoko Yokouchi, NIES, yokouchi@nies.go.jp                                                                                            |
|    | Data set origin                  | Mail submission: Yoko Yokouchi,yokouchi@nies.go.jp, March 2010                                                                      |
|    | Relevant publications            | 1) J. Geophys. Res., 110, D23309, 2005, doi:10.1029/2005JD006303<br>2) J. Geophys. Res., 113, D18311,2008, doi:10.1029/2008JD009861 |
|    | Sampling technique               | Canister                                                                                                                            |
|    | Analysis and detection technique | Preconcentration/GC-MS                                                                                                              |
|    | Standard referred to             | Gravimetrically prepared standard gas                                                                                               |

|           |                                  |                                                                                                                                     |
|-----------|----------------------------------|-------------------------------------------------------------------------------------------------------------------------------------|
| <b>68</b> | Platform type and name           | Ship, M/S Skaubryn                                                                                                                  |
|           | Expedition name                  | NIES Global Halocarbon Monitoring Project                                                                                           |
|           | Cruise start date (UTC)          | 9/26/2005 0:09                                                                                                                      |
|           | EXPOCODE                         | 58SK20050926                                                                                                                        |
|           | Dataset creator                  | Yoko Yokouchi                                                                                                                       |
|           | PI contact details               | Yoko Yokouchi, NIES, yokouchi@nies.go.jp                                                                                            |
|           | Data set origin                  | Mail submission: Yoko Yokouchi,yokouchi@nies.go.jp, March 2010                                                                      |
|           | Relevant publications            | 1) J. Geophys. Res., 110, D23309, 2005, doi:10.1029/2005JD006303<br>2) J. Geophys. Res., 113, D18311,2008, doi:10.1029/2008JD009861 |
|           | Sampling technique               | Canister                                                                                                                            |
|           | Analysis and detection technique | Preconcentration/GC-MS                                                                                                              |
| <b>69</b> | Standard referred to             | Gravimetrically prepared standard gas                                                                                               |
|           | Platform type and name           | Ship, M/S Pyxis                                                                                                                     |
|           | Expedition name                  | NIES Global Halocarbon Monitoring Project                                                                                           |
|           | Cruise start date (UTC)          | 10/17/2005 2:00                                                                                                                     |
|           | EXPOCODE                         | 49P120051017                                                                                                                        |
|           | Dataset creator                  | Yoko Yokouchi                                                                                                                       |
|           | PI contact details               | Yoko Yokouchi, NIES, yokouchi@nies.go.jp                                                                                            |
|           | Data set origin                  | Mail submission: Yoko Yokouchi,yokouchi@nies.go.jp, March 2010                                                                      |
|           | Relevant publications            | 1) J. Geophys. Res., 110, D23309, 2005, doi:10.1029/2005JD006303<br>2) J. Geophys. Res., 113, D18311,2008, doi:10.1029/2008JD009861 |
|           | Sampling technique               | Canister                                                                                                                            |
|           | Analysis and detection technique | Preconcentration/GC-MS                                                                                                              |
|           | Standard referred to             | Gravimetrically prepared standard gas                                                                                               |

|           |                                  |                                                                                                                                     |
|-----------|----------------------------------|-------------------------------------------------------------------------------------------------------------------------------------|
| <b>70</b> | Platform type and name           | Ship, M/S Pyxis                                                                                                                     |
|           | Expedition name                  | NIES Global Halocarbon Monitoring Project                                                                                           |
|           | Cruise start date (UTC)          | 10/28/2003 1:00                                                                                                                     |
|           | EXPOCODE                         | 49P120031028                                                                                                                        |
|           | Dataset creator                  | Yoko Yokouchi                                                                                                                       |
|           | PI contact details               | Yoko Yokouchi, NIES, yokouchi@nies.go.jp                                                                                            |
|           | Data set origin                  | Mail submission: Yoko Yokouchi,yokouchi@nies.go.jp, March 2010                                                                      |
|           | Relevant publications            | 1) J. Geophys. Res., 110, D23309, 2005, doi:10.1029/2005JD006303<br>2) J. Geophys. Res., 113, D18311,2008, doi:10.1029/2008JD009861 |
|           | Sampling technique               | Canister                                                                                                                            |
|           | Analysis and detection technique | Preconcentration/GC-MS                                                                                                              |
|           | Standard referred to             | Gravimetrically prepared standard gas                                                                                               |
| <b>71</b> | Platform type and name           | Ship, M/S Pyxis                                                                                                                     |
|           | Expedition name                  | NIES Global Halocarbon Monitoring Project                                                                                           |
|           | Cruise start date (UTC)          | 11/14/2004 2:00                                                                                                                     |
|           | EXPOCODE                         | 49P120041114                                                                                                                        |
|           | Dataset creator                  | Yoko Yokouchi                                                                                                                       |
|           | PI contact details               | Yoko Yokouchi, NIES, yokouchi@nies.go.jp                                                                                            |
|           | Data set origin                  | Mail submission: Yoko Yokouchi,yokouchi@nies.go.jp, March 2010                                                                      |
|           | Relevant publications            | 1) J. Geophys. Res., 110, D23309, 2005, doi:10.1029/2005JD006303<br>2) J. Geophys. Res., 113, D18311,2008, doi:10.1029/2008JD009861 |
|           | Sampling technique               | Canister                                                                                                                            |
|           | Analysis and detection technique | Preconcentration/GC-MS                                                                                                              |
|           | Standard referred to             | Gravimetrically prepared standard gas                                                                                               |

|    |                                  |                                                                                                                                     |
|----|----------------------------------|-------------------------------------------------------------------------------------------------------------------------------------|
| 72 | Platform type and name           | Ship, M/S Skaubryn                                                                                                                  |
|    | Expedition name                  | NIES Global Halocarbon Monitoring Project                                                                                           |
|    | Cruise start date (UTC)          | 11/15/2005 12:07                                                                                                                    |
|    | EXPOCODE                         | 58SK20051115                                                                                                                        |
|    | Dataset creator                  | Yoko Yokouchi                                                                                                                       |
|    | PI contact details               | Yoko Yokouchi, NIES, yokouchi@nies.go.jp                                                                                            |
|    | Data set origin                  | Mail submission: Yoko Yokouchi,yokouchi@nies.go.jp, March 2010                                                                      |
|    | Relevant publications            | 1) J. Geophys. Res., 110, D23309, 2005, doi:10.1029/2005JD006303<br>2) J. Geophys. Res., 113, D18311,2008, doi:10.1029/2008JD009861 |
|    | Sampling technique               | Canister                                                                                                                            |
|    | Analysis and detection technique | Preconcentration/GC-MS                                                                                                              |
| 73 | Standard referred to             | Gravimetrically prepared standard gas                                                                                               |
|    | Platform type and name           | Ship, M/S Pyxis                                                                                                                     |
|    | Expedition name                  | NIES Global Halocarbon Monitoring Project                                                                                           |
|    | Cruise start date (UTC)          | 12/15/2005 2:00                                                                                                                     |
|    | EXPOCODE                         | 49P120051215                                                                                                                        |
|    | Dataset creator                  | Yoko Yokouchi                                                                                                                       |
|    | PI contact details               | Yoko Yokouchi, NIES, yokouchi@nies.go.jp                                                                                            |
|    | Data set origin                  | Mail submission: Yoko Yokouchi,yokouchi@nies.go.jp, March 2010                                                                      |
|    | Relevant publications            | 1) J. Geophys. Res., 110, D23309, 2005, doi:10.1029/2005JD006303<br>2) J. Geophys. Res., 113, D18311,2008, doi:10.1029/2008JD009861 |
|    | Sampling technique               | Canister                                                                                                                            |
|    | Analysis and detection technique | Preconcentration/GC-MS                                                                                                              |
|    | Standard referred to             | Gravimetrically prepared standard gas                                                                                               |

|    |                                  |                                                                                                                                     |
|----|----------------------------------|-------------------------------------------------------------------------------------------------------------------------------------|
| 74 | Platform type and name           | Ship, M/S Pyxis                                                                                                                     |
|    | Expedition name                  | NIES Global Halocarbon Monitoring Project                                                                                           |
|    | Cruise start date (UTC)          | 12/20/2003 2:00                                                                                                                     |
|    | EXPOCODE                         | 49P120031220                                                                                                                        |
|    | Dataset creator                  | Yoko Yokouchi                                                                                                                       |
|    | PI contact details               | Yoko Yokouchi, NIES, yokouchi@nies.go.jp                                                                                            |
|    | Data set origin                  | Mail submission: Yoko Yokouchi,yokouchi@nies.go.jp, March 2010                                                                      |
|    | Relevant publications            | 1) J. Geophys. Res., 110, D23309, 2005, doi:10.1029/2005JD006303<br>2) J. Geophys. Res., 113, D18311,2008, doi:10.1029/2008JD009861 |
|    | Sampling technique               | Canister                                                                                                                            |
|    | Analysis and detection technique | Preconcentration/GC-MS                                                                                                              |
|    | Standard referred to             | Gravimetrically prepared standard gas                                                                                               |
