# Supplementary material for: Global sea-to-air flux climatology for bromoform, dibromomethane and methyl iodide
Source: Copernicus journal article supplement (doi:10.5194/acp-13-8915-2013), 2013-09-06
Supplement: Supplementary file 3 [file acp-13-8915-2013-supplement.zip]

## Supplement: Additional Material

**Table S1.** Classification of the 21 open ocean water regions. Additionally the number of ingoing in-situ measurements of bromoform and the Root Mean Square Error (RMSE) in  $\text{pmol L}^{-1}$  for the *Robust Fit (RF)* and *Ordinary Least Square (OLS)* regression techniques are shown. The orders of the regression method used are marked by crosses. Options are: in dependency of latitude (lat) and longitude (lon) or only latitude. Regions with no crosses indicate that the linear regression of neighboring open ocean regions of the same latitudinal band is used for filling the missing values.

| region                  | area          |            | basin    | observations | regression with lat |            | regression with lon/lat |            | RMSE      |            |
|-------------------------|---------------|------------|----------|--------------|---------------------|------------|-------------------------|------------|-----------|------------|
|                         | longitude     | latitude   |          |              | <i>RF</i>           | <i>OLS</i> | <i>RF</i>               | <i>OLS</i> | <i>RF</i> | <i>OLS</i> |
| 1                       | 180°E - 180°W | 90° - 66°N | Arctic   | 30           | x                   |            |                         |            | 2.87      | 7.19       |
| 2                       | 130°E - 120°W | 66° - 40°N | Pacific  | 369          |                     | x          | x                       |            | 0.32      | 1.69       |
| 3                       | 100°E - 77°W  | 40° - 5°N  | Pacific  | 617          |                     |            | x                       | x          | 0.65      | 1.08       |
| 4                       | 102°E - 80°W  | 5°N - 0°   | Pacific  | 228          |                     |            | x                       | x          | 0.43      | 1.65       |
| 5                       | 102°E - 80°W  | 0° - 5°S   | Pacific  | 28           |                     |            | x                       | x          | 2.16      | 4.52       |
| 6                       | 70°E - 129°W  | 5° - 40°S  | Pacific  | 137          |                     |            | x                       | x          | 2.09      | 2.06       |
| 7                       | 65°E - 140°W  | 40° - 66°S | Pacific  | 212          |                     |            |                         |            | 1.82      | 7.39       |
| 8                       | 65°E - 140°W  | 66° - 90°S | Pacific  | 471          |                     |            |                         |            | 0.74      | 1.99       |
| 9                       | 93°W - 23°E   | 66° - 40°N | Atlantic | 1398         | x                   | x          |                         |            | 1.31      | 16.55      |
| 10                      | 98°W - 42°E   | 40° - 5°N  | Atlantic | 892          |                     |            | x                       |            | 1.55      | 13.01      |
| 11                      | 50°W - 9°E    | 5°N - 0°   | Atlantic | 57           |                     | x          | x                       |            | 7.42      | 3.77       |
| 12                      | 50°W - 9°E    | 0° - 5°S   | Atlantic | 112          |                     | x          | x                       |            | 0.30      | 9.15       |
| 13                      | 57°W - 7°E    | 5° - 40°S  | Atlantic | 213          |                     |            | x                       | x          | 1.67      | 0.87       |
| 14                      | 65°W - 20°E   | 40° - 66°S | Atlantic | 266          |                     |            |                         |            | 1.82      | 7.39       |
| 15                      | 65°W - 20°E   | 66° - 90°S | Atlantic | 6            |                     |            |                         |            | 0.74      | 1.99       |
| 16                      | 38° - 98°E    | 40° - 5°N  | Indic    | 7            |                     |            |                         | x          | 1.10      | 38.0       |
| 17                      | 42° - 98°E    | 5°N - 0°   | Indic    | -            |                     |            |                         |            | 0.83      | 2.59       |
| 18                      | 40° - 100°E   | 0° - 5°S   | Indic    | -            |                     |            |                         |            | 6.39      | 8.91       |
| 19                      | 34° - 129°E   | 5° - 40°S  | Indic    | 3            |                     |            |                         |            | 0.58      | 13.01      |
| 20                      | 20° - 140°E   | 40° - 66°S | Indic    | 91           |                     |            |                         |            | 1.82      | 7.39       |
| 21                      | 20° - 140°E   | 66° - 90°S | Indic    | -            |                     |            |                         |            | 0.74      | 1.99       |
| Global open ocean water |               |            |          | 5137         |                     |            |                         |            |           |            |

**Table S2.** Classification of the 21 open ocean atmosphere regions. Additionally the number of ingoing in-situ measurements and the Root Mean Square Error (RMSE) in ppt for the *Robust Fit (RF)* regression and *Ordinary Least Square (OLS)* regression techniques are shown. The orders of the regression method used are marked by crosses. Options are: in dependency of latitude (lat) and longitude (lon) or only latitude. Regions with no crosses indicate that the linear regression of neighboring open ocean regions of the same latitudinal band is used for filling the missing values.

| region                              | area          |            | basin    | observation | regression with lat |            | regression with lon/lat |            | RMSE      |            |
|-------------------------------------|---------------|------------|----------|-------------|---------------------|------------|-------------------------|------------|-----------|------------|
|                                     | longitude     | latitude   |          |             | <i>RF</i>           | <i>OLS</i> | <i>RF</i>               | <i>OLS</i> | <i>RF</i> | <i>OLS</i> |
| 1                                   | 180°E - 180°W | 90° - 60°N | Arctic   | 16          | x                   |            |                         |            | 0.80      | 0.91       |
| 2                                   | 130°E - 120°W | 60° - 30°N | Pacific  | 428         |                     | x          | x                       |            | 0.12      | 0.22       |
| 3                                   | 100°E - 77°W  | 30° - 10°N | Pacific  | 160         |                     |            | x                       | x          | 0.17      | 0.29       |
| 4                                   | 102°E - 80°W  | 10°N - 0°  | Pacific  | 219         |                     |            | x                       | x          | 0.22      | 0.61       |
| 5                                   | 102°E - 80°W  | 0° - 10°S  | Pacific  | 131         |                     | x          | x                       |            | 0.83      | 0.73       |
| 6                                   | 70°E - 129°W  | 10° - 30°S | Pacific  | 99          |                     | x          | x                       |            | 0.24      | 0.44       |
| 7                                   | 65°E - 140°W  | 30° - 60°S | Pacific  | 392         | x                   |            |                         |            | 0.32      | 0.39       |
| 8                                   | 65°E - 140°W  | 60° - 90°S | Pacific  | 732         |                     |            |                         |            | 0.20      | 0.49       |
| 9                                   | 93°W - 23°E   | 60° - 30°N | Atlantic | 692         |                     |            | x                       |            | 0.47      | 1.10       |
| 10                                  | 98°W - 42°E   | 30° - 10°N | Atlantic | 503         |                     | x          |                         |            | 0.43      | 2.87       |
| 11                                  | 50°W - 9°E    | 10°N - 0°  | Atlantic | 151         |                     | x          | x                       |            | 1.31      | 6.56       |
| 12                                  | 50°W - 9°E    | 0° - 10°S  | Atlantic | 55          |                     | x          |                         |            | 1.18      | 1.32       |
| 13                                  | 57°W - 7°E    | 10° - 30°S | Atlantic | 100         |                     | x          | x                       |            | 0.03      | 0.05       |
| 14                                  | 65°W - 20°E   | 30° - 60°S | Atlantic | 126         |                     |            |                         |            | 0.34      | 0.39       |
| 15                                  | 65°W - 20°E   | 60° - 90°S | Atlantic | 50          |                     |            |                         |            | 0.20      | 0.49       |
| 16                                  | 38° - 98°E    | 30° - 10°N | Indic    | -           |                     |            |                         |            | 0.43      | 5.55       |
| 17                                  | 42° - 98°E    | 10°N - 0°  | Indic    | -           |                     |            |                         |            | 0.57      | 2.98       |
| 18                                  | 40° - 100°E   | 0° - 10°S  | Indic    | -           |                     |            |                         |            | 1.18      | 1.08       |
| 19                                  | 34° - 129°E   | 10° - 30°S | Indic    | -           |                     |            |                         |            | 0.24      | 0.45       |
| 20                                  | 20° - 140°E   | 30° - 60°S | Indic    | 69          |                     |            |                         |            | 0.34      | 0.39       |
| 21                                  | 20° - 140°E   | 60° - 90°S | Indic    | 136         |                     |            |                         |            | 0.20      | 0.49       |
| Global <i>open ocean</i> atmosphere |               |            |          | 4059        |                     |            |                         |            |           |            |

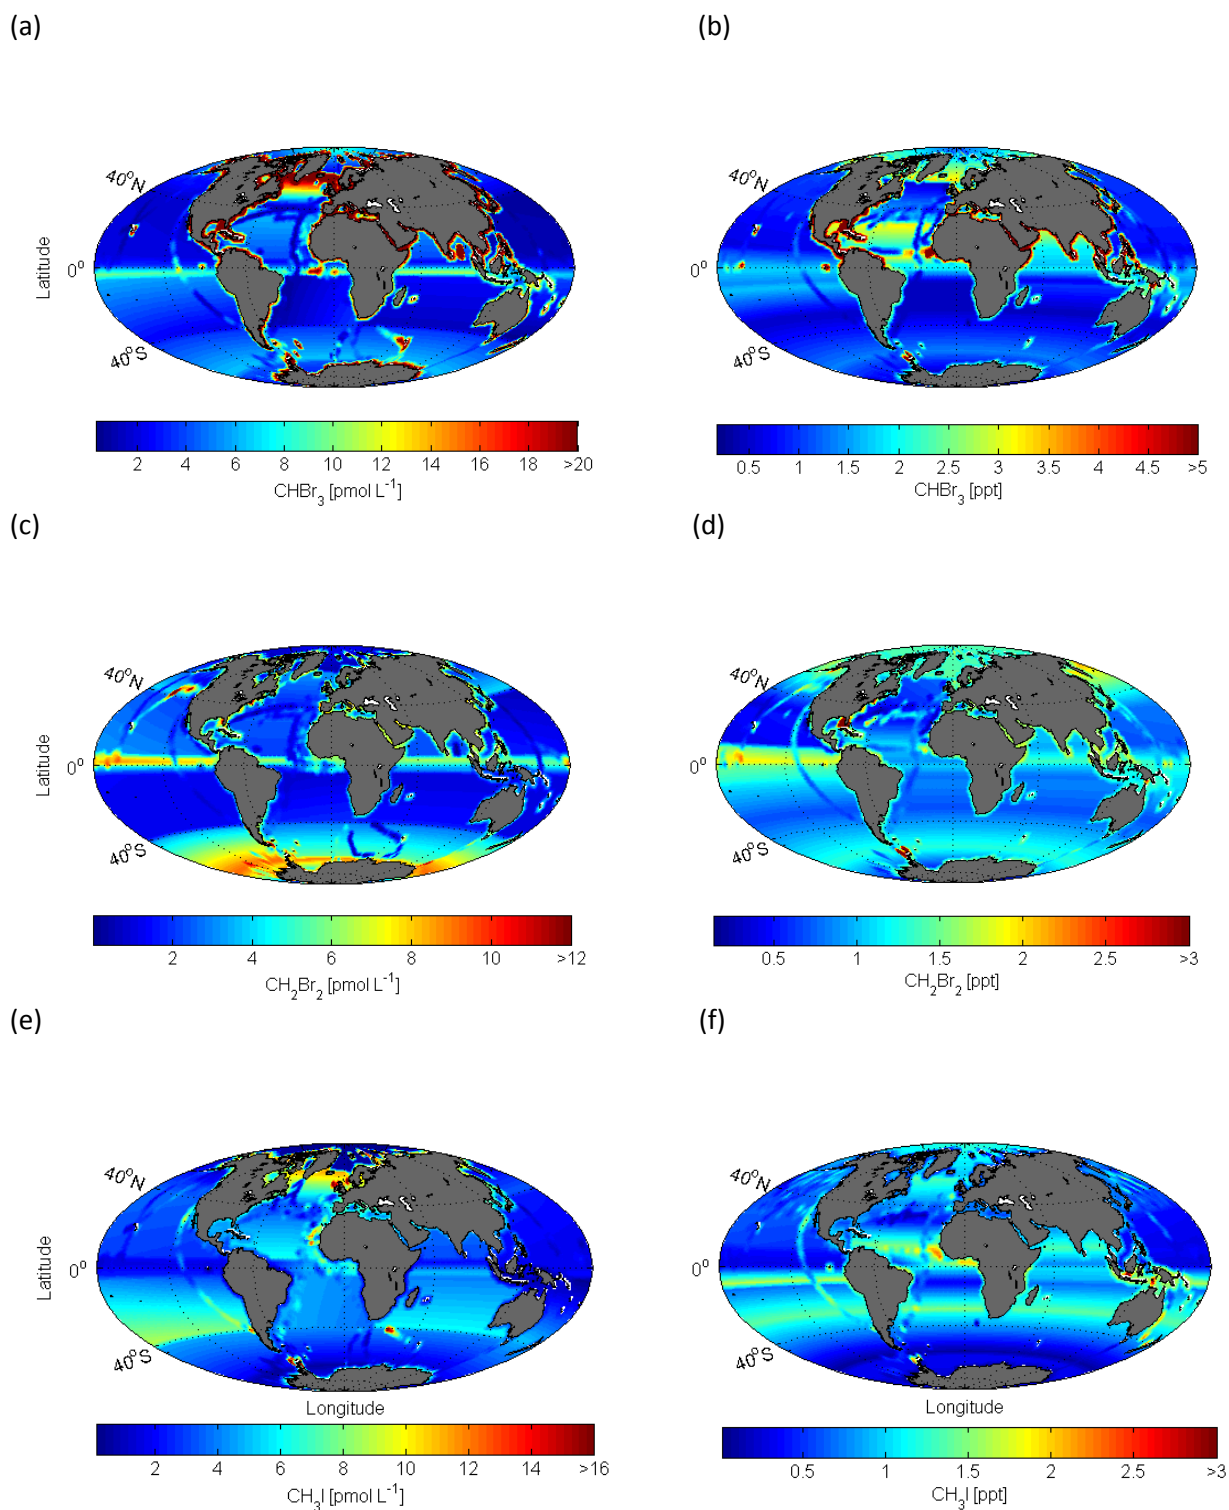

**Figure S3.** Global climatological marine concentrations in  $\text{pmol L}^{-1}$  and atmospheric mixing ratios in ppt maps for bromoform (a,b), dibromomethane (c,d) and methyl iodide (e,f) based on the *OLS* analyses.
